# Supplementary material for: Nematode gene annotation by machine-learning-assisted proteotranscriptomics enables proteome-wide evolutionary analysis
Source: HighWire-hosted journal article supplement (doi:10.1101/gr.277070.122), 2023-01-01
Supplement: Supplemental_Table_S1.xlsx [file Supplemental_Table_S1.xlsx]

## Sheet: Legend
Supplemental_Table_S1
Summary information regarding specie, Transcriptome assemblies, and Genome for the 12 species.

## Sheet: Table_S1
Species Latin Name	Caenorhabditis elegans	Caenorhabditis briggsae	Caenorhabditis brenneri	Caenorhabditis japonica	Caenorhabditis remanei	Pristionchus pacificus	Oscheius Tipulae	Panagrellus redivivus	Caenorhabditis inopinata	Rhabditoides regina	Rhabditella axei	Caenorhabditis drosophilae
Abbreviation in WormBase	c_elegans	c_briggsae	c_brenneri	c_japonica	c_remanei	p_pacificus	o_tipulae	p_redivivus	c_inopinata	r_regina	r_axei	c_drosophilae
CGC strain name		ED3101	CB5161	DF5081	PX506	PS312	CEW1	MT8872	NKZ35	DF5012	DF5006	DF5112
Genus	Caenorhabditis	Caenorhabditis	Caenorhabditis	Caenorhabditis	Caenorhabditis	Pristionchus	Oscheius	Panagrellus	Caenorhabditis	Rhabditoides	Rhabditella	Caenorhabditis
Order	Rhabditida	Rhabditida	Rhabditida	Rhabditida	Rhabditida	Rhabditida	Rhabditida	Rhabditida	Rhabditida	Rhabditoides	Rhabditida	Rhabditida
Family	Rhabditidae	Rhabditidae	Rhabditidae	Rhabditidae	Rhabditidae	Diplogastridae	Rhabditidae	Panagrolaimidae	Rhabditidae	Rhabditidae	Rhabditidae	Rhabditidae
Genome sequenced - incl Project name	PRJNA13758/WS273	PRJNA10731/WS273	PRJNA20035/WS273	PRJNA12591/WS273	PRJNA53967/WS273	PRJNA12644/WS273	PRJEB15512/WS273	PRJNA186477/WS273	PRJDB5687/WS273	-	-	-
Number of contigs in genome	7	367	3305	18817	3670	47	191	940	6	-	-	-
Number of paired-end reads	73863187	62092782	75089972	77184252	71545387	72491819	68656859	77635125	73049384	70296079	65644935	67421606
Number of MSMS spectra	1616347	1616321	1834849	1798026	1799168	1648039	1649955	1637532	1607123	1628239	1644871	1607770
Genome-guided assembly (# transcripts)	41509	41805	64569	64811	61701	65577	36358	34089	42237	-	-	-
Genome-free assembly (# transcripts)	39538	40980	58111	56639	66342	65917	36390	33166	44261	46504	34449	27974
TransRate score of genome-guided assembly	0.38747	0.3726	0.29469	0.29471	0.27794	0.33116	0.57453	0.5205	0.44533	-	-	-
TransRate score of genome-free assembly	0.39356	0.38555	0.33523	0.27031	0.29694	0.35943	0.55947	0.52326	0.39125	0.46206	0.51574	0.47681
N50 genome-free assembly	1851	1840	1744	1746	1785	1719	2034	1843	1857	2095	1875	2136
N50 genome-guided assembly	1633	1629	1311	1134	1548	1561	1943	1643	1722	-	-	-
Ex50N90 genome-free assembly	2515	2593	2609	2058	2280	2306	2489	2286	2551	2371	2343	2389
Ex50N90 genome-guided assembly	2412	2121	2337	1991	2576	3423	2544	2145	2277	-	-	-
Total sequence length	100286401	108384165	190369721	166256191	145442736	158478356	59468623	65093147	122994328	NA	NA	NA
Total ungapped length	100286401	105418679	170093652	154057934	138406388	154957827	59452317	62073019	122580819	NA	NA	NA
Gaps between scaffolds	NA	271	0	0	0	0	0	0	0	NA	NA	NA
Number of scaffolds	6	638	3305	18817	3670	46	191	940	6	NA	NA	NA
Scaffold N50	17500000	727881	381961	94149	435512	23915096	1203411	262414	20594552	NA	NA	NA
Scaffold L50	3	40	120	429	70	3	15	64	3	NA	NA	NA
Number of contigs	6	5074	13373	35931	12676	136	256	19716	29	NA	NA	NA
Contig N50	17500000	45098	31887	10166	30717	4619064	728023	19707	9051690	NA	NA	NA
Contig L50	3	607	1422	3893	1032	12	21	882	5	NA	NA	NA
Total number of chromosomes and plasmids	NA	6	0	0	0	6	0	0	6	NA	NA	NA
Number of component sequences (WGS or clone)	NA	5493	13373	35931	12680	46	191	19716	6	NA	NA	NA
