# Supplementary material for: Nematode gene annotation by machine-learning-assisted proteotranscriptomics enables proteome-wide evolutionary analysis
Source: HighWire-hosted journal article supplement (doi:10.1101/gr.277070.122), 2023-01-01
Supplement: Supplemental_Table_S2.xlsx [file Supplemental_Table_S2.xlsx]

## Sheet: Legend
Supplemental_Table_S2
Information on the number of assembled and evidenced ORFS and their overlap with WormBase ORFS ( in total number and percentage)

## Sheet: Table_S2
Name.of.species	Assembly	Number.of.uniq.ORF.in.WormBase	Number.of.WormBase.proteins.in.the.assembly	Percentage.of.WormBase.proteins.in.the.assembly	Number.of.missed.WormBase.proteins	Percentage.of.missed.WormBase.proteins	Number.of.protein.groups.identified	Percentage.of.WormBase.proteins.in.protein.groups.identified
cbrenneri (C.brenneri)	GF	30705	19467	63.4	11238	36.6	8452	27.5265
cbrenneri (C.brenneri)	GG	30705	20055	65.32	10650	34.68	8868	28.8813
cbriggsae (C.briggsae)	GF	20829	17777	85.35	3052	14.65	6627	31.8162
cbriggsae (C.briggsae)	GG	20829	17626	84.62	3203	15.38	6806	32.6756
celegans (C.elegans)	GF	20127	18794	93.38	1333	6.62	7237	35.9567
celegans (C.elegans)	GG	20127	18858	93.7	1269	6.3	7472	37.1243
CEW1 (O.tipulae)	GF	14626	13051	89.23	1575	10.77	6441	44.038
CEW1 (O.tipulae)	GG	14626	13083	89.45	1543	10.55	6498	44.4277
cinopinata (C.inopinata)	GF	21443	15470	72.14	5973	27.86	7124	33.223
cinopinata (C.inopinata)	GG	21443	15727	73.34	5716	26.66	7440	34.6966
cjaponica (C.japonica)	GF	29935	17125	57.21	12810	42.79	7120	23.7849
cjaponica (C.japonica)	GG	29935	19789	66.11	10146	33.89	8780	29.3302
cremanei (C.remanei)	GF	31438	20268	64.47	11170	35.53	7804	24.8235
cremanei (C.remanei)	GG	31438	20389	64.85	11049	35.15	8133	25.87
MT8872 (P.redivivus)	GF	24249	16944	69.88	7305	30.12	7174	29.5847
MT8872 (P.redivivus)	GG	24249	17612	72.63	6637	27.37	7501	30.9332
ppacificus (P.pacificus)	GF	26068	15217	58.37	10851	41.63	7580	29.0778
ppacificus (P.pacificus)	GG	26068	15168	58.19	10900	41.81	7794	29.8987
DF5006 (R.axei)	GF						7780
DF5012 (R.regina)	GF						6753
DF5112 (C.drosophilae)	GF						6311
