# Supplementary material for: Nematode gene annotation by machine-learning-assisted proteotranscriptomics enables proteome-wide evolutionary analysis
Source: HighWire-hosted journal article supplement (doi:10.1101/gr.277070.122), 2023-01-01
Supplement: Supplemental_Table_S3.xlsx [file Supplemental_Table_S3.xlsx]

## Sheet: Legend
Supplemental_Table_S3
Fragmentation levels of genome-free (GF) and genome-guided (GG) transcriptome assemblies established by the comparison to WormBase annotations (version WB273) of the respective species.

## Sheet: Table_S3
category	C.japonica GF	C.japonica GG	C.brenneri GF	C.brenneri GG	C.remanei GF	C.remanei GG	C.inopinata GF	C.inopinata GG	C.briggsae GG	C.briggsae GF	C.elegans GF	C.elegans GG	P.pacificus GF	P.pacificus GG	O.Tipulae GF	O.Tipulae GG	P.redivivus GF	P.redivivus GG
1	5077	5897	5799	5570	5108	5583	5352	5821	5419	5420	6709	6680	4145	4235	4852	5071	6084	6480
2	101	321	101	222	76	130	93	190	224	120	205	333	527	636	203	229	65	112
3	12	38	7	37	9	17	7	17	22	11	16	24	113	147	7	15	7	9
>3	4	17	8	25	7	8	11	13	16	15	14	16	51	64	NA	1	9	13
