# Supplementary material for: Nematode gene annotation by machine-learning-assisted proteotranscriptomics enables proteome-wide evolutionary analysis
Source: HighWire-hosted journal article supplement (doi:10.1101/gr.277070.122), 2023-01-01
Supplement: Supplemental_Table_S4.xlsx [file Supplemental_Table_S4.xlsx]

## Sheet: Legend
Supplemental_Table_S4
Detailed information on input features used for random forest training

## Sheet: Table_S4
Contig measure	Description	Source
length	Length of contig	Trinity
ORF length	Length of predicted open reading frame	TransDecoder
in_bridges	the number of potential links between contigs that are supported by the reads	TransRate
p_seq_true	a measure of how well supported the sequence content is by the reads that assign to that contig; a low score indicates gene family collapse, or something similar	TransRate
p_not_segmented	the probability that the coverage is best modelled by a single distribution, as opposed to two or more	TransRate
sCnuc	how many changes would have to be made to a read covering a base before the sequence of the read and the covered region of the contig agreed perfectly	TransRate
sCcov	measure of whether each base is truly part of the transcript, estimated by determining whether any reads provide agreeing coverage for a base	TransRate
sCord	probability that the contig is derived from a single transcript (rather than pieces of two or more transcripts).	TransRate
sCseg	probability that the contig is structurally complete and correct.	TransRate
Score	how well is the contig supported by read evidence; contig score is the product of the individual sCnuc, sCcov, sCord, sCseq measures	TransRate
tpm	mRNA level	TransRate (SNAP v1.0.0)
