# Supplementary material for: Nematode gene annotation by machine-learning-assisted proteotranscriptomics enables proteome-wide evolutionary analysis
Source: HighWire-hosted journal article supplement (doi:10.1101/gr.277070.122), 2023-01-01
Supplement: Supplemental_Table_S5.xlsx [file Supplemental_Table_S5.xlsx]

## Sheet: Legend
Supplemental_Table_S5
Information on the assemblies of C. briggsae, Drosophila melanogaster, Arabidopsis thaliana, and H1-hESC that were used for the machine learning benchmarking.
Sheet 1 shows Accession information of the publicly available RNA sequencing data for each species.
Sheet 2 shows the transcript quality features of each transcriptome assembly for each species.

## Sheet: Accession_information_ML_valida
Organism	Category	Strain Name	Developmental stage	SRA Accession	Length of reads	No reads	Sequencing platform
Arabidopsis thaliana	Plants	Col-0	flower stage 15	ERR3333398	76	31172567	Illumina HiSeq 2500
Arabidopsis thaliana	Plants	Col-0	flower stage 9	ERR3333426	76	35100274	Illumina HiSeq 2500
Arabidopsis thaliana	Plants	Col-0	flower stage 10	ERR3333427	76	33899434	Illumina HiSeq 2500
Arabidopsis thaliana	Plants	Col-0	flower stage 11	ERR3333428	76	35361470	Illumina HiSeq 2500
Arabidopsis thaliana	Plants	Col-0	flower stage 12	ERR3333429	76	33077186	Illumina HiSeq 2500
Arabidopsis thaliana	Plants	Col-0	flower stage 13	ERR3333430	76	33583419	Illumina HiSeq 2500
Caenorhabditis briggsae	Nematodes	AF16	C. briggsae mixed embryos	SRR1050782	76	7757872	Illumina Genome Analyzer IIx
Caenorhabditis briggsae	Nematodes	AF16	C. briggsae mixed embryos	SRR1050783	76	2105586	Illumina Genome Analyzer IIx
Caenorhabditis briggsae	Nematodes	AF16	C. briggsae L1 larvae	SRR1050785	76	10120026	Illumina Genome Analyzer IIx
Caenorhabditis briggsae	Nematodes	AF16	C. briggsae L1 larvae	SRR1050786	76	12719780	Illumina Genome Analyzer IIx
Caenorhabditis briggsae	Nematodes	AF16	C. briggsae young adults	SRR1050791	76	16602099	Illumina Genome Analyzer IIx
Caenorhabditis briggsae	Nematodes	AF16	C. briggsae mixed stages	SRR1050793	76	15370016	Illumina Genome Analyzer IIx
Homo sapiens	Mammalian	H1-hESC	Cell line	SRR066678	76	24250248	Illumina Genome Analyzer II
Homo sapiens	Mammalian	H1-hESC	Cell line	SRR066679	76	24809275	Illumina Genome Analyzer II
Drosophila melanogaster	Insects	S2R+	Cell line	SRR5110318	71	22589362	Illumina HiSeq 2500
Drosophila melanogaster	Insects	S2R+	Cell line	SRR5110319	71	28508241	Illumina HiSeq 2500

## Sheet: Assembly_transRate_measures
Source species	Arabidopsis thaliana	Arabidopsis thaliana	Caenorhabditis briggsae	Caenorhabditis briggsae	Homo sapiens	Homo sapiens	Drosophila melanogaster	Drosophila melanogaster
assembly	GF	GG	GF	GG	GF	GG	GF	GG
n_seqs	83914	78562	85076	51329	134131	135618	32054	31045
smallest	187	201	195	201	189	192	181	201
largest	16604	16604	14400	11400	18209	18209	18599	19582
n_bases	110044504	92920186	84558731	59225522	129823659	127597308	48267185	41678068
mean_len	1311.39	1182.76	993.915	1153.84	967.875	940.857	1505.8	1342.51
n_under_200	1	0	2	0	8	1	1	0
n_over_1k	41767	33781	27793	21417	36701	35629	13365	11242
n_over_10k	50	35	22	4	130	112	149	206
n_with_orf	43896	37385	43117	30635	40515	39887	13143	11286
mean_orf_percent	59.9668	61.4418	81.2549	81.3594	60.8962	59.7801	58.7111	60.3978
n90	635	478	385	507	346	340	588	472
n70	1469	1376	1014	1186	954	900	1884	1662
n50	2045	1981	1677	1792	1903	1847	3151	2966
n30	2829	2784	2640	2712	3085	3033	4717	4602
n10	4450	4354	4662	4645	5442	5216	7581	7868
gc	0.41494	0.41347	0.43672	0.43666	0.51058	0.50887	0.46804	0.47072
bases_n	0	0	0	0	0	0	0	0
proportion_n	0	0	0	0	0	0	0	0
fragments	196408576	196408576	52989997	52989997	37425897	37425897	50459027	50459027
fragments_mapped	193254852	191822613	51346223	50484049	35163341	33084966	49562418	43768259
p_fragments_mapped	0.98394	0.97665	0.96898	0.95271	0.93955	0.88401	0.98223	0.8674
good_mappings	188509313	186972735	48264105	48087148	30987805	29068328	48827219	41777564
p_good_mapping	0.95978	0.95196	0.91082	0.90748	0.82798	0.77669	0.96766	0.82795
bad_mappings	4745539	4849878	3082118	2396901	4175536	4016638	735199	1990695
potential_bridges	44130	45730	13673	12363	46689	48881	8043	7647
bases_uncovered	6081125	4446226	11199129	5632937	9439425	10003408	3119764	2536653
p_bases_uncovered	0.05526	0.04785	0.13244	0.09511	0.07271	0.0784	0.06464	0.06086
contigs_uncovbase	40095	33784	55615	29248	73929	75976	12566	10673
p_contigs_uncovbase	0.47781	0.43003	0.65371	0.56981	0.55117	0.56022	0.39203	0.34379
contigs_uncovered	3445	3245	10233	4528	4475	4946	1690	1544
p_contigs_uncovered	0.04105	0.0413	0.12028	0.08822	0.03336	0.03647	0.05272	0.04973
contigs_lowcovered	31789	25006	58173	25905	76482	74573	18203	16240
p_contigs_lowcovered	0.37883	0.3183	0.68378	0.50469	0.5702	0.54988	0.56789	0.52311
contigs_segmented	9814	9637	8594	7188	8908	8570	2127	2507
p_contigs_segmented	0.11695	0.12267	0.10102	0.14004	0.06641	0.06319	0.06636	0.08075
score	0.53551	0.46978	0.36799	0.42166	0.33896	0.33023	0.59367	0.49752
optimal_score	0.58991	0.56296	0.51856	0.51135	0.47875	0.46575	0.65425	0.54439
cutoff	0.11761	0.25751	0.22736	0.12433	0.41565	0.5075	0.04244	0.28543
weighted	6.07058	6.20454	5.08525	9.51978	2.66584	2.84098	14.3598	13.0598
RMSE	21.38	22.51	24.42	25.91	26.62	28.12	24.04	22.11
Rsquared	0.63	0.62	0.58	0.46	0.49	0.43	0.43	0.52
MAE	15.47	17.16	18.25	20.3	21.54	23.68	17.55	15.94
