# Supplementary material for: Nematode gene annotation by machine-learning-assisted proteotranscriptomics enables proteome-wide evolutionary analysis
Source: HighWire-hosted journal article supplement (doi:10.1101/gr.277070.122), 2023-01-01
Supplement: Supplemental_Table_S6.xlsx [file Supplemental_Table_S6.xlsx]

## Sheet: Legend
Supplemental_Table_S6
Information on small proteins in C.elegans (GF+GG) with predicted completeness levels above 80% that are supported by at least 2 unique peptides

## Sheet: Table_S6
X.qseqid	pct_hit_len_aligned	Len	qseqid	pident.y	length.y	qlen	slen	evalue.y	Assembly
TRINITY_DN5363_c0_g1_i1.p1	100	92	SPROCEL9843	100	93	93	93	9.46e-67	GF_celegans
TRINITY_DN20304_c0_g1_i1.p1	100	83	SPROCEL9724	100	84	84	84	4.25e-59	GF_celegans
TRINITY_DN7850_c0_g1_i1.p1	100	69	SPROCEL9669	100	70	70	70	2.02e-45	GF_celegans
TRINITY_DN5659_c1_g1_i1.p2	100	95	SPROCEL9653	100	96	96	96	7.96e-69	GF_celegans
TRINITY_DN2369_c0_g1_i1.p2	100	67	SPROCEL9586	100	68	68	68	1.42e-46	GF_celegans
TRINITY_DN18190_c0_g1_i1.p2	100	82	SPROCEL9545	100	83	83	87	5.42e-54	GF_celegans
TRINITY_DN8881_c0_g1_i1.p1	100	63	SPROCEL9526	100	64	64	64	2.92e-41	GF_celegans
TRINITY_DN432_c0_g1_i1.p2	100	85	SPROCEL9454	100	86	86	86	1.16e-61	GF_celegans
TRINITY_DN24450_c0_g1_i1.p1	100	70	SPROCEL9449	100	71	71	71	2.14e-45	GF_celegans
TRINITY_DN5336_c0_g1_i1.p1	100	80	SPROCEL9447	100	81	81	81	1.94e-55	GF_celegans
TRINITY_DN901_c0_g1_i1.p1	100	84	SPROCEL9443	100	85	85	85	4.31e-60	GF_celegans
TRINITY_DN16523_c0_g1_i1.p1	100	93	SPROCEL9435	100	94	94	98	3.09e-67	GF_celegans
TRINITY_DN7976_c0_g1_i1.p1	100	95	SPROCEL9394	100	96	96	96	1.02e-69	GF_celegans
TRINITY_DN24374_c0_g1_i1.p1	100	84	SPROCEL9304	100	85	85	89	1.79e-60	GF_celegans
TRINITY_DN813_c0_g2_i2.p3	100	74	SPROCEL9248	100	75	75	75	3.08e-50	GF_celegans
TRINITY_DN22483_c0_g1_i1.p2	100	70	SPROCEL9098	100	71	71	71	8.55e-48	GF_celegans
TRINITY_DN2446_c0_g1_i1.p1	100	97	SPROCEL9050	100	98	98	98	4.65e-63	GF_celegans
TRINITY_DN22557_c0_g1_i1.p1	100	50	SPROCEL9028	100	51	51	51	6.48e-31	GF_celegans
TRINITY_DN291_c0_g3_i2.p3	100	65	SPROCEL9004	100	66	66	66	4.43e-37	GF_celegans
TRINITY_DN21963_c0_g1_i1.p3	100	68	SPROCEL8972	100	69	69	69	3.28e-44	GF_celegans
TRINITY_DN18800_c0_g1_i1.p1	100	73	SPROCEL8951	100	74	74	74	3.6e-51	GF_celegans
TRINITY_DN24454_c0_g1_i1.p2	100	79	SPROCEL8939	100	80	80	80	1.35e-54	GF_celegans
TRINITY_DN15053_c0_g1_i1.p1	100	90	SPROCEL8916	100	91	91	91	1.92e-63	GF_celegans
TRINITY_DN17028_c0_g1_i1.p2	100	64	SPROCEL8627	100	65	65	68	4.08e-44	GF_celegans
TRINITY_DN9744_c0_g1_i1.p1	100	88	SPROCEL8602	100	89	89	89	6.24e-62	GF_celegans
TRINITY_DN10579_c0_g2_i2.p5	100	90	SPROCEL8503	100	91	91	91	5.19e-65	GF_celegans
TRINITY_DN3818_c0_g2_i1.p1	100	67	SPROCEL8484	100	68	68	68	3.02e-44	GF_celegans
TRINITY_DN4553_c0_g1_i1.p1	90.7	86	SPROCEL8481	100	79	87	79	4.26e-52	GF_celegans
TRINITY_DN23104_c0_g1_i1.p2	100	77	SPROCEL8436	100	78	78	78	7.57e-54	GF_celegans
TRINITY_DN5067_c1_g1_i1.p1	100	98	SPROCEL8317	100	99	99	99	2.55e-68	GF_celegans
TRINITY_DN3565_c0_g1_i1.p1	100	82	SPROCEL8280	100	83	83	83	5.22e-52	GF_celegans
TRINITY_DN24926_c0_g1_i1.p1	100	92	SPROCEL8249	100	93	93	96	4.64e-65	GF_celegans
TRINITY_DN23343_c0_g1_i1.p1	100	78	SPROCEL8141	100	79	79	82	2.35e-54	GF_celegans
TRINITY_DN24852_c0_g1_i1.p1	100	76	SPROCEL8111	100	77	77	77	7.13e-54	GF_celegans
TRINITY_DN19228_c0_g1_i1.p1	100	69	SPROCEL8074	100	70	70	70	2.25e-46	GF_celegans
TRINITY_DN1969_c0_g2_i1.p2	100	94	SPROCEL8054	100	95	95	95	1.47e-69	GF_celegans
TRINITY_DN24424_c0_g1_i1.p1	100	85	SPROCEL7981	100	86	86	86	1.89e-59	GF_celegans
TRINITY_DN17785_c0_g1_i1.p1	100	84	SPROCEL793	100	100	100	101	2.76e-69	GF_celegans
TRINITY_DN8988_c0_g1_i1.p2	100	74	SPROCEL7667	100	75	75	75	4.16e-46	GF_celegans
TRINITY_DN3686_c0_g2_i1.p1	100	99	SPROCEL7650	100	100	100	100	5.36e-71	GF_celegans
TRINITY_DN7780_c0_g1_i1.p2	100	73	SPROCEL7630	100	74	74	74	7.6e-48	GF_celegans
TRINITY_DN7564_c0_g1_i1.p1	100	98	SPROCEL7603	100	99	99	99	1.4e-67	GF_celegans
TRINITY_DN20819_c0_g1_i1.p1	100	88	SPROCEL7535	100	89	89	89	6.96e-62	GF_celegans
TRINITY_DN8060_c0_g1_i1.p1	100	94	SPROCEL7466	100	95	95	95	1.49e-65	GF_celegans
TRINITY_DN113_c0_g2_i1.p2	100	83	SPROCEL7245	100	81	81	84	1.71e-54	GF_celegans
TRINITY_DN20771_c0_g1_i1.p1	100	95	SPROCEL7144	100	93	93	96	3.75e-66	GF_celegans
TRINITY_DN113_c0_g2_i1.p2	100	83	SPROCEL6709	100	84	86	84	6.99e-57	GF_celegans
TRINITY_DN901_c0_g1_i1.p1	100	84	SPROCEL6678	100	85	89	85	2.39e-60	GF_celegans
TRINITY_DN2446_c0_g1_i1.p1	100	97	SPROCEL6320	100	94	94	98	3.64e-60	GF_celegans
TRINITY_DN18800_c0_g1_i1.p1	100	73	SPROCEL5396	100	71	71	74	7.04e-49	GF_celegans
TRINITY_DN3818_c0_g2_i1.p1	100	67	SPROCEL5357	100	68	80	68	5.16e-44	GF_celegans
TRINITY_DN24450_c0_g1_i1.p1	100	70	SPROCEL5264	100	67	67	71	4.13e-42	GF_celegans
TRINITY_DN7703_c0_g1_i1.p1	100	90	SPROCEL5034	100	91	98	91	5.26e-63	GF_celegans
TRINITY_DN10196_c0_g1_i1.p1	100	87	SPROCEL5006	100	88	98	88	2e-61	GF_celegans
TRINITY_DN7440_c0_g1_i1.p1	100	91	SPROCEL483	100	90	90	92	7.9e-61	GF_celegans
TRINITY_DN901_c0_g1_i1.p1	100	84	SPROCEL4172	100	85	87	85	3.02e-60	GF_celegans
TRINITY_DN9744_c0_g1_i1.p1	100	88	SPROCEL3575	100	86	86	89	1.17e-59	GF_celegans
TRINITY_DN7141_c0_g1_i1.p1	100	81	SPROCEL260	100	79	79	82	8.44e-53	GF_celegans
TRINITY_DN4320_c0_g1_i1.p1	100	86	SPROCEL2443	100	85	85	87	1.54e-58	GF_celegans
TRINITY_DN1136_c0_g1_i2.p4	100	84	SPROCEL227	100	85	88	85	3.89e-53	GF_celegans
TRINITY_DN1969_c0_g2_i1.p2	100	94	SPROCEL2265	100	95	100	95	1.44e-69	GF_celegans
TRINITY_DN20819_c0_g1_i1.p1	100	88	SPROCEL20264	100	86	86	89	2.19e-59	GF_celegans
TRINITY_DN23398_c0_g1_i1.p1	100	76	SPROCEL19980	100	76	76	80	7.97e-54	GF_celegans
TRINITY_DN20304_c0_g1_i1.p1	100	83	SPROCEL19619	100	82	82	84	3.13e-57	GF_celegans
TRINITY_DN24791_c0_g1_i1.p1	100	81	SPROCEL18895	100	80	80	82	4.36e-56	GF_celegans
TRINITY_DN22973_c0_g1_i1.p2	100	83	SPROCEL18894	100	81	81	84	9.93e-57	GF_celegans
TRINITY_DN4586_c0_g1_i1.p1	100	99	SPROCEL18795	100	98	98	100	2.85e-68	GF_celegans
TRINITY_DN21014_c0_g1_i1.p1	100	82	SPROCEL18640	100	79	79	83	1.66e-55	GF_celegans
TRINITY_DN1720_c0_g1_i2.p1	100	96	SPROCEL18559	100	97	99	97	3.24e-69	GF_celegans
TRINITY_DN10481_c0_g1_i1.p1	100	68	SPROCEL18543	100	83	85	83	4.19e-57	GF_celegans
TRINITY_DN10196_c0_g1_i1.p1	100	87	SPROCEL17349	100	88	93	88	1.53e-61	GF_celegans
TRINITY_DN5274_c0_g1_i2.p1	100	97	SPROCEL17333	100	97	97	98	9.06e-68	GF_celegans
TRINITY_DN4589_c0_g1_i1.p1	100	81	SPROCEL16934	100	90	90	94	4.61e-63	GF_celegans
TRINITY_DN16481_c0_g1_i1.p1	100	89	SPROCEL16807	100	87	87	90	8.62e-61	GF_celegans
TRINITY_DN7564_c0_g1_i1.p1	100	98	SPROCEL16413	100	95	95	99	4.27e-64	GF_celegans
TRINITY_DN10196_c0_g1_i1.p1	100	87	SPROCEL16407	100	88	99	88	1.75e-61	GF_celegans
TRINITY_DN4976_c0_g1_i1.p1	100	92	SPROCEL16195	100	93	95	93	4.69e-62	GF_celegans
TRINITY_DN22557_c0_g1_i1.p1	100	50	SPROCEL15938	100	50	50	51	5.72e-30	GF_celegans
TRINITY_DN291_c0_g3_i2.p3	100	65	SPROCEL15516	100	65	65	66	2.52e-36	GF_celegans
TRINITY_DN24450_c0_g1_i1.p1	100	70	SPROCEL14959	100	71	73	71	1.77e-45	GF_celegans
TRINITY_DN18800_c0_g1_i1.p1	100	73	SPROCEL14613	100	73	73	74	2.94e-50	GF_celegans
TRINITY_DN10579_c0_g2_i2.p5	100	90	SPROCEL14092	100	87	87	91	8.3e-62	GF_celegans
TRINITY_DN15053_c0_g1_i1.p1	100	90	SPROCEL13792	100	90	90	91	2.14e-62	GF_celegans
TRINITY_DN24454_c0_g1_i1.p1	100	89	SPROCEL13429	100	90	90	90	1.08e-61	GF_celegans
TRINITY_DN23398_c0_g1_i1.p1	100	76	SPROCEL13292	100	77	77	80	9.35e-55	GF_celegans
TRINITY_DN4330_c0_g1_i1.p1	100	74	SPROCEL13131	100	75	75	78	1.01e-51	GF_celegans
TRINITY_DN3170_c0_g1_i1.p3	100	87	SPROCEL12774	100	88	88	88	3.59e-61	GF_celegans
TRINITY_DN17140_c0_g1_i1.p1	100	92	SPROCEL12699	100	93	93	96	5.41e-65	GF_celegans
TRINITY_DN113_c0_g2_i1.p2	100	83	SPROCEL12692	100	84	84	84	7.02e-57	GF_celegans
TRINITY_DN7603_c0_g1_i1.p2	100	95	SPROCEL12683	100	96	96	96	4.49e-66	GF_celegans
TRINITY_DN20469_c0_g1_i1.p1	100	85	SPROCEL12641	100	86	86	89	8.23e-63	GF_celegans
TRINITY_DN7703_c0_g1_i1.p1	100	90	SPROCEL12631	100	91	91	91	5.06e-63	GF_celegans
TRINITY_DN5827_c0_g1_i2.p1	100	80	SPROCEL12628	100	81	81	81	6.95e-55	GF_celegans
TRINITY_DN3613_c0_g1_i1.p2	100	79	SPROCEL12617	100	80	80	80	8.33e-55	GF_celegans
TRINITY_DN20888_c0_g1_i1.p1	100	94	SPROCEL12585	100	95	95	95	1.26e-64	GF_celegans
TRINITY_DN4635_c0_g1_i1.p2	100	75	SPROCEL12545	100	76	76	76	4.85e-53	GF_celegans
TRINITY_DN16868_c0_g1_i1.p3	100	89	SPROCEL12540	100	90	90	90	1.5e-64	GF_celegans
TRINITY_DN1720_c0_g1_i2.p1	100	96	SPROCEL12537	100	97	97	97	3.29e-69	GF_celegans
TRINITY_DN21014_c0_g1_i1.p1	100	82	SPROCEL12500	100	83	83	83	1.92e-58	GF_celegans
TRINITY_DN19760_c0_g1_i1.p3	100	79	SPROCEL12491	100	80	80	80	2.94e-52	GF_celegans
TRINITY_DN25192_c0_g1_i1.p2	100	85	SPROCEL12489	100	86	86	86	3.48e-60	GF_celegans
TRINITY_DN5703_c0_g1_i1.p3	100	80	SPROCEL12485	100	81	81	81	1.81e-54	GF_celegans
TRINITY_DN4976_c0_g1_i1.p1	100	92	SPROCEL12483	100	93	93	93	5.55e-62	GF_celegans
TRINITY_DN7141_c0_g1_i1.p1	100	81	SPROCEL12447	100	82	82	82	5.99e-55	GF_celegans
TRINITY_DN4560_c0_g1_i1.p1	100	97	SPROCEL12439	100	98	98	98	9.36e-71	GF_celegans
TRINITY_DN4586_c0_g1_i1.p1	100	99	SPROCEL12431	100	100	100	100	7e-70	GF_celegans
TRINITY_DN4283_c0_g1_i1.p2	100	82	SPROCEL12413	100	83	83	83	1.13e-53	GF_celegans
TRINITY_DN1969_c0_g1_i1.p3	100	78	SPROCEL12409	100	79	79	79	1.47e-53	GF_celegans
TRINITY_DN15264_c0_g1_i1.p1	100	80	SPROCEL12401	100	81	81	81	1.3e-54	GF_celegans
TRINITY_DN16481_c0_g1_i1.p1	100	89	SPROCEL12226	100	90	90	90	1.13e-63	GF_celegans
TRINITY_DN22749_c0_g1_i1.p1	100	99	SPROCEL12195	100	100	100	104	1.62e-70	GF_celegans
TRINITY_DN24791_c0_g1_i1.p1	100	81	SPROCEL12164	100	79	79	82	2.62e-55	GF_celegans
TRINITY_DN429_c0_g1_i2.p1	100	90	SPROCEL12079	100	91	91	91	3.78e-65	GF_celegans
TRINITY_DN18280_c0_g1_i1.p2	100	90	SPROCEL12077	100	91	91	95	1.26e-65	GF_celegans
TRINITY_DN6257_c0_g1_i1.p1	100	89	SPROCEL12066	100	90	90	90	9.33e-65	GF_celegans
TRINITY_DN7780_c0_g1_i1.p1	100	79	SPROCEL12023	100	80	80	80	2.08e-50	GF_celegans
TRINITY_DN22973_c0_g1_i1.p2	100	83	SPROCEL12022	100	80	80	84	5.96e-56	GF_celegans
TRINITY_DN15785_c0_g1_i1.p3	100	54	SPROCEL11886	100	55	55	59	6.33e-35	GF_celegans
TRINITY_DN1488_c0_g1_i1.p1	100	73	SPROCEL11877	100	74	74	78	2.37e-50	GF_celegans
TRINITY_DN20580_c0_g1_i1.p1	100	68	SPROCEL11709	100	69	69	73	1.75e-47	GF_celegans
TRINITY_DN21438_c0_g1_i1.p2	100	99	SPROCEL11679	100	100	100	100	3.99e-74	GF_celegans
TRINITY_DN10196_c0_g1_i1.p1	100	87	SPROCEL11676	100	88	88	88	1.18e-61	GF_celegans
TRINITY_DN1788_c0_g2_i2.p1	100	96	SPROCEL11645	100	97	97	101	1.19e-66	GF_celegans
TRINITY_DN6597_c0_g1_i1.p1	100	72	SPROCEL11642	100	73	73	73	7.02e-50	GF_celegans
TRINITY_DN20771_c0_g1_i1.p1	100	95	SPROCEL11611	100	96	96	96	2.07e-68	GF_celegans
TRINITY_DN3002_c0_g1_i1.p2	100	84	SPROCEL11469	100	85	85	85	4.79e-61	GF_celegans
TRINITY_DN24791_c0_g1_i1.p1	100	81	SPROCEL11450	100	82	82	82	1.8e-57	GF_celegans
TRINITY_DN4635_c0_g1_i1.p2	100	75	SPROCEL1144	100	72	72	76	6.57e-50	GF_celegans
TRINITY_DN814_c0_g1_i3.p1	100	84	SPROCEL11422	100	85	85	85	8.42e-57	GF_celegans
TRINITY_DN404_c0_g2_i1.p3	100	57	SPROCEL11356	100	58	58	58	4.42e-35	GF_celegans
TRINITY_DN22572_c0_g1_i1.p2	100	73	SPROCEL11347	100	74	74	74	1.25e-49	GF_celegans
TRINITY_DN65_c0_g2_i2.p3	100	86	SPROCEL11307	100	87	87	87	2.27e-62	GF_celegans
TRINITY_DN7643_c0_g1_i2.p1	100	82	SPROCEL11305	100	83	83	83	4.12e-57	GF_celegans
TRINITY_DN24450_c0_g1_i1.p1	100	70	SPROCEL1127	100	69	69	71	2.12e-43	GF_celegans
TRINITY_DN7145_c0_g1_i1.p1	100	96	SPROCEL11252	100	97	97	97	3.6e-65	GF_celegans
TRINITY_DN4320_c0_g1_i1.p1	100	86	SPROCEL11246	100	87	87	87	7.23e-60	GF_celegans
TRINITY_DN988_c0_g1_i1.p1	100	96	SPROCEL11214	100	97	97	97	2.9e-68	GF_celegans
TRINITY_DN5012_c0_g1_i2.p4	100	79	SPROCEL11205	100	80	80	80	3.03e-58	GF_celegans
TRINITY_DN18794_c0_g1_i1.p1	100	91	SPROCEL11204	100	92	92	92	3.57e-64	GF_celegans
TRINITY_DN25098_c0_g1_i1.p1	100	92	SPROCEL11201	100	93	93	93	7.24e-65	GF_celegans
TRINITY_DN2259_c0_g2_i1.p1	100	90	SPROCEL11200	100	91	91	91	1.04e-57	GF_celegans
TRINITY_DN4141_c0_g1_i1.p1	100	76	SPROCEL11191	100	77	77	81	9.49e-53	GF_celegans
TRINITY_DN18399_c0_g1_i1.p1	100	92	SPROCEL11184	100	93	93	96	2.71e-65	GF_celegans
TRINITY_DN15766_c0_g1_i1.p2	100	62	SPROCEL11163	100	63	63	63	2.04e-39	GF_celegans
TRINITY_DN7440_c0_g1_i1.p1	100	91	SPROCEL11161	100	92	92	92	2.32e-62	GF_celegans
TRINITY_DN24709_c0_g1_i1.p1	100	98	SPROCEL11138	100	99	99	103	5.58e-72	GF_celegans
TRINITY_DN6929_c0_g1_i1.p2	100	78	SPROCEL11115	100	79	79	83	4.09e-55	GF_celegans
TRINITY_DN1136_c0_g1_i2.p4	100	84	SPROCEL11111	100	85	85	85	3.71e-53	GF_celegans
TRINITY_DN1136_c0_g1_i2.p4	100	84	SPROCEL11110	100	85	85	85	3.71e-53	GF_celegans
TRINITY_DN2730_c0_g1_i2.p1	100	91	SPROCEL11072	100	92	92	92	4.72e-63	GF_celegans
TRINITY_DN19907_c0_g1_i1.p1	100	87	SPROCEL10858	100	88	88	88	9.65e-64	GF_celegans
TRINITY_DN6943_c0_g2_i1.p2	100	62	SPROCEL10848	100	63	63	63	1.19e-41	GF_celegans
TRINITY_DN6649_c0_g1_i1.p1	100	93	SPROCEL10770	100	94	94	94	3.05e-63	GF_celegans
TRINITY_DN17662_c0_g1_i1.p1	100	65	SPROCEL1076	100	64	64	66	1.79e-40	GF_celegans
TRINITY_DN24834_c0_g1_i1.p1	100	62	SPROCEL10679	100	63	63	67	7.57e-43	GF_celegans
TRINITY_DN17662_c0_g1_i1.p1	100	65	SPROCEL10586	100	66	66	66	1.91e-42	GF_celegans
TRINITY_DN7270_c0_g1_i1.p1	100	88	SPROCEL10417	100	89	89	89	8.39e-62	GF_celegans
TRINITY_DN4553_c0_g1_i1.p1	90.7	86	SPROCEL10221	100	79	79	79	6.88e-52	GF_celegans
TRINITY_DN5274_c0_g1_i2.p1	100	97	SPROCEL10213	100	98	98	98	1.17e-68	GF_celegans
TRINITY_DN7780_c0_g1_i1.p1	100	79	SPROCEL1019	100	76	76	80	3.96e-47	GF_celegans
TRINITY_DN21228_c0_g1_i1.p2	100	88	SPROCEL10152	100	89	89	93	8.44e-61	GF_celegans
TRINITY_DN12829_c0_g1_i1.p1	100	94	NA	NA	NA	NA	NA	NA	GF_celegans
TRINITY_DN8419_c0_g2_i1.p1	100	73	NA	NA	NA	NA	NA	NA	GF_celegans
TRINITY_DN25054_c0_g1_i1.p1	100	78	NA	NA	NA	NA	NA	NA	GF_celegans
TRINITY_DN15431_c0_g1_i1.p2	100	50	NA	NA	NA	NA	NA	NA	GF_celegans
TRINITY_DN10348_c0_g1_i1.p1	100	75	NA	NA	NA	NA	NA	NA	GF_celegans
TRINITY_DN20092_c0_g1_i1.p2	100	59	NA	NA	NA	NA	NA	NA	GF_celegans
TRINITY_DN291_c0_g4_i1.p2	100	72	NA	NA	NA	NA	NA	NA	GF_celegans
TRINITY_DN291_c0_g3_i1.p1	100	73	NA	NA	NA	NA	NA	NA	GF_celegans
TRINITY_DN291_c0_g1_i1.p2	100	69	NA	NA	NA	NA	NA	NA	GF_celegans
TRINITY_DN24677_c0_g1_i1.p3	100	75	NA	NA	NA	NA	NA	NA	GF_celegans
TRINITY_DN18429_c0_g1_i1.p1	100	82	NA	NA	NA	NA	NA	NA	GF_celegans
TRINITY_DN21457_c0_g1_i1.p1	100	69	NA	NA	NA	NA	NA	NA	GF_celegans
TRINITY_DN20185_c0_g1_i1.p1	100	95	NA	NA	NA	NA	NA	NA	GF_celegans
TRINITY_DN1029_c0_g1_i2.p7	100	66	NA	NA	NA	NA	NA	NA	GF_celegans
TRINITY_DN1029_c0_g1_i5.p5	100	74	NA	NA	NA	NA	NA	NA	GF_celegans
TRINITY_DN5281_c0_g1_i1.p1	100	86	NA	NA	NA	NA	NA	NA	GF_celegans
TRINITY_DN17821_c0_g1_i1.p1	100	67	NA	NA	NA	NA	NA	NA	GF_celegans
TRINITY_DN4551_c0_g1_i1.p1	100	91	NA	NA	NA	NA	NA	NA	GF_celegans
TRINITY_DN15920_c0_g1_i1.p1	100	64	NA	NA	NA	NA	NA	NA	GF_celegans
TRINITY_DN16246_c0_g1_i1.p1	100	85	NA	NA	NA	NA	NA	NA	GF_celegans
TRINITY_DN3138_c0_g1_i1.p1	100	62	NA	NA	NA	NA	NA	NA	GF_celegans
TRINITY_DN8603_c0_g1_i1.p1	100	78	NA	NA	NA	NA	NA	NA	GF_celegans
TRINITY_DN2142_c0_g1_i1.p1	100	75	NA	NA	NA	NA	NA	NA	GF_celegans
TRINITY_DN2142_c0_g1_i2.p2	100	72	NA	NA	NA	NA	NA	NA	GF_celegans
TRINITY_DN17157_c0_g1_i1.p2	100	75	NA	NA	NA	NA	NA	NA	GF_celegans
TRINITY_DN17954_c0_g1_i1.p1	100	89	NA	NA	NA	NA	NA	NA	GF_celegans
TRINITY_DN279_c0_g1_i3.p1	100	79	NA	NA	NA	NA	NA	NA	GF_celegans
TRINITY_DN279_c0_g1_i2.p1	100	79	NA	NA	NA	NA	NA	NA	GF_celegans
TRINITY_DN279_c0_g1_i4.p2	100	79	NA	NA	NA	NA	NA	NA	GF_celegans
TRINITY_DN279_c0_g1_i1.p2	100	79	NA	NA	NA	NA	NA	NA	GF_celegans
TRINITY_DN15219_c0_g1_i1.p1	100	71	NA	NA	NA	NA	NA	NA	GF_celegans
TRINITY_DN22800_c0_g1_i1.p1	100	82	NA	NA	NA	NA	NA	NA	GF_celegans
TRINITY_DN499_c0_g5_i1.p2	100	70	NA	NA	NA	NA	NA	NA	GF_celegans
TRINITY_DN499_c0_g1_i1.p4	100	66	NA	NA	NA	NA	NA	NA	GF_celegans
TRINITY_DN12991_c0_g1_i1.p1	100	95	NA	NA	NA	NA	NA	NA	GF_celegans
TRINITY_DN23053_c0_g1_i1.p1	100	75	NA	NA	NA	NA	NA	NA	GF_celegans
TRINITY_DN16101_c0_g1_i1.p1	100	92	NA	NA	NA	NA	NA	NA	GF_celegans
TRINITY_DN7286_c0_g1_i1.p1	100	90	NA	NA	NA	NA	NA	NA	GF_celegans
TRINITY_DN6289_c0_g1_i1.p1	100	97	NA	NA	NA	NA	NA	NA	GF_celegans
TRINITY_DN25562_c0_g1_i1.p1	100	65	NA	NA	NA	NA	NA	NA	GF_celegans
TRINITY_DN17081_c0_g1_i1.p1	100	59	NA	NA	NA	NA	NA	NA	GF_celegans
TRINITY_DN2981_c0_g1_i1.p1	100	71	NA	NA	NA	NA	NA	NA	GF_celegans
TRINITY_DN25761_c0_g1_i1.p1	100	93	NA	NA	NA	NA	NA	NA	GF_celegans
TRINITY_DN8225_c0_g1_i2.p1	100	84	NA	NA	NA	NA	NA	NA	GF_celegans
TRINITY_DN3163_c0_g1_i2.p1	100	96	NA	NA	NA	NA	NA	NA	GF_celegans
TRINITY_DN3163_c0_g1_i3.p1	100	87	NA	NA	NA	NA	NA	NA	GF_celegans
TRINITY_DN4397_c0_g1_i3.p1	100	64	NA	NA	NA	NA	NA	NA	GF_celegans
TRINITY_DN23376_c0_g1_i1.p1	100	67	NA	NA	NA	NA	NA	NA	GF_celegans
TRINITY_DN18694_c0_g1_i1.p1	100	99	NA	NA	NA	NA	NA	NA	GF_celegans
TRINITY_DN8368_c0_g1_i1.p1	100	34	NA	NA	NA	NA	NA	NA	GF_celegans
TRINITY_DN757_c0_g2_i1.p16	100	23	NA	NA	NA	NA	NA	NA	GF_celegans
TRINITY_DN9252_c0_g1_i1.p1	100	93	NA	NA	NA	NA	NA	NA	GF_celegans
TRINITY_DN19165_c0_g1_i1.p2	100	78	NA	NA	NA	NA	NA	NA	GF_celegans
TRINITY_DN9117_c0_g1_i1.p1	100	66	NA	NA	NA	NA	NA	NA	GF_celegans
TRINITY_DN17252_c0_g1_i1.p2	100	55	NA	NA	NA	NA	NA	NA	GF_celegans
TRINITY_DN11701_c0_g5_i1.p2	100	24	NA	NA	NA	NA	NA	NA	GF_celegans
TRINITY_DN22720_c0_g1_i1.p1	100	74	NA	NA	NA	NA	NA	NA	GF_celegans
TRINITY_DN4212_c0_g1_i2.p2	100	65	NA	NA	NA	NA	NA	NA	GF_celegans
TRINITY_DN6697_c0_g1_i1.p2	100	38	NA	NA	NA	NA	NA	NA	GF_celegans
TRINITY_DN3597_c0_g1_i1.p2	100	83	NA	NA	NA	NA	NA	NA	GF_celegans
TRINITY_DN9011_c0_g1_i2.p1	100	85	NA	NA	NA	NA	NA	NA	GF_celegans
TRINITY_DN577_c0_g1_i7.p2	100	73	NA	NA	NA	NA	NA	NA	GF_celegans
TRINITY_DN577_c0_g1_i6.p1	100	73	NA	NA	NA	NA	NA	NA	GF_celegans
TRINITY_DN16346_c0_g1_i1.p1	100	92	NA	NA	NA	NA	NA	NA	GF_celegans
TRINITY_DN22637_c0_g1_i1.p1	100	60	NA	NA	NA	NA	NA	NA	GF_celegans
TRINITY_DN16586_c0_g1_i1.p2	100	82	NA	NA	NA	NA	NA	NA	GF_celegans
TRINITY_DN17489_c0_g1_i1.p1	100	95	NA	NA	NA	NA	NA	NA	GF_celegans
TRINITY_DN118_c0_g1_i2.p2	100	59	NA	NA	NA	NA	NA	NA	GF_celegans
TRINITY_DN10648_c0_g1_i2.p1	100	69	NA	NA	NA	NA	NA	NA	GF_celegans
TRINITY_DN22025_c0_g1_i1.p1	100	70	NA	NA	NA	NA	NA	NA	GF_celegans
TRINITY_DN12178_c0_g1_i1.p2	100	61	NA	NA	NA	NA	NA	NA	GF_celegans
TRINITY_DN17928_c0_g1_i1.p1	100	86	NA	NA	NA	NA	NA	NA	GF_celegans
TRINITY_DN4066_c0_g1_i2.p1	100	75	NA	NA	NA	NA	NA	NA	GF_celegans
TRINITY_DN3804_c0_g1_i1.p1	100	93	NA	NA	NA	NA	NA	NA	GF_celegans
TRINITY_DN5235_c0_g1_i1.p1	100	66	NA	NA	NA	NA	NA	NA	GF_celegans
TRINITY_DN6926_c0_g2_i1.p3	100	50	NA	NA	NA	NA	NA	NA	GF_celegans
TRINITY_DN18350_c0_g1_i1.p1	100	69	NA	NA	NA	NA	NA	NA	GF_celegans
TRINITY_DN1488_c0_g1_i2.p1	100	73	NA	NA	NA	NA	NA	NA	GF_celegans
TRINITY_DN900_c0_g1_i6.p1	100	71	NA	NA	NA	NA	NA	NA	GF_celegans
TRINITY_DN6634_c0_g1_i1.p1	100	95	NA	NA	NA	NA	NA	NA	GF_celegans
TRINITY_DN20808_c0_g1_i1.p2	100	67	NA	NA	NA	NA	NA	NA	GF_celegans
TRINITY_DN3387_c0_g1_i1.p3	100	64	NA	NA	NA	NA	NA	NA	GF_celegans
TRINITY_DN1092_c0_g1_i2.p1	100	91	NA	NA	NA	NA	NA	NA	GF_celegans
TRINITY_DN15395_c0_g1_i1.p1	100	94	NA	NA	NA	NA	NA	NA	GF_celegans
TRINITY_DN1092_c0_g2_i1.p1	100	88	NA	NA	NA	NA	NA	NA	GF_celegans
TRINITY_DN16222_c0_g1_i1.p2	100	89	NA	NA	NA	NA	NA	NA	GF_celegans
TRINITY_DN15007_c0_g1_i1.p2	100	66	NA	NA	NA	NA	NA	NA	GF_celegans
TRINITY_DN18926_c0_g1_i1.p1	100	51	NA	NA	NA	NA	NA	NA	GF_celegans
TRINITY_DN1946_c0_g1_i1.p1	100	96	NA	NA	NA	NA	NA	NA	GF_celegans
TRINITY_DN17923_c0_g1_i1.p1	100	76	NA	NA	NA	NA	NA	NA	GF_celegans
TRINITY_DN23289_c0_g1_i1.p1	100	56	NA	NA	NA	NA	NA	NA	GF_celegans
TRINITY_DN15683_c0_g1_i1.p1	100	70	NA	NA	NA	NA	NA	NA	GF_celegans
TRINITY_DN25114_c0_g1_i1.p1	100	96	NA	NA	NA	NA	NA	NA	GF_celegans
TRINITY_DN4806_c0_g1_i1.p1	100	73	NA	NA	NA	NA	NA	NA	GF_celegans
TRINITY_DN20159_c0_g1_i1.p1	100	60	NA	NA	NA	NA	NA	NA	GF_celegans
TRINITY_DN20852_c0_g1_i1.p1	100	60	NA	NA	NA	NA	NA	NA	GF_celegans
TRINITY_DN25783_c0_g1_i1.p1	100	71	NA	NA	NA	NA	NA	NA	GF_celegans
TRINITY_DN24264_c0_g1_i1.p1	100	61	NA	NA	NA	NA	NA	NA	GF_celegans
TRINITY_DN6302_c0_g1_i1.p2	100	68	NA	NA	NA	NA	NA	NA	GF_celegans
TRINITY_DN3855_c0_g1_i1.p2	100	74	NA	NA	NA	NA	NA	NA	GF_celegans
TRINITY_DN530_c0_g1_i1.p1	100	92	NA	NA	NA	NA	NA	NA	GF_celegans
TRINITY_DN5677_c0_g2_i1.p2	100	72	NA	NA	NA	NA	NA	NA	GF_celegans
TRINITY_DN22861_c0_g1_i1.p3	100	59	NA	NA	NA	NA	NA	NA	GF_celegans
TRINITY_DN15058_c0_g1_i1.p1	100	84	NA	NA	NA	NA	NA	NA	GF_celegans
TRINITY_DN20338_c0_g1_i1.p1	100	41	NA	NA	NA	NA	NA	NA	GF_celegans
TRINITY_DN22549_c0_g1_i1.p1	100	68	NA	NA	NA	NA	NA	NA	GF_celegans
TRINITY_DN22347_c0_g1_i1.p2	100	99	NA	NA	NA	NA	NA	NA	GF_celegans
TRINITY_DN22339_c0_g1_i1.p1	100	97	NA	NA	NA	NA	NA	NA	GF_celegans
TRINITY_DN10718_c0_g2_i1.p1	100	79	NA	NA	NA	NA	NA	NA	GF_celegans
TRINITY_DN10718_c0_g3_i1.p1	100	89	NA	NA	NA	NA	NA	NA	GF_celegans
TRINITY_DN12997_c0_g1_i1.p1	100	68	NA	NA	NA	NA	NA	NA	GF_celegans
TRINITY_DN7707_c0_g1_i1.p1	100	72	NA	NA	NA	NA	NA	NA	GF_celegans
TRINITY_DN1497_c0_g1_i2.p3	100	43	NA	NA	NA	NA	NA	NA	GF_celegans
TRINITY_DN9802_c0_g1_i1.p1	100	72	NA	NA	NA	NA	NA	NA	GF_celegans
TRINITY_DN23326_c0_g1_i1.p1	100	74	NA	NA	NA	NA	NA	NA	GF_celegans
TRINITY_DN24027_c0_g1_i1.p2	100	62	NA	NA	NA	NA	NA	NA	GF_celegans
TRINITY_DN14746_c0_g1_i1.p1	100	86	NA	NA	NA	NA	NA	NA	GF_celegans
TRINITY_DN9216_c0_g1_i1.p1	100	83	NA	NA	NA	NA	NA	NA	GF_celegans
TRINITY_DN3131_c0_g1_i1.p1	100	86	NA	NA	NA	NA	NA	NA	GF_celegans
TRINITY_DN11206_c0_g2_i1.p1	100	89	NA	NA	NA	NA	NA	NA	GF_celegans
TRINITY_DN18856_c0_g1_i1.p1	100	72	NA	NA	NA	NA	NA	NA	GF_celegans
TRINITY_DN2427_c0_g1_i1.p1	100	93	NA	NA	NA	NA	NA	NA	GF_celegans
TRINITY_DN13734_c0_g1_i1.p1	100	83	NA	NA	NA	NA	NA	NA	GF_celegans
TRINITY_DN104_c0_g1_i3.p1	100	74	NA	NA	NA	NA	NA	NA	GF_celegans
TRINITY_DN20529_c0_g1_i1.p1	100	93	NA	NA	NA	NA	NA	NA	GF_celegans
TRINITY_DN830_c0_g1_i2.p2	100	75	NA	NA	NA	NA	NA	NA	GF_celegans
TRINITY_DN15236_c0_g1_i1.p1	100	78	NA	NA	NA	NA	NA	NA	GF_celegans
TRINITY_DN25276_c0_g1_i1.p2	100	61	NA	NA	NA	NA	NA	NA	GF_celegans
TRINITY_DN21479_c0_g1_i1.p2	100	58	NA	NA	NA	NA	NA	NA	GF_celegans
TRINITY_DN4676_c0_g1_i2.p1	100	86	NA	NA	NA	NA	NA	NA	GF_celegans
TRINITY_DN16376_c0_g1_i1.p1	100	99	NA	NA	NA	NA	NA	NA	GF_celegans
TRINITY_DN546_c1_g1_i1.p4	100	62	NA	NA	NA	NA	NA	NA	GF_celegans
TRINITY_DN14269_c0_g1_i1.p2	100	85	NA	NA	NA	NA	NA	NA	GF_celegans
TRINITY_DN19783_c0_g1_i1.p1	100	92	NA	NA	NA	NA	NA	NA	GF_celegans
TRINITY_DN577_c0_g1_i4.p1	100	74	NA	NA	NA	NA	NA	NA	GF_celegans
TRINITY_DN577_c0_g1_i2.p1	100	74	NA	NA	NA	NA	NA	NA	GF_celegans
TRINITY_DN1756_c0_g1_i1.p1	100	42	NA	NA	NA	NA	NA	NA	GF_celegans
TRINITY_DN13343_c0_g1_i1.p1	100	84	NA	NA	NA	NA	NA	NA	GF_celegans
TRINITY_DN5324_c0_g1_i4.p1	100	73	NA	NA	NA	NA	NA	NA	GF_celegans
TRINITY_DN18508_c0_g1_i1.p1	100	88	NA	NA	NA	NA	NA	NA	GF_celegans
TRINITY_DN21181_c0_g1_i1.p1	100	76	NA	NA	NA	NA	NA	NA	GF_celegans
TRINITY_DN21171_c0_g1_i1.p1	100	79	NA	NA	NA	NA	NA	NA	GF_celegans
TRINITY_DN11583_c0_g1_i1.p1	100	91	NA	NA	NA	NA	NA	NA	GF_celegans
TRINITY_DN23313_c0_g1_i1.p1	100	71	NA	NA	NA	NA	NA	NA	GF_celegans
TRINITY_DN10713_c0_g1_i1.p2	100	80	NA	NA	NA	NA	NA	NA	GF_celegans
TRINITY_DN14290_c0_g1_i1.p1	100	98	NA	NA	NA	NA	NA	NA	GF_celegans
TRINITY_DN23963_c0_g1_i1.p1	100	56	NA	NA	NA	NA	NA	NA	GF_celegans
TRINITY_DN9080_c0_g1_i1.p2	100	54	NA	NA	NA	NA	NA	NA	GF_celegans
TRINITY_DN5245_c0_g1_i1.p1	100	82	NA	NA	NA	NA	NA	NA	GF_celegans
TRINITY_DN18805_c0_g1_i1.p1	100	99	NA	NA	NA	NA	NA	NA	GF_celegans
TRINITY_DN10360_c0_g1_i1.p2	100	87	NA	NA	NA	NA	NA	NA	GF_celegans
TRINITY_DN57_c0_g1_i1.p15	100	26	NA	NA	NA	NA	NA	NA	GF_celegans
TRINITY_DN5059_c0_g1_i2.p2	100	63	NA	NA	NA	NA	NA	NA	GF_celegans
TRINITY_DN18629_c0_g1_i1.p1	100	78	NA	NA	NA	NA	NA	NA	GF_celegans
TRINITY_DN446_c0_g1_i2.p1	100	90	NA	NA	NA	NA	NA	NA	GF_celegans
TRINITY_DN23102_c0_g1_i1.p1	100	88	NA	NA	NA	NA	NA	NA	GF_celegans
TRINITY_DN23099_c0_g1_i1.p1	100	95	NA	NA	NA	NA	NA	NA	GF_celegans
TRINITY_DN10419_c0_g1_i1.p1	100	95	NA	NA	NA	NA	NA	NA	GF_celegans
TRINITY_DN3129_c0_g1_i1.p1	100	73	NA	NA	NA	NA	NA	NA	GF_celegans
TRINITY_DN24107_c0_g1_i1.p2	100	67	NA	NA	NA	NA	NA	NA	GF_celegans
TRINITY_DN9244_c0_g1_i1.p1	100	94	NA	NA	NA	NA	NA	NA	GF_celegans
TRINITY_DN20758_c0_g1_i1.p1	100	75	NA	NA	NA	NA	NA	NA	GF_celegans
TRINITY_DN16079_c0_g1_i1.p1	100	96	NA	NA	NA	NA	NA	NA	GF_celegans
TRINITY_DN10622_c0_g1_i1.p1	100	89	NA	NA	NA	NA	NA	NA	GF_celegans
TRINITY_DN8457_c0_g1_i2.p1	100	93	NA	NA	NA	NA	NA	NA	GF_celegans
TRINITY_DN8457_c0_g1_i1.p1	100	87	NA	NA	NA	NA	NA	NA	GF_celegans
TRINITY_DN3746_c0_g1_i4.p2	100	71	NA	NA	NA	NA	NA	NA	GF_celegans
TRINITY_DN3746_c0_g1_i3.p1	100	96	NA	NA	NA	NA	NA	NA	GF_celegans
TRINITY_DN23113_c0_g1_i1.p1	100	53	NA	NA	NA	NA	NA	NA	GF_celegans
TRINITY_DN15469_c0_g1_i1.p1	100	66	NA	NA	NA	NA	NA	NA	GF_celegans
TRINITY_DN5002_c0_g1_i1.p1	100	54	NA	NA	NA	NA	NA	NA	GF_celegans
TRINITY_DN25653_c0_g1_i1.p1	100	72	NA	NA	NA	NA	NA	NA	GF_celegans
TRINITY_DN18817_c0_g1_i1.p1	100	90	NA	NA	NA	NA	NA	NA	GF_celegans
TRINITY_DN22047_c0_g1_i1.p1	100	79	NA	NA	NA	NA	NA	NA	GF_celegans
TRINITY_DN24769_c0_g1_i1.p1	100	72	NA	NA	NA	NA	NA	NA	GF_celegans
TRINITY_DN279_c0_g2_i1.p1	100	86	NA	NA	NA	NA	NA	NA	GF_celegans
TRINITY_DN5563_c0_g1_i2.p1	100	89	NA	NA	NA	NA	NA	NA	GF_celegans
TRINITY_DN17178_c0_g1_i1.p1	100	85	NA	NA	NA	NA	NA	NA	GF_celegans
TRINITY_DN4241_c0_g2_i1.p2	100	57	NA	NA	NA	NA	NA	NA	GF_celegans
TRINITY_DN695_c0_g1_i4.p2	100	66	NA	NA	NA	NA	NA	NA	GF_celegans
TRINITY_DN9009_c0_g1_i1.p1	100	71	NA	NA	NA	NA	NA	NA	GF_celegans
TRINITY_DN1788_c0_g2_i1.p1	100	91	NA	NA	NA	NA	NA	NA	GF_celegans
TRINITY_DN2938_c0_g1_i1.p2	100	88	NA	NA	NA	NA	NA	NA	GF_celegans
TRINITY_DN19154_c0_g1_i1.p1	100	79	NA	NA	NA	NA	NA	NA	GF_celegans
TRINITY_DN8197_c0_g2_i1.p1	100	58	NA	NA	NA	NA	NA	NA	GF_celegans
TRINITY_DN23504_c0_g1_i1.p1	100	89	NA	NA	NA	NA	NA	NA	GF_celegans
TRINITY_DN23812_c0_g1_i1.p1	100	73	NA	NA	NA	NA	NA	NA	GF_celegans
TRINITY_DN17002_c0_g1_i1.p1	100	85	NA	NA	NA	NA	NA	NA	GF_celegans
TRINITY_DN12965_c0_g1_i2.p1	100	99	NA	NA	NA	NA	NA	NA	GF_celegans
TRINITY_DN10007_c0_g1_i2.p1	100	88	NA	NA	NA	NA	NA	NA	GF_celegans
TRINITY_DN10396_c0_g1_i1.p2	100	46	NA	NA	NA	NA	NA	NA	GF_celegans
TRINITY_DN6415_c0_g1_i1.p1	100	92	NA	NA	NA	NA	NA	NA	GF_celegans
TRINITY_DN18173_c0_g1_i1.p1	100	67	NA	NA	NA	NA	NA	NA	GF_celegans
TRINITY_DN17236_c0_g1_i1.p1	100	72	NA	NA	NA	NA	NA	NA	GF_celegans
TRINITY_DN1671_c1_g2_i1.p2	100	69	NA	NA	NA	NA	NA	NA	GF_celegans
TRINITY_DN24618_c0_g1_i1.p2	100	91	NA	NA	NA	NA	NA	NA	GF_celegans
TRINITY_DN13380_c0_g1_i2.p1	100	76	NA	NA	NA	NA	NA	NA	GF_celegans
TRINITY_DN585_c0_g1_i1.p3	100	85	NA	NA	NA	NA	NA	NA	GF_celegans
TRINITY_DN3254_c0_g4_i4.p1	100	90	NA	NA	NA	NA	NA	NA	GF_celegans
TRINITY_DN22479_c0_g1_i1.p1	100	91	NA	NA	NA	NA	NA	NA	GF_celegans
TRINITY_DN122_c0_g3_i1.p1	100	90	NA	NA	NA	NA	NA	NA	GF_celegans
TRINITY_DN122_c0_g1_i1.p1	100	89	NA	NA	NA	NA	NA	NA	GF_celegans
TRINITY_DN122_c0_g2_i1.p1	100	89	NA	NA	NA	NA	NA	NA	GF_celegans
TRINITY_DN11315_c0_g1_i4.p8	100	41	NA	NA	NA	NA	NA	NA	GF_celegans
TRINITY_DN3550_c0_g1_i1.p1	100	46	NA	NA	NA	NA	NA	NA	GF_celegans
TRINITY_DN2885_c1_g2_i1.p1	100	90	NA	NA	NA	NA	NA	NA	GF_celegans
TRINITY_DN4656_c0_g2_i2.p2	100	44	NA	NA	NA	NA	NA	NA	GF_celegans
TRINITY_DN18392_c0_g1_i1.p1	100	90	NA	NA	NA	NA	NA	NA	GF_celegans
TRINITY_DN961_c0_g1_i3.p1	100	98	NA	NA	NA	NA	NA	NA	GF_celegans
TRINITY_DN7489_c0_g1_i1.p2	100	56	NA	NA	NA	NA	NA	NA	GF_celegans
TRINITY_DN8810_c0_g1_i1.p1	100	85	NA	NA	NA	NA	NA	NA	GF_celegans
TRINITY_DN8097_c0_g1_i1.p2	100	79	NA	NA	NA	NA	NA	NA	GF_celegans
TRINITY_DN22838_c0_g1_i1.p3	100	62	NA	NA	NA	NA	NA	NA	GF_celegans
TRINITY_DN8617_c0_g1_i1.p1	100	75	NA	NA	NA	NA	NA	NA	GF_celegans
TRINITY_DN10031_c0_g1_i1.p1	100	59	NA	NA	NA	NA	NA	NA	GF_celegans
TRINITY_DN2100_c0_g1_i1.p1	100	85	NA	NA	NA	NA	NA	NA	GF_celegans
TRINITY_DN16829_c0_g1_i1.p1	100	96	NA	NA	NA	NA	NA	NA	GF_celegans
TRINITY_DN318_c0_g1_i1.p3	100	75	NA	NA	NA	NA	NA	NA	GF_celegans
TRINITY_DN318_c0_g1_i2.p3	100	72	NA	NA	NA	NA	NA	NA	GF_celegans
TRINITY_DN25039_c0_g1_i1.p3	100	61	NA	NA	NA	NA	NA	NA	GF_celegans
TRINITY_DN2787_c0_g1_i1.p1	100	62	NA	NA	NA	NA	NA	NA	GF_celegans
TRINITY_DN22760_c0_g1_i1.p1	100	66	NA	NA	NA	NA	NA	NA	GF_celegans
TRINITY_DN843_c0_g2_i1.p2	100	71	NA	NA	NA	NA	NA	NA	GF_celegans
TRINITY_DN18871_c0_g1_i1.p2	100	85	NA	NA	NA	NA	NA	NA	GF_celegans
TRINITY_DN15180_c0_g1_i1.p2	100	75	NA	NA	NA	NA	NA	NA	GF_celegans
TRINITY_DN9135_c0_g1_i2.p1	100	84	NA	NA	NA	NA	NA	NA	GF_celegans
TRINITY_DN9890_c0_g1_i1.p1	100	78	NA	NA	NA	NA	NA	NA	GF_celegans
TRINITY_DN18138_c0_g1_i1.p1	100	95	NA	NA	NA	NA	NA	NA	GF_celegans
TRINITY_DN16753_c0_g1_i1.p1	100	84	NA	NA	NA	NA	NA	NA	GF_celegans
TRINITY_DN22062_c0_g1_i1.p1	100	95	NA	NA	NA	NA	NA	NA	GF_celegans
TRINITY_DN1424_c0_g1_i1.p2	100	84	NA	NA	NA	NA	NA	NA	GF_celegans
TRINITY_DN21012_c0_g1_i1.p1	100	95	NA	NA	NA	NA	NA	NA	GF_celegans
TRINITY_DN7757_c0_g1_i1.p1	100	70	NA	NA	NA	NA	NA	NA	GF_celegans
TRINITY_DN11488_c0_g2_i1.p2	100	58	NA	NA	NA	NA	NA	NA	GF_celegans
TRINITY_DN23491_c0_g1_i1.p1	100	96	NA	NA	NA	NA	NA	NA	GF_celegans
TRINITY_DN696_c0_g2_i2.p3	100	67	NA	NA	NA	NA	NA	NA	GF_celegans
TRINITY_DN1489_c0_g1_i1.p1	100	99	NA	NA	NA	NA	NA	NA	GF_celegans
TRINITY_DN24883_c0_g1_i1.p2	100	99	NA	NA	NA	NA	NA	NA	GF_celegans
TRINITY_DN18433_c0_g1_i1.p3	100	62	NA	NA	NA	NA	NA	NA	GF_celegans
TRINITY_DN20901_c0_g1_i1.p1	100	85	NA	NA	NA	NA	NA	NA	GF_celegans
TRINITY_DN11635_c0_g1_i1.p1	100	70	NA	NA	NA	NA	NA	NA	GF_celegans
TRINITY_DN21513_c0_g1_i1.p2	100	53	NA	NA	NA	NA	NA	NA	GF_celegans
TRINITY_DN1598_c0_g1_i2.p2	100	80	NA	NA	NA	NA	NA	NA	GF_celegans
TRINITY_DN315_c0_g1_i1.p1	100	80	NA	NA	NA	NA	NA	NA	GF_celegans
TRINITY_DN22139_c0_g1_i1.p1	100	43	NA	NA	NA	NA	NA	NA	GF_celegans
TRINITY_DN4469_c0_g1_i1.p2	100	79	NA	NA	NA	NA	NA	NA	GF_celegans
TRINITY_DN21093_c0_g1_i1.p1	100	96	NA	NA	NA	NA	NA	NA	GF_celegans
TRINITY_DN17669_c0_g1_i1.p1	100	64	NA	NA	NA	NA	NA	NA	GF_celegans
TRINITY_DN11591_c0_g1_i1.p1	100	83	NA	NA	NA	NA	NA	NA	GF_celegans
TRINITY_DN10673_c0_g1_i1.p1	100	89	NA	NA	NA	NA	NA	NA	GF_celegans
TRINITY_DN4096_c0_g1_i2.p1	100	78	NA	NA	NA	NA	NA	NA	GF_celegans
TRINITY_DN16802_c0_g1_i1.p1	100	88	NA	NA	NA	NA	NA	NA	GF_celegans
TRINITY_DN2562_c0_g1_i2.p1	100	82	NA	NA	NA	NA	NA	NA	GF_celegans
TRINITY_DN4694_c0_g1_i1.p2	100	80	NA	NA	NA	NA	NA	NA	GF_celegans
TRINITY_DN8390_c0_g1_i1.p3	100	91	NA	NA	NA	NA	NA	NA	GF_celegans
TRINITY_DN8172_c0_g1_i1.p1	100	93	NA	NA	NA	NA	NA	NA	GF_celegans
TRINITY_DN4612_c0_g1_i1.p1	100	92	NA	NA	NA	NA	NA	NA	GF_celegans
TRINITY_DN12270_c0_g1_i1.p1	100	91	NA	NA	NA	NA	NA	NA	GF_celegans
TRINITY_DN13113_c1_g1_i1.p1	100	94	NA	NA	NA	NA	NA	NA	GF_celegans
TRINITY_DN20370_c0_g1_i1.p1	100	80	NA	NA	NA	NA	NA	NA	GF_celegans
TRINITY_DN5791_c0_g1_i1.p1	100	72	NA	NA	NA	NA	NA	NA	GF_celegans
TRINITY_DN24404_c0_g1_i1.p3	100	74	NA	NA	NA	NA	NA	NA	GF_celegans
TRINITY_DN11173_c0_g1_i1.p1	100	81	NA	NA	NA	NA	NA	NA	GF_celegans
TRINITY_DN7394_c1_g1_i1.p1	100	71	NA	NA	NA	NA	NA	NA	GF_celegans
TRINITY_DN24729_c0_g1_i1.p1	100	70	NA	NA	NA	NA	NA	NA	GF_celegans
TRINITY_DN333_c0_g1_i1.p1	100	90	NA	NA	NA	NA	NA	NA	GF_celegans
TRINITY_DN333_c0_g2_i1.p1	100	87	NA	NA	NA	NA	NA	NA	GF_celegans
TRINITY_DN4063_c0_g1_i3.p1	100	67	NA	NA	NA	NA	NA	NA	GF_celegans
TRINITY_DN2372_c0_g1_i1.p1	100	92	NA	NA	NA	NA	NA	NA	GF_celegans
TRINITY_DN15854_c0_g1_i1.p1	100	67	NA	NA	NA	NA	NA	NA	GF_celegans
TRINITY_DN10192_c0_g1_i1.p1	100	99	NA	NA	NA	NA	NA	NA	GF_celegans
TRINITY_DN20698_c0_g1_i1.p1	100	90	NA	NA	NA	NA	NA	NA	GF_celegans
TRINITY_DN613_c0_g2_i1.p1	100	94	NA	NA	NA	NA	NA	NA	GF_celegans
TRINITY_DN4589_c0_g1_i1.p3	100	57	NA	NA	NA	NA	NA	NA	GF_celegans
TRINITY_DN2366_c0_g1_i1.p1	100	77	NA	NA	NA	NA	NA	NA	GF_celegans
TRINITY_DN5288_c0_g1_i1.p1	100	94	NA	NA	NA	NA	NA	NA	GF_celegans
TRINITY_DN18543_c0_g1_i1.p1	100	51	NA	NA	NA	NA	NA	NA	GF_celegans
TRINITY_DN19950_c0_g1_i1.p4	100	83	NA	NA	NA	NA	NA	NA	GF_celegans
TRINITY_DN15968_c0_g1_i1.p2	100	67	NA	NA	NA	NA	NA	NA	GF_celegans
TRINITY_DN4868_c0_g1_i1.p1	100	59	NA	NA	NA	NA	NA	NA	GF_celegans
TRINITY_DN16384_c0_g1_i1.p1	100	89	NA	NA	NA	NA	NA	NA	GF_celegans
TRINITY_DN19851_c0_g1_i1.p1	100	70	NA	NA	NA	NA	NA	NA	GF_celegans
TRINITY_DN8835_c0_g1_i1.p1	100	90	NA	NA	NA	NA	NA	NA	GF_celegans
TRINITY_DN1720_c0_g1_i1.p1	100	76	NA	NA	NA	NA	NA	NA	GF_celegans
TRINITY_DN5192_c0_g1_i1.p1	100	64	NA	NA	NA	NA	NA	NA	GF_celegans
TRINITY_DN13542_c0_g1_i1.p1	100	92	NA	NA	NA	NA	NA	NA	GF_celegans
TRINITY_DN21342_c0_g1_i1.p1	100	67	NA	NA	NA	NA	NA	NA	GF_celegans
TRINITY_DN239_c0_g1_i1.p1	100	77	NA	NA	NA	NA	NA	NA	GF_celegans
TRINITY_DN15093_c0_g1_i1.p1	100	83	NA	NA	NA	NA	NA	NA	GF_celegans
TRINITY_DN239_c0_g2_i2.p2	100	86	NA	NA	NA	NA	NA	NA	GF_celegans
TRINITY_DN239_c0_g2_i1.p3	100	85	NA	NA	NA	NA	NA	NA	GF_celegans
TRINITY_DN6130_c0_g1_i1.p1	100	87	NA	NA	NA	NA	NA	NA	GF_celegans
TRINITY_DN6808_c0_g1_i3.p2	100	52	NA	NA	NA	NA	NA	NA	GF_celegans
TRINITY_DN12830_c0_g1_i1.p1	100	57	NA	NA	NA	NA	NA	NA	GF_celegans
TRINITY_DN23154_c0_g1_i1.p1	100	75	NA	NA	NA	NA	NA	NA	GF_celegans
TRINITY_DN25162_c0_g1_i1.p1	100	80	NA	NA	NA	NA	NA	NA	GF_celegans
TRINITY_DN25364_c0_g1_i1.p2	100	94	NA	NA	NA	NA	NA	NA	GF_celegans
TRINITY_DN8642_c0_g1_i1.p1	100	99	NA	NA	NA	NA	NA	NA	GF_celegans
TRINITY_DN6741_c0_g1_i1.p1	100	88	NA	NA	NA	NA	NA	NA	GF_celegans
TRINITY_DN6741_c0_g1_i2.p1	100	90	NA	NA	NA	NA	NA	NA	GF_celegans
TRINITY_DN25512_c0_g1_i1.p2	100	67	NA	NA	NA	NA	NA	NA	GF_celegans
TRINITY_DN22172_c0_g1_i1.p1	100	99	NA	NA	NA	NA	NA	NA	GF_celegans
TRINITY_DN21806_c0_g1_i1.p1	100	87	NA	NA	NA	NA	NA	NA	GF_celegans
TRINITY_DN16910_c0_g1_i1.p1	100	67	NA	NA	NA	NA	NA	NA	GF_celegans
TRINITY_DN4514_c0_g3_i1.p2	100	57	NA	NA	NA	NA	NA	NA	GF_celegans
TRINITY_DN15147_c0_g1_i1.p1	100	90	NA	NA	NA	NA	NA	NA	GF_celegans
TRINITY_DN22239_c0_g1_i1.p1	100	88	NA	NA	NA	NA	NA	NA	GF_celegans
TRINITY_DN18561_c0_g1_i1.p1	100	62	NA	NA	NA	NA	NA	NA	GF_celegans
TRINITY_DN17291_c0_g1_i1.p1	100	66	NA	NA	NA	NA	NA	NA	GF_celegans
TRINITY_DN20813_c0_g1_i1.p3	100	63	NA	NA	NA	NA	NA	NA	GF_celegans
TRINITY_DN7064_c0_g2_i1.p2	100	57	NA	NA	NA	NA	NA	NA	GF_celegans
TRINITY_DN10312_c0_g1_i1.p1	100	96	NA	NA	NA	NA	NA	NA	GF_celegans
TRINITY_DN1839_c0_g1_i1.p6	100	56	NA	NA	NA	NA	NA	NA	GF_celegans
TRINITY_DN15438_c0_g1_i1.p1	100	89	NA	NA	NA	NA	NA	NA	GF_celegans
TRINITY_DN1366_c0_g3_i1.p2	100	95	NA	NA	NA	NA	NA	NA	GF_celegans
TRINITY_DN14760_c1_g1_i1.p1	100	70	NA	NA	NA	NA	NA	NA	GF_celegans
TRINITY_DN13974_c0_g1_i1.p1	100	76	NA	NA	NA	NA	NA	NA	GF_celegans
TRINITY_DN3937_c0_g1_i2.p2	100	69	NA	NA	NA	NA	NA	NA	GF_celegans
TRINITY_DN1265_c0_g1_i1.p2	100	96	NA	NA	NA	NA	NA	NA	GF_celegans
TRINITY_DN25009_c0_g1_i1.p1	100	49	NA	NA	NA	NA	NA	NA	GF_celegans
TRINITY_DN25180_c0_g1_i1.p1	100	56	NA	NA	NA	NA	NA	NA	GF_celegans
TRINITY_DN8519_c0_g1_i1.p4	100	65	NA	NA	NA	NA	NA	NA	GF_celegans
TRINITY_DN2562_c0_g2_i1.p1	100	84	NA	NA	NA	NA	NA	NA	GF_celegans
TRINITY_DN7383_c0_g1_i1.p1	100	72	NA	NA	NA	NA	NA	NA	GF_celegans
TRINITY_DN8511_c0_g2_i3.p1	100	34	NA	NA	NA	NA	NA	NA	GF_celegans
TRINITY_DN13644_c0_g1_i1.p1	100	75	NA	NA	NA	NA	NA	NA	GF_celegans
TRINITY_DN7618_c0_g1_i2.p1	100	70	NA	NA	NA	NA	NA	NA	GF_celegans
TRINITY_DN10135_c0_g1_i1.p1	100	73	NA	NA	NA	NA	NA	NA	GF_celegans
TRINITY_DN6608_c0_g1_i1.p3	100	49	NA	NA	NA	NA	NA	NA	GF_celegans
TRINITY_DN5699_c0_g1_i1.p2	100	59	NA	NA	NA	NA	NA	NA	GF_celegans
TRINITY_DN11593_c0_g1_i2.p1	100	91	NA	NA	NA	NA	NA	NA	GF_celegans
TRINITY_DN5434_c0_g1_i1.p1	100	62	NA	NA	NA	NA	NA	NA	GF_celegans
TRINITY_DN22862_c0_g1_i1.p1	100	79	NA	NA	NA	NA	NA	NA	GF_celegans
TRINITY_DN418_c0_g2_i2.p1	100	94	NA	NA	NA	NA	NA	NA	GF_celegans
TRINITY_DN82_c0_g1_i1.p4	100	27	NA	NA	NA	NA	NA	NA	GF_celegans
TRINITY_DN22442_c0_g1_i1.p1	100	94	NA	NA	NA	NA	NA	NA	GF_celegans
TRINITY_DN5671_c0_g1_i1.p1	100	87	NA	NA	NA	NA	NA	NA	GF_celegans
TRINITY_DN5014_c0_g1_i1.p1	100	87	NA	NA	NA	NA	NA	NA	GF_celegans
TRINITY_DN24827_c0_g1_i1.p1	100	88	NA	NA	NA	NA	NA	NA	GF_celegans
TRINITY_DN7643_c0_g1_i1.p2	100	49	NA	NA	NA	NA	NA	NA	GF_celegans
TRINITY_DN11933_c0_g1_i1.p1	100	96	NA	NA	NA	NA	NA	NA	GF_celegans
TRINITY_DN15221_c0_g1_i1.p1	100	78	NA	NA	NA	NA	NA	NA	GF_celegans
TRINITY_DN3022_c0_g1_i2.p3	100	55	NA	NA	NA	NA	NA	NA	GF_celegans
TRINITY_DN872_c0_g1_i2.p1	100	79	NA	NA	NA	NA	NA	NA	GF_celegans
TRINITY_DN872_c0_g1_i1.p1	100	65	NA	NA	NA	NA	NA	NA	GF_celegans
TRINITY_DN1958_c0_g2_i1.p1	100	85	NA	NA	NA	NA	NA	NA	GF_celegans
TRINITY_DN23216_c0_g1_i1.p1	100	76	NA	NA	NA	NA	NA	NA	GF_celegans
TRINITY_DN2473_c0_g1_i2.p1	100	67	NA	NA	NA	NA	NA	NA	GF_celegans
TRINITY_DN900_c0_g4_i1.p2	100	70	NA	NA	NA	NA	NA	NA	GF_celegans
TRINITY_DN7500_c0_g1_i1.p1	100	94	NA	NA	NA	NA	NA	NA	GF_celegans
TRINITY_DN385_c0_g1_i1.p1	100	65	NA	NA	NA	NA	NA	NA	GF_celegans
TRINITY_DN4437_c0_g1_i1.p1	100	80	NA	NA	NA	NA	NA	NA	GF_celegans
TRINITY_DN3422_c0_g1_i1.p5	100	42	NA	NA	NA	NA	NA	NA	GF_celegans
TRINITY_DN4368_c0_g1_i2.p1	100	88	NA	NA	NA	NA	NA	NA	GF_celegans
TRINITY_DN22645_c0_g1_i1.p1	100	86	NA	NA	NA	NA	NA	NA	GF_celegans
TRINITY_DN19049_c0_g1_i1.p2	100	34	NA	NA	NA	NA	NA	NA	GF_celegans
TRINITY_DN1296_c0_g1_i1.p1	100	86	NA	NA	NA	NA	NA	NA	GF_celegans
TRINITY_DN1296_c0_g1_i6.p1	100	86	NA	NA	NA	NA	NA	NA	GF_celegans
TRINITY_DN17769_c0_g1_i1.p1	100	55	NA	NA	NA	NA	NA	NA	GF_celegans
TRINITY_DN7424_c0_g1_i1.p1	100	83	NA	NA	NA	NA	NA	NA	GF_celegans
TRINITY_DN9678_c0_g1_i1.p1	100	93	NA	NA	NA	NA	NA	NA	GF_celegans
TRINITY_DN18274_c0_g1_i1.p1	100	99	NA	NA	NA	NA	NA	NA	GF_celegans
TRINITY_DN25705_c0_g1_i1.p1	100	74	NA	NA	NA	NA	NA	NA	GF_celegans
TRINITY_DN4189_c0_g1_i2.p1	100	88	NA	NA	NA	NA	NA	NA	GF_celegans
TRINITY_DN22841_c0_g1_i1.p1	100	88	NA	NA	NA	NA	NA	NA	GF_celegans
TRINITY_DN9776_c0_g1_i1.p1	100	95	NA	NA	NA	NA	NA	NA	GF_celegans
TRINITY_DN11072_c0_g1_i1.p1	100	95	NA	NA	NA	NA	NA	NA	GF_celegans
TRINITY_DN13754_c0_g1_i1.p1	100	77	NA	NA	NA	NA	NA	NA	GF_celegans
TRINITY_DN1925_c0_g1_i1.p3	100	84	NA	NA	NA	NA	NA	NA	GF_celegans
TRINITY_DN8353_c0_g1_i1.p1	100	61	NA	NA	NA	NA	NA	NA	GF_celegans
TRINITY_DN18701_c0_g1_i1.p3	100	75	NA	NA	NA	NA	NA	NA	GF_celegans
TRINITY_DN15838_c0_g1_i1.p1	100	77	NA	NA	NA	NA	NA	NA	GF_celegans
TRINITY_DN22796_c0_g1_i1.p1	100	69	NA	NA	NA	NA	NA	NA	GF_celegans
TRINITY_DN20161_c0_g1_i1.p1	100	97	NA	NA	NA	NA	NA	NA	GF_celegans
TRINITY_DN12090_c0_g1_i1.p1	100	84	NA	NA	NA	NA	NA	NA	GF_celegans
TRINITY_DN25415_c0_g1_i1.p1	100	90	NA	NA	NA	NA	NA	NA	GF_celegans
TRINITY_DN14600_c0_g1_i1.p3	100	59	NA	NA	NA	NA	NA	NA	GF_celegans
TRINITY_DN14188_c0_g2_i1.p1	100	91	NA	NA	NA	NA	NA	NA	GF_celegans
TRINITY_DN586_c0_g1_i3.p2	100	36	NA	NA	NA	NA	NA	NA	GF_celegans
TRINITY_DN21610_c0_g1_i1.p1	100	76	NA	NA	NA	NA	NA	NA	GF_celegans
TRINITY_DN23703_c0_g1_i1.p1	100	83	NA	NA	NA	NA	NA	NA	GF_celegans
TRINITY_DN22356_c0_g1_i1.p1	100	76	NA	NA	NA	NA	NA	NA	GF_celegans
TRINITY_DN22308_c0_g1_i1.p1	100	80	NA	NA	NA	NA	NA	NA	GF_celegans
TRINITY_DN5088_c0_g1_i1.p1	100	97	NA	NA	NA	NA	NA	NA	GF_celegans
TRINITY_DN18260_c0_g1_i1.p1	100	90	NA	NA	NA	NA	NA	NA	GF_celegans
TRINITY_DN3003_c0_g1_i1.p1	100	89	NA	NA	NA	NA	NA	NA	GF_celegans
TRINITY_DN18538_c0_g1_i1.p1	100	98	NA	NA	NA	NA	NA	NA	GF_celegans
TRINITY_DN3630_c0_g1_i1.p1	100	87	NA	NA	NA	NA	NA	NA	GF_celegans
TRINITY_DN24771_c0_g1_i1.p2	100	81	NA	NA	NA	NA	NA	NA	GF_celegans
TRINITY_DN15620_c0_g1_i1.p3	100	99	NA	NA	NA	NA	NA	NA	GF_celegans
TRINITY_DN21315_c0_g1_i1.p1	100	90	NA	NA	NA	NA	NA	NA	GF_celegans
TRINITY_DN10365_c0_g1_i1.p1	100	97	NA	NA	NA	NA	NA	NA	GF_celegans
TRINITY_DN113_c0_g1_i1.p2	100	85	NA	NA	NA	NA	NA	NA	GF_celegans
TRINITY_DN18474_c0_g1_i1.p3	100	51	NA	NA	NA	NA	NA	NA	GF_celegans
TRINITY_DN20548_c0_g1_i1.p2	100	72	NA	NA	NA	NA	NA	NA	GF_celegans
TRINITY_DN3648_c0_g1_i1.p2	100	82	NA	NA	NA	NA	NA	NA	GF_celegans
TRINITY_DN25650_c0_g1_i1.p3	100	66	NA	NA	NA	NA	NA	NA	GF_celegans
TRINITY_DN21085_c0_g1_i1.p1	100	54	NA	NA	NA	NA	NA	NA	GF_celegans
TRINITY_DN19746_c0_g1_i1.p2	100	91	NA	NA	NA	NA	NA	NA	GF_celegans
TRINITY_DN20656_c0_g1_i1.p1	100	80	NA	NA	NA	NA	NA	NA	GF_celegans
TRINITY_DN11082_c0_g1_i1.p1	100	90	NA	NA	NA	NA	NA	NA	GF_celegans
TRINITY_DN20270_c0_g1_i1.p1	100	65	NA	NA	NA	NA	NA	NA	GF_celegans
TRINITY_DN23282_c0_g1_i1.p2	100	74	NA	NA	NA	NA	NA	NA	GF_celegans
TRINITY_DN24351_c0_g1_i1.p1	100	95	NA	NA	NA	NA	NA	NA	GF_celegans
TRINITY_DN12117_c0_g1_i1.p1	100	80	NA	NA	NA	NA	NA	NA	GF_celegans
TRINITY_DN331_c0_g1_i1.p3	100	74	NA	NA	NA	NA	NA	NA	GF_celegans
TRINITY_DN331_c0_g1_i2.p1	100	74	NA	NA	NA	NA	NA	NA	GF_celegans
TRINITY_DN24989_c0_g1_i1.p3	100	74	NA	NA	NA	NA	NA	NA	GF_celegans
TRINITY_DN20997_c0_g1_i1.p2	100	82	NA	NA	NA	NA	NA	NA	GF_celegans
TRINITY_DN3382_c0_g1_i1.p1	100	95	NA	NA	NA	NA	NA	NA	GF_celegans
TRINITY_DN7410_c0_g2_i3.p6	100	69	NA	NA	NA	NA	NA	NA	GF_celegans
TRINITY_DN16532_c0_g1_i1.p1	100	85	NA	NA	NA	NA	NA	NA	GF_celegans
TRINITY_DN18749_c0_g1_i1.p1	100	84	NA	NA	NA	NA	NA	NA	GF_celegans
TRINITY_DN3619_c0_g1_i1.p1	100	71	NA	NA	NA	NA	NA	NA	GF_celegans
TRINITY_DN1628_c0_g1_i1.p1	100	91	NA	NA	NA	NA	NA	NA	GF_celegans
TRINITY_DN3008_c0_g1_i1.p1	100	92	NA	NA	NA	NA	NA	NA	GF_celegans
TRINITY_DN20134_c0_g1_i1.p1	100	98	NA	NA	NA	NA	NA	NA	GF_celegans
TRINITY_DN20234_c0_g1_i1.p1	100	81	NA	NA	NA	NA	NA	NA	GF_celegans
TRINITY_DN9382_c0_g1_i1.p1	100	79	NA	NA	NA	NA	NA	NA	GF_celegans
TRINITY_DN12454_c0_g1_i1.p1	100	77	NA	NA	NA	NA	NA	NA	GF_celegans
TRINITY_DN23507_c0_g1_i1.p1	100	89	NA	NA	NA	NA	NA	NA	GF_celegans
TRINITY_DN2538_c0_g1_i3.p4	100	76	NA	NA	NA	NA	NA	NA	GF_celegans
TRINITY_DN20898_c0_g1_i1.p2	100	77	NA	NA	NA	NA	NA	NA	GF_celegans
TRINITY_DN25770_c0_g1_i1.p1	100	50	NA	NA	NA	NA	NA	NA	GF_celegans
TRINITY_DN4034_c0_g2_i1.p2	100	71	NA	NA	NA	NA	NA	NA	GF_celegans
TRINITY_DN5623_c0_g1_i1.p1	100	92	NA	NA	NA	NA	NA	NA	GF_celegans
TRINITY_DN15922_c0_g1_i1.p1	100	94	NA	NA	NA	NA	NA	NA	GF_celegans
TRINITY_DN20961_c0_g1_i1.p1	100	67	NA	NA	NA	NA	NA	NA	GF_celegans
TRINITY_DN15115_c0_g1_i1.p1	100	94	NA	NA	NA	NA	NA	NA	GF_celegans
TRINITY_DN19134_c0_g1_i1.p3	100	86	NA	NA	NA	NA	NA	NA	GF_celegans
TRINITY_DN6044_c0_g1_i3.p2	100	89	NA	NA	NA	NA	NA	NA	GF_celegans
TRINITY_DN4910_c0_g1_i1.p1	100	88	NA	NA	NA	NA	NA	NA	GF_celegans
TRINITY_DN3595_c0_g1_i5.p1	100	69	NA	NA	NA	NA	NA	NA	GF_celegans
TRINITY_DN15713_c0_g1_i1.p1	100	85	NA	NA	NA	NA	NA	NA	GF_celegans
TRINITY_DN15140_c0_g1_i1.p1	100	63	NA	NA	NA	NA	NA	NA	GF_celegans
TRINITY_DN3574_c0_g1_i1.p1	100	68	NA	NA	NA	NA	NA	NA	GF_celegans
TRINITY_DN4069_c0_g1_i1.p1	100	94	NA	NA	NA	NA	NA	NA	GF_celegans
TRINITY_DN25409_c0_g1_i1.p1	100	76	NA	NA	NA	NA	NA	NA	GF_celegans
TRINITY_DN3702_c0_g1_i1.p3	100	74	NA	NA	NA	NA	NA	NA	GF_celegans
TRINITY_DN22835_c0_g1_i1.p1	100	94	NA	NA	NA	NA	NA	NA	GF_celegans
TRINITY_DN9197_c0_g1_i1.p1	100	68	NA	NA	NA	NA	NA	NA	GF_celegans
TRINITY_DN19009_c0_g1_i1.p2	100	64	NA	NA	NA	NA	NA	NA	GF_celegans
TRINITY_DN2656_c0_g1_i2.p2	100	91	NA	NA	NA	NA	NA	NA	GF_celegans
TRINITY_DN14942_c0_g1_i1.p3	100	60	NA	NA	NA	NA	NA	NA	GF_celegans
TRINITY_DN10511_c0_g1_i1.p1	100	73	NA	NA	NA	NA	NA	NA	GF_celegans
TRINITY_DN12556_c0_g1_i1.p1	100	68	NA	NA	NA	NA	NA	NA	GF_celegans
TRINITY_DN900_c0_g1_i3.p1	100	71	NA	NA	NA	NA	NA	NA	GF_celegans
TRINITY_DN20492_c0_g1_i1.p1	100	69	NA	NA	NA	NA	NA	NA	GF_celegans
TRINITY_DN404_c0_g1_i1.p4	100	57	NA	NA	NA	NA	NA	NA	GF_celegans
TRINITY_DN5500_c0_g1_i1.p3	100	55	NA	NA	NA	NA	NA	NA	GF_celegans
TRINITY_DN579_c0_g2_i1.p1	100	73	NA	NA	NA	NA	NA	NA	GF_celegans
TRINITY_DN5658_c0_g1_i1.p1	100	99	NA	NA	NA	NA	NA	NA	GF_celegans
TRINITY_DN4159_c0_g1_i1.p1	100	70	NA	NA	NA	NA	NA	NA	GF_celegans
TRINITY_DN18862_c0_g1_i1.p2	100	64	NA	NA	NA	NA	NA	NA	GF_celegans
TRINITY_DN24707_c0_g1_i1.p1	100	78	NA	NA	NA	NA	NA	NA	GF_celegans
TRINITY_DN24159_c0_g1_i1.p1	100	96	NA	NA	NA	NA	NA	NA	GF_celegans
TRINITY_DN22559_c0_g1_i1.p1	100	96	NA	NA	NA	NA	NA	NA	GF_celegans
TRINITY_DN9350_c0_g1_i2.p1	100	92	NA	NA	NA	NA	NA	NA	GF_celegans
TRINITY_DN9350_c0_g1_i2.p2	100	68	NA	NA	NA	NA	NA	NA	GF_celegans
TRINITY_DN9599_c0_g2_i1.p1	100	92	NA	NA	NA	NA	NA	NA	GF_celegans
TRINITY_DN21865_c0_g1_i1.p1	100	93	NA	NA	NA	NA	NA	NA	GF_celegans
TRINITY_DN8813_c0_g1_i1.p3	100	72	NA	NA	NA	NA	NA	NA	GF_celegans
TRINITY_DN22415_c0_g1_i1.p1	100	74	NA	NA	NA	NA	NA	NA	GF_celegans
TRINITY_DN843_c0_g1_i1.p1	100	73	NA	NA	NA	NA	NA	NA	GF_celegans
TRINITY_DN6963_c0_g1_i2.p1	100	70	NA	NA	NA	NA	NA	NA	GF_celegans
TRINITY_DN25733_c0_g1_i1.p2	100	89	NA	NA	NA	NA	NA	NA	GF_celegans
TRINITY_DN5633_c0_g1_i1.p1	100	73	NA	NA	NA	NA	NA	NA	GF_celegans
TRINITY_DN2662_c0_g1_i3.p2	100	74	NA	NA	NA	NA	NA	NA	GF_celegans
TRINITY_DN20274_c0_g1_i1.p1	100	95	NA	NA	NA	NA	NA	NA	GF_celegans
TRINITY_DN2451_c0_g2_i2.p1	100	84	NA	NA	NA	NA	NA	NA	GF_celegans
TRINITY_DN811_c0_g1_i1.p1	100	63	NA	NA	NA	NA	NA	NA	GF_celegans
TRINITY_DN21958_c0_g1_i1.p2	100	66	NA	NA	NA	NA	NA	NA	GF_celegans
TRINITY_DN20288_c0_g1_i1.p1	100	89	NA	NA	NA	NA	NA	NA	GF_celegans
TRINITY_DN13572_c0_g1_i1.p1	100	83	NA	NA	NA	NA	NA	NA	GF_celegans
TRINITY_DN6683_c0_g2_i1.p2	100	63	NA	NA	NA	NA	NA	NA	GF_celegans
TRINITY_DN19420_c0_g1_i1.p1	100	72	NA	NA	NA	NA	NA	NA	GF_celegans
TRINITY_DN23252_c0_g1_i1.p2	100	57	NA	NA	NA	NA	NA	NA	GF_celegans
TRINITY_DN21811_c0_g1_i1.p1	100	89	NA	NA	NA	NA	NA	NA	GF_celegans
TRINITY_DN15462_c0_g1_i1.p1	100	86	NA	NA	NA	NA	NA	NA	GF_celegans
TRINITY_DN20854_c0_g1_i1.p1	100	97	NA	NA	NA	NA	NA	NA	GF_celegans
TRINITY_DN22915_c0_g1_i1.p1	100	86	NA	NA	NA	NA	NA	NA	GF_celegans
TRINITY_DN5151_c0_g1_i1.p1	100	70	NA	NA	NA	NA	NA	NA	GF_celegans
TRINITY_DN8768_c0_g1_i1.p2	100	61	NA	NA	NA	NA	NA	NA	GF_celegans
TRINITY_DN8511_c0_g2_i2.p5	100	34	NA	NA	NA	NA	NA	NA	GF_celegans
TRINITY_DN16164_c0_g1_i1.p1	100	77	NA	NA	NA	NA	NA	NA	GF_celegans
TRINITY_DN1180_c0_g1_i2.p1	100	75	NA	NA	NA	NA	NA	NA	GF_celegans
TRINITY_DN22340_c0_g1_i1.p1	100	59	NA	NA	NA	NA	NA	NA	GF_celegans
TRINITY_DN13402_c0_g1_i1.p1	100	91	NA	NA	NA	NA	NA	NA	GF_celegans
TRINITY_DN19217_c0_g1_i1.p1	100	79	NA	NA	NA	NA	NA	NA	GF_celegans
TRINITY_DN2386_c0_g1_i1.p5	100	80	NA	NA	NA	NA	NA	NA	GF_celegans
TRINITY_DN12024_c0_g1_i1.p1	100	85	NA	NA	NA	NA	NA	NA	GF_celegans
TRINITY_DN19492_c0_g1_i1.p1	100	84	NA	NA	NA	NA	NA	NA	GF_celegans
TRINITY_DN5439_c0_g1_i4.p1	100	77	NA	NA	NA	NA	NA	NA	GF_celegans
TRINITY_DN16340_c0_g1_i1.p2	100	46	NA	NA	NA	NA	NA	NA	GF_celegans
TRINITY_DN995_c0_g1_i3.p5	100	71	NA	NA	NA	NA	NA	NA	GF_celegans
TRINITY_DN1388_c0_g1_i2.p1	100	69	NA	NA	NA	NA	NA	NA	GF_celegans
TRINITY_DN4811_c0_g1_i2.p1	100	89	NA	NA	NA	NA	NA	NA	GF_celegans
TRINITY_DN15055_c0_g1_i1.p1	100	92	NA	NA	NA	NA	NA	NA	GF_celegans
TRINITY_DN7256_c0_g1_i1.p2	100	88	NA	NA	NA	NA	NA	NA	GF_celegans
TRINITY_DN2635_c0_g1_i1.p1	100	40	NA	NA	NA	NA	NA	NA	GF_celegans
TRINITY_DN4398_c0_g1_i1.p1	100	97	NA	NA	NA	NA	NA	NA	GF_celegans
TRINITY_DN6786_c0_g1_i1.p1	100	67	NA	NA	NA	NA	NA	NA	GF_celegans
TRINITY_DN25624_c0_g1_i1.p1	100	80	NA	NA	NA	NA	NA	NA	GF_celegans
TRINITY_DN22037_c0_g1_i1.p1	100	66	NA	NA	NA	NA	NA	NA	GF_celegans
TRINITY_DN2716_c0_g1_i1.p1	100	70	NA	NA	NA	NA	NA	NA	GF_celegans
TRINITY_DN21779_c0_g1_i1.p3	100	75	NA	NA	NA	NA	NA	NA	GF_celegans
TRINITY_DN6708_c0_g1_i1.p1	100	83	NA	NA	NA	NA	NA	NA	GF_celegans
TRINITY_DN2586_c0_g2_i1.p1	100	37	NA	NA	NA	NA	NA	NA	GF_celegans
TRINITY_DN22887_c0_g1_i1.p2	100	69	NA	NA	NA	NA	NA	NA	GF_celegans
TRINITY_DN2370_c0_g1_i1.p2	100	86	NA	NA	NA	NA	NA	NA	GF_celegans
TRINITY_DN12004_c0_g3_i1.p1	100	77	NA	NA	NA	NA	NA	NA	GF_celegans
TRINITY_DN18548_c0_g1_i1.p1	100	76	NA	NA	NA	NA	NA	NA	GF_celegans
TRINITY_DN1118_c0_g3_i2.p1	100	80	NA	NA	NA	NA	NA	NA	GF_celegans
TRINITY_DN1586_c0_g2_i1.p1	100	83	NA	NA	NA	NA	NA	NA	GF_celegans
TRINITY_DN23050_c0_g1_i1.p1	100	67	NA	NA	NA	NA	NA	NA	GF_celegans
TRINITY_DN7038_c0_g7_i1.p1	100	71	NA	NA	NA	NA	NA	NA	GF_celegans
TRINITY_DN2511_c0_g1_i2.p1	100	71	NA	NA	NA	NA	NA	NA	GF_celegans
TRINITY_DN24538_c0_g1_i1.p2	100	74	NA	NA	NA	NA	NA	NA	GF_celegans
TRINITY_DN16997_c0_g1_i1.p1	100	74	NA	NA	NA	NA	NA	NA	GF_celegans
TRINITY_DN23901_c0_g1_i1.p1	100	73	NA	NA	NA	NA	NA	NA	GF_celegans
TRINITY_DN2511_c0_g1_i1.p1	100	71	NA	NA	NA	NA	NA	NA	GF_celegans
TRINITY_DN15526_c0_g1_i1.p2	100	81	NA	NA	NA	NA	NA	NA	GF_celegans
TRINITY_DN5728_c0_g2_i1.p1	100	57	NA	NA	NA	NA	NA	NA	GF_celegans
TRINITY_DN12572_c0_g2_i1.p1	100	84	NA	NA	NA	NA	NA	NA	GF_celegans
TRINITY_DN8527_c0_g1_i1.p1	100	83	NA	NA	NA	NA	NA	NA	GF_celegans
TRINITY_DN8534_c0_g1_i1.p1	100	82	NA	NA	NA	NA	NA	NA	GF_celegans
TRINITY_DN7995_c0_g1_i1.p2	100	60	NA	NA	NA	NA	NA	NA	GF_celegans
TRINITY_DN9005_c0_g1_i2.p2	100	88	NA	NA	NA	NA	NA	NA	GF_celegans
TRINITY_DN9522_c1_g2_i2.p1	100	85	NA	NA	NA	NA	NA	NA	GF_celegans
TRINITY_DN19188_c0_g1_i1.p1	100	96	NA	NA	NA	NA	NA	NA	GF_celegans
TRINITY_DN900_c0_g3_i1.p2	100	70	NA	NA	NA	NA	NA	NA	GF_celegans
TRINITY_DN6067_c0_g1_i1.p2	100	79	NA	NA	NA	NA	NA	NA	GF_celegans
TRINITY_DN16615_c0_g1_i1.p2	100	62	NA	NA	NA	NA	NA	NA	GF_celegans
TRINITY_DN4133_c0_g2_i1.p1	100	49	NA	NA	NA	NA	NA	NA	GF_celegans
TRINITY_DN1749_c0_g1_i2.p1	100	87	NA	NA	NA	NA	NA	NA	GF_celegans
TRINITY_DN18041_c0_g1_i1.p1	100	96	NA	NA	NA	NA	NA	NA	GF_celegans
TRINITY_DN1965_c0_g1_i1.p1	100	90	NA	NA	NA	NA	NA	NA	GF_celegans
TRINITY_DN21023_c0_g1_i1.p1	100	76	NA	NA	NA	NA	NA	NA	GF_celegans
TRINITY_DN21502_c0_g1_i1.p1	100	83	NA	NA	NA	NA	NA	NA	GF_celegans
TRINITY_DN25213_c0_g1_i1.p1	100	58	NA	NA	NA	NA	NA	NA	GF_celegans
TRINITY_DN2521_c0_g1_i2.p2	100	58	NA	NA	NA	NA	NA	NA	GF_celegans
TRINITY_DN423_c1_g1_i1.p2	100	71	NA	NA	NA	NA	NA	NA	GF_celegans
TRINITY_DN11663_c0_g1_i1.p3	100	27	NA	NA	NA	NA	NA	NA	GF_celegans
TRINITY_DN7372_c0_g1_i1.p1	100	89	NA	NA	NA	NA	NA	NA	GF_celegans
TRINITY_DN3440_c0_g2_i4.p3	100	72	NA	NA	NA	NA	NA	NA	GF_celegans
TRINITY_DN10160_c0_g1_i3.p1	100	47	NA	NA	NA	NA	NA	NA	GF_celegans
TRINITY_DN17053_c0_g1_i1.p1	100	91	NA	NA	NA	NA	NA	NA	GF_celegans
TRINITY_DN1022_c0_g1_i1.p2	100	78	NA	NA	NA	NA	NA	NA	GF_celegans
TRINITY_DN15333_c0_g1_i1.p2	100	76	NA	NA	NA	NA	NA	NA	GF_celegans
TRINITY_DN1869_c0_g3_i1.p1	100	98	NA	NA	NA	NA	NA	NA	GF_celegans
TRINITY_DN10891_c0_g1_i1.p2	100	51	NA	NA	NA	NA	NA	NA	GF_celegans
TRINITY_DN32_c0_g2_i1.p2	100	58	NA	NA	NA	NA	NA	NA	GF_celegans
TRINITY_DN20272_c0_g1_i1.p1	100	86	NA	NA	NA	NA	NA	NA	GF_celegans
TRINITY_DN20464_c0_g1_i1.p1	100	90	NA	NA	NA	NA	NA	NA	GF_celegans
TRINITY_DN112_c0_g1_i1.p3	100	73	NA	NA	NA	NA	NA	NA	GF_celegans
TRINITY_DN13814_c0_g1_i1.p1	100	60	NA	NA	NA	NA	NA	NA	GF_celegans
TRINITY_DN417_c0_g1_i1.p6	100	77	NA	NA	NA	NA	NA	NA	GF_celegans
TRINITY_DN18377_c0_g1_i1.p1	100	92	NA	NA	NA	NA	NA	NA	GF_celegans
TRINITY_DN1399_c0_g1_i2.p3	100	62	NA	NA	NA	NA	NA	NA	GF_celegans
TRINITY_DN7424_c0_g2_i1.p1	100	93	NA	NA	NA	NA	NA	NA	GF_celegans
TRINITY_DN3500_c0_g1_i1.p1	100	90	NA	NA	NA	NA	NA	NA	GF_celegans
TRINITY_DN8395_c0_g1_i1.p1	100	91	NA	NA	NA	NA	NA	NA	GF_celegans
TRINITY_DN6296_c0_g1_i1.p1	100	59	NA	NA	NA	NA	NA	NA	GF_celegans
TRINITY_DN16561_c0_g1_i1.p1	100	91	NA	NA	NA	NA	NA	NA	GF_celegans
TRINITY_DN20225_c0_g1_i1.p1	100	71	NA	NA	NA	NA	NA	NA	GF_celegans
TRINITY_DN6_c0_g4_i1.p2	100	68	NA	NA	NA	NA	NA	NA	GF_celegans
TRINITY_DN3601_c0_g1_i1.p1	100	79	NA	NA	NA	NA	NA	NA	GF_celegans
TRINITY_DN14317_c0_g1_i1.p1	100	73	NA	NA	NA	NA	NA	NA	GF_celegans
TRINITY_DN17503_c0_g1_i1.p1	100	68	NA	NA	NA	NA	NA	NA	GF_celegans
TRINITY_DN3868_c0_g1_i1.p1	100	50	NA	NA	NA	NA	NA	NA	GF_celegans
TRINITY_DN23136_c0_g1_i1.p1	100	80	NA	NA	NA	NA	NA	NA	GF_celegans
TRINITY_DN25081_c0_g1_i1.p1	100	78	NA	NA	NA	NA	NA	NA	GF_celegans
TRINITY_DN2629_c0_g1_i1.p1	100	97	NA	NA	NA	NA	NA	NA	GF_celegans
TRINITY_DN4590_c0_g1_i1.p3	100	93	NA	NA	NA	NA	NA	NA	GF_celegans
TRINITY_DN7799_c0_g1_i1.p2	100	53	NA	NA	NA	NA	NA	NA	GF_celegans
TRINITY_DN25521_c0_g1_i1.p1	100	73	NA	NA	NA	NA	NA	NA	GF_celegans
TRINITY_DN6142_c0_g1_i1.p1	100	73	NA	NA	NA	NA	NA	NA	GF_celegans
TRINITY_DN17902_c0_g1_i1.p1	100	69	NA	NA	NA	NA	NA	NA	GF_celegans
TRINITY_DN4687_c0_g1_i1.p1	100	67	NA	NA	NA	NA	NA	NA	GF_celegans
TRINITY_DN4488_c0_g3_i1.p2	100	70	NA	NA	NA	NA	NA	NA	GF_celegans
TRINITY_DN23648_c0_g1_i1.p1	100	89	NA	NA	NA	NA	NA	NA	GF_celegans
TRINITY_DN5783_c0_g3_i1.p1	100	77	NA	NA	NA	NA	NA	NA	GF_celegans
TRINITY_DN11080_c0_g1_i1.p1	100	87	NA	NA	NA	NA	NA	NA	GF_celegans
TRINITY_DN2430_c0_g1_i2.p2	100	90	NA	NA	NA	NA	NA	NA	GF_celegans
TRINITY_DN15077_c0_g1_i1.p1	100	90	NA	NA	NA	NA	NA	NA	GF_celegans
TRINITY_DN5180_c0_g1_i1.p2	100	93	NA	NA	NA	NA	NA	NA	GF_celegans
TRINITY_DN17526_c0_g1_i1.p1	100	88	NA	NA	NA	NA	NA	NA	GF_celegans
TRINITY_DN3592_c0_g1_i1.p4	100	75	NA	NA	NA	NA	NA	NA	GF_celegans
TRINITY_DN10393_c0_g1_i1.p1	100	94	NA	NA	NA	NA	NA	NA	GF_celegans
TRINITY_DN16668_c0_g1_i1.p1	100	89	NA	NA	NA	NA	NA	NA	GF_celegans
TRINITY_DN22989_c0_g1_i1.p1	100	86	NA	NA	NA	NA	NA	NA	GF_celegans
TRINITY_DN17531_c0_g1_i1.p2	100	85	NA	NA	NA	NA	NA	NA	GF_celegans
TRINITY_DN9940_c0_g1_i1.p1	100	65	NA	NA	NA	NA	NA	NA	GF_celegans
TRINITY_DN9107_c0_g2_i1.p1	100	66	NA	NA	NA	NA	NA	NA	GF_celegans
TRINITY_DN15229_c0_g1_i1.p1	100	92	NA	NA	NA	NA	NA	NA	GF_celegans
TRINITY_DN10314_c0_g1_i2.p2	100	46	NA	NA	NA	NA	NA	NA	GF_celegans
TRINITY_DN7187_c0_g1_i1.p3	100	55	NA	NA	NA	NA	NA	NA	GF_celegans
TRINITY_DN19668_c0_g1_i1.p1	100	86	NA	NA	NA	NA	NA	NA	GF_celegans
TRINITY_DN2784_c0_g1_i3.p3	100	63	NA	NA	NA	NA	NA	NA	GF_celegans
TRINITY_DN18887_c0_g1_i1.p3	100	54	NA	NA	NA	NA	NA	NA	GF_celegans
TRINITY_DN25481_c0_g1_i1.p1	100	76	NA	NA	NA	NA	NA	NA	GF_celegans
TRINITY_DN15507_c0_g1_i1.p1	100	74	NA	NA	NA	NA	NA	NA	GF_celegans
TRINITY_DN5641_c0_g1_i3.p1	100	74	NA	NA	NA	NA	NA	NA	GF_celegans
TRINITY_DN12939_c0_g1_i2.p1	100	69	NA	NA	NA	NA	NA	NA	GF_celegans
TRINITY_DN8511_c0_g2_i4.p6	100	34	NA	NA	NA	NA	NA	NA	GF_celegans
TRINITY_DN8511_c0_g2_i1.p6	100	34	NA	NA	NA	NA	NA	NA	GF_celegans
TRINITY_DN17753_c0_g1_i1.p1	100	83	NA	NA	NA	NA	NA	NA	GF_celegans
TRINITY_DN838_c0_g1_i2.p2	100	90	NA	NA	NA	NA	NA	NA	GF_celegans
TRINITY_DN785_c0_g1_i1.p1	100	76	NA	NA	NA	NA	NA	NA	GF_celegans
TRINITY_DN2838_c0_g1_i1.p3	100	70	NA	NA	NA	NA	NA	NA	GF_celegans
TRINITY_DN17131_c0_g1_i1.p1	100	87	NA	NA	NA	NA	NA	NA	GF_celegans
TRINITY_DN23394_c0_g1_i1.p1	100	68	NA	NA	NA	NA	NA	NA	GF_celegans
TRINITY_DN9232_c0_g1_i1.p2	100	47	NA	NA	NA	NA	NA	NA	GF_celegans
TRINITY_DN8518_c0_g1_i1.p1	100	68	NA	NA	NA	NA	NA	NA	GF_celegans
TRINITY_DN20108_c0_g1_i1.p2	100	76	NA	NA	NA	NA	NA	NA	GF_celegans
TRINITY_DN7269_c0_g1_i3.p1	100	93	NA	NA	NA	NA	NA	NA	GF_celegans
TRINITY_DN2182_c0_g1_i1.p1	100	99	NA	NA	NA	NA	NA	NA	GF_celegans
TRINITY_DN15220_c0_g1_i1.p1	100	99	NA	NA	NA	NA	NA	NA	GF_celegans
TRINITY_DN900_c0_g2_i1.p3	100	70	NA	NA	NA	NA	NA	NA	GF_celegans
TRINITY_DN6243_c0_g1_i1.p1	100	87	NA	NA	NA	NA	NA	NA	GF_celegans
TRINITY_DN6300_c0_g1_i1.p1	100	89	NA	NA	NA	NA	NA	NA	GF_celegans
TRINITY_DN9062_c0_g1_i1.p2	100	80	NA	NA	NA	NA	NA	NA	GF_celegans
TRINITY_DN24712_c0_g1_i1.p3	100	62	NA	NA	NA	NA	NA	NA	GF_celegans
TRINITY_DN21467_c0_g1_i1.p1	100	58	NA	NA	NA	NA	NA	NA	GF_celegans
TRINITY_DN14053_c0_g1_i1.p4	100	64	NA	NA	NA	NA	NA	NA	GF_celegans
TRINITY_DN197_c0_g2_i1.p2	100	44	NA	NA	NA	NA	NA	NA	GF_celegans
TRINITY_DN16158_c0_g1_i1.p1	100	54	NA	NA	NA	NA	NA	NA	GF_celegans
TRINITY_DN1931_c0_g2_i1.p3	100	64	NA	NA	NA	NA	NA	NA	GF_celegans
TRINITY_DN1143_c0_g1_i1.p3	100	84	NA	NA	NA	NA	NA	NA	GF_celegans
TRINITY_DN3273_c0_g1_i1.p2	100	65	NA	NA	NA	NA	NA	NA	GF_celegans
TRINITY_DN16487_c0_g1_i1.p1	100	55	NA	NA	NA	NA	NA	NA	GF_celegans
TRINITY_DN20438_c0_g1_i1.p1	98.97	97	NA	NA	NA	NA	NA	NA	GF_celegans
TRINITY_DN3439_c0_g2_i1.p5	98.95	95	NA	NA	NA	NA	NA	NA	GF_celegans
TRINITY_DN11703_c0_g1_i1.p1	98.94	94	NA	NA	NA	NA	NA	NA	GF_celegans
TRINITY_DN11981_c0_g3_i1.p1	98.9	91	NA	NA	NA	NA	NA	NA	GF_celegans
TRINITY_DN21474_c0_g1_i1.p1	98.81	84	NA	NA	NA	NA	NA	NA	GF_celegans
TRINITY_DN20647_c0_g1_i1.p2	98.78	82	NA	NA	NA	NA	NA	NA	GF_celegans
TRINITY_DN17219_c0_g1_i1.p1	98.77	81	NA	NA	NA	NA	NA	NA	GF_celegans
TRINITY_DN19876_c0_g1_i1.p1	98.75	80	NA	NA	NA	NA	NA	NA	GF_celegans
TRINITY_DN17485_c0_g1_i1.p2	98.61	72	NA	NA	NA	NA	NA	NA	GF_celegans
TRINITY_DN4199_c0_g1_i2.p1	98.48	66	NA	NA	NA	NA	NA	NA	GF_celegans
TRINITY_DN21434_c0_g1_i1.p1	98.31	59	NA	NA	NA	NA	NA	NA	GF_celegans
TRINITY_DN15261_c0_g1_i1.p1	97.92	96	NA	NA	NA	NA	NA	NA	GF_celegans
TRINITY_DN10502_c0_g1_i1.p1	97.53	81	NA	NA	NA	NA	NA	NA	GF_celegans
TRINITY_DN577_c0_g1_i8.p1	97.3	74	NA	NA	NA	NA	NA	NA	GF_celegans
TRINITY_DN22427_c0_g1_i1.p1	96.55	87	NA	NA	NA	NA	NA	NA	GF_celegans
TRINITY_DN20202_c0_g1_i1.p1	95.83	72	NA	NA	NA	NA	NA	NA	GF_celegans
TRINITY_DN388_c0_g2_i5.p6	95.65	46	NA	NA	NA	NA	NA	NA	GF_celegans
TRINITY_DN13828_c0_g1_i1.p1	95.18	83	NA	NA	NA	NA	NA	NA	GF_celegans
TRINITY_DN23048_c0_g1_i1.p1	95.12	82	NA	NA	NA	NA	NA	NA	GF_celegans
TRINITY_DN4765_c1_g1_i1.p2	94.74	76	NA	NA	NA	NA	NA	NA	GF_celegans
TRINITY_DN21590_c0_g1_i1.p2	94.25	87	NA	NA	NA	NA	NA	NA	GF_celegans
TRINITY_DN8310_c0_g1_i1.p1	93.33	90	NA	NA	NA	NA	NA	NA	GF_celegans
TRINITY_DN15803_c0_g1_i1.p1	93.33	75	NA	NA	NA	NA	NA	NA	GF_celegans
TRINITY_DN4957_c0_g1_i12.p1	92.96	71	NA	NA	NA	NA	NA	NA	GF_celegans
TRINITY_DN8027_c0_g2_i1.p1	91.95	87	NA	NA	NA	NA	NA	NA	GF_celegans
TRINITY_DN9735_c0_g2_i2.p1	91.86	86	NA	NA	NA	NA	NA	NA	GF_celegans
TRINITY_DN16627_c0_g1_i1.p1	91.84	98	NA	NA	NA	NA	NA	NA	GF_celegans
TRINITY_DN2850_c0_g1_i1.p1	91.04	67	NA	NA	NA	NA	NA	NA	GF_celegans
TRINITY_DN19557_c0_g1_i1.p2	89.39	66	NA	NA	NA	NA	NA	NA	GF_celegans
TRINITY_DN7126_c0_g1_i1.p1	89.13	92	NA	NA	NA	NA	NA	NA	GF_celegans
TRINITY_DN23261_c0_g1_i1.p1	89.09	55	NA	NA	NA	NA	NA	NA	GF_celegans
TRINITY_DN15213_c0_g1_i1.p2	89.01	91	NA	NA	NA	NA	NA	NA	GF_celegans
TRINITY_DN5235_c0_g2_i1.p1	88.17	93	NA	NA	NA	NA	NA	NA	GF_celegans
TRINITY_DN23730_c0_g1_i1.p1	88.06	67	NA	NA	NA	NA	NA	NA	GF_celegans
TRINITY_DN23187_c0_g1_i1.p2	87.91	91	NA	NA	NA	NA	NA	NA	GF_celegans
TRINITY_DN24300_c0_g1_i1.p1	87.88	99	NA	NA	NA	NA	NA	NA	GF_celegans
TRINITY_DN11223_c0_g2_i4.p1	87.64	89	NA	NA	NA	NA	NA	NA	GF_celegans
TRINITY_DN9083_c0_g2_i1.p1	86.96	46	NA	NA	NA	NA	NA	NA	GF_celegans
TRINITY_DN13335_c0_g1_i1.p1	85.9	78	NA	NA	NA	NA	NA	NA	GF_celegans
TRINITY_DN24467_c0_g1_i1.p1	85.9	78	NA	NA	NA	NA	NA	NA	GF_celegans
TRINITY_DN3269_c0_g1_i5.p2	85.71	91	NA	NA	NA	NA	NA	NA	GF_celegans
TRINITY_DN25413_c0_g1_i1.p1	84.71	85	NA	NA	NA	NA	NA	NA	GF_celegans
TRINITY_DN15156_c0_g1_i1.p3	84	50	NA	NA	NA	NA	NA	NA	GF_celegans
TRINITY_DN9890_c0_g1_i2.p1	83.87	93	NA	NA	NA	NA	NA	NA	GF_celegans
TRINITY_DN8137_c0_g1_i1.p1	83.54	79	NA	NA	NA	NA	NA	NA	GF_celegans
TRINITY_DN20690_c0_g1_i1.p2	81.58	76	NA	NA	NA	NA	NA	NA	GF_celegans
TRINITY_DN24919_c0_g1_i1.p2	80.68	88	NA	NA	NA	NA	NA	NA	GF_celegans
TRINITY_DN9042_c0_g1_i1.p1	78.26	92	NA	NA	NA	NA	NA	NA	GF_celegans
TRINITY_DN11328_c0_g1_i1.p2	74.32	74	NA	NA	NA	NA	NA	NA	GF_celegans
TRINITY_DN10823_c0_g1_i2.p2	74.12	85	NA	NA	NA	NA	NA	NA	GF_celegans
TRINITY_DN11315_c0_g1_i3.p8	73.68	57	NA	NA	NA	NA	NA	NA	GF_celegans
TRINITY_DN8258_c0_g1_i1.p2	72.73	88	NA	NA	NA	NA	NA	NA	GF_celegans
TRINITY_DN1671_c0_g1_i1.p4	72.46	69	NA	NA	NA	NA	NA	NA	GF_celegans
TRINITY_DN21410_c0_g1_i1.p2	72	75	NA	NA	NA	NA	NA	NA	GF_celegans
TRINITY_DN5014_c0_g2_i1.p4	71.74	92	NA	NA	NA	NA	NA	NA	GF_celegans
TRINITY_DN23342_c0_g1_i1.p1	71.43	98	NA	NA	NA	NA	NA	NA	GF_celegans
TRINITY_DN3353_c0_g1_i2.p1	70.27	74	NA	NA	NA	NA	NA	NA	GF_celegans
TRINITY_DN5498_c0_g1_i1.p4	70.18	57	NA	NA	NA	NA	NA	NA	GF_celegans
TRINITY_DN18359_c0_g1_i1.p1	69.57	46	NA	NA	NA	NA	NA	NA	GF_celegans
TRINITY_DN13533_c0_g1_i1.p1	67.02	94	NA	NA	NA	NA	NA	NA	GF_celegans
TRINITY_DN4502_c0_g1_i1.p1	66.67	75	NA	NA	NA	NA	NA	NA	GF_celegans
TRINITY_DN25759_c0_g1_i1.p1	66.67	96	NA	NA	NA	NA	NA	NA	GF_celegans
TRINITY_DN1112_c0_g1_i4.p1	66.32	95	NA	NA	NA	NA	NA	NA	GF_celegans
TRINITY_DN7543_c0_g1_i1.p1	65.93	91	NA	NA	NA	NA	NA	NA	GF_celegans
TRINITY_DN10961_c0_g1_i1.p2	65.91	88	NA	NA	NA	NA	NA	NA	GF_celegans
TRINITY_DN24288_c0_g1_i1.p3	64.86	74	NA	NA	NA	NA	NA	NA	GF_celegans
TRINITY_DN18779_c0_g1_i1.p1	63.64	99	NA	NA	NA	NA	NA	NA	GF_celegans
TRINITY_DN17732_c0_g1_i1.p2	62.5	80	NA	NA	NA	NA	NA	NA	GF_celegans
TRINITY_DN14582_c0_g1_i1.p1	61.8	89	NA	NA	NA	NA	NA	NA	GF_celegans
TRINITY_DN5369_c0_g3_i1.p3	58.82	68	NA	NA	NA	NA	NA	NA	GF_celegans
TRINITY_DN10890_c0_g1_i1.p1	58.14	86	NA	NA	NA	NA	NA	NA	GF_celegans
TRINITY_DN1092_c0_g1_i1.p1	57.14	91	NA	NA	NA	NA	NA	NA	GF_celegans
TRINITY_DN3281_c0_g1_i5.p2	57.14	77	NA	NA	NA	NA	NA	NA	GF_celegans
TRINITY_DN14194_c0_g1_i1.p1	56.04	91	NA	NA	NA	NA	NA	NA	GF_celegans
TRINITY_DN3036_c0_g1_i1.p4	56	50	NA	NA	NA	NA	NA	NA	GF_celegans
TRINITY_DN2843_c0_g1_i1.p1	55.67	97	NA	NA	NA	NA	NA	NA	GF_celegans
TRINITY_DN10366_c0_g1_i1.p4	55.56	72	NA	NA	NA	NA	NA	NA	GF_celegans
TRINITY_DN9707_c0_g1_i1.p2	52.63	76	NA	NA	NA	NA	NA	NA	GF_celegans
TRINITY_DN17267_c0_g1_i1.p2	51.58	95	NA	NA	NA	NA	NA	NA	GF_celegans
TRINITY_DN1586_c0_g4_i1.p6	51.55	97	NA	NA	NA	NA	NA	NA	GF_celegans
TRINITY_DN4212_c0_g1_i2.p4	51.11	90	NA	NA	NA	NA	NA	NA	GF_celegans
TRINITY_DN17110_c0_g1_i1.p1	49.23	65	NA	NA	NA	NA	NA	NA	GF_celegans
TRINITY_DN4992_c0_g1_i1.p1	47.69	65	NA	NA	NA	NA	NA	NA	GF_celegans
TRINITY_DN245_c0_g1_i6.p4	44.07	59	NA	NA	NA	NA	NA	NA	GF_celegans
TRINITY_DN10080_c0_g1_i5.p9	38.27	81	NA	NA	NA	NA	NA	NA	GF_celegans
TRINITY_DN7309_c0_g1_i1.p5	37.8	82	NA	NA	NA	NA	NA	NA	GF_celegans
TRINITY_DN13379_c0_g1_i1.p2	37.5	96	NA	NA	NA	NA	NA	NA	GF_celegans
TRINITY_DN6670_c0_g1_i2.p1	37.11	97	NA	NA	NA	NA	NA	NA	GF_celegans
TRINITY_DN6697_c0_g1_i1.p1	36.84	95	NA	NA	NA	NA	NA	NA	GF_celegans
TRINITY_DN10076_c0_g1_i1.p3	36.49	74	NA	NA	NA	NA	NA	NA	GF_celegans
TRINITY_DN10533_c0_g3_i1.p5	36	75	NA	NA	NA	NA	NA	NA	GF_celegans
TRINITY_DN16877_c0_g1_i1.p3	33.33	96	NA	NA	NA	NA	NA	NA	GF_celegans
TRINITY_DN2396_c0_g1_i2.p7	29.21	89	NA	NA	NA	NA	NA	NA	GF_celegans
TRINITY_DN2293_c0_g1_i1.p2	28.74	87	NA	NA	NA	NA	NA	NA	GF_celegans
TRINITY_DN245_c0_g1_i1.p4	28.57	91	NA	NA	NA	NA	NA	NA	GF_celegans
TRINITY_DN2117_c0_g1_i1.p5	26.67	90	NA	NA	NA	NA	NA	NA	GF_celegans
TRINITY_GG_12284_c0_g1_i1.p2	100	82	SPROCEL9545	100	83	83	87	5.18e-54	GG_celegans
TRINITY_GG_8924_c0_g1_i1.p1	100	63	SPROCEL9526	100	64	64	64	2.79e-41	GG_celegans
TRINITY_GG_14004_c0_g1_i1.p2	100	85	SPROCEL9454	100	86	86	86	1.11e-61	GG_celegans
TRINITY_GG_6195_c0_g1_i1.p1	100	70	SPROCEL9449	100	71	71	71	2.05e-45	GG_celegans
TRINITY_GG_4806_c0_g1_i1.p1	100	80	SPROCEL9447	100	81	81	81	1.86e-55	GG_celegans
TRINITY_GG_15303_c0_g1_i1.p1	100	84	SPROCEL9443	100	85	85	85	4.12e-60	GG_celegans
TRINITY_GG_569_c0_g1_i1.p1	100	93	SPROCEL9435	100	94	94	98	2.95e-67	GG_celegans
TRINITY_GG_16393_c0_g1_i1.p1	100	95	SPROCEL9394	100	96	96	96	9.77e-70	GG_celegans
TRINITY_GG_8147_c0_g1_i1.p1	100	97	SPROCEL9050	100	98	98	98	4.45e-63	GG_celegans
TRINITY_GG_23226_c0_g1_i1.p1	100	73	SPROCEL8951	100	74	74	74	3.44e-51	GG_celegans
TRINITY_GG_7856_c0_g1_i1.p2	100	79	SPROCEL8939	100	80	80	80	1.29e-54	GG_celegans
TRINITY_GG_19185_c0_g1_i1.p2	100	64	SPROCEL8627	100	65	65	69	3.26e-44	GG_celegans
TRINITY_GG_1010_c0_g1_i1.p1	100	88	SPROCEL8602	100	89	89	89	5.97e-62	GG_celegans
TRINITY_GG_18729_c0_g1_i1.p1	100	86	SPROCEL8481	100	87	87	87	1.24e-58	GG_celegans
TRINITY_GG_10435_c0_g1_i1.p2	100	77	SPROCEL8436	100	78	78	78	7.25e-54	GG_celegans
TRINITY_GG_10044_c0_g1_i1.p1	100	82	SPROCEL8280	100	83	83	83	5e-52	GG_celegans
TRINITY_GG_13972_c0_g1_i1.p1	100	78	SPROCEL8141	100	79	79	83	2.17e-54	GG_celegans
TRINITY_GG_8419_c0_g1_i1.p1	100	76	SPROCEL8111	100	77	77	77	6.82e-54	GG_celegans
TRINITY_GG_20921_c0_g1_i1.p1	100	69	SPROCEL8074	100	70	70	70	2.15e-46	GG_celegans
TRINITY_GG_3156_c0_g1_i1.p2	100	94	SPROCEL8054	100	95	95	95	1.41e-69	GG_celegans
TRINITY_GG_17105_c0_g1_i1.p1	100	85	SPROCEL7981	100	86	86	86	1.81e-59	GG_celegans
TRINITY_GG_6085_c0_g1_i1.p1	100	84	SPROCEL793	100	100	100	101	2.64e-69	GG_celegans
TRINITY_GG_21420_c0_g1_i1.p6	100	56	SPROCEL7770	100	54	54	57	8.24e-36	GG_celegans
TRINITY_GG_4741_c0_g1_i1.p2	100	74	SPROCEL7667	100	75	75	75	3.98e-46	GG_celegans
TRINITY_GG_5632_c0_g1_i1.p1	100	99	SPROCEL7650	100	100	100	100	5.13e-71	GG_celegans
TRINITY_GG_6950_c0_g1_i1.p1	100	98	SPROCEL7603	100	99	99	99	1.34e-67	GG_celegans
TRINITY_GG_7141_c0_g1_i1.p2	100	80	SPROCEL7553	100	81	81	85	5.23e-43	GG_celegans
TRINITY_GG_2748_c0_g1_i1.p1	100	94	SPROCEL7466	100	95	95	95	1.43e-65	GG_celegans
TRINITY_GG_15303_c0_g1_i1.p1	100	84	SPROCEL6678	100	85	89	85	2.29e-60	GG_celegans
TRINITY_GG_8147_c0_g1_i1.p1	100	97	SPROCEL6320	100	94	94	98	3.48e-60	GG_celegans
TRINITY_GG_23226_c0_g1_i1.p1	100	73	SPROCEL5396	100	71	71	74	6.74e-49	GG_celegans
TRINITY_GG_6195_c0_g1_i1.p1	100	70	SPROCEL5264	100	67	67	71	3.95e-42	GG_celegans
TRINITY_GG_15461_c0_g1_i1.p1	100	90	SPROCEL5034	100	91	98	91	5.03e-63	GG_celegans
TRINITY_GG_15303_c0_g1_i1.p1	100	84	SPROCEL4172	100	85	87	85	2.89e-60	GG_celegans
TRINITY_GG_1010_c0_g1_i1.p1	100	88	SPROCEL3575	100	86	86	89	1.12e-59	GG_celegans
TRINITY_GG_19754_c0_g1_i1.p1	100	86	SPROCEL2443	100	85	85	87	1.47e-58	GG_celegans
TRINITY_GG_7233_c0_g1_i1.p4	100	84	SPROCEL227	100	85	88	85	3.72e-53	GG_celegans
TRINITY_GG_3156_c0_g1_i1.p2	100	94	SPROCEL2265	100	95	100	95	1.38e-69	GG_celegans
TRINITY_GG_2172_c1_g1_i1.p2	100	83	SPROCEL18894	100	81	81	84	9.5e-57	GG_celegans
TRINITY_GG_17960_c0_g1_i1.p1	100	99	SPROCEL18795	100	98	98	100	2.72e-68	GG_celegans
TRINITY_GG_7843_c0_g1_i1.p1	100	82	SPROCEL18640	100	79	79	83	1.59e-55	GG_celegans
TRINITY_GG_15379_c0_g1_i1.p1	100	68	SPROCEL18543	100	83	85	83	4.01e-57	GG_celegans
TRINITY_GG_5971_c1_g1_i1.p1	100	97	SPROCEL17333	100	97	97	98	8.67e-68	GG_celegans
TRINITY_GG_21420_c0_g1_i1.p6	100	56	SPROCEL17101	100	56	56	57	3.29e-37	GG_celegans
TRINITY_GG_8430_c0_g1_i1.p1	100	89	SPROCEL16807	100	87	87	90	8.25e-61	GG_celegans
TRINITY_GG_6950_c0_g1_i1.p1	100	98	SPROCEL16413	100	95	95	99	4.08e-64	GG_celegans
TRINITY_GG_19992_c0_g1_i1.p1	100	92	SPROCEL16195	100	93	95	93	4.49e-62	GG_celegans
TRINITY_GG_6195_c0_g1_i1.p1	100	70	SPROCEL14959	100	71	73	71	1.7e-45	GG_celegans
TRINITY_GG_23226_c0_g1_i1.p1	100	73	SPROCEL14613	100	73	73	74	2.81e-50	GG_celegans
TRINITY_GG_7856_c0_g1_i1.p1	100	89	SPROCEL13429	100	90	90	90	1.03e-61	GG_celegans
TRINITY_GG_9774_c0_g1_i1.p3	100	64	SPROCEL13208	100	65	65	65	1.35e-44	GG_celegans
TRINITY_GG_18630_c1_g1_i1.p3	100	70	SPROCEL12911	100	71	71	75	4.63e-51	GG_celegans
TRINITY_GG_19828_c0_g1_i1.p3	100	87	SPROCEL12774	100	88	88	88	3.44e-61	GG_celegans
TRINITY_GG_11770_c0_g1_i1.p1	100	95	SPROCEL12683	100	96	96	100	4.18e-66	GG_celegans
TRINITY_GG_11185_c0_g1_i1.p1	100	85	SPROCEL12641	100	86	86	90	6.45e-63	GG_celegans
TRINITY_GG_15461_c0_g1_i1.p1	100	90	SPROCEL12631	100	91	91	91	4.84e-63	GG_celegans
TRINITY_GG_3451_c0_g1_i1.p1	100	80	SPROCEL12628	100	81	81	81	6.65e-55	GG_celegans
TRINITY_GG_8031_c1_g1_i1.p1	100	94	SPROCEL12585	100	95	95	95	1.2e-64	GG_celegans
TRINITY_GG_20999_c0_g1_i1.p2	100	75	SPROCEL12545	100	76	76	76	4.64e-53	GG_celegans
TRINITY_GG_7840_c0_g1_i1.p3	100	89	SPROCEL12540	100	90	90	90	1.43e-64	GG_celegans
TRINITY_GG_20948_c0_g1_i1.p2	100	90	SPROCEL12532	100	91	91	91	3.21e-64	GG_celegans
TRINITY_GG_7843_c0_g1_i1.p1	100	82	SPROCEL12500	100	83	83	83	1.84e-58	GG_celegans
TRINITY_GG_13576_c0_g1_i1.p3	100	79	SPROCEL12491	100	80	80	80	2.81e-52	GG_celegans
TRINITY_GG_8043_c0_g1_i1.p2	100	85	SPROCEL12489	100	86	86	86	3.33e-60	GG_celegans
TRINITY_GG_19992_c0_g1_i1.p1	100	92	SPROCEL12483	100	93	93	93	5.31e-62	GG_celegans
TRINITY_GG_17960_c0_g1_i1.p1	100	99	SPROCEL12431	100	100	100	100	6.7e-70	GG_celegans
TRINITY_GG_3156_c1_g1_i1.p3	100	78	SPROCEL12409	100	79	79	79	1.41e-53	GG_celegans
TRINITY_GG_3521_c0_g1_i1.p1	100	80	SPROCEL12401	100	81	81	81	1.24e-54	GG_celegans
TRINITY_GG_8430_c0_g1_i1.p1	100	89	SPROCEL12226	100	90	90	90	1.08e-63	GG_celegans
TRINITY_GG_18989_c0_g1_i1.p1	100	99	SPROCEL12195	100	100	100	104	1.55e-70	GG_celegans
TRINITY_GG_2904_c2_g1_i1.p2	100	79	SPROCEL12023	100	80	80	80	1.99e-50	GG_celegans
TRINITY_GG_2172_c1_g1_i1.p2	100	83	SPROCEL12022	100	80	80	84	5.7e-56	GG_celegans
TRINITY_GG_21328_c0_g1_i1.p2	100	99	SPROCEL11679	100	100	100	100	3.82e-74	GG_celegans
TRINITY_GG_16612_c0_g1_i1.p1	100	72	SPROCEL11642	100	73	73	73	6.72e-50	GG_celegans
TRINITY_GG_20999_c0_g1_i1.p2	100	75	SPROCEL1144	100	72	72	76	6.29e-50	GG_celegans
TRINITY_GG_14863_c2_g1_i1.p2	100	73	SPROCEL11347	100	74	74	74	1.2e-49	GG_celegans
TRINITY_GG_7983_c0_g1_i1.p1	100	82	SPROCEL11305	100	83	83	83	3.94e-57	GG_celegans
TRINITY_GG_6195_c0_g1_i1.p1	100	70	SPROCEL1127	100	69	69	71	2.03e-43	GG_celegans
TRINITY_GG_13005_c1_g1_i1.p1	100	96	SPROCEL11252	100	97	97	97	3.45e-65	GG_celegans
TRINITY_GG_19754_c0_g1_i1.p1	100	86	SPROCEL11246	100	87	87	87	6.92e-60	GG_celegans
TRINITY_GG_22956_c0_g1_i1.p1	100	96	SPROCEL11214	100	97	97	97	2.77e-68	GG_celegans
TRINITY_GG_10695_c0_g1_i1.p1	100	92	SPROCEL11201	100	93	93	93	6.92e-65	GG_celegans
TRINITY_GG_8203_c1_g1_i1.p1	100	92	SPROCEL11184	100	93	93	96	2.59e-65	GG_celegans
TRINITY_GG_20405_c0_g1_i1.p1	100	98	SPROCEL11138	100	99	99	103	5.34e-72	GG_celegans
TRINITY_GG_13537_c0_g1_i1.p2	100	78	SPROCEL11115	100	79	79	83	3.92e-55	GG_celegans
TRINITY_GG_7233_c0_g1_i1.p4	100	84	SPROCEL11111	100	85	85	85	3.55e-53	GG_celegans
TRINITY_GG_7233_c0_g1_i1.p4	100	84	SPROCEL11110	100	85	85	85	3.55e-53	GG_celegans
TRINITY_GG_6630_c0_g1_i1.p1	100	91	SPROCEL11072	100	92	92	92	4.51e-63	GG_celegans
TRINITY_GG_19260_c1_g1_i1.p1	100	87	SPROCEL10858	100	88	88	88	9.24e-64	GG_celegans
TRINITY_GG_10688_c1_g1_i1.p2	100	62	SPROCEL10848	100	63	63	63	1.14e-41	GG_celegans
TRINITY_GG_22676_c0_g1_i1.p1	100	93	SPROCEL10770	100	94	94	94	2.91e-63	GG_celegans
TRINITY_GG_4698_c1_g1_i1.p1	100	88	SPROCEL10417	100	89	89	89	8.03e-62	GG_celegans
TRINITY_GG_5971_c1_g1_i1.p1	100	97	SPROCEL10213	100	98	98	98	1.12e-68	GG_celegans
TRINITY_GG_21420_c0_g1_i1.p6	100	56	SPROCEL10200	100	57	57	57	5.19e-38	GG_celegans
TRINITY_GG_2904_c2_g1_i1.p2	100	79	SPROCEL1019	100	76	76	80	3.79e-47	GG_celegans
TRINITY_GG_15038_c0_g1_i1.p2	100	88	SPROCEL10152	100	89	89	93	8.07e-61	GG_celegans
TRINITY_GG_18095_c0_g1_i1.p1	100	94	NA	NA	NA	NA	NA	NA	GG_celegans
TRINITY_GG_21812_c0_g1_i1.p1	100	73	NA	NA	NA	NA	NA	NA	GG_celegans
TRINITY_GG_1682_c0_g1_i1.p1	100	78	NA	NA	NA	NA	NA	NA	GG_celegans
TRINITY_GG_2901_c0_g1_i1.p1	100	90	NA	NA	NA	NA	NA	NA	GG_celegans
TRINITY_GG_10583_c0_g1_i1.p2	100	50	NA	NA	NA	NA	NA	NA	GG_celegans
TRINITY_GG_10587_c0_g1_i3.p1	100	75	NA	NA	NA	NA	NA	NA	GG_celegans
TRINITY_GG_19269_c0_g1_i1.p2	100	59	NA	NA	NA	NA	NA	NA	GG_celegans
TRINITY_GG_7688_c0_g1_i2.p2	100	72	NA	NA	NA	NA	NA	NA	GG_celegans
TRINITY_GG_7688_c1_g1_i1.p3	100	65	NA	NA	NA	NA	NA	NA	GG_celegans
TRINITY_GG_19262_c0_g1_i1.p1	100	69	NA	NA	NA	NA	NA	NA	GG_celegans
TRINITY_GG_7675_c0_g1_i1.p3	100	75	NA	NA	NA	NA	NA	NA	GG_celegans
TRINITY_GG_6974_c0_g1_i1.p1	100	82	NA	NA	NA	NA	NA	NA	GG_celegans
TRINITY_GG_8285_c0_g1_i1.p3	100	97	NA	NA	NA	NA	NA	NA	GG_celegans
TRINITY_GG_252_c0_g1_i1.p1	100	69	NA	NA	NA	NA	NA	NA	GG_celegans
TRINITY_GG_16532_c0_g1_i1.p1	100	95	NA	NA	NA	NA	NA	NA	GG_celegans
TRINITY_GG_20833_c0_g1_i5.p7	100	66	NA	NA	NA	NA	NA	NA	GG_celegans
TRINITY_GG_20833_c0_g1_i2.p4	100	74	NA	NA	NA	NA	NA	NA	GG_celegans
TRINITY_GG_7003_c1_g1_i2.p1	100	86	NA	NA	NA	NA	NA	NA	GG_celegans
TRINITY_GG_16919_c0_g1_i1.p1	100	67	NA	NA	NA	NA	NA	NA	GG_celegans
TRINITY_GG_1081_c0_g1_i1.p1	100	91	NA	NA	NA	NA	NA	NA	GG_celegans
TRINITY_GG_15302_c0_g1_i1.p1	100	64	NA	NA	NA	NA	NA	NA	GG_celegans
TRINITY_GG_3199_c0_g1_i1.p2	100	62	NA	NA	NA	NA	NA	NA	GG_celegans
TRINITY_GG_16895_c0_g1_i1.p1	100	85	NA	NA	NA	NA	NA	NA	GG_celegans
TRINITY_GG_2655_c0_g1_i1.p1	100	62	NA	NA	NA	NA	NA	NA	GG_celegans
TRINITY_GG_6918_c0_g1_i1.p1	100	78	NA	NA	NA	NA	NA	NA	GG_celegans
TRINITY_GG_6927_c0_g1_i1.p1	100	75	NA	NA	NA	NA	NA	NA	GG_celegans
TRINITY_GG_6948_c0_g1_i1.p2	100	72	NA	NA	NA	NA	NA	NA	GG_celegans
TRINITY_GG_19131_c0_g1_i1.p2	100	75	NA	NA	NA	NA	NA	NA	GG_celegans
TRINITY_GG_6921_c1_g1_i1.p1	100	89	NA	NA	NA	NA	NA	NA	GG_celegans
TRINITY_GG_11839_c0_g1_i1.p1	100	79	NA	NA	NA	NA	NA	NA	GG_celegans
TRINITY_GG_151_c0_g1_i1.p1	100	79	NA	NA	NA	NA	NA	NA	GG_celegans
TRINITY_GG_167_c0_g1_i1.p2	100	79	NA	NA	NA	NA	NA	NA	GG_celegans
TRINITY_GG_11829_c0_g1_i1.p2	100	79	NA	NA	NA	NA	NA	NA	GG_celegans
TRINITY_GG_2647_c0_g1_i1.p1	100	71	NA	NA	NA	NA	NA	NA	GG_celegans
TRINITY_GG_16772_c1_g1_i1.p1	100	82	NA	NA	NA	NA	NA	NA	GG_celegans
TRINITY_GG_7603_c0_g1_i1.p2	100	70	NA	NA	NA	NA	NA	NA	GG_celegans
TRINITY_GG_18542_c0_g1_i1.p4	100	66	NA	NA	NA	NA	NA	NA	GG_celegans
TRINITY_GG_4103_c0_g1_i1.p1	100	95	NA	NA	NA	NA	NA	NA	GG_celegans
TRINITY_GG_21924_c2_g1_i1.p1	100	75	NA	NA	NA	NA	NA	NA	GG_celegans
TRINITY_GG_5309_c0_g1_i1.p1	100	92	NA	NA	NA	NA	NA	NA	GG_celegans
TRINITY_GG_4989_c0_g1_i1.p1	100	90	NA	NA	NA	NA	NA	NA	GG_celegans
TRINITY_GG_1002_c0_g1_i1.p1	100	97	NA	NA	NA	NA	NA	NA	GG_celegans
TRINITY_GG_677_c0_g1_i1.p1	100	59	NA	NA	NA	NA	NA	NA	GG_celegans
TRINITY_GG_187_c0_g1_i1.p1	100	71	NA	NA	NA	NA	NA	NA	GG_celegans
TRINITY_GG_8517_c0_g1_i1.p1	100	93	NA	NA	NA	NA	NA	NA	GG_celegans
TRINITY_GG_1230_c0_g1_i2.p1	100	84	NA	NA	NA	NA	NA	NA	GG_celegans
TRINITY_GG_17103_c0_g1_i1.p4	100	36	NA	NA	NA	NA	NA	NA	GG_celegans
TRINITY_GG_75_c0_g1_i1.p1	100	96	NA	NA	NA	NA	NA	NA	GG_celegans
TRINITY_GG_3711_c0_g1_i1.p1	100	64	NA	NA	NA	NA	NA	NA	GG_celegans
TRINITY_GG_5047_c0_g1_i1.p1	100	67	NA	NA	NA	NA	NA	NA	GG_celegans
TRINITY_GG_16536_c0_g1_i1.p1	100	99	NA	NA	NA	NA	NA	NA	GG_celegans
TRINITY_GG_16543_c0_g1_i1.p1	100	34	NA	NA	NA	NA	NA	NA	GG_celegans
TRINITY_GG_12461_c0_g1_i1.p2	100	78	NA	NA	NA	NA	NA	NA	GG_celegans
TRINITY_GG_18150_c0_g1_i1.p1	100	93	NA	NA	NA	NA	NA	NA	GG_celegans
TRINITY_GG_5757_c0_g1_i1.p2	100	78	NA	NA	NA	NA	NA	NA	GG_celegans
TRINITY_GG_13844_c1_g1_i1.p1	100	66	NA	NA	NA	NA	NA	NA	GG_celegans
TRINITY_GG_13856_c0_g1_i1.p2	100	55	NA	NA	NA	NA	NA	NA	GG_celegans
TRINITY_GG_11775_c2_g1_i1.p2	100	24	NA	NA	NA	NA	NA	NA	GG_celegans
TRINITY_GG_21908_c0_g1_i1.p1	100	74	NA	NA	NA	NA	NA	NA	GG_celegans
TRINITY_GG_2355_c0_g1_i1.p2	100	38	NA	NA	NA	NA	NA	NA	GG_celegans
TRINITY_GG_3171_c0_g1_i1.p2	100	83	NA	NA	NA	NA	NA	NA	GG_celegans
TRINITY_GG_5406_c0_g1_i2.p1	100	85	NA	NA	NA	NA	NA	NA	GG_celegans
TRINITY_GG_18737_c0_g1_i1.p2	100	73	NA	NA	NA	NA	NA	NA	GG_celegans
TRINITY_GG_7183_c0_g1_i1.p1	100	73	NA	NA	NA	NA	NA	NA	GG_celegans
TRINITY_GG_7199_c0_g1_i2.p1	100	73	NA	NA	NA	NA	NA	NA	GG_celegans
TRINITY_GG_7165_c0_g1_i1.p1	100	73	NA	NA	NA	NA	NA	NA	GG_celegans
TRINITY_GG_18761_c0_g1_i1.p1	100	92	NA	NA	NA	NA	NA	NA	GG_celegans
TRINITY_GG_8775_c0_g1_i1.p1	100	60	NA	NA	NA	NA	NA	NA	GG_celegans
TRINITY_GG_19240_c0_g1_i1.p2	100	82	NA	NA	NA	NA	NA	NA	GG_celegans
TRINITY_GG_18122_c0_g1_i1.p1	100	74	NA	NA	NA	NA	NA	NA	GG_celegans
TRINITY_GG_6104_c0_g1_i1.p1	100	95	NA	NA	NA	NA	NA	NA	GG_celegans
TRINITY_GG_1393_c0_g1_i1.p1	100	69	NA	NA	NA	NA	NA	NA	GG_celegans
TRINITY_GG_1409_c0_g1_i1.p1	100	70	NA	NA	NA	NA	NA	NA	GG_celegans
TRINITY_GG_6721_c0_g1_i1.p2	100	61	NA	NA	NA	NA	NA	NA	GG_celegans
TRINITY_GG_2027_c0_g1_i1.p1	100	86	NA	NA	NA	NA	NA	NA	GG_celegans
TRINITY_GG_4260_c0_g1_i2.p1	100	75	NA	NA	NA	NA	NA	NA	GG_celegans
TRINITY_GG_1437_c0_g1_i1.p2	100	93	NA	NA	NA	NA	NA	NA	GG_celegans
TRINITY_GG_8223_c0_g1_i1.p1	100	66	NA	NA	NA	NA	NA	NA	GG_celegans
TRINITY_GG_5389_c0_g1_i1.p3	100	50	NA	NA	NA	NA	NA	NA	GG_celegans
TRINITY_GG_8488_c0_g1_i1.p1	100	69	NA	NA	NA	NA	NA	NA	GG_celegans
TRINITY_GG_4287_c0_g1_i2.p1	100	73	NA	NA	NA	NA	NA	NA	GG_celegans
TRINITY_GG_4287_c0_g1_i1.p1	100	73	NA	NA	NA	NA	NA	NA	GG_celegans
TRINITY_GG_15609_c0_g1_i1.p2	100	71	NA	NA	NA	NA	NA	NA	GG_celegans
TRINITY_GG_4552_c0_g1_i1.p1	100	95	NA	NA	NA	NA	NA	NA	GG_celegans
TRINITY_GG_16676_c0_g1_i1.p2	100	67	NA	NA	NA	NA	NA	NA	GG_celegans
TRINITY_GG_18228_c0_g1_i1.p1	100	91	NA	NA	NA	NA	NA	NA	GG_celegans
TRINITY_GG_18846_c0_g1_i1.p1	100	94	NA	NA	NA	NA	NA	NA	GG_celegans
TRINITY_GG_18852_c0_g1_i1.p1	100	88	NA	NA	NA	NA	NA	NA	GG_celegans
TRINITY_GG_18868_c0_g1_i1.p1	100	91	NA	NA	NA	NA	NA	NA	GG_celegans
TRINITY_GG_13428_c2_g1_i1.p1	100	76	NA	NA	NA	NA	NA	NA	GG_celegans
TRINITY_GG_607_c0_g1_i1.p2	100	89	NA	NA	NA	NA	NA	NA	GG_celegans
TRINITY_GG_7341_c0_g1_i1.p2	100	66	NA	NA	NA	NA	NA	NA	GG_celegans
TRINITY_GG_7334_c1_g1_i1.p1	100	51	NA	NA	NA	NA	NA	NA	GG_celegans
TRINITY_GG_7222_c0_g1_i1.p1	100	96	NA	NA	NA	NA	NA	NA	GG_celegans
TRINITY_GG_13759_c1_g1_i1.p1	100	76	NA	NA	NA	NA	NA	NA	GG_celegans
TRINITY_GG_7131_c0_g1_i1.p1	100	56	NA	NA	NA	NA	NA	NA	GG_celegans
TRINITY_GG_16049_c0_g1_i1.p1	100	70	NA	NA	NA	NA	NA	NA	GG_celegans
TRINITY_GG_3565_c0_g1_i1.p1	100	96	NA	NA	NA	NA	NA	NA	GG_celegans
TRINITY_GG_5545_c0_g1_i1.p1	100	73	NA	NA	NA	NA	NA	NA	GG_celegans
TRINITY_GG_22080_c0_g1_i1.p1	100	60	NA	NA	NA	NA	NA	NA	GG_celegans
TRINITY_GG_11545_c0_g1_i1.p1	100	60	NA	NA	NA	NA	NA	NA	GG_celegans
TRINITY_GG_15183_c0_g1_i1.p1	100	71	NA	NA	NA	NA	NA	NA	GG_celegans
TRINITY_GG_15197_c0_g1_i1.p1	100	61	NA	NA	NA	NA	NA	NA	GG_celegans
TRINITY_GG_12058_c0_g1_i1.p2	100	68	NA	NA	NA	NA	NA	NA	GG_celegans
TRINITY_GG_14012_c0_g1_i1.p1	100	92	NA	NA	NA	NA	NA	NA	GG_celegans
TRINITY_GG_13099_c1_g1_i1.p2	100	72	NA	NA	NA	NA	NA	NA	GG_celegans
TRINITY_GG_21215_c0_g1_i1.p3	100	59	NA	NA	NA	NA	NA	NA	GG_celegans
TRINITY_GG_3910_c0_g1_i1.p1	100	84	NA	NA	NA	NA	NA	NA	GG_celegans
TRINITY_GG_10892_c0_g1_i1.p1	100	41	NA	NA	NA	NA	NA	NA	GG_celegans
TRINITY_GG_8252_c0_g1_i1.p1	100	68	NA	NA	NA	NA	NA	NA	GG_celegans
TRINITY_GG_10527_c0_g1_i1.p2	100	99	NA	NA	NA	NA	NA	NA	GG_celegans
TRINITY_GG_4228_c0_g1_i1.p1	100	97	NA	NA	NA	NA	NA	NA	GG_celegans
TRINITY_GG_22470_c0_g1_i1.p1	100	79	NA	NA	NA	NA	NA	NA	GG_celegans
TRINITY_GG_10632_c0_g1_i1.p1	100	89	NA	NA	NA	NA	NA	NA	GG_celegans
TRINITY_GG_19942_c0_g1_i2.p1	100	68	NA	NA	NA	NA	NA	NA	GG_celegans
TRINITY_GG_4725_c0_g1_i1.p1	100	72	NA	NA	NA	NA	NA	NA	GG_celegans
TRINITY_GG_16546_c0_g1_i1.p2	100	72	NA	NA	NA	NA	NA	NA	GG_celegans
TRINITY_GG_15180_c0_g1_i1.p1	100	74	NA	NA	NA	NA	NA	NA	GG_celegans
TRINITY_GG_9319_c0_g1_i1.p2	100	62	NA	NA	NA	NA	NA	NA	GG_celegans
TRINITY_GG_2483_c0_g1_i1.p1	100	86	NA	NA	NA	NA	NA	NA	GG_celegans
TRINITY_GG_16311_c0_g1_i1.p1	100	83	NA	NA	NA	NA	NA	NA	GG_celegans
TRINITY_GG_21845_c3_g1_i1.p1	100	86	NA	NA	NA	NA	NA	NA	GG_celegans
TRINITY_GG_4299_c0_g1_i1.p1	100	89	NA	NA	NA	NA	NA	NA	GG_celegans
TRINITY_GG_6399_c1_g1_i1.p1	100	72	NA	NA	NA	NA	NA	NA	GG_celegans
TRINITY_GG_19906_c0_g1_i1.p1	100	93	NA	NA	NA	NA	NA	NA	GG_celegans
TRINITY_GG_19893_c0_g1_i1.p1	100	83	NA	NA	NA	NA	NA	NA	GG_celegans
TRINITY_GG_3788_c0_g1_i1.p1	100	74	NA	NA	NA	NA	NA	NA	GG_celegans
TRINITY_GG_2734_c0_g1_i1.p1	100	93	NA	NA	NA	NA	NA	NA	GG_celegans
TRINITY_GG_15746_c0_g1_i1.p5	100	51	NA	NA	NA	NA	NA	NA	GG_celegans
TRINITY_GG_3201_c0_g1_i1.p2	100	75	NA	NA	NA	NA	NA	NA	GG_celegans
TRINITY_GG_7548_c3_g1_i1.p1	100	78	NA	NA	NA	NA	NA	NA	GG_celegans
TRINITY_GG_22214_c0_g1_i1.p2	100	61	NA	NA	NA	NA	NA	NA	GG_celegans
TRINITY_GG_13896_c0_g1_i1.p2	100	58	NA	NA	NA	NA	NA	NA	GG_celegans
TRINITY_GG_15786_c0_g1_i1.p1	100	86	NA	NA	NA	NA	NA	NA	GG_celegans
TRINITY_GG_10852_c1_g1_i1.p1	100	99	NA	NA	NA	NA	NA	NA	GG_celegans
TRINITY_GG_1324_c0_g1_i1.p2	100	62	NA	NA	NA	NA	NA	NA	GG_celegans
TRINITY_GG_21697_c0_g1_i1.p2	100	85	NA	NA	NA	NA	NA	NA	GG_celegans
TRINITY_GG_7495_c1_g1_i1.p1	100	92	NA	NA	NA	NA	NA	NA	GG_celegans
TRINITY_GG_18372_c0_g1_i1.p1	100	74	NA	NA	NA	NA	NA	NA	GG_celegans
TRINITY_GG_6816_c0_g1_i1.p1	100	74	NA	NA	NA	NA	NA	NA	GG_celegans
TRINITY_GG_18738_c0_g1_i1.p1	100	42	NA	NA	NA	NA	NA	NA	GG_celegans
TRINITY_GG_18593_c0_g1_i1.p1	100	84	NA	NA	NA	NA	NA	NA	GG_celegans
TRINITY_GG_10971_c0_g1_i2.p1	100	73	NA	NA	NA	NA	NA	NA	GG_celegans
TRINITY_GG_21993_c0_g1_i1.p1	100	84	NA	NA	NA	NA	NA	NA	GG_celegans
TRINITY_GG_9596_c0_g1_i1.p1	100	88	NA	NA	NA	NA	NA	NA	GG_celegans
TRINITY_GG_21132_c0_g1_i1.p1	100	76	NA	NA	NA	NA	NA	NA	GG_celegans
TRINITY_GG_10854_c0_g1_i1.p1	100	79	NA	NA	NA	NA	NA	NA	GG_celegans
TRINITY_GG_16158_c0_g1_i1.p1	100	91	NA	NA	NA	NA	NA	NA	GG_celegans
TRINITY_GG_4229_c0_g1_i1.p1	100	71	NA	NA	NA	NA	NA	NA	GG_celegans
TRINITY_GG_14116_c0_g1_i1.p2	100	80	NA	NA	NA	NA	NA	NA	GG_celegans
TRINITY_GG_5831_c0_g1_i2.p1	100	98	NA	NA	NA	NA	NA	NA	GG_celegans
TRINITY_GG_5842_c0_g1_i1.p1	100	56	NA	NA	NA	NA	NA	NA	GG_celegans
TRINITY_GG_16030_c0_g1_i1.p3	100	54	NA	NA	NA	NA	NA	NA	GG_celegans
TRINITY_GG_21840_c1_g1_i1.p1	100	82	NA	NA	NA	NA	NA	NA	GG_celegans
TRINITY_GG_21850_c0_g1_i1.p1	100	99	NA	NA	NA	NA	NA	NA	GG_celegans
TRINITY_GG_6684_c0_g1_i1.p1	100	87	NA	NA	NA	NA	NA	NA	GG_celegans
TRINITY_GG_2336_c0_g1_i2.p13	100	26	NA	NA	NA	NA	NA	NA	GG_celegans
TRINITY_GG_18662_c0_g1_i1.p2	100	63	NA	NA	NA	NA	NA	NA	GG_celegans
TRINITY_GG_7133_c0_g1_i1.p1	100	78	NA	NA	NA	NA	NA	NA	GG_celegans
TRINITY_GG_14807_c0_g1_i1.p1	100	88	NA	NA	NA	NA	NA	NA	GG_celegans
TRINITY_GG_16902_c0_g1_i1.p1	100	95	NA	NA	NA	NA	NA	NA	GG_celegans
TRINITY_GG_18140_c0_g1_i1.p1	100	95	NA	NA	NA	NA	NA	NA	GG_celegans
TRINITY_GG_861_c0_g1_i1.p1	100	73	NA	NA	NA	NA	NA	NA	GG_celegans
TRINITY_GG_12292_c0_g1_i1.p2	100	67	NA	NA	NA	NA	NA	NA	GG_celegans
TRINITY_GG_5521_c0_g1_i1.p1	100	82	NA	NA	NA	NA	NA	NA	GG_celegans
TRINITY_GG_4215_c0_g1_i1.p1	100	94	NA	NA	NA	NA	NA	NA	GG_celegans
TRINITY_GG_16052_c2_g1_i1.p1	100	75	NA	NA	NA	NA	NA	NA	GG_celegans
TRINITY_GG_6947_c0_g1_i1.p1	100	89	NA	NA	NA	NA	NA	NA	GG_celegans
TRINITY_GG_1966_c0_g1_i2.p1	100	93	NA	NA	NA	NA	NA	NA	GG_celegans
TRINITY_GG_1966_c0_g1_i1.p1	100	87	NA	NA	NA	NA	NA	NA	GG_celegans
TRINITY_GG_1985_c0_g1_i2.p2	100	71	NA	NA	NA	NA	NA	NA	GG_celegans
TRINITY_GG_1985_c0_g1_i1.p1	100	96	NA	NA	NA	NA	NA	NA	GG_celegans
TRINITY_GG_17547_c0_g1_i1.p1	100	53	NA	NA	NA	NA	NA	NA	GG_celegans
TRINITY_GG_4109_c0_g1_i1.p1	100	66	NA	NA	NA	NA	NA	NA	GG_celegans
TRINITY_GG_15947_c0_g1_i1.p1	100	54	NA	NA	NA	NA	NA	NA	GG_celegans
TRINITY_GG_5708_c0_g1_i1.p1	100	72	NA	NA	NA	NA	NA	NA	GG_celegans
TRINITY_GG_4875_c0_g1_i1.p1	100	90	NA	NA	NA	NA	NA	NA	GG_celegans
TRINITY_GG_13778_c0_g1_i1.p1	100	79	NA	NA	NA	NA	NA	NA	GG_celegans
TRINITY_GG_2384_c0_g1_i1.p1	100	72	NA	NA	NA	NA	NA	NA	GG_celegans
TRINITY_GG_19815_c0_g1_i1.p1	100	86	NA	NA	NA	NA	NA	NA	GG_celegans
TRINITY_GG_20281_c0_g1_i1.p2	100	91	NA	NA	NA	NA	NA	NA	GG_celegans
TRINITY_GG_5238_c0_g1_i1.p1	100	89	NA	NA	NA	NA	NA	NA	GG_celegans
TRINITY_GG_17392_c0_g1_i1.p1	100	85	NA	NA	NA	NA	NA	NA	GG_celegans
TRINITY_GG_12398_c0_g1_i1.p2	100	57	NA	NA	NA	NA	NA	NA	GG_celegans
TRINITY_GG_2040_c0_g1_i1.p1	100	66	NA	NA	NA	NA	NA	NA	GG_celegans
TRINITY_GG_14567_c0_g1_i1.p1	100	71	NA	NA	NA	NA	NA	NA	GG_celegans
TRINITY_GG_21466_c2_g1_i1.p1	100	96	NA	NA	NA	NA	NA	NA	GG_celegans
TRINITY_GG_3463_c0_g1_i2.p2	100	88	NA	NA	NA	NA	NA	NA	GG_celegans
TRINITY_GG_5334_c0_g1_i1.p1	100	67	NA	NA	NA	NA	NA	NA	GG_celegans
TRINITY_GG_18417_c0_g1_i1.p1	100	79	NA	NA	NA	NA	NA	NA	GG_celegans
TRINITY_GG_18399_c0_g1_i1.p1	100	58	NA	NA	NA	NA	NA	NA	GG_celegans
TRINITY_GG_16579_c0_g1_i1.p1	100	89	NA	NA	NA	NA	NA	NA	GG_celegans
TRINITY_GG_18897_c0_g1_i1.p1	100	73	NA	NA	NA	NA	NA	NA	GG_celegans
TRINITY_GG_6972_c0_g1_i1.p1	100	85	NA	NA	NA	NA	NA	NA	GG_celegans
TRINITY_GG_16119_c0_g1_i2.p1	100	99	NA	NA	NA	NA	NA	NA	GG_celegans
TRINITY_GG_6922_c0_g1_i1.p1	100	88	NA	NA	NA	NA	NA	NA	GG_celegans
TRINITY_GG_18477_c0_g1_i1.p2	100	46	NA	NA	NA	NA	NA	NA	GG_celegans
TRINITY_GG_1799_c0_g1_i1.p1	100	92	NA	NA	NA	NA	NA	NA	GG_celegans
TRINITY_GG_3918_c0_g1_i1.p1	100	67	NA	NA	NA	NA	NA	NA	GG_celegans
TRINITY_GG_3950_c0_g1_i1.p1	100	72	NA	NA	NA	NA	NA	NA	GG_celegans
TRINITY_GG_15591_c0_g1_i1.p2	100	69	NA	NA	NA	NA	NA	NA	GG_celegans
TRINITY_GG_6735_c0_g1_i1.p2	100	91	NA	NA	NA	NA	NA	NA	GG_celegans
TRINITY_GG_6724_c0_g1_i2.p3	100	76	NA	NA	NA	NA	NA	NA	GG_celegans
TRINITY_GG_6736_c1_g1_i1.p1	100	85	NA	NA	NA	NA	NA	NA	GG_celegans
TRINITY_GG_6378_c0_g1_i2.p1	100	90	NA	NA	NA	NA	NA	NA	GG_celegans
TRINITY_GG_6405_c0_g1_i1.p1	100	91	NA	NA	NA	NA	NA	NA	GG_celegans
TRINITY_GG_5835_c0_g2_i1.p1	100	89	NA	NA	NA	NA	NA	NA	GG_celegans
TRINITY_GG_4865_c1_g1_i1.p5	100	41	NA	NA	NA	NA	NA	NA	GG_celegans
TRINITY_GG_4849_c0_g1_i1.p1	100	46	NA	NA	NA	NA	NA	NA	GG_celegans
TRINITY_GG_4982_c1_g1_i1.p1	100	90	NA	NA	NA	NA	NA	NA	GG_celegans
TRINITY_GG_5434_c0_g1_i3.p2	100	44	NA	NA	NA	NA	NA	NA	GG_celegans
TRINITY_GG_197_c0_g1_i1.p2	100	25	NA	NA	NA	NA	NA	NA	GG_celegans
TRINITY_GG_6794_c0_g1_i1.p1	100	90	NA	NA	NA	NA	NA	NA	GG_celegans
TRINITY_GG_13445_c0_g1_i1.p1	100	98	NA	NA	NA	NA	NA	NA	GG_celegans
TRINITY_GG_16738_c1_g1_i1.p2	100	56	NA	NA	NA	NA	NA	NA	GG_celegans
TRINITY_GG_4482_c0_g1_i1.p1	100	85	NA	NA	NA	NA	NA	NA	GG_celegans
TRINITY_GG_17070_c0_g1_i1.p2	100	79	NA	NA	NA	NA	NA	NA	GG_celegans
TRINITY_GG_5023_c0_g1_i1.p3	100	62	NA	NA	NA	NA	NA	NA	GG_celegans
TRINITY_GG_14849_c0_g1_i1.p1	100	62	NA	NA	NA	NA	NA	NA	GG_celegans
TRINITY_GG_21348_c0_g1_i1.p1	100	75	NA	NA	NA	NA	NA	NA	GG_celegans
TRINITY_GG_16077_c0_g1_i1.p1	100	90	NA	NA	NA	NA	NA	NA	GG_celegans
TRINITY_GG_16065_c0_g1_i1.p1	100	59	NA	NA	NA	NA	NA	NA	GG_celegans
TRINITY_GG_9202_c1_g1_i1.p1	100	85	NA	NA	NA	NA	NA	NA	GG_celegans
TRINITY_GG_19699_c2_g1_i1.p1	100	96	NA	NA	NA	NA	NA	NA	GG_celegans
TRINITY_GG_18800_c0_g1_i1.p3	100	75	NA	NA	NA	NA	NA	NA	GG_celegans
TRINITY_GG_7227_c0_g1_i1.p3	100	72	NA	NA	NA	NA	NA	NA	GG_celegans
TRINITY_GG_10387_c0_g1_i1.p3	100	61	NA	NA	NA	NA	NA	NA	GG_celegans
TRINITY_GG_22094_c0_g1_i1.p1	100	62	NA	NA	NA	NA	NA	NA	GG_celegans
TRINITY_GG_2946_c0_g1_i1.p1	100	66	NA	NA	NA	NA	NA	NA	GG_celegans
TRINITY_GG_20521_c0_g1_i1.p2	100	71	NA	NA	NA	NA	NA	NA	GG_celegans
TRINITY_GG_9535_c0_g1_i1.p2	100	85	NA	NA	NA	NA	NA	NA	GG_celegans
TRINITY_GG_4826_c0_g1_i1.p2	100	75	NA	NA	NA	NA	NA	NA	GG_celegans
TRINITY_GG_18603_c0_g1_i2.p1	100	84	NA	NA	NA	NA	NA	NA	GG_celegans
TRINITY_GG_6353_c0_g1_i1.p1	100	78	NA	NA	NA	NA	NA	NA	GG_celegans
TRINITY_GG_1365_c0_g1_i1.p1	100	95	NA	NA	NA	NA	NA	NA	GG_celegans
TRINITY_GG_9979_c0_g1_i1.p1	100	84	NA	NA	NA	NA	NA	NA	GG_celegans
TRINITY_GG_3230_c0_g1_i1.p1	100	95	NA	NA	NA	NA	NA	NA	GG_celegans
TRINITY_GG_3350_c1_g1_i1.p2	100	90	NA	NA	NA	NA	NA	NA	GG_celegans
TRINITY_GG_21944_c0_g1_i1.p1	100	95	NA	NA	NA	NA	NA	NA	GG_celegans
TRINITY_GG_646_c0_g1_i1.p2	100	58	NA	NA	NA	NA	NA	NA	GG_celegans
TRINITY_GG_11680_c0_g1_i1.p1	100	96	NA	NA	NA	NA	NA	NA	GG_celegans
TRINITY_GG_17758_c1_g1_i1.p3	100	54	NA	NA	NA	NA	NA	NA	GG_celegans
TRINITY_GG_17947_c0_g1_i2.p3	100	67	NA	NA	NA	NA	NA	NA	GG_celegans
TRINITY_GG_7579_c0_g1_i1.p1	100	99	NA	NA	NA	NA	NA	NA	GG_celegans
TRINITY_GG_12191_c0_g1_i1.p2	100	99	NA	NA	NA	NA	NA	NA	GG_celegans
TRINITY_GG_11347_c0_g1_i1.p3	100	62	NA	NA	NA	NA	NA	NA	GG_celegans
TRINITY_GG_23206_c0_g1_i1.p1	100	85	NA	NA	NA	NA	NA	NA	GG_celegans
TRINITY_GG_848_c0_g1_i1.p1	100	70	NA	NA	NA	NA	NA	NA	GG_celegans
TRINITY_GG_8238_c0_g1_i1.p2	100	53	NA	NA	NA	NA	NA	NA	GG_celegans
TRINITY_GG_430_c0_g1_i1.p1	100	80	NA	NA	NA	NA	NA	NA	GG_celegans
TRINITY_GG_3689_c0_g1_i1.p1	100	43	NA	NA	NA	NA	NA	NA	GG_celegans
TRINITY_GG_3671_c1_g1_i1.p2	100	79	NA	NA	NA	NA	NA	NA	GG_celegans
TRINITY_GG_10146_c0_g1_i1.p1	100	96	NA	NA	NA	NA	NA	NA	GG_celegans
TRINITY_GG_10173_c0_g1_i1.p1	100	64	NA	NA	NA	NA	NA	NA	GG_celegans
TRINITY_GG_3484_c0_g1_i1.p1	100	83	NA	NA	NA	NA	NA	NA	GG_celegans
TRINITY_GG_3970_c0_g1_i1.p1	100	89	NA	NA	NA	NA	NA	NA	GG_celegans
TRINITY_GG_3981_c0_g1_i1.p3	100	68	NA	NA	NA	NA	NA	NA	GG_celegans
TRINITY_GG_18287_c0_g1_i1.p1	100	78	NA	NA	NA	NA	NA	NA	GG_celegans
TRINITY_GG_9244_c0_g1_i1.p2	100	88	NA	NA	NA	NA	NA	NA	GG_celegans
TRINITY_GG_2636_c0_g1_i1.p1	100	82	NA	NA	NA	NA	NA	NA	GG_celegans
TRINITY_GG_2651_c0_g1_i1.p1	100	82	NA	NA	NA	NA	NA	NA	GG_celegans
TRINITY_GG_14328_c0_g1_i1.p1	100	82	NA	NA	NA	NA	NA	NA	GG_celegans
TRINITY_GG_14352_c0_g1_i1.p1	100	82	NA	NA	NA	NA	NA	NA	GG_celegans
TRINITY_GG_4497_c0_g1_i1.p1	100	80	NA	NA	NA	NA	NA	NA	GG_celegans
TRINITY_GG_16651_c0_g1_i1.p3	100	91	NA	NA	NA	NA	NA	NA	GG_celegans
TRINITY_GG_10558_c0_g1_i1.p1	100	93	NA	NA	NA	NA	NA	NA	GG_celegans
TRINITY_GG_7343_c0_g1_i2.p1	100	92	NA	NA	NA	NA	NA	NA	GG_celegans
TRINITY_GG_9068_c0_g1_i1.p1	100	91	NA	NA	NA	NA	NA	NA	GG_celegans
TRINITY_GG_7353_c0_g1_i1.p1	100	94	NA	NA	NA	NA	NA	NA	GG_celegans
TRINITY_GG_18954_c0_g1_i1.p1	100	80	NA	NA	NA	NA	NA	NA	GG_celegans
TRINITY_GG_4752_c0_g1_i1.p1	100	72	NA	NA	NA	NA	NA	NA	GG_celegans
TRINITY_GG_1022_c0_g1_i1.p3	100	74	NA	NA	NA	NA	NA	NA	GG_celegans
TRINITY_GG_11974_c0_g1_i1.p1	100	81	NA	NA	NA	NA	NA	NA	GG_celegans
TRINITY_GG_14045_c0_g1_i1.p1	100	71	NA	NA	NA	NA	NA	NA	GG_celegans
TRINITY_GG_8492_c0_g1_i1.p1	100	70	NA	NA	NA	NA	NA	NA	GG_celegans
TRINITY_GG_12801_c0_g1_i1.p2	100	96	NA	NA	NA	NA	NA	NA	GG_celegans
TRINITY_GG_1846_c0_g1_i1.p1	100	90	NA	NA	NA	NA	NA	NA	GG_celegans
TRINITY_GG_13553_c0_g1_i1.p1	100	63	NA	NA	NA	NA	NA	NA	GG_celegans
TRINITY_GG_1844_c0_g1_i1.p1	100	87	NA	NA	NA	NA	NA	NA	GG_celegans
TRINITY_GG_7634_c0_g1_i3.p1	100	67	NA	NA	NA	NA	NA	NA	GG_celegans
TRINITY_GG_5434_c1_g1_i1.p1	100	64	NA	NA	NA	NA	NA	NA	GG_celegans
TRINITY_GG_4264_c0_g1_i1.p1	100	92	NA	NA	NA	NA	NA	NA	GG_celegans
TRINITY_GG_14737_c0_g1_i1.p1	100	99	NA	NA	NA	NA	NA	NA	GG_celegans
TRINITY_GG_12636_c4_g1_i1.p1	100	90	NA	NA	NA	NA	NA	NA	GG_celegans
TRINITY_GG_1239_c2_g1_i1.p2	100	94	NA	NA	NA	NA	NA	NA	GG_celegans
TRINITY_GG_11192_c0_g1_i1.p2	100	57	NA	NA	NA	NA	NA	NA	GG_celegans
TRINITY_GG_22059_c0_g1_i1.p1	100	77	NA	NA	NA	NA	NA	NA	GG_celegans
TRINITY_GG_11192_c0_g1_i1.p1	100	81	NA	NA	NA	NA	NA	NA	GG_celegans
TRINITY_GG_16756_c0_g1_i1.p1	100	51	NA	NA	NA	NA	NA	NA	GG_celegans
TRINITY_GG_7738_c0_g1_i1.p5	100	83	NA	NA	NA	NA	NA	NA	GG_celegans
TRINITY_GG_17140_c0_g1_i1.p2	100	67	NA	NA	NA	NA	NA	NA	GG_celegans
TRINITY_GG_4456_c0_g1_i1.p1	100	59	NA	NA	NA	NA	NA	NA	GG_celegans
TRINITY_GG_4648_c0_g1_i1.p1	100	89	NA	NA	NA	NA	NA	NA	GG_celegans
TRINITY_GG_21884_c0_g1_i1.p1	100	70	NA	NA	NA	NA	NA	NA	GG_celegans
TRINITY_GG_15807_c0_g1_i1.p1	100	90	NA	NA	NA	NA	NA	NA	GG_celegans
TRINITY_GG_16090_c0_g1_i2.p1	100	76	NA	NA	NA	NA	NA	NA	GG_celegans
TRINITY_GG_16090_c0_g1_i1.p1	100	96	NA	NA	NA	NA	NA	NA	GG_celegans
TRINITY_GG_15195_c0_g1_i1.p2	100	64	NA	NA	NA	NA	NA	NA	GG_celegans
TRINITY_GG_15195_c0_g1_i1.p1	100	95	NA	NA	NA	NA	NA	NA	GG_celegans
TRINITY_GG_15200_c0_g1_i1.p2	100	86	NA	NA	NA	NA	NA	NA	GG_celegans
TRINITY_GG_22740_c0_g1_i1.p1	100	92	NA	NA	NA	NA	NA	NA	GG_celegans
TRINITY_GG_22746_c0_g1_i1.p1	100	67	NA	NA	NA	NA	NA	NA	GG_celegans
TRINITY_GG_4898_c0_g1_i1.p1	100	77	NA	NA	NA	NA	NA	NA	GG_celegans
TRINITY_GG_4913_c0_g1_i1.p1	100	83	NA	NA	NA	NA	NA	NA	GG_celegans
TRINITY_GG_15904_c0_g1_i1.p2	100	86	NA	NA	NA	NA	NA	NA	GG_celegans
TRINITY_GG_15907_c0_g1_i1.p3	100	85	NA	NA	NA	NA	NA	NA	GG_celegans
TRINITY_GG_15897_c0_g1_i1.p1	100	87	NA	NA	NA	NA	NA	NA	GG_celegans
TRINITY_GG_22108_c0_g1_i1.p2	100	52	NA	NA	NA	NA	NA	NA	GG_celegans
TRINITY_GG_22115_c0_g1_i1.p1	100	57	NA	NA	NA	NA	NA	NA	GG_celegans
TRINITY_GG_22100_c0_g1_i1.p1	100	75	NA	NA	NA	NA	NA	NA	GG_celegans
TRINITY_GG_7511_c0_g1_i1.p1	100	80	NA	NA	NA	NA	NA	NA	GG_celegans
TRINITY_GG_6003_c0_g1_i1.p2	100	94	NA	NA	NA	NA	NA	NA	GG_celegans
TRINITY_GG_5970_c0_g1_i1.p1	100	99	NA	NA	NA	NA	NA	NA	GG_celegans
TRINITY_GG_7051_c0_g1_i1.p1	100	88	NA	NA	NA	NA	NA	NA	GG_celegans
TRINITY_GG_13462_c0_g1_i3.p5	100	90	NA	NA	NA	NA	NA	NA	GG_celegans
TRINITY_GG_6365_c0_g1_i1.p2	100	67	NA	NA	NA	NA	NA	NA	GG_celegans
TRINITY_GG_5011_c0_g1_i1.p1	100	99	NA	NA	NA	NA	NA	NA	GG_celegans
TRINITY_GG_12600_c0_g1_i1.p1	100	87	NA	NA	NA	NA	NA	NA	GG_celegans
TRINITY_GG_13108_c0_g1_i1.p1	100	81	NA	NA	NA	NA	NA	NA	GG_celegans
TRINITY_GG_8964_c0_g1_i1.p1	100	67	NA	NA	NA	NA	NA	NA	GG_celegans
TRINITY_GG_11050_c3_g1_i1.p2	100	57	NA	NA	NA	NA	NA	NA	GG_celegans
TRINITY_GG_3177_c0_g1_i4.p12	100	48	NA	NA	NA	NA	NA	NA	GG_celegans
TRINITY_GG_2605_c0_g1_i1.p1	100	69	NA	NA	NA	NA	NA	NA	GG_celegans
TRINITY_GG_2584_c0_g1_i1.p1	100	90	NA	NA	NA	NA	NA	NA	GG_celegans
TRINITY_GG_15684_c0_g1_i1.p1	100	88	NA	NA	NA	NA	NA	NA	GG_celegans
TRINITY_GG_2594_c0_g1_i1.p1	100	62	NA	NA	NA	NA	NA	NA	GG_celegans
TRINITY_GG_15691_c0_g1_i1.p1	100	66	NA	NA	NA	NA	NA	NA	GG_celegans
TRINITY_GG_2573_c0_g1_i1.p3	100	63	NA	NA	NA	NA	NA	NA	GG_celegans
TRINITY_GG_18589_c0_g1_i1.p1	100	83	NA	NA	NA	NA	NA	NA	GG_celegans
TRINITY_GG_18127_c0_g1_i1.p1	100	57	NA	NA	NA	NA	NA	NA	GG_celegans
TRINITY_GG_18110_c0_g1_i1.p1	100	96	NA	NA	NA	NA	NA	NA	GG_celegans
TRINITY_GG_180_c0_g1_i1.p1	100	88	NA	NA	NA	NA	NA	NA	GG_celegans
TRINITY_GG_17943_c0_g1_i1.p1	100	89	NA	NA	NA	NA	NA	NA	GG_celegans
TRINITY_GG_12075_c0_g1_i1.p2	100	95	NA	NA	NA	NA	NA	NA	GG_celegans
TRINITY_GG_7487_c0_g1_i1.p1	100	70	NA	NA	NA	NA	NA	NA	GG_celegans
TRINITY_GG_6429_c0_g1_i1.p1	100	76	NA	NA	NA	NA	NA	NA	GG_celegans
TRINITY_GG_6457_c0_g1_i1.p2	100	69	NA	NA	NA	NA	NA	NA	GG_celegans
TRINITY_GG_12916_c0_g1_i1.p2	100	96	NA	NA	NA	NA	NA	NA	GG_celegans
TRINITY_GG_17057_c0_g1_i1.p1	100	49	NA	NA	NA	NA	NA	NA	GG_celegans
TRINITY_GG_11205_c0_g1_i1.p1	100	56	NA	NA	NA	NA	NA	NA	GG_celegans
TRINITY_GG_12325_c0_g1_i1.p2	100	79	NA	NA	NA	NA	NA	NA	GG_celegans
TRINITY_GG_5463_c0_g1_i1.p5	100	65	NA	NA	NA	NA	NA	NA	GG_celegans
TRINITY_GG_2715_c0_g1_i1.p1	100	84	NA	NA	NA	NA	NA	NA	GG_celegans
TRINITY_GG_4599_c0_g1_i1.p1	100	72	NA	NA	NA	NA	NA	NA	GG_celegans
TRINITY_GG_1652_c0_g1_i1.p1	100	75	NA	NA	NA	NA	NA	NA	GG_celegans
TRINITY_GG_22076_c0_g1_i1.p1	100	70	NA	NA	NA	NA	NA	NA	GG_celegans
TRINITY_GG_13146_c0_g1_i1.p1	100	73	NA	NA	NA	NA	NA	NA	GG_celegans
TRINITY_GG_16025_c0_g1_i1.p3	100	49	NA	NA	NA	NA	NA	NA	GG_celegans
TRINITY_GG_15970_c0_g1_i1.p4	100	59	NA	NA	NA	NA	NA	NA	GG_celegans
TRINITY_GG_16345_c0_g1_i1.p1	100	62	NA	NA	NA	NA	NA	NA	GG_celegans
TRINITY_GG_7100_c0_g1_i1.p4	100	27	NA	NA	NA	NA	NA	NA	GG_celegans
TRINITY_GG_7075_c0_g1_i1.p1	100	94	NA	NA	NA	NA	NA	NA	GG_celegans
TRINITY_GG_16347_c0_g1_i1.p1	100	87	NA	NA	NA	NA	NA	NA	GG_celegans
TRINITY_GG_6188_c0_g1_i1.p1	100	87	NA	NA	NA	NA	NA	NA	GG_celegans
TRINITY_GG_8510_c0_g1_i1.p1	100	88	NA	NA	NA	NA	NA	NA	GG_celegans
TRINITY_GG_8403_c0_g1_i1.p1	100	96	NA	NA	NA	NA	NA	NA	GG_celegans
TRINITY_GG_13415_c0_g1_i1.p1	100	78	NA	NA	NA	NA	NA	NA	GG_celegans
TRINITY_GG_19061_c0_g1_i1.p1	100	76	NA	NA	NA	NA	NA	NA	GG_celegans
TRINITY_GG_19061_c0_g1_i1.p3	100	55	NA	NA	NA	NA	NA	NA	GG_celegans
TRINITY_GG_14293_c0_g1_i1.p1	100	68	NA	NA	NA	NA	NA	NA	GG_celegans
TRINITY_GG_22708_c0_g1_i2.p1	100	79	NA	NA	NA	NA	NA	NA	GG_celegans
TRINITY_GG_22708_c0_g1_i1.p1	100	65	NA	NA	NA	NA	NA	NA	GG_celegans
TRINITY_GG_7178_c0_g1_i2.p1	100	85	NA	NA	NA	NA	NA	NA	GG_celegans
TRINITY_GG_18073_c0_g1_i1.p1	100	76	NA	NA	NA	NA	NA	NA	GG_celegans
TRINITY_GG_2904_c1_g1_i1.p1	100	67	NA	NA	NA	NA	NA	NA	GG_celegans
TRINITY_GG_2904_c2_g1_i1.p1	100	73	NA	NA	NA	NA	NA	NA	GG_celegans
TRINITY_GG_2923_c0_g1_i1.p2	100	70	NA	NA	NA	NA	NA	NA	GG_celegans
TRINITY_GG_14834_c0_g1_i1.p1	100	94	NA	NA	NA	NA	NA	NA	GG_celegans
TRINITY_GG_15742_c0_g1_i1.p1	100	65	NA	NA	NA	NA	NA	NA	GG_celegans
TRINITY_GG_2795_c0_g1_i2.p1	100	88	NA	NA	NA	NA	NA	NA	GG_celegans
TRINITY_GG_3892_c0_g1_i1.p1	100	86	NA	NA	NA	NA	NA	NA	GG_celegans
TRINITY_GG_3909_c0_g1_i1.p2	100	34	NA	NA	NA	NA	NA	NA	GG_celegans
TRINITY_GG_3907_c0_g1_i1.p1	100	86	NA	NA	NA	NA	NA	NA	GG_celegans
TRINITY_GG_3907_c0_g1_i3.p1	100	86	NA	NA	NA	NA	NA	NA	GG_celegans
TRINITY_GG_19311_c0_g1_i1.p1	100	55	NA	NA	NA	NA	NA	NA	GG_celegans
TRINITY_GG_2563_c0_g1_i1.p2	100	80	NA	NA	NA	NA	NA	NA	GG_celegans
TRINITY_GG_15559_c0_g1_i1.p1	100	83	NA	NA	NA	NA	NA	NA	GG_celegans
TRINITY_GG_3412_c0_g1_i1.p1	100	93	NA	NA	NA	NA	NA	NA	GG_celegans
TRINITY_GG_4630_c0_g1_i1.p1	100	99	NA	NA	NA	NA	NA	NA	GG_celegans
TRINITY_GG_18607_c0_g1_i1.p1	100	74	NA	NA	NA	NA	NA	NA	GG_celegans
TRINITY_GG_5583_c0_g1_i1.p1	100	76	NA	NA	NA	NA	NA	NA	GG_celegans
TRINITY_GG_17220_c2_g1_i1.p1	100	88	NA	NA	NA	NA	NA	NA	GG_celegans
TRINITY_GG_16215_c0_g1_i1.p1	100	88	NA	NA	NA	NA	NA	NA	GG_celegans
TRINITY_GG_16238_c0_g1_i1.p1	100	95	NA	NA	NA	NA	NA	NA	GG_celegans
TRINITY_GG_6900_c0_g1_i1.p1	100	95	NA	NA	NA	NA	NA	NA	GG_celegans
TRINITY_GG_8396_c0_g1_i1.p1	100	81	NA	NA	NA	NA	NA	NA	GG_celegans
TRINITY_GG_8365_c0_g1_i1.p3	100	84	NA	NA	NA	NA	NA	NA	GG_celegans
TRINITY_GG_1279_c0_g1_i1.p1	100	61	NA	NA	NA	NA	NA	NA	GG_celegans
TRINITY_GG_17799_c0_g1_i1.p3	100	75	NA	NA	NA	NA	NA	NA	GG_celegans
TRINITY_GG_20601_c0_g1_i1.p1	100	77	NA	NA	NA	NA	NA	NA	GG_celegans
TRINITY_GG_6312_c0_g1_i1.p1	100	69	NA	NA	NA	NA	NA	NA	GG_celegans
TRINITY_GG_10720_c0_g1_i1.p1	100	91	NA	NA	NA	NA	NA	NA	GG_celegans
TRINITY_GG_20885_c0_g1_i1.p1	100	97	NA	NA	NA	NA	NA	NA	GG_celegans
TRINITY_GG_10439_c4_g1_i1.p3	100	80	NA	NA	NA	NA	NA	NA	GG_celegans
TRINITY_GG_16686_c0_g1_i1.p1	100	84	NA	NA	NA	NA	NA	NA	GG_celegans
TRINITY_GG_6764_c0_g1_i1.p1	100	90	NA	NA	NA	NA	NA	NA	GG_celegans
TRINITY_GG_15730_c0_g1_i1.p3	100	59	NA	NA	NA	NA	NA	NA	GG_celegans
TRINITY_GG_15233_c0_g1_i1.p1	100	91	NA	NA	NA	NA	NA	NA	GG_celegans
TRINITY_GG_6340_c0_g1_i2.p2	100	36	NA	NA	NA	NA	NA	NA	GG_celegans
TRINITY_GG_8511_c0_g1_i1.p1	100	76	NA	NA	NA	NA	NA	NA	GG_celegans
TRINITY_GG_8541_c0_g1_i1.p1	100	83	NA	NA	NA	NA	NA	NA	GG_celegans
TRINITY_GG_8507_c0_g1_i1.p1	100	76	NA	NA	NA	NA	NA	NA	GG_celegans
TRINITY_GG_21464_c0_g1_i1.p1	100	80	NA	NA	NA	NA	NA	NA	GG_celegans
TRINITY_GG_13197_c1_g1_i1.p1	100	97	NA	NA	NA	NA	NA	NA	GG_celegans
TRINITY_GG_14955_c0_g1_i1.p1	100	90	NA	NA	NA	NA	NA	NA	GG_celegans
TRINITY_GG_4753_c0_g1_i1.p1	100	89	NA	NA	NA	NA	NA	NA	GG_celegans
TRINITY_GG_17871_c0_g1_i1.p1	100	98	NA	NA	NA	NA	NA	NA	GG_celegans
TRINITY_GG_4467_c0_g1_i1.p1	100	87	NA	NA	NA	NA	NA	NA	GG_celegans
TRINITY_GG_17187_c0_g1_i1.p1	100	87	NA	NA	NA	NA	NA	NA	GG_celegans
TRINITY_GG_4419_c0_g1_i1.p2	100	81	NA	NA	NA	NA	NA	NA	GG_celegans
TRINITY_GG_10021_c0_g1_i2.p1	100	84	NA	NA	NA	NA	NA	NA	GG_celegans
TRINITY_GG_1533_c0_g1_i1.p2	100	99	NA	NA	NA	NA	NA	NA	GG_celegans
TRINITY_GG_1522_c0_g1_i1.p1	100	90	NA	NA	NA	NA	NA	NA	GG_celegans
TRINITY_GG_4594_c0_g1_i1.p1	100	90	NA	NA	NA	NA	NA	NA	GG_celegans
TRINITY_GG_16399_c0_g1_i1.p1	100	97	NA	NA	NA	NA	NA	NA	GG_celegans
TRINITY_GG_3324_c1_g1_i1.p2	100	47	NA	NA	NA	NA	NA	NA	GG_celegans
TRINITY_GG_10040_c0_g1_i1.p2	100	83	NA	NA	NA	NA	NA	NA	GG_celegans
TRINITY_GG_21670_c0_g1_i1.p2	100	85	NA	NA	NA	NA	NA	NA	GG_celegans
TRINITY_GG_6050_c1_g1_i1.p3	100	51	NA	NA	NA	NA	NA	NA	GG_celegans
TRINITY_GG_18298_c0_g1_i1.p2	100	72	NA	NA	NA	NA	NA	NA	GG_celegans
TRINITY_GG_6058_c0_g1_i1.p3	100	66	NA	NA	NA	NA	NA	NA	GG_celegans
TRINITY_GG_14472_c0_g1_i1.p1	100	54	NA	NA	NA	NA	NA	NA	GG_celegans
TRINITY_GG_6848_c0_g1_i1.p2	100	91	NA	NA	NA	NA	NA	NA	GG_celegans
TRINITY_GG_13796_c0_g1_i1.p1	100	80	NA	NA	NA	NA	NA	NA	GG_celegans
TRINITY_GG_5018_c0_g1_i1.p1	100	90	NA	NA	NA	NA	NA	NA	GG_celegans
TRINITY_GG_16057_c0_g1_i1.p1	100	65	NA	NA	NA	NA	NA	NA	GG_celegans
TRINITY_GG_18145_c0_g1_i1.p2	100	74	NA	NA	NA	NA	NA	NA	GG_celegans
TRINITY_GG_6879_c0_g1_i1.p1	100	95	NA	NA	NA	NA	NA	NA	GG_celegans
TRINITY_GG_10946_c0_g1_i1.p3	100	74	NA	NA	NA	NA	NA	NA	GG_celegans
TRINITY_GG_23045_c0_g1_i1.p1	100	74	NA	NA	NA	NA	NA	NA	GG_celegans
TRINITY_GG_23029_c0_g1_i1.p3	100	74	NA	NA	NA	NA	NA	NA	GG_celegans
TRINITY_GG_23030_c0_g1_i1.p2	100	82	NA	NA	NA	NA	NA	NA	GG_celegans
TRINITY_GG_9313_c1_g1_i1.p1	100	95	NA	NA	NA	NA	NA	NA	GG_celegans
TRINITY_GG_19646_c0_g1_i1.p6	100	69	NA	NA	NA	NA	NA	NA	GG_celegans
TRINITY_GG_16116_c0_g1_i1.p1	100	85	NA	NA	NA	NA	NA	NA	GG_celegans
TRINITY_GG_4212_c0_g1_i1.p1	100	84	NA	NA	NA	NA	NA	NA	GG_celegans
TRINITY_GG_18449_c1_g1_i1.p1	100	71	NA	NA	NA	NA	NA	NA	GG_celegans
TRINITY_GG_10287_c0_g1_i2.p1	100	91	NA	NA	NA	NA	NA	NA	GG_celegans
TRINITY_GG_16580_c0_g1_i1.p1	100	92	NA	NA	NA	NA	NA	NA	GG_celegans
TRINITY_GG_21060_c0_g1_i1.p1	100	98	NA	NA	NA	NA	NA	NA	GG_celegans
TRINITY_GG_11549_c0_g1_i1.p1	100	81	NA	NA	NA	NA	NA	NA	GG_celegans
TRINITY_GG_20988_c0_g1_i1.p1	100	79	NA	NA	NA	NA	NA	NA	GG_celegans
TRINITY_GG_17937_c0_g1_i1.p1	100	76	NA	NA	NA	NA	NA	NA	GG_celegans
TRINITY_GG_17964_c0_g1_i1.p1	100	77	NA	NA	NA	NA	NA	NA	GG_celegans
TRINITY_GG_11489_c0_g1_i1.p1	100	89	NA	NA	NA	NA	NA	NA	GG_celegans
TRINITY_GG_13457_c0_g1_i2.p4	100	76	NA	NA	NA	NA	NA	NA	GG_celegans
TRINITY_GG_13676_c0_g1_i1.p2	100	77	NA	NA	NA	NA	NA	NA	GG_celegans
TRINITY_GG_1153_c0_g1_i1.p1	100	50	NA	NA	NA	NA	NA	NA	GG_celegans
TRINITY_GG_5715_c0_g1_i1.p2	100	71	NA	NA	NA	NA	NA	NA	GG_celegans
TRINITY_GG_19393_c0_g1_i1.p1	100	92	NA	NA	NA	NA	NA	NA	GG_celegans
TRINITY_GG_2221_c0_g1_i1.p1	100	94	NA	NA	NA	NA	NA	NA	GG_celegans
TRINITY_GG_14785_c0_g1_i1.p1	100	67	NA	NA	NA	NA	NA	NA	GG_celegans
TRINITY_GG_10694_c0_g1_i1.p1	100	74	NA	NA	NA	NA	NA	NA	GG_celegans
TRINITY_GG_18366_c0_g1_i1.p1	100	94	NA	NA	NA	NA	NA	NA	GG_celegans
TRINITY_GG_21516_c0_g1_i1.p3	100	86	NA	NA	NA	NA	NA	NA	GG_celegans
TRINITY_GG_8011_c0_g1_i1.p1	100	89	NA	NA	NA	NA	NA	NA	GG_celegans
TRINITY_GG_19564_c0_g1_i1.p1	100	88	NA	NA	NA	NA	NA	NA	GG_celegans
TRINITY_GG_5088_c0_g1_i1.p8	100	95	NA	NA	NA	NA	NA	NA	GG_celegans
TRINITY_GG_16688_c0_g1_i1.p3	100	69	NA	NA	NA	NA	NA	NA	GG_celegans
TRINITY_GG_6856_c0_g1_i1.p1	100	85	NA	NA	NA	NA	NA	NA	GG_celegans
TRINITY_GG_3651_c0_g1_i1.p1	100	63	NA	NA	NA	NA	NA	NA	GG_celegans
TRINITY_GG_304_c0_g1_i1.p1	100	68	NA	NA	NA	NA	NA	NA	GG_celegans
TRINITY_GG_266_c1_g1_i1.p1	100	92	NA	NA	NA	NA	NA	NA	GG_celegans
TRINITY_GG_15466_c0_g1_i1.p1	100	94	NA	NA	NA	NA	NA	NA	GG_celegans
TRINITY_GG_6140_c0_g1_i1.p1	100	76	NA	NA	NA	NA	NA	NA	GG_celegans
TRINITY_GG_5650_c0_g1_i1.p3	100	74	NA	NA	NA	NA	NA	NA	GG_celegans
TRINITY_GG_18552_c0_g1_i1.p1	100	94	NA	NA	NA	NA	NA	NA	GG_celegans
TRINITY_GG_12505_c1_g1_i1.p1	100	68	NA	NA	NA	NA	NA	NA	GG_celegans
TRINITY_GG_18882_c0_g1_i1.p2	100	64	NA	NA	NA	NA	NA	NA	GG_celegans
TRINITY_GG_15203_c0_g1_i1.p2	100	91	NA	NA	NA	NA	NA	NA	GG_celegans
TRINITY_GG_7848_c0_g1_i1.p3	100	60	NA	NA	NA	NA	NA	NA	GG_celegans
TRINITY_GG_7848_c1_g1_i1.p3	100	60	NA	NA	NA	NA	NA	NA	GG_celegans
TRINITY_GG_3699_c1_g1_i1.p1	100	73	NA	NA	NA	NA	NA	NA	GG_celegans
TRINITY_GG_4503_c0_g1_i3.p1	100	68	NA	NA	NA	NA	NA	NA	GG_celegans
TRINITY_GG_12359_c0_g1_i1.p2	100	71	NA	NA	NA	NA	NA	NA	GG_celegans
TRINITY_GG_5263_c0_g1_i2.p1	100	86	NA	NA	NA	NA	NA	NA	GG_celegans
TRINITY_GG_16452_c0_g1_i1.p1	100	69	NA	NA	NA	NA	NA	NA	GG_celegans
TRINITY_GG_16194_c0_g1_i1.p3	100	57	NA	NA	NA	NA	NA	NA	GG_celegans
TRINITY_GG_16206_c0_g1_i1.p4	100	57	NA	NA	NA	NA	NA	NA	GG_celegans
TRINITY_GG_9978_c1_g1_i1.p4	100	55	NA	NA	NA	NA	NA	NA	GG_celegans
TRINITY_GG_22304_c0_g1_i2.p1	100	73	NA	NA	NA	NA	NA	NA	GG_celegans
TRINITY_GG_11746_c0_g1_i1.p1	100	99	NA	NA	NA	NA	NA	NA	GG_celegans
TRINITY_GG_4121_c0_g1_i1.p1	100	70	NA	NA	NA	NA	NA	NA	GG_celegans
TRINITY_GG_13616_c0_g1_i1.p2	100	64	NA	NA	NA	NA	NA	NA	GG_celegans
TRINITY_GG_1200_c0_g1_i1.p1	100	78	NA	NA	NA	NA	NA	NA	GG_celegans
TRINITY_GG_205_c0_g1_i1.p1	100	96	NA	NA	NA	NA	NA	NA	GG_celegans
TRINITY_GG_4279_c0_g1_i1.p1	100	96	NA	NA	NA	NA	NA	NA	GG_celegans
TRINITY_GG_2064_c0_g1_i4.p1	100	92	NA	NA	NA	NA	NA	NA	GG_celegans
TRINITY_GG_2064_c0_g1_i4.p2	100	68	NA	NA	NA	NA	NA	NA	GG_celegans
TRINITY_GG_9169_c0_g1_i1.p1	100	89	NA	NA	NA	NA	NA	NA	GG_celegans
TRINITY_GG_16494_c0_g1_i2.p1	100	92	NA	NA	NA	NA	NA	NA	GG_celegans
TRINITY_GG_21530_c0_g1_i1.p1	100	93	NA	NA	NA	NA	NA	NA	GG_celegans
TRINITY_GG_6203_c0_g1_i1.p1	100	74	NA	NA	NA	NA	NA	NA	GG_celegans
TRINITY_GG_22758_c0_g1_i1.p1	100	73	NA	NA	NA	NA	NA	NA	GG_celegans
TRINITY_GG_1863_c0_g1_i1.p1	100	70	NA	NA	NA	NA	NA	NA	GG_celegans
TRINITY_GG_6805_c0_g1_i1.p2	100	89	NA	NA	NA	NA	NA	NA	GG_celegans
TRINITY_GG_17551_c1_g1_i1.p1	100	73	NA	NA	NA	NA	NA	NA	GG_celegans
TRINITY_GG_9425_c0_g1_i1.p2	100	74	NA	NA	NA	NA	NA	NA	GG_celegans
TRINITY_GG_10805_c0_g1_i1.p1	100	95	NA	NA	NA	NA	NA	NA	GG_celegans
TRINITY_GG_2346_c1_g1_i2.p1	100	84	NA	NA	NA	NA	NA	NA	GG_celegans
TRINITY_GG_10799_c1_g1_i4.p1	100	63	NA	NA	NA	NA	NA	NA	GG_celegans
TRINITY_GG_18116_c0_g1_i1.p2	100	66	NA	NA	NA	NA	NA	NA	GG_celegans
TRINITY_GG_5643_c0_g1_i1.p1	100	89	NA	NA	NA	NA	NA	NA	GG_celegans
TRINITY_GG_3535_c0_g1_i1.p1	100	83	NA	NA	NA	NA	NA	NA	GG_celegans
TRINITY_GG_3423_c2_g1_i1.p2	100	63	NA	NA	NA	NA	NA	NA	GG_celegans
TRINITY_GG_9584_c0_g1_i1.p1	100	92	NA	NA	NA	NA	NA	NA	GG_celegans
TRINITY_GG_1570_c0_g1_i1.p1	100	72	NA	NA	NA	NA	NA	NA	GG_celegans
TRINITY_GG_2393_c0_g1_i1.p2	100	57	NA	NA	NA	NA	NA	NA	GG_celegans
TRINITY_GG_10699_c0_g1_i1.p1	100	89	NA	NA	NA	NA	NA	NA	GG_celegans
TRINITY_GG_21541_c0_g1_i1.p1	100	86	NA	NA	NA	NA	NA	NA	GG_celegans
TRINITY_GG_21536_c0_g1_i1.p1	100	97	NA	NA	NA	NA	NA	NA	GG_celegans
TRINITY_GG_17802_c0_g1_i1.p6	100	44	NA	NA	NA	NA	NA	NA	GG_celegans
TRINITY_GG_12882_c0_g1_i1.p1	100	79	NA	NA	NA	NA	NA	NA	GG_celegans
TRINITY_GG_321_c0_g1_i1.p1	100	86	NA	NA	NA	NA	NA	NA	GG_celegans
TRINITY_GG_23093_c0_g1_i1.p1	100	67	NA	NA	NA	NA	NA	NA	GG_celegans
TRINITY_GG_788_c0_g1_i1.p1	100	70	NA	NA	NA	NA	NA	NA	GG_celegans
TRINITY_GG_12497_c0_g1_i1.p2	100	61	NA	NA	NA	NA	NA	NA	GG_celegans
TRINITY_GG_17676_c0_g1_i1.p4	100	34	NA	NA	NA	NA	NA	NA	GG_celegans
TRINITY_GG_18891_c0_g1_i1.p1	100	77	NA	NA	NA	NA	NA	NA	GG_celegans
TRINITY_GG_17014_c0_g1_i2.p1	100	75	NA	NA	NA	NA	NA	NA	GG_celegans
TRINITY_GG_19015_c0_g1_i1.p1	100	59	NA	NA	NA	NA	NA	NA	GG_celegans
TRINITY_GG_14611_c0_g1_i1.p1	100	91	NA	NA	NA	NA	NA	NA	GG_celegans
TRINITY_GG_14596_c0_g1_i1.p1	100	79	NA	NA	NA	NA	NA	NA	GG_celegans
TRINITY_GG_21630_c1_g1_i1.p6	100	80	NA	NA	NA	NA	NA	NA	GG_celegans
TRINITY_GG_1798_c0_g1_i1.p1	100	85	NA	NA	NA	NA	NA	NA	GG_celegans
TRINITY_GG_23156_c1_g1_i1.p1	100	84	NA	NA	NA	NA	NA	NA	GG_celegans
TRINITY_GG_18894_c1_g1_i1.p1	100	77	NA	NA	NA	NA	NA	NA	GG_celegans
TRINITY_GG_2622_c0_g1_i1.p2	100	46	NA	NA	NA	NA	NA	NA	GG_celegans
TRINITY_GG_9857_c1_g1_i1.p1	100	71	NA	NA	NA	NA	NA	NA	GG_celegans
TRINITY_GG_13712_c0_g1_i2.p1	100	69	NA	NA	NA	NA	NA	NA	GG_celegans
TRINITY_GG_9419_c0_g1_i1.p3	100	86	NA	NA	NA	NA	NA	NA	GG_celegans
TRINITY_GG_17478_c0_g1_i2.p1	100	89	NA	NA	NA	NA	NA	NA	GG_celegans
TRINITY_GG_3571_c0_g1_i1.p1	100	92	NA	NA	NA	NA	NA	NA	GG_celegans
TRINITY_GG_2204_c0_g1_i1.p2	100	88	NA	NA	NA	NA	NA	NA	GG_celegans
TRINITY_GG_15286_c0_g1_i1.p1	100	40	NA	NA	NA	NA	NA	NA	GG_celegans
TRINITY_GG_7798_c0_g1_i1.p1	100	97	NA	NA	NA	NA	NA	NA	GG_celegans
TRINITY_GG_17486_c0_g1_i1.p1	100	67	NA	NA	NA	NA	NA	NA	GG_celegans
TRINITY_GG_21844_c1_g1_i1.p1	100	80	NA	NA	NA	NA	NA	NA	GG_celegans
TRINITY_GG_20175_c0_g1_i1.p2	100	82	NA	NA	NA	NA	NA	NA	GG_celegans
TRINITY_GG_8654_c0_g1_i1.p1	100	66	NA	NA	NA	NA	NA	NA	GG_celegans
TRINITY_GG_14850_c0_g1_i1.p1	100	70	NA	NA	NA	NA	NA	NA	GG_celegans
TRINITY_GG_4991_c0_g1_i1.p3	100	75	NA	NA	NA	NA	NA	NA	GG_celegans
TRINITY_GG_4977_c0_g1_i1.p1	100	83	NA	NA	NA	NA	NA	NA	GG_celegans
TRINITY_GG_2687_c0_g1_i1.p1	100	37	NA	NA	NA	NA	NA	NA	GG_celegans
TRINITY_GG_19982_c0_g1_i1.p2	100	69	NA	NA	NA	NA	NA	NA	GG_celegans
TRINITY_GG_4577_c0_g1_i2.p2	100	86	NA	NA	NA	NA	NA	NA	GG_celegans
TRINITY_GG_22965_c0_g1_i1.p1	100	76	NA	NA	NA	NA	NA	NA	GG_celegans
TRINITY_GG_6420_c0_g1_i1.p1	100	80	NA	NA	NA	NA	NA	NA	GG_celegans
TRINITY_GG_15693_c0_g1_i1.p2	100	70	NA	NA	NA	NA	NA	NA	GG_celegans
TRINITY_GG_4020_c0_g1_i1.p1	100	83	NA	NA	NA	NA	NA	NA	GG_celegans
TRINITY_GG_3336_c0_g1_i2.p1	100	95	NA	NA	NA	NA	NA	NA	GG_celegans
TRINITY_GG_1786_c0_g1_i1.p2	100	71	NA	NA	NA	NA	NA	NA	GG_celegans
TRINITY_GG_13588_c0_g1_i1.p1	100	71	NA	NA	NA	NA	NA	NA	GG_celegans
TRINITY_GG_1769_c0_g1_i1.p2	100	74	NA	NA	NA	NA	NA	NA	GG_celegans
TRINITY_GG_1767_c0_g1_i1.p1	100	74	NA	NA	NA	NA	NA	NA	GG_celegans
TRINITY_GG_1194_c0_g1_i1.p1	100	68	NA	NA	NA	NA	NA	NA	GG_celegans
TRINITY_GG_13589_c0_g1_i1.p1	100	73	NA	NA	NA	NA	NA	NA	GG_celegans
TRINITY_GG_13582_c0_g1_i1.p1	100	71	NA	NA	NA	NA	NA	NA	GG_celegans
TRINITY_GG_14133_c0_g1_i1.p2	100	81	NA	NA	NA	NA	NA	NA	GG_celegans
TRINITY_GG_17915_c2_g1_i1.p1	100	90	NA	NA	NA	NA	NA	NA	GG_celegans
TRINITY_GG_17903_c1_g1_i1.p1	100	57	NA	NA	NA	NA	NA	NA	GG_celegans
TRINITY_GG_9155_c0_g1_i1.p1	100	84	NA	NA	NA	NA	NA	NA	GG_celegans
TRINITY_GG_8454_c0_g1_i1.p1	100	50	NA	NA	NA	NA	NA	NA	GG_celegans
TRINITY_GG_8463_c0_g1_i1.p1	100	83	NA	NA	NA	NA	NA	NA	GG_celegans
TRINITY_GG_18869_c0_g1_i1.p1	100	82	NA	NA	NA	NA	NA	NA	GG_celegans
TRINITY_GG_953_c0_g1_i1.p2	100	60	NA	NA	NA	NA	NA	NA	GG_celegans
TRINITY_GG_16483_c0_g1_i1.p2	100	88	NA	NA	NA	NA	NA	NA	GG_celegans
TRINITY_GG_10906_c0_g1_i1.p1	100	85	NA	NA	NA	NA	NA	NA	GG_celegans
TRINITY_GG_3052_c0_g1_i1.p1	100	96	NA	NA	NA	NA	NA	NA	GG_celegans
TRINITY_GG_3084_c0_g1_i1.p1	100	65	NA	NA	NA	NA	NA	NA	GG_celegans
TRINITY_GG_14460_c0_g1_i1.p2	100	70	NA	NA	NA	NA	NA	NA	GG_celegans
TRINITY_GG_3407_c0_g1_i1.p2	100	79	NA	NA	NA	NA	NA	NA	GG_celegans
TRINITY_GG_5889_c0_g1_i1.p2	100	62	NA	NA	NA	NA	NA	NA	GG_celegans
TRINITY_GG_6343_c0_g1_i1.p1	100	49	NA	NA	NA	NA	NA	NA	GG_celegans
TRINITY_GG_6342_c0_g1_i1.p1	100	87	NA	NA	NA	NA	NA	NA	GG_celegans
TRINITY_GG_6328_c0_g1_i1.p1	100	96	NA	NA	NA	NA	NA	NA	GG_celegans
TRINITY_GG_6347_c0_g1_i1.p1	100	90	NA	NA	NA	NA	NA	NA	GG_celegans
TRINITY_GG_7065_c0_g1_i1.p1	100	76	NA	NA	NA	NA	NA	NA	GG_celegans
TRINITY_GG_14882_c0_g1_i1.p1	100	83	NA	NA	NA	NA	NA	NA	GG_celegans
TRINITY_GG_3805_c0_g1_i1.p3	100	75	NA	NA	NA	NA	NA	NA	GG_celegans
TRINITY_GG_19984_c0_g1_i1.p1	100	58	NA	NA	NA	NA	NA	NA	GG_celegans
TRINITY_GG_6733_c0_g1_i2.p2	100	58	NA	NA	NA	NA	NA	NA	GG_celegans
TRINITY_GG_8866_c0_g1_i1.p2	100	71	NA	NA	NA	NA	NA	NA	GG_celegans
TRINITY_GG_17748_c0_g1_i1.p3	100	27	NA	NA	NA	NA	NA	NA	GG_celegans
TRINITY_GG_22521_c0_g1_i1.p1	100	89	NA	NA	NA	NA	NA	NA	GG_celegans
TRINITY_GG_10311_c0_g1_i1.p13	100	34	NA	NA	NA	NA	NA	NA	GG_celegans
TRINITY_GG_10017_c0_g1_i2.p1	100	72	NA	NA	NA	NA	NA	NA	GG_celegans
TRINITY_GG_20363_c0_g1_i1.p1	100	47	NA	NA	NA	NA	NA	NA	GG_celegans
TRINITY_GG_13298_c0_g1_i1.p1	100	95	NA	NA	NA	NA	NA	NA	GG_celegans
TRINITY_GG_973_c1_g1_i1.p1	100	91	NA	NA	NA	NA	NA	NA	GG_celegans
TRINITY_GG_10923_c0_g1_i1.p1	100	91	NA	NA	NA	NA	NA	NA	GG_celegans
TRINITY_GG_21583_c0_g1_i1.p2	100	78	NA	NA	NA	NA	NA	NA	GG_celegans
TRINITY_GG_21583_c0_g1_i2.p2	100	56	NA	NA	NA	NA	NA	NA	GG_celegans
TRINITY_GG_8095_c0_g1_i1.p2	100	76	NA	NA	NA	NA	NA	NA	GG_celegans
TRINITY_GG_8058_c1_g1_i2.p1	100	97	NA	NA	NA	NA	NA	NA	GG_celegans
TRINITY_GG_3378_c0_g1_i1.p1	100	98	NA	NA	NA	NA	NA	NA	GG_celegans
TRINITY_GG_17654_c0_g1_i1.p1	100	51	NA	NA	NA	NA	NA	NA	GG_celegans
TRINITY_GG_6073_c1_g1_i1.p2	100	58	NA	NA	NA	NA	NA	NA	GG_celegans
TRINITY_GG_17658_c0_g1_i6.p2	100	91	NA	NA	NA	NA	NA	NA	GG_celegans
TRINITY_GG_7551_c0_g1_i1.p1	100	86	NA	NA	NA	NA	NA	NA	GG_celegans
TRINITY_GG_718_c0_g1_i1.p1	100	90	NA	NA	NA	NA	NA	NA	GG_celegans
TRINITY_GG_2989_c0_g1_i2.p3	100	73	NA	NA	NA	NA	NA	NA	GG_celegans
TRINITY_GG_13953_c0_g1_i1.p1	100	60	NA	NA	NA	NA	NA	NA	GG_celegans
TRINITY_GG_735_c0_g1_i1.p6	100	77	NA	NA	NA	NA	NA	NA	GG_celegans
TRINITY_GG_10159_c0_g1_i1.p1	100	92	NA	NA	NA	NA	NA	NA	GG_celegans
TRINITY_GG_11787_c0_g1_i2.p3	100	62	NA	NA	NA	NA	NA	NA	GG_celegans
TRINITY_GG_12619_c0_g1_i1.p1	100	93	NA	NA	NA	NA	NA	NA	GG_celegans
TRINITY_GG_94_c0_g1_i1.p1	100	90	NA	NA	NA	NA	NA	NA	GG_celegans
TRINITY_GG_12632_c0_g1_i1.p1	100	91	NA	NA	NA	NA	NA	NA	GG_celegans
TRINITY_GG_11362_c0_g1_i1.p1	100	59	NA	NA	NA	NA	NA	NA	GG_celegans
TRINITY_GG_13306_c1_g1_i1.p2	100	84	NA	NA	NA	NA	NA	NA	GG_celegans
TRINITY_GG_13914_c0_g1_i1.p1	100	91	NA	NA	NA	NA	NA	NA	GG_celegans
TRINITY_GG_20214_c1_g1_i1.p1	100	71	NA	NA	NA	NA	NA	NA	GG_celegans
TRINITY_GG_14163_c0_g1_i3.p2	100	68	NA	NA	NA	NA	NA	NA	GG_celegans
TRINITY_GG_18979_c0_g1_i1.p1	100	79	NA	NA	NA	NA	NA	NA	GG_celegans
TRINITY_GG_3854_c0_g1_i1.p1	100	73	NA	NA	NA	NA	NA	NA	GG_celegans
TRINITY_GG_14989_c0_g1_i1.p4	100	74	NA	NA	NA	NA	NA	NA	GG_celegans
TRINITY_GG_3850_c0_g1_i1.p1	100	68	NA	NA	NA	NA	NA	NA	GG_celegans
TRINITY_GG_18541_c0_g1_i1.p1	100	50	NA	NA	NA	NA	NA	NA	GG_celegans
TRINITY_GG_18565_c0_g1_i1.p1	100	80	NA	NA	NA	NA	NA	NA	GG_celegans
TRINITY_GG_3155_c0_g1_i1.p1	100	78	NA	NA	NA	NA	NA	NA	GG_celegans
TRINITY_GG_7799_c0_g1_i1.p1	100	97	NA	NA	NA	NA	NA	NA	GG_celegans
TRINITY_GG_10621_c3_g1_i1.p1	100	92	NA	NA	NA	NA	NA	NA	GG_celegans
TRINITY_GG_10762_c0_g1_i1.p3	100	93	NA	NA	NA	NA	NA	NA	GG_celegans
TRINITY_GG_22285_c0_g1_i1.p2	100	53	NA	NA	NA	NA	NA	NA	GG_celegans
TRINITY_GG_19741_c0_g1_i1.p1	100	81	NA	NA	NA	NA	NA	NA	GG_celegans
TRINITY_GG_19761_c0_g1_i1.p1	100	73	NA	NA	NA	NA	NA	NA	GG_celegans
TRINITY_GG_16066_c0_g1_i1.p1	100	73	NA	NA	NA	NA	NA	NA	GG_celegans
TRINITY_GG_4034_c0_g1_i1.p1	100	69	NA	NA	NA	NA	NA	NA	GG_celegans
TRINITY_GG_17363_c0_g1_i1.p1	100	67	NA	NA	NA	NA	NA	NA	GG_celegans
TRINITY_GG_2454_c0_g1_i1.p2	100	70	NA	NA	NA	NA	NA	NA	GG_celegans
TRINITY_GG_23003_c0_g1_i1.p1	100	89	NA	NA	NA	NA	NA	NA	GG_celegans
TRINITY_GG_11670_c1_g1_i1.p1	100	77	NA	NA	NA	NA	NA	NA	GG_celegans
TRINITY_GG_9625_c0_g1_i1.p1	100	87	NA	NA	NA	NA	NA	NA	GG_celegans
TRINITY_GG_9649_c1_g1_i1.p2	100	90	NA	NA	NA	NA	NA	NA	GG_celegans
TRINITY_GG_7900_c1_g1_i1.p1	100	90	NA	NA	NA	NA	NA	NA	GG_celegans
TRINITY_GG_14356_c0_g1_i1.p2	100	93	NA	NA	NA	NA	NA	NA	GG_celegans
TRINITY_GG_14338_c0_g1_i1.p1	100	98	NA	NA	NA	NA	NA	NA	GG_celegans
TRINITY_GG_14341_c0_g1_i1.p1	100	88	NA	NA	NA	NA	NA	NA	GG_celegans
TRINITY_GG_14307_c1_g1_i1.p4	100	75	NA	NA	NA	NA	NA	NA	GG_celegans
TRINITY_GG_14324_c0_g1_i1.p9	100	60	NA	NA	NA	NA	NA	NA	GG_celegans
TRINITY_GG_18511_c0_g1_i1.p1	100	94	NA	NA	NA	NA	NA	NA	GG_celegans
TRINITY_GG_8052_c0_g1_i1.p1	100	89	NA	NA	NA	NA	NA	NA	GG_celegans
TRINITY_GG_8059_c0_g1_i1.p1	100	86	NA	NA	NA	NA	NA	NA	GG_celegans
TRINITY_GG_2801_c0_g1_i1.p2	100	85	NA	NA	NA	NA	NA	NA	GG_celegans
TRINITY_GG_14495_c0_g1_i1.p1	100	65	NA	NA	NA	NA	NA	NA	GG_celegans
TRINITY_GG_16589_c0_g1_i1.p1	100	66	NA	NA	NA	NA	NA	NA	GG_celegans
TRINITY_GG_6649_c0_g1_i1.p1	100	92	NA	NA	NA	NA	NA	NA	GG_celegans
TRINITY_GG_20189_c0_g1_i1.p1	100	69	NA	NA	NA	NA	NA	NA	GG_celegans
TRINITY_GG_8652_c0_g1_i1.p2	100	46	NA	NA	NA	NA	NA	NA	GG_celegans
TRINITY_GG_7338_c0_g1_i1.p3	100	55	NA	NA	NA	NA	NA	NA	GG_celegans
TRINITY_GG_9114_c0_g1_i1.p1	100	86	NA	NA	NA	NA	NA	NA	GG_celegans
TRINITY_GG_9096_c0_g1_i3.p3	100	63	NA	NA	NA	NA	NA	NA	GG_celegans
TRINITY_GG_10642_c0_g1_i1.p1	100	76	NA	NA	NA	NA	NA	NA	GG_celegans
TRINITY_GG_23000_c0_g1_i1.p1	100	74	NA	NA	NA	NA	NA	NA	GG_celegans
TRINITY_GG_10638_c0_g1_i1.p2	100	72	NA	NA	NA	NA	NA	NA	GG_celegans
TRINITY_GG_8380_c1_g1_i1.p1	100	74	NA	NA	NA	NA	NA	NA	GG_celegans
TRINITY_GG_6911_c0_g1_i1.p4	100	34	NA	NA	NA	NA	NA	NA	GG_celegans
TRINITY_GG_11186_c0_g1_i1.p2	100	90	NA	NA	NA	NA	NA	NA	GG_celegans
TRINITY_GG_16684_c0_g1_i2.p1	100	76	NA	NA	NA	NA	NA	NA	GG_celegans
TRINITY_GG_4542_c0_g1_i1.p1	100	70	NA	NA	NA	NA	NA	NA	GG_celegans
TRINITY_GG_7820_c0_g1_i1.p1	100	87	NA	NA	NA	NA	NA	NA	GG_celegans
TRINITY_GG_41_c0_g1_i1.p1	100	68	NA	NA	NA	NA	NA	NA	GG_celegans
TRINITY_GG_15025_c2_g1_i1.p1	100	47	NA	NA	NA	NA	NA	NA	GG_celegans
TRINITY_GG_18183_c0_g1_i1.p1	100	68	NA	NA	NA	NA	NA	NA	GG_celegans
TRINITY_GG_18185_c0_g1_i1.p2	100	76	NA	NA	NA	NA	NA	NA	GG_celegans
TRINITY_GG_9123_c0_g1_i1.p1	100	99	NA	NA	NA	NA	NA	NA	GG_celegans
TRINITY_GG_21795_c0_g1_i1.p1	100	99	NA	NA	NA	NA	NA	NA	GG_celegans
TRINITY_GG_21792_c0_g1_i1.p3	100	70	NA	NA	NA	NA	NA	NA	GG_celegans
TRINITY_GG_16447_c1_g1_i1.p1	100	89	NA	NA	NA	NA	NA	NA	GG_celegans
TRINITY_GG_3370_c0_g1_i1.p1	100	97	NA	NA	NA	NA	NA	NA	GG_celegans
TRINITY_GG_20618_c2_g1_i1.p2	100	80	NA	NA	NA	NA	NA	NA	GG_celegans
TRINITY_GG_9079_c0_g1_i1.p3	100	62	NA	NA	NA	NA	NA	NA	GG_celegans
TRINITY_GG_8031_c0_g1_i1.p1	100	58	NA	NA	NA	NA	NA	NA	GG_celegans
TRINITY_GG_12896_c0_g1_i1.p3	100	64	NA	NA	NA	NA	NA	NA	GG_celegans
TRINITY_GG_8016_c0_g1_i1.p2	100	44	NA	NA	NA	NA	NA	NA	GG_celegans
TRINITY_GG_18928_c1_g1_i1.p2	100	54	NA	NA	NA	NA	NA	NA	GG_celegans
TRINITY_GG_7331_c0_g1_i1.p1	100	78	NA	NA	NA	NA	NA	NA	GG_celegans
TRINITY_GG_20625_c0_g1_i1.p2	100	55	NA	NA	NA	NA	NA	NA	GG_celegans
TRINITY_GG_3549_c1_g1_i1.p1	100	72	NA	NA	NA	NA	NA	NA	GG_celegans
TRINITY_GG_11945_c0_g1_i1.p3	100	84	NA	NA	NA	NA	NA	NA	GG_celegans
TRINITY_GG_22467_c0_g1_i1.p2	100	65	NA	NA	NA	NA	NA	NA	GG_celegans
TRINITY_GG_1450_c0_g1_i1.p1	100	55	NA	NA	NA	NA	NA	NA	GG_celegans
TRINITY_GG_6087_c0_g1_i1.p1	98.97	97	NA	NA	NA	NA	NA	NA	GG_celegans
TRINITY_GG_5739_c0_g1_i1.p1	98.96	96	NA	NA	NA	NA	NA	NA	GG_celegans
TRINITY_GG_9036_c0_g1_i1.p4	98.95	95	NA	NA	NA	NA	NA	NA	GG_celegans
TRINITY_GG_22541_c0_g1_i1.p1	98.94	94	NA	NA	NA	NA	NA	NA	GG_celegans
TRINITY_GG_552_c3_g1_i1.p1	98.9	91	NA	NA	NA	NA	NA	NA	GG_celegans
TRINITY_GG_75_c0_g1_i3.p1	98.85	87	NA	NA	NA	NA	NA	NA	GG_celegans
TRINITY_GG_7069_c1_g1_i1.p1	98.81	84	NA	NA	NA	NA	NA	NA	GG_celegans
TRINITY_GG_10845_c0_g1_i1.p2	98.78	82	NA	NA	NA	NA	NA	NA	GG_celegans
TRINITY_GG_21828_c0_g1_i1.p1	98.77	81	NA	NA	NA	NA	NA	NA	GG_celegans
TRINITY_GG_6802_c0_g1_i1.p1	98.75	80	NA	NA	NA	NA	NA	NA	GG_celegans
TRINITY_GG_3223_c0_g1_i1.p2	98.61	72	NA	NA	NA	NA	NA	NA	GG_celegans
TRINITY_GG_7074_c0_g1_i1.p1	98.48	66	NA	NA	NA	NA	NA	NA	GG_celegans
TRINITY_GG_866_c0_g1_i1.p2	98.46	65	NA	NA	NA	NA	NA	NA	GG_celegans
TRINITY_GG_835_c0_g1_i1.p1	98.31	59	NA	NA	NA	NA	NA	NA	GG_celegans
TRINITY_GG_17941_c0_g1_i1.p1	97.92	96	NA	NA	NA	NA	NA	NA	GG_celegans
TRINITY_GG_5835_c0_g1_i1.p1	97.78	90	NA	NA	NA	NA	NA	NA	GG_celegans
TRINITY_GG_11521_c0_g1_i2.p1	97.53	81	NA	NA	NA	NA	NA	NA	GG_celegans
TRINITY_GG_6216_c0_g1_i1.p3	97.22	72	NA	NA	NA	NA	NA	NA	GG_celegans
TRINITY_GG_6245_c0_g1_i2.p1	97.1	69	NA	NA	NA	NA	NA	NA	GG_celegans
TRINITY_GG_16600_c0_g1_i1.p1	96.55	87	NA	NA	NA	NA	NA	NA	GG_celegans
TRINITY_GG_745_c0_g1_i1.p1	95.83	72	NA	NA	NA	NA	NA	NA	GG_celegans
TRINITY_GG_17530_c0_g1_i1.p1	95.18	83	NA	NA	NA	NA	NA	NA	GG_celegans
TRINITY_GG_18108_c0_g1_i1.p2	94.74	76	NA	NA	NA	NA	NA	NA	GG_celegans
TRINITY_GG_2581_c0_g1_i1.p2	94.25	87	NA	NA	NA	NA	NA	NA	GG_celegans
TRINITY_GG_5016_c0_g1_i1.p1	94.03	67	NA	NA	NA	NA	NA	NA	GG_celegans
TRINITY_GG_13891_c1_g1_i1.p1	93.33	90	NA	NA	NA	NA	NA	NA	GG_celegans
TRINITY_GG_14299_c0_g1_i1.p1	93.33	75	NA	NA	NA	NA	NA	NA	GG_celegans
TRINITY_GG_12244_c0_g1_i1.p1	91.95	87	NA	NA	NA	NA	NA	NA	GG_celegans
TRINITY_GG_20388_c0_g1_i1.p1	91.95	87	NA	NA	NA	NA	NA	NA	GG_celegans
TRINITY_GG_6954_c0_g1_i1.p1	91.84	98	NA	NA	NA	NA	NA	NA	GG_celegans
TRINITY_GG_4392_c0_g1_i2.p1	90.91	66	NA	NA	NA	NA	NA	NA	GG_celegans
TRINITY_GG_6607_c0_g1_i1.p2	89.39	66	NA	NA	NA	NA	NA	NA	GG_celegans
TRINITY_GG_5958_c0_g1_i1.p1	89.19	74	NA	NA	NA	NA	NA	NA	GG_celegans
TRINITY_GG_2239_c0_g1_i1.p1	89.13	92	NA	NA	NA	NA	NA	NA	GG_celegans
TRINITY_GG_19422_c1_g1_i1.p1	89.09	55	NA	NA	NA	NA	NA	NA	GG_celegans
TRINITY_GG_2595_c0_g1_i1.p2	89.01	91	NA	NA	NA	NA	NA	NA	GG_celegans
TRINITY_GG_18274_c2_g1_i1.p2	88.31	77	NA	NA	NA	NA	NA	NA	GG_celegans
TRINITY_GG_8219_c0_g1_i1.p1	88.17	93	NA	NA	NA	NA	NA	NA	GG_celegans
TRINITY_GG_9371_c0_g1_i1.p1	88.06	67	NA	NA	NA	NA	NA	NA	GG_celegans
TRINITY_GG_15531_c0_g1_i1.p2	87.91	91	NA	NA	NA	NA	NA	NA	GG_celegans
TRINITY_GG_4175_c0_g1_i1.p1	87.88	99	NA	NA	NA	NA	NA	NA	GG_celegans
TRINITY_GG_16199_c0_g1_i2.p1	87.64	89	NA	NA	NA	NA	NA	NA	GG_celegans
TRINITY_GG_5617_c1_g1_i1.p1	86.96	46	NA	NA	NA	NA	NA	NA	GG_celegans
TRINITY_GG_14629_c0_g1_i1.p3	85.94	64	NA	NA	NA	NA	NA	NA	GG_celegans
TRINITY_GG_18700_c0_g1_i1.p1	85.9	78	NA	NA	NA	NA	NA	NA	GG_celegans
TRINITY_GG_13879_c0_g1_i1.p1	84.71	85	NA	NA	NA	NA	NA	NA	GG_celegans
TRINITY_GG_5835_c2_g1_i1.p1	84.27	89	NA	NA	NA	NA	NA	NA	GG_celegans
TRINITY_GG_499_c0_g1_i1.p3	84	50	NA	NA	NA	NA	NA	NA	GG_celegans
TRINITY_GG_21116_c2_g1_i1.p3	82.61	69	NA	NA	NA	NA	NA	NA	GG_celegans
TRINITY_GG_6355_c1_g1_i1.p1	80.85	94	NA	NA	NA	NA	NA	NA	GG_celegans
TRINITY_GG_10681_c0_g1_i1.p2	80.68	88	NA	NA	NA	NA	NA	NA	GG_celegans
TRINITY_GG_8278_c0_g1_i1.p1	78.75	80	NA	NA	NA	NA	NA	NA	GG_celegans
TRINITY_GG_20673_c0_g1_i1.p1	78.49	93	NA	NA	NA	NA	NA	NA	GG_celegans
TRINITY_GG_2008_c1_g1_i1.p1	78.26	92	NA	NA	NA	NA	NA	NA	GG_celegans
TRINITY_GG_1723_c0_g1_i1.p2	77.78	90	NA	NA	NA	NA	NA	NA	GG_celegans
TRINITY_GG_5166_c0_g1_i1.p3	77.08	96	NA	NA	NA	NA	NA	NA	GG_celegans
TRINITY_GG_6480_c0_g1_i1.p2	76.62	77	NA	NA	NA	NA	NA	NA	GG_celegans
TRINITY_GG_6052_c0_g1_i1.p3	74.39	82	NA	NA	NA	NA	NA	NA	GG_celegans
TRINITY_GG_18441_c1_g1_i1.p2	74.32	74	NA	NA	NA	NA	NA	NA	GG_celegans
TRINITY_GG_10685_c1_g1_i1.p2	72.73	88	NA	NA	NA	NA	NA	NA	GG_celegans
TRINITY_GG_771_c0_g1_i1.p2	72	75	NA	NA	NA	NA	NA	NA	GG_celegans
TRINITY_GG_23101_c2_g1_i2.p2	71.76	85	NA	NA	NA	NA	NA	NA	GG_celegans
TRINITY_GG_2428_c4_g1_i1.p3	71.74	92	NA	NA	NA	NA	NA	NA	GG_celegans
TRINITY_GG_8470_c0_g1_i1.p1	71.43	98	NA	NA	NA	NA	NA	NA	GG_celegans
TRINITY_GG_16454_c1_g1_i1.p1	70.33	91	NA	NA	NA	NA	NA	NA	GG_celegans
TRINITY_GG_16202_c1_g1_i1.p4	70.18	57	NA	NA	NA	NA	NA	NA	GG_celegans
TRINITY_GG_10604_c0_g1_i1.p1	69.57	46	NA	NA	NA	NA	NA	NA	GG_celegans
TRINITY_GG_5848_c0_g1_i1.p1	67.02	94	NA	NA	NA	NA	NA	NA	GG_celegans
TRINITY_GG_5541_c0_g1_i1.p1	66.67	75	NA	NA	NA	NA	NA	NA	GG_celegans
TRINITY_GG_14384_c0_g1_i1.p1	66.67	96	NA	NA	NA	NA	NA	NA	GG_celegans
TRINITY_GG_9722_c1_g1_i1.p1	65.93	91	NA	NA	NA	NA	NA	NA	GG_celegans
TRINITY_GG_5922_c0_g1_i1.p2	65.91	88	NA	NA	NA	NA	NA	NA	GG_celegans
TRINITY_GG_7526_c0_g1_i1.p3	64.86	74	NA	NA	NA	NA	NA	NA	GG_celegans
TRINITY_GG_13760_c0_g1_i1.p6	64.2	81	NA	NA	NA	NA	NA	NA	GG_celegans
TRINITY_GG_18849_c0_g1_i1.p1	63.64	99	NA	NA	NA	NA	NA	NA	GG_celegans
TRINITY_GG_376_c2_g1_i1.p2	62.5	80	NA	NA	NA	NA	NA	NA	GG_celegans
TRINITY_GG_16773_c0_g1_i1.p1	61.8	89	NA	NA	NA	NA	NA	NA	GG_celegans
TRINITY_GG_5354_c1_g1_i1.p1	60	65	NA	NA	NA	NA	NA	NA	GG_celegans
TRINITY_GG_21570_c2_g1_i1.p2	59.7	67	NA	NA	NA	NA	NA	NA	GG_celegans
TRINITY_GG_18158_c1_g1_i1.p3	58.82	68	NA	NA	NA	NA	NA	NA	GG_celegans
TRINITY_GG_18424_c1_g1_i1.p1	58.14	86	NA	NA	NA	NA	NA	NA	GG_celegans
TRINITY_GG_19276_c0_g1_i1.p5	57.53	73	NA	NA	NA	NA	NA	NA	GG_celegans
TRINITY_GG_18681_c0_g1_i6.p2	57.14	77	NA	NA	NA	NA	NA	NA	GG_celegans
TRINITY_GG_19072_c0_g1_i1.p1	56.04	91	NA	NA	NA	NA	NA	NA	GG_celegans
TRINITY_GG_18336_c0_g1_i1.p5	56	50	NA	NA	NA	NA	NA	NA	GG_celegans
TRINITY_GG_19098_c0_g1_i1.p4	55.56	72	NA	NA	NA	NA	NA	NA	GG_celegans
TRINITY_GG_8908_c0_g1_i1.p3	53.33	45	NA	NA	NA	NA	NA	NA	GG_celegans
TRINITY_GG_18983_c0_g1_i1.p2	52.63	76	NA	NA	NA	NA	NA	NA	GG_celegans
TRINITY_GG_17803_c0_g1_i1.p6	52.13	94	NA	NA	NA	NA	NA	NA	GG_celegans
TRINITY_GG_22415_c0_g1_i1.p6	51.55	97	NA	NA	NA	NA	NA	NA	GG_celegans
TRINITY_GG_10627_c0_g1_i2.p11	49.44	89	NA	NA	NA	NA	NA	NA	GG_celegans
TRINITY_GG_16491_c0_g1_i1.p1	49.23	65	NA	NA	NA	NA	NA	NA	GG_celegans
TRINITY_GG_18465_c1_g1_i1.p3	46.15	65	NA	NA	NA	NA	NA	NA	GG_celegans
TRINITY_GG_9988_c0_g1_i1.p8	44.07	59	NA	NA	NA	NA	NA	NA	GG_celegans
TRINITY_GG_5126_c0_g1_i1.p5	37.8	82	NA	NA	NA	NA	NA	NA	GG_celegans
TRINITY_GG_2355_c0_g1_i1.p1	36.84	95	NA	NA	NA	NA	NA	NA	GG_celegans
TRINITY_GG_19302_c1_g1_i1.p3	36.49	74	NA	NA	NA	NA	NA	NA	GG_celegans
TRINITY_GG_13504_c0_g1_i1.p2	28.74	87	NA	NA	NA	NA	NA	NA	GG_celegans
TRINITY_GG_21466_c1_g1_i1.p4	26.37	91	NA	NA	NA	NA	NA	NA	GG_celegans
