# Supplementary material for: Nematode gene annotation by machine-learning-assisted proteotranscriptomics enables proteome-wide evolutionary analysis
Source: HighWire-hosted journal article supplement (doi:10.1101/gr.277070.122), 2023-01-01
Supplement: Supplemental_Table_S7.xlsx [file Supplemental_Table_S7.xlsx]

## Sheet: Legend
Supplemental_Table_S7
Information on presumably fused genes in P.pacificus in comparison to C.elegans

## Sheet: Table_S7
WB_ID	ID_GF	# of fragments	PHL_Ppac_WS273	PHL_ML	PHL_Cele_WS273	Fusion Category
WBGene00112300	TRINITY_DN8775_c0_g3_i1.p1	7	28.16	95.7726	91.26	probably fused
WBGene00112300	TRINITY_DN9327_c0_g1_i1.p1	7	23.12	98.1393	96.72	probably fused
WBGene00112300	TRINITY_DN40_c0_g1_i1.p1	7	12.35	98.2027	100	probably fused
WBGene00112300	TRINITY_DN5142_c0_g1_i2.p1	7	11.77	98.0929	75.54	probably fused
WBGene00112300	TRINITY_DN1780_c0_g1_i1.p1	7	10.96	97.521	92.34	probably fused
WBGene00112300	TRINITY_DN5159_c0_g1_i1.p1	7	8.5	96.7193	62.63	probably fused
WBGene00112300	TRINITY_DN1780_c0_g1_i1.p2	7	4.18	94.0729	94.62	probably fused
WBGene00101443	TRINITY_DN10177_c0_g1_i1.p1	6	41.64	94.824	99.26	probably fused
WBGene00101443	TRINITY_DN9061_c0_g2_i2.p1	6	20.3	99.353	99.75	probably fused
WBGene00101443	TRINITY_DN5808_c0_g1_i1.p1	6	18.29	98.7475	97.95	probably fused
WBGene00101443	TRINITY_DN7328_c0_g1_i1.p1	6	9.8	88.2114	97.52	probably fused
WBGene00101443	TRINITY_DN7328_c0_g2_i1.p2	6	9.75	98.8967	97.52	probably fused
WBGene00101443	TRINITY_DN10322_c0_g1_i1.p1	6	7.59	98.365	97.52	probably fused
WBGene00117313	TRINITY_DN1676_c0_g1_i1.p1	5	33.97	97.26	42.89	probably fused
WBGene00117313	TRINITY_DN1437_c0_g1_i1.p1	5	30.21	97.8522	62.21	probably fused
WBGene00118769	TRINITY_DN2553_c0_g1_i1.p1	5	27.9	95.18	91.77	probably fused
WBGene00091851	TRINITY_DN407_c0_g1_i1.p1	5	26.17	98.7357	97.3	probably fused
WBGene00107476	TRINITY_DN5704_c0_g1_i1.p2	5	25.68	84.6565	27.29	probably fused
WBGene00098550	TRINITY_DN4028_c0_g1_i1.p1	5	24.44	97.3803	63.32	probably fused
WBGene00091851	TRINITY_DN2628_c0_g1_i1.p1	5	23.86	97.4098	87.18	probably fused
WBGene00105025	TRINITY_DN12533_c0_g2_i3.p1	5	23.27	98.3278	97.15	probably fused
WBGene00105025	TRINITY_DN3159_c0_g2_i1.p1	5	22.43	99.0647	97.56	probably fused
WBGene00107476	TRINITY_DN3355_c0_g1_i2.p1	5	21.1	98.0471	100	probably fused
WBGene00098550	TRINITY_DN6487_c0_g1_i1.p1	5	20.47	96.1952	94.2	probably fused
WBGene00098550	TRINITY_DN4310_c0_g1_i7.p1	5	19.44	97.0156	91.23	probably fused
WBGene00107476	TRINITY_DN8359_c0_g1_i2.p1	5	18.39	80.5336	15.97	probably fused
WBGene00098550	TRINITY_DN410_c0_g1_i1.p1	5	17.88	98.2242	83.29	probably fused
WBGene00118769	TRINITY_DN66_c0_g1_i2.p1	5	17.63	84.0716	72.26	probably fused
WBGene00104295	TRINITY_DN1548_c0_g5_i1.p1	5	17.28	95.8926	98.54	probably fused
WBGene00104295	TRINITY_DN1548_c0_g1_i7.p1	5	17.28	95.4315	98.09	probably fused
WBGene00104295	TRINITY_DN1548_c0_g2_i1.p1	5	16.46	97.8589	98.09	probably fused
WBGene00104295	TRINITY_DN2866_c0_g1_i1.p1	5	16.06	93.7852	98.09	probably fused
WBGene00098550	TRINITY_DN3267_c0_g1_i2.p1	5	15.87	98.4322	99.63	probably fused
WBGene00104295	TRINITY_DN1548_c0_g4_i1.p2	5	15.57	97.1177	90.29	probably fused
WBGene00107476	TRINITY_DN23508_c0_g1_i1.p1	5	14.29	98.0814	29.36	probably fused
WBGene00105025	TRINITY_DN364_c0_g3_i2.p1	5	13.39	98.7484	93.31	probably fused
WBGene00091851	TRINITY_DN8730_c0_g1_i2.p1	5	13.37	91.2438	98.01	probably fused
WBGene00091851	TRINITY_DN168_c0_g2_i4.p1	5	13.05	93.2844	88.02	probably fused
WBGene00105025	TRINITY_DN364_c0_g3_i1.p1	5	12.4	97.2336	93.31	probably fused
WBGene00107476	TRINITY_DN27425_c0_g1_i1.p1	5	11.9	92.5875	21.41	probably fused
WBGene00118769	TRINITY_DN32262_c0_g1_i1.p1	5	11.09	97.4969	98.43	probably fused
WBGene00118769	TRINITY_DN34094_c0_g1_i1.p1	5	10.33	97.4632	NA	probably fused
WBGene00118769	TRINITY_DN5789_c0_g1_i1.p1	5	10.27	90.0878	56.69	probably fused
WBGene00105025	TRINITY_DN364_c1_g3_i1.p1	5	6.77	83.5544	53.57	probably fused
WBGene00117313	TRINITY_DN4953_c0_g1_i1.p1	5	5.28	97.2459	95.79	probably fused
WBGene00117313	TRINITY_DN532_c0_g1_i4.p1	5	4.43	85.1403	NA	probably fused
WBGene00117313	TRINITY_DN4508_c0_g1_i1.p1	5	4.18	98.8863	98.16	probably fused
WBGene00091851	TRINITY_DN15792_c1_g1_i4.p1	5	4.13	84.0547	91.08	probably fused
WBGene00113266	TRINITY_DN12210_c1_g1_i1.p1.path2;Name	4	NA	NA	NA	probably fused
WBGene00114169	TRINITY_DN6269_c1_g2_i1.p1.path2;Name	4	NA	NA	NA	probably fused
WBGene00097822	TRINITY_DN8225_c0_g1_i1.p1	4	NA	92.8698	29.25	probably fused
WBGene00098563	TRINITY_DN512_c0_g3_i3.p1	4	99.57	88.2642	91.46	probably fused
WBGene00103294	TRINITY_DN3514_c0_g2_i1.p1	4	53.56	97.1713	NA	probably fused
WBGene00101410	TRINITY_DN23489_c0_g1_i1.p1	4	49.18	97.285	98.3	probably fused
WBGene00100018	TRINITY_DN8824_c0_g2_i1.p1	4	44	96.9428	98.67	probably fused
WBGene00105311	TRINITY_DN4878_c0_g3_i2.p1	4	41.45	97.9114	98.66	probably fused
WBGene00103944	TRINITY_DN254_c0_g1_i1.p1	4	38.31	91.2712	75.58	probably fused
WBGene00108820	TRINITY_DN15324_c0_g1_i4.p1	4	32.93	96.1858	98.01	probably fused
WBGene00106418	TRINITY_DN7164_c0_g2_i1.p1	4	32.69	99.0107	100	probably fused
WBGene00113200	TRINITY_DN1598_c0_g1_i2.p1	4	31.82	99.5016	99.81	probably fused
WBGene00275601	TRINITY_DN9402_c0_g2_i2.p1	4	31.01	88.4273	34.38	probably fused
WBGene00275601	TRINITY_DN25266_c0_g1_i1.p1	4	30.59	90.2073	31.65	probably fused
WBGene00108517	TRINITY_DN2953_c0_g1_i1.p1	4	29.97	99.1998	93.9	probably fused
WBGene00092888	TRINITY_DN1954_c0_g1_i5.p2	4	29.73	97.464	56.44	probably fused
WBGene00100018	TRINITY_DN14678_c0_g1_i2.p1	4	29.65	89.5805	NA	probably fused
WBGene00097822	TRINITY_DN942_c0_g1_i8.p1	4	29.55	92.1333	56.21	probably fused
WBGene00113266	TRINITY_DN5648_c0_g2_i1.p1	4	28.34	98.6016	53.02	probably fused
WBGene00113200	TRINITY_DN9040_c0_g1_i2.p1	4	28.02	99.0843	92.29	probably fused
WBGene00106418	TRINITY_DN33690_c0_g1_i1.p1	4	27.94	98.0898	100	probably fused
WBGene00106878	TRINITY_DN4660_c0_g2_i1.p1	4	27.31	98.2987	NA	probably fused
WBGene00114720	TRINITY_DN26697_c0_g1_i1.p1	4	26.72	97.7522	82.11	probably fused
WBGene00090958	TRINITY_DN7136_c0_g1_i3.p1	4	26.72	98.6781	67.16	probably fused
WBGene00115299	TRINITY_DN19449_c0_g1_i2.p1	4	26.48	84.0318	31.78	probably fused
WBGene00092888	TRINITY_DN4168_c0_g1_i1.p1	4	25.58	98.8771	47.03	probably fused
WBGene00112219	TRINITY_DN11019_c0_g1_i2.p1	4	25.43	99.0391	56.78	probably fused
WBGene00113200	TRINITY_DN3203_c2_g1_i4.p1	4	25.14	90.42	100	probably fused
WBGene00103944	TRINITY_DN25564_c0_g1_i1.p1	4	24.8	98.3816	52.32	probably fused
WBGene00105311	TRINITY_DN15665_c0_g1_i1.p1	4	24.23	98.7046	95.82	probably fused
WBGene00117732	TRINITY_DN24900_c0_g1_i1.p1	4	23.97	98.1381	99.7	probably fused
WBGene00092888	TRINITY_DN5710_c0_g1_i1.p1	4	23.77	98.6727	40.98	probably fused
WBGene00106878	TRINITY_DN23553_c0_g1_i1.p1	4	23.54	99.3265	100	probably fused
WBGene00115299	TRINITY_DN33460_c0_g1_i1.p1	4	22.94	94.7029	28.72	probably fused
WBGene00106418	TRINITY_DN1841_c0_g1_i1.p1	4	22.87	97.9771	98.73	probably fused
WBGene00092888	TRINITY_DN9403_c0_g1_i1.p1	4	22.39	98.3286	95.03	probably fused
WBGene00112219	TRINITY_DN24977_c0_g1_i1.p1	4	22.04	99.2268	95.12	probably fused
WBGene00090397	TRINITY_DN370_c1_g2_i1.p1	4	21.71	90.7465	95.59	probably fused
WBGene00108517	TRINITY_DN7723_c0_g1_i1.p1	4	21.23	99.4508	97.53	probably fused
WBGene00118008	TRINITY_DN23118_c0_g1_i1.p1	4	21.11	95.7933	26.76	probably fused
WBGene00114169	TRINITY_DN1572_c0_g3_i1.p1	4	20.78	82.0617	100	probably fused
WBGene00114720	TRINITY_DN5241_c0_g1_i1.p1	4	19.16	99.251	88.42	probably fused
WBGene00115299	TRINITY_DN15153_c0_g1_i1.p1	4	19.03	91.3568	23.08	probably fused
WBGene00108820	TRINITY_DN5901_c0_g1_i1.p2	4	18.58	92.6536	95.65	probably fused
WBGene00117732	TRINITY_DN4977_c0_g1_i1.p1	4	18.4	93.1517	94.96	probably fused
WBGene00113266	TRINITY_DN2561_c1_g1_i2.p1	4	18.06	99.3638	75.81	probably fused
WBGene00113266	TRINITY_DN5648_c0_g2_i1.p2	4	18.01	97.931	NA	probably fused
WBGene00103294	TRINITY_DN6357_c0_g1_i1.p1	4	17.81	98.1097	98.51	probably fused
WBGene00117732	TRINITY_DN1808_c0_g1_i1.p1	4	17.69	98.4113	30.37	probably fused
WBGene00105311	TRINITY_DN1963_c0_g1_i1.p1	4	17.68	98.5953	NA	probably fused
WBGene00115299	TRINITY_DN9303_c0_g2_i2.p1	4	17.61	81.8887	16.36	probably fused
WBGene00090397	TRINITY_DN5394_c0_g2_i2.p1	4	16.64	92.9732	74.4	probably fused
WBGene00106878	TRINITY_DN15948_c0_g1_i1.p1	4	16.64	94.1902	63.78	probably fused
WBGene00105311	TRINITY_DN11640_c0_g1_i1.p1	4	15.84	83.7549	92.96	probably fused
WBGene00106418	TRINITY_DN29653_c0_g1_i1.p1	4	15.81	99.6692	75.71	probably fused
WBGene00113200	TRINITY_DN10016_c0_g1_i1.p1	4	15.73	98.0939	99.53	probably fused
WBGene00114720	TRINITY_DN5134_c0_g1_i1.p1	4	15.45	99.1091	93.81	probably fused
WBGene00114169	TRINITY_DN310_c0_g1_i2.p1	4	15.45	86.0649	80.39	probably fused
WBGene00114720	TRINITY_DN3051_c0_g1_i1.p1	4	15.37	99.4128	87.53	probably fused
WBGene00114169	TRINITY_DN3844_c0_g1_i1.p1	4	14.84	81.9033	NA	probably fused
WBGene00275601	TRINITY_DN9402_c0_g1_i1.p1	4	14.56	96.8929	13.69	probably fused
WBGene00097822	TRINITY_DN942_c0_g1_i5.p1	4	14.2	93.4827	10.17	probably fused
WBGene00103944	TRINITY_DN11856_c0_g1_i1.p1	4	14.19	94.6807	22.62	probably fused
WBGene00090958	TRINITY_DN27573_c0_g1_i1.p1	4	13.73	99.2143	NA	probably fused
WBGene00101410	TRINITY_DN6198_c0_g1_i1.p1	4	13.73	98.1455	93.53	probably fused
WBGene00101410	TRINITY_DN7481_c0_g1_i2.p1	4	13.73	94.9541	92.57	probably fused
WBGene00090958	TRINITY_DN7136_c0_g2_i1.p1	4	13.73	94.2818	26.78	probably fused
WBGene00112219	TRINITY_DN84_c0_g1_i2.p1	4	13.61	97.381	74.32	probably fused
WBGene00098563	TRINITY_DN847_c0_g1_i1.p1	4	13.47	93.6277	93.22	probably fused
WBGene00106878	TRINITY_DN28962_c0_g1_i1.p1	4	12.68	97.5084	78.61	probably fused
WBGene00275601	TRINITY_DN23387_c0_g1_i1.p2	4	12.46	82.2836	11.01	probably fused
WBGene00090397	TRINITY_DN25048_c0_g1_i1.p1	4	12.44	94.011	99.41	probably fused
WBGene00112219	TRINITY_DN1168_c0_g2_i1.p1	4	11.96	98.4611	93.84	probably fused
WBGene00118008	TRINITY_DN27201_c0_g1_i1.p1	4	11.95	87.8054	9.42	probably fused
WBGene00103944	TRINITY_DN17750_c0_g1_i1.p1	4	11.76	81.133	18.97	probably fused
WBGene00117732	TRINITY_DN3574_c0_g1_i1.p1	4	11.34	95.7333	73.73	probably fused
WBGene00100018	TRINITY_DN3984_c0_g1_i2.p1	4	11.06	91.4709	97.32	probably fused
WBGene00103294	TRINITY_DN5679_c0_g1_i1.p1	4	10.95	81.4961	76	probably fused
WBGene00108820	TRINITY_DN6911_c0_g1_i1.p1	4	10.59	93.7037	97.67	probably fused
WBGene00108517	TRINITY_DN6250_c0_g1_i1.p1	4	10.49	98.4318	NA	probably fused
WBGene00098563	TRINITY_DN1275_c0_g1_i6.p1	4	9.95	96.292	98.58	probably fused
WBGene00103294	TRINITY_DN2149_c0_g1_i1.p1	4	9.95	91.9887	96.38	probably fused
WBGene00090397	TRINITY_DN14675_c0_g1_i1.p1	4	7.84	98.5746	95.39	probably fused
WBGene00108517	TRINITY_DN1607_c0_g1_i1.p1	4	7.71	92.8219	NA	probably fused
WBGene00108820	TRINITY_DN6314_c0_g1_i1.p1	4	7.5	94.8002	95.6	probably fused
WBGene00118008	TRINITY_DN10246_c0_g4_i1.p1	4	7.21	89.6037	NA	probably fused
WBGene00097822	TRINITY_DN14467_c0_g5_i1.p1	4	7.16	96.0769	6.36	probably fused
WBGene00118008	TRINITY_DN14053_c0_g1_i2.p1	4	7.1	92.5487	7.21	probably fused
WBGene00101410	TRINITY_DN1003_c0_g1_i4.p1	4	6.56	95.7512	72.28	probably fused
WBGene00098563	TRINITY_DN3900_c0_g1_i2.p1	4	5.28	92.1113	100	probably fused
WBGene00090958	TRINITY_DN14822_c0_g1_i1.p1	4	5.25	87.9413	NA	probably fused
WBGene00100018	TRINITY_DN29514_c0_g1_i1.p1	4	3.24	98.3197	NA	probably fused
WBGene00094280	TRINITY_DN1788_c0_g1_i7.p1.path2;Name	3	NA	NA	NA	probably fused
WBGene00094388	TRINITY_DN842_c0_g5_i2.p1.path2;Name	3	NA	NA	NA	probably fused
WBGene00107248	TRINITY_DN27477_c0_g1_i1.p1.path2;Name	3	NA	NA	NA	probably fused
WBGene00095263	TRINITY_DN33762_c0_g1_i1.p1	3	100	95.627	9.25	probably fused
WBGene00107117	TRINITY_DN4784_c0_g1_i1.p1	3	99.05	88.849	98.17	probably fused
WBGene00109083	TRINITY_DN11165_c0_g1_i1.p1	3	92.03	96.3063	99.58	probably fused
WBGene00273763	TRINITY_DN4374_c0_g2_i1.p2	3	91.41	85.3726	53.85	probably fused
WBGene00098666	TRINITY_DN6492_c1_g1_i1.p1	3	76.16	97.1634	97.86	probably fused
WBGene00202874	TRINITY_DN14949_c0_g1_i1.p1	3	71.05	98.9748	99.6	probably fused
WBGene00099233	TRINITY_DN846_c0_g1_i1.p1	3	69.17	98.7047	76.25	probably fused
WBGene00284812	TRINITY_DN12030_c0_g1_i1.p1	3	68.15	99.3676	99.07	probably fused
WBGene00272395	TRINITY_DN169_c0_g2_i3.p1	3	64.42	95.5735	95.53	probably fused
WBGene00118753	TRINITY_DN24802_c0_g1_i1.p1	3	64.17	96.7209	99.34	probably fused
WBGene00101375	TRINITY_DN753_c0_g1_i2.p1	3	63.03	94.7811	97.24	probably fused
WBGene00096327	TRINITY_DN11018_c0_g1_i1.p1	3	62.62	95.9373	94.23	probably fused
WBGene00104705	TRINITY_DN3694_c0_g1_i2.p1	3	62.58	99.2901	99.59	probably fused
WBGene00273763	TRINITY_DN4374_c0_g5_i1.p1	3	62.16	94.7105	58.41	probably fused
WBGene00107364	TRINITY_DN31129_c0_g1_i1.p1	3	62.03	99.2933	99.06	probably fused
WBGene00107248	TRINITY_DN122_c0_g1_i2.p1	3	59.4	94.9796	NA	probably fused
WBGene00090004	TRINITY_DN16866_c0_g1_i1.p1	3	58.86	96.7595	31.78	probably fused
WBGene00107713	TRINITY_DN4721_c0_g1_i4.p1	3	58.57	98.3146	95.56	probably fused
WBGene00103894	TRINITY_DN7240_c0_g1_i1.p1	3	57.92	99.2566	83.81	probably fused
WBGene00115912	TRINITY_DN24426_c0_g1_i1.p1	3	57.59	98.8271	99.37	probably fused
WBGene00091791	TRINITY_DN6643_c0_g1_i1.p1	3	57	98.0279	98.8	probably fused
WBGene00097499	TRINITY_DN6075_c0_g1_i1.p1	3	56.64	96.1563	100	probably fused
WBGene00114475	TRINITY_DN9983_c0_g1_i1.p1	3	56.29	99.0373	78.86	probably fused
WBGene00112201	TRINITY_DN6504_c0_g1_i2.p1	3	55.93	91.6482	99.65	probably fused
WBGene00204665	TRINITY_DN1627_c0_g4_i1.p1	3	52.06	98.0522	97.16	probably fused
WBGene00113149	TRINITY_DN88_c0_g1_i2.p1	3	51.81	92.9569	94.81	probably fused
WBGene00112170	TRINITY_DN31246_c0_g1_i1.p1	3	50.1	98.847	80.98	probably fused
WBGene00099445	TRINITY_DN4211_c0_g1_i1.p1	3	49.67	99.6481	84.1	probably fused
WBGene00104138	TRINITY_DN7405_c0_g1_i7.p1	3	49.65	86.0915	99.16	probably fused
WBGene00109759	TRINITY_DN2688_c0_g1_i2.p1	3	49.62	98.3767	86.88	probably fused
WBGene00107441	TRINITY_DN33955_c0_g1_i1.p1	3	49.32	98.4165	98.71	probably fused
WBGene00115036	TRINITY_DN3837_c0_g3_i9.p1	3	49.08	90.173	80.98	probably fused
WBGene00090078	TRINITY_DN4192_c0_g1_i1.p1	3	49.05	89.4655	97.19	probably fused
WBGene00106864	TRINITY_DN4127_c0_g1_i1.p1	3	49.03	97.7653	95.58	probably fused
WBGene00090078	TRINITY_DN5217_c0_g3_i1.p1	3	47.92	95.7771	96.28	probably fused
WBGene00206179	TRINITY_DN3495_c0_g2_i2.p1	3	47.51	96.581	80.8	probably fused
WBGene00113525	TRINITY_DN10286_c0_g1_i3.p1	3	47.25	97.8438	97.97	probably fused
WBGene00101686	TRINITY_DN31203_c0_g1_i1.p1	3	47.06	97.5107	100	probably fused
WBGene00106436	TRINITY_DN3593_c0_g1_i1.p1	3	46.96	94.8926	87.05	probably fused
WBGene00097813	TRINITY_DN13705_c0_g1_i1.p1	3	46.9	94.4694	87.58	probably fused
WBGene00090229	TRINITY_DN4494_c0_g1_i2.p1	3	46.61	95.7947	33.67	probably fused
WBGene00100767	TRINITY_DN3398_c0_g2_i1.p1	3	46.52	97.5069	97.91	probably fused
WBGene00107117	TRINITY_DN28926_c0_g1_i1.p1	3	46.49	93.7389	NA	probably fused
WBGene00116004	TRINITY_DN7120_c0_g2_i1.p1	3	45.39	97.1063	87.1	probably fused
WBGene00098817	TRINITY_DN4959_c0_g1_i1.p1	3	45.12	96.7635	96.75	probably fused
WBGene00276305	TRINITY_DN6103_c0_g2_i7.p1	3	45.09	80.9836	45.79	probably fused
WBGene00104913	TRINITY_DN2672_c0_g2_i1.p1	3	44.93	98.8528	48.78	probably fused
WBGene00092732	TRINITY_DN1355_c0_g1_i5.p1	3	44.87	95.4415	96.09	probably fused
WBGene00114669	TRINITY_DN696_c0_g1_i1.p1	3	44.69	89.2819	99.7	probably fused
WBGene00097792	TRINITY_DN6935_c0_g2_i1.p1	3	44.36	98.4444	16.16	probably fused
WBGene00112337	TRINITY_DN1490_c0_g2_i2.p1	3	44.33	98.1241	97.77	probably fused
WBGene00101452	TRINITY_DN1999_c0_g1_i2.p1	3	44.18	98.1263	99.28	probably fused
WBGene00114683	TRINITY_DN9886_c0_g1_i1.p1	3	43.42	99.3137	NA	probably fused
WBGene00116876	TRINITY_DN31504_c0_g1_i1.p1	3	42.91	97.8943	17.73	probably fused
WBGene00096130	TRINITY_DN31494_c0_g1_i1.p1	3	42.79	99.3022	94	probably fused
WBGene00109284	TRINITY_DN3511_c0_g1_i1.p1	3	42.75	99.075	100	probably fused
WBGene00091280	TRINITY_DN6222_c0_g1_i1.p1	3	42.61	94.3695	82.48	probably fused
WBGene00106943	TRINITY_DN3394_c0_g1_i1.p1	3	41.89	99.3587	88.57	probably fused
WBGene00103512	TRINITY_DN2990_c0_g1_i1.p1	3	41.88	98.0966	95.64	probably fused
WBGene00112157	TRINITY_DN145_c0_g2_i2.p1	3	40.64	96.124	98.8	probably fused
WBGene00096130	TRINITY_DN26742_c0_g1_i1.p1	3	40.45	99.23	97.02	probably fused
WBGene00104913	TRINITY_DN5458_c0_g1_i1.p1	3	40.28	97.8745	94.88	probably fused
WBGene00093800	TRINITY_DN2861_c0_g1_i2.p1	3	39.52	96.0233	NA	probably fused
WBGene00104852	TRINITY_DN30202_c0_g1_i1.p1	3	39.5	96.5378	36.7	probably fused
WBGene00275401	TRINITY_DN6220_c0_g1_i1.p1	3	39.47	96.6535	56.32	probably fused
WBGene00101452	TRINITY_DN17322_c0_g3_i3.p1	3	39.06	98.7981	67.55	probably fused
WBGene00112659	TRINITY_DN20669_c0_g1_i1.p1	3	39.02	94.9806	25.55	probably fused
WBGene00103512	TRINITY_DN2055_c0_g1_i1.p1	3	38.33	98.2082	98.82	probably fused
WBGene00112368	TRINITY_DN5607_c0_g1_i1.p1	3	38.25	98.7651	95.73	probably fused
WBGene00115723	TRINITY_DN3520_c0_g1_i1.p1	3	38.14	98.3363	93.38	probably fused
WBGene00114843	TRINITY_DN459_c0_g1_i2.p1	3	38.11	95.5431	99.38	probably fused
WBGene00112170	TRINITY_DN33617_c0_g1_i1.p1	3	37.83	99.3455	100	probably fused
WBGene00114796	TRINITY_DN4733_c0_g1_i1.p1	3	37.82	99.26	98.66	probably fused
WBGene00107495	TRINITY_DN7505_c0_g1_i1.p1	3	37.65	98.3365	34.99	probably fused
WBGene00101515	TRINITY_DN455_c0_g2_i2.p1	3	37.62	91.0196	99.51	probably fused
WBGene00107495	TRINITY_DN15064_c0_g2_i1.p1	3	37.29	96.6548	NA	probably fused
WBGene00102073	TRINITY_DN33612_c0_g1_i1.p1	3	37.12	99.0062	94.61	probably fused
WBGene00093171	TRINITY_DN4981_c0_g1_i1.p1	3	36.87	97.2135	88.08	probably fused
WBGene00278863	TRINITY_DN32041_c0_g1_i1.p1	3	36.85	98.8313	NA	probably fused
WBGene00106864	TRINITY_DN5770_c0_g1_i2.p1	3	36.75	98.4825	89.31	probably fused
WBGene00093171	TRINITY_DN11866_c0_g1_i1.p1	3	36.52	97.3531	93.83	probably fused
WBGene00098817	TRINITY_DN6533_c0_g1_i1.p1	3	36.29	98.4946	67.63	probably fused
WBGene00279783	TRINITY_DN442_c0_g3_i3.p1	3	36.24	88.8792	14.4	probably fused
WBGene00091280	TRINITY_DN184_c0_g1_i1.p1	3	36.19	96.3494	96.37	probably fused
WBGene00106943	TRINITY_DN3737_c0_g1_i1.p1	3	35.8	97.9437	97.43	probably fused
WBGene00115229	TRINITY_DN101_c0_g1_i9.p1	3	35.52	92.9496	84.91	probably fused
WBGene00098085	TRINITY_DN4562_c0_g1_i1.p1	3	34.63	95.7048	92.21	probably fused
WBGene00115118	TRINITY_DN4627_c0_g1_i1.p1	3	34.55	83.0367	79.65	probably fused
WBGene00278863	TRINITY_DN32479_c0_g1_i1.p1	3	34.44	96.7136	NA	probably fused
WBGene00279783	TRINITY_DN21346_c0_g1_i2.p1	3	33.85	98.7472	11.68	probably fused
WBGene00115723	TRINITY_DN1134_c0_g1_i2.p1	3	33.79	91.0894	99.14	probably fused
WBGene00092670	TRINITY_DN77_c0_g2_i1.p1	3	33.57	97.8295	97.22	probably fused
WBGene00115229	TRINITY_DN30_c0_g1_i5.p1	3	33.45	94.0431	87.31	probably fused
WBGene00091221	TRINITY_DN1244_c0_g1_i1.p1	3	33.39	86.2498	37.58	probably fused
WBGene00115118	TRINITY_DN3345_c0_g1_i1.p1	3	33.37	97.7503	98.72	probably fused
WBGene00116583	TRINITY_DN2414_c0_g1_i1.p1	3	33.33	99.0145	NA	probably fused
WBGene00109759	TRINITY_DN31181_c0_g1_i1.p1	3	33.31	99.4776	NA	probably fused
WBGene00100540	TRINITY_DN2464_c0_g2_i1.p1	3	33.07	98.471	97.64	probably fused
WBGene00104852	TRINITY_DN2468_c0_g1_i3.p1	3	32.97	98.6835	72.42	probably fused
WBGene00102073	TRINITY_DN2784_c0_g1_i1.p1	3	32.84	96.5726	91.58	probably fused
WBGene00114843	TRINITY_DN9471_c0_g2_i1.p1	3	32.76	98.7752	98.95	probably fused
WBGene00092670	TRINITY_DN77_c0_g1_i1.p1	3	32.67	97.4829	97.22	probably fused
WBGene00092670	TRINITY_DN77_c0_g1_i8.p1	3	32.48	98.6185	98.01	probably fused
WBGene00100540	TRINITY_DN3392_c0_g1_i1.p1	3	32.38	82.9865	96.93	probably fused
WBGene00098223	TRINITY_DN33714_c0_g1_i1.p2	3	32.3	98.7568	57.67	probably fused
WBGene00109284	TRINITY_DN2666_c0_g2_i2.p1	3	32.16	96.2878	97.62	probably fused
WBGene00115229	TRINITY_DN5854_c0_g1_i3.p1	3	31.88	97.7148	96.77	probably fused
WBGene00095263	TRINITY_DN589_c0_g2_i1.p1	3	31.86	94.7402	4.19	probably fused
WBGene00093800	TRINITY_DN6422_c0_g1_i1.p1	3	31.6	96.7249	100	probably fused
WBGene00099242	TRINITY_DN17051_c0_g1_i1.p1	3	31.51	98.94	74.63	probably fused
WBGene00114796	TRINITY_DN207_c1_g1_i1.p1	3	31.44	98.2946	85.61	probably fused
WBGene00099445	TRINITY_DN5779_c0_g1_i1.p1	3	31.4	96.1148	98.95	probably fused
WBGene00116004	TRINITY_DN4659_c0_g1_i1.p1	3	30.79	98.2377	99.74	probably fused
WBGene00278863	TRINITY_DN27601_c0_g1_i1.p1	3	30.74	97.7265	NA	probably fused
WBGene00204665	TRINITY_DN6042_c0_g1_i1.p1	3	30.67	88.1916	77.52	probably fused
WBGene00112157	TRINITY_DN145_c0_g1_i1.p1	3	30.48	97.3884	66.99	probably fused
WBGene00107441	TRINITY_DN13312_c0_g1_i1.p1	3	30.36	94.2914	94.91	probably fused
WBGene00098732	TRINITY_DN571_c0_g2_i1.p1	3	30.28	98.2573	95.55	probably fused
WBGene00104617	TRINITY_DN34117_c0_g1_i1.p1	3	30.09	96.1237	NA	probably fused
WBGene00093448	TRINITY_DN4239_c0_g1_i1.p1	3	30.09	93.7675	79.58	probably fused
WBGene00111366	TRINITY_DN3247_c0_g1_i1.p1	3	29.98	98.4639	89.98	probably fused
WBGene00114683	TRINITY_DN2537_c0_g1_i1.p1	3	29.72	94.7654	100	probably fused
WBGene00100837	TRINITY_DN31653_c0_g1_i1.p1	3	29.64	98.6425	99.45	probably fused
WBGene00102073	TRINITY_DN1547_c0_g1_i1.p1	3	29.64	96.2223	87.83	probably fused
WBGene00115116	TRINITY_DN16210_c0_g1_i1.p1	3	29.61	96.5031	55.53	probably fused
WBGene00115036	TRINITY_DN5361_c0_g1_i2.p1	3	29.6	99.0751	87.56	probably fused
WBGene00098732	TRINITY_DN210_c0_g2_i1.p1	3	29.57	99.0812	97.92	probably fused
WBGene00090895	TRINITY_DN385_c0_g1_i1.p1	3	29.36	98.2062	100	probably fused
WBGene00112157	TRINITY_DN1871_c0_g1_i1.p1	3	29.18	99.3841	95.96	probably fused
WBGene00114843	TRINITY_DN3146_c0_g1_i2.p1	3	29.12	93.5333	97.59	probably fused
WBGene00116583	TRINITY_DN2414_c0_g2_i1.p2	3	28.85	96.7147	NA	probably fused
WBGene00114675	TRINITY_DN2701_c0_g2_i1.p1	3	28.66	87.7809	NA	probably fused
WBGene00304636	TRINITY_DN25335_c0_g1_i1.p1	3	28.54	87.5097	21.38	probably fused
WBGene00112659	TRINITY_DN29013_c0_g1_i1.p1	3	28.52	92.6701	16.08	probably fused
WBGene00112368	TRINITY_DN1709_c0_g1_i1.p1	3	28.3	97.001	94.48	probably fused
WBGene00098732	TRINITY_DN11470_c0_g1_i1.p1	3	28.24	90.0469	76.15	probably fused
WBGene00104852	TRINITY_DN2370_c0_g3_i2.p1	3	28.2	89.5889	32.77	probably fused
WBGene00116583	TRINITY_DN29058_c0_g1_i1.p1	3	28.14	98.2381	NA	probably fused
WBGene00118178	TRINITY_DN33878_c0_g1_i1.p1	3	27.75	99.6476	100	probably fused
WBGene00109284	TRINITY_DN4169_c0_g1_i1.p1	3	27.65	89.8772	98.01	probably fused
WBGene00098223	TRINITY_DN20445_c0_g1_i1.p1	3	27.55	93.6507	63.47	probably fused
WBGene00114675	TRINITY_DN8835_c0_g2_i1.p1	3	27.26	90.3667	50.52	probably fused
WBGene00114669	TRINITY_DN4912_c0_g2_i1.p1	3	27.15	94.3596	80.12	probably fused
WBGene00090895	TRINITY_DN25457_c0_g1_i1.p1	3	26.9	95.7315	99.24	probably fused
WBGene00106436	TRINITY_DN128_c0_g1_i1.p1	3	26.79	98.4077	98.56	probably fused
WBGene00106436	TRINITY_DN31670_c0_g1_i1.p1	3	26.79	99.2003	86.64	probably fused
WBGene00275401	TRINITY_DN3020_c0_g1_i1.p1	3	26.71	95.3459	98.83	probably fused
WBGene00104617	TRINITY_DN28935_c0_g1_i1.p1	3	26.7	94.3924	NA	probably fused
WBGene00098085	TRINITY_DN4286_c0_g1_i1.p1	3	26.7	98.9556	99.82	probably fused
WBGene00114801	TRINITY_DN4047_c0_g1_i3.p1	3	26.66	99.2961	91.47	probably fused
WBGene00304636	TRINITY_DN23792_c0_g1_i1.p1	3	26.62	84.2958	NA	probably fused
WBGene00097499	TRINITY_DN6074_c0_g1_i1.p1	3	26.55	96.6471	NA	probably fused
WBGene00093171	TRINITY_DN4137_c0_g1_i1.p1	3	26.54	97.7521	55.87	probably fused
WBGene00089891	TRINITY_DN1681_c0_g1_i1.p1	3	26.51	96.941	87.54	probably fused
WBGene00276994	TRINITY_DN1679_c1_g1_i1.p1	3	26.45	93.8808	85.37	probably fused
WBGene00276994	TRINITY_DN8842_c0_g1_i3.p1	3	26.36	98.4573	73.71	probably fused
WBGene00089891	TRINITY_DN4625_c0_g5_i1.p1	3	26.34	97.8456	NA	probably fused
WBGene00090382	TRINITY_DN14212_c1_g1_i1.p1	3	26.28	97.8358	20.55	probably fused
WBGene00106316	TRINITY_DN1823_c0_g1_i1.p1	3	26.24	93.3581	98.3	probably fused
WBGene00100767	TRINITY_DN2104_c0_g1_i1.p1	3	26.21	96.1622	NA	probably fused
WBGene00098223	TRINITY_DN13541_c0_g1_i2.p1	3	26.19	88.0239	96.94	probably fused
WBGene00114475	TRINITY_DN3333_c0_g1_i1.p1	3	25.96	91.3403	71.86	probably fused
WBGene00276305	TRINITY_DN6103_c0_g1_i1.p1	3	25.78	94.7326	25.67	probably fused
WBGene00090895	TRINITY_DN31353_c0_g1_i1.p1	3	25.46	97.7476	100	probably fused
WBGene00118178	TRINITY_DN2456_c0_g1_i1.p1	3	25.42	98.9753	91.15	probably fused
WBGene00104138	TRINITY_DN10694_c0_g1_i1.p1	3	25.13	98.2618	93.6	probably fused
WBGene00105075	TRINITY_DN14430_c0_g2_i2.p1	3	25.07	92.9526	25.85	probably fused
WBGene00092356	TRINITY_DN918_c0_g1_i1.p1	3	24.68	96.3996	99.27	probably fused
WBGene00112337	TRINITY_DN31569_c0_g1_i1.p1	3	24.51	98.5232	99.24	probably fused
WBGene00104617	TRINITY_DN9429_c0_g1_i2.p2	3	24.34	97.9759	NA	probably fused
WBGene00113149	TRINITY_DN31164_c0_g1_i1.p1	3	24.19	99.294	87.01	probably fused
WBGene00109427	TRINITY_DN33521_c0_g1_i1.p1	3	23.94	98.8816	96.64	probably fused
WBGene00115118	TRINITY_DN34026_c0_g1_i1.p1	3	23.9	99.1165	79.77	probably fused
WBGene00114801	TRINITY_DN625_c0_g1_i4.p1	3	23.75	98.2815	92.93	probably fused
WBGene00272395	TRINITY_DN4492_c0_g1_i3.p1	3	23.49	97.6792	97.35	probably fused
WBGene00112368	TRINITY_DN27742_c0_g1_i1.p1	3	23.23	97.5473	96.42	probably fused
WBGene00112659	TRINITY_DN560_c0_g1_i1.p2	3	23.11	84.9232	21.59	probably fused
WBGene00114675	TRINITY_DN8835_c0_g3_i1.p1	3	22.87	80.9885	19.47	probably fused
WBGene00115723	TRINITY_DN1213_c0_g1_i2.p1	3	22.84	82.0832	79.89	probably fused
WBGene00091791	TRINITY_DN33975_c0_g1_i1.p1	3	22.68	99.097	99.15	probably fused
WBGene00277480	TRINITY_DN2713_c0_g4_i1.p1	3	22.61	98.7652	100	probably fused
WBGene00277480	TRINITY_DN2713_c0_g5_i1.p1	3	22.43	98.5925	97.19	probably fused
WBGene00095954	TRINITY_DN1367_c0_g1_i3.p1	3	22.43	97.8038	24.08	probably fused
WBGene00277480	TRINITY_DN2713_c0_g1_i1.p1	3	22.26	98.4598	95.69	probably fused
WBGene00090382	TRINITY_DN14359_c0_g2_i2.p1	3	22.26	89.887	39.05	probably fused
WBGene00089891	TRINITY_DN29346_c0_g1_i1.p1	3	22.21	95.6636	NA	probably fused
WBGene00104138	TRINITY_DN4715_c0_g1_i3.p1	3	22.11	98.192	99.21	probably fused
WBGene00114683	TRINITY_DN7544_c0_g1_i1.p1	3	22.08	93.3537	98.58	probably fused
WBGene00116876	TRINITY_DN33895_c0_g1_i1.p1	3	21.88	98.7324	99.4	probably fused
WBGene00109427	TRINITY_DN2923_c0_g1_i3.p3	3	21.76	85.0585	35.96	probably fused
WBGene00118178	TRINITY_DN8323_c0_g1_i1.p1	3	21.75	98.4103	92.97	probably fused
WBGene00090004	TRINITY_DN16866_c0_g3_i1.p1	3	21.71	98.5157	24.14	probably fused
WBGene00105075	TRINITY_DN14430_c0_g1_i1.p1	3	21.6	98.8627	23.01	probably fused
WBGene00105075	TRINITY_DN14430_c0_g3_i1.p1	3	21.39	99.0123	16.77	probably fused
WBGene00096769	TRINITY_DN1263_c0_g1_i6.p1	3	21.28	92.2128	85.23	probably fused
WBGene00091280	TRINITY_DN10058_c0_g1_i1.p1	3	21.2	95.3154	100	probably fused
WBGene00101686	TRINITY_DN29264_c0_g1_i1.p1	3	20.93	89.2033	41.31	probably fused
WBGene00107495	TRINITY_DN29056_c0_g1_i1.p1	3	20.9	90.17	22.68	probably fused
WBGene00107441	TRINITY_DN6239_c0_g1_i1.p1	3	20.85	95.4008	90.68	probably fused
WBGene00206179	TRINITY_DN4817_c0_g1_i1.p1	3	20.54	98.6566	98.25	probably fused
WBGene00091791	TRINITY_DN29195_c0_g1_i1.p1	3	20.45	99.3908	NA	probably fused
WBGene00106943	TRINITY_DN3617_c0_g1_i1.p1	3	20.45	98.5778	98.71	probably fused
WBGene00115912	TRINITY_DN29_c0_g1_i1.p1	3	20.06	99.0494	18.27	probably fused
WBGene00094280	TRINITY_DN6759_c0_g2_i1.p1	3	19.99	91.2026	20.16	probably fused
WBGene00273763	TRINITY_DN4374_c0_g3_i1.p1	3	19.73	88.5469	NA	probably fused
WBGene00113149	TRINITY_DN6344_c0_g2_i1.p1	3	19.71	99.2594	94.67	probably fused
WBGene00114801	TRINITY_DN4186_c0_g1_i1.p1	3	19.69	98.652	95.97	probably fused
WBGene00089779	TRINITY_DN3766_c0_g4_i1.p1	3	19.67	95.9835	7.68	probably fused
WBGene00103894	TRINITY_DN7412_c0_g1_i1.p1	3	19.62	97.2884	100	probably fused
WBGene00089779	TRINITY_DN26063_c0_g1_i1.p2	3	19.49	98.9788	NA	probably fused
WBGene00111366	TRINITY_DN2072_c0_g1_i2.p1	3	19.49	98.3931	90.09	probably fused
WBGene00097792	TRINITY_DN11614_c0_g1_i1.p1	3	19.44	99.5384	98.01	probably fused
WBGene00107713	TRINITY_DN1008_c0_g1_i1.p1	3	19.36	87.4234	64.42	probably fused
WBGene00106316	TRINITY_DN13365_c0_g1_i3.p1	3	19.13	83.3779	91.4	probably fused
WBGene00111366	TRINITY_DN3825_c0_g1_i1.p1	3	18.85	99.463	NA	probably fused
WBGene00089779	TRINITY_DN15980_c0_g1_i1.p1	3	18.83	89.3516	NA	probably fused
WBGene00304636	TRINITY_DN30148_c0_g1_i1.p1	3	18.71	89.5921	NA	probably fused
WBGene00098817	TRINITY_DN5363_c0_g1_i2.p1	3	18.64	99.3447	100	probably fused
WBGene00090382	TRINITY_DN24465_c0_g1_i1.p1	3	18.64	98.0093	25.38	probably fused
WBGene00112201	TRINITY_DN775_c0_g1_i2.p1	3	18.58	98.5031	50	probably fused
WBGene00116352	TRINITY_DN17681_c0_g1_i1.p1	3	18.53	98.7877	NA	probably fused
WBGene00103512	TRINITY_DN6308_c0_g1_i1.p1	3	18.44	97.9073	98.83	probably fused
WBGene00091221	TRINITY_DN6497_c0_g3_i1.p1	3	18.38	86.5424	18.94	probably fused
WBGene00114475	TRINITY_DN10048_c0_g1_i1.p1	3	18.36	95.9624	94.17	probably fused
WBGene00103894	TRINITY_DN6706_c0_g1_i1.p1	3	18.3	88.7701	98.08	probably fused
WBGene00093800	TRINITY_DN9237_c0_g1_i1.p1	3	18.11	97.9169	98.15	probably fused
WBGene00107364	TRINITY_DN4576_c0_g1_i1.p1	3	18.01	97.7562	92.2	probably fused
WBGene00106316	TRINITY_DN568_c0_g1_i11.p1	3	17.81	86.1852	92.36	probably fused
WBGene00092209	TRINITY_DN22016_c0_g1_i1.p1	3	17.75	98.0254	68.47	probably fused
WBGene00114669	TRINITY_DN1054_c0_g1_i3.p1	3	17.66	86.977	31	probably fused
WBGene00284812	TRINITY_DN2889_c0_g1_i1.p1	3	17.44	99.6065	99.49	probably fused
WBGene00116352	TRINITY_DN2417_c0_g1_i2.p1	3	17.23	97.32	NA	probably fused
WBGene00100540	TRINITY_DN1964_c0_g1_i2.p1	3	17.16	80.8259	56.07	probably fused
WBGene00096130	TRINITY_DN5204_c0_g1_i1.p1	3	17	99.4994	86.21	probably fused
WBGene00101452	TRINITY_DN1191_c0_g1_i1.p1	3	16.95	98.1279	91.73	probably fused
WBGene00092732	TRINITY_DN27128_c0_g1_i1.p1	3	16.86	99.4155	100	probably fused
WBGene00104705	TRINITY_DN2373_c0_g1_i1.p1	3	16.79	94.5132	93.7	probably fused
WBGene00099233	TRINITY_DN34791_c0_g1_i1.p1	3	16.67	98.4867	97.63	probably fused
WBGene00095263	TRINITY_DN2518_c0_g1_i1.p1	3	16.65	93.4383	93.62	probably fused
WBGene00090004	TRINITY_DN16866_c0_g2_i1.p1	3	16.62	96.4166	7.98	probably fused
WBGene00109427	TRINITY_DN34517_c0_g1_i1.p1	3	16.44	98.9816	99.71	probably fused
WBGene00115116	TRINITY_DN29015_c0_g1_i1.p1	3	16.11	92.1965	99.35	probably fused
WBGene00112201	TRINITY_DN6149_c0_g1_i1.p1	3	16.1	98.3999	98.53	probably fused
WBGene00116352	TRINITY_DN1663_c0_g1_i1.p1	3	15.97	96.8477	NA	probably fused
WBGene00112337	TRINITY_DN7267_c0_g2_i1.p1	3	15.96	99.4822	86.97	probably fused
WBGene00097813	TRINITY_DN20087_c0_g1_i2.p2	3	15.81	88.4099	56.27	probably fused
WBGene00107248	TRINITY_DN27477_c0_g1_i1.p1	3	15.32	85.6449	NA	probably fused
WBGene00097792	TRINITY_DN2830_c0_g1_i1.p1	3	15.26	99.2261	98.69	probably fused
WBGene00115912	TRINITY_DN4341_c0_g1_i1.p1	3	15.18	98.0512	96.19	probably fused
WBGene00101686	TRINITY_DN2233_c0_g9_i1.p1	3	15.15	87.4866	NA	probably fused
WBGene00109759	TRINITY_DN15267_c0_g1_i1.p1	3	15.06	98.5788	95.58	probably fused
WBGene00104913	TRINITY_DN5101_c0_g1_i1.p1	3	15.01	99.2714	95.02	probably fused
WBGene00100767	TRINITY_DN5096_c0_g1_i1.p1	3	14.98	93.7382	98.08	probably fused
WBGene00093448	TRINITY_DN39_c0_g1_i1.p1	3	14.86	85.0611	94.2	probably fused
WBGene00107364	TRINITY_DN27076_c0_g1_i1.p1	3	14.7	97.0746	100	probably fused
WBGene00091933	TRINITY_DN3570_c0_g1_i3.p1	3	14.59	98.1491	96.44	probably fused
WBGene00284812	TRINITY_DN5448_c0_g1_i1.p1	3	14.5	90.3952	98.75	probably fused
WBGene00116004	TRINITY_DN2934_c0_g1_i1.p2	3	14.46	88.0109	99.53	probably fused
WBGene00202874	TRINITY_DN5418_c0_g1_i1.p1	3	14.33	96.1399	100	probably fused
WBGene00099233	TRINITY_DN2367_c0_g1_i1.p1	3	14.29	98.009	100	probably fused
WBGene00101515	TRINITY_DN9662_c0_g1_i1.p1	3	13.95	99.2992	84.02	probably fused
WBGene00092356	TRINITY_DN8795_c0_g4_i1.p1	3	13.92	97.953	92.81	probably fused
WBGene00101375	TRINITY_DN4183_c0_g1_i1.p1	3	13.89	98.4304	88.16	probably fused
WBGene00094388	TRINITY_DN842_c0_g5_i2.p1	3	13.87	93.4064	72.87	probably fused
WBGene00279783	TRINITY_DN6243_c0_g1_i1.p1	3	13.83	95.7942	12.46	probably fused
WBGene00091933	TRINITY_DN3570_c0_g1_i2.p1	3	13.67	96.8017	90.26	probably fused
WBGene00091933	TRINITY_DN6202_c0_g1_i1.p1	3	13.59	99.1798	92.13	probably fused
WBGene00276994	TRINITY_DN473_c1_g1_i8.p2	3	13.55	93.8694	97.96	probably fused
WBGene00118753	TRINITY_DN5145_c0_g1_i1.p1	3	13.39	98.483	93.69	probably fused
WBGene00096327	TRINITY_DN2123_c0_g1_i1.p1	3	13.34	97.8484	97.63	probably fused
WBGene00276305	TRINITY_DN6103_c0_g4_i1.p1	3	13.31	87.5106	14	probably fused
WBGene00100837	TRINITY_DN1229_c0_g5_i1.p1	3	13.1	97.3843	79.56	probably fused
WBGene00097499	TRINITY_DN12394_c0_g2_i1.p1	3	12.99	97.253	99.44	probably fused
WBGene00107117	TRINITY_DN27455_c0_g1_i1.p1	3	12.69	93.3133	NA	probably fused
WBGene00092356	TRINITY_DN33546_c0_g1_i1.p1	3	12.54	98.6298	94.52	probably fused
WBGene00106864	TRINITY_DN30318_c0_g1_i1.p1	3	12.51	98.6339	100	probably fused
WBGene00099445	TRINITY_DN7446_c0_g1_i1.p1	3	12.47	83.186	66.97	probably fused
WBGene00115116	TRINITY_DN2337_c0_g1_i2.p1	3	12.26	98.4928	92.31	probably fused
WBGene00095954	TRINITY_DN2479_c0_g3_i1.p1	3	12.26	87.1284	13.21	probably fused
WBGene00094388	TRINITY_DN5895_c1_g1_i1.p1	3	12.08	98.4168	73.13	probably fused
WBGene00275401	TRINITY_DN13372_c0_g1_i1.p1	3	12.08	97.2455	55.56	probably fused
WBGene00098085	TRINITY_DN4950_c0_g1_i1.p1	3	11.57	99.5191	86.75	probably fused
WBGene00115036	TRINITY_DN6628_c0_g1_i2.p1	3	11.12	91.6166	95.39	probably fused
WBGene00099242	TRINITY_DN34933_c0_g1_i1.p1	3	10.87	99.8653	97.35	probably fused
WBGene00100837	TRINITY_DN6905_c0_g1_i1.p1	3	10.85	98.2275	NA	probably fused
WBGene00092209	TRINITY_DN5628_c0_g1_i1.p1	3	10.79	90.7589	95.42	probably fused
WBGene00116876	TRINITY_DN5195_c0_g1_i1.p1	3	10.78	96.4355	98.76	probably fused
WBGene00107713	TRINITY_DN4391_c0_g1_i1.p2	3	10.76	92.5731	81.17	probably fused
WBGene00112170	TRINITY_DN6563_c0_g1_i1.p1	3	10.66	98.9758	100	probably fused
WBGene00204665	TRINITY_DN1327_c0_g1_i2.p1	3	10.63	84.4992	76.4	probably fused
WBGene00113525	TRINITY_DN24381_c0_g1_i1.p1	3	10.53	95.8062	69.95	probably fused
WBGene00090229	TRINITY_DN31959_c0_g1_i1.p1	3	10.36	96.6567	34.31	probably fused
WBGene00091221	TRINITY_DN14441_c0_g1_i1.p1	3	10.33	90.2183	10.2	probably fused
WBGene00113525	TRINITY_DN8019_c0_g1_i1.p1	3	10.1	95.9655	100	probably fused
WBGene00092209	TRINITY_DN31152_c0_g1_i1.p1	3	10.08	96.7955	17.46	probably fused
WBGene00103203	TRINITY_DN5828_c0_g1_i1.p1	3	10.02	98.0511	50.92	probably fused
WBGene00272395	TRINITY_DN2812_c0_g1_i1.p1	3	9.57	96.4791	81.13	probably fused
WBGene00098666	TRINITY_DN6609_c0_g1_i1.p1	3	9.5	93.7315	93.55	probably fused
WBGene00202874	TRINITY_DN5784_c0_g1_i1.p1	3	8.67	91.3946	92.22	probably fused
WBGene00206179	TRINITY_DN5030_c0_g2_i1.p1	3	8.63	95.1395	75.14	probably fused
WBGene00098666	TRINITY_DN3452_c0_g2_i1.p1	3	8.15	98.6287	97.42	probably fused
WBGene00094763	TRINITY_DN28932_c0_g1_i1.p1	3	7.86	96.4297	42.83	probably fused
WBGene00097813	TRINITY_DN24984_c0_g1_i1.p1	3	7.49	99.0208	NA	probably fused
WBGene00101515	TRINITY_DN5661_c0_g1_i1.p1	3	7.36	98.6596	100	probably fused
WBGene00103203	TRINITY_DN839_c2_g2_i2.p1	3	7.07	88.7855	16.96	probably fused
WBGene00101375	TRINITY_DN3218_c0_g1_i2.p1	3	6.94	87.7223	70.78	probably fused
WBGene00090229	TRINITY_DN8473_c0_g2_i1.p1	3	6.91	86.6822	100	probably fused
WBGene00092732	TRINITY_DN6213_c0_g1_i2.p1	3	6.76	97.5931	100	probably fused
WBGene00103203	TRINITY_DN6201_c0_g1_i2.p1	3	6.67	81.5561	NA	probably fused
WBGene00094280	TRINITY_DN5190_c0_g1_i1.p1	3	6.66	96.2685	98.74	probably fused
WBGene00096769	TRINITY_DN11043_c0_g1_i1.p1	3	6.56	98.3319	92.55	probably fused
WBGene00094763	TRINITY_DN1922_c0_g1_i2.p1	3	6.44	91.932	95.2	probably fused
WBGene00096327	TRINITY_DN62_c0_g2_i1.p2	3	6.05	89.8101	72.62	probably fused
WBGene00099242	TRINITY_DN5179_c0_g1_i1.p2	3	5.98	94.7706	91.07	probably fused
WBGene00104705	TRINITY_DN6498_c0_g1_i1.p1	3	5.89	96.9426	90.36	probably fused
WBGene00096769	TRINITY_DN34415_c0_g1_i1.p1	3	5.82	98.9487	96.06	probably fused
WBGene00114796	TRINITY_DN7019_c0_g1_i1.p2	3	5.8	94.9447	100	probably fused
WBGene00093448	TRINITY_DN24498_c0_g1_i1.p2	3	5.68	91.5685	NA	probably fused
WBGene00109083	TRINITY_DN31654_c0_g1_i1.p1	3	5.31	99.2608	100	probably fused
WBGene00095954	TRINITY_DN31998_c0_g1_i2.p1	3	4.03	90.81	95.58	probably fused
WBGene00118753	TRINITY_DN6847_c0_g1_i1.p2	3	3.27	98.1318	96.77	probably fused
WBGene00090078	TRINITY_DN14089_c0_g1_i1.p1	3	2.71	84.9956	NA	probably fused
WBGene00109083	TRINITY_DN27070_c0_g1_i1.p1	3	2.15	98.4037	85.53	probably fused
WBGene00094763	TRINITY_DN212_c0_g1_i1.p1	3	2.12	96.4325	NA	probably fused
WBGene00099965	TRINITY_DN7299_c0_g2_i2.p1.path2;Name	2	NA	NA	NA	probably fused
WBGene00101507	TRINITY_DN295_c0_g1_i2.p1.path2;Name	2	NA	NA	NA	probably fused
WBGene00103958	TRINITY_DN8230_c0_g1_i1.p1.path2;Name	2	NA	NA	NA	probably fused
WBGene00106570	TRINITY_DN19542_c0_g1_i1.p1.path2;Name	2	NA	NA	NA	probably fused
WBGene00280352	TRINITY_DN14882_c1_g5_i1.p2	2	NA	92.9195	NA	probably fused
WBGene00092116	TRINITY_DN1147_c0_g1_i3.p1	2	NA	99.4726	98.75	probably fused
WBGene00278620	TRINITY_DN428_c0_g1_i1.p1	2	NA	87.6417	48.68	probably fused
WBGene00304253	TRINITY_DN12137_c0_g2_i2.p2	2	100	91.4872	100	probably fused
WBGene00090085	TRINITY_DN6528_c0_g2_i1.p1	2	100	98.9569	99.37	probably fused
WBGene00111234	TRINITY_DN11254_c0_g1_i1.p1	2	100	86.6727	99.1	probably fused
WBGene00107896	TRINITY_DN13565_c0_g1_i1.p1	2	100	97.8199	97.01	probably fused
WBGene00109987	TRINITY_DN23912_c0_g1_i1.p1	2	100	96.595	25.82	probably fused
WBGene00112365	TRINITY_DN25211_c0_g1_i1.p1	2	97.44	93.6904	96.93	probably fused
WBGene00117763	TRINITY_DN1165_c0_g1_i6.p1	2	94.42	86.8694	94.35	probably fused
WBGene00280352	TRINITY_DN14882_c1_g4_i1.p1	2	93.71	93.9055	94.04	probably fused
WBGene00103099	TRINITY_DN2955_c0_g2_i2.p1	2	92.9	97.8487	25.81	probably fused
WBGene00280003	TRINITY_DN6031_c0_g2_i2.p1	2	92.86	98.1654	96.09	probably fused
WBGene00111234	TRINITY_DN4873_c0_g2_i1.p1	2	90.91	91.1516	34.01	probably fused
WBGene00273094	TRINITY_DN8250_c0_g2_i1.p1	2	90.4	93.4422	38.66	probably fused
WBGene00115062	TRINITY_DN6001_c0_g1_i1.p1	2	90	98.8382	52.76	probably fused
WBGene00203618	TRINITY_DN29780_c0_g1_i1.p1	2	89.51	98.4272	99.28	probably fused
WBGene00091749	TRINITY_DN1068_c0_g1_i2.p1	2	89.51	95.0833	55.5	probably fused
WBGene00094879	TRINITY_DN1699_c0_g4_i1.p1	2	89.39	94.3102	51.98	probably fused
WBGene00096033	TRINITY_DN4290_c0_g1_i1.p1	2	89.35	95.7942	90.48	probably fused
WBGene00106559	TRINITY_DN5255_c0_g1_i1.p1	2	88.7	96.3256	59.67	probably fused
WBGene00281507	TRINITY_DN17315_c0_g2_i1.p1	2	88.56	95.907	91.85	probably fused
WBGene00098826	TRINITY_DN10197_c0_g2_i2.p1	2	88.14	99.1366	87.96	probably fused
WBGene00094844	TRINITY_DN6568_c0_g1_i1.p1	2	87.91	88.4216	98.33	probably fused
WBGene00099305	TRINITY_DN6114_c0_g1_i1.p1	2	87.89	97.0518	64.89	probably fused
WBGene00113399	TRINITY_DN16639_c0_g1_i7.p1	2	87.74	94.1753	98.51	probably fused
WBGene00117332	TRINITY_DN6745_c0_g2_i3.p1	2	87.51	88.1827	99.31	probably fused
WBGene00280086	TRINITY_DN18430_c0_g2_i1.p1	2	87.21	93.9033	69.26	probably fused
WBGene00098827	TRINITY_DN217_c1_g1_i5.p1	2	86.58	97.3524	83.81	probably fused
WBGene00098827	TRINITY_DN217_c1_g1_i12.p1	2	85.41	95.862	79.89	probably fused
WBGene00114809	TRINITY_DN5456_c0_g1_i1.p1	2	85.24	98.1764	98	probably fused
WBGene00114744	TRINITY_DN8659_c0_g1_i1.p1	2	84.74	98.7686	95.95	probably fused
WBGene00090351	TRINITY_DN5311_c0_g1_i3.p1	2	84.23	81.5388	NA	probably fused
WBGene00110030	TRINITY_DN6384_c0_g1_i1.p1	2	83.88	95.7499	NA	probably fused
WBGene00202917	TRINITY_DN2996_c0_g1_i5.p1	2	83.02	92.6039	43.91	probably fused
WBGene00278150	TRINITY_DN1679_c1_g2_i5.p1	2	83	91.7369	56.93	probably fused
WBGene00115977	TRINITY_DN4238_c0_g2_i3.p1	2	82.89	97.422	95.84	probably fused
WBGene00105313	TRINITY_DN4843_c0_g1_i1.p1	2	82.85	98.5583	52.9	probably fused
WBGene00110596	TRINITY_DN12210_c0_g4_i2.p1	2	82.77	96.7433	86.42	probably fused
WBGene00105492	TRINITY_DN24394_c0_g1_i1.p1	2	82.52	90.4125	92.08	probably fused
WBGene00276738	TRINITY_DN17673_c1_g1_i1.p1	2	82.38	98.1358	82.45	probably fused
WBGene00093695	TRINITY_DN809_c0_g3_i1.p1	2	82.19	97.0608	43.56	probably fused
WBGene00282344	TRINITY_DN4067_c0_g1_i4.p1	2	82.19	91.1492	31.58	probably fused
WBGene00098731	TRINITY_DN9700_c0_g1_i1.p1	2	81.89	98.533	NA	probably fused
WBGene00098899	TRINITY_DN1492_c0_g1_i1.p1	2	81.87	99.0317	100	probably fused
WBGene00113193	TRINITY_DN8821_c0_g1_i1.p1	2	81.37	98.7035	97.57	probably fused
WBGene00110638	TRINITY_DN8952_c3_g1_i1.p1	2	81.3	86.3483	20.92	probably fused
WBGene00098457	TRINITY_DN18200_c0_g1_i3.p1	2	81.11	95.686	100	probably fused
WBGene00115041	TRINITY_DN296_c0_g1_i5.p1	2	81.01	97.6406	98.87	probably fused
WBGene00109352	TRINITY_DN2974_c0_g1_i1.p1	2	80.9	96.9789	32.96	probably fused
WBGene00114951	TRINITY_DN16405_c0_g1_i1.p1	2	80.54	98.3177	96.2	probably fused
WBGene00093669	TRINITY_DN3203_c0_g1_i1.p1	2	80.46	95.4148	95.33	probably fused
WBGene00105968	TRINITY_DN3414_c0_g1_i1.p1	2	80.42	98.7536	98.72	probably fused
WBGene00108074	TRINITY_DN1116_c0_g1_i1.p1	2	79.79	94.8715	99.51	probably fused
WBGene00273669	TRINITY_DN795_c0_g1_i1.p1	2	79.76	94.4775	61.45	probably fused
WBGene00278611	TRINITY_DN1777_c0_g2_i1.p1	2	79.58	99.6084	96.9	probably fused
WBGene00278834	TRINITY_DN5588_c0_g1_i4.p1	2	79.41	96.3806	41.43	probably fused
WBGene00099275	TRINITY_DN798_c0_g1_i3.p1	2	78.82	99.255	100	probably fused
WBGene00089892	TRINITY_DN31408_c0_g1_i1.p1	2	78.59	97.8308	76.77	probably fused
WBGene00106954	TRINITY_DN3449_c0_g1_i1.p1	2	78.48	97.8965	96.1	probably fused
WBGene00098403	TRINITY_DN4568_c0_g1_i1.p1	2	78.48	96.7264	92.07	probably fused
WBGene00103616	TRINITY_DN4199_c0_g1_i3.p1	2	77.96	92.9379	67.84	probably fused
WBGene00283835	TRINITY_DN25137_c0_g1_i1.p1	2	77.58	98.2267	99.22	probably fused
WBGene00115824	TRINITY_DN31131_c0_g1_i1.p1	2	77.55	98.8166	63.79	probably fused
WBGene00104961	TRINITY_DN9037_c0_g1_i1.p1	2	76.95	84.249	NA	probably fused
WBGene00103548	TRINITY_DN2922_c0_g1_i1.p1	2	76.9	97.3521	84.79	probably fused
WBGene00109987	TRINITY_DN24719_c0_g1_i1.p1	2	76.88	99.3328	59.32	probably fused
WBGene00282442	TRINITY_DN10579_c0_g1_i1.p1	2	76.67	98.2367	92.79	probably fused
WBGene00091977	TRINITY_DN2089_c0_g4_i2.p1	2	76.57	85.7121	81.21	probably fused
WBGene00278566	TRINITY_DN1800_c0_g1_i3.p1	2	76.45	96.4612	98.63	probably fused
WBGene00103704	TRINITY_DN31336_c0_g1_i1.p1	2	75.84	98.6467	59.74	probably fused
WBGene00107680	TRINITY_DN18452_c0_g2_i1.p1	2	75.7	91.3525	55.32	probably fused
WBGene00093127	TRINITY_DN9687_c0_g1_i1.p1	2	75.36	98.1852	NA	probably fused
WBGene00116673	TRINITY_DN7417_c0_g1_i1.p1	2	75.3	99.2437	100	probably fused
WBGene00098847	TRINITY_DN1909_c0_g3_i3.p1	2	74.69	98.3468	98.91	probably fused
WBGene00110480	TRINITY_DN33798_c0_g1_i1.p1	2	74.28	90.0835	83.95	probably fused
WBGene00099246	TRINITY_DN7985_c0_g1_i1.p1	2	74.27	98.7772	99.18	probably fused
WBGene00111173	TRINITY_DN31480_c0_g1_i1.p1	2	74.1	99.0286	97.49	probably fused
WBGene00104722	TRINITY_DN6187_c0_g1_i1.p1	2	73.99	98.687	99.14	probably fused
WBGene00202917	TRINITY_DN2996_c0_g1_i7.p1	2	73.94	90.2262	24.41	probably fused
WBGene00094693	TRINITY_DN127_c1_g2_i1.p1	2	73.89	92.574	70.87	probably fused
WBGene00106791	TRINITY_DN1592_c2_g1_i1.p1	2	73.8	98.1033	48.47	probably fused
WBGene00096023	TRINITY_DN2658_c0_g1_i1.p1	2	73.4	99.173	85.84	probably fused
WBGene00090599	TRINITY_DN7126_c0_g2_i6.p1	2	73.32	86.1958	87.74	probably fused
WBGene00114928	TRINITY_DN1130_c0_g1_i3.p1	2	73.14	97.6983	79.54	probably fused
WBGene00275840	TRINITY_DN27322_c0_g1_i1.p1	2	73.1	98.4238	98.2	probably fused
WBGene00112990	TRINITY_DN1157_c0_g1_i2.p1	2	72.94	98.7084	76.06	probably fused
WBGene00092047	TRINITY_DN3453_c0_g1_i1.p1	2	72.86	99.0612	98.85	probably fused
WBGene00106344	TRINITY_DN767_c0_g1_i3.p1	2	72.78	93.8129	94.24	probably fused
WBGene00097101	TRINITY_DN3356_c0_g1_i1.p1	2	72.61	98.7184	53.18	probably fused
WBGene00096913	TRINITY_DN15023_c0_g1_i3.p1	2	72.4	85.0232	83.14	probably fused
WBGene00092432	TRINITY_DN3947_c0_g1_i1.p1	2	72.38	89.6927	97.14	probably fused
WBGene00101511	TRINITY_DN295_c0_g1_i4.p1	2	72.32	99.2295	99.24	probably fused
WBGene00195123	TRINITY_DN10033_c0_g1_i1.p1	2	72.32	98.594	73.2	probably fused
WBGene00118240	TRINITY_DN20307_c0_g1_i1.p1	2	71.95	97.9984	98.49	probably fused
WBGene00116843	TRINITY_DN2804_c0_g1_i3.p1	2	71.79	99.52	98.41	probably fused
WBGene00281276	TRINITY_DN1398_c0_g3_i1.p1	2	71.68	98.2114	97.37	probably fused
WBGene00099450	TRINITY_DN10651_c0_g1_i1.p1	2	71.55	98.9658	18.61	probably fused
WBGene00118458	TRINITY_DN17493_c0_g1_i4.p1	2	71.46	97.5602	100	probably fused
WBGene00116312	TRINITY_DN251_c0_g1_i1.p1	2	71.23	88.3482	97.4	probably fused
WBGene00107094	TRINITY_DN3891_c0_g3_i2.p1	2	71.11	97.251	NA	probably fused
WBGene00116803	TRINITY_DN2051_c0_g4_i2.p1	2	70.69	94.8236	NA	probably fused
WBGene00205391	TRINITY_DN4401_c0_g1_i1.p1	2	70.09	96.8857	90.15	probably fused
WBGene00097611	TRINITY_DN309_c0_g1_i6.p1	2	70.09	92.6527	70.65	probably fused
WBGene00098413	TRINITY_DN31176_c0_g1_i1.p1	2	69.96	98.5327	98.65	probably fused
WBGene00089664	TRINITY_DN5867_c0_g1_i2.p1	2	69.8	96.0616	100	probably fused
WBGene00089646	TRINITY_DN2418_c1_g1_i1.p1	2	69.78	98.4956	86.94	probably fused
WBGene00116880	TRINITY_DN1024_c0_g2_i1.p1	2	69.77	96.1309	85.08	probably fused
WBGene00097791	TRINITY_DN514_c1_g1_i1.p1	2	69.71	98.6083	NA	probably fused
WBGene00114227	TRINITY_DN5446_c0_g3_i1.p1	2	69.38	97.4647	90.11	probably fused
WBGene00091414	TRINITY_DN7224_c0_g1_i2.p1	2	69.32	99.275	88.89	probably fused
WBGene00103546	TRINITY_DN8477_c0_g1_i2.p1	2	69.29	99.2878	98.77	probably fused
WBGene00100714	TRINITY_DN7820_c0_g1_i1.p1	2	69.13	94.5818	31.92	probably fused
WBGene00101647	TRINITY_DN7734_c0_g2_i1.p1	2	69.08	96.4317	89.11	probably fused
WBGene00118157	TRINITY_DN6093_c0_g2_i2.p1	2	69.02	91.554	73.73	probably fused
WBGene00114077	TRINITY_DN31276_c0_g1_i1.p1	2	68.78	96.9962	85.85	probably fused
WBGene00091987	TRINITY_DN2177_c0_g1_i1.p1	2	68.49	98.2572	83.36	probably fused
WBGene00275866	TRINITY_DN323_c0_g1_i1.p1	2	68.47	98.1292	64.23	probably fused
WBGene00091150	TRINITY_DN10205_c0_g1_i1.p1	2	68.41	91.9651	100	probably fused
WBGene00103767	TRINITY_DN15729_c0_g1_i2.p1	2	68.07	91.376	99.59	probably fused
WBGene00118510	TRINITY_DN6739_c0_g1_i1.p1	2	67.91	99.5246	21.13	probably fused
WBGene00281812	TRINITY_DN440_c0_g1_i3.p1	2	67.87	90.9267	92.6	probably fused
WBGene00098129	TRINITY_DN7586_c0_g2_i3.p1	2	67.75	94.2035	96.6	probably fused
WBGene00282021	TRINITY_DN5305_c0_g2_i1.p1	2	67.69	99.0023	92.77	probably fused
WBGene00099954	TRINITY_DN1667_c0_g1_i2.p1	2	67.65	99.4121	98.71	probably fused
WBGene00092645	TRINITY_DN3822_c0_g3_i1.p1	2	67.6	96.1917	99.66	probably fused
WBGene00092853	TRINITY_DN3044_c0_g1_i1.p1	2	67.49	98.8634	92.69	probably fused
WBGene00114553	TRINITY_DN24983_c0_g1_i1.p1	2	67.37	98.8458	84.64	probably fused
WBGene00113540	TRINITY_DN4661_c0_g1_i1.p1	2	67.35	93.5971	46.55	probably fused
WBGene00117291	TRINITY_DN9715_c0_g3_i1.p1	2	67.22	99.0469	73.24	probably fused
WBGene00273249	TRINITY_DN9084_c0_g1_i1.p1	2	67.02	96.7017	NA	probably fused
WBGene00304692	TRINITY_DN7918_c0_g1_i3.p1	2	67.01	89.1638	NA	probably fused
WBGene00111607	TRINITY_DN7339_c0_g1_i1.p1	2	66.86	98.7696	96.47	probably fused
WBGene00100882	TRINITY_DN3133_c1_g1_i5.p1	2	66.86	89.8949	72.41	probably fused
WBGene00095300	TRINITY_DN3344_c0_g2_i2.p2	2	66.84	95.7502	66.88	probably fused
WBGene00090280	TRINITY_DN5599_c0_g1_i1.p1	2	66.54	96.2981	100	probably fused
WBGene00093685	TRINITY_DN78_c0_g1_i1.p1	2	66.33	98.8043	93.67	probably fused
WBGene00275866	TRINITY_DN33582_c0_g1_i1.p1	2	66.26	97.3322	63.99	probably fused
WBGene00107024	TRINITY_DN42_c0_g4_i1.p1	2	66.23	98.9443	100	probably fused
WBGene00097422	TRINITY_DN17590_c0_g1_i1.p1	2	65.89	98.5007	99.54	probably fused
WBGene00094650	TRINITY_DN2019_c0_g3_i1.p1	2	65.89	93.388	62.62	probably fused
WBGene00097126	TRINITY_DN31564_c0_g1_i1.p1	2	65.78	97.6698	98.82	probably fused
WBGene00112423	TRINITY_DN75_c0_g1_i1.p1	2	65.71	97.5059	97.4	probably fused
WBGene00096594	TRINITY_DN2860_c0_g1_i5.p1	2	65.69	91.1057	41.33	probably fused
WBGene00098713	TRINITY_DN7909_c1_g1_i1.p1	2	65.56	98.9269	22.42	probably fused
WBGene00272641	TRINITY_DN697_c0_g1_i6.p1	2	65.4	95.2035	56.62	probably fused
WBGene00112312	TRINITY_DN4655_c0_g1_i1.p1	2	65.31	98.9247	99.79	probably fused
WBGene00108363	TRINITY_DN1429_c0_g1_i1.p1	2	65.3	96.5573	96.46	probably fused
WBGene00278206	TRINITY_DN9326_c0_g1_i1.p1	2	65.29	98.2016	56.68	probably fused
WBGene00104492	TRINITY_DN25011_c0_g1_i1.p1	2	65.17	98.8708	99.62	probably fused
WBGene00107973	TRINITY_DN33594_c0_g1_i1.p1	2	65.04	99.0424	97.54	probably fused
WBGene00116299	TRINITY_DN1534_c0_g1_i1.p1	2	64.89	97.1593	1.34	probably fused
WBGene00118651	TRINITY_DN6289_c0_g1_i1.p1	2	64.84	93.7303	91.72	probably fused
WBGene00277067	TRINITY_DN686_c0_g2_i2.p1	2	64.76	96.0209	47.6	probably fused
WBGene00096039	TRINITY_DN31798_c0_g1_i1.p1	2	64.71	98.8755	95.77	probably fused
WBGene00118153	TRINITY_DN6968_c0_g1_i1.p1	2	64.7	97.8671	98.68	probably fused
WBGene00110799	TRINITY_DN7324_c0_g1_i2.p1	2	64.7	93.9361	98.58	probably fused
WBGene00281477	TRINITY_DN14975_c0_g1_i1.p1	2	64.52	97.867	59.56	probably fused
WBGene00273210	TRINITY_DN17585_c0_g1_i1.p1	2	64.45	99.1544	90.28	probably fused
WBGene00276162	TRINITY_DN809_c0_g1_i1.p1	2	64.4	98.5227	92.13	probably fused
WBGene00280223	TRINITY_DN7410_c0_g1_i1.p1	2	64.38	98.2119	84.36	probably fused
WBGene00113108	TRINITY_DN1814_c0_g1_i3.p1	2	64.31	82.8541	95.06	probably fused
WBGene00097154	TRINITY_DN12997_c0_g1_i1.p1	2	64.29	98.7575	97.7	probably fused
WBGene00272236	TRINITY_DN33640_c0_g1_i1.p1	2	64.26	99.394	64.58	probably fused
WBGene00096005	TRINITY_DN14391_c0_g4_i3.p1	2	64.16	97.0271	100	probably fused
WBGene00108059	TRINITY_DN7466_c0_g1_i2.p1	2	64.13	94.1481	98.35	probably fused
WBGene00304253	TRINITY_DN12137_c0_g2_i1.p1	2	64.11	96.8808	95.89	probably fused
WBGene00117789	TRINITY_DN19751_c0_g1_i1.p1	2	64	88.8309	NA	probably fused
WBGene00118327	TRINITY_DN12072_c0_g1_i1.p1	2	63.9	98.819	97.49	probably fused
WBGene00117372	TRINITY_DN4481_c0_g1_i1.p1	2	63.9	96.2971	84.18	probably fused
WBGene00273488	TRINITY_DN11520_c0_g2_i1.p1	2	63.85	97.6966	6.83	probably fused
WBGene00090408	TRINITY_DN7836_c0_g1_i1.p1	2	63.64	98.5931	99.8	probably fused
WBGene00098027	TRINITY_DN1877_c0_g1_i1.p1	2	63.6	81.0598	66.3	probably fused
WBGene00105466	TRINITY_DN3379_c0_g1_i1.p1	2	63.25	92.3567	100	probably fused
WBGene00115661	TRINITY_DN16912_c0_g1_i1.p1	2	63.02	93.1157	63.86	probably fused
WBGene00102159	TRINITY_DN4600_c0_g1_i1.p1	2	62.89	87.4281	92.45	probably fused
WBGene00102180	TRINITY_DN34000_c0_g1_i1.p1	2	62.86	98.3814	67.33	probably fused
WBGene00114491	TRINITY_DN29327_c0_g1_i1.p1	2	62.84	99.054	99.53	probably fused
WBGene00275306	TRINITY_DN4443_c0_g3_i1.p1	2	62.55	98.6549	98.5	probably fused
WBGene00105760	TRINITY_DN136_c3_g1_i1.p1	2	62.45	95.825	33.8	probably fused
WBGene00099520	TRINITY_DN13087_c0_g1_i1.p1	2	62.43	98.9343	99.89	probably fused
WBGene00110755	TRINITY_DN11226_c0_g1_i1.p1	2	62.42	96.2445	80.94	probably fused
WBGene00092116	TRINITY_DN1940_c0_g1_i1.p1	2	62.4	98.7606	50.06	probably fused
WBGene00112093	TRINITY_DN2740_c0_g2_i1.p1	2	62.39	96.5297	70.02	probably fused
WBGene00102874	TRINITY_DN27701_c0_g1_i1.p1	2	62.37	95.7201	65.26	probably fused
WBGene00111171	TRINITY_DN3537_c0_g1_i1.p1	2	62.34	99.1464	98.82	probably fused
WBGene00098594	TRINITY_DN29298_c0_g1_i1.p1	2	62.33	98.2189	98.06	probably fused
WBGene00110002	TRINITY_DN4405_c0_g2_i2.p1	2	62.29	98.7654	97.09	probably fused
WBGene00202649	TRINITY_DN29184_c0_g1_i1.p1	2	62.1	98.6048	85.35	probably fused
WBGene00110514	TRINITY_DN8983_c0_g1_i1.p1	2	62.09	96.5224	99.52	probably fused
WBGene00114904	TRINITY_DN22081_c0_g2_i5.p1	2	62.07	96.9575	NA	probably fused
WBGene00109362	TRINITY_DN489_c0_g1_i3.p1	2	61.99	91.2444	99.88	probably fused
WBGene00282377	TRINITY_DN13395_c0_g2_i1.p1	2	61.76	89.687	32.88	probably fused
WBGene00206300	TRINITY_DN3172_c0_g2_i2.p1	2	61.54	97.3916	100	probably fused
WBGene00105576	TRINITY_DN4598_c0_g1_i2.p1	2	61.46	97.1302	99.54	probably fused
WBGene00090085	TRINITY_DN12670_c0_g1_i4.p1	2	61.24	98.5834	96.19	probably fused
WBGene00204255	TRINITY_DN4274_c0_g1_i1.p1	2	61.22	99.5849	34.5	probably fused
WBGene00111396	TRINITY_DN10480_c0_g1_i1.p1	2	61.17	98.8536	99.51	probably fused
WBGene00096244	TRINITY_DN2570_c0_g1_i7.p1	2	61.04	95.8459	92.06	probably fused
WBGene00115957	TRINITY_DN704_c1_g2_i1.p1	2	60.99	99.0764	56.59	probably fused
WBGene00099907	TRINITY_DN8389_c0_g1_i1.p1	2	60.98	98.7458	79.38	probably fused
WBGene00090021	TRINITY_DN1251_c2_g1_i2.p1	2	60.59	96.8219	98.38	probably fused
WBGene00108318	TRINITY_DN1349_c0_g1_i1.p1	2	60.59	97.8248	98.3	probably fused
WBGene00203496	TRINITY_DN2331_c0_g1_i4.p1	2	60.46	90.9795	NA	probably fused
WBGene00108351	TRINITY_DN16450_c0_g1_i1.p1	2	60.44	97.1273	99.86	probably fused
WBGene00274265	TRINITY_DN18596_c0_g1_i1.p1	2	60.44	86.8384	79.95	probably fused
WBGene00111469	TRINITY_DN4302_c0_g1_i1.p1	2	60.4	83.1624	26.76	probably fused
WBGene00090973	TRINITY_DN7745_c0_g2_i3.p1	2	60.35	97.201	91.83	probably fused
WBGene00107194	TRINITY_DN31226_c0_g1_i1.p1	2	60.33	91.2319	93.05	probably fused
WBGene00272695	TRINITY_DN6054_c1_g5_i1.p1	2	60.31	92.6462	72.8	probably fused
WBGene00116965	TRINITY_DN33527_c0_g1_i1.p1	2	60.3	98.8537	99.57	probably fused
WBGene00111805	TRINITY_DN337_c0_g1_i1.p1	2	60.19	93.8957	NA	probably fused
WBGene00107008	TRINITY_DN9672_c0_g1_i2.p1	2	60.19	89.9031	88.98	probably fused
WBGene00113209	TRINITY_DN14685_c0_g2_i1.p1	2	60.17	97.7275	93.24	probably fused
WBGene00203520	TRINITY_DN5205_c0_g1_i2.p1	2	60.06	92.0481	98.06	probably fused
WBGene00100848	TRINITY_DN2873_c0_g2_i1.p1	2	59.95	92.353	83.73	probably fused
WBGene00104483	TRINITY_DN9732_c0_g1_i1.p1	2	59.65	99.1909	100	probably fused
WBGene00115097	TRINITY_DN1901_c0_g1_i1.p1	2	59.64	97.2551	99.6	probably fused
WBGene00090277	TRINITY_DN17894_c1_g1_i1.p1	2	59.6	98.1396	91.08	probably fused
WBGene00100815	TRINITY_DN1924_c0_g1_i3.p1	2	59.53	97.6747	79.56	probably fused
WBGene00106177	TRINITY_DN21541_c0_g1_i1.p1	2	59.42	88.091	53.43	probably fused
WBGene00100282	TRINITY_DN23047_c0_g1_i1.p1	2	59.37	93.2113	27.29	probably fused
WBGene00107989	TRINITY_DN1177_c1_g1_i1.p1	2	59.37	97.7689	22.24	probably fused
WBGene00106334	TRINITY_DN10416_c0_g2_i3.p1	2	59.27	95.5315	91.37	probably fused
WBGene00108891	TRINITY_DN29061_c0_g1_i1.p1	2	59.17	98.7431	100	probably fused
WBGene00102177	TRINITY_DN4435_c0_g1_i1.p1	2	59.05	97.6738	NA	probably fused
WBGene00118086	TRINITY_DN133_c0_g1_i1.p1	2	58.85	95.0664	98.88	probably fused
WBGene00103270	TRINITY_DN12210_c0_g3_i1.p1	2	58.43	98.8977	97.89	probably fused
WBGene00103629	TRINITY_DN1664_c0_g1_i1.p1	2	58.32	99.1087	95.94	probably fused
WBGene00116771	TRINITY_DN7516_c0_g1_i1.p1	2	58.3	98.0622	99.47	probably fused
WBGene00278275	TRINITY_DN1654_c0_g4_i5.p1	2	58.26	93.1884	83.55	probably fused
WBGene00100979	TRINITY_DN15678_c0_g1_i1.p1	2	58.15	98.9128	92.78	probably fused
WBGene00275862	TRINITY_DN5057_c0_g1_i1.p1	2	58.1	98.7457	NA	probably fused
WBGene00114548	TRINITY_DN4060_c0_g2_i1.p1	2	58.08	91.9399	56.53	probably fused
WBGene00109675	TRINITY_DN7587_c0_g1_i1.p1	2	58.05	96.0612	NA	probably fused
WBGene00280550	TRINITY_DN8544_c0_g1_i1.p1	2	58.03	98.774	97.37	probably fused
WBGene00277970	TRINITY_DN1016_c0_g1_i4.p1	2	57.96	94.292	100	probably fused
WBGene00092792	TRINITY_DN4754_c0_g2_i4.p1	2	57.78	92.8595	44.68	probably fused
WBGene00114723	TRINITY_DN7449_c0_g1_i1.p1	2	57.39	98.7374	98.79	probably fused
WBGene00108640	TRINITY_DN14180_c0_g1_i1.p1	2	57.3	98.9445	91.98	probably fused
WBGene00105770	TRINITY_DN6771_c0_g1_i1.p1	2	57.27	98.6545	95.22	probably fused
WBGene00090658	TRINITY_DN29089_c0_g1_i1.p1	2	57.08	96.0283	98.77	probably fused
WBGene00276133	TRINITY_DN23528_c0_g1_i1.p1	2	57.05	97.2317	95.3	probably fused
WBGene00111553	TRINITY_DN2940_c0_g1_i3.p1	2	57.04	92.8252	96.43	probably fused
WBGene00111892	TRINITY_DN3668_c0_g1_i3.p2	2	57.02	94.7294	98.4	probably fused
WBGene00089902	TRINITY_DN413_c0_g1_i1.p1	2	56.95	98.6339	94.54	probably fused
WBGene00095779	TRINITY_DN5173_c0_g1_i2.p1	2	56.88	96.9229	53.81	probably fused
WBGene00092856	TRINITY_DN3106_c0_g1_i7.p1	2	56.86	86.3432	84.42	probably fused
WBGene00274922	TRINITY_DN11320_c0_g1_i1.p1	2	56.67	98.552	100	probably fused
WBGene00112329	TRINITY_DN9667_c0_g1_i1.p1	2	56.65	98.8473	99.85	probably fused
WBGene00103700	TRINITY_DN31296_c0_g1_i1.p1	2	56.58	98.0578	99.51	probably fused
WBGene00097990	TRINITY_DN4968_c0_g1_i1.p1	2	56.58	92.2793	96.28	probably fused
WBGene00115057	TRINITY_DN7943_c0_g1_i2.p1	2	56.37	98.7338	97.01	probably fused
WBGene00095971	TRINITY_DN137_c0_g1_i2.p1	2	56.33	98.3008	99.32	probably fused
WBGene00096430	TRINITY_DN5862_c0_g1_i1.p1	2	56.33	96.1136	98.29	probably fused
WBGene00095949	TRINITY_DN2157_c0_g1_i2.p1	2	56.2	90.3446	72.93	probably fused
WBGene00281588	TRINITY_DN23491_c0_g1_i1.p1	2	56.08	90.3365	51.7	probably fused
WBGene00116506	TRINITY_DN28119_c0_g1_i1.p1	2	56.05	94.8404	76	probably fused
WBGene00099093	TRINITY_DN10776_c0_g1_i1.p1	2	55.81	97.0929	56.6	probably fused
WBGene00111384	TRINITY_DN8779_c0_g1_i2.p1	2	55.79	97.3068	91.11	probably fused
WBGene00102490	TRINITY_DN6095_c0_g1_i1.p1	2	55.59	94.0773	NA	probably fused
WBGene00090921	TRINITY_DN6045_c0_g2_i1.p1	2	55.56	96.4985	50.32	probably fused
WBGene00098810	TRINITY_DN2297_c0_g3_i4.p1	2	55.54	82.9959	97.86	probably fused
WBGene00101640	TRINITY_DN2504_c0_g2_i2.p1	2	55.2	93.6637	47.23	probably fused
WBGene00111258	TRINITY_DN3413_c0_g1_i2.p1	2	55.19	99.0532	NA	probably fused
WBGene00273194	TRINITY_DN673_c0_g2_i3.p1	2	55.14	89.8962	NA	probably fused
WBGene00114837	TRINITY_DN4640_c0_g1_i1.p1	2	55.08	99.2218	98.78	probably fused
WBGene00100782	TRINITY_DN7122_c0_g1_i4.p1	2	55.05	81.7115	26.89	probably fused
WBGene00091313	TRINITY_DN4605_c0_g1_i2.p1	2	54.87	95.9936	90.76	probably fused
WBGene00096839	TRINITY_DN4034_c0_g4_i1.p1	2	54.82	97.0068	40.47	probably fused
WBGene00275453	TRINITY_DN13720_c0_g1_i1.p1	2	54.74	89.0148	77.3	probably fused
WBGene00110657	TRINITY_DN4201_c0_g1_i1.p2	2	54.73	97.0473	64.63	probably fused
WBGene00094703	TRINITY_DN33626_c0_g1_i1.p1	2	54.58	99.1628	61.46	probably fused
WBGene00092092	TRINITY_DN29094_c0_g1_i1.p1	2	54.42	97.4881	97.01	probably fused
WBGene00112025	TRINITY_DN4790_c0_g1_i1.p1	2	54.32	82.4481	100	probably fused
WBGene00280492	TRINITY_DN5244_c0_g1_i1.p1	2	54.3	99.1338	100	probably fused
WBGene00091823	TRINITY_DN3140_c0_g3_i1.p1	2	54.02	98.3846	92.49	probably fused
WBGene00098826	TRINITY_DN10197_c0_g2_i1.p1	2	54.02	95.9341	53.2	probably fused
WBGene00108266	TRINITY_DN368_c0_g2_i1.p1	2	54.01	95.622	100	probably fused
WBGene00100814	TRINITY_DN2884_c0_g1_i1.p1	2	54.01	99.335	93.74	probably fused
WBGene00114862	TRINITY_DN4718_c0_g1_i1.p1	2	53.92	98.5016	85.44	probably fused
WBGene00096046	TRINITY_DN24638_c0_g1_i1.p1	2	53.84	97.0161	29.45	probably fused
WBGene00097770	TRINITY_DN894_c0_g1_i1.p1	2	53.8	99.3427	56.42	probably fused
WBGene00107998	TRINITY_DN12094_c0_g1_i2.p1	2	53.75	81.5166	43.17	probably fused
WBGene00103259	TRINITY_DN12630_c0_g1_i1.p1	2	53.6	98.4164	NA	probably fused
WBGene00092177	TRINITY_DN2083_c0_g1_i1.p1	2	53.6	98.7728	99.75	probably fused
WBGene00107694	TRINITY_DN4112_c0_g1_i1.p1	2	53.57	95.7864	99.12	probably fused
WBGene00277206	TRINITY_DN377_c0_g2_i5.p1	2	53.43	91.0621	47.14	probably fused
WBGene00103726	TRINITY_DN681_c0_g1_i1.p1	2	53.4	91.4506	100	probably fused
WBGene00102056	TRINITY_DN855_c0_g1_i1.p1	2	53.37	99.6136	98.94	probably fused
WBGene00104635	TRINITY_DN33695_c0_g1_i1.p1	2	53.36	97.1333	98.8	probably fused
WBGene00106802	TRINITY_DN1073_c0_g1_i1.p1	2	53.24	97.77	98.11	probably fused
WBGene00097726	TRINITY_DN28925_c0_g1_i1.p1	2	53.2	97.8172	100	probably fused
WBGene00096286	TRINITY_DN6880_c1_g2_i2.p1	2	53.18	95.5979	89.17	probably fused
WBGene00109749	TRINITY_DN2021_c0_g1_i3.p1	2	53.14	80.3207	90.26	probably fused
WBGene00103896	TRINITY_DN17480_c0_g1_i1.p1	2	53.11	97.123	98.38	probably fused
WBGene00277393	TRINITY_DN6484_c0_g1_i2.p1	2	53.1	98.4126	86.84	probably fused
WBGene00096629	TRINITY_DN17486_c0_g2_i1.p1	2	53.04	96.9859	50.77	probably fused
WBGene00284793	TRINITY_DN27467_c0_g1_i1.p1	2	53	99.0973	95.73	probably fused
WBGene00113298	TRINITY_DN2098_c0_g1_i4.p1	2	52.9	96.2978	93.62	probably fused
WBGene00205807	TRINITY_DN5123_c0_g4_i1.p1	2	52.84	94.8224	42.63	probably fused
WBGene00281126	TRINITY_DN6848_c0_g1_i1.p1	2	52.81	97.4459	99.43	probably fused
WBGene00278534	TRINITY_DN25022_c0_g1_i1.p1	2	52.75	96.7533	98.46	probably fused
WBGene00103561	TRINITY_DN9802_c0_g2_i1.p1	2	52.74	94.2302	51.19	probably fused
WBGene00116892	TRINITY_DN24804_c0_g1_i1.p1	2	52.64	98.5825	99.32	probably fused
WBGene00098701	TRINITY_DN7647_c2_g1_i1.p1	2	52.63	97.714	84.8	probably fused
WBGene00099925	TRINITY_DN3817_c0_g1_i1.p1	2	52.52	97.5711	94.74	probably fused
WBGene00095320	TRINITY_DN31412_c0_g1_i1.p1	2	52.49	93.9855	91.09	probably fused
WBGene00109386	TRINITY_DN26816_c0_g1_i1.p1	2	52.37	99.1428	24.69	probably fused
WBGene00272273	TRINITY_DN2969_c0_g1_i2.p1	2	52.36	98.7434	98.51	probably fused
WBGene00111319	TRINITY_DN8793_c0_g1_i1.p1	2	52.36	99.2401	66.32	probably fused
WBGene00110090	TRINITY_DN9517_c0_g2_i1.p1	2	52.33	98.7885	92.54	probably fused
WBGene00111532	TRINITY_DN13432_c0_g1_i1.p1	2	52.31	98.7007	82.43	probably fused
WBGene00096064	TRINITY_DN4005_c0_g1_i2.p1	2	52.26	99.3583	72.83	probably fused
WBGene00113337	TRINITY_DN1855_c0_g1_i1.p1	2	52.25	99.3025	95.98	probably fused
WBGene00109401	TRINITY_DN3502_c0_g1_i1.p1	2	52.23	99.1115	87.28	probably fused
WBGene00097691	TRINITY_DN1152_c0_g1_i1.p1	2	52.21	97.6654	39.77	probably fused
WBGene00108491	TRINITY_DN3371_c0_g1_i1.p1	2	52.15	98.6796	59.15	probably fused
WBGene00107155	TRINITY_DN27330_c0_g1_i1.p1	2	52.06	99.1995	100	probably fused
WBGene00275496	TRINITY_DN370_c0_g2_i1.p2	2	52.04	97.6475	99.36	probably fused
WBGene00090741	TRINITY_DN24428_c0_g1_i1.p1	2	51.94	98.4957	NA	probably fused
WBGene00281695	TRINITY_DN285_c0_g2_i1.p1	2	51.89	97.9481	99.63	probably fused
WBGene00091782	TRINITY_DN4863_c0_g1_i1.p1	2	51.88	98.1509	97.55	probably fused
WBGene00094558	TRINITY_DN5273_c0_g1_i1.p1	2	51.88	96.5475	72.69	probably fused
WBGene00114520	TRINITY_DN8117_c0_g1_i1.p1	2	51.82	97.2778	97.34	probably fused
WBGene00092864	TRINITY_DN4204_c0_g1_i1.p1	2	51.78	99.1449	89.34	probably fused
WBGene00204834	TRINITY_DN512_c0_g1_i1.p1	2	51.71	96.5172	96.26	probably fused
WBGene00090264	TRINITY_DN23499_c0_g1_i1.p1	2	51.66	97.181	97.57	probably fused
WBGene00109550	TRINITY_DN6750_c0_g2_i2.p1	2	51.56	94.6424	NA	probably fused
WBGene00203887	TRINITY_DN6460_c0_g1_i1.p1	2	51.55	99.3258	100	probably fused
WBGene00276326	TRINITY_DN161_c0_g1_i5.p1	2	51.42	84.5914	89.06	probably fused
WBGene00100877	TRINITY_DN28971_c0_g1_i1.p1	2	51.39	98.981	99.3	probably fused
WBGene00109369	TRINITY_DN454_c0_g1_i1.p1	2	51.34	93.9255	87.61	probably fused
WBGene00110421	TRINITY_DN29040_c0_g1_i1.p1	2	51.31	97.9984	100	probably fused
WBGene00117229	TRINITY_DN3625_c0_g1_i1.p1	2	51.22	94.1523	NA	probably fused
WBGene00104539	TRINITY_DN22345_c0_g1_i1.p1	2	51.18	97.8314	92.65	probably fused
WBGene00280344	TRINITY_DN8736_c0_g1_i1.p1	2	51.15	98.7845	96.93	probably fused
WBGene00089682	TRINITY_DN12202_c0_g3_i1.p1	2	51.13	96.7063	86.53	probably fused
WBGene00202733	TRINITY_DN2926_c0_g1_i1.p1	2	51.09	97.594	80.77	probably fused
WBGene00092106	TRINITY_DN4194_c0_g1_i1.p1	2	51.08	98.0749	35.66	probably fused
WBGene00116829	TRINITY_DN616_c0_g1_i1.p1	2	51.07	98.8998	93.36	probably fused
WBGene00118285	TRINITY_DN2991_c0_g1_i1.p1	2	51.03	99.4481	98.26	probably fused
WBGene00279252	TRINITY_DN33459_c0_g1_i1.p1	2	50.89	98.1275	99.28	probably fused
WBGene00093801	TRINITY_DN11000_c0_g1_i1.p1	2	50.77	99.1832	94.08	probably fused
WBGene00095187	TRINITY_DN3937_c0_g1_i1.p1	2	50.73	98.5247	92.57	probably fused
WBGene00103395	TRINITY_DN3841_c0_g1_i3.p1	2	50.66	98.3426	97.33	probably fused
WBGene00203499	TRINITY_DN780_c0_g1_i3.p2	2	50.61	90.4281	56.99	probably fused
WBGene00102740	TRINITY_DN6430_c0_g1_i1.p1	2	50.51	97.4071	70.15	probably fused
WBGene00281695	TRINITY_DN285_c0_g1_i1.p1	2	50.5	91.9277	99.63	probably fused
WBGene00112519	TRINITY_DN5860_c0_g1_i1.p1	2	50.46	99.3707	93.52	probably fused
WBGene00102041	TRINITY_DN5680_c0_g1_i2.p1	2	50.46	89.7183	86.79	probably fused
WBGene00103505	TRINITY_DN3138_c0_g2_i2.p1	2	50.45	98.305	28.63	probably fused
WBGene00106112	TRINITY_DN2772_c0_g1_i2.p1	2	50.44	98.7423	97.09	probably fused
WBGene00116986	TRINITY_DN11889_c0_g3_i1.p1	2	50.37	98.533	97.2	probably fused
WBGene00103819	TRINITY_DN6903_c0_g1_i1.p1	2	50.36	99.4755	94.62	probably fused
WBGene00103729	TRINITY_DN24856_c0_g1_i1.p1	2	50.36	98.7394	93.32	probably fused
WBGene00091797	TRINITY_DN1957_c0_g1_i1.p1	2	50.36	87.1651	48.08	probably fused
WBGene00116829	TRINITY_DN292_c0_g1_i1.p1	2	50.27	99.8013	97.28	probably fused
WBGene00104966	TRINITY_DN2717_c0_g1_i1.p1	2	50.21	99.4856	95.16	probably fused
WBGene00109435	TRINITY_DN2569_c0_g1_i1.p1	2	50.2	98.307	NA	probably fused
WBGene00282730	TRINITY_DN2972_c0_g1_i1.p1	2	50.19	96.8388	50.29	probably fused
WBGene00093787	TRINITY_DN1894_c0_g3_i4.p1	2	50.08	97.8968	95.01	probably fused
WBGene00107203	TRINITY_DN2559_c0_g1_i1.p1	2	50	98.4393	100	probably fused
WBGene00093801	TRINITY_DN4511_c0_g1_i1.p1	2	50	99.1993	93.58	probably fused
WBGene00282730	TRINITY_DN4138_c0_g1_i3.p1	2	50	97.5127	49.9	probably fused
WBGene00204275	TRINITY_DN7399_c0_g1_i1.p1	2	50	98.8001	35.88	probably fused
WBGene00094878	TRINITY_DN4312_c0_g1_i2.p1	2	49.97	88.6946	48.08	probably fused
WBGene00093787	TRINITY_DN1894_c0_g3_i3.p1	2	49.92	96.0793	95.2	probably fused
WBGene00096541	TRINITY_DN24680_c0_g1_i1.p1	2	49.69	99.4602	99.12	probably fused
WBGene00089682	TRINITY_DN3204_c0_g1_i2.p1	2	49.68	98.5552	84.51	probably fused
WBGene00116986	TRINITY_DN3933_c0_g2_i2.p1	2	49.63	98.6246	88.16	probably fused
WBGene00097490	TRINITY_DN10184_c1_g1_i1.p1	2	49.58	90.0383	NA	probably fused
WBGene00102740	TRINITY_DN5530_c0_g1_i1.p1	2	49.54	98.8737	70.06	probably fused
WBGene00277617	TRINITY_DN16534_c0_g1_i6.p1	2	49.54	89.0158	64.99	probably fused
WBGene00275446	TRINITY_DN2170_c0_g3_i3.p1	2	49.53	97.3719	99.4	probably fused
WBGene00101864	TRINITY_DN3216_c0_g1_i1.p1	2	49.48	98.5818	NA	probably fused
WBGene00107155	TRINITY_DN3771_c0_g1_i3.p1	2	49.48	99.6734	100	probably fused
WBGene00103819	TRINITY_DN664_c0_g1_i1.p1	2	49.45	98.4083	94.62	probably fused
WBGene00118289	TRINITY_DN23562_c0_g1_i1.p1	2	49.45	97.1651	92.98	probably fused
WBGene00096541	TRINITY_DN5952_c0_g2_i1.p1	2	49.43	96.2368	99.47	probably fused
WBGene00099966	TRINITY_DN481_c0_g1_i1.p1	2	49.38	95.9702	93.12	probably fused
WBGene00107185	TRINITY_DN2909_c0_g2_i1.p2	2	49.34	94.9263	100	probably fused
WBGene00276674	TRINITY_DN1449_c0_g2_i1.p1	2	49.34	98.1757	29.04	probably fused
WBGene00276326	TRINITY_DN455_c1_g1_i1.p1	2	49.29	96.7254	89.01	probably fused
WBGene00117207	TRINITY_DN6588_c0_g2_i2.p1	2	49.25	92.0199	98.45	probably fused
WBGene00118273	TRINITY_DN1370_c0_g1_i3.p1	2	49.18	99.5095	100	probably fused
WBGene00100877	TRINITY_DN54_c0_g1_i2.p1	2	49.14	97.9721	97.55	probably fused
WBGene00102115	TRINITY_DN11635_c0_g1_i1.p1	2	49.12	96.3533	81	probably fused
WBGene00091419	TRINITY_DN1545_c0_g1_i1.p1	2	49.1	85.5586	76.55	probably fused
WBGene00103562	TRINITY_DN6740_c0_g1_i1.p1	2	49.06	98.5265	NA	probably fused
WBGene00095187	TRINITY_DN31179_c0_g1_i1.p1	2	49.04	96.978	NA	probably fused
WBGene00117229	TRINITY_DN3370_c0_g2_i2.p1	2	48.98	95.1177	98.32	probably fused
WBGene00118341	TRINITY_DN3504_c0_g1_i2.p1	2	48.98	99.0344	72.93	probably fused
WBGene00101327	TRINITY_DN3194_c0_g1_i1.p1	2	48.92	99.4552	71.84	probably fused
WBGene00103670	TRINITY_DN31441_c0_g1_i1.p1	2	48.86	99.5121	96.72	probably fused
WBGene00112356	TRINITY_DN533_c0_g1_i3.p1	2	48.85	93.254	97.14	probably fused
WBGene00278409	TRINITY_DN1928_c0_g2_i1.p1	2	48.81	99.082	99.3	probably fused
WBGene00112058	TRINITY_DN1066_c0_g1_i1.p1	2	48.79	98.4243	92.41	probably fused
WBGene00109550	TRINITY_DN889_c0_g1_i1.p1	2	48.76	98.7053	100	probably fused
WBGene00276674	TRINITY_DN7046_c0_g1_i1.p1	2	48.76	88.1433	12.24	probably fused
WBGene00110638	TRINITY_DN10588_c1_g1_i2.p1	2	48.75	89.9164	NA	probably fused
WBGene00102041	TRINITY_DN6776_c0_g3_i1.p1	2	48.74	98.4885	NA	probably fused
WBGene00100946	TRINITY_DN592_c0_g1_i1.p1	2	48.74	98.3133	99.43	probably fused
WBGene00103729	TRINITY_DN2320_c0_g1_i3.p1	2	48.64	98.0277	98.57	probably fused
WBGene00097490	TRINITY_DN23069_c0_g1_i1.p1	2	48.54	97.7456	40.11	probably fused
WBGene00097708	TRINITY_DN7259_c0_g1_i1.p1	2	48.47	98.7696	92.07	probably fused
WBGene00112058	TRINITY_DN33466_c0_g1_i1.p1	2	48.43	98.5974	97.04	probably fused
WBGene00118285	TRINITY_DN34156_c0_g1_i1.p1	2	48.42	99.2695	85.54	probably fused
WBGene00096465	TRINITY_DN4267_c0_g1_i1.p1	2	48.4	98.6646	95.4	probably fused
WBGene00099925	TRINITY_DN2056_c0_g1_i2.p1	2	48.39	96.6109	97.85	probably fused
WBGene00091989	TRINITY_DN9063_c0_g2_i1.p1	2	48.39	99.5593	53.46	probably fused
WBGene00277753	TRINITY_DN14080_c0_g1_i1.p1	2	48.38	87.8925	86.82	probably fused
WBGene00099611	TRINITY_DN5921_c0_g1_i1.p1	2	48.36	90.4308	98.72	probably fused
WBGene00281265	TRINITY_DN1099_c0_g1_i2.p1	2	48.33	90.4135	99.12	probably fused
WBGene00281265	TRINITY_DN1099_c0_g1_i5.p1	2	48.33	91.5759	99.12	probably fused
WBGene00107203	TRINITY_DN7316_c0_g1_i1.p1	2	48.32	95.9197	94.56	probably fused
WBGene00094878	TRINITY_DN4312_c0_g1_i1.p1	2	48.28	96.9742	48.08	probably fused
WBGene00103670	TRINITY_DN2600_c0_g1_i2.p1	2	48.13	98.2733	86.25	probably fused
WBGene00112935	TRINITY_DN24898_c0_g1_i1.p1	2	48.13	99.184	75.94	probably fused
WBGene00106656	TRINITY_DN2615_c0_g1_i1.p1	2	48.06	99.5747	97.45	probably fused
WBGene00097708	TRINITY_DN3705_c0_g1_i1.p1	2	48.06	98.6056	95.9	probably fused
WBGene00095320	TRINITY_DN11084_c0_g1_i1.p1	2	48.03	96.7318	96.73	probably fused
WBGene00275446	TRINITY_DN2170_c0_g2_i1.p1	2	48	95.4485	99.4	probably fused
WBGene00110657	TRINITY_DN5294_c0_g1_i1.p1	2	47.97	95.3639	100	probably fused
WBGene00109386	TRINITY_DN4257_c0_g1_i1.p1	2	47.93	99.1179	98.6	probably fused
WBGene00109401	TRINITY_DN26748_c0_g1_i1.p1	2	47.85	98.5972	NA	probably fused
WBGene00108491	TRINITY_DN24614_c0_g1_i1.p1	2	47.85	99.0556	92.42	probably fused
WBGene00112365	TRINITY_DN5256_c0_g1_i3.p1	2	47.83	82.1446	99.66	probably fused
WBGene00277617	TRINITY_DN3133_c0_g1_i1.p1	2	47.78	93.9696	NA	probably fused
WBGene00091782	TRINITY_DN9653_c0_g1_i1.p1	2	47.69	99.3392	92.22	probably fused
WBGene00102056	TRINITY_DN855_c0_g3_i1.p1	2	47.67	92.8969	96.81	probably fused
WBGene00102728	TRINITY_DN2671_c0_g1_i1.p1	2	47.67	99.1858	77.06	probably fused
WBGene00272273	TRINITY_DN1166_c0_g1_i1.p1	2	47.64	83.5344	99.23	probably fused
WBGene00116811	TRINITY_DN408_c0_g1_i2.p1	2	47.43	98.8161	85.02	probably fused
WBGene00096629	TRINITY_DN17486_c0_g1_i1.p1	2	47.42	91.3592	45.55	probably fused
WBGene00112359	TRINITY_DN425_c0_g1_i2.p1	2	47.2	98.0181	84.55	probably fused
WBGene00277393	TRINITY_DN2790_c0_g1_i1.p1	2	47.17	98.0038	23.4	probably fused
WBGene00281858	TRINITY_DN5818_c0_g1_i1.p1	2	47.12	97.8455	97.27	probably fused
WBGene00107196	TRINITY_DN5254_c0_g1_i1.p1	2	47.09	97.8605	85.59	probably fused
WBGene00278534	TRINITY_DN10380_c0_g1_i1.p1	2	47.06	99.1564	92.48	probably fused
WBGene00106331	TRINITY_DN10695_c0_g1_i1.p1	2	47.02	98.9457	99.81	probably fused
WBGene00118432	TRINITY_DN6692_c0_g1_i1.p1	2	47.02	97.7382	81.34	probably fused
WBGene00205427	TRINITY_DN5523_c0_g1_i1.p1	2	46.96	93.0335	50.89	probably fused
WBGene00112604	TRINITY_DN14380_c0_g1_i2.p1	2	46.92	98.3832	98.91	probably fused
WBGene00099506	TRINITY_DN7847_c0_g1_i1.p1	2	46.87	96.8001	98.59	probably fused
WBGene00103726	TRINITY_DN681_c0_g2_i1.p1	2	46.86	98.1595	100	probably fused
WBGene00202733	TRINITY_DN15342_c0_g1_i5.p1	2	46.85	94.243	NA	probably fused
WBGene00094344	TRINITY_DN1699_c0_g5_i1.p1	2	46.78	97.5128	94.08	probably fused
WBGene00096465	TRINITY_DN4785_c0_g1_i1.p1	2	46.65	99.0024	98.2	probably fused
WBGene00205807	TRINITY_DN5123_c0_g3_i1.p1	2	46.57	98.6651	43.92	probably fused
WBGene00099480	TRINITY_DN29038_c0_g1_i1.p1	2	46.52	98.2456	47.97	probably fused
WBGene00107694	TRINITY_DN279_c0_g1_i1.p1	2	46.43	97.2905	65.38	probably fused
WBGene00092803	TRINITY_DN26734_c0_g1_i1.p1	2	46.41	99.1012	98.3	probably fused
WBGene00106331	TRINITY_DN7839_c0_g1_i1.p1	2	46.35	98.6277	94.22	probably fused
WBGene00284793	TRINITY_DN602_c0_g1_i1.p1	2	46.3	96.3964	100	probably fused
WBGene00098810	TRINITY_DN2074_c0_g1_i1.p1	2	46.28	86.1341	100	probably fused
WBGene00100814	TRINITY_DN2160_c0_g2_i2.p1	2	46.27	94.4685	96.7	probably fused
WBGene00099611	TRINITY_DN24676_c0_g1_i1.p1	2	46.21	98.3614	97.54	probably fused
WBGene00093710	TRINITY_DN28895_c0_g1_i1.p1	2	46.15	99.1403	98.05	probably fused
WBGene00097666	TRINITY_DN328_c0_g3_i6.p1	2	46.11	97.6908	98.71	probably fused
WBGene00281126	TRINITY_DN16523_c1_g1_i2.p1	2	46.02	97.0031	22.18	probably fused
WBGene00092864	TRINITY_DN4797_c0_g1_i1.p1	2	45.91	98.9316	90.87	probably fused
WBGene00203499	TRINITY_DN6124_c0_g2_i3.p1	2	45.9	99.1248	89.57	probably fused
WBGene00280492	TRINITY_DN542_c0_g1_i1.p1	2	45.86	92.7986	97.18	probably fused
WBGene00104966	TRINITY_DN5127_c0_g1_i1.p1	2	45.83	97.6539	95.31	probably fused
WBGene00101194	TRINITY_DN3288_c0_g1_i2.p1	2	45.74	88.7433	99.92	probably fused
WBGene00098701	TRINITY_DN27252_c0_g1_i1.p1	2	45.69	99.0765	98.34	probably fused
WBGene00104079	TRINITY_DN5123_c0_g1_i4.p1	2	45.68	90.8064	22.29	probably fused
WBGene00104635	TRINITY_DN2333_c0_g1_i1.p1	2	45.54	94.7607	92.51	probably fused
WBGene00096231	TRINITY_DN1434_c0_g1_i1.p1	2	45.48	98.3281	100	probably fused
WBGene00278620	TRINITY_DN31144_c0_g1_i1.p1	2	45.34	97.189	100	probably fused
WBGene00097537	TRINITY_DN14865_c0_g1_i1.p1	2	45.31	98.5577	61.76	probably fused
WBGene00102318	TRINITY_DN15883_c0_g1_i1.p1	2	45.31	89.8035	17.14	probably fused
WBGene00111532	TRINITY_DN4646_c0_g1_i2.p1	2	45.23	94.8892	83.38	probably fused
WBGene00103899	TRINITY_DN2801_c0_g1_i3.p1	2	45.19	97.0316	77.29	probably fused
WBGene00092177	TRINITY_DN26688_c0_g1_i1.p1	2	45.18	99.4198	99.69	probably fused
WBGene00095833	TRINITY_DN4602_c0_g1_i1.p1	2	45.06	89.5618	72.95	probably fused
WBGene00111258	TRINITY_DN24667_c0_g1_i1.p1	2	45.04	98.5551	NA	probably fused
WBGene00097754	TRINITY_DN912_c0_g1_i1.p1	2	45.04	97.4576	98.77	probably fused
WBGene00109369	TRINITY_DN3506_c0_g1_i1.p1	2	44.99	96.1882	84.62	probably fused
WBGene00106570	TRINITY_DN19542_c0_g1_i1.p1	2	44.99	87.2547	41.11	probably fused
WBGene00114837	TRINITY_DN3313_c0_g1_i1.p1	2	44.92	98.8099	87.37	probably fused
WBGene00092111	TRINITY_DN2154_c0_g1_i1.p1	2	44.9	97.7712	93.47	probably fused
WBGene00097691	TRINITY_DN9317_c0_g1_i1.p1	2	44.88	98.9132	100	probably fused
WBGene00281510	TRINITY_DN4734_c0_g1_i1.p1	2	44.83	97.0346	96.3	probably fused
WBGene00116892	TRINITY_DN24697_c0_g1_i1.p1	2	44.81	98.2766	100	probably fused
WBGene00272031	TRINITY_DN6575_c0_g1_i1.p1	2	44.76	95.3406	100	probably fused
WBGene00090921	TRINITY_DN6045_c0_g3_i1.p2	2	44.73	92.705	43.17	probably fused
WBGene00110421	TRINITY_DN932_c0_g1_i1.p1	2	44.63	94.6962	97.62	probably fused
WBGene00096064	TRINITY_DN7561_c0_g1_i1.p1	2	44.59	99.1438	99.82	probably fused
WBGene00203887	TRINITY_DN494_c0_g1_i1.p1	2	44.57	96.835	68.94	probably fused
WBGene00100304	TRINITY_DN812_c0_g1_i1.p1	2	44.57	83.8502	22.3	probably fused
WBGene00094879	TRINITY_DN17807_c0_g4_i1.p1	2	44.49	96.6846	92.31	probably fused
WBGene00281858	TRINITY_DN29242_c0_g1_i1.p1	2	44.36	98.8527	88.32	probably fused
WBGene00096980	TRINITY_DN5969_c0_g1_i1.p1	2	44.35	98.8819	34.22	probably fused
WBGene00112292	TRINITY_DN8_c0_g1_i2.p1	2	44.32	84.6789	71.49	probably fused
WBGene00099914	TRINITY_DN1735_c0_g1_i3.p1	2	44.27	99.1449	99.42	probably fused
WBGene00271988	TRINITY_DN29188_c0_g1_i1.p1	2	44.15	99.1728	92.7	probably fused
WBGene00281510	TRINITY_DN9248_c0_g2_i2.p1	2	44.02	95.5363	85.41	probably fused
WBGene00110230	TRINITY_DN962_c0_g1_i2.p1	2	43.99	98.9965	94.72	probably fused
WBGene00111384	TRINITY_DN3645_c0_g1_i2.p1	2	43.93	99.1117	NA	probably fused
WBGene00097990	TRINITY_DN8650_c0_g1_i1.p1	2	43.65	93.4842	94.05	probably fused
WBGene00115057	TRINITY_DN4708_c0_g1_i1.p1	2	43.63	98.7909	94.37	probably fused
WBGene00098131	TRINITY_DN1962_c0_g1_i1.p1	2	43.6	97.6674	99.84	probably fused
WBGene00115104	TRINITY_DN9875_c0_g1_i1.p1	2	43.57	98.8808	98.78	probably fused
WBGene00103700	TRINITY_DN33613_c0_g1_i1.p1	2	43.51	99.1771	96.9	probably fused
WBGene00271988	TRINITY_DN24488_c0_g1_i1.p1	2	43.49	98.8005	100	probably fused
WBGene00112028	TRINITY_DN1636_c0_g1_i3.p1	2	43.38	97.7428	100	probably fused
WBGene00118432	TRINITY_DN3024_c0_g1_i2.p1	2	43.32	89.7806	76.27	probably fused
WBGene00272487	TRINITY_DN10229_c0_g1_i1.p1	2	43.24	91.6702	27.03	probably fused
WBGene00103259	TRINITY_DN31702_c0_g1_i1.p1	2	43.23	98.6518	96.84	probably fused
WBGene00111091	TRINITY_DN1894_c0_g2_i2.p1	2	43.17	94.0011	96.15	probably fused
WBGene00113298	TRINITY_DN2098_c0_g1_i1.p1	2	43.1	90.5351	92.93	probably fused
WBGene00101640	TRINITY_DN12436_c0_g1_i3.p1	2	43.04	94.8403	96.48	probably fused
WBGene00092092	TRINITY_DN684_c0_g2_i1.p1	2	43.03	98.2011	100	probably fused
WBGene00114284	TRINITY_DN1861_c0_g1_i7.p1	2	43.01	95.8329	70.55	probably fused
WBGene00273349	TRINITY_DN31411_c0_g1_i1.p1	2	42.89	98.5022	99.61	probably fused
WBGene00272181	TRINITY_DN6961_c0_g1_i1.p1	2	42.73	93.645	75.37	probably fused
WBGene00109850	TRINITY_DN53_c0_g1_i1.p1	2	42.66	89.2176	96.47	probably fused
WBGene00091853	TRINITY_DN1219_c0_g1_i2.p1	2	42.58	95.5414	87.17	probably fused
WBGene00097537	TRINITY_DN1862_c0_g1_i1.p1	2	42.54	97.2224	63.45	probably fused
WBGene00107185	TRINITY_DN5330_c0_g1_i1.p1	2	42.5	90.6076	94.17	probably fused
WBGene00116811	TRINITY_DN4757_c0_g1_i1.p1	2	42.3	98.2648	81.62	probably fused
WBGene00103256	TRINITY_DN2354_c0_g1_i1.p1	2	42.29	95.517	98.69	probably fused
WBGene00091853	TRINITY_DN27487_c0_g1_i1.p1	2	42.27	97.7608	100	probably fused
WBGene00102177	TRINITY_DN11174_c0_g1_i3.p1	2	42.21	95.193	100	probably fused
WBGene00110090	TRINITY_DN449_c0_g2_i1.p1	2	42.09	98.991	97.33	probably fused
WBGene00114548	TRINITY_DN4060_c0_g1_i3.p1	2	42.01	80.6339	40.28	probably fused
WBGene00272207	TRINITY_DN12099_c0_g1_i1.p1	2	41.95	94.2885	42.82	probably fused
WBGene00103629	TRINITY_DN2310_c0_g1_i1.p1	2	41.86	99.0535	100	probably fused
WBGene00112292	TRINITY_DN1811_c1_g1_i1.p1	2	41.82	94.2306	NA	probably fused
WBGene00116655	TRINITY_DN11220_c0_g2_i1.p1	2	41.81	98.2151	99.74	probably fused
WBGene00112359	TRINITY_DN458_c0_g1_i2.p1	2	41.8	82.108	99.32	probably fused
WBGene00275496	TRINITY_DN370_c0_g1_i1.p1	2	41.76	89.2825	98.33	probably fused
WBGene00116771	TRINITY_DN5097_c0_g2_i1.p1	2	41.7	93.9806	92.84	probably fused
WBGene00105521	TRINITY_DN5396_c0_g1_i1.p1	2	41.7	98.2037	90.39	probably fused
WBGene00105770	TRINITY_DN11270_c0_g1_i1.p2	2	41.45	99.0245	97.96	probably fused
WBGene00117518	TRINITY_DN8253_c0_g1_i1.p1	2	41.4	98.8433	89.91	probably fused
WBGene00114520	TRINITY_DN4590_c0_g2_i2.p1	2	41.36	98.2056	89.05	probably fused
WBGene00095779	TRINITY_DN34204_c0_g1_i1.p1	2	41.25	93.2464	36.41	probably fused
WBGene00280550	TRINITY_DN18636_c0_g1_i2.p1	2	41.16	93.4009	97.53	probably fused
WBGene00111091	TRINITY_DN1894_c0_g1_i2.p1	2	41.1	88.4731	98.58	probably fused
WBGene00278275	TRINITY_DN866_c0_g1_i3.p1	2	41.06	97.8922	23.96	probably fused
WBGene00092850	TRINITY_DN9079_c0_g1_i1.p1	2	41.05	93.6481	NA	probably fused
WBGene00118077	TRINITY_DN13443_c0_g1_i1.p1	2	40.96	98.2252	99.03	probably fused
WBGene00114723	TRINITY_DN83_c0_g3_i2.p1	2	40.85	99.105	99.79	probably fused
WBGene00108891	TRINITY_DN957_c0_g5_i1.p1	2	40.83	97.9817	99.46	probably fused
WBGene00109461	TRINITY_DN32128_c0_g1_i1.p1	2	40.81	96.6985	99	probably fused
WBGene00100815	TRINITY_DN6052_c0_g1_i1.p1	2	40.78	99.3679	100	probably fused
WBGene00277970	TRINITY_DN3016_c0_g1_i2.p1	2	40.71	88.7279	93.86	probably fused
WBGene00093288	TRINITY_DN2158_c0_g3_i1.p1	2	40.69	97.7008	84.26	probably fused
WBGene00116394	TRINITY_DN31794_c0_g1_i1.p1	2	40.66	98.9618	93.1	probably fused
WBGene00272207	TRINITY_DN3396_c0_g1_i1.p1	2	40.64	92.9342	NA	probably fused
WBGene00090864	TRINITY_DN165_c1_g2_i3.p1	2	40.62	97.0529	97.57	probably fused
WBGene00108351	TRINITY_DN21639_c0_g1_i1.p1	2	40.58	98.4362	37.65	probably fused
WBGene00204255	TRINITY_DN27100_c0_g1_i1.p1	2	40.52	99.2246	99.74	probably fused
WBGene00116845	TRINITY_DN7558_c0_g2_i1.p1	2	40.52	96.6685	87.38	probably fused
WBGene00276133	TRINITY_DN5838_c0_g1_i1.p1	2	40.39	98.5868	95.53	probably fused
WBGene00115097	TRINITY_DN5585_c0_g1_i2.p1	2	40.36	82.9918	99.57	probably fused
WBGene00104483	TRINITY_DN33901_c0_g1_i1.p1	2	40.35	99.2965	98.72	probably fused
WBGene00111892	TRINITY_DN3956_c0_g1_i2.p1	2	40.35	91.0429	90.23	probably fused
WBGene00096839	TRINITY_DN5577_c0_g1_i3.p1	2	40.33	99.055	93.43	probably fused
WBGene00094558	TRINITY_DN29122_c0_g1_i1.p1	2	40.32	98.735	74.13	probably fused
WBGene00103958	TRINITY_DN8230_c0_g1_i1.p1	2	40.17	97.904	53	probably fused
WBGene00095039	TRINITY_DN1902_c0_g1_i1.p1	2	40.01	99.333	99.73	probably fused
WBGene00103562	TRINITY_DN5121_c0_g1_i3.p1	2	40	98.6575	91.07	probably fused
WBGene00098915	TRINITY_DN22207_c0_g1_i2.p1	2	39.9	87.1639	62.39	probably fused
WBGene00110230	TRINITY_DN962_c0_g1_i5.p1	2	39.87	83.1989	NA	probably fused
WBGene00096037	TRINITY_DN4699_c0_g1_i1.p1	2	39.85	98.2787	95.37	probably fused
WBGene00112329	TRINITY_DN33754_c0_g1_i1.p1	2	39.8	99.1448	97.65	probably fused
WBGene00109461	TRINITY_DN3387_c0_g1_i1.p1	2	39.73	96.7916	100	probably fused
WBGene00107194	TRINITY_DN9702_c0_g1_i1.p1	2	39.67	95.1761	89.97	probably fused
WBGene00272487	TRINITY_DN29429_c0_g1_i1.p1	2	39.62	99.1688	36.07	probably fused
WBGene00097770	TRINITY_DN5229_c0_g1_i1.p1	2	39.6	98.3866	95.93	probably fused
WBGene00103505	TRINITY_DN3507_c0_g1_i1.p1	2	39.57	91.8936	89.44	probably fused
WBGene00116655	TRINITY_DN670_c0_g1_i1.p1	2	39.55	97.4248	96.2	probably fused
WBGene00102490	TRINITY_DN10443_c0_g1_i2.p1	2	39.53	98.6354	NA	probably fused
WBGene00114705	TRINITY_DN2202_c0_g1_i2.p1	2	39.5	98.9765	100	probably fused
WBGene00097754	TRINITY_DN24887_c0_g1_i1.p1	2	39.46	99.3302	95.77	probably fused
WBGene00111365	TRINITY_DN873_c0_g1_i4.p1	2	39.41	97.9117	99.3	probably fused
WBGene00106334	TRINITY_DN27380_c0_g1_i1.p1	2	39.39	97.7344	98.65	probably fused
WBGene00108318	TRINITY_DN5465_c0_g1_i2.p1	2	39.34	97.6404	97.97	probably fused
WBGene00273248	TRINITY_DN21598_c0_g1_i1.p1	2	39.31	98.6597	NA	probably fused
WBGene00272955	TRINITY_DN13077_c0_g1_i1.p1	2	39.31	96.8652	94.29	probably fused
WBGene00115957	TRINITY_DN2802_c0_g4_i1.p1	2	39.3	98.9285	NA	probably fused
WBGene00092850	TRINITY_DN2111_c0_g2_i8.p1	2	39.15	86.4385	NA	probably fused
WBGene00097987	TRINITY_DN367_c0_g1_i5.p1	2	39.15	81.9372	97.77	probably fused
WBGene00106177	TRINITY_DN21600_c0_g1_i1.p1	2	39.13	97.7099	24.76	probably fused
WBGene00108059	TRINITY_DN91_c0_g1_i2.p1	2	39.08	92.8404	91.89	probably fused
WBGene00107414	TRINITY_DN3435_c0_g1_i3.p1	2	39.06	98.4014	34.91	probably fused
WBGene00273349	TRINITY_DN1285_c0_g1_i1.p1	2	39.03	96.4757	86.6	probably fused
WBGene00093288	TRINITY_DN2158_c0_g1_i1.p1	2	39.01	90.7151	95.62	probably fused
WBGene00118086	TRINITY_DN1770_c0_g1_i2.p1	2	38.95	98.8232	100	probably fused
WBGene00091419	TRINITY_DN2415_c0_g1_i1.p1	2	38.92	94.4084	99.65	probably fused
WBGene00106802	TRINITY_DN20811_c0_g1_i1.p1	2	38.88	97.6276	95.85	probably fused
WBGene00096430	TRINITY_DN5347_c0_g1_i2.p1	2	38.81	97.2467	NA	probably fused
WBGene00096244	TRINITY_DN586_c0_g1_i1.p1	2	38.78	97.2696	54.26	probably fused
WBGene00111553	TRINITY_DN12534_c0_g1_i1.p1	2	38.73	96.5201	98.65	probably fused
WBGene00103051	TRINITY_DN603_c0_g1_i1.p1	2	38.71	95.2322	80.99	probably fused
WBGene00272695	TRINITY_DN6054_c1_g4_i2.p1	2	38.68	88.6343	91.49	probably fused
WBGene00116965	TRINITY_DN2594_c0_g1_i2.p1	2	38.63	95.01	91.24	probably fused
WBGene00107563	TRINITY_DN4382_c0_g1_i5.p1	2	38.62	87.5992	99.62	probably fused
WBGene00091313	TRINITY_DN14351_c0_g1_i1.p1	2	38.54	89.5325	79.8	probably fused
WBGene00114491	TRINITY_DN5665_c0_g1_i1.p1	2	38.52	95.5003	99.39	probably fused
WBGene00099917	TRINITY_DN1206_c0_g1_i1.p1	2	38.47	97.8253	53.51	probably fused
WBGene00111386	TRINITY_DN3245_c0_g3_i2.p1	2	38.44	92.5448	97.44	probably fused
WBGene00103051	TRINITY_DN12895_c0_g1_i1.p1	2	38.42	96.572	82.89	probably fused
WBGene00099965	TRINITY_DN7299_c0_g2_i1.p1	2	38.34	89.0158	47.54	probably fused
WBGene00099966	TRINITY_DN7299_c0_g2_i1.p1	2	38.34	89.0158	47.54	probably fused
WBGene00276011	TRINITY_DN5020_c0_g2_i1.p1	2	38.29	99.0846	47.72	probably fused
WBGene00118717	TRINITY_DN3357_c0_g1_i1.p1	2	38.27	98.7408	NA	probably fused
WBGene00111396	TRINITY_DN4418_c0_g1_i1.p1	2	38.27	98.8925	98.56	probably fused
WBGene00110514	TRINITY_DN1620_c0_g1_i1.p1	2	38.01	96.8751	99.74	probably fused
WBGene00117789	TRINITY_DN26746_c0_g1_i1.p1	2	38	98.3248	35.95	probably fused
WBGene00275453	TRINITY_DN5158_c0_g1_i1.p1	2	37.91	88.4471	NA	probably fused
WBGene00101974	TRINITY_DN1211_c0_g1_i1.p1	2	37.86	98.177	82.76	probably fused
WBGene00103988	TRINITY_DN2879_c0_g3_i2.p1	2	37.84	94.5628	46.01	probably fused
WBGene00280223	TRINITY_DN6044_c1_g3_i1.p1	2	37.81	98.152	85.49	probably fused
WBGene00089943	TRINITY_DN2556_c0_g2_i2.p1	2	37.75	89.3672	NA	probably fused
WBGene00117849	TRINITY_DN27012_c0_g1_i1.p1	2	37.75	96.4945	100	probably fused
WBGene00102246	TRINITY_DN31624_c0_g1_i1.p1	2	37.65	98.09	NA	probably fused
WBGene00103896	TRINITY_DN7272_c0_g1_i1.p1	2	37.57	86.9451	92.76	probably fused
WBGene00116845	TRINITY_DN16504_c1_g1_i4.p1	2	37.56	92.8961	73.91	probably fused
WBGene00273289	TRINITY_DN11389_c0_g1_i2.p1	2	37.52	97.1069	41.73	probably fused
WBGene00278206	TRINITY_DN31210_c0_g1_i1.p1	2	37.49	95.3826	25.19	probably fused
WBGene00112604	TRINITY_DN2599_c0_g4_i3.p1	2	37.4	97.1447	95.85	probably fused
WBGene00096009	TRINITY_DN20355_c1_g1_i1.p1	2	37.39	90.0801	NA	probably fused
WBGene00095190	TRINITY_DN701_c0_g6_i1.p2	2	37.36	84.8723	54.47	probably fused
WBGene00104799	TRINITY_DN16_c0_g1_i1.p1	2	37.34	98.9263	88.01	probably fused
WBGene00112935	TRINITY_DN164_c0_g1_i2.p1	2	37.29	94.8153	63.77	probably fused
WBGene00103117	TRINITY_DN6181_c0_g1_i1.p1	2	37.23	97.6509	100	probably fused
WBGene00096513	TRINITY_DN4830_c0_g1_i2.p1	2	37.14	97.1086	99.36	probably fused
WBGene00090879	TRINITY_DN6699_c0_g2_i1.p1	2	36.96	81.3542	49.81	probably fused
WBGene00107972	TRINITY_DN8239_c0_g1_i4.p1	2	36.95	94.8451	57.4	probably fused
WBGene00110599	TRINITY_DN3845_c2_g3_i3.p1	2	36.95	88.6057	32.62	probably fused
WBGene00107673	TRINITY_DN5138_c0_g2_i1.p1	2	36.92	84.7107	43.97	probably fused
WBGene00277206	TRINITY_DN29539_c0_g1_i1.p1	2	36.84	98.4856	68.66	probably fused
WBGene00097154	TRINITY_DN270_c0_g1_i1.p1	2	36.79	92.9971	NA	probably fused
WBGene00110002	TRINITY_DN3171_c0_g2_i1.p1	2	36.79	96.7618	91.03	probably fused
WBGene00202649	TRINITY_DN6083_c0_g1_i1.p1	2	36.73	99.8267	98.91	probably fused
WBGene00095271	TRINITY_DN7363_c0_g1_i1.p1	2	36.73	96.7724	32.78	probably fused
WBGene00098713	TRINITY_DN31401_c1_g1_i1.p1	2	36.68	97.8055	24.5	probably fused
WBGene00111386	TRINITY_DN7118_c0_g1_i1.p1	2	36.58	99.4672	76.27	probably fused
WBGene00093710	TRINITY_DN2388_c0_g2_i1.p1	2	36.5	98.5992	99.38	probably fused
WBGene00103651	TRINITY_DN339_c0_g1_i5.p1	2	36.46	96.9125	45.71	probably fused
WBGene00278351	TRINITY_DN13181_c0_g1_i2.p1	2	36.43	92.8338	94.21	probably fused
WBGene00098594	TRINITY_DN2715_c0_g1_i1.p1	2	36.39	98.1837	89.38	probably fused
WBGene00113209	TRINITY_DN9666_c0_g1_i3.p1	2	36.35	81.4432	53.37	probably fused
WBGene00099093	TRINITY_DN4031_c0_g1_i2.p1	2	36.33	97.4394	83.12	probably fused
WBGene00117207	TRINITY_DN24792_c0_g1_i1.p1	2	36.21	99.5648	86.5	probably fused
WBGene00103561	TRINITY_DN9802_c0_g1_i1.p1	2	35.97	95.9218	NA	probably fused
WBGene00273094	TRINITY_DN8316_c0_g1_i2.p1	2	35.95	92.9088	54.04	probably fused
WBGene00096005	TRINITY_DN1040_c0_g1_i1.p1	2	35.84	96.4006	92.68	probably fused
WBGene00272236	TRINITY_DN27897_c0_g1_i1.p2	2	35.74	90.4356	34.13	probably fused
WBGene00278834	TRINITY_DN5588_c0_g1_i2.p2	2	35.73	85.9184	27.53	probably fused
WBGene00096039	TRINITY_DN1444_c0_g3_i1.p1	2	35.69	98.2423	98.94	probably fused
WBGene00107375	TRINITY_DN3977_c0_g1_i1.p1	2	35.33	98.1997	79.45	probably fused
WBGene00110799	TRINITY_DN5980_c0_g1_i1.p1	2	35.3	95.9533	NA	probably fused
WBGene00096469	TRINITY_DN13881_c0_g1_i2.p1	2	35.27	91.5462	39.47	probably fused
WBGene00092792	TRINITY_DN6886_c0_g2_i2.p1	2	35.19	98.4856	86.13	probably fused
WBGene00279203	TRINITY_DN5384_c0_g1_i1.p1	2	35.17	97.9753	85.67	probably fused
WBGene00105230	TRINITY_DN12523_c0_g1_i1.p1	2	35.13	98.9141	98.01	probably fused
WBGene00104799	TRINITY_DN28905_c0_g1_i1.p1	2	35.11	99.7247	48.61	probably fused
WBGene00272641	TRINITY_DN1691_c0_g1_i1.p1	2	35.09	93.8271	59.83	probably fused
WBGene00100979	TRINITY_DN606_c1_g1_i1.p1	2	35.04	98.0188	95.64	probably fused
WBGene00204834	TRINITY_DN2219_c0_g1_i3.p1	2	35.02	98.7164	100	probably fused
WBGene00092372	TRINITY_DN24838_c0_g1_i1.p1	2	34.91	99.2123	97.43	probably fused
WBGene00090973	TRINITY_DN2184_c0_g1_i1.p1	2	34.87	98.4887	95.93	probably fused
WBGene00112312	TRINITY_DN5925_c0_g1_i1.p1	2	34.83	97.7289	100	probably fused
WBGene00116299	TRINITY_DN5088_c0_g1_i2.p1	2	34.76	95.6333	90.14	probably fused
WBGene00279203	TRINITY_DN7717_c0_g1_i1.p1	2	34.76	97.3999	88.11	probably fused
WBGene00102246	TRINITY_DN741_c0_g1_i2.p1	2	34.73	97.6567	97.81	probably fused
WBGene00118327	TRINITY_DN391_c0_g1_i2.p1	2	34.66	95.2258	100	probably fused
WBGene00275306	TRINITY_DN6571_c0_g1_i1.p1	2	34.66	97.3593	99.43	probably fused
WBGene00101507	TRINITY_DN777_c0_g2_i1.p1	2	34.58	96.8948	93.98	probably fused
WBGene00203496	TRINITY_DN746_c0_g2_i1.p1	2	34.54	98.593	NA	probably fused
WBGene00094650	TRINITY_DN2741_c0_g1_i1.p1	2	34.48	92.1885	37.18	probably fused
WBGene00118651	TRINITY_DN1371_c0_g6_i1.p1	2	34.41	96.1109	99.19	probably fused
WBGene00277753	TRINITY_DN8710_c0_g1_i1.p1	2	34.41	92.4525	62.98	probably fused
WBGene00108640	TRINITY_DN13362_c0_g1_i1.p1	2	34.36	96.3331	92.86	probably fused
WBGene00118289	TRINITY_DN27259_c0_g1_i1.p1	2	34.31	98.3754	99.31	probably fused
WBGene00273210	TRINITY_DN10539_c0_g3_i1.p1	2	34.3	83.1148	92.72	probably fused
WBGene00110948	TRINITY_DN15921_c0_g2_i1.p1	2	34.3	99.037	57.55	probably fused
WBGene00280344	TRINITY_DN5449_c0_g1_i1.p1	2	34.28	98.9077	99.77	probably fused
WBGene00107414	TRINITY_DN5406_c0_g1_i1.p1	2	34.28	98.9335	97.98	probably fused
WBGene00091989	TRINITY_DN4842_c0_g1_i1.p1	2	34.26	98.8452	NA	probably fused
WBGene00116506	TRINITY_DN1300_c0_g1_i1.p1	2	34.21	98.9568	93.08	probably fused
WBGene00102874	TRINITY_DN27701_c0_g1_i1.p2	2	34.02	85.7034	98.76	probably fused
WBGene00092803	TRINITY_DN28980_c0_g1_i1.p1	2	33.98	94.5824	99.2	probably fused
WBGene00101260	TRINITY_DN2837_c0_g1_i2.p1	2	33.91	89.378	99.72	probably fused
WBGene00117372	TRINITY_DN29194_c0_g1_i1.p1	2	33.84	97.0939	71.19	probably fused
WBGene00091977	TRINITY_DN2704_c0_g1_i2.p1	2	33.82	94.7873	100	probably fused
WBGene00110911	TRINITY_DN3851_c0_g2_i1.p1	2	33.82	92.6743	96.35	probably fused
WBGene00273248	TRINITY_DN34136_c0_g1_i1.p1	2	33.79	82.9519	15.25	probably fused
WBGene00205427	TRINITY_DN5523_c0_g5_i1.p1	2	33.74	84.525	40.11	probably fused
WBGene00109435	TRINITY_DN2067_c0_g1_i1.p1	2	33.67	99.4259	NA	probably fused
WBGene00104059	TRINITY_DN32036_c0_g1_i1.p1	2	33.64	97.8587	71.57	probably fused
WBGene00096513	TRINITY_DN11982_c0_g1_i1.p1	2	33.57	98.5473	87.38	probably fused
WBGene00100882	TRINITY_DN4235_c0_g1_i1.p1	2	33.55	97.2603	93.97	probably fused
WBGene00090408	TRINITY_DN9363_c0_g1_i1.p1	2	33.54	98.3411	NA	probably fused
WBGene00107196	TRINITY_DN6005_c0_g1_i1.p1	2	33.46	97.7281	88.89	probably fused
WBGene00099914	TRINITY_DN3790_c0_g1_i1.p1	2	33.44	83.9502	NA	probably fused
WBGene00104261	TRINITY_DN47_c0_g3_i1.p1	2	33.41	94.4642	100	probably fused
WBGene00090264	TRINITY_DN18355_c0_g2_i1.p1	2	33.28	99.1634	99.4	probably fused
WBGene00095444	TRINITY_DN5450_c0_g3_i2.p1	2	33.21	99.5268	93.62	probably fused
WBGene00112025	TRINITY_DN7111_c0_g1_i1.p2	2	33.09	94.3057	99.45	probably fused
WBGene00203520	TRINITY_DN17492_c0_g1_i1.p1	2	33.07	97.4396	99.51	probably fused
WBGene00090277	TRINITY_DN6241_c0_g1_i3.p1	2	33.02	92.5836	98.93	probably fused
WBGene00114553	TRINITY_DN34513_c0_g1_i1.p1	2	33.01	98.6577	80	probably fused
WBGene00092856	TRINITY_DN6309_c0_g1_i1.p1	2	33	98.2844	96.23	probably fused
WBGene00095444	TRINITY_DN5450_c0_g1_i1.p1	2	32.89	95.5503	99.06	probably fused
WBGene00109362	TRINITY_DN4852_c0_g1_i1.p1	2	32.87	99.1877	93.97	probably fused
WBGene00117291	TRINITY_DN9715_c0_g1_i2.p1	2	32.78	80.8153	12.01	probably fused
WBGene00107973	TRINITY_DN2673_c0_g1_i1.p1	2	32.77	98.8976	96.21	probably fused
WBGene00107008	TRINITY_DN1249_c0_g1_i1.p1	2	32.71	98.4201	NA	probably fused
WBGene00304692	TRINITY_DN7918_c0_g1_i3.p2	2	32.67	85.2925	NA	probably fused
WBGene00281588	TRINITY_DN5380_c0_g1_i1.p1	2	32.66	97.9117	NA	probably fused
WBGene00111171	TRINITY_DN24998_c0_g1_i1.p1	2	32.66	96.9881	78.79	probably fused
WBGene00098534	TRINITY_DN21310_c0_g1_i1.p1	2	32.63	96.5868	97.28	probably fused
WBGene00110911	TRINITY_DN5966_c0_g1_i1.p1	2	32.61	94.8871	96.35	probably fused
WBGene00276844	TRINITY_DN106_c0_g3_i1.p1	2	32.6	96.6078	94.54	probably fused
WBGene00106112	TRINITY_DN13102_c0_g1_i1.p1	2	32.57	81.0072	68.87	probably fused
WBGene00102180	TRINITY_DN32527_c0_g1_i1.p2	2	32.53	83.6844	97.22	probably fused
WBGene00274922	TRINITY_DN8607_c0_g1_i1.p1	2	32.51	95.7369	40.8	probably fused
WBGene00092853	TRINITY_DN9565_c0_g1_i1.p1	2	32.4	98.3902	97.98	probably fused
WBGene00115240	TRINITY_DN1096_c0_g1_i1.p1	2	32.39	96.2454	69.99	probably fused
WBGene00113540	TRINITY_DN6728_c0_g2_i1.p1	2	32.35	97.1905	NA	probably fused
WBGene00108363	TRINITY_DN32077_c0_g1_i1.p1	2	32.29	98.0835	80	probably fused
WBGene00274213	TRINITY_DN1369_c0_g2_i3.p1	2	32.27	98.3353	NA	probably fused
WBGene00093701	TRINITY_DN209_c0_g1_i9.p1	2	32.27	97.0215	98.21	probably fused
WBGene00281812	TRINITY_DN1274_c0_g1_i4.p1	2	32.26	97.1288	99.58	probably fused
WBGene00117518	TRINITY_DN14066_c0_g1_i1.p1	2	32.24	98.6091	90.99	probably fused
WBGene00277067	TRINITY_DN2776_c0_g1_i7.p1	2	32.18	82.5927	NA	probably fused
WBGene00099954	TRINITY_DN1794_c0_g1_i1.p1	2	32.17	96.657	77.84	probably fused
WBGene00096594	TRINITY_DN5015_c0_g1_i1.p1	2	32.09	99.289	99.29	probably fused
WBGene00118510	TRINITY_DN4685_c0_g1_i1.p1	2	32.09	98.933	96.66	probably fused
WBGene00112356	TRINITY_DN2001_c0_g1_i2.p1	2	32.02	98.6849	97.9	probably fused
WBGene00095300	TRINITY_DN13520_c0_g1_i1.p2	2	32.01	94.6845	20.03	probably fused
WBGene00276011	TRINITY_DN12663_c0_g3_i1.p1	2	31.99	93.975	87.73	probably fused
WBGene00105576	TRINITY_DN763_c0_g1_i5.p1	2	31.89	98.8772	91.47	probably fused
WBGene00103899	TRINITY_DN516_c0_g2_i1.p1	2	31.88	98.6961	54.2	probably fused
WBGene00103546	TRINITY_DN4113_c0_g1_i1.p1	2	31.86	88.1316	91.56	probably fused
WBGene00091987	TRINITY_DN91_c0_g2_i2.p1	2	31.85	92.8557	98.92	probably fused
WBGene00098915	TRINITY_DN1995_c0_g1_i2.p1	2	31.74	97.8605	99.81	probably fused
WBGene00090021	TRINITY_DN22469_c1_g1_i2.p1	2	31.7	91.4767	91.63	probably fused
WBGene00116880	TRINITY_DN1024_c0_g1_i1.p1	2	31.69	90.3747	97.39	probably fused
WBGene00093657	TRINITY_DN1214_c3_g1_i1.p1	2	31.63	98.791	98.85	probably fused
WBGene00282021	TRINITY_DN10853_c0_g1_i1.p1	2	31.61	98.49	93.94	probably fused
WBGene00104539	TRINITY_DN23902_c0_g1_i1.p1	2	31.6	92.1597	NA	probably fused
WBGene00108266	TRINITY_DN4242_c0_g1_i2.p1	2	31.6	95.9066	74.69	probably fused
WBGene00104261	TRINITY_DN47_c0_g2_i4.p1	2	31.59	98.2013	100	probably fused
WBGene00117515	TRINITY_DN18036_c0_g1_i1.p1	2	31.57	94.0322	NA	probably fused
WBGene00095971	TRINITY_DN4056_c0_g1_i2.p1	2	31.48	99.261	94.05	probably fused
WBGene00090741	TRINITY_DN14016_c0_g2_i1.p1	2	31.07	99.511	NA	probably fused
WBGene00096090	TRINITY_DN1200_c0_g3_i4.p1	2	31.03	93.4183	99	probably fused
WBGene00276945	TRINITY_DN1173_c0_g1_i2.p2	2	30.98	93.1802	79.34	probably fused
WBGene00115661	TRINITY_DN16804_c0_g1_i1.p1	2	30.86	97.0144	30.88	probably fused
WBGene00090879	TRINITY_DN6699_c0_g6_i1.p1	2	30.83	84.3268	34.39	probably fused
WBGene00118806	TRINITY_DN521_c0_g1_i1.p1	2	30.78	96.0271	96.17	probably fused
WBGene00117763	TRINITY_DN1165_c0_g1_i5.p1	2	30.71	85.621	30.67	probably fused
WBGene00118428	TRINITY_DN1805_c0_g2_i1.p2	2	30.66	95.6282	92.52	probably fused
WBGene00112093	TRINITY_DN27028_c0_g1_i1.p1	2	30.63	98.7007	29.37	probably fused
WBGene00275862	TRINITY_DN260_c0_g2_i1.p1	2	30.59	95.1206	95.08	probably fused
WBGene00091414	TRINITY_DN4888_c0_g1_i2.p1	2	30.56	98.3265	NA	probably fused
WBGene00094535	TRINITY_DN33936_c0_g1_i1.p1	2	30.49	97.1406	73.75	probably fused
WBGene00097791	TRINITY_DN3980_c0_g1_i1.p1	2	30.29	98.8518	90.59	probably fused
WBGene00094535	TRINITY_DN1741_c0_g1_i1.p1	2	30.27	95.6962	76.12	probably fused
WBGene00110853	TRINITY_DN19129_c0_g1_i1.p1	2	30.22	96.8537	40.33	probably fused
WBGene00107375	TRINITY_DN3078_c0_g1_i3.p1	2	30.21	98.3131	50.19	probably fused
WBGene00089902	TRINITY_DN5437_c0_g1_i2.p1	2	30.12	92.8563	99.21	probably fused
WBGene00097126	TRINITY_DN6752_c0_g1_i1.p1	2	29.98	90.3913	100	probably fused
WBGene00112028	TRINITY_DN17356_c0_g1_i1.p1	2	29.87	94.3695	76.73	probably fused
WBGene00100848	TRINITY_DN6099_c0_g1_i1.p1	2	29.85	97.9662	71.01	probably fused
WBGene00096606	TRINITY_DN15062_c0_g1_i1.p1	2	29.79	81.695	19.49	probably fused
WBGene00116780	TRINITY_DN14448_c1_g1_i2.p1	2	29.71	91.3871	97.89	probably fused
WBGene00104431	TRINITY_DN10105_c0_g1_i1.p1	2	29.66	97.3866	97.44	probably fused
WBGene00107998	TRINITY_DN12210_c1_g1_i1.p1	2	29.6	97.9974	44.89	probably fused
WBGene00274213	TRINITY_DN528_c0_g2_i1.p1	2	29.5	98.7852	NA	probably fused
WBGene00097342	TRINITY_DN6844_c0_g1_i2.p1	2	29.44	92.3569	95.27	probably fused
WBGene00276945	TRINITY_DN7482_c0_g1_i2.p1	2	29.33	95.5413	99.69	probably fused
WBGene00098367	TRINITY_DN238_c0_g1_i1.p1	2	29.32	97.5486	NA	probably fused
WBGene00114778	TRINITY_DN26699_c0_g1_i1.p1	2	29.27	98.7101	98.47	probably fused
WBGene00098434	TRINITY_DN6192_c0_g1_i1.p1	2	29.15	99.1845	99.51	probably fused
WBGene00114077	TRINITY_DN3728_c0_g1_i1.p2	2	28.96	84.1553	93.12	probably fused
WBGene00273194	TRINITY_DN2802_c0_g2_i5.p1	2	28.84	98.0152	NA	probably fused
WBGene00103256	TRINITY_DN23732_c0_g1_i1.p1	2	28.82	99.063	99.11	probably fused
WBGene00113558	TRINITY_DN4805_c0_g1_i1.p1	2	28.76	83.0185	98.41	probably fused
WBGene00281105	TRINITY_DN7408_c0_g4_i1.p1	2	28.73	95.5054	59.96	probably fused
WBGene00106577	TRINITY_DN208_c0_g1_i1.p1	2	28.66	95.0591	92.24	probably fused
WBGene00118458	TRINITY_DN17493_c0_g1_i4.p2	2	28.54	87.4907	96.52	probably fused
WBGene00109058	TRINITY_DN12905_c0_g2_i2.p1	2	28.53	95.1595	19.99	probably fused
WBGene00103767	TRINITY_DN3583_c0_g2_i1.p1	2	28.52	82.7296	73.85	probably fused
WBGene00118273	TRINITY_DN33675_c0_g1_i1.p1	2	28.44	97.0782	92.1	probably fused
WBGene00115961	TRINITY_DN27966_c0_g1_i1.p1	2	28.35	98.501	99.18	probably fused
WBGene00281276	TRINITY_DN4176_c0_g1_i1.p1	2	28.32	98.2018	93.8	probably fused
WBGene00101511	TRINITY_DN1851_c0_g1_i2.p1	2	28.23	93.3198	100	probably fused
WBGene00105466	TRINITY_DN28917_c0_g1_i1.p1	2	28.21	94.9063	44.89	probably fused
WBGene00093701	TRINITY_DN209_c0_g1_i7.p1	2	28.19	96.6673	93.43	probably fused
WBGene00100282	TRINITY_DN13395_c0_g1_i1.p1	2	28.15	89.9468	25.29	probably fused
WBGene00282377	TRINITY_DN13395_c0_g1_i1.p1	2	28.15	89.9468	25.29	probably fused
WBGene00092087	TRINITY_DN31153_c0_g1_i1.p1	2	28.12	98.3178	93.66	probably fused
WBGene00090280	TRINITY_DN23790_c0_g1_i1.p2	2	28.1	92.0126	74.63	probably fused
WBGene00098129	TRINITY_DN5707_c0_g1_i1.p1	2	28.08	96.3606	97.08	probably fused
WBGene00103395	TRINITY_DN26838_c0_g1_i1.p1	2	28.06	99.6793	93.89	probably fused
WBGene00118240	TRINITY_DN33855_c0_g1_i1.p1	2	28.05	99.6931	97.99	probably fused
WBGene00116237	TRINITY_DN20105_c0_g1_i1.p1	2	28.03	95.011	56.38	probably fused
WBGene00273289	TRINITY_DN11389_c0_g2_i1.p1	2	28.03	84.638	27.24	probably fused
WBGene00091908	TRINITY_DN29258_c0_g1_i1.p1	2	28.01	98.2941	93.62	probably fused
WBGene00100361	TRINITY_DN9683_c1_g1_i1.p1	2	27.86	99.2939	94.76	probably fused
WBGene00098413	TRINITY_DN31301_c0_g1_i1.p1	2	27.85	96.2122	90.23	probably fused
WBGene00100361	TRINITY_DN12022_c0_g1_i1.p1	2	27.66	99.8394	80.05	probably fused
WBGene00090864	TRINITY_DN3443_c0_g1_i1.p1	2	27.64	95.7627	96	probably fused
WBGene00115961	TRINITY_DN7087_c0_g1_i2.p1	2	27.62	98.8512	94.1	probably fused
WBGene00096913	TRINITY_DN20140_c0_g1_i2.p1	2	27.6	80.2904	90.67	probably fused
WBGene00100714	TRINITY_DN17470_c0_g1_i1.p1	2	27.6	97.9946	31.01	probably fused
WBGene00278351	TRINITY_DN24968_c0_g1_i1.p1	2	27.58	98.643	93.09	probably fused
WBGene00104059	TRINITY_DN18322_c0_g1_i1.p1	2	27.52	94.0267	99.08	probably fused
WBGene00107017	TRINITY_DN6440_c0_g1_i1.p1	2	27.48	99.2957	85.84	probably fused
WBGene00105230	TRINITY_DN4614_c0_g1_i5.p1	2	27.43	99.0612	86.36	probably fused
WBGene00089943	TRINITY_DN28947_c0_g1_i1.p1	2	27.42	97.9947	31.04	probably fused
WBGene00114928	TRINITY_DN26671_c0_g1_i1.p1	2	27.33	99.8409	92.12	probably fused
WBGene00091908	TRINITY_DN875_c0_g2_i1.p1	2	27.26	94.862	98.91	probably fused
WBGene00092432	TRINITY_DN9387_c0_g1_i1.p1	2	27.15	99.3139	97.89	probably fused
WBGene00114705	TRINITY_DN34076_c0_g1_i1.p1	2	27.09	98.9521	100	probably fused
WBGene00090464	TRINITY_DN9856_c0_g1_i2.p1	2	26.99	86.8053	33.61	probably fused
WBGene00275840	TRINITY_DN2911_c0_g1_i1.p1	2	26.9	98.8501	NA	probably fused
WBGene00089664	TRINITY_DN10999_c0_g1_i1.p1	2	26.86	99.0123	NA	probably fused
WBGene00089608	TRINITY_DN3881_c0_g3_i2.p1	2	26.73	95.7971	NA	probably fused
WBGene00109675	TRINITY_DN6842_c0_g1_i3.p1	2	26.7	94.0899	99.12	probably fused
WBGene00097666	TRINITY_DN2197_c0_g1_i1.p1	2	26.7	93.691	81.95	probably fused
WBGene00099246	TRINITY_DN6046_c0_g1_i1.p1	2	26.61	92.9248	94.32	probably fused
WBGene00273286	TRINITY_DN15210_c0_g2_i1.p1	2	26.58	84.7213	25.84	probably fused
WBGene00105760	TRINITY_DN19075_c0_g1_i1.p1	2	26.58	92.7421	13.74	probably fused
WBGene00095046	TRINITY_DN12033_c0_g1_i2.p1	2	26.47	99.078	29.01	probably fused
WBGene00276306	TRINITY_DN31365_c0_g1_i1.p1	2	26.21	97.9084	96.29	probably fused
WBGene00103593	TRINITY_DN3859_c0_g1_i1.p1	2	26.09	86.5901	82.33	probably fused
WBGene00106576	TRINITY_DN4086_c0_g1_i2.p1	2	26.05	97.8725	96.53	probably fused
WBGene00096046	TRINITY_DN1757_c0_g1_i11.p1	2	26.01	93.415	98.2	probably fused
WBGene00096980	TRINITY_DN7720_c0_g1_i1.p1	2	26.01	97.7012	87.75	probably fused
WBGene00276306	TRINITY_DN31707_c0_g1_i1.p1	2	25.86	95.1232	96.29	probably fused
WBGene00096286	TRINITY_DN773_c0_g1_i2.p1	2	25.77	88.0924	92	probably fused
WBGene00097342	TRINITY_DN132_c0_g1_i1.p1	2	25.74	97.9512	93.95	probably fused
WBGene00279252	TRINITY_DN1338_c0_g1_i1.p1	2	25.71	96.8281	NA	probably fused
WBGene00099450	TRINITY_DN2271_c0_g1_i2.p1	2	25.69	96.7258	97.44	probably fused
WBGene00094703	TRINITY_DN29169_c0_g1_i1.p1	2	25.6	98.7605	NA	probably fused
WBGene00097422	TRINITY_DN10748_c0_g1_i1.p1	2	25.44	99.4122	96.2	probably fused
WBGene00111607	TRINITY_DN582_c0_g2_i1.p1	2	25.39	95.1806	92.98	probably fused
WBGene00107017	TRINITY_DN6683_c1_g1_i1.p1	2	25.39	98.4974	92.67	probably fused
WBGene00104722	TRINITY_DN4764_c0_g1_i1.p1	2	25.36	99.7424	97.4	probably fused
WBGene00103704	TRINITY_DN24853_c0_g1_i1.p1	2	25.33	99.6254	47.15	probably fused
WBGene00098847	TRINITY_DN5157_c0_g1_i1.p2	2	25.31	83.4615	69.76	probably fused
WBGene00092372	TRINITY_DN5647_c0_g2_i1.p1	2	25.3	95.3969	24.29	probably fused
WBGene00105521	TRINITY_DN11_c0_g1_i4.p1	2	25.28	99.2324	92.23	probably fused
WBGene00107781	TRINITY_DN15787_c0_g1_i1.p1	2	25.22	85.1893	63.11	probably fused
WBGene00109372	TRINITY_DN1193_c0_g1_i3.p1	2	25.21	99.3446	94.47	probably fused
WBGene00107094	TRINITY_DN7278_c0_g2_i1.p1	2	25.21	92.7527	92.68	probably fused
WBGene00116237	TRINITY_DN12186_c0_g1_i2.p1	2	25.14	93.2132	54.45	probably fused
WBGene00108593	TRINITY_DN27050_c0_g1_i1.p1	2	25.1	92.8589	NA	probably fused
WBGene00106791	TRINITY_DN4816_c0_g2_i1.p1	2	25	98.5232	97.87	probably fused
WBGene00096756	TRINITY_DN2241_c0_g1_i1.p1	2	24.91	97.254	30.25	probably fused
WBGene00204275	TRINITY_DN2208_c0_g1_i1.p1	2	24.88	99.032	92.53	probably fused
WBGene00107673	TRINITY_DN5138_c0_g1_i1.p1	2	24.79	83.7254	12.38	probably fused
WBGene00102508	TRINITY_DN851_c0_g1_i1.p1	2	24.77	94.1784	94.54	probably fused
WBGene00093127	TRINITY_DN9512_c0_g2_i1.p1	2	24.64	96.3462	99.61	probably fused
WBGene00110480	TRINITY_DN4803_c0_g1_i3.p2	2	24.64	91.1258	98.7	probably fused
WBGene00102135	TRINITY_DN16930_c0_g1_i1.p1	2	24.58	96.4583	NA	probably fused
WBGene00091150	TRINITY_DN5744_c0_g1_i1.p1	2	24.55	89.7666	100	probably fused
WBGene00091544	TRINITY_DN1668_c0_g1_i1.p1	2	24.53	98.632	91.09	probably fused
WBGene00094785	TRINITY_DN23981_c0_g1_i1.p2	2	24.49	94.2157	58.6	probably fused
WBGene00097611	TRINITY_DN13482_c0_g1_i1.p1	2	24.42	97.8694	18.55	probably fused
WBGene00107989	TRINITY_DN24005_c0_g1_i1.p1	2	24.32	92.5107	86.99	probably fused
WBGene00111805	TRINITY_DN651_c0_g1_i1.p1	2	24.23	94.5337	100	probably fused
WBGene00096037	TRINITY_DN2625_c0_g1_i1.p1	2	24.21	97.9607	99.5	probably fused
WBGene00272031	TRINITY_DN6892_c0_g2_i1.p1	2	24.17	92.5056	41.5	probably fused
WBGene00101683	TRINITY_DN9522_c3_g2_i1.p1	2	24.14	80.3752	NA	probably fused
WBGene00115824	TRINITY_DN4670_c0_g1_i1.p1	2	23.99	92.8814	95.36	probably fused
WBGene00112183	TRINITY_DN29492_c0_g1_i1.p1	2	23.96	99.7735	90.21	probably fused
WBGene00114778	TRINITY_DN7386_c0_g1_i1.p1	2	23.89	98.5777	100	probably fused
WBGene00116673	TRINITY_DN1827_c0_g1_i5.p1	2	23.86	94.965	NA	probably fused
WBGene00118077	TRINITY_DN80_c0_g1_i3.p1	2	23.77	92.4857	95.77	probably fused
WBGene00091544	TRINITY_DN7833_c0_g1_i1.p1	2	23.77	98.4057	94.47	probably fused
WBGene00112248	TRINITY_DN1674_c0_g1_i5.p1	2	23.75	99.1669	NA	probably fused
WBGene00274265	TRINITY_DN25928_c0_g1_i1.p1	2	23.57	88.8306	96.38	probably fused
WBGene00278566	TRINITY_DN34516_c0_g1_i1.p2	2	23.55	81.1158	100	probably fused
WBGene00093657	TRINITY_DN21456_c0_g1_i1.p1	2	23.5	95.5569	98.49	probably fused
WBGene00092047	TRINITY_DN10856_c0_g1_i2.p1	2	23.38	89.0414	99.07	probably fused
WBGene00098367	TRINITY_DN1441_c0_g2_i1.p1	2	23.31	86.1876	NA	probably fused
WBGene00097987	TRINITY_DN11947_c0_g1_i1.p1	2	23.26	93.534	92.31	probably fused
WBGene00098409	TRINITY_DN2689_c0_g1_i2.p1	2	23.25	99.4909	96.94	probably fused
WBGene00112254	TRINITY_DN1286_c0_g1_i6.p1	2	23.12	95.9571	77.29	probably fused
WBGene00106577	TRINITY_DN7443_c0_g2_i1.p1	2	23.11	97.8971	82.86	probably fused
WBGene00099367	TRINITY_DN1554_c0_g1_i1.p1	2	23.09	96.8606	99.03	probably fused
WBGene00101087	TRINITY_DN16211_c0_g1_i1.p1	2	23.05	94.0958	88.68	probably fused
WBGene00107972	TRINITY_DN1903_c0_g1_i5.p1	2	23.04	80.1593	NA	probably fused
WBGene00113108	TRINITY_DN11348_c0_g1_i1.p1	2	23.01	94.6454	NA	probably fused
WBGene00111290	TRINITY_DN134_c0_g2_i1.p1	2	23	99.4641	87.82	probably fused
WBGene00099917	TRINITY_DN3680_c0_g1_i2.p1	2	22.99	86.5611	88.61	probably fused
WBGene00117515	TRINITY_DN5026_c0_g1_i1.p1	2	22.93	93.4091	NA	probably fused
WBGene00097726	TRINITY_DN5582_c0_g1_i1.p1	2	22.89	98.4281	92.65	probably fused
WBGene00115191	TRINITY_DN33473_c0_g1_i1.p1	2	22.85	98.2034	92.72	probably fused
WBGene00106045	TRINITY_DN202_c0_g3_i1.p1	2	22.79	99.3541	95.05	probably fused
WBGene00280003	TRINITY_DN6031_c0_g2_i4.p1	2	22.78	82.9246	99.61	probably fused
WBGene00114628	TRINITY_DN3232_c0_g5_i1.p1	2	22.73	95.6854	92.49	probably fused
WBGene00099520	TRINITY_DN255_c0_g1_i1.p1	2	22.69	97.819	98.22	probably fused
WBGene00102159	TRINITY_DN31493_c0_g1_i1.p1	2	22.65	94.9978	98.08	probably fused
WBGene00106045	TRINITY_DN202_c0_g1_i1.p1	2	22.61	95.2477	91.35	probably fused
WBGene00104492	TRINITY_DN81_c0_g1_i1.p1	2	22.5	96.658	100	probably fused
WBGene00100674	TRINITY_DN298_c0_g4_i1.p1	2	22.49	99.5662	89.25	probably fused
WBGene00278409	TRINITY_DN6275_c0_g1_i1.p1	2	22.48	98.762	100	probably fused
WBGene00195123	TRINITY_DN34131_c0_g1_i1.p2	2	22.48	93.7831	16.01	probably fused
WBGene00281850	TRINITY_DN1898_c0_g1_i1.p1	2	22.47	98.6661	70.71	probably fused
WBGene00113558	TRINITY_DN25649_c0_g1_i1.p1	2	22.44	97.9495	91.81	probably fused
WBGene00111319	TRINITY_DN3754_c0_g1_i1.p1	2	22.23	98.6004	100	probably fused
WBGene00112248	TRINITY_DN1674_c0_g1_i4.p1	2	22.21	97.6962	96.12	probably fused
WBGene00111290	TRINITY_DN134_c0_g5_i1.p1	2	22.2	98.7117	65.34	probably fused
WBGene00103270	TRINITY_DN13491_c0_g1_i2.p1	2	22.15	83.2236	54.6	probably fused
WBGene00113337	TRINITY_DN9420_c0_g2_i1.p1	2	22.13	99.5431	100	probably fused
WBGene00106954	TRINITY_DN23485_c0_g1_i1.p1	2	22.13	98.63	97.21	probably fused
WBGene00096606	TRINITY_DN29136_c0_g1_i1.p1	2	22.1	80.9848	5.64	probably fused
WBGene00102066	TRINITY_DN58_c0_g3_i1.p1	2	22.05	99.1747	96.94	probably fused
WBGene00107680	TRINITY_DN18452_c0_g1_i1.p1	2	22.05	93.9193	17.82	probably fused
WBGene00103117	TRINITY_DN5853_c1_g1_i2.p1	2	22.03	98.9603	96.71	probably fused
WBGene00103616	TRINITY_DN6148_c0_g1_i1.p1	2	21.99	99.0233	74.48	probably fused
WBGene00100508	TRINITY_DN8483_c0_g1_i9.p1	2	21.72	96.9763	54.89	probably fused
WBGene00106293	TRINITY_DN27083_c0_g1_i1.p1	2	21.68	98.9766	93.3	probably fused
WBGene00282442	TRINITY_DN24973_c0_g1_i1.p1	2	21.6	98.8556	66.67	probably fused
WBGene00099367	TRINITY_DN34_c1_g1_i2.p1	2	21.52	98.5612	99.03	probably fused
WBGene00278611	TRINITY_DN6741_c0_g1_i1.p1	2	21.41	98.3949	77.97	probably fused
WBGene00104079	TRINITY_DN15383_c0_g1_i1.p1	2	21.37	91.8455	92.29	probably fused
WBGene00109573	TRINITY_DN1530_c0_g1_i1.p4	2	21.28	81.4351	100	probably fused
WBGene00111180	TRINITY_DN4368_c0_g2_i2.p1	2	21.28	98.7825	71.97	probably fused
WBGene00096072	TRINITY_DN15411_c0_g2_i1.p1	2	21.27	98.2792	98.93	probably fused
WBGene00099480	TRINITY_DN20193_c0_g1_i1.p1	2	21.24	81.3402	27.71	probably fused
WBGene00272955	TRINITY_DN6279_c1_g4_i1.p1	2	21.19	93.7217	97.84	probably fused
WBGene00101683	TRINITY_DN29244_c0_g1_i1.p1	2	21.12	92.8518	NA	probably fused
WBGene00102318	TRINITY_DN15883_c0_g2_i2.p1	2	20.99	81.4471	12.43	probably fused
WBGene00099262	TRINITY_DN1671_c0_g1_i6.p1	2	20.89	86.2504	94.64	probably fused
WBGene00114227	TRINITY_DN33489_c0_g1_i1.p1	2	20.87	96.7613	93.79	probably fused
WBGene00096090	TRINITY_DN1118_c0_g1_i1.p1	2	20.85	98.2421	97.58	probably fused
WBGene00277881	TRINITY_DN582_c0_g1_i2.p1	2	20.8	96.5711	100	probably fused
WBGene00099275	TRINITY_DN11267_c0_g2_i1.p1	2	20.79	97.6495	97.44	probably fused
WBGene00095833	TRINITY_DN5290_c0_g1_i1.p1	2	20.79	84.785	93.57	probably fused
WBGene00107781	TRINITY_DN2220_c0_g2_i1.p1	2	20.74	96.6087	49.92	probably fused
WBGene00205391	TRINITY_DN11391_c0_g1_i1.p1	2	20.67	92.5365	94.89	probably fused
WBGene00103988	TRINITY_DN3099_c0_g1_i2.p1	2	20.63	91.6885	59.49	probably fused
WBGene00099907	TRINITY_DN8039_c0_g1_i1.p1	2	20.59	94.4013	82.38	probably fused
WBGene00118717	TRINITY_DN9187_c0_g1_i1.p1	2	20.49	97.4796	97.65	probably fused
WBGene00101647	TRINITY_DN2291_c0_g1_i1.p2	2	20.46	91.9246	91.52	probably fused
WBGene00108074	TRINITY_DN2038_c0_g1_i1.p1	2	20.4	96.9972	93.11	probably fused
WBGene00105968	TRINITY_DN7569_c0_g1_i1.p1	2	20.35	81.1956	94.83	probably fused
WBGene00112254	TRINITY_DN4292_c0_g1_i1.p1	2	20.3	97.8225	98.86	probably fused
WBGene00116312	TRINITY_DN7975_c0_g1_i1.p1	2	20.17	94.6759	94.12	probably fused
WBGene00096023	TRINITY_DN913_c0_g1_i1.p1	2	20	99.182	74.06	probably fused
WBGene00112990	TRINITY_DN1528_c0_g3_i3.p1	2	20	95.5927	70.73	probably fused
WBGene00114951	TRINITY_DN2758_c0_g1_i1.p1	2	19.92	97.6214	99.73	probably fused
WBGene00107896	TRINITY_DN1729_c0_g1_i3.p1	2	19.88	97.3073	86.25	probably fused
WBGene00118806	TRINITY_DN2677_c1_g1_i1.p1	2	19.78	97.893	99.02	probably fused
WBGene00102508	TRINITY_DN8240_c0_g1_i1.p1	2	19.73	96.8293	85.87	probably fused
WBGene00111365	TRINITY_DN873_c0_g2_i1.p1	2	19.73	98.5369	49.1	probably fused
WBGene00098027	TRINITY_DN26896_c0_g1_i1.p1	2	19.69	94.7651	19.05	probably fused
WBGene00089892	TRINITY_DN27090_c0_g1_i1.p1	2	19.65	91.1978	17.78	probably fused
WBGene00111173	TRINITY_DN8327_c0_g1_i1.p1	2	19.59	92.5621	97.78	probably fused
WBGene00091513	TRINITY_DN1788_c0_g1_i7.p1	2	19.34	83.8883	20.71	probably fused
WBGene00114904	TRINITY_DN2140_c0_g1_i5.p1	2	19.26	92.4892	93.2	probably fused
WBGene00111383	TRINITY_DN5291_c0_g2_i4.p1	2	19.17	83.2395	81.23	probably fused
WBGene00115041	TRINITY_DN5436_c0_g1_i1.p1	2	19.17	98.8072	69.44	probably fused
WBGene00093685	TRINITY_DN5516_c0_g1_i1.p1	2	19.16	96.3058	100	probably fused
WBGene00273286	TRINITY_DN7801_c0_g1_i4.p1	2	19.13	93.4469	96.6	probably fused
WBGene00109352	TRINITY_DN1580_c0_g1_i1.p1	2	19.1	92.0572	98.88	probably fused
WBGene00100674	TRINITY_DN298_c0_g1_i3.p1	2	19.09	90.3373	80.12	probably fused
WBGene00092087	TRINITY_DN250_c0_g1_i1.p1	2	19.02	98.048	91.24	probably fused
WBGene00109541	TRINITY_DN6496_c0_g1_i1.p1	2	18.95	96.535	92.75	probably fused
WBGene00097101	TRINITY_DN31788_c0_g1_i1.p1	2	18.86	98.0661	42.03	probably fused
WBGene00273249	TRINITY_DN9084_c0_g3_i1.p1	2	18.85	83.6009	NA	probably fused
WBGene00116780	TRINITY_DN33688_c0_g1_i1.p1	2	18.75	96.544	97.64	probably fused
WBGene00098899	TRINITY_DN26681_c0_g1_i1.p2	2	18.57	97.7637	67.36	probably fused
WBGene00090464	TRINITY_DN9856_c0_g2_i1.p1	2	18.56	88.3637	26.92	probably fused
WBGene00099475	TRINITY_DN612_c0_g3_i1.p1	2	18.56	91.5928	26.83	probably fused
WBGene00098457	TRINITY_DN8045_c0_g3_i1.p1	2	18.53	97.3717	99.61	probably fused
WBGene00110755	TRINITY_DN6579_c0_g1_i1.p1	2	18.4	94.5601	91.86	probably fused
WBGene00092645	TRINITY_DN3891_c0_g3_i1.p1	2	18.34	91.8766	96.17	probably fused
WBGene00103593	TRINITY_DN5029_c0_g1_i1.p1	2	18.28	98.8471	100	probably fused
WBGene00277881	TRINITY_DN23717_c0_g1_i1.p1	2	18.28	98.8357	89.31	probably fused
WBGene00100946	TRINITY_DN819_c0_g1_i1.p1	2	18.16	89.6162	68.77	probably fused
WBGene00089608	TRINITY_DN31452_c0_g1_i1.p1	2	18.13	98.7698	91.19	probably fused
WBGene00109850	TRINITY_DN7174_c0_g1_i1.p1	2	18.13	83.6743	76.28	probably fused
WBGene00110599	TRINITY_DN15131_c0_g1_i1.p1	2	18.05	98.9444	40.19	probably fused
WBGene00116711	TRINITY_DN619_c0_g2_i1.p1	2	17.85	95.9223	NA	probably fused
WBGene00106344	TRINITY_DN8133_c0_g1_i1.p1	2	17.68	99.0597	96.13	probably fused
WBGene00116711	TRINITY_DN619_c0_g1_i1.p1	2	17.67	99.2426	98.37	probably fused
WBGene00095190	TRINITY_DN9463_c0_g1_i2.p1	2	17.64	88.4432	89.04	probably fused
WBGene00116843	TRINITY_DN41_c0_g1_i1.p1	2	17.57	94.8007	80.77	probably fused
WBGene00112423	TRINITY_DN26832_c0_g1_i1.p1	2	17.42	97.3047	16.39	probably fused
WBGene00098403	TRINITY_DN4193_c0_g1_i1.p1	2	17.23	98.2113	91	probably fused
WBGene00107563	TRINITY_DN3873_c0_g1_i3.p2	2	17.22	94.1711	100	probably fused
WBGene00113193	TRINITY_DN7704_c0_g1_i3.p1	2	17.11	90.1074	97.22	probably fused
WBGene00092106	TRINITY_DN4844_c0_g1_i1.p1	2	17.09	98.9303	84.52	probably fused
WBGene00104242	TRINITY_DN6927_c0_g4_i2.p1	2	16.97	97.6241	97.74	probably fused
WBGene00095039	TRINITY_DN23013_c0_g1_i1.p1	2	16.96	92.8961	NA	probably fused
WBGene00096829	TRINITY_DN4227_c0_g1_i1.p1	2	16.95	95.5999	99.42	probably fused
WBGene00102645	TRINITY_DN1922_c0_g2_i3.p1	2	16.77	98.8619	56.12	probably fused
WBGene00101327	TRINITY_DN25375_c0_g1_i1.p2	2	16.76	99.7878	36.36	probably fused
WBGene00102135	TRINITY_DN1273_c0_g1_i8.p1	2	16.68	97.992	NA	probably fused
WBGene00096756	TRINITY_DN10460_c0_g2_i1.p1	2	16.64	80.1937	NA	probably fused
WBGene00096231	TRINITY_DN426_c0_g1_i1.p1	2	16.63	86.1869	90.2	probably fused
WBGene00093669	TRINITY_DN31565_c0_g1_i1.p1	2	16.61	96.7098	97.2	probably fused
WBGene00092862	TRINITY_DN4077_c0_g1_i1.p1	2	16.53	98.0406	100	probably fused
WBGene00273669	TRINITY_DN5151_c1_g1_i1.p1	2	16.48	91.2728	NA	probably fused
WBGene00109749	TRINITY_DN2021_c0_g1_i7.p1	2	16.33	90.5243	84.12	probably fused
WBGene00276162	TRINITY_DN31288_c0_g1_i1.p1	2	16.27	97.3922	87.46	probably fused
WBGene00094693	TRINITY_DN127_c1_g1_i1.p2	2	16.26	95.0027	16.92	probably fused
WBGene00098029	TRINITY_DN31737_c0_g1_i1.p1	2	16.2	99.0191	93.25	probably fused
WBGene00110948	TRINITY_DN233_c0_g2_i16.p1	2	16.07	96.587	83.3	probably fused
WBGene00105313	TRINITY_DN7121_c0_g1_i2.p1	2	16.05	97.3137	100	probably fused
WBGene00114744	TRINITY_DN31338_c0_g1_i1.p1	2	16.05	99.5666	86.13	probably fused
WBGene00118153	TRINITY_DN5381_c0_g2_i2.p1	2	16.04	98.6689	98.86	probably fused
WBGene00111208	TRINITY_DN760_c0_g2_i1.p1	2	15.99	96.3733	97.06	probably fused
WBGene00096009	TRINITY_DN4906_c0_g2_i2.p1	2	15.85	94.4019	NA	probably fused
WBGene00098534	TRINITY_DN24818_c0_g1_i1.p1	2	15.84	98.8943	99.52	probably fused
WBGene00112519	TRINITY_DN2951_c0_g1_i1.p1	2	15.83	92.9425	99.41	probably fused
WBGene00099262	TRINITY_DN7032_c0_g1_i1.p1	2	15.79	94.9316	97.28	probably fused
WBGene00278150	TRINITY_DN3993_c0_g1_i1.p1	2	15.68	97.7356	98.65	probably fused
WBGene00090351	TRINITY_DN5311_c0_g2_i1.p1	2	15.64	94.9814	NA	probably fused
WBGene00102115	TRINITY_DN26818_c0_g1_i1.p1	2	15.64	98.2419	86.32	probably fused
WBGene00276738	TRINITY_DN34424_c0_g1_i1.p2	2	15.47	96.9096	93.97	probably fused
WBGene00111180	TRINITY_DN1342_c0_g1_i1.p1	2	15.31	98.9843	100	probably fused
WBGene00206300	TRINITY_DN2975_c0_g1_i1.p1	2	15.23	98.8459	92.13	probably fused
WBGene00272181	TRINITY_DN6961_c0_g2_i1.p1	2	15.18	95.7592	21.94	probably fused
WBGene00115191	TRINITY_DN2660_c0_g1_i1.p1	2	15.1	97.7781	99.07	probably fused
WBGene00272307	TRINITY_DN2070_c0_g1_i1.p1	2	15.05	98.8117	97.73	probably fused
WBGene00105492	TRINITY_DN10406_c0_g1_i1.p1	2	14.97	98.5544	94.31	probably fused
WBGene00114628	TRINITY_DN13097_c0_g1_i1.p1	2	14.94	95.0075	69.57	probably fused
WBGene00101974	TRINITY_DN126_c0_g2_i1.p1	2	14.88	98.3869	94.23	probably fused
WBGene00104242	TRINITY_DN108_c0_g1_i1.p1	2	14.69	98.2893	75	probably fused
WBGene00100304	TRINITY_DN2312_c0_g1_i1.p2	2	14.61	87.1857	69.38	probably fused
WBGene00096072	TRINITY_DN6366_c0_g1_i1.p1	2	14.53	98.8544	90.43	probably fused
WBGene00115104	TRINITY_DN30242_c0_g1_i1.p1	2	14.47	99.3873	98.24	probably fused
WBGene00108593	TRINITY_DN6026_c0_g1_i1.p3	2	14.37	87.9919	42.86	probably fused
WBGene00109573	TRINITY_DN1530_c0_g1_i1.p3	2	14.36	85.0528	100	probably fused
WBGene00090658	TRINITY_DN1914_c0_g1_i1.p1	2	14.16	89.0684	92.14	probably fused
WBGene00098731	TRINITY_DN6959_c0_g1_i1.p1	2	14.13	97.0964	98.05	probably fused
WBGene00110596	TRINITY_DN13788_c0_g1_i1.p1	2	14.09	98.7875	93.93	probably fused
WBGene00091797	TRINITY_DN1837_c0_g1_i1.p1	2	14.07	98.8583	99.2	probably fused
WBGene00094344	TRINITY_DN1949_c0_g1_i1.p1	2	14.04	98.7881	67.31	probably fused
WBGene00104431	TRINITY_DN10105_c0_g1_i1.p2	2	14.03	87.3849	94.54	probably fused
WBGene00109058	TRINITY_DN31618_c0_g1_i1.p1	2	14.01	91.4988	12.99	probably fused
WBGene00111208	TRINITY_DN1343_c0_g1_i2.p1	2	13.95	90.6549	NA	probably fused
WBGene00203618	TRINITY_DN134_c1_g1_i1.p1	2	13.95	90.8425	66.48	probably fused
WBGene00106656	TRINITY_DN5052_c0_g1_i2.p1	2	13.9	99.5694	NA	probably fused
WBGene00096829	TRINITY_DN4645_c0_g1_i1.p1	2	13.89	99.6808	98.77	probably fused
WBGene00099227	TRINITY_DN11267_c0_g1_i2.p1	2	13.85	98.1535	91.28	probably fused
WBGene00100508	TRINITY_DN8470_c0_g1_i1.p1	2	13.49	90.0365	24.79	probably fused
WBGene00115977	TRINITY_DN1003_c0_g2_i1.p1	2	13.49	90.9941	21.84	probably fused
WBGene00114862	TRINITY_DN27129_c0_g1_i1.p1	2	13.46	92.8931	99.31	probably fused
WBGene00111383	TRINITY_DN27300_c0_g1_i1.p1	2	13.41	98.2282	99.52	probably fused
WBGene00118341	TRINITY_DN33505_c0_g1_i1.p1	2	13.36	98.1237	NA	probably fused
WBGene00281477	TRINITY_DN12106_c0_g1_i3.p2	2	13.3	89.7812	14.55	probably fused
WBGene00104961	TRINITY_DN8279_c0_g2_i1.p1	2	13.27	99.3667	99.74	probably fused
WBGene00117849	TRINITY_DN2214_c0_g1_i1.p1	2	13.24	89.8854	93.31	probably fused
WBGene00102645	TRINITY_DN2181_c0_g1_i1.p1	2	13.22	90.3817	44.23	probably fused
WBGene00114809	TRINITY_DN26862_c0_g1_i1.p1	2	13.08	97.4309	92.12	probably fused
WBGene00099475	TRINITY_DN5082_c0_g1_i1.p1	2	13.06	96.0449	96.2	probably fused
WBGene00099506	TRINITY_DN2512_c0_g2_i4.p1	2	12.99	92.4238	99.56	probably fused
WBGene00111469	TRINITY_DN4302_c0_g3_i1.p1	2	12.5	94.2293	NA	probably fused
WBGene00109372	TRINITY_DN29073_c0_g1_i1.p1	2	12.48	98.0972	100	probably fused
WBGene00109288	TRINITY_DN2172_c0_g2_i3.p1	2	12.47	91.5282	19.72	probably fused
WBGene00091823	TRINITY_DN6827_c0_g1_i1.p1	2	12.35	90.5093	95.26	probably fused
WBGene00113399	TRINITY_DN319_c0_g1_i7.p1	2	12.34	95.5291	98.92	probably fused
WBGene00094844	TRINITY_DN3885_c0_g1_i1.p1	2	12.22	90.5148	NA	probably fused
WBGene00098131	TRINITY_DN24733_c0_g1_i1.p1	2	12.08	98.3215	100	probably fused
WBGene00095271	TRINITY_DN6084_c0_g1_i1.p1	2	11.87	91.6003	9.5	probably fused
WBGene00273488	TRINITY_DN2740_c1_g1_i1.p1	2	11.64	88.6773	NA	probably fused
WBGene00095400	TRINITY_DN3569_c0_g1_i1.p1	2	11.57	99.0025	99.68	probably fused
WBGene00118428	TRINITY_DN1386_c0_g1_i2.p1	2	11.5	88.8649	98.8	probably fused
WBGene00091513	TRINITY_DN6759_c0_g1_i1.p1	2	11.39	91.9458	10.96	probably fused
WBGene00096469	TRINITY_DN6785_c0_g1_i2.p1	2	11.37	91.6724	97.87	probably fused
WBGene00096033	TRINITY_DN29671_c0_g1_i1.p1	2	11.34	99.1952	NA	probably fused
WBGene00103651	TRINITY_DN2472_c0_g1_i2.p1	2	11.24	93.1476	NA	probably fused
WBGene00102066	TRINITY_DN32050_c0_g1_i1.p2	2	11.23	97.1199	NA	probably fused
WBGene00099227	TRINITY_DN4930_c0_g1_i2.p1	2	11.08	98.7662	96.37	probably fused
WBGene00283835	TRINITY_DN25553_c0_g1_i1.p1	2	11.06	93.7475	85.45	probably fused
WBGene00110030	TRINITY_DN857_c0_g1_i1.p1	2	11	92.3327	98.28	probably fused
WBGene00280086	TRINITY_DN18430_c0_g1_i1.p1	2	10.84	87.754	NA	probably fused
WBGene00089646	TRINITY_DN28422_c0_g1_i1.p1	2	10.76	88.9537	94.87	probably fused
WBGene00110853	TRINITY_DN20851_c0_g1_i1.p1	2	10.7	83.5662	8.76	probably fused
WBGene00107024	TRINITY_DN7750_c0_g2_i1.p3	2	10.62	83.0513	100	probably fused
WBGene00093695	TRINITY_DN26720_c0_g1_i1.p1	2	10.41	99.7565	88.64	probably fused
WBGene00281105	TRINITY_DN2962_c0_g1_i1.p1	2	10.16	95.0376	21.09	probably fused
WBGene00100782	TRINITY_DN12375_c0_g2_i2.p1	2	10.13	96.4085	100	probably fused
WBGene00115062	TRINITY_DN33788_c0_g1_i1.p1	2	10.09	94.1548	95	probably fused
WBGene00099305	TRINITY_DN5719_c0_g1_i1.p1	2	10	99.417	87.28	probably fused
WBGene00094785	TRINITY_DN4_c3_g1_i1.p1	2	9.99	96.9938	22.1	probably fused
WBGene00116803	TRINITY_DN32695_c0_g1_i1.p1	2	9.96	97.4225	NA	probably fused
WBGene00109288	TRINITY_DN779_c0_g1_i1.p1	2	9.84	93.752	NA	probably fused
WBGene00092111	TRINITY_DN6426_c0_g1_i1.p1	2	9.67	93.003	96.64	probably fused
WBGene00272307	TRINITY_DN2695_c0_g1_i1.p1	2	9.6	85.9105	97.96	probably fused
WBGene00117332	TRINITY_DN630_c0_g1_i19.p1	2	9.53	84.5456	90.59	probably fused
WBGene00115240	TRINITY_DN12224_c0_g1_i1.p1	2	9.47	98.7726	83.8	probably fused
WBGene00095400	TRINITY_DN3390_c0_g1_i1.p1	2	9.46	91.2302	99.68	probably fused
WBGene00276844	TRINITY_DN24524_c0_g1_i1.p1	2	9.34	98.8917	100	probably fused
WBGene00106576	TRINITY_DN8349_c1_g1_i2.p1	2	9.23	85.6934	65	probably fused
WBGene00116394	TRINITY_DN1698_c0_g1_i11.p1	2	9.17	97.1564	NA	probably fused
WBGene00101260	TRINITY_DN22875_c0_g1_i2.p1	2	9.1	83.0114	98.28	probably fused
WBGene00101194	TRINITY_DN5293_c0_g1_i1.p1	2	8.85	99.4255	95.11	probably fused
WBGene00098029	TRINITY_DN6119_c0_g1_i1.p1	2	8.77	92.0951	100	probably fused
WBGene00095949	TRINITY_DN7483_c0_g1_i1.p1	2	8.55	91.0764	98.68	probably fused
WBGene00106559	TRINITY_DN6269_c0_g1_i1.p2	2	8.52	95.4119	85.94	probably fused
WBGene00092862	TRINITY_DN28898_c0_g1_i1.p1	2	8.26	99.1852	39.65	probably fused
WBGene00112183	TRINITY_DN13386_c0_g1_i1.p1	2	8.1	96.5822	77.44	probably fused
WBGene00102728	TRINITY_DN26765_c0_g1_i1.p1	2	7.89	97.9881	100	probably fused
WBGene00103099	TRINITY_DN30109_c0_g1_i1.p1	2	7.86	96.9565	61.79	probably fused
WBGene00281507	TRINITY_DN7617_c0_g1_i2.p1	2	7.68	84.9368	97.73	probably fused
WBGene00103548	TRINITY_DN6015_c0_g1_i1.p1	2	7.6	97.3154	87.8	probably fused
WBGene00118157	TRINITY_DN5223_c0_g1_i1.p1	2	7.5	98.6163	NA	probably fused
WBGene00282344	TRINITY_DN30286_c0_g1_i1.p1	2	7.45	98.1185	84.19	probably fused
WBGene00281850	TRINITY_DN1229_c0_g3_i1.p1	2	7.17	81.5987	47.93	probably fused
WBGene00098434	TRINITY_DN33786_c0_g1_i1.p2	2	7.08	96.0465	100	probably fused
WBGene00114284	TRINITY_DN1861_c0_g1_i7.p2	2	7.07	88.4907	48.5	probably fused
WBGene00098409	TRINITY_DN1979_c0_g4_i1.p1	2	6.87	99.0757	70.37	probably fused
WBGene00106293	TRINITY_DN5587_c0_g1_i1.p1	2	6.78	97.5611	92.59	probably fused
WBGene00101864	TRINITY_DN4714_c0_g1_i1.p1	2	6.69	98.7568	97.3	probably fused
WBGene00091749	TRINITY_DN3338_c0_g2_i8.p1	2	6.57	99.673	92.86	probably fused
WBGene00109541	TRINITY_DN6834_c0_g1_i1.p1	2	6.2	99.251	86.51	probably fused
WBGene00101087	TRINITY_DN33026_c0_g1_i1.p3	2	5.66	85.6777	12.56	probably fused
WBGene00090599	TRINITY_DN1019_c0_g1_i2.p2	2	4.77	85.3172	99.3	probably fused
WBGene00095046	TRINITY_DN9036_c0_g1_i1.p1	2	4.58	86.3635	6.39	probably fused
WBGene00089649	TRINITY_DN3136_c0_g1_i1.p1	1	100	98.798	NA	coherent
WBGene00089775	TRINITY_DN3766_c0_g1_i1.p1	1	100	91.3356	NA	coherent
WBGene00089840	TRINITY_DN2012_c0_g1_i1.p1	1	100	95.9295	NA	coherent
WBGene00089865	TRINITY_DN22718_c0_g1_i1.p1	1	100	90.899	NA	coherent
WBGene00089950	TRINITY_DN67_c0_g2_i1.p1	1	100	98.7049	NA	coherent
WBGene00090163	TRINITY_DN14544_c0_g3_i1.p1	1	100	90.589	NA	coherent
WBGene00090241	TRINITY_DN3370_c0_g1_i5.p1	1	100	97.268	NA	coherent
WBGene00090300	TRINITY_DN8887_c0_g1_i2.p1	1	100	87.7336	NA	coherent
WBGene00090700	TRINITY_DN27044_c0_g1_i1.p1	1	100	95.1556	NA	coherent
WBGene00091321	TRINITY_DN622_c0_g1_i1.p1	1	100	85.6469	NA	coherent
WBGene00091597	TRINITY_DN24220_c0_g1_i1.p2	1	100	93.2873	NA	coherent
WBGene00091713	TRINITY_DN7440_c0_g1_i4.p1	1	100	95.039	NA	coherent
WBGene00091759	TRINITY_DN9028_c0_g5_i1.p1	1	100	98.6483	NA	coherent
WBGene00091794	TRINITY_DN29951_c0_g1_i1.p1	1	100	94.864	NA	coherent
WBGene00091858	TRINITY_DN17966_c0_g1_i1.p1	1	100	97.0498	NA	coherent
WBGene00091964	TRINITY_DN10669_c0_g1_i1.p1	1	100	94.9306	NA	coherent
WBGene00091990	TRINITY_DN32648_c0_g1_i1.p1	1	100	94.6959	NA	coherent
WBGene00092234	TRINITY_DN9019_c0_g2_i1.p2	1	100	93.1632	NA	coherent
WBGene00092310	TRINITY_DN2418_c1_g4_i1.p1	1	100	91.1423	NA	coherent
WBGene00092319	TRINITY_DN31475_c0_g1_i1.p1	1	100	97.4928	NA	coherent
WBGene00092320	TRINITY_DN6358_c0_g1_i1.p1	1	100	96.8448	NA	coherent
WBGene00092510	TRINITY_DN27430_c0_g1_i1.p1	1	100	99.218	NA	coherent
WBGene00092579	TRINITY_DN22554_c0_g1_i1.p1	1	100	98.8958	NA	coherent
WBGene00092639	TRINITY_DN2763_c0_g1_i1.p1	1	100	83.4193	NA	coherent
WBGene00092824	TRINITY_DN1236_c0_g1_i1.p1	1	100	99.0221	NA	coherent
WBGene00092907	TRINITY_DN893_c0_g2_i3.p1	1	100	95.1466	NA	coherent
WBGene00093039	TRINITY_DN1078_c0_g1_i1.p1	1	100	97.8698	NA	coherent
WBGene00093858	TRINITY_DN1907_c0_g2_i1.p1	1	100	86.7933	NA	coherent
WBGene00093878	TRINITY_DN11070_c0_g1_i2.p1	1	100	95.4051	NA	coherent
WBGene00094011	TRINITY_DN10819_c0_g1_i1.p1	1	100	97.8398	NA	coherent
WBGene00094113	TRINITY_DN28961_c0_g1_i1.p2	1	100	90.2948	NA	coherent
WBGene00094117	TRINITY_DN1105_c0_g1_i1.p1	1	100	94.6148	NA	coherent
WBGene00094420	TRINITY_DN8860_c0_g1_i1.p1	1	100	95.2901	NA	coherent
WBGene00094455	TRINITY_DN33666_c0_g1_i1.p3	1	100	98.0076	NA	coherent
WBGene00094489	TRINITY_DN13382_c0_g1_i1.p1	1	100	97.9634	NA	coherent
WBGene00094640	TRINITY_DN10492_c0_g1_i1.p1	1	100	92.3575	NA	coherent
WBGene00094644	TRINITY_DN7609_c0_g1_i1.p1	1	100	97.1219	NA	coherent
WBGene00094659	TRINITY_DN15913_c0_g1_i1.p1	1	100	99.2908	NA	coherent
WBGene00095462	TRINITY_DN25246_c0_g1_i1.p1	1	100	97.925	NA	coherent
WBGene00095739	TRINITY_DN28314_c0_g1_i1.p2	1	100	95.7567	NA	coherent
WBGene00095890	TRINITY_DN5202_c0_g1_i1.p2	1	100	99.3902	NA	coherent
WBGene00096101	TRINITY_DN4198_c0_g1_i1.p1	1	100	98.1151	NA	coherent
WBGene00096116	TRINITY_DN2822_c0_g1_i3.p1	1	100	96.3638	NA	coherent
WBGene00096312	TRINITY_DN2470_c0_g1_i1.p1	1	100	98.678	NA	coherent
WBGene00096342	TRINITY_DN1822_c0_g2_i1.p2	1	100	87.0158	NA	coherent
WBGene00096427	TRINITY_DN25911_c0_g1_i1.p1	1	100	97.0863	NA	coherent
WBGene00096486	TRINITY_DN6118_c0_g1_i1.p1	1	100	98.656	NA	coherent
WBGene00096584	TRINITY_DN11129_c0_g2_i2.p1	1	100	80.6322	NA	coherent
WBGene00097290	TRINITY_DN23500_c0_g1_i1.p1	1	100	98.9026	NA	coherent
WBGene00097412	TRINITY_DN32516_c0_g1_i1.p1	1	100	98.7262	NA	coherent
WBGene00097581	TRINITY_DN742_c0_g1_i1.p1	1	100	93.7741	NA	coherent
WBGene00097762	TRINITY_DN33563_c0_g1_i1.p1	1	100	99.0264	NA	coherent
WBGene00097902	TRINITY_DN17517_c0_g1_i2.p1	1	100	80.1016	NA	coherent
WBGene00098089	TRINITY_DN18589_c0_g1_i1.p1	1	100	93.46	NA	coherent
WBGene00098302	TRINITY_DN6322_c0_g2_i1.p3	1	100	99.4778	NA	coherent
WBGene00098406	TRINITY_DN24437_c0_g1_i1.p1	1	100	99.9669	NA	coherent
WBGene00098519	TRINITY_DN6537_c0_g1_i3.p1	1	100	95.0902	NA	coherent
WBGene00098883	TRINITY_DN27262_c0_g1_i1.p1	1	100	90.5132	NA	coherent
WBGene00099030	TRINITY_DN18060_c0_g1_i1.p2	1	100	96.4854	NA	coherent
WBGene00099340	TRINITY_DN31840_c0_g1_i1.p1	1	100	99.4793	NA	coherent
WBGene00099377	TRINITY_DN11894_c0_g1_i1.p1	1	100	86.1248	NA	coherent
WBGene00099651	TRINITY_DN27604_c0_g1_i1.p1	1	100	94.7656	NA	coherent
WBGene00100667	TRINITY_DN34044_c0_g1_i1.p1	1	100	98.3642	NA	coherent
WBGene00100772	TRINITY_DN2146_c0_g1_i1.p1	1	100	98.7242	NA	coherent
WBGene00100845	TRINITY_DN589_c1_g1_i1.p1	1	100	98.07	NA	coherent
WBGene00101063	TRINITY_DN27421_c0_g1_i1.p1	1	100	97.6758	NA	coherent
WBGene00101091	TRINITY_DN23865_c0_g1_i1.p1	1	100	92.0081	NA	coherent
WBGene00101423	TRINITY_DN3922_c0_g1_i1.p1	1	100	94.0292	NA	coherent
WBGene00101737	TRINITY_DN4521_c0_g1_i3.p1	1	100	89.2812	NA	coherent
WBGene00101739	TRINITY_DN29088_c0_g1_i1.p1	1	100	85.8664	NA	coherent
WBGene00101914	TRINITY_DN6281_c0_g1_i1.p1	1	100	95.9005	NA	coherent
WBGene00102426	TRINITY_DN31963_c0_g1_i1.p1	1	100	98.3405	NA	coherent
WBGene00102653	TRINITY_DN647_c0_g1_i1.p1	1	100	91.2086	NA	coherent
WBGene00102654	TRINITY_DN13413_c0_g2_i1.p1	1	100	96.1295	NA	coherent
WBGene00103132	TRINITY_DN26825_c0_g1_i1.p1	1	100	90.3995	NA	coherent
WBGene00103196	TRINITY_DN18259_c0_g1_i1.p1	1	100	94.8842	NA	coherent
WBGene00103359	TRINITY_DN6396_c0_g2_i1.p1	1	100	92.7474	NA	coherent
WBGene00103552	TRINITY_DN1660_c0_g1_i1.p1	1	100	97.3199	NA	coherent
WBGene00103915	TRINITY_DN26810_c0_g1_i1.p1	1	100	98.7926	NA	coherent
WBGene00104807	TRINITY_DN701_c1_g2_i5.p1	1	100	84.0107	NA	coherent
WBGene00104877	TRINITY_DN642_c0_g3_i4.p1	1	100	92.7989	NA	coherent
WBGene00104903	TRINITY_DN1953_c0_g1_i1.p1	1	100	97.5418	NA	coherent
WBGene00105457	TRINITY_DN23140_c0_g1_i1.p1	1	100	83.238	NA	coherent
WBGene00105485	TRINITY_DN28977_c0_g1_i1.p1	1	100	95.1381	NA	coherent
WBGene00105488	TRINITY_DN27768_c0_g1_i1.p1	1	100	82.8901	NA	coherent
WBGene00105579	TRINITY_DN4982_c0_g1_i1.p1	1	100	99.4979	NA	coherent
WBGene00105675	TRINITY_DN5438_c0_g1_i1.p1	1	100	90.5546	NA	coherent
WBGene00105799	TRINITY_DN31421_c0_g1_i1.p1	1	100	98.9757	NA	coherent
WBGene00105829	TRINITY_DN1876_c0_g1_i4.p1	1	100	99.5682	NA	coherent
WBGene00106563	TRINITY_DN5624_c0_g1_i6.p1	1	100	86.0292	NA	coherent
WBGene00106682	TRINITY_DN20256_c0_g1_i1.p1	1	100	84.3372	NA	coherent
WBGene00106695	TRINITY_DN27449_c0_g1_i1.p1	1	100	98.0859	NA	coherent
WBGene00106949	TRINITY_DN25084_c0_g1_i1.p1	1	100	84.5121	NA	coherent
WBGene00107000	TRINITY_DN31980_c0_g1_i1.p1	1	100	95.4319	NA	coherent
WBGene00107424	TRINITY_DN10019_c0_g1_i1.p1	1	100	98.3986	NA	coherent
WBGene00107653	TRINITY_DN4439_c0_g1_i2.p1	1	100	98.086	NA	coherent
WBGene00107930	TRINITY_DN27855_c0_g1_i1.p1	1	100	96.8367	NA	coherent
WBGene00107936	TRINITY_DN4252_c0_g1_i1.p1	1	100	99.8298	NA	coherent
WBGene00107945	TRINITY_DN34199_c0_g1_i1.p1	1	100	98.4782	NA	coherent
WBGene00108083	TRINITY_DN1427_c0_g1_i1.p1	1	100	96.1839	NA	coherent
WBGene00108176	TRINITY_DN9675_c0_g1_i1.p1	1	100	97.2267	NA	coherent
WBGene00108259	TRINITY_DN29620_c0_g1_i1.p1	1	100	98.7412	NA	coherent
WBGene00108332	TRINITY_DN15780_c0_g1_i1.p1	1	100	98.0636	NA	coherent
WBGene00108901	TRINITY_DN1616_c0_g1_i1.p1	1	100	99.0253	NA	coherent
WBGene00108971	TRINITY_DN5295_c0_g1_i1.p1	1	100	85.0677	NA	coherent
WBGene00109108	TRINITY_DN3615_c0_g1_i1.p2	1	100	97.427	NA	coherent
WBGene00109283	TRINITY_DN24879_c0_g1_i1.p2	1	100	95.7758	NA	coherent
WBGene00109531	TRINITY_DN67_c0_g2_i3.p1	1	100	88.6787	NA	coherent
WBGene00109547	TRINITY_DN3849_c0_g1_i1.p1	1	100	96.0021	NA	coherent
WBGene00110170	TRINITY_DN28892_c0_g1_i1.p2	1	100	92.6229	NA	coherent
WBGene00110832	TRINITY_DN3927_c0_g1_i2.p1	1	100	96.8531	NA	coherent
WBGene00110936	TRINITY_DN34303_c0_g1_i1.p1	1	100	95.67	NA	coherent
WBGene00111111	TRINITY_DN4747_c0_g1_i1.p1	1	100	96.0619	NA	coherent
WBGene00111204	TRINITY_DN33542_c0_g1_i1.p1	1	100	98.1999	NA	coherent
WBGene00111238	TRINITY_DN4577_c0_g1_i2.p1	1	100	96.5511	NA	coherent
WBGene00111245	TRINITY_DN19483_c0_g1_i2.p1	1	100	83.5128	NA	coherent
WBGene00111512	TRINITY_DN4217_c0_g1_i1.p1	1	100	98.1829	NA	coherent
WBGene00111907	TRINITY_DN27471_c0_g1_i1.p2	1	100	98.5124	NA	coherent
WBGene00111959	TRINITY_DN21366_c0_g1_i2.p1	1	100	85.7061	NA	coherent
WBGene00112294	TRINITY_DN20213_c0_g1_i2.p1	1	100	93.5437	NA	coherent
WBGene00113019	TRINITY_DN701_c0_g3_i1.p1	1	100	93.9976	NA	coherent
WBGene00113291	TRINITY_DN5633_c0_g1_i1.p1	1	100	98.8588	NA	coherent
WBGene00113524	TRINITY_DN1696_c0_g2_i2.p1	1	100	99.2022	NA	coherent
WBGene00113533	TRINITY_DN2523_c0_g1_i3.p1	1	100	83.3065	NA	coherent
WBGene00114038	TRINITY_DN32238_c0_g1_i1.p3	1	100	87.4171	NA	coherent
WBGene00114082	TRINITY_DN3963_c0_g2_i3.p2	1	100	86.1699	NA	coherent
WBGene00114249	TRINITY_DN2128_c0_g2_i2.p1	1	100	95.6699	NA	coherent
WBGene00114310	TRINITY_DN18395_c1_g1_i2.p1	1	100	97.0038	NA	coherent
WBGene00114450	TRINITY_DN2967_c0_g4_i1.p1	1	100	93.1904	NA	coherent
WBGene00115018	TRINITY_DN5172_c0_g1_i1.p1	1	100	98.6113	NA	coherent
WBGene00115082	TRINITY_DN26933_c0_g1_i1.p1	1	100	99.2685	NA	coherent
WBGene00115206	TRINITY_DN26694_c0_g1_i1.p1	1	100	98.2752	NA	coherent
WBGene00115253	TRINITY_DN1980_c1_g1_i1.p2	1	100	93.0546	NA	coherent
WBGene00115271	TRINITY_DN24578_c0_g1_i1.p1	1	100	95.1946	NA	coherent
WBGene00115420	TRINITY_DN31386_c0_g1_i1.p1	1	100	98.9562	NA	coherent
WBGene00115718	TRINITY_DN29832_c0_g1_i1.p2	1	100	98.774	NA	coherent
WBGene00115830	TRINITY_DN5702_c0_g1_i1.p1	1	100	94.06	NA	coherent
WBGene00115940	TRINITY_DN29023_c0_g1_i1.p1	1	100	98.8985	NA	coherent
WBGene00116186	TRINITY_DN34689_c0_g1_i1.p2	1	100	99.0174	NA	coherent
WBGene00116292	TRINITY_DN3367_c0_g1_i1.p1	1	100	93.3387	NA	coherent
WBGene00116587	TRINITY_DN25245_c0_g1_i1.p1	1	100	99.3741	NA	coherent
WBGene00116619	TRINITY_DN8074_c0_g1_i1.p2	1	100	88.3093	NA	coherent
WBGene00116709	TRINITY_DN27729_c0_g1_i1.p1	1	100	98.4518	NA	coherent
WBGene00117036	TRINITY_DN146_c0_g1_i1.p1	1	100	97.9415	NA	coherent
WBGene00117485	TRINITY_DN432_c0_g1_i3.p1	1	100	93.8768	NA	coherent
WBGene00117577	TRINITY_DN5472_c0_g1_i1.p1	1	100	97.7877	NA	coherent
WBGene00117779	TRINITY_DN29357_c0_g1_i1.p1	1	100	97.0283	NA	coherent
WBGene00117821	TRINITY_DN7231_c0_g1_i1.p1	1	100	96.5752	NA	coherent
WBGene00118200	TRINITY_DN6980_c0_g1_i1.p1	1	100	97.1967	NA	coherent
WBGene00118340	TRINITY_DN8764_c0_g1_i1.p1	1	100	90.3568	NA	coherent
WBGene00118433	TRINITY_DN27801_c0_g1_i1.p1	1	100	99.4323	NA	coherent
WBGene00119138	TRINITY_DN16040_c0_g1_i1.p1	1	100	98.7653	NA	coherent
WBGene00119171	TRINITY_DN24568_c0_g1_i1.p1	1	100	98.8236	NA	coherent
WBGene00202683	TRINITY_DN1449_c0_g1_i1.p1	1	100	97.5397	NA	coherent
WBGene00203574	TRINITY_DN1592_c0_g1_i1.p1	1	100	87.5421	NA	coherent
WBGene00204203	TRINITY_DN23831_c0_g1_i1.p1	1	100	97.3927	NA	coherent
WBGene00204388	TRINITY_DN28360_c0_g1_i1.p1	1	100	94.5934	NA	coherent
WBGene00204749	TRINITY_DN10586_c1_g1_i1.p1	1	100	98.6074	NA	coherent
WBGene00204786	TRINITY_DN36_c0_g1_i1.p1	1	100	97.2823	NA	coherent
WBGene00205176	TRINITY_DN7281_c0_g1_i1.p1	1	100	98.5239	NA	coherent
WBGene00205497	TRINITY_DN18899_c0_g1_i1.p1	1	100	86.5522	NA	coherent
WBGene00205868	TRINITY_DN34948_c0_g1_i1.p1	1	100	97.9819	NA	coherent
WBGene00206003	TRINITY_DN1970_c0_g1_i5.p1	1	100	84.1165	NA	coherent
WBGene00271930	TRINITY_DN1441_c0_g1_i1.p1	1	100	96.6598	NA	coherent
WBGene00271962	TRINITY_DN7204_c0_g1_i1.p1	1	100	94.5899	NA	coherent
WBGene00271997	TRINITY_DN6831_c0_g1_i1.p1	1	100	96.6852	NA	coherent
WBGene00271998	TRINITY_DN7456_c0_g1_i1.p1	1	100	93.8132	NA	coherent
WBGene00272176	TRINITY_DN34279_c0_g1_i1.p1	1	100	97.6308	NA	coherent
WBGene00272367	TRINITY_DN12977_c0_g1_i1.p1	1	100	88.449	NA	coherent
WBGene00272552	TRINITY_DN27752_c0_g1_i1.p1	1	100	98.969	NA	coherent
WBGene00272696	TRINITY_DN8643_c0_g1_i1.p1	1	100	95.9025	NA	coherent
WBGene00273050	TRINITY_DN25060_c0_g1_i1.p1	1	100	99.4228	NA	coherent
WBGene00273101	TRINITY_DN18508_c0_g1_i1.p1	1	100	86.0739	NA	coherent
WBGene00273399	TRINITY_DN29738_c0_g1_i1.p1	1	100	89.1816	NA	coherent
WBGene00273612	TRINITY_DN303_c0_g1_i6.p1	1	100	80.7984	NA	coherent
WBGene00273705	TRINITY_DN13476_c1_g1_i1.p1	1	100	92.6901	NA	coherent
WBGene00273706	TRINITY_DN13476_c1_g1_i1.p1	1	100	92.6901	NA	coherent
WBGene00273755	TRINITY_DN34077_c0_g1_i1.p1	1	100	97.964	NA	coherent
WBGene00273860	TRINITY_DN29597_c0_g1_i1.p2	1	100	94.0332	NA	coherent
WBGene00273865	TRINITY_DN28979_c0_g1_i1.p1	1	100	96.8317	NA	coherent
WBGene00274290	TRINITY_DN2843_c0_g1_i1.p1	1	100	91.4732	NA	coherent
WBGene00274789	TRINITY_DN10351_c1_g3_i1.p1	1	100	83.3416	NA	coherent
WBGene00274808	TRINITY_DN3711_c0_g1_i2.p1	1	100	95.2781	NA	coherent
WBGene00274825	TRINITY_DN4391_c1_g1_i1.p1	1	100	98.2405	NA	coherent
WBGene00274851	TRINITY_DN2007_c0_g1_i2.p1	1	100	97.4337	NA	coherent
WBGene00275041	TRINITY_DN180_c0_g1_i1.p1	1	100	93.6862	NA	coherent
WBGene00275059	TRINITY_DN29272_c0_g1_i1.p1	1	100	98.5903	NA	coherent
WBGene00275293	TRINITY_DN10661_c0_g1_i1.p1	1	100	97.0778	NA	coherent
WBGene00275344	TRINITY_DN24730_c0_g1_i1.p1	1	100	99.6324	NA	coherent
WBGene00275353	TRINITY_DN1594_c0_g2_i2.p1	1	100	96.656	NA	coherent
WBGene00275370	TRINITY_DN11337_c0_g1_i1.p1	1	100	96.1679	NA	coherent
WBGene00275428	TRINITY_DN3154_c0_g1_i1.p1	1	100	94.5916	NA	coherent
WBGene00275518	TRINITY_DN4329_c0_g1_i1.p1	1	100	91.3707	NA	coherent
WBGene00275658	TRINITY_DN10996_c0_g1_i3.p1	1	100	83.2421	NA	coherent
WBGene00275885	TRINITY_DN1312_c0_g1_i1.p1	1	100	94.5317	NA	coherent
WBGene00275940	TRINITY_DN28085_c0_g1_i1.p1	1	100	94.1046	NA	coherent
WBGene00276017	TRINITY_DN13948_c0_g1_i1.p1	1	100	80.3833	NA	coherent
WBGene00276324	TRINITY_DN24855_c0_g1_i1.p1	1	100	99.9506	NA	coherent
WBGene00276346	TRINITY_DN18581_c0_g1_i1.p1	1	100	80.0327	NA	coherent
WBGene00276563	TRINITY_DN2032_c0_g1_i1.p1	1	100	90.7996	NA	coherent
WBGene00276693	TRINITY_DN3929_c0_g2_i2.p1	1	100	97.6586	NA	coherent
WBGene00276817	TRINITY_DN2298_c0_g1_i2.p1	1	100	81.2041	NA	coherent
WBGene00277178	TRINITY_DN12677_c0_g1_i1.p1	1	100	88.8783	NA	coherent
WBGene00277427	TRINITY_DN34716_c0_g1_i1.p1	1	100	96.5809	NA	coherent
WBGene00277794	TRINITY_DN2590_c0_g1_i2.p1	1	100	98.166	NA	coherent
WBGene00277809	TRINITY_DN24567_c0_g1_i1.p1	1	100	98.9163	NA	coherent
WBGene00278060	TRINITY_DN217_c0_g1_i9.p1	1	100	89.1313	NA	coherent
WBGene00278283	TRINITY_DN2624_c0_g1_i1.p1	1	100	99.5218	NA	coherent
WBGene00278325	TRINITY_DN6729_c0_g1_i1.p1	1	100	96.2478	NA	coherent
WBGene00278549	TRINITY_DN3643_c0_g1_i2.p1	1	100	89.4188	NA	coherent
WBGene00278583	TRINITY_DN29278_c0_g1_i1.p1	1	100	96.1239	NA	coherent
WBGene00278636	TRINITY_DN2641_c1_g1_i1.p1	1	100	97.9954	NA	coherent
WBGene00278708	TRINITY_DN2748_c0_g1_i1.p1	1	100	98.8058	NA	coherent
WBGene00278762	TRINITY_DN9676_c0_g1_i1.p1	1	100	94.2846	NA	coherent
WBGene00278975	TRINITY_DN6885_c0_g1_i1.p1	1	100	97.5164	NA	coherent
WBGene00279267	TRINITY_DN1573_c0_g1_i1.p1	1	100	99.4528	NA	coherent
WBGene00279431	TRINITY_DN203_c0_g1_i1.p1	1	100	92.8674	NA	coherent
WBGene00279524	TRINITY_DN3665_c0_g1_i1.p2	1	100	89.6292	NA	coherent
WBGene00279825	TRINITY_DN19822_c0_g1_i1.p1	1	100	85.1915	NA	coherent
WBGene00279918	TRINITY_DN26942_c0_g1_i1.p1	1	100	98.8209	NA	coherent
WBGene00280079	TRINITY_DN2288_c0_g1_i2.p2	1	100	86.4748	NA	coherent
WBGene00280216	TRINITY_DN3492_c0_g1_i4.p1	1	100	95.1661	NA	coherent
WBGene00280243	TRINITY_DN16553_c0_g1_i1.p1	1	100	95.4578	NA	coherent
WBGene00280434	TRINITY_DN33476_c0_g1_i1.p1	1	100	98.9541	NA	coherent
WBGene00280459	TRINITY_DN28954_c0_g1_i1.p1	1	100	97.8962	NA	coherent
WBGene00280508	TRINITY_DN10440_c0_g1_i1.p1	1	100	96.0455	NA	coherent
WBGene00280569	TRINITY_DN8539_c0_g1_i1.p1	1	100	86.4992	NA	coherent
WBGene00280870	TRINITY_DN1971_c0_g1_i4.p1	1	100	93.258	NA	coherent
WBGene00281023	TRINITY_DN23060_c0_g1_i1.p1	1	100	87.3822	NA	coherent
WBGene00281545	TRINITY_DN24612_c0_g1_i1.p1	1	100	95.9849	NA	coherent
WBGene00281645	TRINITY_DN11121_c0_g2_i7.p1	1	100	96.8302	NA	coherent
WBGene00281684	TRINITY_DN715_c0_g1_i4.p1	1	100	89.5912	NA	coherent
WBGene00281757	TRINITY_DN24622_c0_g1_i1.p1	1	100	96.1284	NA	coherent
WBGene00281782	TRINITY_DN12840_c0_g1_i3.p1	1	100	97.5012	NA	coherent
WBGene00281791	TRINITY_DN34267_c0_g1_i1.p1	1	100	95.5486	NA	coherent
WBGene00282666	TRINITY_DN11608_c0_g1_i1.p1	1	100	99.0714	NA	coherent
WBGene00282955	TRINITY_DN4386_c0_g1_i1.p1	1	100	94.5436	NA	coherent
WBGene00283073	TRINITY_DN5349_c0_g1_i1.p1	1	100	96.6886	NA	coherent
WBGene00284307	TRINITY_DN15058_c0_g2_i1.p1	1	100	97.0312	NA	coherent
WBGene00304255	TRINITY_DN6638_c0_g1_i1.p1	1	100	98.0911	NA	coherent
WBGene00304272	TRINITY_DN2298_c0_g1_i2.p1	1	100	81.2041	NA	coherent
WBGene00304312	TRINITY_DN31838_c0_g1_i1.p1	1	100	98.5164	NA	coherent
WBGene00304331	TRINITY_DN4861_c0_g1_i1.p1	1	100	95.1885	NA	coherent
WBGene00304370	TRINITY_DN29987_c0_g1_i1.p1	1	100	96.0271	NA	coherent
WBGene00304373	TRINITY_DN8903_c0_g1_i1.p1	1	100	96.2334	NA	coherent
WBGene00304406	TRINITY_DN12977_c0_g1_i1.p1	1	100	88.449	NA	coherent
WBGene00304452	TRINITY_DN832_c0_g1_i1.p1	1	100	95.4289	NA	coherent
WBGene00304465	TRINITY_DN2506_c0_g1_i1.p1	1	100	82.4932	NA	coherent
WBGene00304483	TRINITY_DN8737_c0_g1_i1.p1	1	100	98.2869	NA	coherent
WBGene00304503	TRINITY_DN9706_c0_g2_i1.p1	1	100	98.7574	NA	coherent
WBGene00304656	TRINITY_DN17379_c0_g2_i1.p1	1	100	95.7153	NA	coherent
WBGene00304685	TRINITY_DN3927_c0_g1_i2.p1	1	100	96.8531	NA	coherent
WBGene00304715	TRINITY_DN31688_c0_g1_i1.p1	1	100	92.9299	NA	coherent
WBGene00304738	TRINITY_DN24966_c0_g1_i1.p1	1	100	94.7528	NA	coherent
WBGene00304865	TRINITY_DN6191_c0_g1_i1.p1	1	100	97.2575	NA	coherent
WBGene00304922	TRINITY_DN29397_c0_g1_i1.p1	1	100	98.2763	NA	coherent
WBGene00089578	TRINITY_DN2611_c0_g1_i1.p1	1	100	95.7618	100	coherent
WBGene00089615	TRINITY_DN4187_c0_g1_i1.p1	1	100	98.0852	100	coherent
WBGene00089713	TRINITY_DN1243_c0_g1_i1.p1	1	100	92.7906	100	coherent
WBGene00089769	TRINITY_DN40_c0_g2_i1.p1	1	100	99.2947	100	coherent
WBGene00090073	TRINITY_DN2699_c0_g1_i5.p1	1	100	85.6314	100	coherent
WBGene00090094	TRINITY_DN5958_c0_g1_i1.p1	1	100	99.2312	100	coherent
WBGene00090493	TRINITY_DN13717_c0_g1_i1.p1	1	100	98.1569	100	coherent
WBGene00090616	TRINITY_DN28886_c0_g1_i1.p1	1	100	97.6275	100	coherent
WBGene00090839	TRINITY_DN10138_c0_g1_i2.p2	1	100	94.8199	100	coherent
WBGene00091096	TRINITY_DN26884_c0_g1_i1.p1	1	100	96.2177	100	coherent
WBGene00091109	TRINITY_DN2245_c0_g1_i2.p1	1	100	86.0389	100	coherent
WBGene00091110	TRINITY_DN29542_c0_g1_i1.p1	1	100	87.6351	100	coherent
WBGene00091132	TRINITY_DN23822_c0_g1_i1.p1	1	100	90.3204	100	coherent
WBGene00091292	TRINITY_DN6186_c0_g2_i2.p1	1	100	82.3799	100	coherent
WBGene00091300	TRINITY_DN31809_c0_g1_i1.p2	1	100	96.2726	100	coherent
WBGene00091356	TRINITY_DN23_c0_g1_i1.p1	1	100	94.6353	100	coherent
WBGene00091623	TRINITY_DN25330_c0_g1_i1.p1	1	100	97.549	100	coherent
WBGene00091694	TRINITY_DN1945_c0_g1_i3.p1	1	100	88.3617	100	coherent
WBGene00091716	TRINITY_DN1566_c0_g2_i1.p1	1	100	92.1947	100	coherent
WBGene00091723	TRINITY_DN9835_c0_g1_i1.p1	1	100	92.3035	100	coherent
WBGene00091985	TRINITY_DN23730_c0_g1_i1.p1	1	100	96.5178	100	coherent
WBGene00092000	TRINITY_DN2528_c0_g1_i1.p1	1	100	97.6967	100	coherent
WBGene00092054	TRINITY_DN3702_c0_g1_i2.p2	1	100	94.7119	100	coherent
WBGene00092059	TRINITY_DN4780_c0_g1_i1.p1	1	100	99.379	100	coherent
WBGene00092066	TRINITY_DN26918_c0_g1_i1.p2	1	100	99.6391	100	coherent
WBGene00092147	TRINITY_DN23639_c0_g1_i1.p1	1	100	98.8323	100	coherent
WBGene00092156	TRINITY_DN227_c0_g1_i2.p1	1	100	95.6679	100	coherent
WBGene00092306	TRINITY_DN4534_c0_g1_i1.p1	1	100	90.7806	100	coherent
WBGene00092316	TRINITY_DN2375_c0_g1_i1.p1	1	100	96.1441	100	coherent
WBGene00092507	TRINITY_DN9522_c1_g1_i1.p1	1	100	96.0882	100	coherent
WBGene00092810	TRINITY_DN34155_c0_g1_i1.p1	1	100	98.7515	100	coherent
WBGene00092818	TRINITY_DN7188_c0_g2_i1.p1	1	100	98.1803	100	coherent
WBGene00093010	TRINITY_DN1245_c1_g2_i1.p1	1	100	98.4904	100	coherent
WBGene00093716	TRINITY_DN11190_c0_g1_i1.p1	1	100	99.2018	100	coherent
WBGene00094255	TRINITY_DN33614_c0_g1_i1.p1	1	100	98.5518	100	coherent
WBGene00094267	TRINITY_DN5426_c0_g1_i1.p1	1	100	83.7456	100	coherent
WBGene00094695	TRINITY_DN1180_c0_g1_i1.p1	1	100	96.6881	100	coherent
WBGene00094728	TRINITY_DN9135_c0_g2_i1.p1	1	100	98.8648	100	coherent
WBGene00094772	TRINITY_DN4925_c0_g1_i1.p1	1	100	90.687	100	coherent
WBGene00095546	TRINITY_DN26815_c0_g1_i1.p1	1	100	98.8808	100	coherent
WBGene00095571	TRINITY_DN3992_c0_g1_i3.p1	1	100	93.0895	100	coherent
WBGene00095686	TRINITY_DN7164_c0_g1_i2.p1	1	100	84.6617	100	coherent
WBGene00095976	TRINITY_DN9785_c1_g2_i1.p1	1	100	81.5606	100	coherent
WBGene00096022	TRINITY_DN1604_c0_g1_i1.p1	1	100	97.0735	100	coherent
WBGene00096125	TRINITY_DN1095_c0_g1_i1.p1	1	100	98.0781	100	coherent
WBGene00096284	TRINITY_DN9615_c0_g1_i1.p1	1	100	94.56	100	coherent
WBGene00096710	TRINITY_DN11026_c0_g1_i1.p1	1	100	90.2479	100	coherent
WBGene00096833	TRINITY_DN29362_c0_g1_i1.p1	1	100	99.2905	100	coherent
WBGene00096834	TRINITY_DN3845_c5_g1_i1.p1	1	100	97.5423	100	coherent
WBGene00097305	TRINITY_DN27628_c0_g1_i1.p1	1	100	99.1265	100	coherent
WBGene00097504	TRINITY_DN645_c0_g1_i1.p1	1	100	96.4607	100	coherent
WBGene00097680	TRINITY_DN3857_c0_g1_i1.p1	1	100	99.0015	100	coherent
WBGene00097721	TRINITY_DN24453_c0_g1_i1.p2	1	100	82.0149	100	coherent
WBGene00098397	TRINITY_DN4932_c0_g1_i1.p1	1	100	97.9473	100	coherent
WBGene00098433	TRINITY_DN698_c0_g1_i1.p1	1	100	98.1738	100	coherent
WBGene00098456	TRINITY_DN6221_c0_g1_i1.p1	1	100	86.4679	100	coherent
WBGene00098567	TRINITY_DN4163_c0_g1_i3.p1	1	100	98.1756	100	coherent
WBGene00098720	TRINITY_DN2938_c0_g1_i1.p1	1	100	97.894	100	coherent
WBGene00098823	TRINITY_DN7501_c0_g1_i2.p1	1	100	97.4523	100	coherent
WBGene00098957	TRINITY_DN32336_c0_g1_i1.p2	1	100	92.5363	100	coherent
WBGene00098998	TRINITY_DN1858_c0_g1_i2.p1	1	100	97.7	100	coherent
WBGene00099433	TRINITY_DN1208_c0_g2_i2.p1	1	100	98.5314	100	coherent
WBGene00099646	TRINITY_DN24659_c0_g1_i1.p1	1	100	99.6406	100	coherent
WBGene00099787	TRINITY_DN3818_c0_g1_i1.p1	1	100	99.0841	100	coherent
WBGene00099813	TRINITY_DN31836_c0_g1_i1.p1	1	100	92.9098	100	coherent
WBGene00099846	TRINITY_DN1769_c0_g1_i1.p1	1	100	98.3734	100	coherent
WBGene00100083	TRINITY_DN2573_c0_g1_i1.p1	1	100	98.7537	100	coherent
WBGene00100756	TRINITY_DN15956_c1_g1_i4.p1	1	100	80.1132	100	coherent
WBGene00100856	TRINITY_DN4569_c0_g1_i1.p1	1	100	99.3032	100	coherent
WBGene00100862	TRINITY_DN1820_c0_g1_i1.p1	1	100	91.9589	100	coherent
WBGene00100973	TRINITY_DN5399_c0_g2_i1.p1	1	100	90.8258	100	coherent
WBGene00101590	TRINITY_DN26714_c0_g1_i1.p1	1	100	98.6803	100	coherent
WBGene00101619	TRINITY_DN8392_c0_g1_i1.p1	1	100	97.3197	100	coherent
WBGene00101644	TRINITY_DN1431_c0_g2_i1.p1	1	100	97.0081	100	coherent
WBGene00101807	TRINITY_DN219_c0_g1_i1.p1	1	100	81.5553	100	coherent
WBGene00102375	TRINITY_DN2499_c0_g1_i2.p1	1	100	96.518	100	coherent
WBGene00103230	TRINITY_DN1826_c0_g1_i1.p1	1	100	90.0502	100	coherent
WBGene00103543	TRINITY_DN392_c0_g1_i1.p1	1	100	90.0753	100	coherent
WBGene00103571	TRINITY_DN13322_c0_g1_i1.p1	1	100	94.3795	100	coherent
WBGene00103916	TRINITY_DN31330_c0_g1_i1.p1	1	100	98.3837	100	coherent
WBGene00103942	TRINITY_DN31674_c0_g1_i1.p2	1	100	91.8328	100	coherent
WBGene00104034	TRINITY_DN13970_c0_g1_i1.p1	1	100	96.6307	100	coherent
WBGene00104061	TRINITY_DN1734_c0_g1_i1.p1	1	100	96.3234	100	coherent
WBGene00104131	TRINITY_DN31482_c0_g1_i1.p1	1	100	99.4494	100	coherent
WBGene00104342	TRINITY_DN13649_c0_g2_i1.p1	1	100	95.4363	100	coherent
WBGene00104714	TRINITY_DN2751_c0_g1_i1.p1	1	100	96.3036	100	coherent
WBGene00104912	TRINITY_DN4497_c0_g1_i1.p1	1	100	98.6959	100	coherent
WBGene00105373	TRINITY_DN9570_c0_g2_i1.p1	1	100	98.5029	100	coherent
WBGene00105441	TRINITY_DN31138_c0_g1_i1.p1	1	100	84.0681	100	coherent
WBGene00106291	TRINITY_DN3800_c0_g1_i1.p1	1	100	97.344	100	coherent
WBGene00106323	TRINITY_DN26727_c0_g1_i1.p1	1	100	99.473	100	coherent
WBGene00106409	TRINITY_DN9744_c0_g1_i1.p2	1	100	82.3278	100	coherent
WBGene00106707	TRINITY_DN7101_c0_g1_i3.p1	1	100	97.3804	100	coherent
WBGene00106725	TRINITY_DN31160_c0_g1_i1.p1	1	100	99.3952	100	coherent
WBGene00106749	TRINITY_DN28889_c0_g1_i1.p2	1	100	97.6861	100	coherent
WBGene00106787	TRINITY_DN24384_c0_g1_i1.p1	1	100	98.2249	100	coherent
WBGene00107004	TRINITY_DN8641_c0_g1_i1.p1	1	100	99.6786	100	coherent
WBGene00107315	TRINITY_DN11027_c0_g1_i1.p1	1	100	96.1725	100	coherent
WBGene00107625	TRINITY_DN27335_c0_g1_i1.p1	1	100	94.813	100	coherent
WBGene00107927	TRINITY_DN26535_c0_g1_i1.p1	1	100	98.2924	100	coherent
WBGene00108056	TRINITY_DN9852_c0_g2_i1.p1	1	100	96.1262	100	coherent
WBGene00108100	TRINITY_DN549_c0_g1_i1.p1	1	100	99.2247	100	coherent
WBGene00108158	TRINITY_DN17328_c0_g1_i4.p1	1	100	98.8729	100	coherent
WBGene00108177	TRINITY_DN2693_c0_g1_i2.p1	1	100	93.5619	100	coherent
WBGene00108260	TRINITY_DN7317_c0_g1_i1.p1	1	100	82.6184	100	coherent
WBGene00108268	TRINITY_DN3785_c0_g2_i1.p1	1	100	99.123	100	coherent
WBGene00108279	TRINITY_DN24798_c0_g1_i1.p1	1	100	93.4462	100	coherent
WBGene00108391	TRINITY_DN5185_c0_g2_i2.p1	1	100	98.1809	100	coherent
WBGene00109150	TRINITY_DN5698_c0_g1_i1.p1	1	100	91.4315	100	coherent
WBGene00109947	TRINITY_DN9872_c0_g2_i1.p1	1	100	98.6721	100	coherent
WBGene00110518	TRINITY_DN24470_c0_g1_i1.p1	1	100	96.0067	100	coherent
WBGene00110525	TRINITY_DN10_c0_g2_i2.p1	1	100	99.3521	100	coherent
WBGene00110868	TRINITY_DN6587_c0_g1_i1.p1	1	100	99.2535	100	coherent
WBGene00110928	TRINITY_DN12835_c0_g1_i1.p1	1	100	97.1067	100	coherent
WBGene00111223	TRINITY_DN24806_c0_g1_i1.p1	1	100	96.745	100	coherent
WBGene00111557	TRINITY_DN17343_c0_g1_i1.p1	1	100	99.4635	100	coherent
WBGene00112013	TRINITY_DN29000_c0_g1_i1.p1	1	100	95.8653	100	coherent
WBGene00112017	TRINITY_DN25191_c0_g1_i1.p1	1	100	98.8175	100	coherent
WBGene00112366	TRINITY_DN24510_c0_g1_i1.p1	1	100	99.658	100	coherent
WBGene00112566	TRINITY_DN5550_c0_g1_i2.p1	1	100	94.897	100	coherent
WBGene00112572	TRINITY_DN2406_c0_g2_i1.p1	1	100	80.796	100	coherent
WBGene00112953	TRINITY_DN32252_c0_g1_i1.p1	1	100	97.3787	100	coherent
WBGene00112986	TRINITY_DN222_c1_g1_i1.p1	1	100	94.3339	100	coherent
WBGene00113315	TRINITY_DN1390_c0_g1_i2.p1	1	100	97.1286	100	coherent
WBGene00113498	TRINITY_DN24593_c0_g1_i1.p1	1	100	98.6695	100	coherent
WBGene00114072	TRINITY_DN29512_c0_g1_i1.p1	1	100	90.258	100	coherent
WBGene00114438	TRINITY_DN2779_c0_g1_i1.p1	1	100	96.4101	100	coherent
WBGene00114457	TRINITY_DN23751_c0_g1_i1.p1	1	100	95.5334	100	coherent
WBGene00114515	TRINITY_DN33871_c0_g1_i1.p1	1	100	91.4095	100	coherent
WBGene00114710	TRINITY_DN86_c0_g2_i2.p1	1	100	98.1033	100	coherent
WBGene00114739	TRINITY_DN7065_c0_g2_i1.p1	1	100	98.2232	100	coherent
WBGene00114741	TRINITY_DN8235_c0_g5_i2.p1	1	100	95.5267	100	coherent
WBGene00114828	TRINITY_DN2662_c0_g1_i1.p1	1	100	98.2174	100	coherent
WBGene00114879	TRINITY_DN1809_c0_g1_i1.p2	1	100	86.4485	100	coherent
WBGene00114968	TRINITY_DN871_c0_g1_i2.p2	1	100	85.1615	100	coherent
WBGene00115296	TRINITY_DN7513_c0_g1_i1.p1	1	100	97.3977	100	coherent
WBGene00115422	TRINITY_DN4992_c0_g1_i2.p1	1	100	91.6786	100	coherent
WBGene00115602	TRINITY_DN24380_c0_g1_i1.p1	1	100	98.885	100	coherent
WBGene00115899	TRINITY_DN8900_c0_g2_i1.p1	1	100	98.5817	100	coherent
WBGene00116388	TRINITY_DN9329_c0_g1_i1.p2	1	100	99.4943	100	coherent
WBGene00116825	TRINITY_DN28912_c0_g1_i1.p1	1	100	97.994	100	coherent
WBGene00117715	TRINITY_DN5567_c0_g1_i1.p2	1	100	95.4553	100	coherent
WBGene00117863	TRINITY_DN7718_c0_g1_i1.p1	1	100	98.537	100	coherent
WBGene00118063	TRINITY_DN24458_c0_g1_i1.p1	1	100	98.3875	100	coherent
WBGene00118692	TRINITY_DN4561_c0_g2_i2.p1	1	100	82.8664	100	coherent
WBGene00118912	TRINITY_DN38_c0_g4_i1.p1	1	100	98.9795	100	coherent
[truncated: 4,200 more rows]
