# Supplementary material for: Nematode gene annotation by machine-learning-assisted proteotranscriptomics enables proteome-wide evolutionary analysis
Source: HighWire-hosted journal article supplement (doi:10.1101/gr.277070.122), 2023-01-01
Supplement: Supplemental_Table_S8.xlsx [file Supplemental_Table_S8.xlsx]

## Sheet: Legend
Supplemental_Table_S8
Enrichment analysis for ortholog groups encompassing all 12 species or all Caenorhabditis species
Sheet 1 shows Enrichment analysis of ortholog groups encompassing all 12 species
Sheet 2 shows Enrichment analysis of ortholog groups encompassing all Caenorhabditis species
Sheet 3 shows Enrichment analysis of ortholog groups encompassing all 12 species provided by STRINGdb
Sheet 4 shows Enrichment analysis of ortholog groups encompassing all Caenorhabditis species provided by STRINGdb

## Sheet: Enrichment_analysis_PO_12_speci
Relevant genes in term	bckgr-genes in term	Relevant genes not in term	bckgr-genes not in term	p.value	fc	p.value_adj	names	annotation	Term	Name	Species
350	799	2750	11775	1.8459e-19	1.87566	2.35679e-17	GO@GO:0005737	GO	GO:0005737	cytoplasm	Rhabditida
391	1292	2704	11225	0.000146645	1.25628	0.00339428	GO@GO:0005515	GO	GO:0005515	protein binding	Rhabditida
86	252	3134	12452	0.010837	1.3559	0.122125	GO@GO:0004672	GO	GO:0004672	protein kinase activity	Rhabditida
47	120	3183	12610	0.00865967	1.5516	0.101106	GO@GO:0004674	GO	GO:0004674	protein serine/threonine kinase activity	Rhabditida
89	269	3129	12433	0.0175577	1.31462	0.176407	GO@GO:0006468	GO	GO:0006468	protein phosphorylation	Rhabditida
249	456	2892	12201	8.46884e-23	2.30359	1.39665e-20	GO@GO:0005524	GO	GO:0005524	ATP binding	Rhabditida
29	37	3207	12703	1.10028e-05	3.1042	0.000331171	KEGG@cel04010	KEGG	cel04010	MAPK signaling pathway	Rhabditida
17	20	3221	12723	0.000379553	3.35751	0.00758723	KEGG@cel04012	KEGG	cel04012	ErbB signaling pathway	Rhabditida
16	25	3220	12718	0.00442584	2.52762	0.0617901	KEGG@cel04020	KEGG	cel04020	Calcium signaling pathway	Rhabditida
14	22	3220	12721	0.00778963	2.51385	0.0966501	KEGG@cel04070	KEGG	cel04070	Phosphatidylinositol signaling system	Rhabditida
13	15	3225	12728	0.00163003	3.42036	0.0265377	KEGG@cel04150	KEGG	cel04150	mTOR signaling pathway	Rhabditida
23	29	3211	12708	7.69488e-05	3.13841	0.00192153	KEGG@cel04310	KEGG	cel04310	Wnt signaling pathway	Rhabditida
88	256	3124	12450	0.00821689	1.36991	0.0971885	GO@GO:0055085	GO	GO:0055085	transmembrane transport	Rhabditida
185	339	2984	12351	6.5023e-17	2.25865	7.45974e-15	GO@GO:0000166	GO	GO:0000166	nucleotide binding	Rhabditida
10	17	3226	12726	0.0328254	2.32034	0.269021	GO@GO:0070588	GO	GO:0070588	calcium ion transmembrane transport	Rhabditida
51	82	3167	12632	1.01683e-06	2.48056	3.62579e-05	GO@GO:0009792	GO	GO:0009792	embryo development ending in birth or egg hatching	Rhabditida
136	429	3059	12239	0.0113359	1.26836	0.125679	GO@GO:0005886	GO	GO:0005886	plasma membrane	Rhabditida
37	52	3181	12679	3.24831e-06	2.83584	0.00010942	GO@GO:0002119	GO	GO:0002119	nematode larval development	Rhabditida
21	44	3205	12696	0.014583	1.89047	0.153918	GO@GO:0006897	GO	GO:0006897	endocytosis	Rhabditida
4	2	3234	12742	0.017753	7.87861	0.176407	GO@GO:0008195	GO	GO:0008195	phosphatidate phosphatase activity	Rhabditida
3	1	3235	12743	0.0281938	11.8112	0.241582	GO@GO:0042577	GO	GO:0042577	lipid phosphatase activity	Rhabditida
3	1	3235	12743	0.0281938	11.8112	0.241582	GO@GO:0046839	GO	GO:0046839	phospholipid dephosphorylation	Rhabditida
17	9	3218	12734	7.33067e-07	7.47324	2.75022e-05	KEGG@cel00561	KEGG	cel00561	Glycerolipid metabolism	Rhabditida
27	19	3207	12723	1.19257e-08	5.63685	6.05151e-07	KEGG@cel00564	KEGG	cel00564	Glycerophospholipid metabolism	Rhabditida
6	3	3232	12738	0.00328142	7.88101	0.0468031	KEGG@cel00565	KEGG	cel00565	Ether lipid metabolism	Rhabditida
13	12	3221	12731	0.000412878	4.28135	0.00801064	KEGG@cel00600	KEGG	cel00600	Sphingolipid metabolism	Rhabditida
319	242	2838	12471	1.92624e-86	5.79163	5.08272e-83	KEGG@cel01100	KEGG	cel01100	Metabolic pathways	Rhabditida
4	3	3234	12741	0.0348256	5.25219	0.269021	GO@GO:0004114	GO	GO:0004114	3',5'-cyclic-nucleotide phosphodiesterase activity	Rhabditida
40	53	3191	12688	4.88145e-07	3.00058	1.91295e-05	KEGG@cel00230	KEGG	cel00230	Purine metabolism	Rhabditida
182	614	2971	12020	0.0214489	1.19923	0.202559	GO@GO:0046872	GO	GO:0046872	metal ion binding	Rhabditida
15	14	3210	12729	0.000156754	4.24814	0.00355547	GO@GO:0000287	GO	GO:0000287	magnesium ion binding	Rhabditida
28	20	3201	12717	7.58633e-09	5.56113	4.00356e-07	GO@GO:0005768	GO	GO:0005768	endosome	Rhabditida
8	11	3229	12730	0.0249752	2.86695	0.232397	GO@GO:0005802	GO	GO:0005802	trans-Golgi network	Rhabditida
7	4	3230	12740	0.00211696	6.90132	0.0320051	GO@GO:0015914	GO	GO:0015914	phospholipid transport	Rhabditida
3	1	3234	12743	0.0281742	11.8149	0.241582	GO@GO:0045332	GO	GO:0045332	phospholipid translocation	Rhabditida
11	20	3222	12721	0.035276	2.17139	0.269021	GO@GO:0016324	GO	GO:0016324	apical plasma membrane	Rhabditida
44	89	3180	12642	0.000324648	1.9654	0.00678077	GO@GO:0005794	GO	GO:0005794	Golgi apparatus	Rhabditida
6	6	3230	12737	0.0205591	3.94289	0.196009	GO@GO:0007040	GO	GO:0007040	lysosome organization	Rhabditida
13	13	3216	12728	0.000666003	3.95725	0.0121513	GO@GO:0005769	GO	GO:0005769	early endosome	Rhabditida
30	29	3199	12706	1.55474e-07	4.10834	6.79964e-06	GO@GO:0031410	GO	GO:0031410	cytoplasmic vesicle	Rhabditida
23	52	3212	12681	0.0213443	1.74616	0.202107	GO@GO:0030054	GO	GO:0030054	cell junction	Rhabditida
58	66	3158	12664	2.16477e-11	3.52369	1.47727e-09	GO@GO:0005525	GO	GO:0005525	GTP binding	Rhabditida
60	60	3160	12671	2.68263e-13	4.00934	2.1669e-11	GO@GO:0015031	GO	GO:0015031	protein transport	Rhabditida
11	21	3220	12716	0.0441507	2.06851	0.28908	GO@GO:0010008	GO	GO:0010008	endosome membrane	Rhabditida
4	2	3232	12741	0.0177254	7.88287	0.176407	GO@GO:0016197	GO	GO:0016197	endosomal transport	Rhabditida
65	62	3149	12663	6.08462e-15	4.21534	5.87389e-13	GO@GO:0016887	GO	GO:0016887	ATPase	Rhabditida
13	14	3218	12726	0.00105399	3.67176	0.0184998	GO@GO:0012505	GO	GO:0012505	endomembrane system	Rhabditida
55	45	3176	12691	1.59596e-14	4.88322	1.52212e-12	KEGG@cel04144	KEGG	cel04144	Endocytosis	Rhabditida
4	2	3227	12739	0.0176544	7.89384	0.176407	GO@GO:0046961	GO	GO:0046961	proton-transporting ATPase activity, rotational mechanism	Rhabditida
13	15	3214	12723	0.00159273	3.43069	0.0265377	GO@GO:1902600	GO	GO:1902600	proton transmembrane transport	Rhabditida
19	36	3210	12700	0.00931103	2.08803	0.108232	GO@GO:0040011	GO	GO:0040011	locomotion	Rhabditida
49	28	3176	12713	1.21259e-16	7.00377	1.31491e-14	KEGG@cel00190	KEGG	cel00190	Oxidative phosphorylation	Rhabditida
33	38	3199	12702	5.6966e-07	3.44801	2.2105e-05	KEGG@cel04142	KEGG	cel04142	Lysosome	Rhabditida
27	16	3207	12727	1.44606e-09	6.69575	7.8945e-08	KEGG@cel04145	KEGG	cel04145	Phagosome	Rhabditida
69	195	3142	12518	0.0106656	1.40972	0.122008	GO@GO:0006508	GO	GO:0006508	proteolysis	Rhabditida
15	33	3214	12708	0.0473284	1.79717	0.305339	GO@GO:0043547	GO	GO:0043547	positive regulation of GTPase activity	Rhabditida
18	38	3216	12695	0.0244321	1.86971	0.228611	GO@GO:0005085	GO	GO:0005085	guanyl-nucleotide exchange factor activity	Rhabditida
9	12	3227	12729	0.0155734	2.95811	0.163717	GO@GO:0007264	GO	GO:0007264	small GTPase mediated signal transduction	Rhabditida
25	48	3208	12683	0.00363334	2.05909	0.0516364	GO@GO:0050790	GO	GO:0050790	regulation of catalytic activity	Rhabditida
338	1033	2789	11479	5.92977e-06	1.34668	0.000189274	GO@GO:0005634	GO	GO:0005634	nucleus	Rhabditida
6	5	3231	12738	0.0123897	4.73029	0.133267	GO@GO:0030136	GO	GO:0030136	clathrin-coated vesicle	Rhabditida
3	1	3234	12743	0.0281742	11.8149	0.241582	GO@GO:0048268	GO	GO:0048268	clathrin coat assembly	Rhabditida
9	15	3228	12726	0.0388806	2.36527	0.269021	GO@GO:0030276	GO	GO:0030276	clathrin binding	Rhabditida
6	8	3231	12735	0.0463098	2.95584	0.299259	GO@GO:0005200	GO	GO:0005200	structural constituent of cytoskeleton	Rhabditida
150	419	3026	12257	0.000120246	1.45004	0.00285847	GO@GO:0016740	GO	GO:0016740	transferase activity	Rhabditida
13	23	3219	12714	0.0198999	2.2323	0.194239	GO@GO:0016779	GO	GO:0016779	nucleotidyltransferase activity	Rhabditida
4	2	3233	12741	0.0177412	7.88043	0.176407	GO@GO:0005978	GO	GO:0005978	glycogen biosynthetic process	Rhabditida
5	3	3231	12740	0.0109761	6.57068	0.122125	GO@GO:0005977	GO	GO:0005977	glycogen metabolic process	Rhabditida
102	138	3101	12571	1.72108e-15	2.99599	1.74668e-13	GO@GO:0005783	GO	GO:0005783	endoplasmic reticulum	Rhabditida
28	49	3205	12687	0.000752073	2.26187	0.0135613	GO@GO:0055120	GO	GO:0055120	striated muscle dense body	Rhabditida
6	7	3229	12733	0.031743	3.37997	0.267294	GO@GO:0030017	GO	GO:0030017	sarcomere	Rhabditida
6	4	3231	12737	0.00679124	5.91228	0.0894581	KEGG@cel00500	KEGG	cel00500	Starch and sucrose metabolism	Rhabditida
15	9	3218	12733	7.62105e-06	6.5936	0.000236581	KEGG@cel00520	KEGG	cel00520	Amino sugar and nucleotide sugar metabolism	Rhabditida
86	49	3127	12687	2.54831e-28	7.11965	5.60345e-26	KEGG@cel01130	KEGG	cel01130	Biosynthesis of antibiotics	Rhabditida
10	13	3227	12727	0.00976194	3.03345	0.112319	GO@GO:0007030	GO	GO:0007030	Golgi organization	Rhabditida
14	20	3221	12718	0.00430491	2.76348	0.0602079	GO@GO:0005765	GO	GO:0005765	lysosomal membrane	Rhabditida
26	42	3207	12692	0.000475006	2.44977	0.00908248	GO@GO:0005764	GO	GO:0005764	lysosome	Rhabditida
3	0	3234	12743	0.00830571	Inf	0.0971885	GO@GO:0007041	GO	GO:0007041	lysosomal transport	Rhabditida
6	6	3230	12738	0.020553	3.9432	0.196009	KEGG@cel04340	KEGG	cel04340	Hedgehog signaling pathway	Rhabditida
75	47	3128	12667	1.71962e-23	6.46099	2.89629e-21	GO@GO:0006412	GO	GO:0006412	translation	Rhabditida
3	0	3235	12744	0.00831029	Inf	0.0971885	GO@GO:0016307	GO	GO:0016307	phosphatidylinositol phosphate kinase activity	Rhabditida
4	1	3233	12743	0.00704348	15.7615	0.0894581	GO@GO:0046488	GO	GO:0046488	phosphatidylinositol metabolic process	Rhabditida
8	9	3227	12732	0.0117499	3.50686	0.129509	GO@GO:0046854	GO	GO:0046854	phosphatidylinositol phosphate biosynthetic process	Rhabditida
12	16	3222	12727	0.00545046	2.96223	0.0733773	KEGG@cel00562	KEGG	cel00562	Inositol phosphate metabolism	Rhabditida
1180	3010	2058	9734	1.79856e-47	1.8542	8.89836e-45	phenotype@0000059	phenotype	59	larval arrest	Rhabditida
371	487	2867	12257	7.19459e-56	3.25657	5.17749e-53	phenotype@0000643	phenotype	643	locomotion variant	Rhabditida
1442	3667	1796	9077	9.05329e-64	1.98736	8.95823e-61	phenotype@0000689	phenotype	689	maternal sterile	Rhabditida
1165	3025	2073	9719	1.60345e-43	1.8056	7.0516e-41	phenotype@0000031	phenotype	31	slow growth	Rhabditida
1040	3256	2198	9488	6.45874e-14	1.37877	5.80993e-12	phenotype@0000049	phenotype	49	postembryonic development variant	Rhabditida
1500	3722	1738	9022	4.80246e-74	2.09195	7.60326e-71	phenotype@0000050	phenotype	50	embryonic lethal	Rhabditida
999	2906	2239	9838	5.98007e-21	1.51046	8.76634e-19	phenotype@0000054	phenotype	54	larval lethal	Rhabditida
1352	3640	1886	9104	5.83421e-46	1.79293	2.71668e-43	phenotype@0000886	phenotype	886	nematode phenotype	Rhabditida
938	2889	2300	9855	9.14663e-14	1.39115	8.13536e-12	phenotype@0001037	phenotype	1037	sterile progeny	Rhabditida
184	177	3054	12567	2.20245e-39	4.27714	7.92483e-37	phenotype@0000032	phenotype	32	sick	Rhabditida
617	708	2621	12036	1.28821e-113	4.00145	1.01975e-109	phenotype@0000688	phenotype	688	sterile	Rhabditida
50	43	3188	12701	8.43e-13	4.63196	6.41653e-11	phenotype@0000730	phenotype	730	apoptosis variant	Rhabditida
95	93	3143	12651	1.5406e-20	4.11121	2.13954e-18	phenotype@0001180	phenotype	1180	accumulated germline cell corpses	Rhabditida
131	87	3107	12657	2.99785e-38	6.13301	1.03178e-35	phenotype@0001260	phenotype	1260	oocyte morphology variant	Rhabditida
74	53	3164	12691	4.99434e-21	5.59952	7.45946e-19	phenotype@0001355	phenotype	1355	gonad morphology variant	Rhabditida
60	35	3178	12709	9.25081e-20	6.85437	1.20048e-17	phenotype@0001810	phenotype	1810	oocyte septum formation variant	Rhabditida
98	67	3140	12677	2.45573e-28	5.90435	5.55416e-26	phenotype@0001940	phenotype	1940	rachis morphology variant	Rhabditida
54	20	3184	12724	1.89516e-22	10.7885	3.00042e-20	phenotype@0001956	phenotype	1956	oocytes lack nucleus	Rhabditida
56	20	3182	12724	1.39975e-23	11.1964	2.46232e-21	phenotype@0001971	phenotype	1971	germ cell compartment anucleate	Rhabditida
51	34	3187	12710	1.16946e-15	5.98119	1.20227e-13	phenotype@0001973	phenotype	1973	germ cell compartment size variant	Rhabditida
25	12	3213	12732	6.05954e-10	8.25401	3.45774e-08	phenotype@0001974	phenotype	1974	germ cell compartment small	Rhabditida
84	45	3154	12699	1.63149e-28	7.51446	3.7985e-26	phenotype@0001979	phenotype	1979	gonad vesiculated	Rhabditida
163	89	3075	12655	1.03149e-53	7.53594	6.80438e-51	phenotype@0001980	phenotype	1980	germ cell compartment expansion variant	Rhabditida
109	74	3129	12670	1.56505e-31	5.96347	4.5885e-29	phenotype@0001982	phenotype	1982	cell membrane organization biogenesis variant	Rhabditida
327	267	2911	12477	2.22656e-81	5.24861	4.40636e-78	phenotype@0001236	phenotype	1236	transgene expression increased	Rhabditida
67	61	3171	12683	6.85038e-16	4.39254	7.13521e-14	phenotype@0000120	phenotype	120	protein expression reduced	Rhabditida
31	31	3207	12713	1.65146e-07	3.96368	7.10487e-06	phenotype@0001577	phenotype	1577	mitochondria alignment variant	Rhabditida
56	70	3182	12674	6.54818e-10	3.18594	3.68932e-08	phenotype@0001889	phenotype	1889	body wall muscle sarcomere morphology variant	Rhabditida
24	28	3214	12716	2.30302e-05	3.39118	0.000646479	phenotype@0000716	phenotype	716	muscle cell attachment variant	Rhabditida
18	3	3215	12741	2.19625e-10	23.7871	1.33734e-08	KEGG@cel00630	KEGG	cel00630	Glyoxylate and dicarboxylate metabolism	Rhabditida
60	16	3161	12727	4.18958e-28	15.0933	8.96343e-26	KEGG@cel01200	KEGG	cel01200	Carbon metabolism	Rhabditida
1201	3054	2037	9690	3.36141e-49	1.87068	1.77393e-46	phenotype@0000062	phenotype	62	lethal	Rhabditida
1309	3543	1929	9201	7.39347e-43	1.76227	2.92634e-40	phenotype@0000535	phenotype	535	organism morphology variant	Rhabditida
326	333	2912	12411	8.22676e-66	4.17193	9.30329e-63	phenotype@0000154	phenotype	154	reduced brood size	Rhabditida
497	468	2741	12276	7.6993e-111	4.75557	3.04738e-107	phenotype@0000679	phenotype	679	transgene subcellular localization variant	Rhabditida
273	201	2965	12543	1.4755e-73	5.74485	1.94668e-70	phenotype@0001405	phenotype	1405	protein aggregation variant	Rhabditida
25	45	3213	12699	0.00190698	2.19566	0.0291985	phenotype@0000012	phenotype	12	dauer constitutive	Rhabditida
7	6	3229	12736	0.007504	4.60103	0.0941389	GO@GO:0050661	GO	GO:0050661	NADP binding	Rhabditida
6	7	3225	12737	0.0315634	3.38522	0.267294	GO@GO:0051287	GO	GO:0051287	NAD binding	Rhabditida
106	194	3066	12518	2.7896e-10	2.23071	1.68568e-08	GO@GO:0055114	GO	GO:0055114	NA	Rhabditida
19	12	3215	12732	7.01791e-07	6.2693	2.67086e-05	KEGG@cel00010	KEGG	cel00010	Glycolysis / Gluconeogenesis	Rhabditida
33	14	3193	12728	1.74523e-13	9.39421	1.45424e-11	KEGG@cel01230	KEGG	cel01230	Biosynthesis of amino acids	Rhabditida
53	95	3185	12649	7.56839e-06	2.21552	0.000235871	phenotype@0001183	phenotype	1183	fat content reduced	Rhabditida
161	192	3077	12552	1.80639e-27	3.42034	3.76299e-25	phenotype@0000039	phenotype	39	life span phenotype	Rhabditida
31	43	3207	12701	1.80314e-05	2.85492	0.000511601	phenotype@0002080	phenotype	2080	peptide uptake by intestinal cell variant	Rhabditida
170	179	3068	12565	2.83242e-33	3.88914	8.96858e-31	phenotype@0000061	phenotype	61	extended life span	Rhabditida
35	81	3203	12663	0.00715697	1.70823	0.0906473	phenotype@0001184	phenotype	1184	fat content increased	Rhabditida
92	158	3092	12557	4.4091e-10	2.36455	2.59472e-08	GO@GO:0016491	GO	GO:0016491	oxidoreductase activity	Rhabditida
16	16	3217	12725	0.000163512	3.95509	0.00368666	KEGG@cel00071	KEGG	cel00071	Fatty acid degradation	Rhabditida
26	7	3208	12735	8.0344e-13	14.7399	6.17478e-11	KEGG@cel00280	KEGG	cel00280	Valine	Rhabditida
26	7	3208	12735	8.0344e-13	14.7399	6.17478e-11	KEGG@ leucine and isoleucine degradation	KEGG	leucine and isoleucine degradation	NA	Rhabditida
13	15	3222	12726	0.00162041	3.423	0.0265377	KEGG@cel00310	KEGG	cel00310	Lysine degradation	Rhabditida
13	6	3221	12738	7.36444e-06	8.56686	0.000232259	KEGG@cel00330	KEGG	cel00330	Arginine and proline metabolism	Rhabditida
13	10	3222	12733	0.000137053	5.13674	0.00320033	KEGG@cel00380	KEGG	cel00380	Tryptophan metabolism	Rhabditida
15	3	3222	12741	1.68088e-08	19.7667	8.36843e-07	KEGG@cel00410	KEGG	cel00410	beta-Alanine metabolism	Rhabditida
14	4	3218	12739	2.50511e-07	13.8503	1.04371e-05	KEGG@cel00620	KEGG	cel00620	Pyruvate metabolism	Rhabditida
7	7	3231	12736	0.0124412	3.94136	0.133267	GO@GO:0030672	GO	GO:0030672	synaptic vesicle membrane	Rhabditida
4	2	3233	12742	0.0177372	7.88105	0.176407	GO@GO:0016081	GO	GO:0016081	synaptic vesicle docking	Rhabditida
32	64	3188	12673	0.00169615	1.9876	0.0265377	GO@GO:0018215	GO	GO:0018215	protein phosphopantetheinylation	Rhabditida
28	41	3208	12696	8.89614e-05	2.70251	0.00218024	KEGG@cel04120	KEGG	cel04120	Ubiquitin mediated proteolysis	Rhabditida
20	46	3213	12690	0.0341587	1.71714	0.269021	GO@GO:0051015	GO	GO:0051015	actin filament binding	Rhabditida
13	25	3224	12714	0.0315856	2.0506	0.267294	GO@GO:0005912	GO	GO:0005912	adherens junction	Rhabditida
10	17	3227	12720	0.0329553	2.31853	0.269021	GO@GO:0015629	GO	GO:0015629	actin cytoskeleton	Rhabditida
48	64	3171	12669	3.84877e-08	2.99613	1.82436e-06	GO@GO:0003924	GO	GO:0003924	GTPase activity	Rhabditida
9	14	3227	12727	0.0294101	2.53519	0.250334	GO@GO:0000226	GO	GO:0000226	microtubule cytoskeleton organization	Rhabditida
7	9	3231	12735	0.028425	3.06527	0.242209	phenotype@0000748	phenotype	748	asymmetric cell division defective early emb	Rhabditida
4	1	3234	12743	0.0070501	15.7566	0.0894581	phenotype@0000766	phenotype	766	centrosome pair and associated pronuclear rotation variant	Rhabditida
17	16	3221	12728	6.39313e-05	4.19803	0.00162727	phenotype@0001152	phenotype	1152	pronuclear migration defective early emb	Rhabditida
17	16	3221	12728	6.39313e-05	4.19803	0.00162727	phenotype@0001224	phenotype	1224	axon outgrowth variant	Rhabditida
3	1	3235	12743	0.0281938	11.8112	0.241582	phenotype@0001353	phenotype	1353	centration defective early emb	Rhabditida
20	17	3218	12727	5.59263e-06	4.65226	0.000179236	phenotype@0002501	phenotype	2501	ectopic cleavage furrow early emb	Rhabditida
3	1	3235	12743	0.0281938	11.8112	0.241582	phenotype@0000782	phenotype	782	body wall muscle thick filament variant	Rhabditida
10	7	3228	12737	0.000546114	5.636	0.01022	phenotype@0000034	phenotype	34	embryonic polarity variant	Rhabditida
25	24	3213	12720	1.59123e-06	4.12338	5.56665e-05	phenotype@0001102	phenotype	1102	mitotic spindle defective early emb	Rhabditida
10	10	3228	12734	0.00285287	3.9444	0.0412857	phenotype@0001681	phenotype	1681	spindle orientation variant	Rhabditida
48	35	3190	12709	5.89797e-14	5.46299	5.36648e-12	phenotype@0000195	phenotype	195	distal tip cell migration variant	Rhabditida
21	13	3217	12731	1.5205e-07	6.39172	6.68683e-06	phenotype@0000274	phenotype	274	dead eggs laid	Rhabditida
99	137	3139	12607	1.89329e-14	2.90198	1.7842e-12	phenotype@0000531	phenotype	531	organism development variant	Rhabditida
228	211	3010	12533	1.54614e-50	4.49869	8.74231e-48	phenotype@0000697	phenotype	697	protruding vulva	Rhabditida
10	3	3228	12741	1.79492e-05	13.1515	0.000511099	phenotype@0000666	phenotype	666	ovulation variant	Rhabditida
10	5	3228	12739	0.000125949	7.89139	0.00296731	phenotype@0000774	phenotype	774	gametogenesis variant	Rhabditida
122	130	3116	12614	6.90376e-24	3.7986	1.24205e-21	phenotype@0000038	phenotype	38	exploded through vulva	Rhabditida
32	74	3206	12670	0.00972905	1.70889	0.112319	phenotype@0000823	phenotype	823	germline proliferation variant	Rhabditida
15	5	3223	12739	2.10978e-07	11.8514	8.85841e-06	phenotype@0000761	phenotype	761	spindle position orientation defective early emb	Rhabditida
3	1	3235	12743	0.0281938	11.8112	0.241582	phenotype@0001158	phenotype	1158	pronuclear breakdown asynchronous early emb	Rhabditida
9	15	3229	12729	0.0388939	2.3651	0.269021	phenotype@0001588	phenotype	1588	microtubule organization biogenesis variant	Rhabditida
114	48	3124	12696	2.0809e-43	9.65007	8.66971e-41	phenotype@0002094	phenotype	2094	RAB-11 recycling endosome morphology variant	Rhabditida
62	30	3176	12714	1.36139e-22	8.27165	2.19934e-20	phenotype@0002107	phenotype	2107	RAB-11 recycling endosome localization variant	Rhabditida
262	227	2976	12517	1.04749e-61	4.85383	9.21326e-59	phenotype@0000961	phenotype	961	pattern of transgene expression variant	Rhabditida
65	65	3173	12679	3.28848e-14	3.99544	3.06254e-12	phenotype@0000691	phenotype	691	gonad development variant	Rhabditida
60	47	3178	12697	3.19239e-16	5.09965	3.41499e-14	phenotype@0000188	phenotype	188	gonad arm morphology variant	Rhabditida
86	75	3152	12669	9.2124e-21	4.60826	1.32591e-18	phenotype@0000291	phenotype	291	no oocytes	Rhabditida
53	47	3185	12697	3.75924e-13	4.49484	2.97581e-11	phenotype@0001675	phenotype	1675	male gonad development variant	Rhabditida
86	82	3152	12662	3.46468e-19	4.21258	4.35339e-17	phenotype@0000812	phenotype	812	germ cell development variant	Rhabditida
51	43	3187	12701	3.10175e-13	4.72607	2.48014e-11	phenotype@0002188	phenotype	2188	male somatic gonad development variant	Rhabditida
30	52	3208	12692	0.000445849	2.28238	0.00854562	phenotype@0001511	phenotype	1511	linker cell migration variant	Rhabditida
4	0	3234	12744	0.00168245	Inf	0.0265377	phenotype@0002590	phenotype	2590	linker cell detached	Rhabditida
193	276	3045	12468	8.9538e-26	2.86297	1.72874e-23	phenotype@0001278	phenotype	1278	transgene expression reduced	Rhabditida
83	59	3155	12685	1.5129e-23	5.65526	2.60351e-21	phenotype@0002460	phenotype	2460	no induction of antimicrobial peptide expression after infection	Rhabditida
7	2	3231	12742	0.000340187	13.7979	0.0068768	phenotype@0001840	phenotype	1840	response to injury variant	Rhabditida
4	3	3234	12741	0.0348256	5.25219	0.269021	phenotype@0001591	phenotype	1591	microtubule polymerization variant	Rhabditida
18	16	3220	12728	2.4048e-05	4.44633	0.000667945	phenotype@0000772	phenotype	772	sister chromatid segregation defective early emb	Rhabditida
4	3	3234	12741	0.0348256	5.25219	0.269021	GO@GO:0046928	GO	GO:0046928	regulation of neurotransmitter secretion	Rhabditida
107	200	3089	12477	9.22847e-10	2.16086	5.14455e-08	GO@GO:0003723	GO	GO:0003723	RNA binding	Rhabditida
86	195	3124	12496	1.96711e-05	1.76403	0.000556129	GO@GO:0003676	GO	GO:0003676	nucleic acid binding	Rhabditida
79	99	3112	12617	1.35055e-13	3.23465	1.17483e-11	GO@GO:0003824	GO	GO:0003824	catalytic activity	Rhabditida
5	5	3228	12739	0.0343269	3.94595	0.269021	GO@GO:0006096	GO	GO:0006096	glycolytic process	Rhabditida
85	165	3110	12533	1.56964e-07	2.07595	6.82708e-06	GO@GO:0005829	GO	GO:0005829	cytosol	Rhabditida
4	2	3234	12742	0.017753	7.87861	0.176407	GO@GO:0015379	GO	GO:0015379	potassium:chloride symporter activity	Rhabditida
4	2	3234	12742	0.017753	7.87861	0.176407	GO@GO:0055064	GO	GO:0055064	chloride ion homeostasis	Rhabditida
4	2	3234	12742	0.017753	7.87861	0.176407	GO@GO:0055075	GO	GO:0055075	potassium ion homeostasis	Rhabditida
7	5	3229	12739	0.00418839	5.52245	0.0588542	GO@GO:1990573	GO	GO:1990573	potassium ion import across plasma membrane	Rhabditida
3	1	3235	12743	0.0281938	11.8112	0.241582	GO@GO:0032228	GO	GO:0032228	regulation of synaptic transmission, GABAergic	Rhabditida
5	4	3232	12740	0.0206239	4.92662	0.196009	GO@GO:0007266	GO	GO:0007266	Rho protein signal transduction	Rhabditida
162	311	3023	12376	1.72853e-13	2.13244	1.45424e-11	GO@GO:0016787	GO	GO:0016787	hydrolase activity	Rhabditida
17	24	3217	12716	0.001566	2.79967	0.0262082	KEGG@cel04068	KEGG	cel04068	FoxO signaling pathway	Rhabditida
6	5	3230	12737	0.0123784	4.73139	0.133267	KEGG@cel04320	KEGG	cel04320	Dorso-ventral axis formation	Rhabditida
15	23	3218	12713	0.00508133	2.57628	0.0685243	GO@GO:0106310	GO	GO:0106310	protein serine kinase activity	Rhabditida
15	23	3218	12713	0.00508133	2.57628	0.0685243	GO@GO:0106311	GO	GO:0106311	protein threonine kinase activity	Rhabditida
5	3	3229	12740	0.0109523	6.57475	0.122125	GO@GO:0040026	GO	GO:0040026	positive regulation of vulval development	Rhabditida
11	18	3225	12721	0.0214688	2.41036	0.202559	GO@GO:0006812	GO	GO:0006812	cation transport	Rhabditida
46	86	3179	12643	6.01361e-05	2.12717	0.00155061	GO@GO:0006629	GO	GO:0006629	lipid metabolic process	Rhabditida
3	1	3235	12743	0.0281938	11.8112	0.241582	GO@GO:0042136	GO	GO:0042136	neurotransmitter biosynthetic process	Rhabditida
6	5	3231	12736	0.0123974	4.72955	0.133267	GO@GO:0008092	GO	GO:0008092	cytoskeletal protein binding	Rhabditida
6	8	3231	12735	0.0463098	2.95584	0.299259	GO@GO:0004620	GO	GO:0004620	phospholipase activity	Rhabditida
8	10	3227	12733	0.0174433	3.15619	0.176407	GO@GO:0042803	GO	GO:0042803	protein homodimerization activity	Rhabditida
4	2	3234	12742	0.017753	7.87861	0.176407	GO@GO:0030165	GO	GO:0030165	PDZ domain binding	Rhabditida
144	158	3094	12586	4.02731e-27	3.70702	8.1744e-25	phenotype@0001171	phenotype	1171	shortened life span	Rhabditida
56	38	3182	12706	7.37322e-17	5.88365	8.33806e-15	phenotype@0001719	phenotype	1719	unfolded protein response variant	Rhabditida
31	36	3193	12703	1.34737e-06	3.4257	4.76151e-05	GO@GO:0016746	GO	GO:0016746	acyltransferase activity	Rhabditida
21	46	3209	12676	0.0211279	1.80325	0.200297	GO@GO:0003729	GO	GO:0003729	mRNA binding	Rhabditida
41	49	3187	12682	5.05014e-08	3.32961	2.33783e-06	GO@GO:0006397	GO	GO:0006397	mRNA processing	Rhabditida
34	37	3197	12694	1.58405e-07	3.64826	6.85208e-06	GO@GO:0000398	GO	GO:0000398	mRNA splicing, via spliceosome	Rhabditida
48	50	3182	12687	1.73101e-10	3.8272	1.09621e-08	KEGG@cel03040	KEGG	cel03040	Spliceosome	Rhabditida
5	5	3233	12739	0.0344973	3.93985	0.269021	phenotype@0000132	phenotype	132	pheromone induced dauer formation variant	Rhabditida
7	7	3231	12737	0.0124368	3.94167	0.133267	phenotype@0000256	phenotype	256	amphid neuron morphology variant	Rhabditida
212	144	3026	12600	1.58486e-60	6.12926	1.25457e-57	phenotype@0001425	phenotype	1425	receptor mediated endocytosis defective	Rhabditida
15	20	3217	12715	0.00196402	2.96404	0.0299561	GO@GO:0008152	GO	GO:0008152	metabolic process	Rhabditida
18	17	3215	12723	3.96068e-05	4.18967	0.00107372	KEGG@cel01212	KEGG	cel01212	Fatty acid metabolism	Rhabditida
26	20	3205	12720	6.41924e-08	5.15871	2.93727e-06	KEGG@cel04146	KEGG	cel04146	Peroxisome	Rhabditida
16	16	3220	12723	0.000165266	3.95079	0.00370384	GO@GO:0043161	GO	GO:0043161	proteasome-mediated ubiquitin-dependent protein catabolic process	Rhabditida
40	42	3187	12695	6.41706e-09	3.79326	3.40922e-07	GO@GO:0016192	GO	GO:0016192	vesicle-mediated transport	Rhabditida
14	29	3218	12700	0.0396123	1.90506	0.269021	GO@GO:0007049	GO	GO:0007049	cell cycle	Rhabditida
4	2	3232	12740	0.0177294	7.88225	0.176407	GO@GO:0012501	GO	GO:0012501	programmed cell death	Rhabditida
6	8	3229	12736	0.046197	2.9579	0.299259	GO@GO:0004601	GO	GO:0004601	peroxidase activity	Rhabditida
12	17	3221	12725	0.00759957	2.78857	0.0947373	GO@GO:0006979	GO	GO:0006979	response to oxidative stress	Rhabditida
11	17	3224	12724	0.0161863	2.55353	0.169934	GO@GO:0030173	GO	GO:0030173	integral component of Golgi membrane	Rhabditida
4	2	3231	12738	0.0177216	7.88345	0.176407	GO@GO:0003756	GO	GO:0003756	protein disulfide isomerase activity	Rhabditida
19	18	3202	12721	2.38391e-05	4.19303	0.000666822	GO@GO:0006457	GO	GO:0006457	protein folding	Rhabditida
10	4	3225	12740	5.09998e-05	9.87398	0.00133539	KEGG@cel00051	KEGG	cel00051	Fructose and mannose metabolism	Rhabditida
5	5	3231	12738	0.0344377	3.94198	0.269021	GO@GO:0005385	GO	GO:0005385	zinc ion transmembrane transporter activity	Rhabditida
6	7	3229	12736	0.0317157	3.38077	0.267294	GO@GO:0046873	GO	GO:0046873	metal ion transmembrane transporter activity	Rhabditida
20	22	3209	12713	6.15172e-05	3.60113	0.00158107	GO@GO:0050660	GO	GO:0050660	flavin adenine dinucleotide binding	Rhabditida
15	16	3218	12727	0.000411778	3.70735	0.00800894	GO@GO:0051536	GO	GO:0051536	iron-sulfur cluster binding	Rhabditida
7	1	3230	12743	9.16327e-05	27.6186	0.00222877	GO@GO:0006807	GO	GO:0006807	nitrogen compound metabolic process	Rhabditida
4	3	3233	12739	0.0348111	5.25299	0.269021	GO@GO:0006541	GO	GO:0006541	glutamine metabolic process	Rhabditida
13	7	3220	12736	1.70919e-05	7.34424	0.000495601	KEGG@cel00250	KEGG	cel00250	Alanine	Rhabditida
13	7	3220	12736	1.70919e-05	7.34424	0.000495601	KEGG@ aspartate and glutamate metabolism	KEGG	aspartate and glutamate metabolism	NA	Rhabditida
4	3	3231	12741	0.0347373	5.25707	0.269021	KEGG@cel00910	KEGG	cel00910	Nitrogen metabolism	Rhabditida
14	22	3222	12721	0.00782458	2.51229	0.0969317	KEGG@cel04931	KEGG	cel04931	Insulin resistance	Rhabditida
42	30	3175	12704	1.25053e-12	5.60093	9.33885e-11	GO@GO:0005743	GO	GO:0005743	mitochondrial inner membrane	Rhabditida
12	5	3226	12739	1.041e-05	9.47536	0.000314525	phenotype@0001202	phenotype	1202	nicotine hypersensitive	Rhabditida
18	16	3220	12728	2.4048e-05	4.44633	0.000667945	phenotype@0000025	phenotype	25	blistered	Rhabditida
15	29	3221	12712	0.0224923	2.04131	0.211209	GO@GO:0042626	GO	GO:0042626	ATPase-coupled transmembrane transporter activity	Rhabditida
29	64	3201	12672	0.00816917	1.79374	0.0971885	GO@GO:0000139	GO	GO:0000139	Golgi membrane	Rhabditida
7	8	3227	12735	0.0192056	3.45296	0.18862	GO@GO:0005793	GO	GO:0005793	endoplasmic reticulum-Golgi intermediate compartment	Rhabditida
3	1	3234	12742	0.0281792	11.814	0.241582	GO@GO:0005801	GO	GO:0005801	cis-Golgi network	Rhabditida
4	3	3228	12738	0.0346715	5.26071	0.269021	GO@GO:0006414	GO	GO:0006414	translational elongation	Rhabditida
5	2	3227	12741	0.00491636	9.86864	0.0669999	GO@GO:0003746	GO	GO:0003746	translation elongation factor activity	Rhabditida
39	51	3186	12686	5.1771e-07	3.04456	2.01881e-05	KEGG@cel03013	KEGG	cel03013	RNA transport	Rhabditida
14	29	3224	12715	0.0397756	1.90376	0.269021	phenotype@0000684	phenotype	684	fewer germ cells	Rhabditida
56	25	3182	12719	2.2649e-21	8.95195	3.44787e-19	phenotype@0000900	phenotype	900	germ cell morphology variant	Rhabditida
17	31	3221	12713	0.0104994	2.16434	0.120454	phenotype@0001573	phenotype	1573	nicotine response variant	Rhabditida
79	48	3159	12696	5.9083e-25	6.6135	1.11357e-22	phenotype@0000182	phenotype	182	apoptosis reduced	Rhabditida
30	26	3208	12718	3.45928e-08	4.57379	1.66974e-06	phenotype@0000184	phenotype	184	apoptosis fails to occur	Rhabditida
85	42	3153	12702	3.78528e-30	8.15151	9.98809e-28	phenotype@0001361	phenotype	1361	chromosome condensation variant	Rhabditida
62	36	3176	12708	1.98311e-20	6.8899	2.70661e-18	phenotype@0001792	phenotype	1792	nuclei small	Rhabditida
118	58	3120	12686	1.65013e-41	8.27072	6.2202e-39	phenotype@0001941	phenotype	1941	rachis narrow	Rhabditida
39	14	3199	12730	8.665e-17	11.0853	9.66086e-15	phenotype@0001942	phenotype	1942	rachis absent	Rhabditida
108	79	3130	12665	1.26942e-29	5.53088	3.14023e-27	phenotype@0001944	phenotype	1944	oocyte number decreased	Rhabditida
32	28	3206	12716	1.40123e-08	4.53235	7.02032e-07	phenotype@0001946	phenotype	1946	pachytene progression during oogenesis variant	Rhabditida
98	55	3140	12689	3.58078e-32	7.19923	1.09021e-29	phenotype@0001951	phenotype	1951	pachytene region organization variant	Rhabditida
44	25	3194	12719	4.3961e-15	7.0074	4.29624e-13	phenotype@0001954	phenotype	1954	diplotene absent during oogenesis	Rhabditida
34	18	3204	12726	2.00007e-12	7.50118	1.46598e-10	phenotype@0001957	phenotype	1957	gonad small	Rhabditida
26	15	3212	12729	2.18635e-09	6.86796	1.1694e-07	phenotype@0001981	phenotype	1981	germ cell compartment expansion absent	Rhabditida
35	45	3203	12699	1.5963e-06	3.0833	5.56665e-05	phenotype@0000136	phenotype	136	mRNA levels increased	Rhabditida
26	38	3212	12706	0.000153696	2.70635	0.00349984	phenotype@0000137	phenotype	137	mRNA levels reduced	Rhabditida
13	7	3225	12737	1.73218e-05	7.33344	0.000496809	phenotype@0001350	phenotype	1350	protein phosphorylation increased	Rhabditida
29	22	3209	12722	9.60059e-09	5.22516	4.96721e-07	phenotype@0001663	phenotype	1663	organism oxidative stress resistant	Rhabditida
134	123	3104	12621	3.13165e-30	4.42911	8.54832e-28	phenotype@0000306	phenotype	306	transgene expression variant	Rhabditida
5	3	3233	12741	0.0109969	6.56713	0.122125	phenotype@0002009	phenotype	2009	proteasome core activity variant	Rhabditida
56	36	3182	12708	1.83497e-17	6.21146	2.16801e-15	phenotype@0000662	phenotype	662	foraging behavior variant	Rhabditida
100	133	3138	12611	2.33791e-15	3.02131	2.34265e-13	phenotype@0000229	phenotype	229	small	Rhabditida
6	6	3231	12734	0.0206018	3.94074	0.196009	GO@GO:0005921	GO	GO:0005921	gap junction	Rhabditida
3	1	3234	12741	0.0281842	11.813	0.241582	GO@GO:0090325	GO	GO:0090325	regulation of locomotion involved in locomotory behavior	Rhabditida
15	27	3218	12712	0.0143725	2.19449	0.1519	GO@GO:0018991	GO	GO:0018991	oviposition	Rhabditida
8	7	3230	12735	0.00459644	4.50539	0.0636108	GO@GO:0005911	GO	GO:0005911	cell-cell junction	Rhabditida
39	78	3191	12648	0.00060478	1.98182	0.0112646	GO@GO:0008233	GO	GO:0008233	peptidase activity	Rhabditida
8	10	3230	12734	0.0175129	3.15351	0.176407	KEGG@cel04140	KEGG	cel04140	Regulation of autophagy	Rhabditida
65	89	3173	12655	4.16715e-10	2.91256	2.49902e-08	phenotype@0000060	phenotype	60	adult lethal	Rhabditida
49	55	3189	12689	6.57142e-10	3.54456	3.68932e-08	phenotype@0000646	phenotype	646	sluggish	Rhabditida
17	19	3221	12725	0.000252312	3.53451	0.00542745	phenotype@0000711	phenotype	711	organism hypersensitive ionizing radiation	Rhabditida
31	52	3207	12692	0.000235988	2.35918	0.00514623	phenotype@0001918	phenotype	1918	chemical hypersensitive	Rhabditida
82	79	3156	12665	3.48477e-18	4.16488	4.17961e-16	phenotype@0000638	phenotype	638	molt defect	Rhabditida
12	16	3226	12728	0.00549317	2.95879	0.0737016	phenotype@0001036	phenotype	1036	sterile F1	Rhabditida
159	171	2999	12533	2.08036e-31	3.88535	5.88149e-29	GO@GO:0005739	GO	GO:0005739	mitochondrion	Rhabditida
20	19	3213	12717	1.5718e-05	4.1658	0.000464268	GO@GO:0042802	GO	GO:0042802	identical protein binding	Rhabditida
29	64	3192	12669	0.0079374	1.79837	0.0971885	GO@GO:0005975	GO	GO:0005975	carbohydrate metabolic process	Rhabditida
13	12	3219	12732	0.00041052	4.28434	0.00800413	GO@GO:0016616	GO	GO:0016616	oxidoreductase activity, acting on the CH-OH group of donors, NAD or NADP as acceptor	Rhabditida
13	11	3216	12730	0.000240251	4.67741	0.00522481	GO@GO:0051082	GO	GO:0051082	unfolded protein binding	Rhabditida
20	11	3211	12730	1.03049e-07	7.20694	4.60867e-06	GO@GO:0003743	GO	GO:0003743	translation initiation factor activity	Rhabditida
14	11	3218	12730	8.59633e-05	5.03405	0.00211331	GO@GO:0006413	GO	GO:0006413	translational initiation	Rhabditida
7	5	3230	12739	0.00419453	5.52074	0.0588542	GO@GO:0044237	GO	GO:0044237	cellular metabolic process	Rhabditida
31	71	3198	12655	0.00961434	1.7277	0.111594	GO@GO:0008340	GO	GO:0008340	determination of adult lifespan	Rhabditida
7	6	3229	12737	0.0075013	4.60139	0.0941389	GO@GO:0019915	GO	GO:0019915	lipid storage	Rhabditida
5	5	3231	12739	0.0344291	3.94229	0.269021	KEGG@cel00220	KEGG	cel00220	Arginine biosynthesis	Rhabditida
194	475	3044	12269	2.34129e-08	1.6461	1.14405e-06	phenotype@0000749	phenotype	749	embryonic development variant	Rhabditida
26	25	3212	12719	1.00611e-06	4.11774	3.60379e-05	phenotype@0000885	phenotype	885	engulfment variant	Rhabditida
9	8	3229	12736	0.00282071	4.43673	0.0409701	phenotype@0001911	phenotype	1911	axon regeneration defective	Rhabditida
60	82	3161	12641	1.64081e-09	2.92585	8.83583e-08	GO@GO:0005789	GO	GO:0005789	endoplasmic reticulum membrane	Rhabditida
4	3	3233	12739	0.0348111	5.25299	0.269021	GO@GO:0045296	GO	GO:0045296	cadherin binding	Rhabditida
3	1	3235	12743	0.0281938	11.8112	0.241582	GO@GO:0097112	GO	GO:0097112	gamma-aminobutyric acid receptor clustering	Rhabditida
4	1	3232	12743	0.00703688	15.7663	0.0894581	GO@GO:0051016	GO	GO:0051016	barbed-end actin filament capping	Rhabditida
101	155	3137	12589	1.02945e-12	2.61472	7.76109e-11	phenotype@0000640	phenotype	640	egg laying variant	Rhabditida
27	25	3203	12712	3.74339e-07	4.28575	1.48908e-05	GO@GO:0008380	GO	GO:0008380	RNA splicing	Rhabditida
4	0	3232	12744	0.00167913	Inf	0.0265377	GO@GO:0004176	GO	GO:0004176	ATP-dependent peptidase activity	Rhabditida
4	0	3232	12744	0.00167913	Inf	0.0265377	GO@GO:0008053	GO	GO:0008053	mitochondrial fusion	Rhabditida
4	0	3232	12744	0.00167913	Inf	0.0265377	GO@GO:0042407	GO	GO:0042407	cristae formation	Rhabditida
13	11	3225	12733	0.000245445	4.66546	0.00530858	phenotype@0000706	phenotype	706	gut granule biogenesis reduced	Rhabditida
18	6	3212	12733	1.17115e-08	11.8863	5.98118e-07	GO@GO:0004812	GO	GO:0004812	aminoacyl-tRNA ligase activity	Rhabditida
15	5	3217	12734	2.07591e-07	11.8688	8.85841e-06	GO@GO:0006418	GO	GO:0006418	tRNA aminoacylation for protein translation	Rhabditida
35	29	3190	12702	1.1279e-09	4.805	6.20031e-08	GO@GO:0016874	GO	GO:0016874	ligase activity	Rhabditida
20	9	3215	12732	1.89437e-08	8.79875	9.37241e-07	KEGG@cel00970	KEGG	cel00970	Aminoacyl-tRNA biosynthesis	Rhabditida
4	2	3233	12741	0.0177412	7.88043	0.176407	GO@GO:0008360	GO	GO:0008360	regulation of cell shape	Rhabditida
6	7	3232	12734	0.0318416	3.37711	0.267294	GO@GO:0043087	GO	GO:0043087	regulation of GTPase activity	Rhabditida
7	8	3230	12736	0.0192751	3.45004	0.18862	GO@GO:0090597	GO	GO:0090597	nematode male tail mating organ morphogenesis	Rhabditida
14	25	3221	12712	0.0170014	2.20998	0.176407	GO@GO:0031267	GO	GO:0031267	small GTPase binding	Rhabditida
10	10	3221	12734	0.00281466	3.95297	0.0409701	KEGG@cel00260	KEGG	cel00260	Glycine	Rhabditida
10	10	3221	12734	0.00281466	3.95297	0.0409701	KEGG@ serine and threonine metabolism	KEGG	serine and threonine metabolism	NA	Rhabditida
9	6	3229	12735	0.000863017	5.91501	0.0153866	KEGG@cel04330	KEGG	cel04330	Notch signaling pathway	Rhabditida
9	7	3228	12737	0.00161354	5.07245	0.0265377	GO@GO:0008654	GO	GO:0008654	phospholipid biosynthetic process	Rhabditida
16	10	3222	12734	5.10061e-06	6.32252	0.000165413	phenotype@0001885	phenotype	1885	cleavage furrow initiation defective early emb	Rhabditida
9	12	3224	12727	0.015512	2.9604	0.163506	GO@GO:0005777	GO	GO:0005777	peroxisome	Rhabditida
4	3	3230	12740	0.0347154	5.25828	0.269021	GO@GO:0008483	GO	GO:0008483	transaminase activity	Rhabditida
42	58	3196	12686	5.83281e-07	2.87409	2.25232e-05	phenotype@0001208	phenotype	1208	RNAi resistant	Rhabditida
24	33	3214	12711	0.000141004	2.87602	0.00327329	phenotype@0001595	phenotype	1595	somatic transgene silencing variant	Rhabditida
70	87	3168	12657	4.11877e-12	3.21405	2.93732e-10	phenotype@0000030	phenotype	30	growth variant	Rhabditida
15	7	3223	12737	1.52908e-06	8.4668	5.37965e-05	phenotype@0002428	phenotype	2428	intestinal degeneration	Rhabditida
4	2	3232	12741	0.0177254	7.88287	0.176407	GO@GO:0001731	GO	GO:0001731	formation of translation preinitiation complex	Rhabditida
4	3	3232	12740	0.0347742	5.25503	0.269021	KEGG@cel00760	KEGG	cel00760	Nicotinate and nicotinamide metabolism	Rhabditida
8	12	3223	12729	0.0341292	2.63266	0.269021	GO@GO:0009058	GO	GO:0009058	biosynthetic process	Rhabditida
14	16	3212	12723	0.000992063	3.46578	0.0174904	GO@GO:0030170	GO	GO:0030170	pyridoxal phosphate binding	Rhabditida
5	3	3230	12741	0.0109611	6.57323	0.122125	GO@GO:0046513	GO	GO:0046513	ceramide biosynthetic process	Rhabditida
6	7	3232	12736	0.0318233	3.37764	0.267294	GO@GO:0032154	GO	GO:0032154	cleavage furrow	Rhabditida
21	22	3214	12716	2.55291e-05	3.77618	0.000701695	GO@GO:0090305	GO	GO:0090305	nucleic acid phosphodiester bond hydrolysis	Rhabditida
8	4	3229	12740	0.000632981	7.88957	0.0116192	GO@GO:0043022	GO	GO:0043022	ribosome binding	Rhabditida
37	91	3201	12653	0.0120939	1.60714	0.132597	phenotype@0002066	phenotype	2066	basement membrane gap expansion variant	Rhabditida
3	0	3233	12744	0.00829801	Inf	0.0971885	GO@GO:0030131	GO	GO:0030131	clathrin adaptor complex	Rhabditida
51	50	3175	12683	1.0635e-11	4.07406	7.45017e-10	GO@GO:0006886	GO	GO:0006886	intracellular protein transport	Rhabditida
20	10	3217	12733	4.62774e-08	7.91464	2.16765e-06	GO@GO:0032543	GO	GO:0032543	mitochondrial translation	Rhabditida
10	9	3227	12733	0.00173852	4.38364	0.0269053	GO@GO:0007281	GO	GO:0007281	germ cell development	Rhabditida
6	1	3232	12743	0.000398713	23.6654	0.00783464	GO@GO:0016651	GO	GO:0016651	oxidoreductase activity, acting on NAD(P)H	Rhabditida
3	1	3235	12743	0.0281938	11.8112	0.241582	phenotype@0001606	phenotype	1606	ethanol hypersensitive	Rhabditida
4	1	3234	12743	0.0070501	15.7566	0.0894581	phenotype@0001611	phenotype	1611	halothane hypersensitive	Rhabditida
8	4	3230	12740	0.000634095	7.88713	0.0116192	phenotype@0002129	phenotype	2129	mitochondrial DNA copy number variant	Rhabditida
4	0	3234	12744	0.00168245	Inf	0.0265377	phenotype@0002142	phenotype	2142	mitochondrial respiratory chain variant	Rhabditida
22	11	3216	12733	9.72116e-09	7.91711	4.99693e-07	phenotype@0000056	phenotype	56	late larval arrest	Rhabditida
146	71	3092	12673	1.97037e-51	8.42661	1.19981e-48	phenotype@0000402	phenotype	402	avoids bacterial lawn	Rhabditida
18	17	3220	12727	4.01584e-05	4.18448	0.00108496	phenotype@0000019	phenotype	19	pharyngeal pumping reduced	Rhabditida
40	58	3198	12686	2.56438e-06	2.73541	8.71228e-05	phenotype@0001401	phenotype	1401	mitochondria morphology variant	Rhabditida
41	54	3197	12690	3.29368e-07	3.01344	1.32349e-05	phenotype@0000962	phenotype	962	level of transgene expression variant	Rhabditida
4	2	3234	12742	0.017753	7.87861	0.176407	phenotype@0002380	phenotype	2380	neuron degeneration enhanced	Rhabditida
4	2	3231	12740	0.0177136	7.88469	0.176407	GO@GO:0009116	GO	GO:0009116	nucleoside metabolic process	Rhabditida
10	4	3224	12740	5.08852e-05	9.87704	0.00133539	KEGG@cel00030	KEGG	cel00030	Pentose phosphate pathway	Rhabditida
5	2	3228	12740	0.00492337	9.8648	0.0669999	GO@GO:0032266	GO	GO:0032266	phosphatidylinositol-3-phosphate binding	Rhabditida
10	1	3226	12741	1.0311e-06	39.4869	3.66018e-05	GO@GO:0030163	GO	GO:0030163	protein catabolic process	Rhabditida
5	0	3232	12740	0.000340539	Inf	0.0068768	GO@GO:0045335	GO	GO:0045335	phagocytic vesicle	Rhabditida
5	1	3233	12742	0.00169917	19.701	0.0265377	GO@GO:0043277	GO	GO:0043277	apoptotic cell clearance	Rhabditida
37	52	3201	12692	3.59649e-06	2.82102	0.000120126	phenotype@0000057	phenotype	57	early larval lethal	Rhabditida
105	135	3133	12609	9.26242e-17	3.12978	1.01835e-14	phenotype@0000583	phenotype	583	dumpy	Rhabditida
14	10	3224	12734	4.71831e-05	5.52884	0.00125336	phenotype@0000760	phenotype	760	spindle orientation defective early emb	Rhabditida
50	31	3188	12713	4.24248e-16	6.43084	4.47779e-14	phenotype@0000644	phenotype	644	paralyzed	Rhabditida
51	47	3187	12697	2.628e-12	4.32253	1.90855e-10	phenotype@0000017	phenotype	17	aldicarb resistant	Rhabditida
32	37	3206	12707	9.21095e-07	3.42778	3.3489e-05	phenotype@0000848	phenotype	848	developmental delay	Rhabditida
7	5	3230	12738	0.00419609	5.5203	0.0588542	KEGG@cel00670	KEGG	cel00670	One carbon pool by folate	Rhabditida
18	19	3218	12723	0.000102448	3.7452	0.0024725	GO@GO:0008033	GO	GO:0008033	tRNA processing	Rhabditida
15	17	3218	12722	0.000632819	3.48809	0.0116192	GO@GO:0004518	GO	GO:0004518	nuclease activity	Rhabditida
9	6	3226	12737	0.000857298	5.92144	0.0153538	GO@GO:0004519	GO	GO:0004519	endonuclease activity	Rhabditida
12	17	3224	12725	0.00764605	2.786	0.0951668	GO@GO:0000149	GO	GO:0000149	SNARE binding	Rhabditida
7	5	3230	12737	0.00419765	5.51987	0.0588542	GO@GO:0006836	GO	GO:0006836	neurotransmitter transport	Rhabditida
10	16	3226	12725	0.0251278	2.46515	0.233464	GO@GO:0008021	GO	GO:0008021	synaptic vesicle	Rhabditida
4	2	3232	12742	0.0177213	7.88349	0.176407	GO@GO:0048278	GO	GO:0048278	vesicle docking	Rhabditida
8	10	3229	12732	0.0175004	3.15399	0.176407	KEGG@cel04130	KEGG	cel04130	SNARE interactions in vesicular transport	Rhabditida
9	10	3229	12734	0.00724079	3.54899	0.0914164	phenotype@0000304	phenotype	304	isoamyl alcohol chemotaxis defective	Rhabditida
19	23	3219	12721	0.000224003	3.26402	0.00489837	phenotype@0002369	phenotype	2369	sister cell division timing asynchrony reduced	Rhabditida
20	20	3207	12721	2.478e-05	3.96618	0.000683478	GO@GO:0016853	GO	GO:0016853	isomerase activity	Rhabditida
14	18	3219	12724	0.00217358	3.07403	0.0327111	GO@GO:0040025	GO	GO:0040025	vulval development	Rhabditida
16	17	3221	12724	0.000261168	3.71755	0.00549842	KEGG@cel00480	KEGG	cel00480	Glutathione metabolism	Rhabditida
7	4	3231	12739	0.00212099	6.89864	0.0320051	KEGG@cel00590	KEGG	cel00590	Arachidonic acid metabolism	Rhabditida
7	9	3229	12733	0.0283714	3.06668	0.242209	GO@GO:0016529	GO	GO:0016529	sarcoplasmic reticulum	Rhabditida
82	54	3156	12690	1.53703e-24	6.10487	2.82957e-22	phenotype@0000055	phenotype	55	early larval arrest	Rhabditida
9	3	3229	12741	6.87669e-05	11.8313	0.00172266	phenotype@0000116	phenotype	116	mid larval lethal	Rhabditida
68	97	3170	12647	5.73952e-10	2.79659	3.31636e-08	phenotype@0000164	phenotype	164	thin	Rhabditida
99	46	3139	12698	4.7225e-36	8.7044	1.55764e-33	phenotype@0002095	phenotype	2095	lysosome-related organelle morphology variant	Rhabditida
77	61	3161	12683	3.01591e-20	5.06405	4.04644e-18	phenotype@0001794	phenotype	1794	cytoplasmic processing body variant	Rhabditida
9	4	3228	12739	0.000182834	8.87773	0.00402235	KEGG@cel00062	KEGG	cel00062	Fatty acid elongation	Rhabditida
6	5	3232	12738	0.0124049	4.72883	0.133267	KEGG@cel01040	KEGG	cel01040	Biosynthesis of unsaturated fatty acids	Rhabditida
76	118	3162	12626	9.47445e-10	2.57167	5.24474e-08	phenotype@0000006	phenotype	6	egg laying defective	Rhabditida
16	23	3222	12721	0.00245087	2.74619	0.036675	phenotype@0000016	phenotype	16	aldicarb hypersensitive	Rhabditida
3	1	3235	12743	0.0281938	11.8112	0.241582	phenotype@0000020	phenotype	20	pharyngeal pumping irregular	Rhabditida
5	5	3233	12739	0.0344973	3.93985	0.269021	phenotype@0000106	phenotype	106	inhibition of oocyte maturation variant	Rhabditida
23	49	3215	12695	0.0130029	1.85334	0.138908	phenotype@0000315	phenotype	315	mechanosensation variant	Rhabditida
19	28	3219	12716	0.00123316	2.68035	0.0213138	phenotype@0000384	phenotype	384	axon guidance variant	Rhabditida
12	8	3226	12736	0.000114767	5.92098	0.00273993	phenotype@0000420	phenotype	420	levamisole hypersensitive	Rhabditida
4	2	3234	12742	0.017753	7.87861	0.176407	phenotype@0000656	phenotype	656	acetylcholine synaptic transmission variant	Rhabditida
11	11	3227	12733	0.00176302	3.94532	0.0270466	phenotype@0000680	phenotype	680	aldicarb response variant	Rhabditida
7	7	3231	12737	0.0124368	3.94167	0.133267	phenotype@0000845	phenotype	845	levamisole response variant	Rhabditida
10	9	3228	12735	0.00174021	4.38297	0.0269053	phenotype@0000847	phenotype	847	presynaptic component localization variant	Rhabditida
53	58	3185	12686	7.112e-11	3.63929	4.69155e-09	phenotype@0000867	phenotype	867	embryonic arrest	Rhabditida
3	0	3235	12744	0.00831029	Inf	0.0971885	phenotype@0001618	phenotype	1618	halothane resistant	Rhabditida
14	10	3224	12734	4.71831e-05	5.52884	0.00125336	phenotype@0000273	phenotype	273	thrashing reduced	Rhabditida
10	14	3228	12730	0.0137481	2.81663	0.146081	phenotype@0000631	phenotype	631	drug response variant	Rhabditida
5	5	3233	12739	0.0344973	3.93985	0.269021	phenotype@0000655	phenotype	655	GABA synaptic transmission variant	Rhabditida
52	113	3186	12631	0.000406552	1.82429	0.00795836	phenotype@0001182	phenotype	1182	fat content variant	Rhabditida
5	1	3233	12743	0.00169866	19.7025	0.0265377	phenotype@0001320	phenotype	1320	endogenous synaptic amplitude variant	Rhabditida
13	13	3225	12731	0.000679785	3.94714	0.0123139	phenotype@0001105	phenotype	1105	P0 spindle position abnormal	Rhabditida
4	3	3234	12741	0.0348256	5.25219	0.269021	phenotype@0001107	phenotype	1107	spindle rotation defective early emb	Rhabditida
4	3	3234	12741	0.0348256	5.25219	0.269021	phenotype@0001110	phenotype	1110	aster defective early emb	Rhabditida
22	7	3216	12737	1.8397e-10	12.4415	1.13774e-08	phenotype@0001743	phenotype	1743	mitosis variant	Rhabditida
4	0	3234	12744	0.00168245	Inf	0.0265377	phenotype@0001345	phenotype	1345	cytoskeleton organization biogenesis variant	Rhabditida
7	3	3231	12741	0.000934651	9.1994	0.0165519	phenotype@0001580	phenotype	1580	nuclear envelope breakdown variant	Rhabditida
23	34	3215	12710	0.000407167	2.67428	0.00795836	phenotype@0000425	phenotype	425	antibody staining reduced	Rhabditida
14	10	3224	12734	4.71831e-05	5.52884	0.00125336	phenotype@0001351	phenotype	1351	protein phosphorylation reduced	Rhabditida
7	6	3231	12738	0.00751986	4.59891	0.0941886	phenotype@0000765	phenotype	765	spindle elongation integrity defective early emb	Rhabditida
15	20	3215	12716	0.00195261	2.96611	0.0298395	GO@GO:0006631	GO	GO:0006631	fatty acid metabolic process	Rhabditida
26	26	3212	12718	1.62554e-06	3.95907	5.64377e-05	phenotype@0000275	phenotype	275	organism UV hypersensitive	Rhabditida
6	1	3230	12742	0.000397721	23.6782	0.00783464	GO@GO:0090326	GO	GO:0090326	positive regulation of locomotion involved in locomotory behavior	Rhabditida
11	7	3227	12737	0.000178077	6.20146	0.00394861	phenotype@0000926	phenotype	926	body wall muscle morphology variant	Rhabditida
33	54	3205	12690	0.000106687	2.41949	0.00256697	phenotype@0001426	phenotype	1426	coelomocyte endocytosis defective	Rhabditida
19	19	3219	12725	4.09474e-05	3.95263	0.00110252	phenotype@0000632	phenotype	632	axon fasciculation variant	Rhabditida
53	39	3161	12677	3.02429e-15	5.44929	2.99253e-13	GO@GO:0003735	GO	GO:0003735	structural constituent of ribosome	Rhabditida
62	43	3151	12672	2.41676e-18	5.79768	2.94324e-16	GO@GO:0005840	GO	GO:0005840	ribosome	Rhabditida
13	10	3214	12720	0.000135352	5.14427	0.00316996	GO@GO:0022625	GO	GO:0022625	cytosolic large ribosomal subunit	Rhabditida
14	5	3222	12738	7.83426e-07	11.07	2.90049e-05	GO@GO:0019843	GO	GO:0019843	rRNA binding	Rhabditida
54	48	3173	12687	2.1869e-13	4.49765	1.78469e-11	KEGG@cel03010	KEGG	cel03010	Ribosome	Rhabditida
45	30	3193	12714	5.57869e-14	5.97183	5.13499e-12	phenotype@0000270	phenotype	270	pleiotropic defects severe early emb	Rhabditida
7	8	3228	12735	0.0192309	3.4519	0.18862	GO@GO:0006633	GO	GO:0006633	fatty acid biosynthetic process	Rhabditida
50	42	3173	12687	4.33702e-13	4.75939	3.3992e-11	GO@GO:0005730	GO	GO:0005730	nucleolus	Rhabditida
23	19	3205	12719	7.87184e-07	4.80331	2.90049e-05	GO@GO:0006260	GO	GO:0006260	DNA replication	Rhabditida
3	1	3234	12742	0.0281792	11.814	0.241582	GO@GO:0003916	GO	GO:0003916	DNA topoisomerase activity	Rhabditida
30	28	3203	12714	9.59158e-08	4.25241	4.33868e-06	KEGG@cel00240	KEGG	cel00240	Pyrimidine metabolism	Rhabditida
18	6	3220	12738	1.20396e-08	11.8614	6.07042e-07	phenotype@0001282	phenotype	1282	mitochondrial metabolism variant	Rhabditida
7	1	3231	12743	9.17861e-05	27.61	0.00222877	phenotype@0001284	phenotype	1284	coenzyme Q depleted	Rhabditida
10	10	3228	12734	0.00285287	3.9444	0.0412857	phenotype@0001077	phenotype	1077	chromosome segregation variant karyomeres early emb	Rhabditida
39	22	3199	12722	1.40346e-13	7.0487	1.20759e-11	phenotype@0001567	phenotype	1567	nuclei enlarged	Rhabditida
86	46	3152	12698	3.45692e-29	7.53031	8.29242e-27	phenotype@0001950	phenotype	1950	diplotene region organization variant	Rhabditida
97	60	3141	12684	5.30615e-30	6.52736	1.35495e-27	phenotype@0001969	phenotype	1969	germ cell compartment morphology variant	Rhabditida
15	19	3223	12725	0.00139084	3.1166	0.0233756	phenotype@0000351	phenotype	351	failure to hatch	Rhabditida
74	54	3164	12690	9.51404e-21	5.4954	1.34488e-18	phenotype@0001010	phenotype	1010	clear	Rhabditida
6	1	3232	12743	0.000398713	23.6654	0.00783464	phenotype@0001399	phenotype	1399	cell membrane morphology variant	Rhabditida
14	5	3224	12739	7.87777e-07	11.064	2.90049e-05	phenotype@0001421	phenotype	1421	endocytic transport variant	Rhabditida
12	21	3226	12723	0.0236414	2.25353	0.221474	phenotype@0000649	phenotype	649	vulva location variant	Rhabditida
11	20	3227	12724	0.035523	2.16854	0.269021	phenotype@0004004	phenotype	4004	male response to contact defective	Rhabditida
18	26	3220	12718	0.00139829	2.73408	0.023451	phenotype@0000541	phenotype	541	cord commissures fail to reach target	Rhabditida
3	1	3235	12743	0.0281938	11.8112	0.241582	phenotype@0001873	phenotype	1873	meiotic spindle assembly defective	Rhabditida
16	20	3222	12724	0.000880585	3.15885	0.0156645	phenotype@0000882	phenotype	882	dendrite development variant	Rhabditida
8	10	3230	12734	0.0175129	3.15351	0.176407	phenotype@0001932	phenotype	1932	myopodia present	Rhabditida
32	49	3206	12695	5.39733e-05	2.58585	0.00140544	phenotype@0000645	phenotype	645	roller	Rhabditida
52	74	3186	12670	5.57154e-08	2.79426	2.5642e-06	phenotype@0000676	phenotype	676	growth rate variant	Rhabditida
50	64	3188	12680	9.15127e-09	3.10696	4.79745e-07	phenotype@0001645	phenotype	1645	protein degradation variant	Rhabditida
9	5	3229	12739	0.000420279	7.10012	0.00808705	phenotype@0002106	phenotype	2106	early endosome localization variant	Rhabditida
8	5	3230	12739	0.00135568	6.30933	0.0229016	phenotype@0002105	phenotype	2105	late endosome localization variant	Rhabditida
8	4	3230	12740	0.000634095	7.88713	0.0116192	phenotype@0001315	phenotype	1315	electrophysiology phenotype	Rhabditida
99	110	3139	12634	8.75133e-19	3.62198	1.08243e-16	phenotype@0000436	phenotype	436	protein subcellular localization variant	Rhabditida
14	19	3224	12725	0.00311378	2.90802	0.0449794	phenotype@0000633	phenotype	633	axon branching variant	Rhabditida
14	26	3222	12713	0.0214202	2.12452	0.202559	KEGG@cel03018	KEGG	cel03018	RNA degradation	Rhabditida
3	0	3235	12744	0.00831029	Inf	0.0971885	GO@GO:0008046	GO	GO:0008046	axon guidance receptor activity	Rhabditida
9	8	3227	12730	0.0028183	4.43738	0.0409701	GO@GO:0030433	GO	GO:0030433	ubiquitin-dependent ERAD pathway	Rhabditida
22	35	3212	12694	0.00109768	2.48397	0.0190137	GO@GO:0005654	GO	GO:0005654	nucleoplasm	Rhabditida
57	53	3172	12683	1.61859e-13	4.29966	1.37771e-11	KEGG@cel04141	KEGG	cel04141	Protein processing in endoplasmic reticulum	Rhabditida
6	6	3232	12738	0.0206014	3.94076	0.196009	phenotype@0001724	phenotype	1724	tunicamycin hypersensitive	Rhabditida
11	9	3227	12735	0.00062755	4.82272	0.0116192	phenotype@0001083	phenotype	1083	multiple cytoplasmic cavities early emb	Rhabditida
32	37	3206	12707	9.21095e-07	3.42778	3.3489e-05	phenotype@0001143	phenotype	1143	multiple nuclei early emb	Rhabditida
36	45	3202	12699	7.15034e-07	3.17231	2.69681e-05	phenotype@0000775	phenotype	775	meiosis variant	Rhabditida
4	3	3234	12741	0.0348256	5.25219	0.269021	phenotype@0001343	phenotype	1343	meiotic spindle defective early emb	Rhabditida
19	15	3219	12729	4.98347e-06	5.00813	0.000162342	phenotype@0000119	phenotype	119	protein expression increased	Rhabditida
7	4	3231	12740	0.00212017	6.89918	0.0320051	phenotype@0001880	phenotype	1880	endoplasmic reticulum morphology variant	Rhabditida
3	0	3235	12744	0.00831029	Inf	0.0971885	phenotype@0001919	phenotype	1919	gut granules enlarged	Rhabditida
5	5	3233	12739	0.0344973	3.93985	0.269021	phenotype@0000359	phenotype	359	tunicamycin response variant	Rhabditida
15	5	3223	12739	2.10978e-07	11.8514	8.85841e-06	phenotype@0000063	phenotype	63	terminal arrest variable	Rhabditida
16	28	3222	12716	0.00973973	2.25508	0.112319	phenotype@0000124	phenotype	124	enzyme activity reduced	Rhabditida
31	34	3207	12710	6.32895e-07	3.61312	2.42029e-05	phenotype@0001538	phenotype	1538	mRNA surveillance defective	Rhabditida
5	5	3231	12736	0.0344551	3.94136	0.269021	GO@GO:0009306	GO	GO:0009306	protein secretion	Rhabditida
8	6	3230	12738	0.00260287	5.25746	0.0386989	phenotype@0000545	phenotype	545	egg retention	Rhabditida
3	1	3235	12743	0.0281938	11.8112	0.241582	phenotype@0001319	phenotype	1319	endogenous synaptic event frequency reduced	Rhabditida
8	11	3230	12733	0.0249835	2.86673	0.232397	phenotype@0001331	phenotype	1331	motor neuron morphology variant	Rhabditida
30	44	3199	12694	4.985e-05	2.70528	0.00131977	GO@GO:0004386	GO	GO:0004386	helicase activity	Rhabditida
37	44	3194	12682	2.11501e-07	3.33888	8.85841e-06	GO@GO:0006281	GO	GO:0006281	DNA repair	Rhabditida
6	4	3228	12740	0.00675871	5.91917	0.0894581	GO@GO:0030117	GO	GO:0030117	membrane coat	Rhabditida
16	22	3217	12716	0.00175848	2.87447	0.0270466	GO@GO:0006888	GO	GO:0006888	endoplasmic reticulum to Golgi vesicle-mediated transport	Rhabditida
4	0	3232	12744	0.00167913	Inf	0.0265377	KEGG@cel00512	KEGG	cel00512	Mucin type O-Glycan biosynthesis	Rhabditida
9	8	3227	12735	0.0028119	4.43913	0.0409701	GO@GO:0042147	GO	GO:0042147	retrograde transport, endosome to Golgi	Rhabditida
12	19	3222	12720	0.0139159	2.49321	0.147535	GO@GO:0030176	GO	GO:0030176	integral component of endoplasmic reticulum membrane	Rhabditida
5	2	3232	12741	0.00494433	9.85337	0.0669999	GO@GO:0061025	GO	GO:0061025	membrane fusion	Rhabditida
5	5	3230	12738	0.0344037	3.9432	0.269021	GO@GO:0006915	GO	GO:0006915	apoptotic process	Rhabditida
20	27	3218	12717	0.000420102	2.92701	0.00808705	phenotype@0001428	phenotype	1428	intestinal vacuole	Rhabditida
11	10	3227	12734	0.00107758	4.34015	0.0187888	phenotype@0001748	phenotype	1748	pharynx unattached	Rhabditida
25	29	3208	12709	1.43976e-05	3.41513	0.00042686	KEGG@cel03015	KEGG	cel03015	mRNA surveillance pathway	Rhabditida
21	36	3217	12708	0.00276727	2.30418	0.0407928	phenotype@0000052	phenotype	52	maternal effect lethal emb	Rhabditida
11	19	3227	12725	0.027882	2.28282	0.241582	phenotype@0000698	phenotype	698	vulvaless	Rhabditida
57	72	3181	12672	6.07157e-10	3.15328	3.45774e-08	phenotype@0000700	phenotype	700	multivulva	Rhabditida
6	6	3232	12738	0.0206014	3.94076	0.196009	phenotype@0001272	phenotype	1272	vulval cell induction variant	Rhabditida
8	9	3230	12735	0.0117895	3.50444	0.129619	phenotype@0000628	phenotype	628	spindle assembly defective early emb	Rhabditida
11	14	3227	12730	0.00611598	3.09914	0.0819189	phenotype@0000746	phenotype	746	cell division variant	Rhabditida
5	4	3233	12740	0.0206453	4.92509	0.196009	phenotype@0000318	phenotype	318	cell cycle delayed	Rhabditida
9	5	3229	12739	0.000420279	7.10012	0.00808705	phenotype@0001903	phenotype	1903	centrosome biogenesis variant	Rhabditida
21	14	3217	12730	3.07464e-07	5.93475	1.24814e-05	phenotype@0001400	phenotype	1400	level of protein expression variant	Rhabditida
16	16	3222	12728	0.000165634	3.94989	0.00370384	phenotype@0002118	phenotype	2118	population fitness phenotype	Rhabditida
11	4	3227	12740	1.40424e-05	10.8567	0.000417894	phenotype@0000196	phenotype	196	distal tip cell morphology variant	Rhabditida
10	5	3228	12733	0.00012637	7.88768	0.00296839	GO@GO:0006606	GO	GO:0006606	protein import into nucleus	Rhabditida
10	3	3225	12741	1.78256e-05	13.1637	0.000509414	KEGG@cel01210	KEGG	cel01210	2-Oxocarboxylic acid metabolism	Rhabditida
4	2	3233	12737	0.0177572	7.87795	0.176407	GO@GO:0031175	GO	GO:0031175	neuron projection development	Rhabditida
4	1	3233	12743	0.00704348	15.7615	0.0894581	GO@GO:0097402	GO	GO:0097402	neuroblast migration	Rhabditida
9	8	3229	12736	0.00282071	4.43673	0.0409701	phenotype@0000002	phenotype	2	kinker	Rhabditida
22	17	3216	12727	7.15425e-07	5.12063	2.69681e-05	phenotype@0000104	phenotype	104	cell polarity variant	Rhabditida
6	8	3232	12736	0.0463472	2.95516	0.299259	phenotype@0000181	phenotype	181	axon trajectory variant	Rhabditida
35	67	3203	12677	0.000630905	2.06748	0.0116192	phenotype@0000469	phenotype	469	Q neuroblast lineage migration variant	Rhabditida
14	9	3224	12735	2.41694e-05	6.14358	0.000668969	phenotype@0000470	phenotype	470	HSN migration variant	Rhabditida
25	26	3213	12718	4.07743e-06	3.80563	0.000133929	phenotype@0000695	phenotype	695	vulva morphology variant	Rhabditida
9	7	3229	12737	0.00161651	5.07088	0.0265377	phenotype@0001404	phenotype	1404	ectopic expression antibody	Rhabditida
3	1	3235	12743	0.0281938	11.8112	0.241582	phenotype@0002491	phenotype	2491	ectopic neurite outgrowth	Rhabditida
8	11	3230	12733	0.0249835	2.86673	0.232397	phenotype@0000220	phenotype	220	vulva cell fate specification variant	Rhabditida
17	22	3221	12722	0.000803757	3.0517	0.0144275	phenotype@0000594	phenotype	594	cell migration variant	Rhabditida
11	20	3227	12724	0.035523	2.16854	0.269021	phenotype@0000976	phenotype	976	ventral cord patterning variant	Rhabditida
20	19	3218	12725	1.58986e-05	4.16194	0.000466122	phenotype@0001761	phenotype	1761	axon midline crossing variant	Rhabditida
31	51	3197	12682	0.000176873	2.41106	0.00394402	GO@GO:0008168	GO	GO:0008168	methyltransferase activity	Rhabditida
26	46	3205	12689	0.00127752	2.23765	0.0220323	GO@GO:0032259	GO	GO:0032259	methylation	Rhabditida
11	12	3221	12730	0.00273448	3.62245	0.04046	GO@GO:0000049	GO	GO:0000049	tRNA binding	Rhabditida
3	0	3235	12743	0.00831185	Inf	0.0971885	GO@GO:0009019	GO	GO:0009019	tRNA (guanine-N1-)-methyltransferase activity	Rhabditida
12	12	3225	12731	0.00109132	3.94714	0.018945	GO@GO:0030488	GO	GO:0030488	tRNA methylation	Rhabditida
27	27	3199	12713	9.71983e-07	3.97359	3.51334e-05	GO@GO:0006364	GO	GO:0006364	rRNA processing	Rhabditida
15	5	3222	12739	2.10259e-07	11.855	8.85841e-06	KEGG@cel00640	KEGG	cel00640	Propanoate metabolism	Rhabditida
12	13	3219	12725	0.00169654	3.64861	0.0265377	GO@GO:0006396	GO	GO:0006396	RNA processing	Rhabditida
7	4	3231	12737	0.00212262	6.89756	0.0320051	GO@GO:0071004	GO	GO:0071004	U2-type prespliceosome	Rhabditida
6	5	3231	12734	0.0124052	4.72881	0.133267	GO@GO:0005685	GO	GO:0005685	U1 snRNP	Rhabditida
28	16	3210	12728	4.65105e-10	6.93777	2.70719e-08	phenotype@0001925	phenotype	1925	oocytes disorganized	Rhabditida
14	30	3224	12714	0.0478138	1.84022	0.30822	phenotype@0000072	phenotype	72	body morphology variant	Rhabditida
3	1	3235	12743	0.0281938	11.8112	0.241582	phenotype@0001323	phenotype	1323	vesicle morphology variant	Rhabditida
15	28	3223	12716	0.0181835	2.11353	0.180377	phenotype@0001395	phenotype	1395	body vacuole	Rhabditida
10	0	3228	12744	1.15249e-07	Inf	5.09673e-06	phenotype@0000768	phenotype	768	cytoplasmic structure defective early emb	Rhabditida
16	9	3222	12735	2.41747e-06	7.0255	8.24859e-05	phenotype@0001751	phenotype	1751	organism hypertonic lethality increased	Rhabditida
13	6	3225	12738	7.44949e-06	8.55623	0.000233263	phenotype@0001422	phenotype	1422	endocytic transport defect	Rhabditida
21	32	3217	12712	0.000950531	2.59309	0.0167955	phenotype@0002176	phenotype	2176	seam cell morphology variant	Rhabditida
4	2	3234	12741	0.017757	7.87799	0.176407	GO@GO:0031491	GO	GO:0031491	nucleosome binding	Rhabditida
19	33	3212	12696	0.00474855	2.27565	0.065487	GO@GO:0006974	GO	GO:0006974	cellular response to DNA damage stimulus	Rhabditida
21	14	3217	12730	3.07464e-07	5.93475	1.24814e-05	phenotype@0001082	phenotype	1082	large cytoplasmic granules early emb	Rhabditida
29	28	3209	12716	2.5506e-07	4.10364	1.05219e-05	phenotype@0000779	phenotype	779	late embryonic arrest	Rhabditida
52	51	3186	12693	7.38993e-12	4.06163	5.2231e-10	phenotype@0000186	phenotype	186	oogenesis variant	Rhabditida
11	17	3227	12727	0.0162515	2.55175	0.170168	phenotype@0000037	phenotype	37	egg morphology variant	Rhabditida
11	15	3227	12729	0.0086892	2.8924	0.101301	phenotype@0000361	phenotype	361	lima bean arrest	Rhabditida
9	13	3229	12731	0.0217545	2.72927	0.204524	phenotype@0000366	phenotype	366	three fold arrest	Rhabditida
12	17	3226	12727	0.00766924	2.78472	0.0953057	phenotype@0000367	phenotype	367	comma arrest emb	Rhabditida
9	13	3229	12731	0.0217545	2.72927	0.204524	phenotype@0000368	phenotype	368	one point five fold arrest emb	Rhabditida
10	14	3228	12730	0.0137481	2.81663	0.146081	phenotype@0000494	phenotype	494	two fold arrest	Rhabditida
92	65	3146	12679	4.53642e-26	5.70343	8.97757e-24	phenotype@0001028	phenotype	1028	nuclear appearance variant	Rhabditida
15	19	3223	12725	0.00139084	3.1166	0.0233756	phenotype@0001908	phenotype	1908	ventral closure defective	Rhabditida
8	13	3230	12731	0.0459968	2.42536	0.299259	phenotype@0002570	phenotype	2570	embryonic arrest during gastrulation	Rhabditida
8	13	3230	12731	0.0459968	2.42536	0.299259	phenotype@0002571	phenotype	2571	anterior enclosure defective	Rhabditida
8	13	3230	12731	0.0459968	2.42536	0.299259	phenotype@0001907	phenotype	1907	dorsal intercalation defective	Rhabditida
8	13	3230	12731	0.0459968	2.42536	0.299259	phenotype@0002569	phenotype	2569	hypodermis development variant	Rhabditida
12	14	3225	12727	0.00260568	3.38256	0.0386989	GO@GO:0004197	GO	GO:0004197	cysteine-type endopeptidase activity	Rhabditida
43	42	3195	12702	4.37102e-10	4.06976	2.59472e-08	phenotype@0000172	phenotype	172	cell proliferation increased	Rhabditida
42	31	3196	12713	2.78006e-12	5.38848	2.00063e-10	phenotype@0001636	phenotype	1636	excess intestinal cells	Rhabditida
30	33	3208	12711	9.97013e-07	3.60169	3.58743e-05	phenotype@0001038	phenotype	1038	tumorous germline	Rhabditida
12	12	3222	12729	0.00108509	3.9502	0.0188782	GO@GO:0071013	GO	GO:0071013	catalytic step 2 spliceosome	Rhabditida
13	14	3220	12728	0.00105783	3.67005	0.0185261	GO@GO:0003724	GO	GO:0003724	RNA helicase activity	Rhabditida
14	10	3224	12734	4.71831e-05	5.52884	0.00125336	phenotype@0000710	phenotype	710	intestinal morphology variant	Rhabditida
4	3	3234	12741	0.0348256	5.25219	0.269021	phenotype@0002099	phenotype	2099	lysosome-related organelle localization variant	Rhabditida
13	15	3222	12722	0.00162432	3.42193	0.0265377	GO@GO:0016798	GO	GO:0016798	hydrolase activity, acting on glycosyl bonds	Rhabditida
8	10	3229	12729	0.0175197	3.15325	0.176407	GO@GO:0004553	GO	GO:0004553	hydrolase activity, hydrolyzing O-glycosyl compounds	Rhabditida
7	9	3230	12734	0.0283982	3.06597	0.242209	KEGG@cel00511	KEGG	cel00511	Other glycan degradation	Rhabditida
4	3	3232	12740	0.0347742	5.25503	0.269021	GO@GO:0008408	GO	GO:0008408	3'-5' exonuclease activity	Rhabditida
7	8	3228	12735	0.0192309	3.4519	0.18862	GO@GO:0006139	GO	GO:0006139	nucleobase-containing compound metabolic process	Rhabditida
11	8	3224	12731	0.000344163	5.42884	0.0069323	GO@GO:0031902	GO	GO:0031902	late endosome membrane	Rhabditida
23	36	3215	12708	0.000726261	2.52517	0.0131258	phenotype@0000717	phenotype	717	gene expression variant	Rhabditida
5	5	3230	12738	0.0344037	3.9432	0.269021	GO@GO:0019752	GO	GO:0019752	carboxylic acid metabolic process	Rhabditida
14	12	3222	12730	0.000153222	4.60886	0.00349984	KEGG@cel00270	KEGG	cel00270	Cysteine and methionine metabolism	Rhabditida
3	1	3235	12743	0.0281938	11.8112	0.241582	GO@GO:0035999	GO	GO:0035999	tetrahydrofolate interconversion	Rhabditida
3	1	3234	12743	0.0281742	11.8149	0.241582	GO@GO:0097475	GO	GO:0097475	motor neuron migration	Rhabditida
4	3	3233	12738	0.0348186	5.25258	0.269021	GO@GO:0008219	GO	GO:0008219	cell death	Rhabditida
3	1	3234	12742	0.0281792	11.814	0.241582	GO@GO:0033180	GO	GO:0033180	proton-transporting V-type ATPase, V1 domain	Rhabditida
11	8	3227	12736	0.00034552	5.42593	0.00694196	phenotype@0000421	phenotype	421	levamisole resistant	Rhabditida
45	31	3193	12713	1.10021e-13	5.77876	9.67699e-12	phenotype@0000365	phenotype	365	embryo osmotic integrity defective early emb	Rhabditida
14	4	3224	12740	2.55206e-07	13.8256	1.05219e-05	phenotype@0000405	phenotype	405	giant oocytes	Rhabditida
80	61	3158	12683	1.32015e-21	5.26633	2.04907e-19	phenotype@0001952	phenotype	1952	germline nuclear positioning variant	Rhabditida
10	6	3228	12738	0.000274755	6.57575	0.00575386	phenotype@0002122	phenotype	2122	persistence of paternal mitochondria	Rhabditida
6	6	3229	12737	0.0205349	3.94411	0.196009	GO@GO:0030145	GO	GO:0030145	manganese ion binding	Rhabditida
14	12	3224	12732	0.000153859	4.60672	0.00349984	phenotype@0001700	phenotype	1700	swimming variant	Rhabditida
33	22	3199	12719	1.23693e-10	5.96298	8.02586e-09	KEGG@cel03008	KEGG	cel03008	Ribosome biogenesis in eukaryotes	Rhabditida
37	26	3201	12718	2.37483e-11	5.65323	1.60677e-09	phenotype@0000042	phenotype	42	slow embryonic development	Rhabditida
28	23	3210	12721	4.88488e-08	4.82379	2.27463e-06	phenotype@0000690	phenotype	690	gonad migration variant	Rhabditida
13	7	3225	12737	1.73218e-05	7.33344	0.000496809	phenotype@0001949	phenotype	1949	diakinesis region organization variant	Rhabditida
32	15	3206	12729	1.67879e-12	8.46854	1.24199e-10	phenotype@0002390	phenotype	2390	variable cell division timing	Rhabditida
4	1	3233	12742	0.00704516	15.7602	0.0894581	GO@GO:0072583	GO	GO:0072583	clathrin-dependent endocytosis	Rhabditida
12	16	3224	12721	0.00549061	2.959	0.0737016	GO@GO:0030659	GO	GO:0030659	cytoplasmic vesicle membrane	Rhabditida
31	42	3207	12702	1.29769e-05	2.92311	0.000389111	phenotype@0000081	phenotype	81	L1 arrest	Rhabditida
29	14	3209	12730	2.69653e-11	8.21578	1.80896e-09	phenotype@0001955	phenotype	1955	multiple nuclei oocyte	Rhabditida
60	44	3178	12700	5.02124e-17	5.4486	5.84532e-15	phenotype@0001972	phenotype	1972	germ cell compartment multinucleate	Rhabditida
11	7	3227	12737	0.000178077	6.20146	0.00394861	phenotype@0001975	phenotype	1975	germ cell compartment large	Rhabditida
36	51	3202	12693	5.51098e-06	2.79795	0.000177337	phenotype@0001273	phenotype	1273	organism heat response variant	Rhabditida
8	10	3230	12734	0.0175129	3.15351	0.176407	phenotype@0001133	phenotype	1133	division axis defective	Rhabditida
22	23	3216	12721	1.61917e-05	3.78313	0.000472965	phenotype@0001225	phenotype	1225	phasmid socket absent	Rhabditida
26	54	3212	12690	0.00675339	1.90207	0.0894581	phenotype@0001276	phenotype	1276	ectopic expression transgene	Rhabditida
17	19	3221	12725	0.000252312	3.53451	0.00542745	phenotype@0000354	phenotype	354	cell differentiation variant	Rhabditida
8	8	3230	12736	0.00756889	3.94258	0.0945037	phenotype@0001235	phenotype	1235	cell division polarity variant	Rhabditida
22	45	3216	12699	0.0106376	1.93028	0.121863	phenotype@0001014	phenotype	1014	pathogen resistance increased	Rhabditida
16	13	3222	12731	3.48717e-05	4.86245	0.000951876	phenotype@0001181	phenotype	1181	accumulated somatic cell corpses	Rhabditida
4	3	3234	12741	0.0348256	5.25219	0.269021	phenotype@0000472	phenotype	472	endoderm absent	Rhabditida
9	11	3229	12733	0.0108309	3.22586	0.122125	phenotype@0001887	phenotype	1887	excess seam cells	Rhabditida
8	6	3230	12738	0.00260287	5.25746	0.0386989	phenotype@0000550	phenotype	550	body muscle dystrophy	Rhabditida
4	2	3234	12742	0.017753	7.87861	0.176407	phenotype@0000578	phenotype	578	body axis development variant	Rhabditida
18	12	3220	12732	2.18475e-06	5.93015	7.48679e-05	phenotype@0001644	phenotype	1644	protein metabolism variant	Rhabditida
5	5	3232	12738	0.0344719	3.94076	0.269021	GO@GO:0006829	GO	GO:0006829	zinc ion transport	Rhabditida
5	5	3230	12736	0.034421	3.94258	0.269021	GO@GO:0007029	GO	GO:0007029	endoplasmic reticulum organization	Rhabditida
11	17	3227	12727	0.0162515	2.55175	0.170168	phenotype@0000708	phenotype	708	intestinal development variant	Rhabditida
10	8	3228	12736	0.00100616	4.93117	0.0176995	phenotype@0000703	phenotype	703	epithelial morphology variant	Rhabditida
7	8	3231	12736	0.0193005	3.44897	0.18862	phenotype@0001136	phenotype	1136	embryonic morphology variant	Rhabditida
6	2	3232	12742	0.0013195	11.8212	0.0226575	phenotype@0001478	phenotype	1478	body elongation variant	Rhabditida
14	12	3224	12732	0.000153859	4.60672	0.00349984	phenotype@0000668	phenotype	668	endomitotic oocytes	Rhabditida
15	6	3223	12738	5.99317e-07	9.87856	2.30301e-05	phenotype@0001566	phenotype	1566	ventral enclosure variant	Rhabditida
3	1	3235	12743	0.0281938	11.8112	0.241582	GO@GO:0008203	GO	GO:0008203	cholesterol metabolic process	Rhabditida
27	13	3211	12731	1.27708e-10	8.23309	8.219e-09	phenotype@0000258	phenotype	258	cell secretion variant	Rhabditida
12	4	3225	12739	3.75115e-06	11.844	0.000124243	KEGG@cel00650	KEGG	cel00650	Butanoate metabolism	Rhabditida
5	1	3233	12743	0.00169866	19.7025	0.0265377	phenotype@0000027	phenotype	27	organism metabolism processing variant	Rhabditida
3	1	3235	12743	0.0281938	11.8112	0.241582	GO@GO:0005548	GO	GO:0005548	phospholipid transporter activity	Rhabditida
4	3	3234	12740	0.0348331	5.25178	0.269021	GO@GO:0120009	GO	GO:0120009	intermembrane lipid transfer	Rhabditida
6	1	3232	12742	0.000398858	23.6635	0.00783464	GO@GO:0061608	GO	GO:0061608	nuclear import signal receptor activity	Rhabditida
28	13	3210	12731	3.74981e-11	8.54065	2.49441e-09	phenotype@0001020	phenotype	1020	embryonic lethal late emb	Rhabditida
56	28	3182	12716	3.42139e-20	7.99101	4.51396e-18	phenotype@0001945	phenotype	1945	oocytes small	Rhabditida
22	7	3211	12737	1.794e-10	12.4608	1.12709e-08	KEGG@cel00020	KEGG	cel00020	Citrate cycle (TCA cycle)	Rhabditida
49	57	3189	12687	1.48341e-09	3.41986	8.04291e-08	phenotype@0000183	phenotype	183	apoptosis increased	Rhabditida
17	9	3221	12735	7.40514e-07	7.46687	2.76505e-05	phenotype@0000729	phenotype	729	cell death variant	Rhabditida
19	30	3219	12714	0.00220099	2.50128	0.0330608	phenotype@0001779	phenotype	1779	miRNA expression variant	Rhabditida
6	8	3232	12736	0.0463472	2.95516	0.299259	phenotype@0001228	phenotype	1228	alae absent	Rhabditida
21	17	3217	12727	2.02016e-06	4.88637	6.98322e-05	phenotype@0001130	phenotype	1130	cytokinesis fails early emb	Rhabditida
23	8	3215	12736	1.50847e-10	11.3902	9.62987e-09	phenotype@0001947	phenotype	1947	diplotene progression during oogenesis variant	Rhabditida
31	16	3207	12728	1.34979e-11	7.68822	9.37277e-10	phenotype@0001948	phenotype	1948	diakinesis progression during oogenesis variant	Rhabditida
5	4	3233	12740	0.0206453	4.92509	0.196009	phenotype@0001391	phenotype	1391	gamma ray induced apoptosis increased	Rhabditida
4	1	3234	12743	0.0070501	15.7566	0.0894581	KEGG@cel00430	KEGG	cel00430	Taurine and hypotaurine metabolism	Rhabditida
4	2	3233	12742	0.0177372	7.88105	0.176407	GO@GO:0006730	GO	GO:0006730	one-carbon metabolic process	Rhabditida
4	0	3233	12744	0.00168079	Inf	0.0265377	GO@GO:1904811	GO	GO:1904811	positive regulation of dense core granule transport	Rhabditida
8	5	3228	12737	0.00135223	6.31225	0.0229016	GO@GO:0005778	GO	GO:0005778	peroxisomal membrane	Rhabditida
11	11	3227	12733	0.00176302	3.94532	0.0270466	phenotype@0000073	phenotype	73	tail morphology variant	Rhabditida
10	9	3228	12735	0.00174021	4.38297	0.0269053	phenotype@0000704	phenotype	704	excretory canal morphology variant	Rhabditida
17	22	3221	12722	0.000803757	3.0517	0.0144275	phenotype@0000699	phenotype	699	vulva development variant	Rhabditida
10	9	3228	12735	0.00174021	4.38297	0.0269053	phenotype@0000117	phenotype	117	L1 lethal	Rhabditida
9	3	3229	12741	6.87669e-05	11.8313	0.00172266	phenotype@0000724	phenotype	724	protein secretion variant	Rhabditida
18	23	3220	12721	0.000511647	3.09142	0.00968947	phenotype@0000696	phenotype	696	everted vulva	Rhabditida
4	1	3233	12743	0.00704348	15.7615	0.0894581	GO@GO:0006559	GO	GO:0006559	L-phenylalanine catabolic process	Rhabditida
4	1	3234	12743	0.0070501	15.7566	0.0894581	KEGG@cel00400	KEGG	cel00400	Phenylalanine	Rhabditida
4	1	3234	12743	0.0070501	15.7566	0.0894581	KEGG@ tyrosine and tryptophan biosynthesis	KEGG	tyrosine and tryptophan biosynthesis	NA	Rhabditida
3	1	3235	12743	0.0281938	11.8112	0.241582	phenotype@0000911	phenotype	911	coelomocyte morphology variant	Rhabditida
8	7	3230	12737	0.0045927	4.5061	0.0636108	phenotype@0001833	phenotype	1833	membrane trafficking variant	Rhabditida
4	1	3233	12743	0.00704348	15.7615	0.0894581	GO@GO:0009083	GO	GO:0009083	branched-chain amino acid catabolic process	Rhabditida
6	6	3232	12737	0.0206076	3.94045	0.196009	GO@GO:0012507	GO	GO:0012507	ER to Golgi transport vesicle membrane	Rhabditida
4	1	3234	12742	0.00705178	15.7554	0.0894581	GO@GO:0030127	GO	GO:0030127	COPII vesicle coat	Rhabditida
4	3	3234	12739	0.0348406	5.25137	0.269021	GO@GO:0070971	GO	GO:0070971	endoplasmic reticulum exit site	Rhabditida
26	35	3212	12709	5.87976e-05	2.939	0.00152105	phenotype@0001569	phenotype	1569	body wall muscle myosin organization defective	Rhabditida
21	29	3217	12715	0.000377121	2.86186	0.0075577	phenotype@0001080	phenotype	1080	excessive blebbing early emb	Rhabditida
18	23	3220	12721	0.000511647	3.09142	0.00968947	phenotype@0001119	phenotype	1119	cell cycle slow early emb	Rhabditida
13	7	3225	12737	1.73218e-05	7.33344	0.000496809	phenotype@0001121	phenotype	1121	exaggerated asynchrony early emb	Rhabditida
12	11	3226	12733	0.000669319	4.30528	0.0121521	phenotype@0001126	phenotype	1126	cell cell contacts abnormal in four cell embryo	Rhabditida
21	6	3217	12738	2.14905e-10	13.8535	1.31875e-08	phenotype@0001139	phenotype	1139	nuclear envelope assembly variant early emb	Rhabditida
10	15	3228	12729	0.0188362	2.62856	0.186152	phenotype@0001165	phenotype	1165	excess maternal pronucleus early emb	Rhabditida
3	0	3235	12744	0.00831029	Inf	0.0971885	phenotype@0001186	phenotype	1186	embryo delayed at pronuclear contact early emb	Rhabditida
3	1	3235	12743	0.0281938	11.8112	0.241582	phenotype@0000177	phenotype	177	acetylcholinesterase reduced	Rhabditida
3	0	3235	12744	0.00831029	Inf	0.0971885	phenotype@0001289	phenotype	1289	acetylcholinesterase inhibitor resistant	Rhabditida
3	1	3235	12743	0.0281938	11.8112	0.241582	phenotype@0001987	phenotype	1987	acetylcholinesterase activity variant	Rhabditida
26	28	3212	12716	4.01727e-06	3.67573	0.000132503	phenotype@0002057	phenotype	2057	Bacillus thuringiensis toxin hypersensitive	Rhabditida
33	32	3205	12712	4.1142e-08	4.08976	1.93857e-06	phenotype@0002059	phenotype	2059	pore forming toxin hypersensitive	Rhabditida
5	3	3233	12741	0.0109969	6.56713	0.122125	GO@GO:0005324	GO	GO:0005324	long-chain fatty acid transporter activity	Rhabditida
18	23	3220	12721	0.000511647	3.09142	0.00968947	phenotype@0000138	phenotype	138	lipid composition variant	Rhabditida
6	3	3232	12741	0.00327811	7.88287	0.0468031	phenotype@0001211	phenotype	1211	cuticle integrity variant	Rhabditida
31	28	3207	12716	3.74109e-08	4.38936	1.784e-06	phenotype@0000467	phenotype	467	age associated fluorescence increased	Rhabditida
19	20	3219	12724	6.47438e-05	3.75473	0.00163742	phenotype@0001213	phenotype	1213	locomotion reduced	Rhabditida
10	13	3228	12731	0.00976168	3.03346	0.112319	phenotype@0001739	phenotype	1739	aging variant	Rhabditida
6	5	3232	12739	0.0124011	4.7292	0.133267	phenotype@0001452	phenotype	1452	octanol chemotaxis variant	Rhabditida
6	2	3232	12742	0.0013195	11.8212	0.0226575	GO@GO:0030897	GO	GO:0030897	HOPS complex	Rhabditida
8	2	3230	12740	8.54976e-05	15.7724	0.00210841	GO@GO:0006904	GO	GO:0006904	vesicle docking involved in exocytosis	Rhabditida
9	15	3229	12729	0.0388939	2.3651	0.269021	phenotype@0001106	phenotype	1106	spindle orientation variant AB or P1 early emb	Rhabditida
5	4	3233	12740	0.0206453	4.92509	0.196009	phenotype@0001127	phenotype	1127	EMS anterior extension fails early emb	Rhabditida
9	13	3229	12731	0.0217545	2.72927	0.204524	phenotype@0001155	phenotype	1155	pronuclei meet centrally early emb	Rhabditida
10	14	3228	12730	0.0137481	2.81663	0.146081	phenotype@0001156	phenotype	1156	pronuclear size defective early emb	Rhabditida
14	6	3224	12738	2.13364e-06	9.2172	7.34344e-05	phenotype@0001177	phenotype	1177	embryo osmotic pressure sensitive early emb	Rhabditida
3	1	3235	12743	0.0281938	11.8112	0.241582	GO@GO:0016811	GO	GO:0016811	hydrolase activity, acting on carbon-nitrogen (but not peptide) bonds, in linear amides	Rhabditida
39	106	3199	12638	0.0322348	1.45349	0.269021	phenotype@0002277	phenotype	2277	dauer lifespan extended	Rhabditida
12	11	3223	12729	0.000666203	4.30793	0.0121513	GO@GO:0006635	GO	GO:0006635	fatty acid beta-oxidation	Rhabditida
16	11	3222	12733	1.01619e-05	5.74734	0.000309392	phenotype@0000523	phenotype	523	chemical response variant	Rhabditida
8	5	3230	12737	0.00135685	6.30834	0.0229016	GO@GO:0006487	GO	GO:0006487	protein N-linked glycosylation	Rhabditida
22	5	3211	12739	1.42156e-11	17.4512	9.78529e-10	KEGG@cel00510	KEGG	cel00510	N-Glycan biosynthesis	Rhabditida
22	30	3216	12714	0.000243157	2.89887	0.00527351	phenotype@0000529	phenotype	529	cell development variant	Rhabditida
22	16	3211	12725	3.78334e-07	5.44825	1.49745e-05	GO@GO:0042254	GO	GO:0042254	ribosome biogenesis	Rhabditida
3	1	3232	12742	0.02814	11.8213	0.241582	GO@GO:0030688	GO	GO:0030688	preribosome, small subunit precursor	Rhabditida
5	0	3230	12744	0.000339275	Inf	0.0068768	GO@GO:0006518	GO	GO:0006518	peptide metabolic process	Rhabditida
8	5	3230	12738	0.00135626	6.30884	0.0229016	GO@GO:0005507	GO	GO:0005507	copper ion binding	Rhabditida
3	0	3235	12744	0.00831029	Inf	0.0971885	GO@GO:0016715	GO	GO:0016715	oxidoreductase activity, acting on paired donors, with incorporation or reduction of molecular oxygen, reduced ascorbate as one donor, and incorporation of one atom of oxygen	Rhabditida
8	7	3230	12737	0.0045927	4.5061	0.0636108	phenotype@0001990	phenotype	1990	hypoxia resistant	Rhabditida
27	22	3211	12722	7.64816e-08	4.86181	3.47947e-06	phenotype@0000776	phenotype	776	passage through meiosis defective early emb	Rhabditida
8	9	3221	12728	0.0116622	3.51227	0.128756	GO@GO:0016627	GO	GO:0016627	oxidoreductase activity, acting on the CH-CH group of donors	Rhabditida
17	32	3211	12709	0.0128196	2.10259	0.137135	GO@GO:0006486	GO	GO:0006486	protein glycosylation	Rhabditida
5	3	3233	12741	0.0109969	6.56713	0.122125	GO@GO:0000030	GO	GO:0000030	mannosyltransferase activity	Rhabditida
5	2	3232	12742	0.00494291	9.85415	0.0669999	GO@GO:0097502	GO	GO:0097502	mannosylation	Rhabditida
48	50	3190	12694	1.82976e-10	3.81971	1.13774e-08	phenotype@0000518	phenotype	518	development phenotype	Rhabditida
8	6	3225	12737	0.0025825	5.26519	0.0385718	GO@GO:0051539	GO	GO:0051539	4 iron, 4 sulfur cluster binding	Rhabditida
4	0	3233	12743	0.00168121	Inf	0.0265377	GO@GO:0016818	GO	GO:0016818	hydrolase activity, acting on acid anhydrides, in phosphorus-containing anhydrides	Rhabditida
4	3	3234	12741	0.0348256	5.25219	0.269021	phenotype@0000083	phenotype	83	L3 arrest	Rhabditida
18	7	3220	12737	3.48134e-08	10.1694	1.6702e-06	phenotype@0000126	phenotype	126	general pace of development defective early emb	Rhabditida
12	21	3226	12723	0.0236414	2.25353	0.221474	phenotype@0000634	phenotype	634	pharyngeal pumping variant	Rhabditida
10	16	3228	12728	0.0251781	2.4642	0.233657	phenotype@0000295	phenotype	295	thermotolerance increased	Rhabditida
6	6	3232	12737	0.0206076	3.94045	0.196009	GO@GO:0003887	GO	GO:0003887	DNA-directed DNA polymerase activity	Rhabditida
8	11	3228	12729	0.0249491	2.86761	0.232397	GO@GO:0000724	GO	GO:0000724	double-strand break repair via homologous recombination	Rhabditida
13	6	3224	12733	7.45523e-06	8.55553	0.000233263	KEGG@cel03460	KEGG	cel03460	Fanconi anemia pathway	Rhabditida
16	11	3208	12732	9.70734e-06	5.77197	0.000297842	GO@GO:0005759	GO	GO:0005759	mitochondrial matrix	Rhabditida
7	6	3229	12738	0.00749861	4.60176	0.0941389	GO@GO:0004521	GO	GO:0004521	endoribonuclease activity	Rhabditida
4	2	3234	12741	0.017757	7.87799	0.176407	GO@GO:0007031	GO	GO:0007031	peroxisome organization	Rhabditida
23	51	3215	12693	0.0182063	1.78042	0.180377	phenotype@0000673	phenotype	673	brood size variant	Rhabditida
8	5	3230	12739	0.00135568	6.30933	0.0229016	phenotype@0000554	phenotype	554	hypoosmotic shock hypersensitive	Rhabditida
30	19	3208	12725	4.42505e-10	6.26213	2.59472e-08	phenotype@0000040	phenotype	40	one cell arrest early emb	Rhabditida
10	13	3228	12731	0.00976168	3.03346	0.112319	phenotype@0000777	phenotype	777	polar body extrusion defective early emb	Rhabditida
30	17	3208	12727	9.90094e-11	6.99988	6.47734e-09	phenotype@0001977	phenotype	1977	germ cell partition morphology variant	Rhabditida
5	3	3233	12741	0.0109969	6.56713	0.122125	phenotype@0002076	phenotype	2076	cortical granule exocytosis variant	Rhabditida
7	7	3231	12737	0.0124368	3.94167	0.133267	GO@GO:0004177	GO	GO:0004177	aminopeptidase activity	Rhabditida
14	12	3224	12732	0.000153859	4.60672	0.00349984	phenotype@0000048	phenotype	48	hatching variant	Rhabditida
4	1	3234	12743	0.0070501	15.7566	0.0894581	phenotype@0001382	phenotype	1382	protein modification variant	Rhabditida
5	5	3233	12739	0.0344973	3.93985	0.269021	phenotype@0001928	phenotype	1928	extra gonad arms	Rhabditida
3	1	3232	12741	0.028145	11.8203	0.241582	GO@GO:0006491	GO	GO:0006491	N-glycan processing	Rhabditida
23	14	3215	12730	3.24339e-08	6.50394	1.57513e-06	phenotype@0000683	phenotype	683	masculinization of germline	Rhabditida
5	0	3233	12744	0.000340532	Inf	0.0068768	KEGG@cel00072	KEGG	cel00072	Synthesis and degradation of ketone bodies	Rhabditida
3	1	3234	12740	0.0281892	11.8121	0.241582	GO@GO:0048188	GO	GO:0048188	Set1C/COMPASS complex	Rhabditida
6	5	3232	12739	0.0124011	4.7292	0.133267	KEGG@cel00770	KEGG	cel00770	Pantothenate and CoA biosynthesis	Rhabditida
3	1	3235	12743	0.0281938	11.8112	0.241582	phenotype@0001649	phenotype	1649	Fluorouracil resistant	Rhabditida
5	2	3233	12742	0.00494851	9.8511	0.0669999	phenotype@0002035	phenotype	2035	resistant to lectin	Rhabditida
8	3	3230	12741	0.00025721	10.5178	0.00544404	phenotype@0000767	phenotype	767	integrity of membranous organelles defective early emb	Rhabditida
6	8	3232	12736	0.0463472	2.95516	0.299259	phenotype@0000166	phenotype	166	seam cell fusion variant	Rhabditida
3	1	3235	12743	0.0281938	11.8112	0.241582	GO@GO:0006616	GO	GO:0006616	SRP-dependent cotranslational protein targeting to membrane, translocation	Rhabditida
6	1	3232	12743	0.000398713	23.6654	0.00783464	GO@GO:0006383	GO	GO:0006383	transcription by RNA polymerase III	Rhabditida
3	1	3234	12742	0.0281792	11.814	0.241582	GO@GO:0005750	GO	GO:0005750	mitochondrial respiratory chain complex III	Rhabditida
3	1	3234	12742	0.0281792	11.814	0.241582	GO@GO:0006122	GO	GO:0006122	mitochondrial electron transport, ubiquinol to cytochrome c	Rhabditida
12	4	3221	12737	3.71544e-06	11.8569	0.000123577	GO@GO:0070469	GO	GO:0070469	respirasome	Rhabditida
30	69	3208	12675	0.0113802	1.71778	0.125994	phenotype@0001175	phenotype	1175	high incidence male progeny	Rhabditida
17	16	3221	12728	6.39313e-05	4.19803	0.00162727	phenotype@0001302	phenotype	1302	P granule localization defective	Rhabditida
14	27	3224	12717	0.0266609	2.04524	0.241582	phenotype@0000070	phenotype	70	male tail morphology variant	Rhabditida
15	12	3220	12730	5.47382e-05	4.9411	0.00142068	GO@GO:0051603	GO	GO:0051603	proteolysis involved in cellular protein catabolic process	Rhabditida
24	19	3214	12725	2.92946e-07	5.00046	1.20154e-05	phenotype@0001029	phenotype	1029	patchy coloration	Rhabditida
10	13	3228	12731	0.00976168	3.03346	0.112319	phenotype@0002097	phenotype	2097	lysosome morphology variant	Rhabditida
20	11	3218	12733	1.05855e-07	7.19296	4.70756e-06	phenotype@0001864	phenotype	1864	protein transport variant	Rhabditida
5	5	3233	12739	0.0344973	3.93985	0.269021	phenotype@0001485	phenotype	1485	ER stress response variant	Rhabditida
3	0	3235	12743	0.00831185	Inf	0.0971885	GO@GO:0044206	GO	GO:0044206	UMP salvage	Rhabditida
3	1	3235	12743	0.0281938	11.8112	0.241582	GO@GO:0002943	GO	GO:0002943	tRNA dihydrouridine synthesis	Rhabditida
3	1	3235	12743	0.0281938	11.8112	0.241582	GO@GO:0017150	GO	GO:0017150	tRNA dihydrouridine synthase activity	Rhabditida
6	7	3229	12737	0.0317066	3.38103	0.267294	GO@GO:0030234	GO	GO:0030234	enzyme regulator activity	Rhabditida
7	0	3230	12744	1.39163e-05	Inf	0.000415702	GO@GO:0004298	GO	GO:0004298	threonine-type endopeptidase activity	Rhabditida
6	8	3226	12734	0.0460723	2.96019	0.299259	GO@GO:0009055	GO	GO:0009055	electron transfer activity	Rhabditida
6	6	3228	12735	0.020523	3.94471	0.196009	GO@GO:0022900	GO	GO:0022900	electron transport chain	Rhabditida
7	7	3229	12736	0.0124072	3.9438	0.133267	GO@GO:0051537	GO	GO:0051537	2 iron, 2 sulfur cluster binding	Rhabditida
12	19	3223	12723	0.0139223	2.49302	0.147535	KEGG@cel03022	KEGG	cel03022	Basal transcription factors	Rhabditida
18	23	3220	12721	0.000511647	3.09142	0.00968947	phenotype@0000228	phenotype	228	spontaneous mutation rate increased	Rhabditida
17	18	3221	12726	0.000163934	3.73104	0.00368666	phenotype@0000241	phenotype	241	accumulated cell corpses	Rhabditida
8	3	3230	12741	0.00025721	10.5178	0.00544404	phenotype@0001383	phenotype	1383	protein methylation variant	Rhabditida
4	0	3233	12742	0.00168163	Inf	0.0265377	GO@GO:0036402	GO	GO:0036402	proteasome-activating activity	Rhabditida
26	6	3208	12736	2.11277e-13	17.1988	1.74215e-11	KEGG@cel03050	KEGG	cel03050	Proteasome	Rhabditida
13	10	3225	12734	0.000138053	5.13237	0.0032142	phenotype@0000313	phenotype	313	meiotic progression during oogenesis variant	Rhabditida
10	4	3226	12740	5.11146e-05	9.87092	0.00133539	GO@GO:0005852	GO	GO:0005852	eukaryotic translation initiation factor 3 complex	Rhabditida
3	1	3235	12743	0.0281938	11.8112	0.241582	phenotype@0001496	phenotype	1496	metaphase to anaphase transition defect	Rhabditida
11	13	3227	12731	0.00418066	3.33755	0.0588542	phenotype@0001936	phenotype	1936	resistant to protein aggregation induced paralysis	Rhabditida
4	3	3232	12739	0.0347817	5.25462	0.269021	GO@GO:0005682	GO	GO:0005682	U5 snRNP	Rhabditida
3	1	3235	12742	0.0281988	11.8103	0.241582	GO@GO:0017108	GO	GO:0017108	5'-flap endonuclease activity	Rhabditida
6	7	3232	12736	0.0318233	3.37764	0.267294	GO@GO:0006259	GO	GO:0006259	DNA metabolic process	Rhabditida
20	9	3218	12731	1.92179e-08	8.78986	9.44902e-07	KEGG@cel03030	KEGG	cel03030	DNA replication	Rhabditida
23	25	3215	12719	1.58728e-05	3.63926	0.000466122	phenotype@0000112	phenotype	112	protein expression variant	Rhabditida
3	0	3234	12744	0.00830415	Inf	0.0971885	GO@GO:0006490	GO	GO:0006490	oligosaccharide-lipid intermediate biosynthetic process	Rhabditida
12	20	3226	12724	0.0183457	2.36637	0.181531	phenotype@0002082	phenotype	2082	peptide uptake by intestinal cell decreased	Rhabditida
6	7	3232	12734	0.0318416	3.37711	0.267294	GO@GO:0000045	GO	GO:0000045	autophagosome assembly	Rhabditida
7	6	3228	12737	0.00749069	4.60282	0.0941389	GO@GO:0007005	GO	GO:0007005	mitochondrion organization	Rhabditida
3	1	3235	12743	0.0281938	11.8112	0.241582	phenotype@0000140	phenotype	140	stress induced arrest variant	Rhabditida
14	12	3224	12732	0.000153859	4.60672	0.00349984	phenotype@0001384	phenotype	1384	fertility reduced	Rhabditida
3	1	3235	12743	0.0281938	11.8112	0.241582	phenotype@0002266	phenotype	2266	mitochondrial content variant	Rhabditida
18	18	3220	12726	6.51588e-05	3.95172	0.00164267	phenotype@0000280	phenotype	280	breaks in alae	Rhabditida
6	6	3232	12738	0.0206014	3.94076	0.196009	phenotype@0001917	phenotype	1917	protein acetylation variant	Rhabditida
21	42	3217	12702	0.0103244	1.9742	0.118618	phenotype@0000114	phenotype	114	mRNA expression variant	Rhabditida
14	13	3224	12731	0.000260158	4.25206	0.00549176	phenotype@0000674	phenotype	674	slow development	Rhabditida
17	37	3221	12707	0.0344519	1.81251	0.269021	phenotype@0000773	phenotype	773	chromosome segregation variant	Rhabditida
17	12	3221	12732	6.55773e-06	5.59899	0.000207644	phenotype@0001408	phenotype	1408	pattern protein expression variant	Rhabditida
7	5	3231	12739	0.00420068	5.51903	0.0588542	phenotype@0000202	phenotype	202	alae variant	Rhabditida
3	0	3233	12744	0.00829801	Inf	0.0971885	GO@GO:0042176	GO	GO:0042176	regulation of protein catabolic process	Rhabditida
15	9	3223	12735	7.73113e-06	6.5844	0.000238131	phenotype@0000103	phenotype	103	gut granule development variant	Rhabditida
11	16	3227	12728	0.012025	2.7114	0.132025	phenotype@0001410	phenotype	1410	protein expression absent	Rhabditida
3	1	3235	12743	0.0281938	11.8112	0.241582	phenotype@0001200	phenotype	1200	gonad sheath contraction rate reduced	Rhabditida
6	3	3232	12741	0.00327811	7.88287	0.0468031	phenotype@0001725	phenotype	1725	cellular osmotic stress response variant	Rhabditida
6	5	3232	12739	0.0124011	4.7292	0.133267	phenotype@0000232	phenotype	232	CAN cell migration variant	Rhabditida
5	4	3233	12740	0.0206453	4.92509	0.196009	phenotype@0000471	phenotype	471	ALM migration variant	Rhabditida
5	1	3231	12741	0.00169566	19.7116	0.0265377	GO@GO:0043039	GO	GO:0043039	tRNA aminoacylation	Rhabditida
6	4	3231	12740	0.00678464	5.91367	0.0894581	GO@GO:0006400	GO	GO:0006400	tRNA modification	Rhabditida
15	14	3223	12730	0.00016269	4.23134	0.00367959	phenotype@0001943	phenotype	1943	rachis wide	Rhabditida
8	3	3230	12741	0.00025721	10.5178	0.00544404	phenotype@0000179	phenotype	179	neuron degeneration	Rhabditida
3	1	3235	12743	0.0281938	11.8112	0.241582	phenotype@0000319	phenotype	319	large	Rhabditida
3	1	3235	12743	0.0281938	11.8112	0.241582	GO@GO:0030125	GO	GO:0030125	clathrin vesicle coat	Rhabditida
12	8	3226	12736	0.000114767	5.92098	0.00273993	phenotype@0002541	phenotype	2541	radiation induced germ cell apoptosis resistant	Rhabditida
3	1	3233	12743	0.0281547	11.8185	0.241582	GO@GO:0018279	GO	GO:0018279	protein N-linked glycosylation via asparagine	Rhabditida
9	14	3229	12730	0.0294642	2.53421	0.250525	phenotype@0000047	phenotype	47	gastrulation variant	Rhabditida
12	23	3226	12721	0.0374508	2.05731	0.269021	phenotype@0000231	phenotype	231	body size variant	Rhabditida
7	8	3231	12736	0.0193005	3.44897	0.18862	phenotype@0000604	phenotype	604	nervous system morphology variant	Rhabditida
22	14	3216	12730	1.00694e-07	6.21925	4.52894e-06	phenotype@0001018	phenotype	1018	cytokinesis variant emb	Rhabditida
5	5	3233	12739	0.0344973	3.93985	0.269021	phenotype@0002408	phenotype	2408	cytokinesis variant	Rhabditida
8	0	3221	12739	2.77673e-06	Inf	9.3934e-05	GO@GO:0006099	GO	GO:0006099	tricarboxylic acid cycle	Rhabditida
5	1	3231	12742	0.00169515	19.7132	0.0265377	GO@GO:0000974	GO	GO:0000974	Prp19 complex	Rhabditida
3	0	3235	12744	0.00831029	Inf	0.0971885	GO@GO:0017070	GO	GO:0017070	U6 snRNA binding	Rhabditida
3	0	3234	12744	0.00830415	Inf	0.0971885	GO@GO:0071007	GO	GO:0071007	U2-type catalytic step 2 spliceosome	Rhabditida
3	1	3235	12742	0.0281988	11.8103	0.241582	GO@GO:0017069	GO	GO:0017069	snRNA binding	Rhabditida
7	1	3231	12743	9.17861e-05	27.61	0.00222877	GO@GO:0070122	GO	GO:0070122	isopeptidase activity	Rhabditida
20	28	3218	12716	0.000584347	2.82228	0.0109096	phenotype@0001403	phenotype	1403	antibody subcellular localization variant	Rhabditida
11	5	3227	12739	3.66663e-05	8.68315	0.000997425	phenotype@0000243	phenotype	243	engulfment failure by killer cell	Rhabditida
4	1	3234	12743	0.0070501	15.7566	0.0894581	phenotype@0001394	phenotype	1394	cell acidification defective	Rhabditida
12	5	3226	12739	1.041e-05	9.47536	0.000314525	phenotype@0001846	phenotype	1846	phagosome maturation defective	Rhabditida
3	0	3235	12744	0.00831029	Inf	0.0971885	GO@GO:0061063	GO	GO:0061063	positive regulation of nematode larval development	Rhabditida
11	6	3227	12738	8.4803e-05	7.23551	0.00210841	phenotype@0001575	phenotype	1575	ATP levels reduced	Rhabditida
5	2	3233	12742	0.00494851	9.8511	0.0669999	phenotype@0000727	phenotype	727	enzyme activity variant	Rhabditida
7	2	3231	12741	0.000340327	13.7968	0.0068768	GO@GO:0006261	GO	GO:0006261	DNA-dependent DNA replication	Rhabditida
4	1	3233	12743	0.00704348	15.7615	0.0894581	GO@GO:0003689	GO	GO:0003689	DNA clamp loader activity	Rhabditida
4	1	3234	12743	0.0070501	15.7566	0.0894581	GO@GO:0005663	GO	GO:0005663	DNA replication factor C complex	Rhabditida
17	12	3219	12729	6.52928e-06	5.60114	0.000207574	KEGG@cel03420	KEGG	cel03420	Nucleotide excision repair	Rhabditida
9	5	3229	12736	0.000420903	7.09845	0.00808705	KEGG@cel03430	KEGG	cel03430	Mismatch repair	Rhabditida
7	9	3230	12733	0.0284073	3.06573	0.242209	GO@GO:0005741	GO	GO:0005741	mitochondrial outer membrane	Rhabditida
3	0	3231	12744	0.00828574	Inf	0.0971885	GO@GO:0005832	GO	GO:0005832	chaperonin-containing T-complex	Rhabditida
20	14	3218	12730	9.2226e-07	5.65041	3.3489e-05	phenotype@0001953	phenotype	1953	nuclear fallout	Rhabditida
6	7	3232	12737	0.0318142	3.3779	0.267294	phenotype@0004017	phenotype	4017	locomotor coordination variant	Rhabditida
5	2	3232	12742	0.00494291	9.85415	0.0669999	GO@GO:0000727	GO	GO:0000727	double-strand break repair via break-induced replication	Rhabditida
7	10	3228	12729	0.0399855	2.7599	0.269021	GO@GO:0003697	GO	GO:0003697	single-stranded DNA binding	Rhabditida
3	0	3232	12744	0.00829188	Inf	0.0971885	GO@GO:0042555	GO	GO:0042555	MCM complex	Rhabditida
29	29	3209	12715	4.11687e-07	3.96184	1.62135e-05	phenotype@0000508	phenotype	508	nonsense mRNA accumulation	Rhabditida
8	3	3230	12741	0.00025721	10.5178	0.00544404	phenotype@0001150	phenotype	1150	polar body reabsorbed one two early emb	Rhabditida
5	0	3230	12744	0.000339275	Inf	0.0068768	GO@GO:0008641	GO	GO:0008641	ubiquitin-like modifier activating enzyme activity	Rhabditida
5	4	3232	12740	0.0206239	4.92662	0.196009	GO@GO:0045454	GO	GO:0045454	cell redox homeostasis	Rhabditida
5	3	3232	12740	0.010988	6.56865	0.122125	GO@GO:0051028	GO	GO:0051028	mRNA transport	Rhabditida
9	2	3229	12742	2.09944e-05	17.7527	0.00059143	phenotype@0000051	phenotype	51	embryonic terminal arrest variable emb	Rhabditida
4	0	3234	12743	0.00168287	Inf	0.0265377	GO@GO:0008540	GO	GO:0008540	proteasome regulatory particle, base subcomplex	Rhabditida
9	12	3226	12727	0.0155613	2.95856	0.163717	GO@GO:0005635	GO	GO:0005635	nuclear envelope	Rhabditida
4	2	3234	12742	0.017753	7.87861	0.176407	phenotype@0000115	phenotype	115	anterior pharynx variant	Rhabditida
28	60	3210	12684	0.00699845	1.84387	0.0894581	phenotype@0000520	phenotype	520	morphology phenotype	Rhabditida
3	0	3235	12743	0.00831185	Inf	0.0971885	GO@GO:0032801	GO	GO:0032801	receptor catabolic process	Rhabditida
10	14	3228	12730	0.0137481	2.81663	0.146081	phenotype@0001206	phenotype	1206	movement variant	Rhabditida
4	2	3233	12742	0.0177372	7.88105	0.176407	GO@GO:0004407	GO	GO:0004407	histone deacetylase activity	Rhabditida
5	3	3233	12741	0.0109969	6.56713	0.122125	phenotype@0000977	phenotype	977	somatic gonad morphology variant	Rhabditida
13	17	3225	12727	0.00347384	3.01748	0.0494584	phenotype@0000709	phenotype	709	pharyngeal morphology variant	Rhabditida
8	13	3230	12731	0.0459968	2.42536	0.299259	phenotype@0001509	phenotype	1509	rays missing	Rhabditida
9	10	3229	12734	0.00724079	3.54899	0.0914164	phenotype@0000701	phenotype	701	epithelial development variant	Rhabditida
12	9	3226	12735	0.000218435	5.26274	0.00478984	phenotype@0000298	phenotype	298	rays displaced	Rhabditida
3	1	3235	12743	0.0281938	11.8112	0.241582	phenotype@0000732	phenotype	732	DNA metabolism variant	Rhabditida
4	0	3231	12744	0.00167748	Inf	0.0265377	GO@GO:0032446	GO	GO:0032446	protein modification by small protein conjugation	Rhabditida
4	2	3233	12742	0.0177372	7.88105	0.176407	GO@GO:0005847	GO	GO:0005847	mRNA cleavage and polyadenylation specificity factor complex	Rhabditida
5	3	3233	12741	0.0109969	6.56713	0.122125	GO@GO:0009966	GO	GO:0009966	regulation of signal transduction	Rhabditida
7	8	3231	12736	0.0193005	3.44897	0.18862	phenotype@0001011	phenotype	1011	complex phenotype early emb	Rhabditida
12	11	3226	12733	0.000669319	4.30528	0.0121521	phenotype@0001261	phenotype	1261	pale	Rhabditida
8	4	3226	12739	0.000629928	7.89629	0.0116192	GO@GO:0000027	GO	GO:0000027	ribosomal large subunit assembly	Rhabditida
10	7	3225	12737	0.00054271	5.64124	0.01022	GO@GO:0030687	GO	GO:0030687	preribosome, large subunit precursor	Rhabditida
8	5	3230	12739	0.00135568	6.30933	0.0229016	phenotype@0000026	phenotype	26	lipid depleted	Rhabditida
3	1	3235	12743	0.0281938	11.8112	0.241582	phenotype@0002032	phenotype	2032	lectin binding variant	Rhabditida
6	3	3232	12741	0.00327811	7.88287	0.0468031	phenotype@0000411	phenotype	411	rod like larval lethal	Rhabditida
3	1	3235	12743	0.0281938	11.8112	0.241582	phenotype@0001060	phenotype	1060	AWC odorant chemotaxis defective	Rhabditida
5	3	3233	12741	0.0109969	6.56713	0.122125	phenotype@0000046	phenotype	46	pace of P lineage defective early emb	Rhabditida
6	4	3231	12738	0.00678904	5.91275	0.0894581	GO@GO:0009411	GO	GO:0009411	response to UV	Rhabditida
9	4	3228	12738	0.000182926	8.87703	0.00402235	KEGG@cel03440	KEGG	cel03440	Homologous recombination	Rhabditida
4	1	3234	12743	0.0070501	15.7566	0.0894581	phenotype@0001921	phenotype	1921	meiotic DNA double strand break formation variant	Rhabditida
9	6	3229	12738	0.000861773	5.91641	0.0153866	phenotype@0002045	phenotype	2045	cell corpse number decreased	Rhabditida
15	11	3223	12733	3.01575e-05	5.3865	0.000826045	phenotype@0000058	phenotype	58	late larval lethal	Rhabditida
8	5	3230	12739	0.00135568	6.30933	0.0229016	phenotype@0001584	phenotype	1584	chromosome alignment variant	Rhabditida
10	7	3228	12737	0.000546114	5.636	0.01022	phenotype@0001078	phenotype	1078	cytokinesis defective early emb	Rhabditida
6	4	3232	12740	0.0067933	5.91184	0.0894581	phenotype@0001886	phenotype	1886	cleavage furrow termination defective early emb	Rhabditida
7	9	3231	12735	0.028425	3.06527	0.242209	phenotype@0001888	phenotype	1888	fat associated bodies increased	Rhabditida
3	0	3235	12744	0.00831029	Inf	0.0971885	phenotype@0002051	phenotype	2051	ascaroside biosynthesis variant	Rhabditida
11	11	3227	12733	0.00176302	3.94532	0.0270466	phenotype@0001893	phenotype	1893	mitochondrial membrane potential reduced	Rhabditida
12	13	3219	12727	0.00169461	3.64919	0.0265377	GO@GO:0006351	GO	GO:0006351	transcription, DNA-templated	Rhabditida
10	5	3228	12739	0.000125949	7.89139	0.00296731	phenotype@0000045	phenotype	45	developmental delay postembryonic	Rhabditida
16	15	3222	12729	0.00010191	4.21352	0.00246703	phenotype@0001620	phenotype	1620	organism oxidative stress response variant	Rhabditida
3	0	3235	12744	0.00831029	Inf	0.0971885	phenotype@0000466	phenotype	466	high oxygen hypersensitive	Rhabditida
16	11	3222	12733	1.01619e-05	5.74734	0.000309392	phenotype@0001905	phenotype	1905	fewer eggs laid	Rhabditida
8	7	3230	12737	0.0045927	4.5061	0.0636108	phenotype@0000053	phenotype	53	paralyzed arrested elongation two fold	Rhabditida
9	8	3229	12736	0.00282071	4.43673	0.0409701	phenotype@0001668	phenotype	1668	oocyte accumulation	Rhabditida
4	3	3234	12741	0.0348256	5.25219	0.269021	phenotype@0000473	phenotype	473	progressive paralysis	Rhabditida
5	1	3231	12743	0.00169464	19.7147	0.0265377	GO@GO:0000145	GO	GO:0000145	exocyst	Rhabditida
3	0	3235	12744	0.00831029	Inf	0.0971885	GO@GO:0033962	GO	GO:0033962	P-body assembly	Rhabditida
13	20	3225	12724	0.00907826	2.56434	0.105682	phenotype@0000424	phenotype	424	antibody staining variant	Rhabditida
8	3	3230	12741	0.00025721	10.5178	0.00544404	phenotype@0000426	phenotype	426	antibody staining increased	Rhabditida
7	10	3231	12734	0.0400699	2.75843	0.269021	phenotype@0001348	phenotype	1348	chromosome morphology variant	Rhabditida
6	8	3231	12732	0.046348	2.95515	0.299259	GO@GO:0110039	GO	GO:0110039	positive regulation of nematode male tail tip morphogenesis	Rhabditida
7	7	3231	12737	0.0124368	3.94167	0.133267	phenotype@0001129	phenotype	1129	cleavage furrow defective early emb	Rhabditida
4	2	3234	12742	0.017753	7.87861	0.176407	phenotype@0010003	phenotype	10003	cell corpse appearance delayed	Rhabditida
4	3	3234	12741	0.0348256	5.25219	0.269021	phenotype@0002606	phenotype	2606	necrotic cell death decreased	Rhabditida
7	8	3231	12736	0.0193005	3.44897	0.18862	phenotype@0000725	phenotype	725	lipid metabolism variant	Rhabditida
19	20	3219	12724	6.47438e-05	3.75473	0.00163742	phenotype@0001375	phenotype	1375	transgene expression undetectable	Rhabditida
4	2	3234	12742	0.017753	7.87861	0.176407	GO@GO:0005797	GO	GO:0005797	Golgi medial cisterna	Rhabditida
3	1	3235	12743	0.0281938	11.8112	0.241582	phenotype@0001093	phenotype	1093	intestinal physiology variant	Rhabditida
5	2	3233	12740	0.00495136	9.84955	0.0669999	GO@GO:0006614	GO	GO:0006614	SRP-dependent cotranslational protein targeting to membrane	Rhabditida
12	8	3226	12734	0.000114914	5.92005	0.00273993	KEGG@cel03060	KEGG	cel03060	Protein export	Rhabditida
7	4	3231	12740	0.00212017	6.89918	0.0320051	phenotype@0001570	phenotype	1570	body wall muscle actin organization defective	Rhabditida
6	3	3232	12741	0.00327811	7.88287	0.0468031	phenotype@0001396	phenotype	1396	pumping absent	Rhabditida
8	3	3230	12741	0.00025721	10.5178	0.00544404	phenotype@0001587	phenotype	1587	actin organization biogenesis phenotype	Rhabditida
6	4	3232	12740	0.0067933	5.91184	0.0894581	phenotype@0001108	phenotype	1108	P0 spindle rotation failure early emb	Rhabditida
9	4	3228	12738	0.000182926	8.87703	0.00402235	KEGG@cel00900	KEGG	cel00900	Terpenoid backbone biosynthesis	Rhabditida
11	12	3227	12732	0.00276557	3.61629	0.0407928	phenotype@0001006	phenotype	1006	pharyngeal pumping rate variant	Rhabditida
5	4	3233	12739	0.0206507	4.92471	0.196009	KEGG@cel00130	KEGG	cel00130	Ubiquinone and other terpenoid-quinone biosynthesis	Rhabditida
8	8	3230	12736	0.00756889	3.94258	0.0945037	phenotype@0000082	phenotype	82	L2 arrest	Rhabditida
8	2	3229	12742	8.52576e-05	15.7797	0.00210841	GO@GO:0072546	GO	GO:0072546	EMC complex	Rhabditida
5	3	3233	12741	0.0109969	6.56713	0.122125	GO@GO:0000138	GO	GO:0000138	Golgi trans cisterna	Rhabditida
4	1	3234	12743	0.0070501	15.7566	0.0894581	phenotype@0002255	phenotype	2255	amino acid metabolism variant	Rhabditida
5	5	3233	12737	0.0345147	3.93923	0.269021	GO@GO:0001522	GO	GO:0001522	pseudouridine synthesis	Rhabditida
5	5	3233	12738	0.034506	3.93954	0.269021	GO@GO:0009451	GO	GO:0009451	RNA modification	Rhabditida
5	3	3233	12740	0.0109999	6.56662	0.122125	GO@GO:0009982	GO	GO:0009982	pseudouridine synthase activity	Rhabditida
4	2	3230	12742	0.0176898	7.88837	0.176407	GO@GO:0005771	GO	GO:0005771	multivesicular body	Rhabditida
5	3	3233	12741	0.0109969	6.56713	0.122125	phenotype@0000949	phenotype	949	pseudocoelom morphology variant	Rhabditida
3	0	3235	12744	0.00831029	Inf	0.0971885	GO@GO:0002949	GO	GO:0002949	tRNA threonylcarbamoyladenosine modification	Rhabditida
6	1	3232	12742	0.000398858	23.6635	0.00783464	GO@GO:0005684	GO	GO:0005684	U2-type spliceosomal complex	Rhabditida
5	4	3232	12738	0.0206348	4.92585	0.196009	GO@GO:0042338	GO	GO:0042338	cuticle development involved in collagen and cuticulin-based cuticle molting cycle	Rhabditida
6	8	3232	12736	0.0463472	2.95516	0.299259	phenotype@0002539	phenotype	2539	antimicrobial gene expression increased	Rhabditida
7	7	3231	12737	0.0124368	3.94167	0.133267	phenotype@0001151	phenotype	1151	pronucleus centrosomes defective early emb	Rhabditida
3	1	3235	12743	0.0281938	11.8112	0.241582	GO@GO:0008175	GO	GO:0008175	tRNA methyltransferase activity	Rhabditida
8	5	3227	12739	0.00134875	6.3152	0.0229016	GO@GO:0008137	GO	GO:0008137	NADH dehydrogenase (ubiquinone) activity	Rhabditida
14	7	3218	12734	5.11953e-06	7.91281	0.000165413	GO@GO:0005747	GO	GO:0005747	mitochondrial respiratory chain complex I	Rhabditida
10	4	3225	12738	5.1058e-05	9.87243	0.00133539	GO@GO:0006120	GO	GO:0006120	mitochondrial electron transport, NADH to ubiquinone	Rhabditida
10	17	3228	12727	0.0329152	2.31909	0.269021	phenotype@0000670	phenotype	670	spermatogenesis variant	Rhabditida
5	0	3233	12744	0.000340532	Inf	0.0068768	GO@GO:0008299	GO	GO:0008299	isoprenoid biosynthetic process	Rhabditida
3	0	3235	12744	0.00831029	Inf	0.0971885	GO@GO:0005047	GO	GO:0005047	signal recognition particle binding	Rhabditida
4	3	3233	12741	0.0347962	5.25382	0.269021	GO@GO:0045047	GO	GO:0045047	protein targeting to ER	Rhabditida
3	0	3235	12744	0.00831029	Inf	0.0971885	GO@GO:0016012	GO	GO:0016012	sarcoglycan complex	Rhabditida
26	17	3208	12724	9.29134e-09	6.06521	4.83883e-07	GO@GO:0005681	GO	GO:0005681	spliceosomal complex	Rhabditida
6	1	3232	12743	0.000398713	23.6654	0.00783464	phenotype@0001834	phenotype	1834	mRNA splicing variant	Rhabditida
10	6	3228	12738	0.000274755	6.57575	0.00575386	phenotype@0000147	phenotype	147	organism starvation response variant	Rhabditida
5	3	3228	12740	0.0109404	6.57679	0.122125	GO@GO:0042273	GO	GO:0042273	ribosomal large subunit biogenesis	Rhabditida
5	4	3233	12740	0.0206453	4.92509	0.196009	phenotype@0001033	phenotype	1033	proximal germ cell proliferation variant	Rhabditida
9	1	3226	12742	4.63618e-06	35.5427	0.000151653	GO@GO:0005839	GO	GO:0005839	proteasome core complex	Rhabditida
8	10	3230	12734	0.0175129	3.15351	0.176407	phenotype@0001034	phenotype	1034	pronuclear nuclear appearance defective early emb	Rhabditida
7	2	3231	12742	0.000340187	13.7979	0.0068768	phenotype@0000363	phenotype	363	cell division slow	Rhabditida
8	11	3230	12733	0.0249835	2.86673	0.232397	phenotype@0000759	phenotype	759	spindle defective early emb	Rhabditida
12	14	3226	12725	0.00261429	3.38099	0.0387541	KEGG@cel04350	KEGG	cel04350	TGF-beta signaling pathway	Rhabditida
3	1	3235	12742	0.0281988	11.8103	0.241582	GO@GO:1990502	GO	GO:1990502	dense core granule maturation	Rhabditida
10	7	3228	12737	0.000546114	5.636	0.01022	phenotype@0001762	phenotype	1762	uptake of yolk defective	Rhabditida
5	0	3233	12744	0.000340532	Inf	0.0068768	phenotype@0000201	phenotype	201	cuticle development variant	Rhabditida
3	1	3235	12743	0.0281938	11.8112	0.241582	phenotype@0000917	phenotype	917	excretory duct cell morphology variant	Rhabditida
5	0	3233	12744	0.000340532	Inf	0.0068768	phenotype@0001812	phenotype	1812	embryonic rupture	Rhabditida
6	7	3231	12734	0.0318057	3.37815	0.267294	GO@GO:0000070	GO	GO:0000070	mitotic sister chromatid segregation	Rhabditida
3	1	3235	12743	0.0281938	11.8112	0.241582	phenotype@0000504	phenotype	504	nuclear division variant	Rhabditida
8	2	3230	12742	8.54167e-05	15.7749	0.00210841	phenotype@0002092	phenotype	2092	early endosome morphology variant	Rhabditida
3	1	3235	12743	0.0281938	11.8112	0.241582	phenotype@0002091	phenotype	2091	late endosome morphology variant	Rhabditida
7	2	3229	12741	0.000339226	13.8053	0.0068768	GO@GO:0000502	GO	GO:0000502	proteasome complex	Rhabditida
6	3	3232	12740	0.00327922	7.88225	0.0468031	GO@GO:0006488	GO	GO:0006488	dolichol-linked oligosaccharide biosynthetic process	Rhabditida
11	10	3224	12728	0.00107414	4.34214	0.0187701	GO@GO:0003899	GO	GO:0003899	DNA-directed 5'-3' RNA polymerase activity	Rhabditida
13	25	3225	12719	0.0315699	2.05077	0.267294	phenotype@0001586	phenotype	1586	multiple anchor cells	Rhabditida
7	5	3229	12739	0.00418839	5.52245	0.0588542	GO@GO:0016226	GO	GO:0016226	iron-sulfur cluster assembly	Rhabditida
3	0	3235	12744	0.00831029	Inf	0.0971885	GO@GO:0048257	GO	GO:0048257	3'-flap endonuclease activity	Rhabditida
4	2	3234	12742	0.017753	7.87861	0.176407	phenotype@0001685	phenotype	1685	postsynaptic region morphology variant	Rhabditida
3	1	3235	12743	0.0281938	11.8112	0.241582	phenotype@0000675	phenotype	675	zygotic lethal	Rhabditida
4	3	3234	12741	0.0348256	5.25219	0.269021	phenotype@0002011	phenotype	2011	bivulva	Rhabditida
7	5	3231	12739	0.00420068	5.51903	0.0588542	phenotype@0000071	phenotype	71	head morphology variant	Rhabditida
9	9	3229	12735	0.00463525	3.94349	0.064036	phenotype@0000745	phenotype	745	transposon silencing variant	Rhabditida
4	3	3234	12741	0.0348256	5.25219	0.269021	phenotype@0000406	phenotype	406	lumpy	Rhabditida
12	19	3226	12725	0.0139893	2.49109	0.148047	phenotype@0000712	phenotype	712	germ cell ionizing radiation response variant	Rhabditida
10	7	3224	12734	0.000542439	5.64166	0.01022	GO@GO:0002181	GO	GO:0002181	cytoplasmic translation	Rhabditida
3	1	3234	12743	0.0281742	11.8149	0.241582	GO@GO:0008180	GO	GO:0008180	COP9 signalosome	Rhabditida
15	9	3222	12733	7.71899e-06	6.58541	0.000238131	GO@GO:0005763	GO	GO:0005763	mitochondrial small ribosomal subunit	Rhabditida
7	2	3231	12742	0.000340187	13.7979	0.0068768	phenotype@0001767	phenotype	1767	commissure handedness defective	Rhabditida
16	23	3222	12721	0.00245087	2.74619	0.036675	phenotype@0000461	phenotype	461	paraquat resistant	Rhabditida
6	8	3232	12736	0.0463472	2.95516	0.299259	phenotype@0000121	phenotype	121	translation variant	Rhabditida
7	8	3231	12736	0.0193005	3.44897	0.18862	phenotype@0002423	phenotype	2423	hypoxia response variant	Rhabditida
5	4	3233	12740	0.0206453	4.92509	0.196009	phenotype@0000592	phenotype	592	copper response variant	Rhabditida
4	1	3234	12743	0.0070501	15.7566	0.0894581	phenotype@0001640	phenotype	1640	acidification level defective	Rhabditida
4	3	3233	12741	0.0347962	5.25382	0.269021	GO@GO:0006744	GO	GO:0006744	ubiquinone biosynthetic process	Rhabditida
3	1	3234	12742	0.0281792	11.814	0.241582	GO@GO:0061077	GO	GO:0061077	chaperone-mediated protein folding	Rhabditida
8	7	3230	12737	0.0045927	4.5061	0.0636108	phenotype@0001044	phenotype	1044	cortical dynamics defective early emb	Rhabditida
6	4	3231	12735	0.00679564	5.91135	0.0894581	GO@GO:0015934	GO	GO:0015934	large ribosomal subunit	Rhabditida
3	1	3235	12743	0.0281938	11.8112	0.241582	phenotype@0000899	phenotype	899	epithelial cell morphology variant	Rhabditida
8	9	3228	12733	0.0117631	3.50605	0.129509	GO@GO:0071011	GO	GO:0071011	precatalytic spliceosome	Rhabditida
19	11	3216	12731	3.3749e-07	6.83652	1.34928e-05	GO@GO:0005762	GO	GO:0005762	mitochondrial large ribosomal subunit	Rhabditida
6	8	3231	12734	0.0463226	2.95561	0.299259	GO@GO:0005666	GO	GO:0005666	RNA polymerase III complex	Rhabditida
12	13	3226	12731	0.00171754	3.64241	0.0267638	KEGG@cel03020	KEGG	cel03020	RNA polymerase	Rhabditida
17	11	3221	12733	3.34574e-06	6.10841	0.000112224	phenotype@0001896	phenotype	1896	gamma ray induced apoptosis decreased	Rhabditida
8	9	3221	12730	0.0116533	3.51282	0.128756	GO@GO:0022627	GO	GO:0022627	cytosolic small ribosomal subunit	Rhabditida
5	1	3233	12741	0.00169968	19.6994	0.0265377	GO@GO:0000245	GO	GO:0000245	spliceosomal complex assembly	Rhabditida
3	1	3235	12743	0.0281938	11.8112	0.241582	GO@GO:0005851	GO	GO:0005851	eukaryotic translation initiation factor 2B complex	Rhabditida
3	0	3235	12744	0.00831029	Inf	0.0971885	GO@GO:0030031	GO	GO:0030031	cell projection assembly	Rhabditida
8	12	3230	12732	0.0344186	2.62754	0.269021	KEGG@cel00350	KEGG	cel00350	Tyrosine metabolism	Rhabditida
5	2	3233	12740	0.00495136	9.84955	0.0669999	GO@GO:0071014	GO	GO:0071014	post-mRNA release spliceosomal complex	Rhabditida
4	1	3234	12742	0.00705178	15.7554	0.0894581	GO@GO:0051276	GO	GO:0051276	chromosome organization	Rhabditida
8	13	3230	12731	0.0459968	2.42536	0.299259	phenotype@0001937	phenotype	1937	hypersensitive to protein aggregation induced paralysis	Rhabditida
4	3	3234	12741	0.0348256	5.25219	0.269021	phenotype@0000623	phenotype	623	nervous system development variant	Rhabditida
10	5	3227	12736	0.000125884	7.89198	0.00296731	GO@GO:0005686	GO	GO:0005686	U2 snRNP	Rhabditida
5	3	3228	12741	0.0109374	6.5773	0.122125	GO@GO:0007034	GO	GO:0007034	vacuolar transport	Rhabditida
4	0	3234	12744	0.00168245	Inf	0.0265377	phenotype@0002075	phenotype	2075	eggshell formation variant	Rhabditida
5	5	3232	12738	0.0344719	3.94076	0.269021	GO@GO:0005665	GO	GO:0005665	RNA polymerase II, core complex	Rhabditida
6	5	3231	12736	0.0123974	4.72955	0.133267	GO@GO:0006368	GO	GO:0006368	transcription elongation from RNA polymerase II promoter	Rhabditida
3	0	3235	12744	0.00831029	Inf	0.0971885	GO@GO:0032968	GO	GO:0032968	positive regulation of transcription elongation from RNA polymerase II promoter	Rhabditida
17	8	3218	12733	3.13601e-07	8.40665	1.26656e-05	GO@GO:0032040	GO	GO:0032040	small-subunit processome	Rhabditida
5	1	3233	12742	0.00169917	19.701	0.0265377	GO@GO:0070181	GO	GO:0070181	small ribosomal subunit rRNA binding	Rhabditida
4	0	3234	12744	0.00168245	Inf	0.0265377	GO@GO:0007033	GO	GO:0007033	vacuole organization	Rhabditida
6	4	3232	12737	0.00679991	5.91045	0.0894581	GO@GO:0005736	GO	GO:0005736	RNA polymerase I complex	Rhabditida
9	8	3229	12736	0.00282071	4.43673	0.0409701	phenotype@0001141	phenotype	1141	nucleus reforms cell division remnant early emb	Rhabditida
3	1	3234	12743	0.0281742	11.8149	0.241582	GO@GO:0045324	GO	GO:0045324	late endosome to vacuole transport	Rhabditida
4	0	3234	12744	0.00168245	Inf	0.0265377	phenotype@0001170	phenotype	1170	sterile F0 48 hours post injection	Rhabditida
5	2	3233	12742	0.00494851	9.8511	0.0669999	GO@GO:0005885	GO	GO:0005885	Arp2/3 protein complex	Rhabditida
5	3	3233	12741	0.0109969	6.56713	0.122125	GO@GO:0034314	GO	GO:0034314	Arp2/3 complex-mediated actin nucleation	Rhabditida
5	2	3233	12742	0.00494851	9.8511	0.0669999	phenotype@0001030	phenotype	1030	pronuclear envelope defective early emb	Rhabditida
4	3	3234	12741	0.0348256	5.25219	0.269021	phenotype@0000965	phenotype	965	somatic cell death variant	Rhabditida
5	5	3233	12739	0.0344973	3.93985	0.269021	phenotype@0001495	phenotype	1495	cell division precocious	Rhabditida
3	1	3235	12743	0.0281938	11.8112	0.241582	GO@GO:0015030	GO	GO:0015030	Cajal body	Rhabditida
6	5	3231	12739	0.0123859	4.73066	0.133267	GO@GO:0005788	GO	GO:0005788	endoplasmic reticulum lumen	Rhabditida
5	4	3232	12738	0.0206348	4.92585	0.196009	GO@GO:0000470	GO	GO:0000470	maturation of LSU-rRNA	Rhabditida
4	3	3234	12741	0.0348256	5.25219	0.269021	phenotype@0000245	phenotype	245	SM migration variant	Rhabditida
4	2	3234	12740	0.017761	7.87737	0.176407	GO@GO:0005687	GO	GO:0005687	U4 snRNP	Rhabditida
3	0	3235	12744	0.00831029	Inf	0.0971885	GO@GO:0000244	GO	GO:0000244	spliceosomal tri-snRNP complex assembly	Rhabditida
4	1	3234	12743	0.0070501	15.7566	0.0894581	phenotype@0000883	phenotype	883	nerve ring development variant	Rhabditida
4	3	3234	12741	0.0348256	5.25219	0.269021	GO@GO:0000460	GO	GO:0000460	maturation of 5.8S rRNA	Rhabditida
3	0	3234	12743	0.00830571	Inf	0.0971885	GO@GO:0042274	GO	GO:0042274	ribosomal small subunit biogenesis	Rhabditida
5	4	3233	12740	0.0206453	4.92509	0.196009	phenotype@0001140	phenotype	1140	neuron migration variant	Rhabditida
7	3	3230	12739	0.00093393	9.20081	0.0165519	GO@GO:0000028	GO	GO:0000028	ribosomal small subunit assembly	Rhabditida
4	2	3234	12742	0.017753	7.87861	0.176407	phenotype@0000475	phenotype	475	muscle detached	Rhabditida
3	1	3233	12743	0.0281547	11.8185	0.241582	GO@GO:0032509	GO	GO:0032509	endosome transport via multivesicular body sorting pathway	Rhabditida
6	3	3232	12741	0.00327811	7.88287	0.0468031	phenotype@0001346	phenotype	1346	actin cytoskeleton dynamics phenotype	Rhabditida
3	1	3235	12743	0.0281938	11.8112	0.241582	GO@GO:0061617	GO	GO:0061617	MICOS complex	Rhabditida
5	3	3233	12741	0.0109969	6.56713	0.122125	phenotype@0000143	phenotype	143	organism UV response variant	Rhabditida
3	1	3233	12743	0.0281547	11.8185	0.241582	GO@GO:0005761	GO	GO:0005761	mitochondrial ribosome	Rhabditida
4	1	3234	12743	0.0070501	15.7566	0.0894581	phenotype@0001486	phenotype	1486	unfolded protein accumulation	Rhabditida
4	0	3234	12744	0.00168245	Inf	0.0265377	phenotype@0002015	phenotype	2015	voltage measurement variant	Rhabditida
7	4	3228	12736	0.0021138	6.90343	0.0320051	GO@GO:0000462	GO	GO:0000462	maturation of SSU-rRNA from tricistronic rRNA transcript (SSU-rRNA, 5.8S rRNA, LSU-rRNA)	Rhabditida
3	0	3235	12744	0.00831029	Inf	0.0971885	phenotype@0002429	phenotype	2429	protein glycosylation variant	Rhabditida
4	2	3234	12742	0.017753	7.87861	0.176407	GO@GO:0030515	GO	GO:0030515	snoRNA binding	Rhabditida
5	4	3233	12739	0.0206507	4.92471	0.196009	GO@GO:0030686	GO	GO:0030686	90S preribosome	Rhabditida
3	1	3234	12743	0.0281742	11.8149	0.241582	GO@GO:0006624	GO	GO:0006624	vacuolar protein processing	Rhabditida
5	0	3232	12744	0.000340113	Inf	0.0068768	GO@GO:0006309	GO	GO:0006309	apoptotic DNA fragmentation	Rhabditida
5	3	3233	12741	0.0109969	6.56713	0.122125	phenotype@0010004	phenotype	10004	cell corpse degradation variant	Rhabditida
4	3	3234	12741	0.0348256	5.25219	0.269021	phenotype@0001754	phenotype	1754	endosome to lysosome trafficking defective	Rhabditida
3	0	3235	12744	0.00831029	Inf	0.0971885	GO@GO:0030132	GO	GO:0030132	clathrin coat of coated pit	Rhabditida
3	1	3235	12743	0.0281938	11.8112	0.241582	GO@GO:0016780	GO	GO:0016780	phosphotransferase activity, for other substituted phosphate groups	Rhabditida
3	0	3235	12744	0.00831029	Inf	0.0971885	phenotype@0002172	phenotype	2172	pathogen release variant	Rhabditida
4	3	3234	12741	0.0348256	5.25219	0.269021	phenotype@0001163	phenotype	1163	pronucleus formation failure early emb	Rhabditida
3	1	3235	12743	0.0281938	11.8112	0.241582	phenotype@0000151	phenotype	151	anterior pharynx extra cells	Rhabditida
3	1	3235	12743	0.0281938	11.8112	0.241582	phenotype@0000379	phenotype	379	head notched	Rhabditida
4	3	3234	12741	0.0348256	5.25219	0.269021	GO@GO:0004175	GO	GO:0004175	endopeptidase activity	Rhabditida
4	0	3234	12743	0.00168287	Inf	0.0265377	GO@GO:0017119	GO	GO:0017119	Golgi transport complex	Rhabditida
3	0	3235	12743	0.00831185	Inf	0.0971885	GO@GO:0008250	GO	GO:0008250	oligosaccharyltransferase complex	Rhabditida
4	1	3234	12743	0.0070501	15.7566	0.0894581	GO@GO:0017183	GO	GO:0017183	peptidyl-diphthamide biosynthetic process from peptidyl-histidine	Rhabditida
3	0	3235	12743	0.00831185	Inf	0.0971885	GO@GO:0034388	GO	GO:0034388	Pwp2p-containing subcomplex of 90S preribosome	Rhabditida

## Sheet: Enrichment_analysis_PO_Caenorha
Relevant genes in term	bckgr-genes in term	Relevant genes not in term	bckgr-genes not in term	p.value	fc	p.value_adj	names	annotation	Term	Name	Species
52	1097	494	14031	0.0310096	1.34632	1	GO@GO:0005737	GO	GO:0005737	cytoplasm	Caenorhabditis
19	319	537	15049	0.0286458	1.66908	1	GO@GO:0004672	GO	GO:0004672	protein kinase activity	Caenorhabditis
13	154	544	15249	0.00579428	2.36608	1	GO@GO:0004674	GO	GO:0004674	protein serine/threonine kinase activity	Caenorhabditis
19	339	537	15025	0.0468667	1.5681	1	GO@GO:0006468	GO	GO:0006468	protein phosphorylation	Caenorhabditis
6	48	551	15361	0.0109674	3.48429	1	GO@GO:0048471	GO	GO:0048471	perinuclear region of cytoplasm	Caenorhabditis
12	108	545	15302	0.000989957	3.11926	0.671015	GO@GO:0006470	GO	GO:0006470	protein dephosphorylation	Caenorhabditis
154	3276	371	11697	5.40722e-05	1.48206	0.182078	GO@	GO	NA	characteristic of	Caenorhabditis
154	3276	371	11697	5.40722e-05	1.48206	0.182078	GO@	GO	NA	characteristic of part of	Caenorhabditis
21	272	536	15111	0.00153505	2.17659	0.810098	GO@GO:0016301	GO	GO:0016301	kinase activity	Caenorhabditis
20	267	537	15114	0.00272881	2.10811	1	GO@GO:0016310	GO	GO:0016310	phosphorylation	Caenorhabditis
62	1263	496	14161	0.0107329	1.40148	1	phenotype@0000688	phenotype	688	sterile	Caenorhabditis
4	29	554	15389	0.0270229	3.83112	1	GO@GO:0007283	GO	GO:0007283	spermatogenesis	Caenorhabditis
3	16	553	15404	0.0268248	5.22095	1	GO@GO:0040027	GO	GO:0040027	negative regulation of vulval development	Caenorhabditis
4	29	554	15395	0.0269905	3.83261	1	phenotype@0001152	phenotype	1152	pronuclear migration defective early emb	Caenorhabditis
4	33	554	15391	0.0390966	3.36698	1	phenotype@0002501	phenotype	2501	ectopic cleavage furrow early emb	Caenorhabditis
13	93	545	15331	8.11212e-05	3.93169	0.182078	phenotype@0000823	phenotype	823	germline proliferation variant	Caenorhabditis
6	58	552	15358	0.0239708	2.87785	1	GO@GO:0004713	GO	GO:0004713	protein tyrosine kinase activity	Caenorhabditis
10	67	547	15354	0.000328344	4.18874	0.433195	GO@GO:0018105	GO	GO:0018105	peptidyl-serine phosphorylation	Caenorhabditis
5	38	549	15369	0.0160583	3.68265	1	GO@GO:0007049	GO	GO:0007049	cell cycle	Caenorhabditis
5	31	553	15392	0.0078519	4.48842	1	GO@GO:0004715	GO	GO:0004715	non-membrane spanning protein tyrosine kinase activity	Caenorhabditis
5	33	553	15389	0.00987864	4.21565	1	GO@GO:0031234	GO	GO:0031234	extrinsic component of cytoplasmic side of plasma membrane	Caenorhabditis
5	48	553	15370	0.0370331	2.89485	1	GO@GO:0005102	GO	GO:0005102	signaling receptor binding	Caenorhabditis
6	45	552	15377	0.00838122	3.71332	1	GO@GO:0007169	GO	GO:0007169	transmembrane receptor protein tyrosine kinase signaling pathway	Caenorhabditis
6	47	552	15374	0.0100821	3.55497	1	GO@GO:0004714	GO	GO:0004714	transmembrane receptor protein tyrosine kinase activity	Caenorhabditis
12	88	546	15336	0.000186513	3.82983	0.295287	phenotype@0001208	phenotype	1208	RNAi resistant	Caenorhabditis
6	25	552	15395	0.00061709	6.69148	0.610611	GO@GO:0004722	GO	GO:0004722	protein serine/threonine phosphatase activity	Caenorhabditis
3	17	555	15397	0.0310671	4.89498	1	GO@GO:0009058	GO	GO:0009058	biosynthetic process	Caenorhabditis
5	18	553	15405	0.0010172	7.73702	0.671015	GO@GO:0106306	GO	GO:0106306	protein serine phosphatase activity	Caenorhabditis
5	18	553	15405	0.0010172	7.73702	0.671015	GO@GO:0106307	GO	GO:0106307	protein threonine phosphatase activity	Caenorhabditis
4	17	554	15399	0.00549062	6.53833	1	GO@GO:0051321	GO	GO:0051321	meiotic cell cycle	Caenorhabditis
6	51	552	15370	0.0141874	3.27532	1	GO@GO:0018108	GO	GO:0018108	peptidyl-tyrosine phosphorylation	Caenorhabditis
4	22	554	15402	0.0119335	5.05399	1	phenotype@0001105	phenotype	1105	P0 spindle position abnormal	Caenorhabditis
4	29	553	15382	0.026911	3.83629	1	GO@GO:0003682	GO	GO:0003682	chromatin binding	Caenorhabditis
13	196	545	15228	0.0320815	1.85323	1	phenotype@0000436	phenotype	436	protein subcellular localization variant	Caenorhabditis
6	63	552	15361	0.0331198	2.65002	1	phenotype@0001143	phenotype	1143	multiple nuclei early emb	Caenorhabditis
3	14	555	15410	0.0199827	5.9473	1	phenotype@0000628	phenotype	628	spindle assembly defective early emb	Caenorhabditis
4	25	554	15399	0.0174663	4.44635	1	phenotype@0001875	phenotype	1875	anaphase bridging	Caenorhabditis
4	4	554	15420	9.2005e-05	27.8099	0.182078	phenotype@0001876	phenotype	1876	centriole biogenesis variant	Caenorhabditis
3	19	555	15405	0.039814	4.38182	1	phenotype@0000743	phenotype	743	RNAi response variant	Caenorhabditis
3	12	555	15409	0.0140858	6.93883	1	GO@GO:0031305	GO	GO:0031305	integral component of mitochondrial inner membrane	Caenorhabditis
3	6	555	15418	0.00303778	13.8824	1	phenotype@0001824	phenotype	1824	meiotic progression prophase variant	Caenorhabditis
4	15	553	15405	0.00373114	7.42478	1	GO@GO:0031047	GO	GO:0031047	gene silencing by RNA	Caenorhabditis
3	18	555	15406	0.0352735	4.62546	1	phenotype@0001258	phenotype	1258	RNAi enhanced	Caenorhabditis
3	7	555	15417	0.00422783	11.8982	1	phenotype@0000764	phenotype	764	embryonic cell organization biogenesis variant	Caenorhabditis
5	33	553	15391	0.00987363	4.2162	1	phenotype@0001130	phenotype	1130	cytokinesis fails early emb	Caenorhabditis
4	13	554	15411	0.00243434	8.55667	1	phenotype@0000511	phenotype	511	nuclear positioning variant	Caenorhabditis
3	21	554	15399	0.0495502	3.97032	1	GO@GO:0003730	GO	GO:0003730	mRNA 3'-UTR binding	Caenorhabditis
4	20	554	15404	0.00896013	5.55952	1	phenotype@0001106	phenotype	1106	spindle orientation variant AB or P1 early emb	Caenorhabditis
3	12	555	15410	0.0140834	6.93928	1	GO@GO:0000184	GO	GO:0000184	nuclear-transcribed mRNA catabolic process, nonsense-mediated decay	Caenorhabditis
7	67	551	15357	0.0145789	2.91156	1	phenotype@0000673	phenotype	673	brood size variant	Caenorhabditis
4	19	554	15405	0.00767478	5.85196	1	phenotype@0000777	phenotype	777	polar body extrusion defective early emb	Caenorhabditis
6	60	552	15352	0.0274511	2.78085	1	GO@GO:0009986	GO	GO:0009986	cell surface	Caenorhabditis
13	86	545	15338	3.93928e-05	4.25343	0.182078	phenotype@0001175	phenotype	1175	high incidence male progeny	Caenorhabditis
8	46	550	15378	0.000530174	4.86212	0.599551	phenotype@0000773	phenotype	773	chromosome segregation variant	Caenorhabditis
3	19	555	15405	0.039814	4.38182	1	phenotype@0001215	phenotype	1215	germ cell mitosis variant	Caenorhabditis
4	31	554	15393	0.0327154	3.58465	1	phenotype@0000231	phenotype	231	body size variant	Caenorhabditis
3	15	555	15409	0.0233703	5.55131	1	phenotype@0001378	phenotype	1378	mitotic chromosome segregation variant	Caenorhabditis
6	27	552	15397	0.000873811	6.19676	0.671015	phenotype@0000424	phenotype	424	antibody staining variant	Caenorhabditis
3	19	555	15405	0.039814	4.38182	1	phenotype@0002163	phenotype	2163	oxygen consumption decreased	Caenorhabditis
3	14	555	15410	0.0199827	5.9473	1	phenotype@0001141	phenotype	1141	nucleus reforms cell division remnant early emb	Caenorhabditis
3	15	553	15406	0.023171	5.57028	1	GO@GO:0006417	GO	GO:0006417	regulation of translation	Caenorhabditis
3	11	555	15413	0.0115581	7.56974	1	phenotype@0000357	phenotype	357	unfertilized oocytes laid	Caenorhabditis

## Sheet: STRING_Enrichment_analysis_PO_C
#category	term ID	term description	observed gene count	background gene count	strength	false discovery rate	matching proteins in your network (IDs)
GO Process	GO:0022402	Cell cycle process	25	326	0.84	3.61e-10	6239.C09G9.6,6239.C25A1.9a,6239.C25G4.5,6239.C29E4.2,6239.F10E9.8,6239.F10G7.4,6239.F25B5.2.1,6239.F29D11.2,6239.F32H2.3.1,6239.F33G12.4.1,6239.F35B12.5a,6239.F54C8.3,6239.F55C5.4,6239.F55G1.4,6239.F56A3.4,6239.K02B12.8b,6239.K06A5.7.1,6239.K07F5.13c,6239.K08E7.3,6239.K10B2.5,6239.T03F1.9,6239.T06E4.3a,6239.Y39G10AR.12a,6239.Y39G10AR.13.1,6239.Y39G10AR.2a
GO Process	GO:0007049	Cell cycle	27	431	0.75	1.56e-09	6239.C09G9.6,6239.C25A1.9a,6239.C25G4.5,6239.C29E4.2,6239.F10E9.8,6239.F10G7.4,6239.F15H10.3b,6239.F25B5.2.1,6239.F29D11.2,6239.F32H2.3.1,6239.F33G12.4.1,6239.F35B12.5a,6239.F54C8.3,6239.F54C9.8,6239.F55C5.4,6239.F55G1.4,6239.F56A3.4,6239.K02B12.8b,6239.K06A5.7.1,6239.K07F5.13c,6239.K08E7.3,6239.K10B2.5,6239.T03F1.9,6239.T06E4.3a,6239.Y39G10AR.12a,6239.Y39G10AR.13.1,6239.Y39G10AR.2a
GO Process	GO:0006996	Organelle organization	38	1006	0.53	3.89e-08	6239.C07H6.6,6239.C09G9.6,6239.C25A1.9a,6239.C25G4.5,6239.C29E4.2,6239.C33H5.6,6239.C43E11.3a,6239.F10E9.8,6239.F10G7.4,6239.F11A10.3a,6239.F25D7.4,6239.F29D11.2,6239.F32A5.1a,6239.F32H2.3.1,6239.F35B12.5a,6239.F41G4.2a,6239.F52B5.2,6239.F52B5.6.4,6239.F53G12.5b,6239.F55C5.4,6239.F55G1.4,6239.F56A3.3a.1,6239.F56A3.4,6239.K02B12.8b,6239.K06A5.7.1,6239.K07F5.13c,6239.K08E7.3,6239.K10B2.5,6239.T01B1…
GO Process	GO:0051301	Cell division	16	193	0.88	1.29e-06	6239.C25G4.5,6239.C29E4.2,6239.C55B7.5.2,6239.F10G7.4,6239.F15H10.3b,6239.F25B5.2.1,6239.F29D11.2,6239.F54C8.3,6239.F54C9.8,6239.F55G1.4,6239.K06A5.7.1,6239.K08E7.3,6239.K10B2.5,6239.Y39G10AR.13.1,6239.Y39G10AR.2a,6239.ZK381.4b
GO Process	GO:1903047	Mitotic cell cycle process	16	197	0.87	1.36e-06	6239.C25A1.9a,6239.C25G4.5,6239.C29E4.2,6239.F25B5.2.1,6239.F29D11.2,6239.F33G12.4.1,6239.F55C5.4,6239.F55G1.4,6239.K06A5.7.1,6239.K07F5.13c,6239.K08E7.3,6239.K10B2.5,6239.T03F1.9,6239.Y39G10AR.12a,6239.Y39G10AR.13.1,6239.Y39G10AR.2a
GO Process	GO:0016043	Cellular component organization	42	1471	0.41	6.2e-06	6239.C07H6.6,6239.C09G9.6,6239.C10C5.6c,6239.C25A1.9a,6239.C25G4.5,6239.C29E4.2,6239.C33H5.6,6239.C43E11.3a,6239.F10E9.8,6239.F10G7.4,6239.F11A10.3a,6239.F23H12.5,6239.F25D7.4,6239.F29D11.2,6239.F32A5.1a,6239.F32H2.3.1,6239.F35B12.5a,6239.F41G4.2a,6239.F52B5.2,6239.F52B5.6.4,6239.F53G12.5b,6239.F55C5.4,6239.F55G1.4,6239.F56A3.3a.1,6239.F56A3.4,6239.K02B12.8b,6239.K06A5.7.1,6239.K07F5.13c,6239.K08…
GO Process	GO:0022414	Reproductive process	26	635	0.57	6.5e-06	6239.C09G9.6,6239.C25G4.4,6239.C25G4.5,6239.C29E4.2,6239.C55B7.5.2,6239.F10G7.4,6239.F11A10.3a,6239.F15H10.3b,6239.F29D11.2,6239.F54C8.3,6239.F54C9.8,6239.H02I12.1,6239.K02B12.8b,6239.K06A5.7.1,6239.K07F5.13c,6239.K10B2.5,6239.T01B11.3,6239.T06E4.3a,6239.T23G7.1,6239.W09B6.3,6239.Y39G10AR.13.1,6239.Y39G10AR.2a,6239.Y54E10A.4b,6239.ZK1127.1.1,6239.ZK381.4b,6239.ZK546.1b
GO Process	GO:0051726	Regulation of cell cycle	16	229	0.8	6.5e-06	6239.C07H6.6,6239.C09G9.6,6239.C30B5.1,6239.C55B7.5.2,6239.F33G12.4.1,6239.F54C8.3,6239.F55G1.4,6239.F56A3.4,6239.K06A5.7.1,6239.K07F5.13c,6239.T01B11.3,6239.T03F1.9,6239.T06E4.3a,6239.T23G7.1,6239.Y39G10AR.2a,6239.ZK1127.1.1
GO Process	GO:0000003	Reproduction	27	702	0.54	1.01e-05	6239.C03B8.4,6239.C09G9.6,6239.C25G4.4,6239.C25G4.5,6239.C29E4.2,6239.C55B7.5.2,6239.F10G7.4,6239.F11A10.3a,6239.F15H10.3b,6239.F29D11.2,6239.F54C8.3,6239.F54C9.8,6239.H02I12.1,6239.K02B12.8b,6239.K06A5.7.1,6239.K07F5.13c,6239.K10B2.5,6239.T01B11.3,6239.T06E4.3a,6239.T23G7.1,6239.W09B6.3,6239.Y39G10AR.13.1,6239.Y39G10AR.2a,6239.Y54E10A.4b,6239.ZK1127.1.1,6239.ZK381.4b,6239.ZK546.1b
GO Process	GO:0045787	Positive regulation of cell cycle	10	74	1.09	1.07e-05	6239.C09G9.6,6239.C55B7.5.2,6239.F54C8.3,6239.F55G1.4,6239.F56A3.4,6239.K06A5.7.1,6239.K07F5.13c,6239.T01B11.3,6239.T23G7.1,6239.Y39G10AR.2a
GO Process	GO:0051276	Chromosome organization	18	319	0.71	1.13e-05	6239.C07H6.6,6239.C25G4.5,6239.C29E4.2,6239.C33H5.6,6239.C43E11.3a,6239.F10G7.4,6239.F11A10.3a,6239.F29D11.2,6239.F32A5.1a,6239.F55C5.4,6239.F55G1.4,6239.K02B12.8b,6239.T01E8.5,6239.T03F1.9,6239.T06E4.3a,6239.Y37E11AL.8,6239.Y39G10AR.13.1,6239.Y39G10AR.2a
GO Process	GO:0140014	Mitotic nuclear division	9	72	1.05	7.92e-05	6239.C25A1.9a,6239.C25G4.5,6239.C29E4.2,6239.F29D11.2,6239.F55C5.4,6239.F55G1.4,6239.T03F1.9,6239.Y39G10AR.12a,6239.Y39G10AR.13.1
GO Process	GO:0000280	Nuclear division	12	160	0.83	0.00012	6239.C25A1.9a,6239.C25G4.5,6239.C29E4.2,6239.F10G7.4,6239.F29D11.2,6239.F55C5.4,6239.F55G1.4,6239.K02B12.8b,6239.T03F1.9,6239.T06E4.3a,6239.Y39G10AR.12a,6239.Y39G10AR.13.1
GO Process	GO:0045931	Positive regulation of mitotic cell cycle	7	36	1.25	0.00012	6239.C55B7.5.2,6239.F54C8.3,6239.F55G1.4,6239.F56A3.4,6239.K06A5.7.1,6239.K07F5.13c,6239.Y39G10AR.2a
GO Process	GO:0007017	Microtubule-based process	14	230	0.74	0.00013	6239.C25A1.9a,6239.F10E9.8,6239.F25D7.4,6239.F32H2.3.1,6239.F35B12.5a,6239.F52B5.2,6239.F55G1.4,6239.F56A3.4,6239.K06A5.7.1,6239.K07F5.13c,6239.K08E7.3,6239.Y39G10AR.12a,6239.Y39G10AR.13.1,6239.ZK546.1b
GO Process	GO:0019953	Sexual reproduction	14	253	0.7	0.00034	6239.C09G9.6,6239.C25G4.4,6239.C55B7.5.2,6239.F54C9.8,6239.H02I12.1,6239.K07F5.13c,6239.K10B2.5,6239.T01B11.3,6239.W09B6.3,6239.Y39G10AR.13.1,6239.Y54E10A.4b,6239.ZK1127.1.1,6239.ZK381.4b,6239.ZK546.1b
GO Process	GO:0007059	Chromosome segregation	11	152	0.82	0.0004	6239.C25G4.5,6239.C29E4.2,6239.F10G7.4,6239.F29D11.2,6239.F55C5.4,6239.F55G1.4,6239.K02B12.8b,6239.T03F1.9,6239.T06E4.3a,6239.Y39G10AR.13.1,6239.ZK546.1b
GO Process	GO:0051321	Meiotic cell cycle	12	188	0.76	0.00044	6239.C09G9.6,6239.C25G4.5,6239.C29E4.2,6239.F10G7.4,6239.F15H10.3b,6239.F29D11.2,6239.F54C8.3,6239.K02B12.8b,6239.K06A5.7.1,6239.T06E4.3a,6239.Y39G10AR.13.1,6239.Y39G10AR.2a
GO Process	GO:0000226	Microtubule cytoskeleton organization	11	159	0.8	0.00054	6239.C25A1.9a,6239.F10E9.8,6239.F25D7.4,6239.F32H2.3.1,6239.F35B12.5a,6239.F56A3.4,6239.K06A5.7.1,6239.K07F5.13c,6239.K08E7.3,6239.Y39G10AR.12a,6239.ZK546.1b
GO Process	GO:0098813	Nuclear chromosome segregation	10	127	0.85	0.00054	6239.C25G4.5,6239.C29E4.2,6239.F10G7.4,6239.F29D11.2,6239.F55C5.4,6239.F55G1.4,6239.K02B12.8b,6239.T03F1.9,6239.T06E4.3a,6239.Y39G10AR.13.1
GO Process	GO:0000819	Sister chromatid segregation	8	77	0.97	0.00073	6239.C25G4.5,6239.C29E4.2,6239.F10G7.4,6239.F29D11.2,6239.F55C5.4,6239.F55G1.4,6239.T03F1.9,6239.Y39G10AR.13.1
GO Process	GO:0032502	Developmental process	37	1527	0.34	0.00073	6239.C03B8.4,6239.C07H6.6,6239.C09G9.6,6239.C10C5.6c,6239.C25A1.9a,6239.C25G4.4,6239.C55B7.5.2,6239.F10E9.8,6239.F11A10.3a,6239.F15H10.3b,6239.F23H12.5,6239.F25B5.2.1,6239.F32H2.3.1,6239.F35B12.5a,6239.F41G4.2a,6239.F43D9.4,6239.F53G12.5b,6239.F54C8.3,6239.F54C9.8,6239.F56A3.3a.1,6239.F56A3.4,6239.F59B2.6,6239.H02I12.1,6239.K02B12.8b,6239.K07F5.13c,6239.K08E7.3,6239.K10B2.5,6239.T06E4.3a,6239.T23…
GO Process	GO:1903046	Meiotic cell cycle process	10	135	0.83	0.00073	6239.C09G9.6,6239.C25G4.5,6239.C29E4.2,6239.F10G7.4,6239.F29D11.2,6239.F54C8.3,6239.K02B12.8b,6239.K06A5.7.1,6239.T06E4.3a,6239.Y39G10AR.13.1
GO Process	GO:0007276	Gamete generation	12	205	0.72	0.00075	6239.C09G9.6,6239.C25G4.4,6239.C55B7.5.2,6239.F54C9.8,6239.H02I12.1,6239.K07F5.13c,6239.K10B2.5,6239.W09B6.3,6239.Y39G10AR.13.1,6239.Y54E10A.4b,6239.ZK1127.1.1,6239.ZK381.4b
GO Process	GO:0034502	Protein localization to chromosome	5	19	1.38	0.00083	6239.C09G9.6,6239.F55G1.4,6239.F56A3.3a.1,6239.T03F1.9,6239.Y39G10AR.2a
GO Process	GO:0000070	Mitotic sister chromatid segregation	7	61	1.02	0.0014	6239.C25G4.5,6239.C29E4.2,6239.F29D11.2,6239.F55C5.4,6239.F55G1.4,6239.T03F1.9,6239.Y39G10AR.13.1
GO Process	GO:0007346	Regulation of mitotic cell cycle	9	117	0.84	0.0014	6239.C55B7.5.2,6239.F33G12.4.1,6239.F54C8.3,6239.F55G1.4,6239.F56A3.4,6239.K06A5.7.1,6239.K07F5.13c,6239.T03F1.9,6239.Y39G10AR.2a
GO Process	GO:0048856	Anatomical structure development	35	1460	0.34	0.0014	6239.C03B8.4,6239.C07H6.6,6239.C09G9.6,6239.C10C5.6c,6239.C25A1.9a,6239.C55B7.5.2,6239.F10E9.8,6239.F11A10.3a,6239.F15H10.3b,6239.F23H12.5,6239.F25B5.2.1,6239.F32H2.3.1,6239.F35B12.5a,6239.F41G4.2a,6239.F43D9.4,6239.F53G12.5b,6239.F54C8.3,6239.F54C9.8,6239.F56A3.3a.1,6239.F56A3.4,6239.F59B2.6,6239.H02I12.1,6239.K02B12.8b,6239.K07F5.13c,6239.K08E7.3,6239.K10B2.5,6239.T06E4.3a,6239.T23G7.1,6239.W03…
GO Process	GO:0007010	Cytoskeleton organization	13	276	0.63	0.0024	6239.C25A1.9a,6239.F10E9.8,6239.F25D7.4,6239.F32H2.3.1,6239.F35B12.5a,6239.F41G4.2a,6239.F56A3.4,6239.K06A5.7.1,6239.K07F5.13c,6239.K08E7.3,6239.K10B2.5,6239.Y39G10AR.12a,6239.ZK546.1b
GO Process	GO:0090068	Positive regulation of cell cycle process	6	47	1.06	0.0031	6239.C09G9.6,6239.F54C8.3,6239.F55G1.4,6239.K06A5.7.1,6239.T01B11.3,6239.Y39G10AR.2a
GO Process	GO:0051093	Negative regulation of developmental process	8	106	0.84	0.0046	6239.C03B8.4,6239.C09G9.6,6239.C43E11.3a,6239.F11A10.3a,6239.F23H12.5,6239.F53G12.5b,6239.T23G7.1,6239.Y47G6A.2.2
GO Process	GO:0007275	Multicellular organism development	32	1374	0.32	0.0056	6239.C03B8.4,6239.C07H6.6,6239.C09G9.6,6239.C10C5.6c,6239.C25A1.9a,6239.F10E9.8,6239.F11A10.3a,6239.F15H10.3b,6239.F23H12.5,6239.F25B5.2.1,6239.F32H2.3.1,6239.F35B12.5a,6239.F43D9.4,6239.F53G12.5b,6239.F54C8.3,6239.F54C9.8,6239.F56A3.3a.1,6239.F56A3.4,6239.F59B2.6,6239.H02I12.1,6239.K02B12.8b,6239.K07F5.13c,6239.K08E7.3,6239.K10B2.5,6239.T06E4.3a,6239.T23G7.1,6239.W03C9.7a.1,6239.Y39G10AR.2a,6239…
GO Process	GO:0032501	Multicellular organismal process	38	1770	0.29	0.0056	6239.C03B8.4,6239.C07H6.6,6239.C09G9.6,6239.C10C5.6c,6239.C25A1.9a,6239.C25G4.4,6239.C55B7.5.2,6239.F10E9.8,6239.F11A10.3a,6239.F15H10.3b,6239.F23H12.5,6239.F25B5.2.1,6239.F32H2.3.1,6239.F35B12.5a,6239.F43D9.4,6239.F53G12.5b,6239.F54C8.3,6239.F54C9.8,6239.F56A3.3a.1,6239.F56A3.4,6239.F59B2.6,6239.H02I12.1,6239.K02B12.8b,6239.K07F5.13c,6239.K08E7.3,6239.K10B2.5,6239.R10H1.5,6239.T06E4.3a,6239.T23G…
GO Process	GO:0045786	Negative regulation of cell cycle	7	81	0.89	0.006	6239.C07H6.6,6239.C09G9.6,6239.C55B7.5.2,6239.F33G12.4.1,6239.T03F1.9,6239.T06E4.3a,6239.Y39G10AR.2a
GO Process	GO:0010564	Regulation of cell cycle process	9	151	0.73	0.0075	6239.C09G9.6,6239.C30B5.1,6239.F33G12.4.1,6239.F54C8.3,6239.F55G1.4,6239.K06A5.7.1,6239.T01B11.3,6239.T03F1.9,6239.Y39G10AR.2a
GO Process	GO:0033365	Protein localization to organelle	10	188	0.68	0.0075	6239.C09G9.6,6239.C25A1.9a,6239.F32H2.3.1,6239.F55G1.4,6239.F56A3.3a.1,6239.F56A3.4,6239.K07F5.13c,6239.K10B2.5,6239.T03F1.9,6239.Y39G10AR.2a
GO Process	GO:0007099	Centriole replication	3	5	1.74	0.0078	6239.F10E9.8,6239.F32H2.3.1,6239.F35B12.5a
GO Process	GO:0070192	Chromosome organization involved in meiotic cell cycle	5	36	1.1	0.0086	6239.C25G4.5,6239.C29E4.2,6239.F10G7.4,6239.F29D11.2,6239.K02B12.8b
GO Process	GO:0009790	Embryo development	15	425	0.51	0.0101	6239.C25A1.9a,6239.F25B5.2.1,6239.F32H2.3.1,6239.F43D9.4,6239.F53G12.5b,6239.F54C8.3,6239.F56A3.3a.1,6239.F59B2.6,6239.K02B12.8b,6239.K07F5.13c,6239.K10B2.5,6239.T06E4.3a,6239.W03C9.7a.1,6239.ZK381.4b,6239.ZK546.1b
GO Process	GO:0007292	Female gamete generation	8	124	0.77	0.0102	6239.C09G9.6,6239.F54C9.8,6239.H02I12.1,6239.K07F5.13c,6239.K10B2.5,6239.Y39G10AR.13.1,6239.ZK1127.1.1,6239.ZK381.4b
GO Process	GO:2001252	Positive regulation of chromosome organization	4	19	1.28	0.0104	6239.F32A5.1a,6239.F54C8.3,6239.F55G1.4,6239.Y39G10AR.2a
GO Process	GO:0022412	Cellular process involved in reproduction in multicellular organism	9	170	0.68	0.0151	6239.C09G9.6,6239.C55B7.5.2,6239.F54C9.8,6239.H02I12.1,6239.K07F5.13c,6239.K10B2.5,6239.Y39G10AR.13.1,6239.ZK1127.1.1,6239.ZK381.4b
GO Process	GO:0048477	Oogenesis	7	99	0.81	0.0155	6239.C09G9.6,6239.F54C9.8,6239.H02I12.1,6239.K07F5.13c,6239.K10B2.5,6239.ZK1127.1.1,6239.ZK381.4b
GO Process	GO:0051303	Establishment of chromosome localization	4	22	1.22	0.0161	6239.C09G9.6,6239.F55G1.4,6239.T03F1.9,6239.Y39G10AR.13.1
GO Process	GO:0051241	Negative regulation of multicellular organismal process	7	102	0.79	0.0177	6239.C03B8.4,6239.C09G9.6,6239.C43E11.3a,6239.F11A10.3a,6239.F23H12.5,6239.T23G7.1,6239.Y47G6A.2.2
GO Process	GO:0009880	Embryonic pattern specification	5	45	1	0.019	6239.F25B5.2.1,6239.F53G12.5b,6239.F54C8.3,6239.W03C9.7a.1,6239.ZK381.4b
GO Process	GO:0000075	Cell cycle checkpoint	5	47	0.98	0.022	6239.C07H6.6,6239.C55B7.5.2,6239.F33G12.4.1,6239.T06E4.3a,6239.Y39G10AR.2a
GO Process	GO:0003006	Developmental process involved in reproduction	13	368	0.51	0.0237	6239.C09G9.6,6239.C25G4.4,6239.C55B7.5.2,6239.F11A10.3a,6239.F54C9.8,6239.H02I12.1,6239.K07F5.13c,6239.K10B2.5,6239.T23G7.1,6239.W09B6.3,6239.Y54E10A.4b,6239.ZK1127.1.1,6239.ZK381.4b
GO Process	GO:0007098	Centrosome cycle	4	26	1.14	0.0246	6239.F10E9.8,6239.F32H2.3.1,6239.F35B12.5a,6239.F56A3.4
GO Process	GO:0070647	Protein modification by small protein conjugation or removal	10	230	0.6	0.0246	6239.C17E4.3,6239.F11A10.3a,6239.F15H10.3b,6239.F54C8.3,6239.F59B2.6,6239.K02B12.8b,6239.K04C2.4.1,6239.T24B8.7a,6239.T27A3.7,6239.Y54E10A.11
GO Process	GO:0070925	Organelle assembly	10	229	0.6	0.0246	6239.C25A1.9a,6239.F10E9.8,6239.F32H2.3.1,6239.F35B12.5a,6239.F52B5.2,6239.F52B5.6.4,6239.F55G1.4,6239.T03F1.9,6239.Y39G10AR.12a,6239.Y39G10AR.2a
GO Process	GO:0007281	Germ cell development	8	148	0.69	0.0247	6239.C09G9.6,6239.C55B7.5.2,6239.F54C9.8,6239.H02I12.1,6239.K07F5.13c,6239.K10B2.5,6239.ZK1127.1.1,6239.ZK381.4b
GO Process	GO:0032446	Protein modification by small protein conjugation	9	188	0.64	0.0247	6239.C17E4.3,6239.F11A10.3a,6239.F15H10.3b,6239.F54C8.3,6239.F59B2.6,6239.K02B12.8b,6239.K04C2.4.1,6239.T27A3.7,6239.Y54E10A.11
GO Process	GO:0009792	Embryo development ending in birth or egg hatching	11	287	0.54	0.0316	6239.C25A1.9a,6239.F32H2.3.1,6239.F43D9.4,6239.F56A3.3a.1,6239.F59B2.6,6239.K02B12.8b,6239.K07F5.13c,6239.K10B2.5,6239.T06E4.3a,6239.W03C9.7a.1,6239.ZK546.1b
GO Process	GO:0034501	Protein localization to kinetochore	3	11	1.39	0.0316	6239.F55G1.4,6239.F56A3.3a.1,6239.Y39G10AR.2a
GO Process	GO:0040027	Negative regulation of vulval development	4	29	1.1	0.0316	6239.C03B8.4,6239.C43E11.3a,6239.F11A10.3a,6239.T23G7.1
GO Process	GO:0040019	Positive regulation of embryonic development	4	32	1.05	0.0423	6239.C09G9.6,6239.F54C9.8,6239.F56A3.4,6239.K07F5.13c
GO Process	GO:0051148	Negative regulation of muscle cell differentiation	2	2	1.96	0.0476	6239.C09G9.6,6239.F53G12.5b
GO Function	GO:0005515	Protein binding	48	1957	0.35	9.32e-05	6239.B0464.8,6239.C04D8.1c,6239.C05C10.5a,6239.C09G9.6,6239.C25A1.9a,6239.C25G4.4,6239.C29E4.2,6239.C30B5.1,6239.C39D10.7.1,6239.F23H12.5,6239.F25D7.4,6239.F32H2.3.1,6239.F33G12.4.1,6239.F35B12.5a,6239.F41G4.2a,6239.F43D9.4,6239.F53G12.5b,6239.F54C8.3,6239.F54D5.9,6239.F55C5.4,6239.F55G1.4,6239.F56A3.4,6239.F59B2.6,6239.K04C2.4.1,6239.K06A5.7.1,6239.K07F5.13c,6239.K08E3.4,6239.K08E7.3,6239.K10B2.…
GO Function	GO:0005488	Binding	81	4888	0.18	0.0068	6239.B0464.8,6239.C03B8.4,6239.C04D8.1c,6239.C05C10.5a,6239.C07H6.6,6239.C09G9.6,6239.C17E4.3,6239.C25A1.9a,6239.C25G4.4,6239.C29E4.2,6239.C30B5.1,6239.C33H5.6,6239.C34B2.7.1,6239.C39D10.7.1,6239.C41G7.3,6239.C44E4.3,6239.C50C3.1,6239.C55B7.5.2,6239.D1037.1,6239.F10G7.4,6239.F11A10.3a,6239.F23H12.5,6239.F25D7.4,6239.F32A5.1a,6239.F32H2.3.1,6239.F33A8.3,6239.F33G12.4.1,6239.F35B12.5a,6239.F41G4.2a…
GO Component	GO:0043232	Intracellular non-membrane-bounded organelle	38	1200	0.46	3.08e-06	6239.C07H6.6,6239.C09G9.6,6239.C25A1.9a,6239.C25G4.4,6239.C25G4.5,6239.C29E4.2,6239.C43E11.3a,6239.F10E9.8,6239.F10G7.4,6239.F11A10.3a,6239.F25D7.4,6239.F29D11.2,6239.F32H2.3.1,6239.F35B12.5a,6239.F41G4.2a,6239.F52B5.6.4,6239.F53G12.5b,6239.F54C9.8,6239.F55G1.4,6239.F56A3.4,6239.H21P03.2.1,6239.K02B12.8b,6239.K04C2.4.1,6239.K10B2.5,6239.T03F1.9,6239.T06E4.3a,6239.T09A5.12.2,6239.T27A3.7,6239.W03C…
GO Component	GO:0000793	Condensed chromosome	11	126	0.9	9.39e-05	6239.C25G4.5,6239.C29E4.2,6239.F10G7.4,6239.F29D11.2,6239.F55G1.4,6239.H21P03.2.1,6239.K02B12.8b,6239.T03F1.9,6239.T06E4.3a,6239.T27A3.7,6239.Y39G10AR.2a
GO Component	GO:0005694	Chromosome	17	338	0.66	9.39e-05	6239.C07H6.6,6239.C25G4.4,6239.C25G4.5,6239.C29E4.2,6239.C43E11.3a,6239.F10G7.4,6239.F29D11.2,6239.F55G1.4,6239.H21P03.2.1,6239.K02B12.8b,6239.K04C2.4.1,6239.T03F1.9,6239.T06E4.3a,6239.T09A5.12.2,6239.T27A3.7,6239.Y39G10AR.13.1,6239.Y39G10AR.2a
GO Component	GO:0043186	P granule	7	58	1.04	0.0012	6239.C09G9.6,6239.F53G12.5b,6239.F54C9.8,6239.W03C9.7a.1,6239.Y65B4BL.2,6239.ZC404.8.1,6239.ZK381.4b
GO Component	GO:0043229	Intracellular organelle	72	4174	0.19	0.0012	6239.C03B8.4,6239.C07H6.6,6239.C09G9.6,6239.C25A1.9a,6239.C25G4.4,6239.C25G4.5,6239.C29E4.2,6239.C33H5.6,6239.C34B2.7.1,6239.C43E11.3a,6239.C44E4.3,6239.F01F1.11,6239.F10E9.8,6239.F10G7.4,6239.F11A10.3a,6239.F15H10.3b,6239.F18A1.8,6239.F25B5.2.1,6239.F25D7.4,6239.F29D11.2,6239.F32A5.1a,6239.F32H2.3.1,6239.F33A8.3,6239.F33G12.4.1,6239.F35B12.5a,6239.F35G12.10.1,6239.F41G4.2a,6239.F52B5.2,6239.F52B…
GO Component	GO:0005634	Nucleus	45	2149	0.28	0.0013	6239.C03B8.4,6239.C07H6.6,6239.C09G9.6,6239.C25G4.4,6239.C25G4.5,6239.C29E4.2,6239.C33H5.6,6239.C43E11.3a,6239.F10G7.4,6239.F11A10.3a,6239.F15H10.3b,6239.F18A1.8,6239.F25B5.2.1,6239.F29D11.2,6239.F32A5.1a,6239.F33G12.4.1,6239.F52B5.2,6239.F53F4.14.2,6239.F54C8.3,6239.F55C5.4,6239.F56A3.3a.1,6239.H21P03.2.1,6239.K02B12.8b,6239.K04C2.4.1,6239.K06A5.7.1,6239.K07F5.13c,6239.R04F11.3,6239.R119.7,6239.…
GO Component	GO:0005622	Intracellular	81	5021	0.17	0.0023	6239.C03B8.4,6239.C04D8.1c,6239.C07H6.6,6239.C09G9.6,6239.C10C5.6c,6239.C25A1.9a,6239.C25G4.4,6239.C25G4.5,6239.C29E4.2,6239.C33H5.6,6239.C34B2.7.1,6239.C43E11.3a,6239.C44E4.3,6239.F01F1.11,6239.F10E9.8,6239.F10G7.4,6239.F11A10.3a,6239.F15H10.3b,6239.F18A1.8,6239.F25B5.2.1,6239.F25D7.4,6239.F29D11.2,6239.F32A5.1a,6239.F32H2.3.1,6239.F33A8.3,6239.F33G12.4.1,6239.F35B12.5a,6239.F35G12.10.1,6239.F35…
GO Component	GO:0000152	Nuclear ubiquitin ligase complex	4	14	1.41	0.0029	6239.F11A10.3a,6239.F15H10.3b,6239.F54C8.3,6239.K04C2.4.1
GO Component	GO:0015630	Microtubule cytoskeleton	11	217	0.66	0.003	6239.C09G9.6,6239.C25A1.9a,6239.F10E9.8,6239.F25D7.4,6239.F32H2.3.1,6239.F35B12.5a,6239.F55G1.4,6239.F56A3.4,6239.Y39G10AR.12a,6239.Y39G10AR.2a,6239.ZK546.1b
GO Component	GO:0005815	Microtubule organizing center	8	121	0.78	0.0057	6239.C09G9.6,6239.C25A1.9a,6239.F10E9.8,6239.F32H2.3.1,6239.F35B12.5a,6239.F56A3.4,6239.Y39G10AR.12a,6239.ZK546.1b
GO Component	GO:0005813	Centrosome	6	67	0.91	0.0079	6239.C09G9.6,6239.C25A1.9a,6239.F32H2.3.1,6239.F56A3.4,6239.Y39G10AR.12a,6239.ZK546.1b
GO Component	GO:0099080	Supramolecular complex	14	400	0.5	0.0093	6239.C09G9.6,6239.F25D7.4,6239.F53G12.5b,6239.F54C9.8,6239.F55G1.4,6239.W03C9.2,6239.W03C9.7a.1,6239.Y39G10AR.12a,6239.Y39G10AR.13.1,6239.Y39G10AR.2a,6239.Y65B4BL.2,6239.ZC404.8.1,6239.ZK381.4b,6239.ZK546.1b
GO Component	GO:0032991	Protein-containing complex	38	1921	0.25	0.0118	6239.C07H6.6,6239.C09G9.6,6239.C10C5.6c,6239.C25G4.5,6239.C29E4.2,6239.C33H5.6,6239.C34B2.7.1,6239.F10G7.4,6239.F11A10.3a,6239.F15H10.3b,6239.F26B1.4,6239.F29D11.2,6239.F32A5.1a,6239.F33G12.4.1,6239.F35G12.10.1,6239.F52B5.6.4,6239.F52E1.10,6239.F54C8.3,6239.F55G1.4,6239.F56A3.3a.1,6239.F56D12.5a.1,6239.H21P03.2.1,6239.K04C2.4.1,6239.K07F5.13c,6239.R119.7,6239.T01B11.3,6239.T09A5.12.2,6239.T22D1.5…
GO Component	GO:0005856	Cytoskeleton	13	384	0.49	0.0195	6239.C09G9.6,6239.C25A1.9a,6239.F10E9.8,6239.F25D7.4,6239.F32H2.3.1,6239.F35B12.5a,6239.F41G4.2a,6239.F55G1.4,6239.F56A3.4,6239.K10B2.5,6239.Y39G10AR.12a,6239.Y39G10AR.2a,6239.ZK546.1b
GO Component	GO:0098687	Chromosomal region	6	88	0.79	0.0254	6239.C07H6.6,6239.C29E4.2,6239.F55G1.4,6239.T03F1.9,6239.Y39G10AR.13.1,6239.Y39G10AR.2a
GO Component	GO:1990234	Transferase complex	11	311	0.51	0.035	6239.C33H5.6,6239.F11A10.3a,6239.F15H10.3b,6239.F32A5.1a,6239.F33G12.4.1,6239.F54C8.3,6239.H21P03.2.1,6239.K04C2.4.1,6239.T27A3.7,6239.Y37E11AL.8,6239.Y47D3A.15
GO Component	GO:0031981	Nuclear lumen	15	527	0.41	0.0357	6239.C07H6.6,6239.C25G4.5,6239.C33H5.6,6239.F10G7.4,6239.F11A10.3a,6239.F32A5.1a,6239.F54C8.3,6239.K02B12.8b,6239.T03F1.9,6239.T06E4.3a,6239.T09A5.12.2,6239.T16H12.11.1,6239.Y37E11AL.8,6239.Y54E10A.4b,6239.ZK863.4.1
GO Component	GO:0000775	Chromosome, centromeric region	5	65	0.84	0.039	6239.C29E4.2,6239.F55G1.4,6239.T03F1.9,6239.Y39G10AR.13.1,6239.Y39G10AR.2a
GO Component	GO:0005814	Centriole	3	16	1.23	0.0409	6239.F10E9.8,6239.F32H2.3.1,6239.F35B12.5a
GO Component	GO:1990423	RZZ complex	2	3	1.78	0.042	6239.F55G1.4,6239.Y39G10AR.2a
STRING clusters	6239_CL:3467	Mixed, incl. oogenesis, and p granule	39	156	1.36	3.25e-35	6239.B0304.2,6239.C01G8.1a,6239.C05C10.5a,6239.C05D2.5,6239.C09G9.6,6239.C10F3.1,6239.C14B1.2,6239.C17E4.3,6239.C30B5.1,6239.C37C3.9,6239.C50C3.1,6239.D2005.4.2,6239.F15H10.3b,6239.F43D9.4,6239.F45F2.11b,6239.F53G12.5b,6239.F54C9.8,6239.F54D5.9,6239.F56C9.3,6239.F59B2.6,6239.H02I12.1,6239.K01C8.5,6239.K02B12.8b,6239.K08E7.3,6239.K10B2.5,6239.R06C7.4.1,6239.T01H3.4,6239.T07C4.3a.1,6239.T13F2.6,623…
STRING clusters	6239_CL:3463	Mostly uncharacterized, incl. oogenesis, and condensed nuclear chromosome	41	191	1.29	3.34e-35	6239.B0304.2,6239.C01G8.1a,6239.C05C10.5a,6239.C05D2.5,6239.C09G9.6,6239.C10F3.1,6239.C14B1.2,6239.C17E4.3,6239.C30B5.1,6239.C37C3.9,6239.C50C3.1,6239.D2005.4.2,6239.F15H10.3b,6239.F43D9.4,6239.F45F2.11b,6239.F53G12.5b,6239.F54C9.8,6239.F54D5.9,6239.F56C9.3,6239.F59B2.6,6239.H02I12.1,6239.K01C8.5,6239.K02B12.8b,6239.K08E7.3,6239.K10B2.5,6239.R06C7.4.1,6239.T01H3.4,6239.T07C4.3a.1,6239.T13F2.6,623…
STRING clusters	6239_CL:3468	Mixed, incl. oogenesis, and p granule	36	147	1.35	1.28e-32	6239.B0304.2,6239.C01G8.1a,6239.C05C10.5a,6239.C05D2.5,6239.C09G9.6,6239.C10F3.1,6239.C14B1.2,6239.C17E4.3,6239.C30B5.1,6239.C37C3.9,6239.C50C3.1,6239.F43D9.4,6239.F45F2.11b,6239.F53G12.5b,6239.F54C9.8,6239.F54D5.9,6239.F56C9.3,6239.F59B2.6,6239.H02I12.1,6239.K01C8.5,6239.K08E7.3,6239.K10B2.5,6239.R06C7.4.1,6239.T01H3.4,6239.T07C4.3a.1,6239.T13F2.6,6239.T21C9.13,6239.T22D1.5,6239.T23D8.7,6239.W03…
STRING clusters	6239_CL:3470	Mixed, incl. oogenesis, and p granule	34	138	1.35	8.54e-31	6239.B0304.2,6239.C01G8.1a,6239.C05C10.5a,6239.C05D2.5,6239.C09G9.6,6239.C10F3.1,6239.C14B1.2,6239.C17E4.3,6239.C30B5.1,6239.C37C3.9,6239.C50C3.1,6239.F43D9.4,6239.F53G12.5b,6239.F54C9.8,6239.F54D5.9,6239.F56C9.3,6239.F59B2.6,6239.H02I12.1,6239.K01C8.5,6239.K08E7.3,6239.K10B2.5,6239.R06C7.4.1,6239.T01H3.4,6239.T07C4.3a.1,6239.T13F2.6,6239.T21C9.13,6239.T22D1.5,6239.T23D8.7,6239.W03C9.2,6239.W03C9…
STRING clusters	6239_CL:3472	Mixed, incl. oogenesis, and p granule	33	131	1.36	3.8e-30	6239.C01G8.1a,6239.C05C10.5a,6239.C05D2.5,6239.C09G9.6,6239.C10F3.1,6239.C14B1.2,6239.C17E4.3,6239.C30B5.1,6239.C37C3.9,6239.C50C3.1,6239.F43D9.4,6239.F53G12.5b,6239.F54C9.8,6239.F54D5.9,6239.F56C9.3,6239.F59B2.6,6239.H02I12.1,6239.K01C8.5,6239.K08E7.3,6239.K10B2.5,6239.R06C7.4.1,6239.T01H3.4,6239.T07C4.3a.1,6239.T13F2.6,6239.T21C9.13,6239.T22D1.5,6239.T23D8.7,6239.W03C9.2,6239.W03C9.7a.1,6239.W0…
STRING clusters	6239_CL:3473	Mixed, incl. oogenesis, and p granule	28	115	1.34	6.5e-25	6239.C01G8.1a,6239.C05C10.5a,6239.C09G9.6,6239.C10F3.1,6239.C14B1.2,6239.C17E4.3,6239.C30B5.1,6239.C37C3.9,6239.C50C3.1,6239.F43D9.4,6239.F53G12.5b,6239.F54C9.8,6239.F56C9.3,6239.F59B2.6,6239.H02I12.1,6239.K01C8.5,6239.K08E7.3,6239.R06C7.4.1,6239.T01H3.4,6239.T13F2.6,6239.T21C9.13,6239.T22D1.5,6239.T23D8.7,6239.W03C9.2,6239.W03C9.7a.1,6239.W05F2.3,6239.ZC404.8.1,6239.ZK1127.1.1
STRING clusters	6239_CL:3474	Mixed, incl. oogenesis, and p granule	25	109	1.32	1.61e-21	6239.C01G8.1a,6239.C05C10.5a,6239.C09G9.6,6239.C10F3.1,6239.C14B1.2,6239.C17E4.3,6239.C30B5.1,6239.C37C3.9,6239.C50C3.1,6239.F43D9.4,6239.F54C9.8,6239.F56C9.3,6239.H02I12.1,6239.K01C8.5,6239.K08E7.3,6239.R06C7.4.1,6239.T01H3.4,6239.T13F2.6,6239.T21C9.13,6239.T22D1.5,6239.T23D8.7,6239.W03C9.2,6239.W05F2.3,6239.ZC404.8.1,6239.ZK1127.1.1
STRING clusters	6239_CL:3476	Mixed, incl. oogenesis, and p granule	21	99	1.28	3.18e-17	6239.C01G8.1a,6239.C05C10.5a,6239.C09G9.6,6239.C10F3.1,6239.C14B1.2,6239.C17E4.3,6239.C37C3.9,6239.F43D9.4,6239.F54C9.8,6239.F56C9.3,6239.H02I12.1,6239.K08E7.3,6239.R06C7.4.1,6239.T01H3.4,6239.T21C9.13,6239.T22D1.5,6239.T23D8.7,6239.W03C9.2,6239.W05F2.3,6239.ZC404.8.1,6239.ZK1127.1.1
STRING clusters	6239_CL:3481	Mixed, incl. oogenesis, and p granule	20	84	1.33	3.18e-17	6239.C01G8.1a,6239.C05C10.5a,6239.C09G9.6,6239.C10F3.1,6239.C14B1.2,6239.C17E4.3,6239.C37C3.9,6239.F43D9.4,6239.F54C9.8,6239.F56C9.3,6239.H02I12.1,6239.K08E7.3,6239.R06C7.4.1,6239.T01H3.4,6239.T21C9.13,6239.T22D1.5,6239.T23D8.7,6239.W05F2.3,6239.ZC404.8.1,6239.ZK1127.1.1
STRING clusters	6239_CL:3482	Mixed, incl. oogenesis, and p granule	19	74	1.37	7.37e-17	6239.C01G8.1a,6239.C05C10.5a,6239.C09G9.6,6239.C10F3.1,6239.C14B1.2,6239.C17E4.3,6239.C37C3.9,6239.F43D9.4,6239.F54C9.8,6239.F56C9.3,6239.H02I12.1,6239.K08E7.3,6239.R06C7.4.1,6239.T21C9.13,6239.T22D1.5,6239.T23D8.7,6239.W05F2.3,6239.ZC404.8.1,6239.ZK1127.1.1
STRING clusters	6239_CL:3483	Mixed, incl. oogenesis, and proteoglycan	18	68	1.38	3.65e-16	6239.C01G8.1a,6239.C05C10.5a,6239.C09G9.6,6239.C10F3.1,6239.C14B1.2,6239.C17E4.3,6239.C37C3.9,6239.F43D9.4,6239.F54C9.8,6239.H02I12.1,6239.K08E7.3,6239.R06C7.4.1,6239.T21C9.13,6239.T22D1.5,6239.T23D8.7,6239.W05F2.3,6239.ZC404.8.1,6239.ZK1127.1.1
STRING clusters	6239_CL:3485	Mixed, incl. eggshell formation, and mrna 3-utr binding	16	56	1.41	1.07e-14	6239.C01G8.1a,6239.C05C10.5a,6239.C09G9.6,6239.C10F3.1,6239.C14B1.2,6239.C17E4.3,6239.C37C3.9,6239.F43D9.4,6239.F54C9.8,6239.H02I12.1,6239.R06C7.4.1,6239.T21C9.13,6239.T22D1.5,6239.W05F2.3,6239.ZC404.8.1,6239.ZK1127.1.1
STRING clusters	6239_CL:3486	Mixed, incl. oogenesis, and rna destabilization	14	50	1.4	1.17e-12	6239.C01G8.1a,6239.C05C10.5a,6239.C09G9.6,6239.C14B1.2,6239.C17E4.3,6239.C37C3.9,6239.F43D9.4,6239.F54C9.8,6239.H02I12.1,6239.T21C9.13,6239.T22D1.5,6239.W05F2.3,6239.ZC404.8.1,6239.ZK1127.1.1
STRING clusters	6239_CL:3488	Mixed, incl. eggshell formation, and mrna 3-utr binding	13	43	1.44	4.66e-12	6239.C01G8.1a,6239.C05C10.5a,6239.C09G9.6,6239.C14B1.2,6239.C17E4.3,6239.C37C3.9,6239.F54C9.8,6239.H02I12.1,6239.T21C9.13,6239.T22D1.5,6239.W05F2.3,6239.ZC404.8.1,6239.ZK1127.1.1
STRING clusters	6239_CL:2410	Mixed, incl. centriole assembly, and spindle pole centrosome	7	12	1.72	1.35e-07	6239.C25A1.9a,6239.F10E9.8,6239.F32H2.3.1,6239.F35B12.5a,6239.F56A3.4,6239.T07C4.10,6239.Y39G10AR.12a
STRING clusters	6239_CL:3540	Mixed, incl. positive regulation of protein localization to cell cortex, and pumilio homology domain	7	18	1.55	1.1e-06	6239.C01G8.1a,6239.C05C10.5a,6239.C09G9.6,6239.F54C9.8,6239.H02I12.1,6239.W05F2.3,6239.ZC404.8.1
STRING clusters	6239_CL:2133	Mixed, incl. aaa domain, and dna condensation	7	27	1.37	1.08e-05	6239.C25G4.5,6239.C29E4.2,6239.F10G7.4,6239.F29D11.2,6239.F55C5.4,6239.H21P03.2.1,6239.T27A3.7
STRING clusters	6239_CL:3489	Mostly uncharacterized, incl. cyclin, c-terminal domain, and male pronucleus	6	25	1.34	0.00014	6239.C14B1.2,6239.C17E4.3,6239.C37C3.9,6239.T21C9.13,6239.T22D1.5,6239.ZK1127.1.1
STRING clusters	6239_CL:2192	Mixed, incl. mitosis, and regulation of mitotic nuclear division	9	89	0.96	0.00018	6239.F25B5.2.1,6239.F54C8.3,6239.F55G1.4,6239.K02B12.5,6239.K06A5.7.1,6239.T03F1.9,6239.T23G7.1,6239.Y39G10AR.13.1,6239.Y39G10AR.2a
STRING clusters	6239_CL:3542	Mixed, incl. positive regulation of protein localization to cell cortex, and pumilio homology domain	5	14	1.51	0.00021	6239.C01G8.1a,6239.C05C10.5a,6239.F54C9.8,6239.H02I12.1,6239.W05F2.3
STRING clusters	6239_CL:3714	Mostly uncharacterized, incl. negative regulation of rna catabolic process, and ost-hth/lotus domain	5	16	1.45	0.00035	6239.C05D2.5,6239.F54D5.9,6239.K10B2.5,6239.T07C4.3a.1,6239.Y65B4BL.2
STRING clusters	6239_CL:1861	DNA metabolic process, and mitotic sister chromatid segregation	10	160	0.75	0.0022	6239.C25G4.5,6239.C29E4.2,6239.F10G7.4,6239.F29D11.2,6239.F55C5.4,6239.F59A3.6,6239.H21P03.2.1,6239.K04C2.4.1,6239.T06E4.3a,6239.T27A3.7
STRING clusters	6239_CL:2413	Centriole assembly	3	5	1.74	0.0086	6239.F10E9.8,6239.F32H2.3.1,6239.F35B12.5a
STRING clusters	6239_CL:2424	Spindle pole centrosome, and protein phosphatase 2a binding	3	5	1.74	0.0086	6239.C25A1.9a,6239.F56A3.4,6239.Y39G10AR.12a
STRING clusters	6239_CL:3490	Mostly uncharacterized, incl. cyclin, c-terminal domain, and male pronucleus	4	18	1.3	0.0101	6239.C14B1.2,6239.C17E4.3,6239.C37C3.9,6239.T22D1.5
STRING clusters	6239_CL:3703	Mixed, incl. organelle inheritance, and pumilio, rna binding domain	3	6	1.66	0.0116	6239.F53G12.5b,6239.F59B2.6,6239.W03C9.7a.1
STRING clusters	6239_CL:3775	Mixed, incl. c-rich strand telomeric dna binding, and synaptonemal complex disassembly	3	6	1.66	0.0116	6239.D2005.4.2,6239.F15H10.3b,6239.K02B12.8b
STRING clusters	6239_CL:3543	Positive regulation of protein localization to cell cortex, and pumilio homology domain	3	9	1.48	0.0279	6239.F54C9.8,6239.H02I12.1,6239.W05F2.3
STRING clusters	6239_CL:2194	Mixed, incl. condensed chromosome, centromeric region, and mitotic cytokinesis	5	50	0.96	0.0337	6239.F25B5.2.1,6239.F55G1.4,6239.T03F1.9,6239.Y39G10AR.13.1,6239.Y39G10AR.2a
STRING clusters	6239_CL:7033	Mixed, incl. negative regulation of cytoplasmic translation, and polynucleotide adenylyltransferase activity	3	11	1.39	0.0428	6239.R119.7,6239.T22A3.3a,6239.Y54E10A.4b
WikiPathways	WP1411	Cell division: first embryonic mitosis	12	110	1	4.92e-07	6239.C29E4.2,6239.F10E9.8,6239.F10G7.4,6239.F32H2.3.1,6239.F35B12.5a,6239.F55C5.4,6239.F55G1.4,6239.F56A3.4,6239.K08E7.3,6239.T03F1.9,6239.Y39G10AR.13.1,6239.ZK546.1b
COMPARTMENTS	GOCC:0043228	Non-membrane-bounded organelle	33	850	0.55	3.63e-07	6239.C07H6.6,6239.C09G9.6,6239.C25A1.9a,6239.C25G4.4,6239.C25G4.5,6239.C29E4.2,6239.F10E9.8,6239.F10G7.4,6239.F11A10.3a,6239.F29D11.2,6239.F32H2.3.1,6239.F35B12.5a,6239.F53G12.5b,6239.F54C9.8,6239.F55C5.4,6239.F55G1.4,6239.F56A3.4,6239.H21P03.2.1,6239.K02B12.8b,6239.K10B2.5,6239.T03F1.9,6239.T06E4.3a,6239.T27A3.7,6239.W03C9.2,6239.W03C9.7a.1,6239.Y39G10AR.12a,6239.Y39G10AR.13.1,6239.Y39G10AR.2a,6…
COMPARTMENTS	GOCC:0043232	Intracellular non-membrane-bounded organelle	33	847	0.55	3.63e-07	6239.C07H6.6,6239.C09G9.6,6239.C25A1.9a,6239.C25G4.4,6239.C25G4.5,6239.C29E4.2,6239.F10E9.8,6239.F10G7.4,6239.F11A10.3a,6239.F29D11.2,6239.F32H2.3.1,6239.F35B12.5a,6239.F53G12.5b,6239.F54C9.8,6239.F55C5.4,6239.F55G1.4,6239.F56A3.4,6239.H21P03.2.1,6239.K02B12.8b,6239.K10B2.5,6239.T03F1.9,6239.T06E4.3a,6239.T27A3.7,6239.W03C9.2,6239.W03C9.7a.1,6239.Y39G10AR.12a,6239.Y39G10AR.13.1,6239.Y39G10AR.2a,6…
COMPARTMENTS	GOCC:0043229	Intracellular organelle	58	2360	0.35	3.8e-07	6239.C03B8.4,6239.C07H6.6,6239.C09G9.6,6239.C25A1.9a,6239.C25G4.4,6239.C25G4.5,6239.C29E4.2,6239.C33H5.6,6239.C34B2.7.1,6239.C44E4.3,6239.F10E9.8,6239.F10G7.4,6239.F11A10.3a,6239.F15H10.3b,6239.F18A1.8,6239.F25B5.2.1,6239.F29D11.2,6239.F32A5.1a,6239.F32H2.3.1,6239.F33G12.4.1,6239.F35B12.5a,6239.F35G12.10.1,6239.F41G4.2a,6239.F52E1.10,6239.F53G12.5b,6239.F54C8.3,6239.F54C9.8,6239.F55C5.4,6239.F55G…
COMPARTMENTS	GOCC:0005622	Intracellular	65	2946	0.3	1.32e-06	6239.C03B8.4,6239.C07H6.6,6239.C09G9.6,6239.C10C5.6c,6239.C25A1.9a,6239.C25G4.4,6239.C25G4.5,6239.C29E4.2,6239.C33H5.6,6239.C34B2.7.1,6239.C44E4.3,6239.F10E9.8,6239.F10G7.4,6239.F11A10.3a,6239.F15H10.3b,6239.F18A1.8,6239.F25B5.2.1,6239.F29D11.2,6239.F32A5.1a,6239.F32H2.3.1,6239.F33A8.3,6239.F33G12.4.1,6239.F35B12.5a,6239.F35G12.10.1,6239.F41G4.2a,6239.F43D9.4,6239.F52E1.10,6239.F53G12.5b,6239.F54…
COMPARTMENTS	GOCC:0043226	Organelle	58	2466	0.33	1.32e-06	6239.C03B8.4,6239.C07H6.6,6239.C09G9.6,6239.C25A1.9a,6239.C25G4.4,6239.C25G4.5,6239.C29E4.2,6239.C33H5.6,6239.C34B2.7.1,6239.C44E4.3,6239.F10E9.8,6239.F10G7.4,6239.F11A10.3a,6239.F15H10.3b,6239.F18A1.8,6239.F25B5.2.1,6239.F29D11.2,6239.F32A5.1a,6239.F32H2.3.1,6239.F33G12.4.1,6239.F35B12.5a,6239.F35G12.10.1,6239.F41G4.2a,6239.F52E1.10,6239.F53G12.5b,6239.F54C8.3,6239.F54C9.8,6239.F55C5.4,6239.F55G…
COMPARTMENTS	GOCC:0000793	Condensed chromosome	11	113	0.95	2.11e-05	6239.C25G4.5,6239.C29E4.2,6239.F10G7.4,6239.F29D11.2,6239.F55C5.4,6239.H21P03.2.1,6239.K02B12.8b,6239.T03F1.9,6239.T06E4.3a,6239.T27A3.7,6239.ZK546.1b
COMPARTMENTS	GOCC:0005694	Chromosome	16	275	0.72	2.11e-05	6239.C07H6.6,6239.C25G4.4,6239.C25G4.5,6239.C29E4.2,6239.F10G7.4,6239.F29D11.2,6239.F55C5.4,6239.F55G1.4,6239.H21P03.2.1,6239.K02B12.8b,6239.T03F1.9,6239.T06E4.3a,6239.T27A3.7,6239.Y39G10AR.13.1,6239.Y39G10AR.2a,6239.ZK546.1b
COMPARTMENTS	GOCC:0110165	Cellular anatomical entity	67	3585	0.23	0.00024	6239.C03B8.4,6239.C04D8.1c,6239.C07H6.6,6239.C09G9.6,6239.C25A1.9a,6239.C25G4.4,6239.C25G4.5,6239.C29E4.2,6239.C33H5.6,6239.C34B2.7.1,6239.C44E4.3,6239.F10E9.8,6239.F10G7.4,6239.F11A10.3a,6239.F15H10.3b,6239.F16H11.3,6239.F18A1.8,6239.F25B5.2.1,6239.F29D11.2,6239.F32A5.1a,6239.F32H2.3.1,6239.F33G12.4.1,6239.F35B12.5a,6239.F35G12.10.1,6239.F41G4.2a,6239.F43D9.4,6239.F52E1.10,6239.F53G12.5b,6239.F5…
COMPARTMENTS	GOCC:0032991	Protein-containing complex	40	1720	0.32	0.00051	6239.C07H6.6,6239.C09G9.6,6239.C10C5.6c,6239.C25G4.5,6239.C29E4.2,6239.C33H5.6,6239.C34B2.7.1,6239.C44E4.3,6239.D1037.1,6239.F10G7.4,6239.F11A10.3a,6239.F15H10.3b,6239.F29D11.2,6239.F32A5.1a,6239.F33G12.4.1,6239.F35G12.10.1,6239.F41G4.2a,6239.F52E1.10,6239.F54C8.3,6239.F55C5.4,6239.F55G1.4,6239.F56A3.3a.1,6239.F56D12.5a.1,6239.H21P03.2.1,6239.K04C2.4.1,6239.K07F5.13c,6239.R119.7,6239.T01B11.3,623…
COMPARTMENTS	GOCC:0005634	Nucleus	29	1045	0.4	0.00054	6239.C03B8.4,6239.C07H6.6,6239.C25G4.5,6239.C33H5.6,6239.F10G7.4,6239.F11A10.3a,6239.F15H10.3b,6239.F18A1.8,6239.F25B5.2.1,6239.F29D11.2,6239.F32A5.1a,6239.F33G12.4.1,6239.F54C8.3,6239.F56A3.3a.1,6239.K02B12.8b,6239.K04C2.4.1,6239.K06A5.7.1,6239.K07F5.13c,6239.T01E8.5,6239.T03F1.9,6239.T06E4.3a,6239.T09A5.12.2,6239.T16H12.11.1,6239.T23G7.1,6239.Y37E11AL.8,6239.Y39G10AR.13.1,6239.Y54E10A.4b,6239.Z…
COMPARTMENTS	GOCC:0043186	P granule	7	57	1.05	0.00063	6239.C09G9.6,6239.F53G12.5b,6239.F54C9.8,6239.W03C9.7a.1,6239.Y65B4BL.2,6239.ZC404.8.1,6239.ZK381.4b
COMPARTMENTS	GOCC:0045495	Pole plasm	7	57	1.05	0.00063	6239.C09G9.6,6239.F53G12.5b,6239.F54C9.8,6239.W03C9.7a.1,6239.Y65B4BL.2,6239.ZC404.8.1,6239.ZK381.4b
COMPARTMENTS	GOCC:0060293	Germ plasm	7	57	1.05	0.00063	6239.C09G9.6,6239.F53G12.5b,6239.F54C9.8,6239.W03C9.7a.1,6239.Y65B4BL.2,6239.ZC404.8.1,6239.ZK381.4b
COMPARTMENTS	GOCC:0005815	Microtubule organizing center	8	86	0.93	0.00071	6239.C09G9.6,6239.C25A1.9a,6239.F10E9.8,6239.F32H2.3.1,6239.F35B12.5a,6239.F56A3.4,6239.Y39G10AR.12a,6239.ZK546.1b
COMPARTMENTS	GOCC:0005813	Centrosome	6	45	1.08	0.0014	6239.C09G9.6,6239.C25A1.9a,6239.F32H2.3.1,6239.F56A3.4,6239.Y39G10AR.12a,6239.ZK546.1b
COMPARTMENTS	GOCC:1990234	Transferase complex	13	293	0.6	0.0023	6239.C07H6.6,6239.C33H5.6,6239.F11A10.3a,6239.F15H10.3b,6239.F32A5.1a,6239.F33G12.4.1,6239.F41G4.2a,6239.F54C8.3,6239.H21P03.2.1,6239.K04C2.4.1,6239.T27A3.7,6239.Y37E11AL.8,6239.Y47D3A.15
COMPARTMENTS	GOCC:0035770	Ribonucleoprotein granule	7	78	0.91	0.0025	6239.C09G9.6,6239.F53G12.5b,6239.F54C9.8,6239.W03C9.7a.1,6239.Y65B4BL.2,6239.ZC404.8.1,6239.ZK381.4b
COMPARTMENTS	GOCC:0036464	Cytoplasmic ribonucleoprotein granule	7	77	0.92	0.0025	6239.C09G9.6,6239.F53G12.5b,6239.F54C9.8,6239.W03C9.7a.1,6239.Y65B4BL.2,6239.ZC404.8.1,6239.ZK381.4b
COMPARTMENTS	GOCC:0000152	Nuclear ubiquitin ligase complex	4	16	1.36	0.0036	6239.F11A10.3a,6239.F15H10.3b,6239.F54C8.3,6239.K04C2.4.1
COMPARTMENTS	GOCC:0043231	Intracellular membrane-bounded organelle	36	1721	0.28	0.0072	6239.C03B8.4,6239.C07H6.6,6239.C25G4.4,6239.C25G4.5,6239.C33H5.6,6239.C34B2.7.1,6239.C44E4.3,6239.F10G7.4,6239.F11A10.3a,6239.F15H10.3b,6239.F18A1.8,6239.F25B5.2.1,6239.F29D11.2,6239.F32A5.1a,6239.F33G12.4.1,6239.F35G12.10.1,6239.F41G4.2a,6239.F52E1.10,6239.F54C8.3,6239.F56A3.3a.1,6239.K02B12.8b,6239.K04C2.4.1,6239.K06A5.7.1,6239.K07F5.13c,6239.T01E8.5,6239.T03F1.9,6239.T06E4.3a,6239.T09A5.12.2,6…
COMPARTMENTS	GOCC:0000796	Condensin complex	3	7	1.59	0.0081	6239.C29E4.2,6239.F29D11.2,6239.F55C5.4
COMPARTMENTS	GOCC:1902494	Catalytic complex	17	581	0.42	0.0154	6239.C07H6.6,6239.C33H5.6,6239.C34B2.7.1,6239.C44E4.3,6239.F11A10.3a,6239.F15H10.3b,6239.F32A5.1a,6239.F33G12.4.1,6239.F41G4.2a,6239.F54C8.3,6239.H21P03.2.1,6239.K04C2.4.1,6239.T22D1.5,6239.T27A3.7,6239.Y37E11AL.8,6239.Y47D3A.15,6239.ZC434.7a
COMPARTMENTS	GOCC:0000151	Ubiquitin ligase complex	5	52	0.94	0.0197	6239.F11A10.3a,6239.F15H10.3b,6239.F33G12.4.1,6239.F54C8.3,6239.K04C2.4.1
COMPARTMENTS	GOCC:0005814	Centriole	3	11	1.39	0.0203	6239.F10E9.8,6239.F32H2.3.1,6239.F35B12.5a
COMPARTMENTS	GOCC:0031981	Nuclear lumen	13	388	0.48	0.0203	6239.C07H6.6,6239.C25G4.5,6239.C33H5.6,6239.F11A10.3a,6239.F32A5.1a,6239.K02B12.8b,6239.T03F1.9,6239.T06E4.3a,6239.T16H12.11.1,6239.Y37E11AL.8,6239.Y54E10A.4b,6239.ZK546.1b,6239.ZK863.4.1
COMPARTMENTS	GOCC:0043227	Membrane-bounded organelle	37	1910	0.24	0.0203	6239.C03B8.4,6239.C07H6.6,6239.C25G4.4,6239.C25G4.5,6239.C33H5.6,6239.C34B2.7.1,6239.C44E4.3,6239.F10G7.4,6239.F11A10.3a,6239.F15H10.3b,6239.F18A1.8,6239.F25B5.2.1,6239.F29D11.2,6239.F32A5.1a,6239.F33G12.4.1,6239.F35G12.10.1,6239.F41G4.2a,6239.F52E1.10,6239.F54C8.3,6239.F56A3.3a.1,6239.K02B12.8b,6239.K04C2.4.1,6239.K06A5.7.1,6239.K07F5.13c,6239.T01B11.3,6239.T01E8.5,6239.T03F1.9,6239.T06E4.3a,623…
COMPARTMENTS	GOCC:0099080	Supramolecular complex	12	334	0.51	0.0203	6239.C09G9.6,6239.F53G12.5b,6239.F54C9.8,6239.F55G1.4,6239.W03C9.2,6239.W03C9.7a.1,6239.Y39G10AR.12a,6239.Y39G10AR.13.1,6239.Y39G10AR.2a,6239.Y65B4BL.2,6239.ZC404.8.1,6239.ZK381.4b
COMPARTMENTS	GOCC:0015630	Microtubule cytoskeleton	8	164	0.65	0.0246	6239.C09G9.6,6239.C25A1.9a,6239.F10E9.8,6239.F32H2.3.1,6239.F35B12.5a,6239.F56A3.4,6239.Y39G10AR.12a,6239.ZK546.1b
COMPARTMENTS	GOCC:0031974	Membrane-enclosed lumen	14	455	0.45	0.0246	6239.C07H6.6,6239.C25G4.5,6239.C33H5.6,6239.F11A10.3a,6239.F32A5.1a,6239.K02B12.8b,6239.T03F1.9,6239.T06E4.3a,6239.T16H12.11.1,6239.Y37E11AL.8,6239.Y54E10A.4b,6239.ZC434.7a,6239.ZK546.1b,6239.ZK863.4.1
COMPARTMENTS	GOCC:0043233	Organelle lumen	14	454	0.45	0.0246	6239.C07H6.6,6239.C25G4.5,6239.C33H5.6,6239.F11A10.3a,6239.F32A5.1a,6239.K02B12.8b,6239.T03F1.9,6239.T06E4.3a,6239.T16H12.11.1,6239.Y37E11AL.8,6239.Y54E10A.4b,6239.ZC434.7a,6239.ZK546.1b,6239.ZK863.4.1
COMPARTMENTS	GOCC:0044815	DNA packaging complex	3	13	1.32	0.0246	6239.C29E4.2,6239.F29D11.2,6239.F55C5.4
COMPARTMENTS	GOCC:0070013	Intracellular organelle lumen	14	452	0.45	0.0246	6239.C07H6.6,6239.C25G4.5,6239.C33H5.6,6239.F11A10.3a,6239.F32A5.1a,6239.K02B12.8b,6239.T03F1.9,6239.T06E4.3a,6239.T16H12.11.1,6239.Y37E11AL.8,6239.Y54E10A.4b,6239.ZC434.7a,6239.ZK546.1b,6239.ZK863.4.1
COMPARTMENTS	GOCC:0098687	Chromosomal region	5	61	0.87	0.027	6239.C07H6.6,6239.F55G1.4,6239.T03F1.9,6239.Y39G10AR.13.1,6239.Y39G10AR.2a
COMPARTMENTS	GOCC:1990423	RZZ complex	2	3	1.78	0.04	6239.F55G1.4,6239.Y39G10AR.2a
UniProt Keywords	KW-0131	Cell cycle	17	165	0.97	5.24e-09	6239.C25A1.9a,6239.C25G4.5,6239.C29E4.2,6239.F10E9.8,6239.F10G7.4,6239.F15H10.3b,6239.F25B5.2.1,6239.F29D11.2,6239.F32H2.3.1,6239.F35B12.5a,6239.F54C8.3,6239.F54C9.8,6239.F55G1.4,6239.F56A3.4,6239.K06A5.7.1,6239.K08E7.3,6239.Y39G10AR.2a
UniProt Keywords	KW-0132	Cell division	12	131	0.92	1e-05	6239.C25G4.5,6239.C29E4.2,6239.F10G7.4,6239.F15H10.3b,6239.F25B5.2.1,6239.F29D11.2,6239.F54C8.3,6239.F54C9.8,6239.F55G1.4,6239.K06A5.7.1,6239.K08E7.3,6239.Y39G10AR.2a
UniProt Keywords	KW-0498	Mitosis	10	96	0.98	3.01e-05	6239.C25G4.5,6239.C29E4.2,6239.F10G7.4,6239.F15H10.3b,6239.F29D11.2,6239.F54C8.3,6239.F55G1.4,6239.K06A5.7.1,6239.K08E7.3,6239.Y39G10AR.2a
UniProt Keywords	KW-0217	Developmental protein	15	381	0.55	0.0028	6239.C03B8.4,6239.F10E9.8,6239.F15H10.3b,6239.F25B5.2.1,6239.F32H2.3.1,6239.F35B12.5a,6239.F54C8.3,6239.F54C9.8,6239.F56A3.4,6239.F59B2.6,6239.H02I12.1,6239.K08E7.3,6239.K10B2.5,6239.Y39G10AR.2a,6239.ZK381.4b
UniProt Keywords	KW-0158	Chromosome	8	115	0.8	0.0046	6239.C07H6.6,6239.C25G4.5,6239.C29E4.2,6239.F10G7.4,6239.F29D11.2,6239.F55G1.4,6239.K04C2.4.1,6239.Y39G10AR.2a
UniProt Keywords	KW-0469	Meiosis	6	86	0.8	0.0326	6239.C25G4.5,6239.C29E4.2,6239.F15H10.3b,6239.F29D11.2,6239.F54C8.3,6239.Y39G10AR.2a
UniProt Keywords	KW-0694	RNA-binding	10	246	0.57	0.0326	6239.C09G9.6,6239.C41G7.3,6239.D1037.1,6239.F52B5.6.4,6239.F54C9.8,6239.R119.7,6239.Y54E10A.4b,6239.ZC404.8.1,6239.ZK1127.1.1,6239.ZK381.4b

## Sheet: STRING_Enrichment_analysis_PO_1
#category	term ID	term description	observed gene count	background gene count	strength	false discovery rate	matching proteins in your network (IDs)
GO Process	GO:0006796	Phosphate-containing compound metabolic process	29	978	0.51	5.38e-05	6239.C09D4.3,6239.C14A4.13,6239.C35E7.10a,6239.C49C3.10a,6239.C49C8.1,6239.C50F4.10,6239.C56G2.5,6239.F08G5.2,6239.F16A11.3d,6239.F20D6.6,6239.F22D6.1,6239.F22D6.9,6239.F25B3.4,6239.F25F2.1b,6239.F38E1.3,6239.F41G3.5,6239.F57B9.8,6239.F58D5.4a,6239.H04M03.1,6239.H05L14.1,6239.K09C6.7a,6239.M05B5.1,6239.R05H5.2,6239.T16G12.7,6239.T21G5.1,6239.Y47G6A.5a,6239.Y69E1A.4,6239.ZK354.2b,6239.ZK354.8
GO Process	GO:0018105	Peptidyl-serine phosphorylation	11	109	1.04	5.38e-05	6239.C09D4.3,6239.C14A4.13,6239.C49C8.1,6239.C50F4.10,6239.C56G2.5,6239.F25F2.1b,6239.F38E1.3,6239.F41G3.5,6239.H05L14.1,6239.K09C6.7a,6239.ZK354.2b
GO Process	GO:0018107	Peptidyl-threonine phosphorylation	10	91	1.08	5.38e-05	6239.C09D4.3,6239.C14A4.13,6239.C49C8.1,6239.C50F4.10,6239.F25F2.1b,6239.F38E1.3,6239.F41G3.5,6239.H05L14.1,6239.K09C6.7a,6239.ZK354.2b
GO Process	GO:0018193	Peptidyl-amino acid modification	17	373	0.7	5.38e-05	6239.C09D4.3,6239.C14A4.13,6239.C35E7.10a,6239.C49C8.1,6239.C50F4.10,6239.C56G2.5,6239.F22D6.1,6239.F25F2.1b,6239.F38E1.3,6239.F41G3.5,6239.F57B9.8,6239.F58D5.4a,6239.H05L14.1,6239.K09C6.7a,6239.T21G5.1,6239.Y47G6A.5a,6239.ZK354.2b
GO Process	GO:0006464	Cellular protein modification process	28	1117	0.44	0.00051	6239.C09D4.3,6239.C14A4.13,6239.C35E7.10a,6239.C49C3.10a,6239.C49C8.1,6239.C50F4.10,6239.C56G2.5,6239.F16A11.3d,6239.F20D6.6,6239.F22D6.1,6239.F22D6.9,6239.F25B3.4,6239.F25F2.1b,6239.F38E1.3,6239.F41G3.5,6239.F57B9.8,6239.F58D5.4a,6239.H05L14.1,6239.K09C6.7a,6239.M05B5.1,6239.R05H5.2,6239.T07D1.2.1,6239.T16G12.7,6239.T21G5.1,6239.Y47G6A.5a,6239.Y69E1A.4,6239.ZK354.2b,6239.ZK354.8
GO Process	GO:0044267	Cellular protein metabolic process	32	1527	0.36	0.0025	6239.C09D4.3,6239.C14A4.13,6239.C30B5.3,6239.C35E7.10a,6239.C49C3.10a,6239.C49C8.1,6239.C50F4.10,6239.C52E4.1,6239.C56G2.5,6239.F16A11.3d,6239.F20D6.6,6239.F22D6.1,6239.F22D6.9,6239.F25B3.4,6239.F25F2.1b,6239.F32H5.1,6239.F38E1.3,6239.F41G3.5,6239.F48E8.4,6239.F57B9.8,6239.F58D5.4a,6239.H05L14.1,6239.K09C6.7a,6239.M05B5.1,6239.R05H5.2,6239.T07D1.2.1,6239.T16G12.7,6239.T21G5.1,6239.Y47G6A.5a,6239.…
GO Process	GO:0019538	Protein metabolic process	35	1813	0.32	0.0046	6239.C09D4.3,6239.C14A4.13,6239.C30B5.3,6239.C35E7.10a,6239.C49C3.10a,6239.C49C8.1,6239.C50F4.10,6239.C52E4.1,6239.C56G2.5,6239.F16A11.3d,6239.F20D6.6,6239.F21F8.3.2,6239.F22D6.1,6239.F22D6.9,6239.F25B3.4,6239.F25F2.1b,6239.F28A12.4.1,6239.F32H5.1,6239.F38E1.3,6239.F41G3.5,6239.F48E8.4,6239.F57B9.8,6239.F58D5.4a,6239.H05L14.1,6239.K09C6.7a,6239.M05B5.1,6239.R05H5.2,6239.T07D1.2.1,6239.T16G12.7,62…
GO Process	GO:0006470	Protein dephosphorylation	9	151	0.81	0.0048	6239.F16A11.3d,6239.F20D6.6,6239.F22D6.9,6239.F25B3.4,6239.M05B5.1,6239.R05H5.2,6239.T16G12.7,6239.Y69E1A.4,6239.ZK354.8
GO Process	GO:1901564	Organonitrogen compound metabolic process	37	2228	0.26	0.045	6239.C09D4.3,6239.C09G9.4,6239.C14A4.13,6239.C30B5.3,6239.C35E7.10a,6239.C49C3.10a,6239.C49C8.1,6239.C50F4.10,6239.C52E4.1,6239.C56G2.5,6239.F16A11.3d,6239.F20D6.6,6239.F21F8.3.2,6239.F22D6.1,6239.F22D6.9,6239.F25B3.4,6239.F25F2.1b,6239.F28A12.4.1,6239.F32H5.1,6239.F38E1.3,6239.F41G3.5,6239.F48E8.4,6239.F57B9.8,6239.F58D5.4a,6239.H05L14.1,6239.K09C6.7a,6239.M05B5.1,6239.R05H5.2,6239.T07D1.2.1,623…
GO Function	GO:0004672	Protein kinase activity	18	355	0.74	9.33e-06	6239.C09D4.3,6239.C14A4.13,6239.C35E7.10a,6239.C49C3.10a,6239.C49C8.1,6239.C50F4.10,6239.C56G2.5,6239.F22D6.1,6239.F25F2.1b,6239.F38E1.3,6239.F41G3.5,6239.F57B9.8,6239.F58D5.4a,6239.H05L14.1,6239.K09C6.7a,6239.T21G5.1,6239.Y47G6A.5a,6239.ZK354.2b
GO Function	GO:0140096	Catalytic activity, acting on a protein	32	1107	0.5	9.33e-06	6239.C09D4.3,6239.C14A4.13,6239.C35E7.10a,6239.C49C3.10a,6239.C49C8.1,6239.C50F4.10,6239.C52E4.1,6239.C56G2.5,6239.F20D6.6,6239.F21F8.3.2,6239.F22D6.1,6239.F22D6.9,6239.F25B3.4,6239.F25F2.1b,6239.F28A12.4.1,6239.F32H5.1,6239.F38E1.3,6239.F41G3.5,6239.F57B9.8,6239.F58D5.4a,6239.H05L14.1,6239.H32C10.3,6239.K09C6.7a,6239.M05B5.1,6239.R05H5.2,6239.T16G12.7,6239.T21G5.1,6239.T24C4.1,6239.Y47G6A.5a,623…
GO Function	GO:0016301	Kinase activity	19	472	0.64	3.98e-05	6239.C09D4.3,6239.C14A4.13,6239.C35E7.10a,6239.C49C3.10a,6239.C49C8.1,6239.C50F4.10,6239.C56G2.5,6239.F22D6.1,6239.F25F2.1b,6239.F38E1.3,6239.F41G3.5,6239.F57B9.8,6239.F58D5.4a,6239.H04M03.1,6239.H05L14.1,6239.K09C6.7a,6239.T21G5.1,6239.Y47G6A.5a,6239.ZK354.2b
GO Function	GO:0004674	Protein serine/threonine kinase activity	12	265	0.69	0.0023	6239.C09D4.3,6239.C14A4.13,6239.C49C3.10a,6239.C49C8.1,6239.C50F4.10,6239.C56G2.5,6239.F25F2.1b,6239.F38E1.3,6239.F41G3.5,6239.H05L14.1,6239.K09C6.7a,6239.ZK354.2b
GO Function	GO:0004715	Non-membrane spanning protein tyrosine kinase activity	5	40	1.14	0.0124	6239.C35E7.10a,6239.F22D6.1,6239.F57B9.8,6239.T21G5.1,6239.Y47G6A.5a
GO Function	GO:0004721	Phosphoprotein phosphatase activity	8	142	0.79	0.0138	6239.F20D6.6,6239.F22D6.9,6239.F25B3.4,6239.M05B5.1,6239.R05H5.2,6239.T16G12.7,6239.Y69E1A.4,6239.ZK354.8
GO Function	GO:0004713	Protein tyrosine kinase activity	6	74	0.95	0.016	6239.C35E7.10a,6239.F22D6.1,6239.F57B9.8,6239.F58D5.4a,6239.T21G5.1,6239.Y47G6A.5a
GO Function	GO:0004722	Protein serine/threonine phosphatase activity	5	49	1.05	0.021	6239.F20D6.6,6239.F22D6.9,6239.F25B3.4,6239.T16G12.7,6239.Y69E1A.4
GO Function	GO:0005524	ATP binding	19	797	0.42	0.0212	6239.C09D4.3,6239.C14A4.13,6239.C35E7.10a,6239.C49C3.10a,6239.C49C8.1,6239.C50F4.10,6239.C56G2.5,6239.F11F1.1a,6239.F22D6.1,6239.F25F2.1b,6239.F38E1.3,6239.F41G3.5,6239.F57B9.8,6239.H05L14.1,6239.T21G5.1,6239.T26A5.1,6239.W02B12.7,6239.Y47G6A.5a,6239.ZK354.2b
GO Function	GO:0035639	Purine ribonucleoside triphosphate binding	21	967	0.38	0.0257	6239.C03C10.4,6239.C09D4.3,6239.C14A4.13,6239.C35E7.10a,6239.C49C3.10a,6239.C49C8.1,6239.C50F4.10,6239.C56G2.5,6239.F11F1.1a,6239.F22D6.1,6239.F25F2.1b,6239.F38E1.3,6239.F41G3.5,6239.F57B9.8,6239.H04M03.1,6239.H05L14.1,6239.T21G5.1,6239.T26A5.1,6239.W02B12.7,6239.Y47G6A.5a,6239.ZK354.2b
GO Function	GO:0097367	Carbohydrate derivative binding	22	1049	0.36	0.027	6239.C03C10.4,6239.C09D4.3,6239.C14A4.13,6239.C16H3.2,6239.C35E7.10a,6239.C49C3.10a,6239.C49C8.1,6239.C50F4.10,6239.C56G2.5,6239.F11F1.1a,6239.F22D6.1,6239.F25F2.1b,6239.F38E1.3,6239.F41G3.5,6239.F57B9.8,6239.H04M03.1,6239.H05L14.1,6239.T21G5.1,6239.T26A5.1,6239.W02B12.7,6239.Y47G6A.5a,6239.ZK354.2b
GO Function	GO:0032555	Purine ribonucleotide binding	21	989	0.37	0.0303	6239.C03C10.4,6239.C09D4.3,6239.C14A4.13,6239.C35E7.10a,6239.C49C3.10a,6239.C49C8.1,6239.C50F4.10,6239.C56G2.5,6239.F11F1.1a,6239.F22D6.1,6239.F25F2.1b,6239.F38E1.3,6239.F41G3.5,6239.F57B9.8,6239.H04M03.1,6239.H05L14.1,6239.T21G5.1,6239.T26A5.1,6239.W02B12.7,6239.Y47G6A.5a,6239.ZK354.2b
STRING clusters	6239_CL:17430	Mostly uncharacterized, incl. msp (major sperm protein) domain, and phosphoprotein phosphatase activity	22	143	1.23	2.91e-16	6239.C04F12.7,6239.C09D4.3,6239.C14C10.1,6239.C24A11.1,6239.C33F10.12,6239.C50F4.10,6239.C54G4.3,6239.D1081.5,6239.F17E9.5,6239.F20D6.6,6239.F32B6.4.2,6239.F32H2.7,6239.F40F9.3,6239.F41G3.5,6239.F58E6.5,6239.K01H12.4,6239.K06A5.2,6239.R09E10.3,6239.R09E10.6,6239.Y38E10A.17,6239.Y51B9A.5,6239.ZK354.8
STRING clusters	6239_CL:17432	Mostly uncharacterized, incl. msp (major sperm protein) domain, and peptidyl-threonine phosphorylation	19	131	1.2	7.54e-14	6239.C04F12.7,6239.C09D4.3,6239.C14C10.1,6239.C24A11.1,6239.C33F10.12,6239.C50F4.10,6239.C54G4.3,6239.D1081.5,6239.F17E9.5,6239.F32B6.4.2,6239.F32H2.7,6239.F40F9.3,6239.F58E6.5,6239.K01H12.4,6239.K06A5.2,6239.R09E10.6,6239.Y38E10A.17,6239.Y51B9A.5,6239.ZK354.8
STRING clusters	6239_CL:17435	Mostly uncharacterized, incl. major sperm protein (msp) domain, and male meiotic nuclear division	15	105	1.19	1.54e-10	6239.C04F12.7,6239.C09D4.3,6239.C14C10.1,6239.C33F10.12,6239.C54G4.3,6239.D1081.5,6239.F17E9.5,6239.F32B6.4.2,6239.F32H2.7,6239.F40F9.3,6239.F58E6.5,6239.K01H12.4,6239.K06A5.2,6239.R09E10.6,6239.Y38E10A.17
STRING clusters	6239_CL:17438	Mostly uncharacterized, incl. msp (major sperm protein) domain, and male meiotic nuclear division	13	97	1.17	1.14e-08	6239.C04F12.7,6239.C09D4.3,6239.C14C10.1,6239.C54G4.3,6239.D1081.5,6239.F17E9.5,6239.F32B6.4.2,6239.F32H2.7,6239.F58E6.5,6239.K01H12.4,6239.K06A5.2,6239.R09E10.6,6239.Y38E10A.17
STRING clusters	6239_CL:17444	Mixed, incl. male meiotic nuclear division, and major sperm protein (msp) domain	8	37	1.37	3.04e-06	6239.C04F12.7,6239.C14C10.1,6239.F17E9.5,6239.F32B6.4.2,6239.F32H2.7,6239.K06A5.2,6239.R09E10.6,6239.Y38E10A.17
STRING clusters	6239_CL:17806	Mixed, incl. non-membrane spanning protein tyrosine kinase activity, and peptidyl-threonine phosphorylation	6	29	1.35	0.00023	6239.C09G9.4,6239.C30B5.3,6239.F02C9.4,6239.F48C1.7,6239.H06H21.9,6239.Y46G5A.22a
STRING clusters	6239_CL:18074	Mixed, incl. non-membrane spanning protein tyrosine kinase activity, and protein tyrosine phosphatase, catalytic domain	7	49	1.19	0.00023	6239.C14A4.13,6239.C35E7.10a,6239.F14F7.4,6239.F38E1.3,6239.H05L14.1,6239.K09C6.7a,6239.T16G12.7
STRING clusters	6239_CL:18076	Mixed, incl. fes/fps/fer, sh2 domain, and protein tyrosine phosphatase, catalytic domain	6	43	1.18	0.0014	6239.C14A4.13,6239.C35E7.10a,6239.F38E1.3,6239.H05L14.1,6239.K09C6.7a,6239.T16G12.7
STRING clusters	6239_CL:17523	Mixed, incl. male meiotic nuclear division, and interactor of zyg-11	4	12	1.56	0.0026	6239.C14C10.1,6239.F17E9.5,6239.F32H2.7,6239.Y38E10A.17
STRING clusters	6239_CL:22172	Mixed, incl. innate immune response, and membrane raft	10	183	0.78	0.0026	6239.C16H3.2,6239.C28C12.5,6239.C52E4.1,6239.F28A12.4.1,6239.F35C5.5a,6239.R06B10.3,6239.Y51A2D.9a,6239.Y54G2A.14.1,6239.ZK822.4,6239.ZK896.6
STRING clusters	6239_CL:17450	Mostly uncharacterized, incl. protein of unknown function duf856, caenorhabditis species, and cytochrome c	4	14	1.49	0.0037	6239.C04F12.7,6239.F32B6.4.2,6239.K06A5.2,6239.R09E10.6
STRING clusters	6239_CL:22173	Mixed, incl. innate immune response, and membrane raft	9	169	0.76	0.0064	6239.C16H3.2,6239.C28C12.5,6239.C52E4.1,6239.F28A12.4.1,6239.F35C5.5a,6239.R06B10.3,6239.Y51A2D.9a,6239.Y54G2A.14.1,6239.ZK822.4
STRING clusters	6239_CL:16571	C-terminal to LisH motif.	3	5	1.82	0.0066	6239.F53E2.1,6239.T07D1.2.1,6239.Y54E5A.7a
STRING clusters	6239_CL:17808	Mostly uncharacterized, incl. fes/fps/fer, sh2 domain, and p-type atpase subfamily iic, subunit alpha	4	18	1.39	0.0067	6239.C09G9.4,6239.F02C9.4,6239.F48C1.7,6239.H06H21.9
STRING clusters	6239_CL:10545	Mixed, incl. peptidyl-tyrosine autophosphorylation, and socs7, sh2 domain	3	7	1.67	0.0122	6239.F22D6.1,6239.F57B9.8,6239.Y47G6A.5a
STRING clusters	6239_CL:17712	Mostly uncharacterized, incl. protein of unknown function duf870, caenorhabditis species, and protein of unknown function duf856, caenorhabditis species	4	22	1.3	0.0122	6239.C24A11.1,6239.C50F4.10,6239.Y51B9A.5,6239.ZK354.8
STRING clusters	6239_CL:17715	Mixed, incl. protein of unknown function duf870, caenorhabditis species, and ah/bar domain superfamily	3	7	1.67	0.0122	6239.C24A11.1,6239.C50F4.10,6239.Y51B9A.5
STRING clusters	6239_CL:17598	Mostly uncharacterized, incl. uncharacterized protein c27d6.3-like, and ptp type protein phosphatase	5	46	1.07	0.0125	6239.C09D4.3,6239.C54G4.3,6239.D1081.5,6239.F58E6.5,6239.K01H12.4
STRING clusters	6239_CL:18257	Mixed, incl. msp (major sperm protein) domain, and prominin	5	46	1.07	0.0125	6239.B0252.5,6239.Y6E2A.10,6239.ZK512.10,6239.ZK616.61,6239.ZK858.8
STRING clusters	6239_CL:18081	Mixed, incl. fes/fps/fer, sh2 domain, and domain of unknown function wsn	4	24	1.26	0.0136	6239.C14A4.13,6239.C35E7.10a,6239.F38E1.3,6239.T16G12.7
STRING clusters	6239_CL:28574	Mostly uncharacterized, incl. protein sepa-1, and gap junction hemi-channel activity	4	24	1.26	0.0136	6239.C25B8.4b,6239.F08G12.10,6239.F58B3.9,6239.T04D3.5.1
STRING clusters	6239_CL:17451	Mostly uncharacterized, incl. pdz domain-containing protein gipc1/2/3, and protein of unknown function duf856, caenorhabditis species	3	9	1.56	0.0172	6239.C04F12.7,6239.K06A5.2,6239.R09E10.6
STRING clusters	6239_CL:17766	Mostly uncharacterized, incl. group xii secretory phospholipase a2 precursor, and hotdog acyl-coa thioesterase (acot)-type domain	3	9	1.56	0.0172	6239.F20D6.6,6239.F41G3.5,6239.R09E10.3
STRING clusters	6239_CL:18510	Mostly uncharacterized, incl. dhhc palmitoyltransferase, and piwi domain	4	27	1.21	0.018	6239.B0393.4,6239.H32C10.3,6239.Y69E1A.4,6239.Y69E1A.8
STRING clusters	6239_CL:10490	Mixed, incl. transmembrane receptor protein tyrosine kinase signaling pathway, and mtor signaling pathway	6	85	0.89	0.0183	6239.C05D11.4,6239.F22D6.1,6239.F54D12.6a,6239.F57B9.8,6239.F58D5.4a,6239.Y47G6A.5a
STRING clusters	6239_CL:28600	Mixed, incl. caveolin-1, invertebrates, and gap junction hemi-channel activity	3	11	1.47	0.0235	6239.F08G12.10,6239.F58B3.9,6239.T04D3.5.1
STRING clusters	6239_CL:10489	Mixed, incl. mapk signaling pathway, and protein tyrosine kinase activity	7	131	0.77	0.0242	6239.C05D11.4,6239.C49C3.10a,6239.F22D6.1,6239.F54D12.6a,6239.F57B9.8,6239.F58D5.4a,6239.Y47G6A.5a
STRING clusters	6239_CL:10491	Mixed, incl. transmembrane receptor protein tyrosine kinase signaling pathway, and tor signaling	5	59	0.97	0.0256	6239.C05D11.4,6239.F22D6.1,6239.F54D12.6a,6239.F57B9.8,6239.Y47G6A.5a
STRING clusters	6239_CL:22174	Mixed, incl. innate immune response, and membrane raft	7	137	0.75	0.0298	6239.C16H3.2,6239.C28C12.5,6239.C52E4.1,6239.F28A12.4.1,6239.F35C5.5a,6239.R06B10.3,6239.Y54G2A.14.1
STRING clusters	6239_CL:17810	Mostly uncharacterized, incl. p-type atpase subfamily iic, subunit alpha, and regulation of wnt signaling pathway involved in digestive tract morphogenesis	3	13	1.4	0.0306	6239.F02C9.4,6239.F48C1.7,6239.H06H21.9
STRING clusters	6239_CL:22176	Mostly uncharacterized, incl. membrane raft, and papain family cysteine protease	6	98	0.83	0.0306	6239.C16H3.2,6239.C28C12.5,6239.C52E4.1,6239.F28A12.4.1,6239.F35C5.5a,6239.R06B10.3
STRING clusters	6239_CL:17599	Mostly uncharacterized, incl. uncharacterized protein c27d6.3-like, and ptp type protein phosphatase	4	40	1.04	0.0477	6239.C54G4.3,6239.D1081.5,6239.F58E6.5,6239.K01H12.4
STRING clusters	6239_CL:18512	Mostly uncharacterized, incl. dhhc palmitoyltransferase, and 3-oxo-5-alpha-steroid 4-dehydrogenase	3	16	1.31	0.0477	6239.H32C10.3,6239.Y69E1A.4,6239.Y69E1A.8
UniProt Keywords	KW-0418	Kinase	15	398	0.61	0.002	6239.C09D4.3,6239.C14A4.13,6239.C35E7.10a,6239.C49C3.10a,6239.C49C8.1,6239.C50F4.10,6239.C56G2.5,6239.F22D6.1,6239.F25F2.1b,6239.F38E1.3,6239.F41G3.5,6239.F57B9.8,6239.H04M03.1,6239.Y47G6A.5a,6239.ZK354.2b
Pfam	PF00069	Protein kinase domain	17	329	0.75	2.99e-05	6239.C09D4.3,6239.C14A4.13,6239.C35E7.10a,6239.C49C3.10a,6239.C49C8.1,6239.C50F4.10,6239.C56G2.5,6239.F22D6.1,6239.F25F2.1b,6239.F38E1.3,6239.F41G3.5,6239.F57B9.8,6239.F58D5.4a,6239.H05L14.1,6239.T21G5.1,6239.Y47G6A.5a,6239.ZK354.2b
Pfam	PF07714	Protein tyrosine kinase	15	314	0.72	0.00029	6239.C09D4.3,6239.C14A4.13,6239.C35E7.10a,6239.C49C3.10a,6239.C49C8.1,6239.C50F4.10,6239.C56G2.5,6239.F22D6.1,6239.F38E1.3,6239.F41G3.5,6239.F57B9.8,6239.F58D5.4a,6239.T21G5.1,6239.Y47G6A.5a,6239.ZK354.2b
Pfam	PF00017	SH2 domain	5	39	1.15	0.0307	6239.C35E7.10a,6239.F22D6.1,6239.F57B9.8,6239.T21G5.1,6239.Y47G6A.5a
InterPro	IPR000719	Protein kinase domain	16	331	0.72	0.00035	6239.C09D4.3,6239.C14A4.13,6239.C35E7.10a,6239.C49C3.10a,6239.C49C8.1,6239.C50F4.10,6239.C56G2.5,6239.F22D6.1,6239.F25F2.1b,6239.F38E1.3,6239.F41G3.5,6239.F57B9.8,6239.F58D5.4a,6239.H05L14.1,6239.Y47G6A.5a,6239.ZK354.2b
InterPro	IPR011009	Protein kinase-like domain superfamily	17	385	0.68	0.00035	6239.C09D4.3,6239.C14A4.13,6239.C35E7.10a,6239.C49C3.10a,6239.C49C8.1,6239.C50F4.10,6239.C56G2.5,6239.F22D6.1,6239.F25F2.1b,6239.F38E1.3,6239.F41G3.5,6239.F57B9.8,6239.F58D5.4a,6239.H05L14.1,6239.K09C6.7a,6239.Y47G6A.5a,6239.ZK354.2b
InterPro	IPR006186	Serine/threonine-specific protein phosphatase/bis(5-nucleosyl)-tetraphosphatase	5	33	1.22	0.0264	6239.F20D6.6,6239.F22D6.9,6239.F25B3.4,6239.T16G12.7,6239.Y69E1A.4
SMART	SM00156	Protein phosphatase 2A homologues, catalytic domain.	5	31	1.25	0.0095	6239.F20D6.6,6239.F22D6.9,6239.F25B3.4,6239.T16G12.7,6239.Y69E1A.4
SMART	SM00219	Tyrosine kinase, catalytic domain	5	49	1.05	0.035	6239.C35E7.10a,6239.F22D6.1,6239.F57B9.8,6239.T21G5.1,6239.Y47G6A.5a
SMART	SM00252	Src homology 2 domains	5	54	1	0.0356	6239.C35E7.10a,6239.F22D6.1,6239.F57B9.8,6239.T21G5.1,6239.Y47G6A.5a
