# Supplementary material for: Nematode gene annotation by machine-learning-assisted proteotranscriptomics enables proteome-wide evolutionary analysis
Source: HighWire-hosted journal article supplement (doi:10.1101/gr.277070.122), 2023-01-01
Supplement: Supplemental_Table_S9.xlsx [file Supplemental_Table_S9.xlsx]

## Sheet: Legend
Supplemental_Table_S9
Table of orthology relations in the 12 species as produced by ProteinOrtho

## Sheet: Table_S9
group ID	Species	Genes	Alg.-Conn.	CEW1_GF	DF5006_GF	DF5012_GF	DF5112_GF	MT8872_GF	c_elegans.PRJNA13758.WS276.protein.fa	cbrenneri_GF	cbriggsae_GF	celegans_GF	celegans_GG	cinopinata_GF	cjaponica_GF	cremanei_GF	ppacificus_GF
1	14	80	0.113	CEW1@@@TRINITY_DN3396_c0_g1_i1.p1	DF5006@@@TRINITY_DN1082_c0_g1_i1.p1	DF5012@@@TRINITY_DN2909_c0_g1_i1.p1,DF5012@@@TRINITY_DN2909_c0_g1_i2.p1	DF5112@@@TRINITY_DN2005_c1_g2_i2.p1,DF5112@@@TRINITY_DN2005_c1_g2_i4.p1	MT8872@@@TRINITY_DN2191_c0_g1_i10.p1,MT8872@@@TRINITY_DN2191_c0_g1_i13.p1,MT8872@@@TRINITY_DN2191_c0_g1_i14.p1,MT8872@@@TRINITY_DN2191_c0_g1_i2.p1,MT8872@@@TRINITY_DN2191_c0_g1_i12.p1,MT8872@@@TRINITY_DN2191_c0_g1_i8.p1,MT8872@@@TRINITY_DN2191_c0_g1_i11.p1,MT8872@@@TRINITY_DN2191_c0_g1_i3.p1,MT8872@@@TRINITY_DN2191_c0_g1_i5.p1,MT8872@@@TRINITY_DN2191_c0_g1_i9.p1,MT8872@@@TRINITY_DN2191_c0_g1_i4.p…	T27F2.2c,T27F2.2g,T27F2.2j,T27F2.2k,T27F2.2a,T27F2.2e,T27F2.2f,T27F2.2l,T27F2.2m,T27F2.2d,T27F2.2i,T27F2.2b,T27F2.2h	cbrenneri@@@TRINITY_DN1775_c0_g1_i4.p1,cbrenneri@@@TRINITY_DN1775_c0_g1_i3.p1,cbrenneri@@@TRINITY_DN1775_c0_g1_i7.p1,cbrenneri@@@TRINITY_DN1775_c0_g1_i9.p1,cbrenneri@@@TRINITY_DN1775_c0_g1_i6.p1,cbrenneri@@@TRINITY_DN1775_c0_g1_i5.p1,cbrenneri@@@TRINITY_DN1775_c0_g1_i11.p1,cbrenneri@@@TRINITY_DN1775_c0_g1_i10.p1,cbrenneri@@@TRINITY_DN1775_c0_g1_i8.p1	cbriggsae@@@TRINITY_DN2697_c3_g1_i3.p1,cbriggsae@@@TRINITY_DN2697_c3_g1_i9.p1,cbriggsae@@@TRINITY_DN2697_c3_g1_i4.p1,cbriggsae@@@TRINITY_DN2697_c3_g1_i8.p1,cbriggsae@@@TRINITY_DN2697_c3_g1_i2.p1,cbriggsae@@@TRINITY_DN2697_c3_g1_i1.p1	celegans@@@TRINITY_DN6185_c0_g2_i5.p1,celegans@@@TRINITY_DN6185_c0_g2_i3.p1,celegans@@@TRINITY_DN6185_c0_g2_i1.p1	celegans@@@TRINITY_GG_18715_c0_g1_i1.p1,celegans@@@TRINITY_GG_18715_c0_g1_i2.p1,celegans@@@TRINITY_GG_18715_c0_g1_i5.p1,celegans@@@TRINITY_GG_18715_c0_g1_i8.p1	cinopinata@@@TRINITY_DN1476_c0_g1_i5.p1,cinopinata@@@TRINITY_DN1476_c0_g1_i6.p1,cinopinata@@@TRINITY_DN1476_c0_g1_i1.p1,cinopinata@@@TRINITY_DN1476_c0_g1_i7.p1,cinopinata@@@TRINITY_DN1476_c0_g1_i2.p1,cinopinata@@@TRINITY_DN1476_c0_g1_i8.p1	cjaponica@@@TRINITY_DN7091_c0_g1_i1.p1,cjaponica@@@TRINITY_DN7091_c0_g1_i2.p1	cremanei@@@TRINITY_DN3527_c0_g1_i11.p1,cremanei@@@TRINITY_DN3527_c0_g1_i12.p1,cremanei@@@TRINITY_DN3527_c0_g1_i10.p1,cremanei@@@TRINITY_DN3527_c0_g1_i7.p1,cremanei@@@TRINITY_DN3527_c0_g1_i17.p1,cremanei@@@TRINITY_DN3527_c0_g1_i5.p1,cremanei@@@TRINITY_DN3527_c0_g1_i2.p1,cremanei@@@TRINITY_DN3527_c0_g1_i9.p1,cremanei@@@TRINITY_DN3527_c0_g1_i15.p1,cremanei@@@TRINITY_DN3527_c0_g1_i1.p1,cremanei@@@TRI…	ppacificus@@@TRINITY_DN3130_c0_g1_i11.p1,ppacificus@@@TRINITY_DN3130_c0_g1_i5.p1,ppacificus@@@TRINITY_DN3130_c0_g1_i6.p1,ppacificus@@@TRINITY_DN3130_c0_g1_i7.p1,ppacificus@@@TRINITY_DN3130_c0_g1_i2.p1,ppacificus@@@TRINITY_DN3130_c0_g1_i1.p1,ppacificus@@@TRINITY_DN3130_c0_g1_i12.p1
2	14	71	0.102	CEW1@@@TRINITY_DN1044_c0_g1_i3.p1,CEW1@@@TRINITY_DN1044_c0_g1_i1.p1,CEW1@@@TRINITY_DN1044_c0_g1_i2.p1,CEW1@@@TRINITY_DN1044_c0_g1_i5.p1,CEW1@@@TRINITY_DN1044_c0_g1_i6.p1,CEW1@@@TRINITY_DN1044_c0_g1_i7.p1	DF5006@@@TRINITY_DN1556_c0_g1_i4.p1,DF5006@@@TRINITY_DN1556_c0_g1_i1.p1,DF5006@@@TRINITY_DN1556_c0_g1_i2.p1,DF5006@@@TRINITY_DN1556_c0_g1_i3.p1	DF5012@@@TRINITY_DN2785_c0_g1_i4.p1,DF5012@@@TRINITY_DN2785_c0_g1_i6.p1,DF5012@@@TRINITY_DN2785_c0_g1_i5.p1,DF5012@@@TRINITY_DN2785_c0_g1_i2.p1,DF5012@@@TRINITY_DN2785_c0_g1_i1.p1,DF5012@@@TRINITY_DN2785_c0_g1_i3.p1	DF5112@@@TRINITY_DN7391_c0_g1_i9.p1,DF5112@@@TRINITY_DN7391_c0_g1_i12.p1,DF5112@@@TRINITY_DN7391_c0_g1_i14.p1,DF5112@@@TRINITY_DN7391_c0_g1_i4.p1,DF5112@@@TRINITY_DN7391_c0_g1_i8.p1,DF5112@@@TRINITY_DN7391_c0_g1_i5.p1,DF5112@@@TRINITY_DN7391_c0_g1_i7.p1	MT8872@@@TRINITY_DN1224_c0_g2_i2.p1,MT8872@@@TRINITY_DN1224_c0_g2_i3.p1,MT8872@@@TRINITY_DN1224_c0_g2_i5.p1,MT8872@@@TRINITY_DN1224_c0_g2_i4.p1,MT8872@@@TRINITY_DN1224_c0_g2_i1.p1	E01H11.1b,E01H11.1e,E01H11.1a,E01H11.1c,E01H11.1f,E01H11.1d	cbrenneri@@@TRINITY_DN1988_c0_g1_i1.p1,cbrenneri@@@TRINITY_DN1988_c0_g1_i7.p1,cbrenneri@@@TRINITY_DN1988_c0_g1_i4.p1,cbrenneri@@@TRINITY_DN1988_c0_g1_i9.p1,cbrenneri@@@TRINITY_DN1988_c0_g1_i3.p1,cbrenneri@@@TRINITY_DN1988_c0_g1_i8.p1,cbrenneri@@@TRINITY_DN1988_c0_g1_i10.p1,cbrenneri@@@TRINITY_DN1988_c0_g1_i5.p1	cbriggsae@@@TRINITY_DN554_c0_g1_i2.p1,cbriggsae@@@TRINITY_DN554_c0_g1_i1.p1,cbriggsae@@@TRINITY_DN554_c0_g1_i3.p1,cbriggsae@@@TRINITY_DN554_c0_g1_i4.p1	celegans@@@TRINITY_DN1376_c0_g1_i1.p1,celegans@@@TRINITY_DN1376_c0_g1_i2.p1,celegans@@@TRINITY_DN1376_c0_g1_i5.p1,celegans@@@TRINITY_DN1376_c0_g1_i4.p1,celegans@@@TRINITY_DN1376_c0_g1_i3.p1	celegans@@@TRINITY_GG_5402_c0_g1_i1.p1	cinopinata@@@TRINITY_DN1267_c0_g1_i2.p1,cinopinata@@@TRINITY_DN1267_c0_g1_i7.p1,cinopinata@@@TRINITY_DN1267_c0_g1_i8.p1,cinopinata@@@TRINITY_DN1267_c0_g1_i1.p1,cinopinata@@@TRINITY_DN1267_c0_g1_i3.p1,cinopinata@@@TRINITY_DN1267_c0_g1_i4.p1	cjaponica@@@TRINITY_DN630_c0_g1_i4.p1,cjaponica@@@TRINITY_DN630_c0_g1_i8.p1,cjaponica@@@TRINITY_DN630_c0_g1_i6.p1,cjaponica@@@TRINITY_DN630_c0_g1_i1.p1	cremanei@@@TRINITY_DN3941_c0_g1_i6.p1,cremanei@@@TRINITY_DN3941_c0_g1_i8.p1,cremanei@@@TRINITY_DN3941_c0_g1_i7.p1,cremanei@@@TRINITY_DN3941_c0_g1_i2.p1,cremanei@@@TRINITY_DN3941_c0_g1_i9.p1,cremanei@@@TRINITY_DN3941_c0_g1_i3.p1	ppacificus@@@TRINITY_DN2137_c0_g1_i1.p1,ppacificus@@@TRINITY_DN2137_c0_g1_i3.p1,ppacificus@@@TRINITY_DN2137_c0_g1_i2.p1
3	14	70	0.135	CEW1@@@TRINITY_DN1276_c0_g1_i2.p1,CEW1@@@TRINITY_DN1276_c0_g1_i1.p1	DF5006@@@TRINITY_DN4982_c2_g1_i1.p1,DF5006@@@TRINITY_DN4982_c2_g1_i2.p1	DF5012@@@TRINITY_DN336_c0_g1_i1.p1,DF5012@@@TRINITY_DN336_c0_g1_i4.p1	DF5112@@@TRINITY_DN2825_c0_g1_i4.p1,DF5112@@@TRINITY_DN2825_c0_g1_i8.p1,DF5112@@@TRINITY_DN2825_c0_g1_i2.p1,DF5112@@@TRINITY_DN2825_c0_g1_i6.p1,DF5112@@@TRINITY_DN2825_c0_g1_i1.p1	MT8872@@@TRINITY_DN14123_c0_g1_i1.p1	F49E11.1g,F49E11.1a,F49E11.1m,F49E11.1c,F49E11.1i,F49E11.1b,F49E11.1k,F49E11.1e,F49E11.1f,F49E11.1j,F49E11.1h,F49E11.1l,F49E11.1d,F49E11.1n	cbrenneri@@@TRINITY_DN1038_c0_g2_i10.p1,cbrenneri@@@TRINITY_DN1038_c0_g2_i11.p1,cbrenneri@@@TRINITY_DN1038_c0_g2_i5.p1,cbrenneri@@@TRINITY_DN1038_c0_g2_i4.p1,cbrenneri@@@TRINITY_DN1038_c0_g2_i7.p1,cbrenneri@@@TRINITY_DN1038_c0_g2_i2.p1,cbrenneri@@@TRINITY_DN1038_c0_g2_i1.p1,cbrenneri@@@TRINITY_DN1038_c0_g2_i8.p1,cbrenneri@@@TRINITY_DN1038_c0_g2_i9.p1,cbrenneri@@@TRINITY_DN1038_c0_g2_i3.p1	cbriggsae@@@TRINITY_DN1444_c0_g1_i3.p1,cbriggsae@@@TRINITY_DN1444_c0_g1_i2.p1,cbriggsae@@@TRINITY_DN1444_c0_g1_i5.p1,cbriggsae@@@TRINITY_DN1444_c0_g1_i1.p1,cbriggsae@@@TRINITY_DN1444_c0_g1_i4.p1	celegans@@@TRINITY_DN3120_c0_g1_i2.p1,celegans@@@TRINITY_DN3120_c0_g1_i5.p1,celegans@@@TRINITY_DN3120_c0_g1_i4.p1,celegans@@@TRINITY_DN3120_c0_g1_i6.p1,celegans@@@TRINITY_DN3120_c0_g1_i3.p1,celegans@@@TRINITY_DN3120_c0_g1_i1.p1	celegans@@@TRINITY_GG_3881_c0_g1_i2.p1,celegans@@@TRINITY_GG_3881_c0_g1_i1.p1	cinopinata@@@TRINITY_DN73_c0_g1_i4.p1,cinopinata@@@TRINITY_DN73_c0_g1_i8.p1,cinopinata@@@TRINITY_DN73_c0_g1_i6.p1,cinopinata@@@TRINITY_DN73_c0_g1_i1.p1,cinopinata@@@TRINITY_DN73_c0_g1_i3.p1,cinopinata@@@TRINITY_DN73_c0_g1_i5.p1,cinopinata@@@TRINITY_DN73_c0_g1_i7.p1	cjaponica@@@TRINITY_DN586_c0_g1_i3.p1,cjaponica@@@TRINITY_DN586_c0_g1_i4.p1,cjaponica@@@TRINITY_DN586_c0_g1_i1.p1,cjaponica@@@TRINITY_DN586_c0_g1_i5.p1,cjaponica@@@TRINITY_DN586_c0_g1_i2.p1	cremanei@@@TRINITY_DN7587_c0_g1_i3.p1,cremanei@@@TRINITY_DN7587_c0_g1_i1.p1,cremanei@@@TRINITY_DN7587_c0_g1_i2.p1,cremanei@@@TRINITY_DN7587_c0_g1_i6.p1	ppacificus@@@TRINITY_DN2084_c0_g1_i1.p1,ppacificus@@@TRINITY_DN2084_c0_g1_i11.p1,ppacificus@@@TRINITY_DN2084_c0_g1_i13.p1,ppacificus@@@TRINITY_DN2084_c0_g1_i3.p1,ppacificus@@@TRINITY_DN2084_c0_g1_i8.p1
4	14	69	0.18	CEW1@@@TRINITY_DN2219_c0_g1_i1.p1,CEW1@@@TRINITY_DN2219_c0_g1_i11.p1,CEW1@@@TRINITY_DN2219_c0_g1_i5.p1	DF5006@@@TRINITY_DN4134_c0_g1_i1.p1,DF5006@@@TRINITY_DN4134_c0_g1_i2.p1,DF5006@@@TRINITY_DN4134_c0_g1_i3.p1,DF5006@@@TRINITY_DN4134_c0_g1_i4.p1,DF5006@@@TRINITY_DN4134_c0_g1_i5.p1,DF5006@@@TRINITY_DN4134_c0_g1_i6.p1	DF5012@@@TRINITY_DN2765_c0_g1_i1.p1,DF5012@@@TRINITY_DN2765_c0_g1_i20.p1,DF5012@@@TRINITY_DN2765_c0_g1_i25.p1,DF5012@@@TRINITY_DN2765_c0_g1_i26.p1	DF5112@@@TRINITY_DN1701_c0_g1_i10.p1,DF5112@@@TRINITY_DN1701_c0_g1_i2.p1,DF5112@@@TRINITY_DN1701_c0_g1_i4.p1,DF5112@@@TRINITY_DN1701_c0_g1_i6.p1	MT8872@@@TRINITY_DN10254_c0_g2_i4.p1,MT8872@@@TRINITY_DN10254_c0_g2_i7.p1	ZK897.1c,ZK897.1a,ZK897.1b,ZK897.1i,ZK897.1j,ZK897.1k,ZK897.1p,ZK897.1q,ZK897.1h,ZK897.1l,ZK897.1m,ZK897.1n,ZK897.1o,ZK897.1r	cbrenneri@@@TRINITY_DN4661_c0_g1_i15.p1,cbrenneri@@@TRINITY_DN4661_c0_g1_i2.p1	cbriggsae@@@TRINITY_DN6774_c0_g1_i2.p1,cbriggsae@@@TRINITY_DN6774_c0_g1_i7.p1,cbriggsae@@@TRINITY_DN6774_c0_g1_i9.p1	celegans@@@TRINITY_DN6451_c0_g1_i3.p1,celegans@@@TRINITY_DN6451_c0_g1_i8.p1,celegans@@@TRINITY_DN6451_c0_g1_i4.p1,celegans@@@TRINITY_DN6451_c0_g1_i5.p1,celegans@@@TRINITY_DN6451_c0_g1_i7.p1,celegans@@@TRINITY_DN6451_c0_g1_i1.p1	celegans@@@TRINITY_GG_2560_c0_g1_i5.p1,celegans@@@TRINITY_GG_2560_c0_g1_i8.p1,celegans@@@TRINITY_GG_2560_c0_g1_i2.p1,celegans@@@TRINITY_GG_2560_c0_g1_i7.p1,celegans@@@TRINITY_GG_2560_c0_g1_i9.p1,celegans@@@TRINITY_GG_2560_c0_g1_i1.p1	cinopinata@@@TRINITY_DN1892_c0_g1_i3.p1,cinopinata@@@TRINITY_DN1892_c0_g1_i5.p1,cinopinata@@@TRINITY_DN1892_c0_g1_i9.p1,cinopinata@@@TRINITY_DN1892_c0_g1_i6.p1,cinopinata@@@TRINITY_DN1892_c0_g1_i1.p1,cinopinata@@@TRINITY_DN1892_c0_g1_i13.p1	cjaponica@@@TRINITY_DN6314_c0_g2_i7.p1,cjaponica@@@TRINITY_DN6314_c0_g2_i10.p1,cjaponica@@@TRINITY_DN6314_c0_g2_i11.p1	cremanei@@@TRINITY_DN8700_c0_g1_i1.p1,cremanei@@@TRINITY_DN8700_c0_g1_i10.p1,cremanei@@@TRINITY_DN8700_c0_g1_i18.p1,cremanei@@@TRINITY_DN8700_c0_g1_i8.p1	ppacificus@@@TRINITY_DN3992_c0_g1_i1.p1,ppacificus@@@TRINITY_DN3992_c0_g1_i11.p1,ppacificus@@@TRINITY_DN3992_c0_g1_i5.p1,ppacificus@@@TRINITY_DN3992_c0_g1_i7.p1,ppacificus@@@TRINITY_DN3992_c0_g1_i10.p1,ppacificus@@@TRINITY_DN3992_c0_g1_i3.p1
5	14	66	0.32	CEW1@@@TRINITY_DN1196_c0_g1_i1.p1,CEW1@@@TRINITY_DN841_c0_g1_i2.p1	DF5006@@@TRINITY_DN1358_c0_g1_i1.p1,DF5006@@@TRINITY_DN1358_c0_g1_i2.p1	DF5012@@@TRINITY_DN2375_c0_g1_i1.p1,DF5012@@@TRINITY_DN2375_c0_g1_i2.p1,DF5012@@@TRINITY_DN2375_c0_g1_i3.p1,DF5012@@@TRINITY_DN2375_c0_g1_i4.p1	DF5112@@@TRINITY_DN622_c0_g1_i1.p1,DF5112@@@TRINITY_DN622_c0_g1_i4.p1,DF5112@@@TRINITY_DN622_c0_g1_i6.p1,DF5112@@@TRINITY_DN622_c0_g1_i7.p1,DF5112@@@TRINITY_DN622_c0_g1_i3.p1,DF5112@@@TRINITY_DN622_c0_g1_i9.p1,DF5112@@@TRINITY_DN622_c0_g1_i8.p1,DF5112@@@TRINITY_DN622_c0_g1_i2.p1	MT8872@@@TRINITY_DN4063_c0_g1_i3.p1,MT8872@@@TRINITY_DN4063_c0_g1_i7.p1,MT8872@@@TRINITY_DN4063_c0_g1_i8.p1	T27D12.2a,T27D12.2b	cbrenneri@@@TRINITY_DN2573_c0_g1_i12.p1,cbrenneri@@@TRINITY_DN2573_c0_g1_i14.p1,cbrenneri@@@TRINITY_DN2573_c0_g1_i16.p1,cbrenneri@@@TRINITY_DN2573_c0_g1_i6.p1,cbrenneri@@@TRINITY_DN2573_c0_g1_i10.p1,cbrenneri@@@TRINITY_DN2573_c0_g1_i3.p1,cbrenneri@@@TRINITY_DN2573_c0_g1_i15.p1,cbrenneri@@@TRINITY_DN2573_c0_g1_i9.p1	cbriggsae@@@TRINITY_DN2155_c0_g2_i3.p1,cbriggsae@@@TRINITY_DN2155_c0_g2_i7.p1,cbriggsae@@@TRINITY_DN2155_c0_g2_i1.p1,cbriggsae@@@TRINITY_DN2155_c0_g2_i2.p1,cbriggsae@@@TRINITY_DN2155_c0_g2_i8.p1,cbriggsae@@@TRINITY_DN2155_c0_g2_i4.p1	celegans@@@TRINITY_DN1613_c0_g1_i1.p1,celegans@@@TRINITY_DN1613_c0_g1_i2.p1,celegans@@@TRINITY_DN1613_c0_g1_i3.p1,celegans@@@TRINITY_DN1613_c0_g1_i4.p1,celegans@@@TRINITY_DN1613_c0_g1_i6.p1,celegans@@@TRINITY_DN1613_c0_g1_i5.p1,celegans@@@TRINITY_DN1613_c0_g1_i7.p1,celegans@@@TRINITY_DN1613_c0_g1_i9.p1	celegans@@@TRINITY_GG_13514_c0_g1_i1.p1,celegans@@@TRINITY_GG_13514_c0_g1_i2.p1,celegans@@@TRINITY_GG_13514_c0_g1_i3.p1,celegans@@@TRINITY_GG_13514_c0_g1_i4.p1,celegans@@@TRINITY_GG_13514_c0_g1_i6.p1,celegans@@@TRINITY_GG_13514_c0_g1_i5.p1,celegans@@@TRINITY_GG_13514_c0_g1_i8.p1,celegans@@@TRINITY_GG_13514_c0_g1_i9.p1	cinopinata@@@TRINITY_DN15502_c0_g1_i2.p1,cinopinata@@@TRINITY_DN15502_c0_g1_i7.p1,cinopinata@@@TRINITY_DN15502_c0_g1_i8.p1,cinopinata@@@TRINITY_DN15502_c0_g1_i9.p1	cjaponica@@@TRINITY_DN1835_c0_g1_i6.p1,cjaponica@@@TRINITY_DN1835_c0_g1_i4.p1	cremanei@@@TRINITY_DN2668_c0_g1_i10.p1,cremanei@@@TRINITY_DN2668_c0_g1_i13.p1,cremanei@@@TRINITY_DN2668_c0_g1_i15.p1,cremanei@@@TRINITY_DN2668_c0_g1_i16.p1,cremanei@@@TRINITY_DN2668_c0_g1_i5.p1,cremanei@@@TRINITY_DN2668_c0_g1_i1.p1,cremanei@@@TRINITY_DN2668_c0_g1_i14.p1	ppacificus@@@TRINITY_DN677_c0_g1_i1.p1,ppacificus@@@TRINITY_DN677_c0_g1_i3.p1
6	14	63	0.166	CEW1@@@TRINITY_DN637_c0_g1_i12.p1,CEW1@@@TRINITY_DN637_c0_g1_i2.p1,CEW1@@@TRINITY_DN637_c0_g1_i13.p1,CEW1@@@TRINITY_DN637_c0_g1_i14.p1,CEW1@@@TRINITY_DN637_c0_g1_i7.p1	DF5006@@@TRINITY_DN5858_c0_g1_i8.p1,DF5006@@@TRINITY_DN5858_c0_g1_i4.p1,DF5006@@@TRINITY_DN5858_c0_g1_i5.p1,DF5006@@@TRINITY_DN5858_c0_g1_i3.p1	DF5012@@@TRINITY_DN790_c0_g1_i9.p1	DF5112@@@TRINITY_DN177_c0_g1_i15.p1,DF5112@@@TRINITY_DN177_c0_g1_i3.p1,DF5112@@@TRINITY_DN177_c0_g1_i5.p1,DF5112@@@TRINITY_DN177_c0_g1_i2.p1,DF5112@@@TRINITY_DN177_c0_g1_i7.p1,DF5112@@@TRINITY_DN177_c0_g1_i10.p1	MT8872@@@TRINITY_DN414_c0_g1_i11.p1,MT8872@@@TRINITY_DN414_c0_g1_i16.p1,MT8872@@@TRINITY_DN414_c0_g1_i2.p1,MT8872@@@TRINITY_DN414_c0_g1_i17.p1,MT8872@@@TRINITY_DN414_c0_g1_i7.p1,MT8872@@@TRINITY_DN414_c0_g1_i1.p1,MT8872@@@TRINITY_DN414_c0_g1_i14.p1,MT8872@@@TRINITY_DN414_c0_g1_i15.p1,MT8872@@@TRINITY_DN414_c0_g1_i10.p1,MT8872@@@TRINITY_DN414_c0_g1_i4.p1	ZK1098.10e,ZK1098.10b,ZK1098.10d,ZK1098.10a	cbrenneri@@@TRINITY_DN851_c0_g1_i18.p1,cbrenneri@@@TRINITY_DN851_c0_g1_i28.p1,cbrenneri@@@TRINITY_DN851_c0_g1_i19.p1,cbrenneri@@@TRINITY_DN851_c0_g1_i23.p1,cbrenneri@@@TRINITY_DN851_c0_g1_i4.p1,cbrenneri@@@TRINITY_DN851_c0_g1_i13.p1,cbrenneri@@@TRINITY_DN851_c0_g1_i7.p1	cbriggsae@@@TRINITY_DN397_c0_g1_i3.p1,cbriggsae@@@TRINITY_DN397_c0_g1_i6.p1,cbriggsae@@@TRINITY_DN397_c0_g1_i13.p1,cbriggsae@@@TRINITY_DN397_c0_g1_i16.p1	celegans@@@TRINITY_DN604_c0_g1_i22.p1,celegans@@@TRINITY_DN604_c0_g1_i11.p1,celegans@@@TRINITY_DN604_c0_g1_i17.p1,celegans@@@TRINITY_DN604_c0_g1_i1.p1,celegans@@@TRINITY_DN604_c0_g1_i16.p1	celegans@@@TRINITY_GG_7845_c0_g1_i7.p1,celegans@@@TRINITY_GG_7845_c0_g1_i2.p1,celegans@@@TRINITY_GG_7845_c0_g1_i5.p1	cinopinata@@@TRINITY_DN78_c0_g1_i5.p1	cjaponica@@@TRINITY_DN3241_c0_g1_i8.p1,cjaponica@@@TRINITY_DN3241_c0_g1_i1.p1,cjaponica@@@TRINITY_DN3241_c0_g1_i22.p1,cjaponica@@@TRINITY_DN3241_c0_g1_i18.p1,cjaponica@@@TRINITY_DN3241_c0_g1_i25.p1,cjaponica@@@TRINITY_DN3241_c0_g1_i26.p1	cremanei@@@TRINITY_DN235_c0_g2_i10.p1,cremanei@@@TRINITY_DN235_c0_g2_i12.p1,cremanei@@@TRINITY_DN235_c0_g2_i4.p1,cremanei@@@TRINITY_DN235_c0_g2_i17.p1,cremanei@@@TRINITY_DN235_c0_g2_i1.p1	ppacificus@@@TRINITY_DN1877_c0_g1_i2.p1,ppacificus@@@TRINITY_DN1877_c0_g1_i1.p1
7	14	59	0.135	CEW1@@@TRINITY_DN206_c0_g1_i1.p1,CEW1@@@TRINITY_DN206_c0_g1_i3.p1,CEW1@@@TRINITY_DN206_c0_g1_i6.p1,CEW1@@@TRINITY_DN206_c0_g1_i5.p1,CEW1@@@TRINITY_DN206_c0_g1_i9.p1	DF5006@@@TRINITY_DN114_c0_g2_i2.p1,DF5006@@@TRINITY_DN114_c0_g2_i3.p1,DF5006@@@TRINITY_DN114_c0_g2_i1.p1	DF5012@@@TRINITY_DN502_c0_g1_i2.p1,DF5012@@@TRINITY_DN502_c0_g1_i3.p1,DF5012@@@TRINITY_DN502_c0_g1_i1.p1	DF5112@@@TRINITY_DN1022_c0_g1_i3.p1,DF5112@@@TRINITY_DN1022_c0_g1_i4.p1,DF5112@@@TRINITY_DN1022_c0_g1_i5.p1	MT8872@@@TRINITY_DN8874_c1_g1_i3.p1,MT8872@@@TRINITY_DN8874_c1_g1_i6.p1,MT8872@@@TRINITY_DN8874_c1_g1_i2.p1	Y67D8C.10c,Y67D8C.10a,Y67D8C.10d,Y67D8C.10b	cbrenneri@@@TRINITY_DN394_c0_g1_i12.p1,cbrenneri@@@TRINITY_DN394_c0_g1_i11.p1,cbrenneri@@@TRINITY_DN394_c0_g1_i5.p1,cbrenneri@@@TRINITY_DN394_c0_g1_i7.p1,cbrenneri@@@TRINITY_DN394_c0_g1_i1.p1,cbrenneri@@@TRINITY_DN394_c0_g1_i2.p1,cbrenneri@@@TRINITY_DN394_c0_g1_i9.p1	cbriggsae@@@TRINITY_DN14_c0_g1_i4.p1,cbriggsae@@@TRINITY_DN14_c0_g1_i3.p1,cbriggsae@@@TRINITY_DN14_c0_g1_i1.p1	celegans@@@TRINITY_DN103_c0_g1_i6.p1,celegans@@@TRINITY_DN103_c0_g1_i1.p1,celegans@@@TRINITY_DN103_c0_g1_i4.p1	celegans@@@TRINITY_GG_15704_c0_g1_i1.p1,celegans@@@TRINITY_GG_15704_c0_g1_i2.p1	cinopinata@@@TRINITY_DN11314_c0_g1_i1.p1,cinopinata@@@TRINITY_DN11314_c0_g1_i4.p1,cinopinata@@@TRINITY_DN11314_c0_g1_i7.p1,cinopinata@@@TRINITY_DN11314_c0_g1_i5.p1,cinopinata@@@TRINITY_DN11314_c0_g1_i8.p1,cinopinata@@@TRINITY_DN11314_c0_g1_i2.p1	cjaponica@@@TRINITY_DN149_c0_g1_i2.p1,cjaponica@@@TRINITY_DN149_c0_g1_i5.p1,cjaponica@@@TRINITY_DN149_c0_g1_i1.p1,cjaponica@@@TRINITY_DN149_c0_g1_i3.p1	cremanei@@@TRINITY_DN330_c0_g1_i3.p1,cremanei@@@TRINITY_DN330_c0_g1_i2.p1,cremanei@@@TRINITY_DN330_c0_g1_i1.p1	ppacificus@@@TRINITY_DN453_c0_g1_i10.p1,ppacificus@@@TRINITY_DN453_c0_g1_i2.p1,ppacificus@@@TRINITY_DN453_c0_g1_i6.p1,ppacificus@@@TRINITY_DN453_c0_g1_i8.p1,ppacificus@@@TRINITY_DN453_c0_g1_i3.p1,ppacificus@@@TRINITY_DN453_c0_g1_i12.p1,ppacificus@@@TRINITY_DN453_c0_g1_i4.p1,ppacificus@@@TRINITY_DN453_c0_g1_i14.p1,ppacificus@@@TRINITY_DN453_c0_g1_i9.p1,ppacificus@@@TRINITY_DN453_c0_g1_i5.p1
8	14	58	0.505	CEW1@@@TRINITY_DN443_c0_g1_i1.p1,CEW1@@@TRINITY_DN443_c0_g1_i2.p1,CEW1@@@TRINITY_DN443_c0_g1_i3.p1,CEW1@@@TRINITY_DN443_c0_g1_i4.p1,CEW1@@@TRINITY_DN443_c0_g1_i5.p1	DF5006@@@TRINITY_DN287_c0_g1_i1.p1,DF5006@@@TRINITY_DN287_c0_g1_i7.p1,DF5006@@@TRINITY_DN287_c0_g1_i2.p1,DF5006@@@TRINITY_DN287_c0_g1_i3.p1	DF5012@@@TRINITY_DN166_c0_g1_i1.p1,DF5012@@@TRINITY_DN166_c0_g1_i3.p1,DF5012@@@TRINITY_DN166_c0_g1_i4.p1,DF5012@@@TRINITY_DN166_c0_g1_i6.p1	DF5112@@@TRINITY_DN8113_c0_g2_i6.p1,DF5112@@@TRINITY_DN8113_c0_g2_i7.p1,DF5112@@@TRINITY_DN8113_c0_g2_i5.p1,DF5112@@@TRINITY_DN8113_c0_g2_i9.p1,DF5112@@@TRINITY_DN8113_c0_g2_i8.p1,DF5112@@@TRINITY_DN8113_c0_g2_i1.p1	MT8872@@@TRINITY_DN232_c0_g1_i2.p1,MT8872@@@TRINITY_DN232_c0_g1_i4.p1,MT8872@@@TRINITY_DN232_c0_g1_i5.p1,MT8872@@@TRINITY_DN232_c0_g1_i6.p1	F53C3.13a,F53C3.13e,F53C3.13f,F53C3.13c,F53C3.13d,F53C3.13b	cbrenneri@@@TRINITY_DN708_c0_g1_i8.p1,cbrenneri@@@TRINITY_DN708_c0_g1_i6.p1,cbrenneri@@@TRINITY_DN708_c0_g1_i7.p1,cbrenneri@@@TRINITY_DN708_c0_g1_i12.p1,cbrenneri@@@TRINITY_DN708_c0_g1_i5.p1	cbriggsae@@@TRINITY_DN113_c0_g1_i1.p1,cbriggsae@@@TRINITY_DN113_c0_g1_i7.p1,cbriggsae@@@TRINITY_DN113_c0_g1_i3.p1,cbriggsae@@@TRINITY_DN113_c0_g1_i5.p1,cbriggsae@@@TRINITY_DN113_c0_g1_i8.p1	celegans@@@TRINITY_DN820_c0_g2_i1.p1,celegans@@@TRINITY_DN820_c0_g2_i2.p1,celegans@@@TRINITY_DN820_c0_g2_i3.p1,celegans@@@TRINITY_DN820_c0_g2_i4.p1	celegans@@@TRINITY_GG_12983_c0_g1_i1.p1	cinopinata@@@TRINITY_DN389_c0_g1_i5.p1,cinopinata@@@TRINITY_DN389_c0_g1_i8.p1,cinopinata@@@TRINITY_DN389_c0_g1_i3.p1,cinopinata@@@TRINITY_DN389_c0_g1_i1.p1,cinopinata@@@TRINITY_DN389_c0_g1_i6.p1,cinopinata@@@TRINITY_DN389_c0_g1_i2.p1	cjaponica@@@TRINITY_DN1041_c0_g1_i1.p1,cjaponica@@@TRINITY_DN1041_c0_g1_i4.p1,cjaponica@@@TRINITY_DN1041_c0_g1_i3.p1	cremanei@@@TRINITY_DN1954_c0_g2_i1.p1,cremanei@@@TRINITY_DN1954_c0_g2_i2.p1,cremanei@@@TRINITY_DN1954_c0_g2_i3.p1,cremanei@@@TRINITY_DN1954_c0_g2_i4.p1	ppacificus@@@TRINITY_DN213_c0_g1_i3.p1
9	14	58	0.145	CEW1@@@TRINITY_DN6685_c0_g1_i4.p1,CEW1@@@TRINITY_DN6685_c0_g1_i1.p1,CEW1@@@TRINITY_DN6685_c0_g1_i3.p1,CEW1@@@TRINITY_DN6685_c0_g1_i6.p1	DF5006@@@TRINITY_DN664_c1_g1_i1.p1,DF5006@@@TRINITY_DN664_c1_g1_i3.p1,DF5006@@@TRINITY_DN664_c1_g1_i4.p1	DF5012@@@TRINITY_DN1382_c0_g1_i1.p1,DF5012@@@TRINITY_DN1382_c0_g1_i4.p1,DF5012@@@TRINITY_DN1382_c0_g1_i3.p1	DF5112@@@TRINITY_DN2079_c0_g1_i6.p1,DF5112@@@TRINITY_DN2079_c0_g1_i8.p1,DF5112@@@TRINITY_DN2079_c0_g1_i2.p1	MT8872@@@TRINITY_DN2834_c0_g1_i2.p1,MT8872@@@TRINITY_DN2834_c0_g1_i4.p1,MT8872@@@TRINITY_DN2834_c0_g1_i1.p1,MT8872@@@TRINITY_DN2834_c0_g1_i3.p1	R153.1b,R153.1h,R153.1d,R153.1e,R153.1g,R153.1a,R153.1c	cbrenneri@@@TRINITY_DN1797_c0_g1_i5.p1,cbrenneri@@@TRINITY_DN1797_c0_g1_i6.p1,cbrenneri@@@TRINITY_DN1797_c0_g1_i4.p1,cbrenneri@@@TRINITY_DN1797_c0_g1_i2.p1,cbrenneri@@@TRINITY_DN1797_c0_g1_i7.p1	cbriggsae@@@TRINITY_DN3820_c0_g1_i9.p1,cbriggsae@@@TRINITY_DN3820_c0_g1_i11.p1,cbriggsae@@@TRINITY_DN3820_c0_g1_i1.p1,cbriggsae@@@TRINITY_DN3820_c0_g1_i10.p1,cbriggsae@@@TRINITY_DN3820_c0_g1_i4.p1,cbriggsae@@@TRINITY_DN3820_c0_g1_i12.p1	celegans@@@TRINITY_DN2274_c0_g1_i1.p1,celegans@@@TRINITY_DN2274_c0_g1_i3.p1,celegans@@@TRINITY_DN2274_c0_g1_i2.p1,celegans@@@TRINITY_DN2274_c0_g1_i7.p1,celegans@@@TRINITY_DN2274_c0_g1_i6.p1,celegans@@@TRINITY_DN2274_c0_g1_i4.p1	celegans@@@TRINITY_GG_13502_c1_g1_i1.p1	cinopinata@@@TRINITY_DN9251_c0_g1_i1.p1,cinopinata@@@TRINITY_DN9251_c0_g1_i2.p1	cjaponica@@@TRINITY_DN3033_c0_g2_i3.p1,cjaponica@@@TRINITY_DN3033_c0_g2_i2.p1,cjaponica@@@TRINITY_DN3033_c0_g2_i6.p1,cjaponica@@@TRINITY_DN3033_c0_g2_i4.p1	cremanei@@@TRINITY_DN3562_c0_g1_i2.p1,cremanei@@@TRINITY_DN3562_c0_g1_i5.p1,cremanei@@@TRINITY_DN3562_c0_g1_i10.p1,cremanei@@@TRINITY_DN3562_c0_g1_i8.p1,cremanei@@@TRINITY_DN3562_c0_g1_i11.p1,cremanei@@@TRINITY_DN3562_c0_g1_i3.p1,cremanei@@@TRINITY_DN3562_c0_g1_i4.p1,cremanei@@@TRINITY_DN3562_c0_g1_i6.p1	ppacificus@@@TRINITY_DN1445_c0_g2_i1.p1,ppacificus@@@TRINITY_DN1445_c0_g2_i4.p1
10	14	56	0.393	CEW1@@@TRINITY_DN90_c0_g1_i1.p1,CEW1@@@TRINITY_DN90_c0_g1_i6.p1	DF5006@@@TRINITY_DN630_c0_g1_i1.p1,DF5006@@@TRINITY_DN630_c0_g1_i2.p1,DF5006@@@TRINITY_DN630_c0_g1_i3.p1,DF5006@@@TRINITY_DN630_c0_g1_i4.p1	DF5012@@@TRINITY_DN1163_c0_g2_i1.p1,DF5012@@@TRINITY_DN1163_c0_g2_i10.p1,DF5012@@@TRINITY_DN1163_c0_g2_i11.p1,DF5012@@@TRINITY_DN1163_c0_g2_i12.p1,DF5012@@@TRINITY_DN1163_c0_g2_i13.p1,DF5012@@@TRINITY_DN1163_c0_g2_i14.p1,DF5012@@@TRINITY_DN1163_c0_g2_i15.p1,DF5012@@@TRINITY_DN1163_c0_g2_i16.p1,DF5012@@@TRINITY_DN1163_c0_g2_i2.p1,DF5012@@@TRINITY_DN1163_c0_g2_i3.p1,DF5012@@@TRINITY_DN1163_c0_g2_i4…	DF5112@@@TRINITY_DN8875_c0_g1_i3.p1,DF5112@@@TRINITY_DN8875_c0_g1_i2.p1,DF5112@@@TRINITY_DN8875_c0_g1_i4.p1,DF5112@@@TRINITY_DN8875_c0_g1_i1.p1	MT8872@@@TRINITY_DN300_c0_g1_i1.p1,MT8872@@@TRINITY_DN300_c0_g1_i2.p1,MT8872@@@TRINITY_DN300_c0_g1_i3.p1	Y49E10.11c,Y49E10.11b,Y49E10.11a	cbrenneri@@@TRINITY_DN508_c0_g1_i2.p1,cbrenneri@@@TRINITY_DN508_c0_g1_i1.p1,cbrenneri@@@TRINITY_DN508_c0_g1_i3.p1	cbriggsae@@@TRINITY_DN745_c0_g1_i2.p1,cbriggsae@@@TRINITY_DN745_c0_g1_i3.p1,cbriggsae@@@TRINITY_DN745_c0_g1_i4.p1,cbriggsae@@@TRINITY_DN745_c0_g1_i5.p1,cbriggsae@@@TRINITY_DN745_c0_g1_i6.p1,cbriggsae@@@TRINITY_DN745_c0_g1_i1.p1	celegans@@@TRINITY_DN35_c0_g1_i2.p1,celegans@@@TRINITY_DN35_c0_g1_i1.p1	celegans@@@TRINITY_GG_20964_c0_g1_i2.p1,celegans@@@TRINITY_GG_20964_c0_g1_i1.p1	cinopinata@@@TRINITY_DN1107_c1_g2_i2.p1,cinopinata@@@TRINITY_DN1107_c1_g2_i1.p1	cjaponica@@@TRINITY_DN17878_c0_g1_i2.p1,cjaponica@@@TRINITY_DN17878_c0_g1_i4.p1,cjaponica@@@TRINITY_DN17878_c0_g1_i5.p1	cremanei@@@TRINITY_DN6994_c0_g1_i4.p1,cremanei@@@TRINITY_DN6994_c0_g1_i5.p1,cremanei@@@TRINITY_DN6994_c0_g1_i2.p1,cremanei@@@TRINITY_DN6994_c0_g1_i1.p1	ppacificus@@@TRINITY_DN7674_c0_g1_i1.p1,ppacificus@@@TRINITY_DN7674_c0_g1_i4.p1
11	14	56	0.332	CEW1@@@TRINITY_DN2083_c0_g1_i1.p1,CEW1@@@TRINITY_DN2083_c0_g1_i13.p1,CEW1@@@TRINITY_DN2083_c0_g1_i14.p1,CEW1@@@TRINITY_DN2083_c0_g1_i17.p1,CEW1@@@TRINITY_DN2083_c0_g1_i18.p1,CEW1@@@TRINITY_DN2083_c0_g1_i19.p1,CEW1@@@TRINITY_DN2083_c0_g1_i2.p1,CEW1@@@TRINITY_DN2083_c0_g1_i3.p1,CEW1@@@TRINITY_DN2083_c0_g1_i6.p1,CEW1@@@TRINITY_DN2083_c0_g1_i8.p1	DF5006@@@TRINITY_DN4404_c0_g1_i1.p1,DF5006@@@TRINITY_DN4404_c0_g1_i2.p1,DF5006@@@TRINITY_DN4404_c0_g1_i4.p1,DF5006@@@TRINITY_DN4404_c0_g1_i5.p1,DF5006@@@TRINITY_DN4404_c0_g1_i6.p1,DF5006@@@TRINITY_DN4404_c0_g1_i8.p1	DF5012@@@TRINITY_DN4046_c0_g1_i5.p1,DF5012@@@TRINITY_DN4046_c0_g1_i7.p1	DF5112@@@TRINITY_DN756_c0_g1_i6.p1,DF5112@@@TRINITY_DN756_c0_g1_i7.p1,DF5112@@@TRINITY_DN756_c0_g1_i4.p1,DF5112@@@TRINITY_DN756_c0_g1_i5.p1,DF5112@@@TRINITY_DN756_c0_g1_i9.p1,DF5112@@@TRINITY_DN756_c0_g1_i11.p1,DF5112@@@TRINITY_DN756_c0_g1_i10.p1	MT8872@@@TRINITY_DN5080_c0_g1_i2.p1	Y55F3C.3d,Y55F3C.3e,Y55F3C.3f,Y55F3C.3a,Y55F3C.3g,Y55F3C.3c	cbrenneri@@@TRINITY_DN7796_c0_g1_i13.p1,cbrenneri@@@TRINITY_DN7796_c0_g1_i5.p1,cbrenneri@@@TRINITY_DN7796_c0_g1_i8.p1	cbriggsae@@@TRINITY_DN974_c0_g1_i2.p1,cbriggsae@@@TRINITY_DN974_c0_g1_i6.p1,cbriggsae@@@TRINITY_DN974_c0_g1_i5.p1,cbriggsae@@@TRINITY_DN974_c0_g1_i1.p1	celegans@@@TRINITY_DN1087_c0_g1_i3.p1,celegans@@@TRINITY_DN1087_c0_g1_i5.p1,celegans@@@TRINITY_DN1087_c0_g1_i6.p1,celegans@@@TRINITY_DN1087_c0_g1_i2.p1	celegans@@@TRINITY_GG_2846_c0_g1_i4.p1,celegans@@@TRINITY_GG_2846_c0_g1_i3.p1	cinopinata@@@TRINITY_DN8787_c1_g1_i1.p1	cjaponica@@@TRINITY_DN4358_c0_g1_i4.p1,cjaponica@@@TRINITY_DN4358_c0_g1_i3.p1,cjaponica@@@TRINITY_DN4358_c0_g1_i11.p1	cremanei@@@TRINITY_DN3151_c0_g1_i11.p1,cremanei@@@TRINITY_DN3151_c0_g1_i6.p1,cremanei@@@TRINITY_DN3151_c0_g1_i7.p1,cremanei@@@TRINITY_DN3151_c0_g1_i5.p1,cremanei@@@TRINITY_DN3151_c0_g1_i9.p1	ppacificus@@@TRINITY_DN1836_c0_g1_i6.p1,ppacificus@@@TRINITY_DN1836_c0_g1_i8.p1
12	14	56	0.194	CEW1@@@TRINITY_DN7249_c0_g1_i1.p1,CEW1@@@TRINITY_DN7249_c0_g1_i2.p1,CEW1@@@TRINITY_DN7249_c0_g1_i3.p1	DF5006@@@TRINITY_DN4249_c0_g1_i1.p1,DF5006@@@TRINITY_DN4249_c0_g1_i4.p1,DF5006@@@TRINITY_DN4249_c0_g1_i6.p1,DF5006@@@TRINITY_DN4249_c0_g1_i7.p1,DF5006@@@TRINITY_DN4249_c0_g1_i8.p1,DF5006@@@TRINITY_DN4249_c0_g1_i3.p1,DF5006@@@TRINITY_DN4249_c0_g1_i9.p1,DF5006@@@TRINITY_DN4249_c0_g1_i2.p1,DF5006@@@TRINITY_DN4249_c0_g1_i10.p1	DF5012@@@TRINITY_DN1922_c0_g1_i1.p1,DF5012@@@TRINITY_DN1922_c0_g1_i19.p1,DF5012@@@TRINITY_DN1922_c0_g1_i10.p1,DF5012@@@TRINITY_DN1922_c0_g1_i12.p1,DF5012@@@TRINITY_DN1922_c0_g1_i16.p1,DF5012@@@TRINITY_DN1922_c0_g1_i6.p1,DF5012@@@TRINITY_DN1922_c0_g1_i13.p1,DF5012@@@TRINITY_DN1922_c0_g1_i2.p1,DF5012@@@TRINITY_DN1922_c0_g1_i18.p1	DF5112@@@TRINITY_DN678_c0_g2_i1.p1,DF5112@@@TRINITY_DN678_c0_g2_i3.p1	MT8872@@@TRINITY_DN3004_c0_g1_i1.p1	ZC328.3a	cbrenneri@@@TRINITY_DN4005_c0_g1_i2.p1,cbrenneri@@@TRINITY_DN4005_c0_g1_i5.p1,cbrenneri@@@TRINITY_DN4005_c0_g1_i3.p1	cbriggsae@@@TRINITY_DN1079_c0_g1_i1.p1,cbriggsae@@@TRINITY_DN1079_c0_g1_i6.p1,cbriggsae@@@TRINITY_DN1079_c0_g1_i3.p1	celegans@@@TRINITY_DN2486_c0_g1_i2.p1,celegans@@@TRINITY_DN2486_c0_g1_i4.p1,celegans@@@TRINITY_DN2486_c0_g1_i3.p1,celegans@@@TRINITY_DN2486_c0_g1_i5.p1	celegans@@@TRINITY_GG_21398_c0_g1_i4.p1,celegans@@@TRINITY_GG_21398_c0_g1_i2.p1,celegans@@@TRINITY_GG_21398_c0_g1_i3.p1,celegans@@@TRINITY_GG_21398_c0_g1_i1.p1	cinopinata@@@TRINITY_DN1121_c0_g1_i5.p1,cinopinata@@@TRINITY_DN1121_c0_g1_i2.p1,cinopinata@@@TRINITY_DN1121_c0_g1_i9.p1,cinopinata@@@TRINITY_DN1121_c0_g1_i1.p1	cjaponica@@@TRINITY_DN623_c0_g1_i5.p1,cjaponica@@@TRINITY_DN623_c0_g1_i1.p1,cjaponica@@@TRINITY_DN623_c0_g1_i8.p1,cjaponica@@@TRINITY_DN623_c0_g1_i3.p1	cremanei@@@TRINITY_DN3830_c0_g1_i1.p1,cremanei@@@TRINITY_DN3830_c0_g1_i9.p1,cremanei@@@TRINITY_DN3830_c0_g1_i3.p1,cremanei@@@TRINITY_DN3830_c0_g1_i6.p1,cremanei@@@TRINITY_DN3830_c0_g1_i8.p1	ppacificus@@@TRINITY_DN3170_c0_g1_i10.p1,ppacificus@@@TRINITY_DN3170_c0_g1_i8.p1,ppacificus@@@TRINITY_DN3170_c0_g1_i13.p1,ppacificus@@@TRINITY_DN3170_c0_g1_i1.p1
13	14	56	0.12	CEW1@@@TRINITY_DN445_c0_g1_i2.p1,CEW1@@@TRINITY_DN445_c0_g1_i4.p1	DF5006@@@TRINITY_DN65_c0_g3_i2.p1,DF5006@@@TRINITY_DN65_c0_g3_i1.p1	DF5012@@@TRINITY_DN1205_c0_g1_i2.p1,DF5012@@@TRINITY_DN1205_c0_g1_i3.p1,DF5012@@@TRINITY_DN1205_c0_g1_i6.p1,DF5012@@@TRINITY_DN1205_c0_g1_i4.p1,DF5012@@@TRINITY_DN1205_c0_g1_i5.p1,DF5012@@@TRINITY_DN1205_c0_g1_i8.p1,DF5012@@@TRINITY_DN1205_c0_g1_i1.p1,DF5012@@@TRINITY_DN1205_c0_g1_i7.p1,DF5012@@@TRINITY_DN1205_c0_g1_i9.p1	DF5112@@@TRINITY_DN1205_c0_g1_i2.p1,DF5112@@@TRINITY_DN1205_c0_g1_i1.p1	MT8872@@@TRINITY_DN1323_c0_g1_i2.p1,MT8872@@@TRINITY_DN1323_c0_g1_i1.p1,MT8872@@@TRINITY_DN1323_c0_g1_i3.p1	C33B4.3b,C33B4.3c,C33B4.3a	cbrenneri@@@TRINITY_DN4196_c0_g1_i1.p1,cbrenneri@@@TRINITY_DN4196_c0_g1_i5.p1,cbrenneri@@@TRINITY_DN4196_c0_g1_i8.p1,cbrenneri@@@TRINITY_DN4196_c0_g1_i9.p1,cbrenneri@@@TRINITY_DN4196_c0_g1_i6.p1	cbriggsae@@@TRINITY_DN3940_c0_g1_i4.p1,cbriggsae@@@TRINITY_DN3940_c0_g1_i8.p1,cbriggsae@@@TRINITY_DN3940_c0_g1_i5.p1,cbriggsae@@@TRINITY_DN3940_c0_g1_i7.p1	celegans@@@TRINITY_DN5038_c0_g1_i6.p1,celegans@@@TRINITY_DN5038_c0_g1_i5.p1,celegans@@@TRINITY_DN5038_c0_g1_i4.p1,celegans@@@TRINITY_DN5038_c0_g1_i3.p1,celegans@@@TRINITY_DN5038_c0_g1_i2.p1	celegans@@@TRINITY_GG_12040_c0_g1_i1.p1,celegans@@@TRINITY_GG_12040_c0_g1_i3.p1,celegans@@@TRINITY_GG_12040_c0_g1_i4.p1,celegans@@@TRINITY_GG_12040_c0_g1_i2.p1	cinopinata@@@TRINITY_DN1499_c0_g1_i5.p1,cinopinata@@@TRINITY_DN1499_c0_g1_i1.p1,cinopinata@@@TRINITY_DN1499_c0_g1_i3.p1,cinopinata@@@TRINITY_DN1499_c0_g1_i7.p1,cinopinata@@@TRINITY_DN1499_c0_g1_i4.p1,cinopinata@@@TRINITY_DN1499_c0_g1_i6.p1	cjaponica@@@TRINITY_DN1677_c0_g1_i2.p1,cjaponica@@@TRINITY_DN1677_c0_g1_i1.p1,cjaponica@@@TRINITY_DN1677_c0_g1_i3.p1,cjaponica@@@TRINITY_DN1677_c0_g1_i4.p1,cjaponica@@@TRINITY_DN1677_c0_g1_i5.p1	cremanei@@@TRINITY_DN624_c1_g1_i1.p1,cremanei@@@TRINITY_DN624_c1_g1_i3.p1,cremanei@@@TRINITY_DN624_c1_g1_i5.p1,cremanei@@@TRINITY_DN624_c1_g1_i2.p1	ppacificus@@@TRINITY_DN3832_c0_g1_i2.p1,ppacificus@@@TRINITY_DN3832_c0_g1_i3.p1
14	14	55	0.404	CEW1@@@TRINITY_DN8642_c0_g1_i1.p1,CEW1@@@TRINITY_DN8642_c0_g1_i2.p1,CEW1@@@TRINITY_DN8642_c0_g1_i3.p1,CEW1@@@TRINITY_DN8642_c0_g1_i4.p1,CEW1@@@TRINITY_DN8642_c0_g1_i5.p1,CEW1@@@TRINITY_DN8642_c0_g1_i6.p1	DF5006@@@TRINITY_DN723_c0_g1_i1.p1,DF5006@@@TRINITY_DN723_c0_g1_i3.p1	DF5012@@@TRINITY_DN398_c0_g1_i1.p1,DF5012@@@TRINITY_DN398_c0_g1_i2.p1,DF5012@@@TRINITY_DN398_c0_g1_i3.p1,DF5012@@@TRINITY_DN398_c0_g1_i5.p1,DF5012@@@TRINITY_DN398_c0_g1_i6.p1,DF5012@@@TRINITY_DN398_c0_g1_i7.p1	DF5112@@@TRINITY_DN489_c0_g1_i1.p1,DF5112@@@TRINITY_DN489_c0_g1_i2.p1,DF5112@@@TRINITY_DN489_c0_g1_i3.p1,DF5112@@@TRINITY_DN489_c0_g1_i4.p1,DF5112@@@TRINITY_DN489_c0_g1_i5.p1,DF5112@@@TRINITY_DN489_c0_g1_i6.p1,DF5112@@@TRINITY_DN489_c0_g1_i8.p1,DF5112@@@TRINITY_DN489_c0_g1_i9.p1	MT8872@@@TRINITY_DN6778_c0_g1_i1.p1,MT8872@@@TRINITY_DN6778_c0_g1_i2.p1	W06H8.1a,W06H8.1b,W06H8.1d,W06H8.1e,W06H8.1g,W06H8.1c,W06H8.1h,W06H8.1f,W06H8.1i	cbrenneri@@@TRINITY_DN10380_c0_g1_i1.p1,cbrenneri@@@TRINITY_DN10380_c0_g1_i5.p1	cbriggsae@@@TRINITY_DN670_c0_g1_i5.p1,cbriggsae@@@TRINITY_DN670_c0_g1_i3.p1,cbriggsae@@@TRINITY_DN670_c0_g1_i7.p1,cbriggsae@@@TRINITY_DN670_c0_g1_i1.p1,cbriggsae@@@TRINITY_DN670_c0_g1_i6.p1	celegans@@@TRINITY_DN1776_c0_g1_i5.p1,celegans@@@TRINITY_DN1776_c0_g1_i1.p1,celegans@@@TRINITY_DN1776_c0_g1_i3.p1	celegans@@@TRINITY_GG_7026_c1_g1_i2.p1	cinopinata@@@TRINITY_DN1515_c0_g1_i1.p1,cinopinata@@@TRINITY_DN1515_c0_g1_i2.p1	cjaponica@@@TRINITY_DN4801_c0_g1_i5.p1,cjaponica@@@TRINITY_DN4801_c0_g1_i4.p1,cjaponica@@@TRINITY_DN4801_c0_g1_i1.p1,cjaponica@@@TRINITY_DN4801_c0_g1_i3.p1	cremanei@@@TRINITY_DN3086_c0_g1_i10.p1,cremanei@@@TRINITY_DN3086_c0_g1_i11.p1,cremanei@@@TRINITY_DN3086_c0_g1_i4.p1,cremanei@@@TRINITY_DN3086_c0_g1_i8.p1	ppacificus@@@TRINITY_DN16217_c1_g1_i2.p1
15	14	55	0.334	CEW1@@@TRINITY_DN3021_c0_g1_i3.p1,CEW1@@@TRINITY_DN3021_c0_g1_i2.p1,CEW1@@@TRINITY_DN3021_c0_g1_i10.p1	DF5006@@@TRINITY_DN27_c0_g1_i2.p1,DF5006@@@TRINITY_DN27_c0_g1_i6.p1,DF5006@@@TRINITY_DN27_c0_g1_i7.p1	DF5012@@@TRINITY_DN422_c0_g1_i4.p1,DF5012@@@TRINITY_DN422_c0_g1_i6.p1,DF5012@@@TRINITY_DN422_c0_g1_i7.p1,DF5012@@@TRINITY_DN422_c0_g1_i5.p1,DF5012@@@TRINITY_DN422_c0_g1_i1.p1,DF5012@@@TRINITY_DN422_c0_g1_i8.p1	DF5112@@@TRINITY_DN11_c0_g1_i3.p1,DF5112@@@TRINITY_DN11_c0_g1_i4.p1,DF5112@@@TRINITY_DN11_c0_g1_i5.p1,DF5112@@@TRINITY_DN11_c0_g1_i6.p1,DF5112@@@TRINITY_DN11_c0_g1_i8.p1,DF5112@@@TRINITY_DN11_c0_g1_i9.p1	MT8872@@@TRINITY_DN229_c0_g1_i1.p1,MT8872@@@TRINITY_DN229_c0_g1_i4.p1,MT8872@@@TRINITY_DN229_c0_g1_i6.p1	ZK637.8a,ZK637.8c,ZK637.8f,ZK637.8e,ZK637.8d,ZK637.8b	cbrenneri@@@TRINITY_DN1168_c0_g3_i1.p1,cbrenneri@@@TRINITY_DN1168_c0_g3_i2.p1,cbrenneri@@@TRINITY_DN1168_c0_g3_i4.p1	cbriggsae@@@TRINITY_DN533_c0_g2_i6.p1,cbriggsae@@@TRINITY_DN533_c0_g2_i4.p1,cbriggsae@@@TRINITY_DN533_c0_g2_i3.p1,cbriggsae@@@TRINITY_DN533_c0_g2_i2.p1	celegans@@@TRINITY_DN679_c0_g1_i4.p1,celegans@@@TRINITY_DN679_c0_g1_i2.p1,celegans@@@TRINITY_DN679_c0_g1_i5.p1	celegans@@@TRINITY_GG_9010_c0_g1_i1.p1,celegans@@@TRINITY_GG_9010_c0_g1_i2.p1	cinopinata@@@TRINITY_DN9035_c0_g1_i7.p1,cinopinata@@@TRINITY_DN9035_c0_g1_i8.p1,cinopinata@@@TRINITY_DN9035_c0_g1_i6.p1,cinopinata@@@TRINITY_DN9035_c0_g1_i5.p1,cinopinata@@@TRINITY_DN9035_c0_g1_i3.p1,cinopinata@@@TRINITY_DN9035_c0_g1_i2.p1	cjaponica@@@TRINITY_DN65_c1_g1_i3.p1,cjaponica@@@TRINITY_DN65_c1_g1_i4.p1,cjaponica@@@TRINITY_DN65_c1_g1_i1.p1,cjaponica@@@TRINITY_DN65_c1_g1_i5.p1	cremanei@@@TRINITY_DN453_c0_g1_i3.p1,cremanei@@@TRINITY_DN453_c0_g1_i1.p1	ppacificus@@@TRINITY_DN177_c0_g2_i2.p1,ppacificus@@@TRINITY_DN177_c0_g2_i3.p1,ppacificus@@@TRINITY_DN177_c0_g2_i1.p1,ppacificus@@@TRINITY_DN177_c0_g2_i6.p1
16	14	55	0.306	CEW1@@@TRINITY_DN207_c0_g1_i1.p1,CEW1@@@TRINITY_DN207_c0_g1_i2.p1,CEW1@@@TRINITY_DN207_c0_g1_i4.p1,CEW1@@@TRINITY_DN207_c0_g1_i5.p1	DF5006@@@TRINITY_DN7071_c0_g1_i2.p1,DF5006@@@TRINITY_DN7071_c0_g1_i4.p1,DF5006@@@TRINITY_DN7071_c0_g1_i5.p1,DF5006@@@TRINITY_DN7071_c0_g1_i6.p1,DF5006@@@TRINITY_DN7071_c0_g1_i7.p1	DF5012@@@TRINITY_DN666_c0_g1_i2.p1,DF5012@@@TRINITY_DN666_c0_g1_i3.p1,DF5012@@@TRINITY_DN666_c0_g1_i4.p1,DF5012@@@TRINITY_DN666_c0_g1_i5.p1	DF5112@@@TRINITY_DN838_c0_g1_i3.p1,DF5112@@@TRINITY_DN838_c0_g1_i4.p1,DF5112@@@TRINITY_DN838_c0_g1_i2.p1	MT8872@@@TRINITY_DN679_c0_g1_i2.p1,MT8872@@@TRINITY_DN679_c0_g1_i6.p1	K04F10.4b,K04F10.4h,K04F10.4j,K04F10.4a,K04F10.4e,K04F10.4f,K04F10.4i,K04F10.4g	cbrenneri@@@TRINITY_DN654_c0_g1_i4.p1,cbrenneri@@@TRINITY_DN654_c0_g1_i6.p1	cbriggsae@@@TRINITY_DN652_c0_g1_i4.p1,cbriggsae@@@TRINITY_DN652_c0_g1_i5.p1,cbriggsae@@@TRINITY_DN652_c0_g1_i6.p1,cbriggsae@@@TRINITY_DN652_c0_g1_i3.p1	celegans@@@TRINITY_DN161_c0_g1_i1.p1,celegans@@@TRINITY_DN161_c0_g1_i2.p1,celegans@@@TRINITY_DN161_c0_g1_i3.p1,celegans@@@TRINITY_DN161_c0_g1_i11.p1,celegans@@@TRINITY_DN161_c0_g1_i8.p1,celegans@@@TRINITY_DN161_c0_g1_i9.p1,celegans@@@TRINITY_DN161_c0_g1_i7.p1	celegans@@@TRINITY_GG_11255_c0_g1_i3.p1	cinopinata@@@TRINITY_DN457_c0_g1_i1.p1,cinopinata@@@TRINITY_DN457_c0_g1_i3.p1,cinopinata@@@TRINITY_DN457_c0_g1_i2.p1,cinopinata@@@TRINITY_DN457_c0_g1_i5.p1	cjaponica@@@TRINITY_DN2247_c0_g1_i7.p1,cjaponica@@@TRINITY_DN2247_c0_g1_i5.p1,cjaponica@@@TRINITY_DN2247_c0_g1_i6.p1,cjaponica@@@TRINITY_DN2247_c0_g1_i4.p1	cremanei@@@TRINITY_DN2715_c0_g1_i11.p1,cremanei@@@TRINITY_DN2715_c0_g1_i8.p1,cremanei@@@TRINITY_DN2715_c0_g1_i4.p1	ppacificus@@@TRINITY_DN7586_c0_g2_i1.p1,ppacificus@@@TRINITY_DN7586_c0_g2_i2.p1,ppacificus@@@TRINITY_DN7586_c0_g2_i4.p1,ppacificus@@@TRINITY_DN7586_c0_g2_i7.p1
17	14	55	0.249	CEW1@@@TRINITY_DN1311_c0_g1_i10.p1,CEW1@@@TRINITY_DN1311_c0_g1_i11.p1,CEW1@@@TRINITY_DN1311_c0_g1_i2.p1,CEW1@@@TRINITY_DN1311_c0_g1_i4.p1,CEW1@@@TRINITY_DN1311_c0_g1_i6.p1,CEW1@@@TRINITY_DN1311_c0_g1_i7.p1,CEW1@@@TRINITY_DN1311_c0_g1_i8.p1,CEW1@@@TRINITY_DN1311_c0_g1_i9.p1,CEW1@@@TRINITY_DN1311_c0_g1_i1.p1,CEW1@@@TRINITY_DN1311_c0_g1_i12.p1,CEW1@@@TRINITY_DN1311_c0_g1_i3.p1,CEW1@@@TRINITY_DN1311_…	DF5006@@@TRINITY_DN3499_c0_g1_i1.p1,DF5006@@@TRINITY_DN3499_c0_g1_i3.p1,DF5006@@@TRINITY_DN3499_c0_g1_i4.p1	DF5012@@@TRINITY_DN2540_c0_g1_i2.p1,DF5012@@@TRINITY_DN2540_c0_g1_i1.p1,DF5012@@@TRINITY_DN2540_c0_g1_i3.p1,DF5012@@@TRINITY_DN2540_c0_g1_i4.p1,DF5012@@@TRINITY_DN2540_c0_g1_i5.p1	DF5112@@@TRINITY_DN483_c0_g2_i1.p1,DF5112@@@TRINITY_DN483_c0_g2_i4.p1,DF5112@@@TRINITY_DN483_c0_g2_i2.p1,DF5112@@@TRINITY_DN483_c0_g2_i3.p1	MT8872@@@TRINITY_DN1474_c0_g1_i1.p1,MT8872@@@TRINITY_DN1474_c0_g1_i2.p1	T14G10.2a,T14G10.2b,T14G10.2d,T14G10.2e,T14G10.2f,T14G10.2g	cbrenneri@@@TRINITY_DN2562_c0_g1_i2.p1,cbrenneri@@@TRINITY_DN2562_c0_g1_i3.p1,cbrenneri@@@TRINITY_DN2562_c0_g1_i1.p1	cbriggsae@@@TRINITY_DN1503_c0_g1_i1.p1,cbriggsae@@@TRINITY_DN1503_c0_g1_i2.p1,cbriggsae@@@TRINITY_DN1503_c0_g1_i3.p1	celegans@@@TRINITY_DN7632_c0_g1_i1.p1	celegans@@@TRINITY_GG_14459_c0_g1_i1.p1	cinopinata@@@TRINITY_DN2220_c0_g1_i5.p1,cinopinata@@@TRINITY_DN2220_c0_g1_i6.p1,cinopinata@@@TRINITY_DN2220_c0_g1_i2.p1	cjaponica@@@TRINITY_DN12497_c0_g1_i1.p1	cremanei@@@TRINITY_DN3476_c0_g1_i1.p1,cremanei@@@TRINITY_DN3476_c0_g1_i2.p1,cremanei@@@TRINITY_DN3476_c0_g1_i4.p1	ppacificus@@@TRINITY_DN641_c0_g1_i2.p1,ppacificus@@@TRINITY_DN641_c0_g1_i3.p1,ppacificus@@@TRINITY_DN641_c0_g1_i4.p1,ppacificus@@@TRINITY_DN641_c0_g1_i6.p1,ppacificus@@@TRINITY_DN641_c0_g1_i7.p1,ppacificus@@@TRINITY_DN641_c0_g1_i8.p1,ppacificus@@@TRINITY_DN641_c0_g1_i9.p1,ppacificus@@@TRINITY_DN641_c0_g1_i5.p1
18	14	53	0.124	CEW1@@@TRINITY_DN179_c0_g1_i1.p1,CEW1@@@TRINITY_DN179_c0_g1_i2.p1	DF5006@@@TRINITY_DN2211_c0_g1_i4.p1,DF5006@@@TRINITY_DN2211_c0_g1_i7.p1,DF5006@@@TRINITY_DN2211_c0_g1_i8.p1,DF5006@@@TRINITY_DN2211_c0_g1_i5.p1,DF5006@@@TRINITY_DN2211_c0_g1_i6.p1	DF5012@@@TRINITY_DN795_c0_g1_i4.p1,DF5012@@@TRINITY_DN795_c0_g1_i6.p1,DF5012@@@TRINITY_DN795_c0_g1_i1.p1,DF5012@@@TRINITY_DN795_c0_g1_i3.p1,DF5012@@@TRINITY_DN795_c0_g1_i5.p1	DF5112@@@TRINITY_DN725_c0_g1_i1.p1,DF5112@@@TRINITY_DN725_c0_g1_i4.p1,DF5112@@@TRINITY_DN725_c0_g1_i6.p1,DF5112@@@TRINITY_DN725_c0_g1_i3.p1,DF5112@@@TRINITY_DN725_c0_g1_i5.p1,DF5112@@@TRINITY_DN725_c0_g1_i2.p1	MT8872@@@TRINITY_DN661_c0_g1_i1.p1,MT8872@@@TRINITY_DN661_c0_g1_i3.p1,MT8872@@@TRINITY_DN661_c0_g1_i2.p1	C17G10.4a,C17G10.4d,C17G10.4c,C17G10.4e,C17G10.4h,C17G10.4g	cbrenneri@@@TRINITY_DN665_c0_g1_i2.p1,cbrenneri@@@TRINITY_DN665_c0_g1_i4.p1,cbrenneri@@@TRINITY_DN665_c0_g1_i1.p1,cbrenneri@@@TRINITY_DN665_c0_g1_i3.p1	cbriggsae@@@TRINITY_DN928_c0_g1_i3.p1,cbriggsae@@@TRINITY_DN928_c0_g1_i1.p1,cbriggsae@@@TRINITY_DN928_c0_g1_i2.p1,cbriggsae@@@TRINITY_DN928_c0_g1_i4.p1	celegans@@@TRINITY_DN7996_c0_g4_i1.p1,celegans@@@TRINITY_DN7996_c0_g4_i2.p1	celegans@@@TRINITY_GG_12302_c0_g1_i3.p1,celegans@@@TRINITY_GG_12302_c0_g1_i4.p1,celegans@@@TRINITY_GG_12302_c0_g1_i5.p1	cinopinata@@@TRINITY_DN249_c0_g1_i3.p1,cinopinata@@@TRINITY_DN249_c0_g1_i4.p1,cinopinata@@@TRINITY_DN249_c0_g1_i2.p1,cinopinata@@@TRINITY_DN249_c0_g1_i1.p1	cjaponica@@@TRINITY_DN2187_c3_g2_i1.p1,cjaponica@@@TRINITY_DN2187_c3_g2_i2.p1,cjaponica@@@TRINITY_DN2187_c3_g2_i3.p1	cremanei@@@TRINITY_DN3021_c0_g1_i2.p1,cremanei@@@TRINITY_DN3021_c0_g1_i1.p1,cremanei@@@TRINITY_DN3021_c0_g1_i4.p1,cremanei@@@TRINITY_DN3021_c0_g1_i3.p1	ppacificus@@@TRINITY_DN596_c0_g1_i1.p1,ppacificus@@@TRINITY_DN596_c0_g1_i2.p1
19	14	53	0.105	CEW1@@@TRINITY_DN721_c0_g1_i2.p1,CEW1@@@TRINITY_DN721_c0_g1_i3.p1,CEW1@@@TRINITY_DN721_c0_g1_i8.p1,CEW1@@@TRINITY_DN721_c0_g1_i9.p1,CEW1@@@TRINITY_DN721_c0_g1_i1.p1,CEW1@@@TRINITY_DN721_c0_g1_i4.p1	DF5006@@@TRINITY_DN712_c0_g1_i1.p1,DF5006@@@TRINITY_DN712_c0_g1_i2.p1	DF5012@@@TRINITY_DN670_c0_g1_i2.p1,DF5012@@@TRINITY_DN670_c0_g1_i1.p1,DF5012@@@TRINITY_DN670_c0_g1_i3.p1,DF5012@@@TRINITY_DN670_c0_g1_i4.p1	DF5112@@@TRINITY_DN5752_c0_g1_i1.p1	MT8872@@@TRINITY_DN612_c0_g1_i1.p1,MT8872@@@TRINITY_DN612_c0_g1_i2.p1	F22D3.1d,F22D3.1e,F22D3.1j,F22D3.1b,F22D3.1f,F22D3.1h,F22D3.1a,F22D3.1m,F22D3.1l,F22D3.1p,F22D3.1c,F22D3.1k,F22D3.1g,F22D3.1n,F22D3.1i,F22D3.1o	cbrenneri@@@TRINITY_DN20511_c0_g1_i5.p1,cbrenneri@@@TRINITY_DN20511_c0_g1_i8.p1,cbrenneri@@@TRINITY_DN20511_c0_g1_i4.p1,cbrenneri@@@TRINITY_DN20511_c0_g1_i9.p1	cbriggsae@@@TRINITY_DN839_c0_g1_i1.p1,cbriggsae@@@TRINITY_DN839_c0_g1_i2.p1	celegans@@@TRINITY_DN317_c0_g2_i1.p1,celegans@@@TRINITY_DN317_c0_g2_i2.p1,celegans@@@TRINITY_DN317_c0_g2_i3.p1	celegans@@@TRINITY_GG_259_c0_g1_i1.p1,celegans@@@TRINITY_GG_259_c0_g1_i3.p1,celegans@@@TRINITY_GG_259_c0_g1_i2.p1	cinopinata@@@TRINITY_DN3573_c0_g1_i1.p1,cinopinata@@@TRINITY_DN3573_c0_g1_i2.p1	cjaponica@@@TRINITY_DN2756_c0_g1_i3.p1,cjaponica@@@TRINITY_DN2756_c0_g1_i5.p1	cremanei@@@TRINITY_DN1206_c0_g1_i1.p1,cremanei@@@TRINITY_DN1206_c0_g1_i4.p1,cremanei@@@TRINITY_DN1206_c0_g1_i5.p1,cremanei@@@TRINITY_DN1206_c0_g1_i3.p1,cremanei@@@TRINITY_DN1206_c0_g1_i6.p1	ppacificus@@@TRINITY_DN27119_c0_g1_i1.p1
20	14	52	0.352	CEW1@@@TRINITY_DN624_c0_g1_i3.p1,CEW1@@@TRINITY_DN624_c0_g1_i2.p1,CEW1@@@TRINITY_DN624_c0_g1_i4.p1,CEW1@@@TRINITY_DN624_c0_g1_i7.p1,CEW1@@@TRINITY_DN624_c0_g1_i5.p1,CEW1@@@TRINITY_DN624_c0_g1_i6.p1,CEW1@@@TRINITY_DN624_c0_g1_i1.p1	DF5006@@@TRINITY_DN972_c0_g1_i2.p1,DF5006@@@TRINITY_DN972_c0_g1_i5.p1,DF5006@@@TRINITY_DN972_c0_g1_i1.p1,DF5006@@@TRINITY_DN972_c0_g1_i10.p1,DF5006@@@TRINITY_DN972_c0_g1_i6.p1,DF5006@@@TRINITY_DN972_c0_g1_i11.p1	DF5012@@@TRINITY_DN566_c0_g1_i5.p1,DF5012@@@TRINITY_DN566_c0_g1_i1.p1,DF5012@@@TRINITY_DN566_c0_g1_i7.p1,DF5012@@@TRINITY_DN566_c0_g1_i8.p1	DF5112@@@TRINITY_DN33_c0_g1_i1.p1,DF5112@@@TRINITY_DN33_c0_g1_i3.p1,DF5112@@@TRINITY_DN33_c0_g1_i5.p1,DF5112@@@TRINITY_DN33_c0_g1_i7.p1,DF5112@@@TRINITY_DN33_c0_g1_i10.p1,DF5112@@@TRINITY_DN33_c0_g1_i2.p1,DF5112@@@TRINITY_DN33_c0_g1_i9.p1,DF5112@@@TRINITY_DN33_c0_g1_i6.p1	MT8872@@@TRINITY_DN1098_c0_g1_i1.p1	C32E8.10a,C32E8.10e,C32E8.10c,C32E8.10d,C32E8.10b,C32E8.10h	cbrenneri@@@TRINITY_DN266_c0_g1_i2.p1,cbrenneri@@@TRINITY_DN266_c0_g1_i7.p1,cbrenneri@@@TRINITY_DN266_c0_g1_i5.p1	cbriggsae@@@TRINITY_DN1861_c1_g2_i3.p1	celegans@@@TRINITY_DN1153_c0_g1_i4.p1,celegans@@@TRINITY_DN1153_c0_g1_i3.p1,celegans@@@TRINITY_DN1153_c0_g1_i1.p1	celegans@@@TRINITY_GG_21707_c0_g1_i2.p1,celegans@@@TRINITY_GG_21707_c0_g1_i1.p1	cinopinata@@@TRINITY_DN244_c0_g1_i2.p1,cinopinata@@@TRINITY_DN244_c0_g1_i4.p1,cinopinata@@@TRINITY_DN244_c0_g1_i1.p1,cinopinata@@@TRINITY_DN244_c0_g1_i6.p1	cjaponica@@@TRINITY_DN2643_c0_g1_i3.p1,cjaponica@@@TRINITY_DN2643_c0_g1_i4.p1,cjaponica@@@TRINITY_DN2643_c0_g1_i1.p1	cremanei@@@TRINITY_DN321_c0_g1_i2.p1,cremanei@@@TRINITY_DN321_c0_g1_i4.p1	ppacificus@@@TRINITY_DN20_c0_g1_i9.p1,ppacificus@@@TRINITY_DN20_c0_g1_i5.p1
21	14	52	0.256	CEW1@@@TRINITY_DN3476_c0_g1_i2.p1,CEW1@@@TRINITY_DN3476_c0_g1_i4.p1,CEW1@@@TRINITY_DN3476_c0_g1_i7.p1,CEW1@@@TRINITY_DN3476_c0_g1_i8.p1,CEW1@@@TRINITY_DN3476_c0_g1_i9.p1	DF5006@@@TRINITY_DN2616_c0_g1_i3.p1,DF5006@@@TRINITY_DN2616_c0_g1_i7.p1,DF5006@@@TRINITY_DN2616_c0_g1_i4.p1,DF5006@@@TRINITY_DN2616_c0_g1_i6.p1,DF5006@@@TRINITY_DN2616_c0_g1_i2.p1	DF5012@@@TRINITY_DN9111_c0_g2_i4.p1,DF5012@@@TRINITY_DN9111_c0_g2_i7.p1	DF5112@@@TRINITY_DN1228_c0_g1_i5.p1,DF5112@@@TRINITY_DN1228_c0_g1_i10.p1	MT8872@@@TRINITY_DN20607_c0_g1_i1.p1	ZC518.1f,ZC518.1a,ZC518.1e,ZC518.1c,ZC518.1b,ZC518.1d	cbrenneri@@@TRINITY_DN3654_c0_g1_i2.p1,cbrenneri@@@TRINITY_DN3654_c0_g1_i15.p1,cbrenneri@@@TRINITY_DN3654_c0_g1_i8.p1,cbrenneri@@@TRINITY_DN3654_c0_g1_i5.p1,cbrenneri@@@TRINITY_DN3654_c0_g1_i3.p1	cbriggsae@@@TRINITY_DN2286_c0_g1_i6.p1,cbriggsae@@@TRINITY_DN2286_c0_g1_i4.p1,cbriggsae@@@TRINITY_DN2286_c0_g1_i1.p1,cbriggsae@@@TRINITY_DN2286_c0_g1_i5.p1	celegans@@@TRINITY_DN3286_c0_g1_i3.p1,celegans@@@TRINITY_DN3286_c0_g1_i8.p1,celegans@@@TRINITY_DN3286_c0_g1_i5.p1,celegans@@@TRINITY_DN3286_c0_g1_i7.p1	celegans@@@TRINITY_GG_3241_c0_g1_i8.p1,celegans@@@TRINITY_GG_3241_c0_g1_i6.p1,celegans@@@TRINITY_GG_3241_c0_g1_i1.p1,celegans@@@TRINITY_GG_3241_c0_g1_i3.p1	cinopinata@@@TRINITY_DN2408_c0_g1_i5.p1,cinopinata@@@TRINITY_DN2408_c0_g1_i6.p1,cinopinata@@@TRINITY_DN2408_c0_g1_i1.p1,cinopinata@@@TRINITY_DN2408_c0_g1_i2.p1	cjaponica@@@TRINITY_DN4001_c0_g1_i6.p1,cjaponica@@@TRINITY_DN4001_c0_g1_i2.p1,cjaponica@@@TRINITY_DN4001_c0_g1_i8.p1	cremanei@@@TRINITY_DN5164_c0_g1_i5.p1,cremanei@@@TRINITY_DN5164_c0_g1_i10.p1,cremanei@@@TRINITY_DN5164_c0_g1_i9.p1,cremanei@@@TRINITY_DN5164_c0_g1_i13.p1	ppacificus@@@TRINITY_DN1847_c0_g2_i1.p1,ppacificus@@@TRINITY_DN1847_c0_g2_i4.p1,ppacificus@@@TRINITY_DN1847_c0_g2_i11.p1
22	14	51	0.632	CEW1@@@TRINITY_DN244_c0_g1_i1.p1,CEW1@@@TRINITY_DN244_c0_g1_i2.p1,CEW1@@@TRINITY_DN244_c0_g1_i3.p1,CEW1@@@TRINITY_DN244_c0_g1_i4.p1	DF5006@@@TRINITY_DN1646_c0_g1_i2.p1,DF5006@@@TRINITY_DN1646_c0_g1_i3.p1	DF5012@@@TRINITY_DN1129_c0_g2_i1.p1,DF5012@@@TRINITY_DN1129_c0_g2_i2.p1,DF5012@@@TRINITY_DN1129_c0_g2_i3.p1,DF5012@@@TRINITY_DN1129_c0_g2_i4.p1	DF5112@@@TRINITY_DN638_c0_g1_i1.p1,DF5112@@@TRINITY_DN638_c0_g1_i2.p1,DF5112@@@TRINITY_DN638_c0_g1_i3.p1	MT8872@@@TRINITY_DN1941_c0_g2_i1.p1,MT8872@@@TRINITY_DN1941_c0_g2_i2.p1	Y47H9C.4a,Y47H9C.4b,Y47H9C.4c	cbrenneri@@@TRINITY_DN844_c0_g1_i1.p1,cbrenneri@@@TRINITY_DN844_c0_g1_i2.p1,cbrenneri@@@TRINITY_DN844_c0_g1_i3.p1,cbrenneri@@@TRINITY_DN844_c0_g1_i4.p1	cbriggsae@@@TRINITY_DN5130_c1_g2_i3.p1,cbriggsae@@@TRINITY_DN5130_c1_g2_i4.p1,cbriggsae@@@TRINITY_DN5130_c1_g2_i5.p1	celegans@@@TRINITY_DN13037_c0_g1_i2.p1,celegans@@@TRINITY_DN13037_c0_g1_i3.p1	celegans@@@TRINITY_GG_21693_c0_g1_i2.p1,celegans@@@TRINITY_GG_21693_c0_g1_i1.p1,celegans@@@TRINITY_GG_21693_c0_g1_i3.p1	cinopinata@@@TRINITY_DN592_c0_g1_i1.p1,cinopinata@@@TRINITY_DN592_c0_g1_i2.p1,cinopinata@@@TRINITY_DN592_c0_g1_i3.p1,cinopinata@@@TRINITY_DN592_c0_g1_i5.p1,cinopinata@@@TRINITY_DN592_c0_g1_i6.p1	cjaponica@@@TRINITY_DN5190_c0_g1_i1.p1,cjaponica@@@TRINITY_DN5190_c0_g1_i2.p1,cjaponica@@@TRINITY_DN5190_c0_g1_i3.p1,cjaponica@@@TRINITY_DN5190_c0_g1_i4.p1,cjaponica@@@TRINITY_DN5190_c0_g1_i6.p1	cremanei@@@TRINITY_DN3020_c0_g1_i1.p1,cremanei@@@TRINITY_DN3020_c0_g1_i10.p1,cremanei@@@TRINITY_DN3020_c0_g1_i12.p1,cremanei@@@TRINITY_DN3020_c0_g1_i13.p1,cremanei@@@TRINITY_DN3020_c0_g1_i3.p1,cremanei@@@TRINITY_DN3020_c0_g1_i5.p1,cremanei@@@TRINITY_DN3020_c0_g1_i6.p1,cremanei@@@TRINITY_DN3020_c0_g1_i7.p1	ppacificus@@@TRINITY_DN372_c0_g1_i1.p1,ppacificus@@@TRINITY_DN372_c0_g1_i2.p1,ppacificus@@@TRINITY_DN372_c0_g1_i3.p1
23	14	51	0.561	CEW1@@@TRINITY_DN802_c0_g1_i2.p1	DF5006@@@TRINITY_DN1098_c0_g1_i1.p1,DF5006@@@TRINITY_DN1098_c0_g1_i2.p1	DF5012@@@TRINITY_DN1011_c0_g1_i1.p1,DF5012@@@TRINITY_DN1011_c0_g1_i2.p1,DF5012@@@TRINITY_DN1011_c0_g1_i3.p1,DF5012@@@TRINITY_DN1011_c0_g1_i4.p1,DF5012@@@TRINITY_DN1011_c0_g1_i5.p1	DF5112@@@TRINITY_DN113_c2_g1_i1.p1,DF5112@@@TRINITY_DN113_c2_g1_i2.p1	MT8872@@@TRINITY_DN1428_c0_g1_i2.p1	T12G3.2b,T12G3.2f,T12G3.2d,T12G3.2a,T12G3.2c	cbrenneri@@@TRINITY_DN9072_c0_g1_i1.p1,cbrenneri@@@TRINITY_DN9072_c0_g1_i4.p1,cbrenneri@@@TRINITY_DN9072_c0_g1_i5.p1	cbriggsae@@@TRINITY_DN4478_c0_g1_i2.p1	celegans@@@TRINITY_DN251_c0_g1_i4.p1,celegans@@@TRINITY_DN251_c0_g1_i8.p1,celegans@@@TRINITY_DN251_c0_g1_i2.p1,celegans@@@TRINITY_DN251_c0_g1_i1.p1,celegans@@@TRINITY_DN251_c0_g1_i5.p1,celegans@@@TRINITY_DN251_c0_g1_i7.p1,celegans@@@TRINITY_DN251_c0_g1_i9.p1,celegans@@@TRINITY_DN251_c0_g1_i3.p1,celegans@@@TRINITY_DN251_c0_g1_i6.p1	celegans@@@TRINITY_GG_14973_c0_g1_i6.p1,celegans@@@TRINITY_GG_14973_c0_g1_i9.p1,celegans@@@TRINITY_GG_14973_c0_g1_i1.p1,celegans@@@TRINITY_GG_14973_c0_g1_i3.p1,celegans@@@TRINITY_GG_14973_c0_g1_i4.p1,celegans@@@TRINITY_GG_14973_c0_g1_i7.p1,celegans@@@TRINITY_GG_14973_c0_g1_i2.p1,celegans@@@TRINITY_GG_14973_c0_g1_i5.p1,celegans@@@TRINITY_GG_14973_c0_g1_i8.p1	cinopinata@@@TRINITY_DN849_c0_g1_i2.p1,cinopinata@@@TRINITY_DN849_c0_g1_i3.p1	cjaponica@@@TRINITY_DN1124_c0_g1_i1.p1,cjaponica@@@TRINITY_DN1124_c0_g1_i2.p1,cjaponica@@@TRINITY_DN1124_c0_g1_i3.p1,cjaponica@@@TRINITY_DN1124_c0_g1_i4.p1,cjaponica@@@TRINITY_DN1124_c0_g1_i7.p1	cremanei@@@TRINITY_DN3720_c0_g1_i1.p1,cremanei@@@TRINITY_DN3720_c0_g1_i2.p1,cremanei@@@TRINITY_DN3720_c0_g1_i3.p1,cremanei@@@TRINITY_DN3720_c0_g1_i4.p1	ppacificus@@@TRINITY_DN908_c0_g1_i1.p1,ppacificus@@@TRINITY_DN908_c0_g1_i3.p1
24	14	51	0.542	CEW1@@@TRINITY_DN311_c0_g1_i4.p1,CEW1@@@TRINITY_DN311_c0_g1_i1.p1	DF5006@@@TRINITY_DN24_c0_g1_i2.p1,DF5006@@@TRINITY_DN24_c0_g1_i3.p1,DF5006@@@TRINITY_DN24_c0_g1_i5.p1,DF5006@@@TRINITY_DN24_c0_g1_i1.p1	DF5012@@@TRINITY_DN358_c0_g1_i1.p1,DF5012@@@TRINITY_DN358_c0_g1_i2.p1,DF5012@@@TRINITY_DN358_c0_g1_i3.p1,DF5012@@@TRINITY_DN358_c0_g1_i4.p1	DF5112@@@TRINITY_DN4618_c0_g1_i4.p1,DF5112@@@TRINITY_DN4618_c0_g1_i10.p1	MT8872@@@TRINITY_DN1089_c0_g1_i3.p1,MT8872@@@TRINITY_DN1089_c0_g1_i5.p1	K11C4.3d,K11C4.3b,K11C4.3a,K11C4.3c	cbrenneri@@@TRINITY_DN310_c0_g1_i13.p1,cbrenneri@@@TRINITY_DN310_c0_g1_i11.p1,cbrenneri@@@TRINITY_DN310_c0_g1_i12.p1,cbrenneri@@@TRINITY_DN310_c0_g1_i8.p1,cbrenneri@@@TRINITY_DN310_c0_g1_i3.p1,cbrenneri@@@TRINITY_DN310_c0_g1_i5.p1	cbriggsae@@@TRINITY_DN230_c0_g1_i7.p1,cbriggsae@@@TRINITY_DN230_c0_g1_i2.p1,cbriggsae@@@TRINITY_DN230_c0_g1_i3.p1,cbriggsae@@@TRINITY_DN230_c0_g1_i6.p1	celegans@@@TRINITY_DN189_c0_g1_i1.p1,celegans@@@TRINITY_DN189_c0_g1_i2.p1,celegans@@@TRINITY_DN189_c0_g1_i5.p1,celegans@@@TRINITY_DN189_c0_g1_i7.p1	celegans@@@TRINITY_GG_6248_c0_g1_i1.p1,celegans@@@TRINITY_GG_6248_c0_g1_i2.p1	cinopinata@@@TRINITY_DN404_c0_g1_i10.p1,cinopinata@@@TRINITY_DN404_c0_g1_i3.p1,cinopinata@@@TRINITY_DN404_c0_g1_i6.p1,cinopinata@@@TRINITY_DN404_c0_g1_i8.p1	cjaponica@@@TRINITY_DN1160_c1_g1_i7.p1,cjaponica@@@TRINITY_DN1160_c1_g1_i5.p1,cjaponica@@@TRINITY_DN1160_c1_g1_i3.p1,cjaponica@@@TRINITY_DN1160_c1_g1_i1.p1,cjaponica@@@TRINITY_DN1160_c1_g1_i2.p1,cjaponica@@@TRINITY_DN1160_c1_g1_i6.p1	cremanei@@@TRINITY_DN10226_c0_g1_i7.p1,cremanei@@@TRINITY_DN10226_c0_g1_i8.p1,cremanei@@@TRINITY_DN10226_c0_g1_i9.p1,cremanei@@@TRINITY_DN10226_c0_g1_i4.p1	ppacificus@@@TRINITY_DN1943_c0_g2_i2.p1,ppacificus@@@TRINITY_DN1943_c0_g2_i9.p1,ppacificus@@@TRINITY_DN1943_c0_g2_i8.p1
25	14	50	0.25	CEW1@@@TRINITY_DN4599_c0_g1_i1.p1,CEW1@@@TRINITY_DN4599_c0_g1_i2.p1,CEW1@@@TRINITY_DN4599_c0_g1_i3.p1	DF5006@@@TRINITY_DN6182_c0_g1_i1.p1	DF5012@@@TRINITY_DN10027_c0_g1_i1.p1	DF5112@@@TRINITY_DN2798_c0_g1_i2.p1,DF5112@@@TRINITY_DN2798_c0_g1_i3.p1,DF5112@@@TRINITY_DN2798_c0_g1_i1.p1,DF5112@@@TRINITY_DN2798_c0_g1_i4.p1	MT8872@@@TRINITY_DN6858_c0_g1_i1.p1	C41C4.5d,C41C4.5h,C41C4.5e,C41C4.5b,C41C4.5a,C41C4.5c	cbrenneri@@@TRINITY_DN6379_c0_g1_i2.p1,cbrenneri@@@TRINITY_DN6379_c0_g1_i5.p1	cbriggsae@@@TRINITY_DN3083_c0_g2_i4.p1,cbriggsae@@@TRINITY_DN3083_c0_g2_i1.p1,cbriggsae@@@TRINITY_DN3083_c0_g2_i2.p1,cbriggsae@@@TRINITY_DN3083_c0_g2_i3.p1	celegans@@@TRINITY_DN2047_c0_g1_i7.p1,celegans@@@TRINITY_DN2047_c0_g1_i4.p1,celegans@@@TRINITY_DN2047_c0_g1_i9.p1,celegans@@@TRINITY_DN2047_c0_g1_i1.p1,celegans@@@TRINITY_DN2047_c0_g1_i6.p1	celegans@@@TRINITY_GG_1731_c0_g1_i4.p1,celegans@@@TRINITY_GG_1731_c0_g1_i6.p1,celegans@@@TRINITY_GG_1731_c0_g1_i5.p1,celegans@@@TRINITY_GG_1731_c0_g1_i1.p1,celegans@@@TRINITY_GG_1731_c0_g1_i8.p1,celegans@@@TRINITY_GG_1731_c0_g1_i3.p1	cinopinata@@@TRINITY_DN4498_c0_g1_i1.p1,cinopinata@@@TRINITY_DN4498_c0_g1_i2.p1,cinopinata@@@TRINITY_DN4498_c0_g1_i3.p1,cinopinata@@@TRINITY_DN4498_c0_g1_i6.p1	cjaponica@@@TRINITY_DN7123_c0_g2_i3.p1,cjaponica@@@TRINITY_DN7123_c0_g2_i5.p1,cjaponica@@@TRINITY_DN7123_c0_g2_i4.p1	cremanei@@@TRINITY_DN9369_c0_g1_i5.p1,cremanei@@@TRINITY_DN9369_c0_g1_i6.p1,cremanei@@@TRINITY_DN9369_c0_g1_i2.p1,cremanei@@@TRINITY_DN9369_c0_g1_i3.p1,cremanei@@@TRINITY_DN9369_c0_g1_i7.p1	ppacificus@@@TRINITY_DN21903_c0_g1_i2.p1,ppacificus@@@TRINITY_DN21903_c0_g1_i3.p1,ppacificus@@@TRINITY_DN21903_c0_g1_i6.p1,ppacificus@@@TRINITY_DN21903_c0_g1_i8.p1,ppacificus@@@TRINITY_DN21903_c0_g1_i9.p1
26	14	50	0.162	CEW1@@@TRINITY_DN267_c0_g1_i4.p1,CEW1@@@TRINITY_DN267_c0_g1_i3.p1	DF5006@@@TRINITY_DN1559_c0_g1_i4.p1,DF5006@@@TRINITY_DN1559_c0_g1_i2.p1,DF5006@@@TRINITY_DN1559_c0_g1_i1.p1,DF5006@@@TRINITY_DN1559_c0_g1_i3.p1	DF5012@@@TRINITY_DN736_c0_g1_i2.p1,DF5012@@@TRINITY_DN736_c0_g1_i3.p1,DF5012@@@TRINITY_DN736_c0_g1_i1.p1	DF5112@@@TRINITY_DN436_c0_g1_i3.p1,DF5112@@@TRINITY_DN436_c0_g1_i1.p1,DF5112@@@TRINITY_DN436_c0_g1_i2.p1	MT8872@@@TRINITY_DN469_c0_g1_i1.p1,MT8872@@@TRINITY_DN469_c0_g1_i3.p1,MT8872@@@TRINITY_DN469_c0_g1_i4.p1	T26C5.3d,T26C5.3b,T26C5.3c,T26C5.3e,T26C5.3a	cbrenneri@@@TRINITY_DN2453_c0_g1_i2.p1,cbrenneri@@@TRINITY_DN2453_c0_g1_i3.p1,cbrenneri@@@TRINITY_DN2453_c0_g1_i1.p1	cbriggsae@@@TRINITY_DN1567_c0_g1_i2.p1,cbriggsae@@@TRINITY_DN1567_c0_g1_i3.p1,cbriggsae@@@TRINITY_DN1567_c0_g1_i4.p1,cbriggsae@@@TRINITY_DN1567_c0_g1_i1.p1	celegans@@@TRINITY_DN1065_c0_g1_i2.p1,celegans@@@TRINITY_DN1065_c0_g1_i4.p1,celegans@@@TRINITY_DN1065_c0_g1_i3.p1,celegans@@@TRINITY_DN1065_c0_g1_i1.p1	celegans@@@TRINITY_GG_695_c0_g1_i1.p1,celegans@@@TRINITY_GG_695_c0_g1_i2.p1	cinopinata@@@TRINITY_DN1258_c0_g1_i6.p1,cinopinata@@@TRINITY_DN1258_c0_g1_i7.p1,cinopinata@@@TRINITY_DN1258_c0_g1_i1.p1,cinopinata@@@TRINITY_DN1258_c0_g1_i3.p1,cinopinata@@@TRINITY_DN1258_c0_g1_i2.p1	cjaponica@@@TRINITY_DN4611_c0_g1_i2.p1,cjaponica@@@TRINITY_DN4611_c0_g1_i3.p1,cjaponica@@@TRINITY_DN4611_c0_g1_i4.p1,cjaponica@@@TRINITY_DN4611_c0_g1_i1.p1	cremanei@@@TRINITY_DN2857_c0_g1_i6.p1,cremanei@@@TRINITY_DN2857_c0_g1_i7.p1,cremanei@@@TRINITY_DN2857_c0_g1_i1.p1,cremanei@@@TRINITY_DN2857_c0_g1_i2.p1,cremanei@@@TRINITY_DN2857_c0_g1_i3.p1	ppacificus@@@TRINITY_DN2481_c0_g1_i1.p1,ppacificus@@@TRINITY_DN2481_c0_g1_i3.p1,ppacificus@@@TRINITY_DN2481_c0_g1_i2.p1
27	14	50	0.156	CEW1@@@TRINITY_DN502_c0_g1_i8.p1,CEW1@@@TRINITY_DN502_c0_g1_i7.p1,CEW1@@@TRINITY_DN502_c0_g1_i4.p1,CEW1@@@TRINITY_DN502_c0_g1_i3.p1,CEW1@@@TRINITY_DN502_c0_g1_i26.p1,CEW1@@@TRINITY_DN502_c0_g1_i1.p1,CEW1@@@TRINITY_DN502_c0_g1_i22.p1,CEW1@@@TRINITY_DN502_c0_g1_i2.p1,CEW1@@@TRINITY_DN502_c0_g1_i16.p1,CEW1@@@TRINITY_DN502_c0_g1_i19.p1,CEW1@@@TRINITY_DN502_c0_g1_i23.p1,CEW1@@@TRINITY_DN502_c0_g1_i21.…	DF5006@@@TRINITY_DN793_c0_g1_i10.p1,DF5006@@@TRINITY_DN793_c0_g1_i5.p1,DF5006@@@TRINITY_DN793_c0_g1_i8.p1,DF5006@@@TRINITY_DN793_c0_g1_i9.p1,DF5006@@@TRINITY_DN793_c0_g1_i3.p1,DF5006@@@TRINITY_DN793_c0_g1_i2.p1,DF5006@@@TRINITY_DN793_c0_g1_i7.p1	DF5012@@@TRINITY_DN787_c0_g1_i2.p1,DF5012@@@TRINITY_DN787_c0_g1_i7.p1	DF5112@@@TRINITY_DN83_c0_g1_i3.p1	MT8872@@@TRINITY_DN1807_c0_g2_i2.p1,MT8872@@@TRINITY_DN1807_c0_g2_i1.p1	Y105E8A.25a,Y105E8A.25g,Y105E8A.25c	cbrenneri@@@TRINITY_DN1398_c0_g1_i1.p1,cbrenneri@@@TRINITY_DN1398_c0_g1_i2.p1,cbrenneri@@@TRINITY_DN1398_c0_g1_i5.p1,cbrenneri@@@TRINITY_DN1398_c0_g1_i9.p1	cbriggsae@@@TRINITY_DN4279_c0_g1_i5.p1,cbriggsae@@@TRINITY_DN4279_c0_g1_i3.p1	celegans@@@TRINITY_DN1148_c0_g1_i8.p1,celegans@@@TRINITY_DN1148_c0_g1_i5.p1,celegans@@@TRINITY_DN1148_c0_g1_i20.p1,celegans@@@TRINITY_DN1148_c0_g1_i19.p1,celegans@@@TRINITY_DN1148_c0_g1_i18.p1,celegans@@@TRINITY_DN1148_c0_g1_i12.p1	celegans@@@TRINITY_GG_21745_c0_g1_i1.p1,celegans@@@TRINITY_GG_21745_c0_g1_i4.p1	cinopinata@@@TRINITY_DN100_c0_g1_i1.p1,cinopinata@@@TRINITY_DN100_c0_g1_i8.p1,cinopinata@@@TRINITY_DN100_c0_g1_i9.p1	cjaponica@@@TRINITY_DN718_c0_g2_i2.p1,cjaponica@@@TRINITY_DN718_c0_g2_i4.p1	cremanei@@@TRINITY_DN3440_c0_g1_i2.p1	ppacificus@@@TRINITY_DN8716_c0_g1_i9.p1,ppacificus@@@TRINITY_DN8716_c0_g1_i11.p1,ppacificus@@@TRINITY_DN8716_c0_g1_i5.p1
28	14	49	0.3	CEW1@@@TRINITY_DN137_c0_g1_i1.p1,CEW1@@@TRINITY_DN137_c0_g1_i3.p1,CEW1@@@TRINITY_DN137_c0_g1_i4.p1,CEW1@@@TRINITY_DN137_c0_g1_i6.p1,CEW1@@@TRINITY_DN137_c0_g1_i7.p1	DF5006@@@TRINITY_DN6593_c0_g1_i1.p1,DF5006@@@TRINITY_DN6593_c0_g1_i2.p1,DF5006@@@TRINITY_DN6593_c0_g1_i3.p1	DF5012@@@TRINITY_DN805_c0_g1_i1.p1,DF5012@@@TRINITY_DN805_c0_g1_i2.p1,DF5012@@@TRINITY_DN805_c0_g1_i3.p1,DF5012@@@TRINITY_DN805_c0_g1_i4.p1	DF5112@@@TRINITY_DN887_c0_g2_i1.p1,DF5112@@@TRINITY_DN887_c0_g2_i2.p1,DF5112@@@TRINITY_DN887_c0_g2_i3.p1,DF5112@@@TRINITY_DN887_c0_g2_i5.p1	MT8872@@@TRINITY_DN321_c0_g1_i1.p1,MT8872@@@TRINITY_DN321_c0_g1_i3.p1	K08E3.5a,K08E3.5c,K08E3.5e,K08E3.5f,K08E3.5b,K08E3.5d	cbrenneri@@@TRINITY_DN141_c0_g1_i2.p1,cbrenneri@@@TRINITY_DN141_c0_g1_i3.p1,cbrenneri@@@TRINITY_DN141_c0_g1_i4.p1,cbrenneri@@@TRINITY_DN141_c0_g1_i1.p1	cbriggsae@@@TRINITY_DN65_c0_g1_i2.p1,cbriggsae@@@TRINITY_DN65_c0_g1_i3.p1	celegans@@@TRINITY_DN726_c0_g1_i3.p1,celegans@@@TRINITY_DN726_c0_g1_i5.p1,celegans@@@TRINITY_DN726_c0_g1_i2.p1	celegans@@@TRINITY_GG_20394_c0_g1_i1.p1,celegans@@@TRINITY_GG_8874_c0_g1_i1.p1,celegans@@@TRINITY_GG_8874_c0_g1_i2.p1,celegans@@@TRINITY_GG_20394_c0_g1_i2.p1	cinopinata@@@TRINITY_DN741_c0_g1_i1.p1,cinopinata@@@TRINITY_DN741_c0_g1_i2.p1	cjaponica@@@TRINITY_DN250_c0_g1_i2.p2,cjaponica@@@TRINITY_DN250_c0_g1_i3.p1,cjaponica@@@TRINITY_DN250_c0_g1_i4.p2	cremanei@@@TRINITY_DN22766_c0_g1_i7.p2,cremanei@@@TRINITY_DN22766_c0_g1_i8.p2,cremanei@@@TRINITY_DN22766_c0_g1_i3.p2	ppacificus@@@TRINITY_DN218_c0_g2_i1.p2,ppacificus@@@TRINITY_DN218_c0_g2_i2.p2,ppacificus@@@TRINITY_DN218_c0_g2_i3.p2,ppacificus@@@TRINITY_DN218_c0_g2_i4.p2
29	14	48	0.626	CEW1@@@TRINITY_DN284_c0_g1_i3.p1,CEW1@@@TRINITY_DN284_c0_g1_i4.p1,CEW1@@@TRINITY_DN284_c0_g1_i5.p1,CEW1@@@TRINITY_DN284_c0_g1_i6.p1,CEW1@@@TRINITY_DN284_c0_g1_i7.p1	DF5006@@@TRINITY_DN290_c0_g2_i3.p1,DF5006@@@TRINITY_DN290_c0_g2_i5.p1	DF5012@@@TRINITY_DN2977_c0_g1_i1.p1,DF5012@@@TRINITY_DN2977_c0_g1_i3.p1,DF5012@@@TRINITY_DN2977_c0_g1_i4.p1	DF5112@@@TRINITY_DN646_c0_g1_i1.p1,DF5112@@@TRINITY_DN646_c0_g1_i5.p1,DF5112@@@TRINITY_DN646_c0_g1_i8.p1	MT8872@@@TRINITY_DN5299_c0_g1_i1.p1	H06H21.10a,H06H21.10d,H06H21.10e,H06H21.10f,H06H21.10b,H06H21.10c	cbrenneri@@@TRINITY_DN6074_c0_g1_i1.p1,cbrenneri@@@TRINITY_DN6074_c0_g1_i2.p1,cbrenneri@@@TRINITY_DN6074_c0_g1_i3.p1	cbriggsae@@@TRINITY_DN1380_c0_g1_i3.p1,cbriggsae@@@TRINITY_DN1380_c0_g1_i4.p1	celegans@@@TRINITY_DN1190_c0_g1_i1.p1,celegans@@@TRINITY_DN1190_c0_g1_i3.p1	celegans@@@TRINITY_GG_14382_c0_g1_i1.p1,celegans@@@TRINITY_GG_14382_c0_g1_i2.p1,celegans@@@TRINITY_GG_14382_c0_g1_i3.p1	cinopinata@@@TRINITY_DN8760_c0_g1_i1.p1,cinopinata@@@TRINITY_DN8760_c0_g1_i11.p1,cinopinata@@@TRINITY_DN8760_c0_g1_i13.p1,cinopinata@@@TRINITY_DN8760_c0_g1_i14.p1,cinopinata@@@TRINITY_DN8760_c0_g1_i5.p1,cinopinata@@@TRINITY_DN8760_c0_g1_i6.p1,cinopinata@@@TRINITY_DN8760_c0_g1_i7.p1,cinopinata@@@TRINITY_DN8760_c0_g1_i8.p1	cjaponica@@@TRINITY_DN1895_c0_g1_i1.p1,cjaponica@@@TRINITY_DN1895_c0_g1_i2.p1,cjaponica@@@TRINITY_DN1895_c0_g1_i3.p1,cjaponica@@@TRINITY_DN1895_c0_g1_i4.p1,cjaponica@@@TRINITY_DN1895_c0_g1_i5.p1	cremanei@@@TRINITY_DN7220_c0_g1_i1.p1,cremanei@@@TRINITY_DN7220_c0_g1_i2.p1,cremanei@@@TRINITY_DN7220_c0_g1_i3.p1,cremanei@@@TRINITY_DN7220_c0_g1_i6.p1	ppacificus@@@TRINITY_DN18416_c0_g1_i1.p1
30	14	47	0.36	CEW1@@@TRINITY_DN1283_c0_g1_i1.p1,CEW1@@@TRINITY_DN1283_c0_g1_i2.p1,CEW1@@@TRINITY_DN1283_c0_g1_i3.p1,CEW1@@@TRINITY_DN1283_c0_g1_i4.p1	DF5006@@@TRINITY_DN1563_c0_g1_i4.p1,DF5006@@@TRINITY_DN1563_c0_g1_i6.p1,DF5006@@@TRINITY_DN1563_c0_g1_i5.p1	DF5012@@@TRINITY_DN1857_c0_g1_i1.p1,DF5012@@@TRINITY_DN1857_c0_g1_i2.p1	DF5112@@@TRINITY_DN2945_c0_g1_i2.p1	MT8872@@@TRINITY_DN1208_c0_g1_i1.p1,MT8872@@@TRINITY_DN1208_c0_g1_i2.p1	R13A5.1d,R13A5.1e,R13A5.1a,R13A5.1c,R13A5.1b	cbrenneri@@@TRINITY_DN2601_c0_g1_i1.p1,cbrenneri@@@TRINITY_DN2601_c0_g1_i4.p1	cbriggsae@@@TRINITY_DN2723_c0_g1_i3.p1,cbriggsae@@@TRINITY_DN2723_c0_g1_i5.p1,cbriggsae@@@TRINITY_DN2723_c0_g1_i1.p1,cbriggsae@@@TRINITY_DN2723_c0_g1_i7.p1	celegans@@@TRINITY_DN1433_c0_g1_i1.p1,celegans@@@TRINITY_DN1433_c0_g1_i3.p1,celegans@@@TRINITY_DN1433_c0_g1_i4.p1,celegans@@@TRINITY_DN1433_c0_g1_i2.p1	celegans@@@TRINITY_GG_8706_c0_g1_i1.p1,celegans@@@TRINITY_GG_8706_c0_g1_i2.p1	cinopinata@@@TRINITY_DN1543_c0_g1_i1.p1,cinopinata@@@TRINITY_DN1543_c0_g1_i2.p1,cinopinata@@@TRINITY_DN1543_c0_g1_i3.p1,cinopinata@@@TRINITY_DN1543_c0_g1_i4.p1	cjaponica@@@TRINITY_DN610_c2_g1_i4.p1,cjaponica@@@TRINITY_DN610_c2_g1_i1.p1,cjaponica@@@TRINITY_DN610_c2_g1_i2.p1,cjaponica@@@TRINITY_DN610_c2_g1_i3.p1	cremanei@@@TRINITY_DN7140_c0_g1_i1.p1,cremanei@@@TRINITY_DN7140_c0_g1_i2.p1,cremanei@@@TRINITY_DN7140_c0_g1_i4.p1	ppacificus@@@TRINITY_DN13815_c0_g1_i10.p1,ppacificus@@@TRINITY_DN13815_c0_g1_i14.p1,ppacificus@@@TRINITY_DN13815_c0_g1_i4.p1,ppacificus@@@TRINITY_DN13815_c0_g1_i15.p1,ppacificus@@@TRINITY_DN13815_c0_g1_i12.p1,ppacificus@@@TRINITY_DN13815_c0_g1_i6.p1,ppacificus@@@TRINITY_DN13815_c0_g1_i11.p1
31	14	47	0.227	CEW1@@@TRINITY_DN710_c0_g1_i1.p1,CEW1@@@TRINITY_DN710_c0_g1_i2.p1	DF5006@@@TRINITY_DN2331_c0_g1_i1.p1	DF5012@@@TRINITY_DN5488_c0_g1_i1.p1	DF5112@@@TRINITY_DN945_c0_g1_i1.p1,DF5112@@@TRINITY_DN945_c0_g1_i2.p1	MT8872@@@TRINITY_DN2700_c0_g1_i1.p1,MT8872@@@TRINITY_DN2700_c0_g1_i2.p1	D2030.9b,D2030.9d,D2030.9e,D2030.9a,D2030.9c	cbrenneri@@@TRINITY_DN2029_c0_g1_i1.p1,cbrenneri@@@TRINITY_DN2029_c0_g1_i10.p1,cbrenneri@@@TRINITY_DN2029_c0_g1_i7.p1,cbrenneri@@@TRINITY_DN2029_c0_g1_i8.p1,cbrenneri@@@TRINITY_DN2029_c0_g1_i9.p1	cbriggsae@@@TRINITY_DN6864_c0_g1_i3.p1,cbriggsae@@@TRINITY_DN6864_c0_g1_i8.p1,cbriggsae@@@TRINITY_DN6864_c0_g1_i1.p1,cbriggsae@@@TRINITY_DN6864_c0_g1_i5.p1	celegans@@@TRINITY_DN93_c0_g2_i2.p1,celegans@@@TRINITY_DN93_c0_g2_i3.p1,celegans@@@TRINITY_DN93_c0_g2_i6.p1,celegans@@@TRINITY_DN93_c0_g2_i1.p1,celegans@@@TRINITY_DN93_c0_g2_i4.p1,celegans@@@TRINITY_DN93_c0_g2_i5.p1	celegans@@@TRINITY_GG_9977_c0_g1_i1.p1,celegans@@@TRINITY_GG_9977_c0_g1_i2.p1,celegans@@@TRINITY_GG_9977_c0_g1_i3.p1,celegans@@@TRINITY_GG_9977_c0_g1_i4.p1	cinopinata@@@TRINITY_DN468_c0_g1_i3.p1,cinopinata@@@TRINITY_DN468_c0_g1_i4.p1,cinopinata@@@TRINITY_DN468_c0_g1_i2.p1	cjaponica@@@TRINITY_DN1289_c0_g1_i3.p1,cjaponica@@@TRINITY_DN1289_c0_g1_i6.p1,cjaponica@@@TRINITY_DN1289_c0_g1_i8.p1,cjaponica@@@TRINITY_DN1289_c0_g1_i1.p1,cjaponica@@@TRINITY_DN1289_c0_g1_i2.p1,cjaponica@@@TRINITY_DN1289_c0_g1_i4.p1,cjaponica@@@TRINITY_DN1289_c0_g1_i7.p1	cremanei@@@TRINITY_DN902_c1_g1_i1.p1,cremanei@@@TRINITY_DN902_c1_g1_i10.p1,cremanei@@@TRINITY_DN902_c1_g1_i4.p1,cremanei@@@TRINITY_DN902_c1_g1_i9.p1	ppacificus@@@TRINITY_DN23617_c0_g1_i1.p1
32	14	46	0.218	CEW1@@@TRINITY_DN278_c0_g1_i11.p1,CEW1@@@TRINITY_DN278_c0_g1_i6.p1	DF5006@@@TRINITY_DN390_c0_g1_i11.p1,DF5006@@@TRINITY_DN390_c0_g1_i3.p1,DF5006@@@TRINITY_DN390_c0_g1_i6.p1	DF5012@@@TRINITY_DN267_c0_g1_i2.p1	DF5112@@@TRINITY_DN2088_c0_g1_i13.p1,DF5112@@@TRINITY_DN2088_c0_g1_i8.p1,DF5112@@@TRINITY_DN2088_c0_g1_i9.p1,DF5112@@@TRINITY_DN2088_c0_g1_i12.p1	MT8872@@@TRINITY_DN372_c0_g1_i3.p1,MT8872@@@TRINITY_DN372_c0_g1_i4.p1,MT8872@@@TRINITY_DN372_c0_g1_i7.p1	ZK909.2a,ZK909.2l,ZK909.2h,ZK909.2f,ZK909.2g,ZK909.2m	cbrenneri@@@TRINITY_DN518_c0_g1_i3.p1,cbrenneri@@@TRINITY_DN518_c0_g1_i4.p1,cbrenneri@@@TRINITY_DN518_c0_g1_i8.p1	cbriggsae@@@TRINITY_DN10891_c0_g1_i1.p1,cbriggsae@@@TRINITY_DN10891_c0_g1_i13.p1,cbriggsae@@@TRINITY_DN10891_c0_g1_i4.p1	celegans@@@TRINITY_DN111_c0_g1_i19.p1,celegans@@@TRINITY_DN111_c0_g1_i12.p1,celegans@@@TRINITY_DN111_c0_g1_i14.p1,celegans@@@TRINITY_DN111_c0_g1_i10.p1,celegans@@@TRINITY_DN111_c0_g1_i18.p1,celegans@@@TRINITY_DN111_c0_g1_i4.p1	celegans@@@TRINITY_GG_9787_c0_g1_i4.p1	cinopinata@@@TRINITY_DN5706_c0_g1_i6.p1,cinopinata@@@TRINITY_DN5706_c0_g1_i10.p1,cinopinata@@@TRINITY_DN5706_c0_g1_i3.p1,cinopinata@@@TRINITY_DN5706_c0_g1_i9.p1	cjaponica@@@TRINITY_DN367_c1_g1_i3.p1,cjaponica@@@TRINITY_DN367_c1_g1_i7.p1	cremanei@@@TRINITY_DN373_c0_g1_i7.p1,cremanei@@@TRINITY_DN373_c0_g1_i3.p1,cremanei@@@TRINITY_DN373_c0_g1_i13.p1,cremanei@@@TRINITY_DN373_c0_g1_i16.p1,cremanei@@@TRINITY_DN373_c0_g1_i19.p1	ppacificus@@@TRINITY_DN114_c0_g1_i21.p1,ppacificus@@@TRINITY_DN114_c0_g1_i3.p1,ppacificus@@@TRINITY_DN114_c0_g1_i14.p1
33	14	46	0.153	CEW1@@@TRINITY_DN1295_c0_g1_i3.p1,CEW1@@@TRINITY_DN1295_c0_g1_i4.p1	DF5006@@@TRINITY_DN660_c0_g1_i3.p1,DF5006@@@TRINITY_DN660_c0_g1_i2.p1,DF5006@@@TRINITY_DN660_c0_g1_i1.p1	DF5012@@@TRINITY_DN2061_c0_g1_i2.p1,DF5012@@@TRINITY_DN2061_c0_g1_i3.p1	DF5112@@@TRINITY_DN499_c0_g1_i4.p1,DF5112@@@TRINITY_DN499_c0_g1_i2.p1	MT8872@@@TRINITY_DN6679_c0_g1_i1.p1	H14N18.4a,H14N18.4c,H14N18.4b,H14N18.4d	cbrenneri@@@TRINITY_DN412_c0_g1_i11.p1,cbrenneri@@@TRINITY_DN412_c0_g1_i7.p1,cbrenneri@@@TRINITY_DN412_c0_g1_i15.p1,cbrenneri@@@TRINITY_DN412_c0_g1_i1.p1,cbrenneri@@@TRINITY_DN412_c0_g1_i5.p1	cbriggsae@@@TRINITY_DN4009_c0_g1_i1.p1,cbriggsae@@@TRINITY_DN4009_c0_g1_i4.p1,cbriggsae@@@TRINITY_DN4009_c0_g1_i3.p1,cbriggsae@@@TRINITY_DN4009_c0_g1_i2.p1	celegans@@@TRINITY_DN13689_c0_g2_i2.p1,celegans@@@TRINITY_DN13689_c0_g2_i6.p1,celegans@@@TRINITY_DN13689_c0_g2_i1.p1,celegans@@@TRINITY_DN13689_c0_g2_i4.p1,celegans@@@TRINITY_DN13689_c0_g2_i5.p1	celegans@@@TRINITY_GG_18335_c0_g1_i3.p1,celegans@@@TRINITY_GG_18335_c0_g1_i6.p1,celegans@@@TRINITY_GG_18335_c0_g1_i5.p1,celegans@@@TRINITY_GG_18335_c0_g1_i4.p1,celegans@@@TRINITY_GG_18335_c0_g1_i8.p1	cinopinata@@@TRINITY_DN11107_c0_g1_i3.p1,cinopinata@@@TRINITY_DN11107_c0_g1_i5.p1,cinopinata@@@TRINITY_DN11107_c0_g1_i1.p1,cinopinata@@@TRINITY_DN11107_c0_g1_i2.p1	cjaponica@@@TRINITY_DN3759_c0_g1_i2.p1,cjaponica@@@TRINITY_DN3759_c0_g1_i3.p1	cremanei@@@TRINITY_DN3234_c0_g1_i1.p1,cremanei@@@TRINITY_DN3234_c0_g1_i2.p1,cremanei@@@TRINITY_DN3234_c0_g1_i3.p1,cremanei@@@TRINITY_DN3234_c0_g1_i5.p1,cremanei@@@TRINITY_DN3234_c0_g1_i7.p1,cremanei@@@TRINITY_DN3234_c0_g1_i8.p1	ppacificus@@@TRINITY_DN822_c0_g3_i1.p1
34	14	46	0.112	CEW1@@@TRINITY_DN2102_c0_g1_i1.p1	DF5006@@@TRINITY_DN668_c0_g1_i2.p1,DF5006@@@TRINITY_DN668_c0_g1_i1.p1	DF5012@@@TRINITY_DN2676_c0_g1_i2.p1	DF5112@@@TRINITY_DN2691_c0_g1_i5.p1,DF5112@@@TRINITY_DN2691_c0_g1_i7.p1,DF5112@@@TRINITY_DN2691_c0_g1_i8.p1,DF5112@@@TRINITY_DN2691_c0_g1_i3.p1	MT8872@@@TRINITY_DN141_c0_g1_i2.p1,MT8872@@@TRINITY_DN141_c0_g1_i3.p1	F46F2.2a,F46F2.2c,F46F2.2d,F46F2.2g,F46F2.2e,F46F2.2f,F46F2.2b	cbrenneri@@@TRINITY_DN418_c0_g1_i2.p1,cbrenneri@@@TRINITY_DN418_c0_g1_i6.p1,cbrenneri@@@TRINITY_DN418_c0_g1_i4.p1,cbrenneri@@@TRINITY_DN418_c0_g1_i1.p1,cbrenneri@@@TRINITY_DN418_c0_g1_i3.p1,cbrenneri@@@TRINITY_DN418_c0_g1_i7.p1	cbriggsae@@@TRINITY_DN11839_c0_g1_i11.p1,cbriggsae@@@TRINITY_DN11839_c0_g1_i12.p1,cbriggsae@@@TRINITY_DN11839_c0_g1_i7.p1	celegans@@@TRINITY_DN5353_c0_g1_i2.p1,celegans@@@TRINITY_DN5353_c0_g1_i4.p1,celegans@@@TRINITY_DN5353_c0_g1_i5.p1,celegans@@@TRINITY_DN5353_c0_g1_i3.p1	celegans@@@TRINITY_GG_17046_c0_g1_i1.p1,celegans@@@TRINITY_GG_17046_c0_g1_i2.p1	cinopinata@@@TRINITY_DN836_c0_g1_i2.p1,cinopinata@@@TRINITY_DN836_c0_g1_i3.p1,cinopinata@@@TRINITY_DN836_c0_g1_i5.p1,cinopinata@@@TRINITY_DN836_c0_g1_i7.p1,cinopinata@@@TRINITY_DN836_c0_g1_i1.p1,cinopinata@@@TRINITY_DN836_c0_g1_i6.p1	cjaponica@@@TRINITY_DN829_c0_g1_i4.p1,cjaponica@@@TRINITY_DN829_c0_g1_i2.p1,cjaponica@@@TRINITY_DN829_c0_g1_i3.p1	cremanei@@@TRINITY_DN713_c0_g1_i1.p1,cremanei@@@TRINITY_DN713_c0_g1_i2.p1,cremanei@@@TRINITY_DN713_c0_g1_i9.p1	ppacificus@@@TRINITY_DN2652_c0_g1_i2.p1,ppacificus@@@TRINITY_DN2652_c0_g1_i5.p1
35	14	45	0.454	CEW1@@@TRINITY_DN1081_c0_g1_i5.p1,CEW1@@@TRINITY_DN1081_c0_g1_i2.p1,CEW1@@@TRINITY_DN1081_c0_g1_i4.p1	DF5006@@@TRINITY_DN4734_c0_g1_i6.p1,DF5006@@@TRINITY_DN4734_c0_g1_i5.p1,DF5006@@@TRINITY_DN4734_c0_g1_i10.p1,DF5006@@@TRINITY_DN4734_c0_g1_i1.p1,DF5006@@@TRINITY_DN4734_c0_g1_i3.p1,DF5006@@@TRINITY_DN4734_c0_g1_i7.p1	DF5012@@@TRINITY_DN2286_c0_g1_i3.p1,DF5012@@@TRINITY_DN2286_c0_g1_i2.p1	DF5112@@@TRINITY_DN627_c1_g1_i3.p1,DF5112@@@TRINITY_DN627_c1_g1_i8.p1,DF5112@@@TRINITY_DN627_c1_g1_i6.p1,DF5112@@@TRINITY_DN627_c1_g1_i2.p1,DF5112@@@TRINITY_DN627_c1_g1_i7.p1,DF5112@@@TRINITY_DN627_c1_g1_i4.p1	MT8872@@@TRINITY_DN542_c0_g1_i1.p1,MT8872@@@TRINITY_DN542_c0_g1_i2.p1,MT8872@@@TRINITY_DN542_c0_g1_i3.p1,MT8872@@@TRINITY_DN542_c0_g1_i4.p1	F55A12.3	cbrenneri@@@TRINITY_DN12187_c0_g1_i6.p1,cbrenneri@@@TRINITY_DN12187_c0_g1_i3.p1	cbriggsae@@@TRINITY_DN2754_c0_g1_i1.p1,cbriggsae@@@TRINITY_DN2754_c0_g1_i2.p1	celegans@@@TRINITY_DN1030_c0_g1_i2.p1,celegans@@@TRINITY_DN1030_c0_g1_i3.p1,celegans@@@TRINITY_DN1030_c0_g1_i4.p1	celegans@@@TRINITY_GG_11723_c1_g1_i1.p1,celegans@@@TRINITY_GG_11723_c1_g1_i2.p1	cinopinata@@@TRINITY_DN8911_c0_g1_i1.p1,cinopinata@@@TRINITY_DN8911_c0_g1_i3.p1,cinopinata@@@TRINITY_DN8911_c0_g1_i4.p1,cinopinata@@@TRINITY_DN8911_c0_g1_i5.p1,cinopinata@@@TRINITY_DN8911_c0_g1_i7.p1,cinopinata@@@TRINITY_DN8911_c0_g1_i8.p1	cjaponica@@@TRINITY_DN3683_c0_g1_i2.p1,cjaponica@@@TRINITY_DN3683_c0_g1_i3.p1	cremanei@@@TRINITY_DN18282_c0_g1_i2.p1,cremanei@@@TRINITY_DN18282_c0_g1_i3.p1,cremanei@@@TRINITY_DN18282_c0_g1_i4.p1,cremanei@@@TRINITY_DN18282_c0_g1_i1.p1	ppacificus@@@TRINITY_DN2531_c0_g1_i1.p1,ppacificus@@@TRINITY_DN2531_c0_g1_i3.p1
36	14	45	0.234	CEW1@@@TRINITY_DN12824_c0_g1_i1.p1	DF5006@@@TRINITY_DN2248_c0_g1_i2.p1	DF5012@@@TRINITY_DN1278_c0_g2_i1.p1,DF5012@@@TRINITY_DN1278_c0_g1_i1.p1	DF5112@@@TRINITY_DN1686_c0_g1_i2.p1,DF5112@@@TRINITY_DN1686_c0_g1_i1.p1	MT8872@@@TRINITY_DN127_c0_g1_i1.p1,MT8872@@@TRINITY_DN127_c0_g1_i2.p1,MT8872@@@TRINITY_DN127_c0_g1_i3.p2,MT8872@@@TRINITY_DN127_c0_g1_i4.p1,MT8872@@@TRINITY_DN127_c0_g1_i5.p1,MT8872@@@TRINITY_DN127_c0_g1_i6.p1,MT8872@@@TRINITY_DN127_c0_g2_i1.p1	C53A3.2,F44E7.2,K09H11.7	cbrenneri@@@TRINITY_DN3046_c0_g1_i2.p1,cbrenneri@@@TRINITY_DN3046_c0_g1_i3.p1,cbrenneri@@@TRINITY_DN3046_c0_g1_i4.p1,cbrenneri@@@TRINITY_DN3046_c0_g1_i1.p1	cbriggsae@@@TRINITY_DN184_c0_g1_i1.p1,cbriggsae@@@TRINITY_DN184_c0_g1_i2.p1,cbriggsae@@@TRINITY_DN184_c0_g1_i3.p1,cbriggsae@@@TRINITY_DN184_c0_g1_i4.p1	celegans@@@TRINITY_DN162_c0_g1_i2.p1,celegans@@@TRINITY_DN162_c0_g1_i4.p1,celegans@@@TRINITY_DN162_c0_g1_i1.p1,celegans@@@TRINITY_DN162_c0_g1_i3.p1	celegans@@@TRINITY_GG_18622_c0_g1_i1.p1,celegans@@@TRINITY_GG_7649_c0_g1_i1.p1	cinopinata@@@TRINITY_DN8589_c0_g1_i3.p1,cinopinata@@@TRINITY_DN8589_c0_g1_i1.p1,cinopinata@@@TRINITY_DN8589_c0_g1_i2.p1,cinopinata@@@TRINITY_DN8589_c0_g1_i4.p1	cjaponica@@@TRINITY_DN705_c0_g1_i12.p1,cjaponica@@@TRINITY_DN705_c0_g1_i6.p1,cjaponica@@@TRINITY_DN705_c0_g1_i1.p1,cjaponica@@@TRINITY_DN705_c0_g1_i11.p1,cjaponica@@@TRINITY_DN705_c0_g1_i17.p1,cjaponica@@@TRINITY_DN705_c0_g1_i9.p1	cremanei@@@TRINITY_DN342_c0_g1_i2.p1,cremanei@@@TRINITY_DN342_c0_g1_i3.p1,cremanei@@@TRINITY_DN342_c0_g1_i1.p1,cremanei@@@TRINITY_DN342_c0_g1_i4.p1	ppacificus@@@TRINITY_DN208_c0_g1_i1.p1
37	14	45	0.116	CEW1@@@TRINITY_DN13443_c0_g1_i1.p1	DF5006@@@TRINITY_DN13804_c0_g1_i1.p1	DF5012@@@TRINITY_DN6921_c0_g1_i2.p1	DF5112@@@TRINITY_DN179_c0_g1_i2.p1,DF5112@@@TRINITY_DN179_c0_g1_i3.p1,DF5112@@@TRINITY_DN179_c0_g1_i4.p1,DF5112@@@TRINITY_DN179_c0_g1_i5.p1,DF5112@@@TRINITY_DN179_c0_g1_i8.p1,DF5112@@@TRINITY_DN10078_c0_g1_i1.p1	MT8872@@@TRINITY_DN2006_c0_g1_i1.p1	K10B3.7,K10B3.8,F33H1.2,T09F3.3	cbrenneri@@@TRINITY_DN2815_c0_g1_i3.p1,cbrenneri@@@TRINITY_DN2815_c0_g1_i5.p1,cbrenneri@@@TRINITY_DN2815_c0_g1_i2.p1,cbrenneri@@@TRINITY_DN2815_c0_g1_i4.p1	cbriggsae@@@TRINITY_DN15_c0_g1_i1.p1,cbriggsae@@@TRINITY_DN15_c0_g1_i3.p1,cbriggsae@@@TRINITY_DN15_c0_g1_i4.p1,cbriggsae@@@TRINITY_DN15_c0_g1_i6.p1,cbriggsae@@@TRINITY_DN15_c0_g1_i2.p1,cbriggsae@@@TRINITY_DN15_c0_g1_i5.p1	celegans@@@TRINITY_DN160_c0_g1_i1.p1,celegans@@@TRINITY_DN160_c0_g1_i2.p1,celegans@@@TRINITY_DN160_c0_g2_i1.p1	celegans@@@TRINITY_GG_17220_c0_g1_i1.p1,celegans@@@TRINITY_GG_17220_c0_g1_i2.p1,celegans@@@TRINITY_GG_828_c0_g1_i1.p1,celegans@@@TRINITY_GG_837_c0_g1_i1.p1	cinopinata@@@TRINITY_DN11_c0_g2_i1.p1,cinopinata@@@TRINITY_DN11_c0_g2_i2.p1,cinopinata@@@TRINITY_DN11_c0_g2_i3.p1,cinopinata@@@TRINITY_DN9341_c0_g1_i1.p1	cjaponica@@@TRINITY_DN17_c0_g2_i1.p2,cjaponica@@@TRINITY_DN17_c0_g2_i2.p1,cjaponica@@@TRINITY_DN8118_c0_g1_i1.p1	cremanei@@@TRINITY_DN605_c0_g1_i3.p1,cremanei@@@TRINITY_DN605_c0_g1_i6.p1,cremanei@@@TRINITY_DN605_c0_g1_i1.p1,cremanei@@@TRINITY_DN605_c0_g1_i2.p1,cremanei@@@TRINITY_DN605_c0_g1_i4.p1,cremanei@@@TRINITY_DN605_c0_g1_i7.p1	ppacificus@@@TRINITY_DN5170_c0_g2_i1.p1
38	14	45	0.116	CEW1@@@TRINITY_DN209_c0_g1_i1.p1,CEW1@@@TRINITY_DN209_c0_g1_i2.p1	DF5006@@@TRINITY_DN4558_c0_g1_i1.p1,DF5006@@@TRINITY_DN4558_c0_g1_i2.p1,DF5006@@@TRINITY_DN4558_c0_g1_i3.p1,DF5006@@@TRINITY_DN4558_c0_g1_i5.p1,DF5006@@@TRINITY_DN4558_c0_g1_i6.p1	DF5012@@@TRINITY_DN745_c0_g1_i2.p1,DF5012@@@TRINITY_DN745_c0_g1_i3.p1	DF5112@@@TRINITY_DN72_c0_g1_i3.p1,DF5112@@@TRINITY_DN72_c0_g1_i2.p1,DF5112@@@TRINITY_DN72_c0_g1_i1.p1	MT8872@@@TRINITY_DN13623_c0_g1_i1.p1,MT8872@@@TRINITY_DN2172_c0_g1_i2.p1	T05H4.13a,T05H4.13b,T05H4.13c,T05H4.13d	cbrenneri@@@TRINITY_DN1738_c0_g1_i1.p1	cbriggsae@@@TRINITY_DN88_c0_g1_i1.p1,cbriggsae@@@TRINITY_DN88_c0_g1_i2.p1	celegans@@@TRINITY_DN1358_c0_g1_i1.p1,celegans@@@TRINITY_DN1358_c0_g1_i2.p1,celegans@@@TRINITY_DN1358_c0_g1_i3.p1,celegans@@@TRINITY_DN1358_c0_g1_i4.p1	celegans@@@TRINITY_GG_19330_c0_g1_i1.p1,celegans@@@TRINITY_GG_19330_c0_g1_i2.p1,celegans@@@TRINITY_GG_19330_c0_g1_i3.p1	cinopinata@@@TRINITY_DN861_c0_g1_i1.p1,cinopinata@@@TRINITY_DN861_c0_g1_i2.p1,cinopinata@@@TRINITY_DN861_c0_g1_i3.p1,cinopinata@@@TRINITY_DN861_c0_g1_i4.p1,cinopinata@@@TRINITY_DN861_c0_g1_i5.p1	cjaponica@@@TRINITY_DN4_c0_g1_i1.p1,cjaponica@@@TRINITY_DN4_c0_g1_i2.p1,cjaponica@@@TRINITY_DN4_c0_g1_i3.p1,cjaponica@@@TRINITY_DN4_c0_g1_i4.p1,cjaponica@@@TRINITY_DN4_c0_g1_i5.p1	cremanei@@@TRINITY_DN2032_c0_g1_i2.p1,cremanei@@@TRINITY_DN2032_c0_g1_i3.p1,cremanei@@@TRINITY_DN2032_c0_g1_i4.p1	ppacificus@@@TRINITY_DN502_c0_g1_i1.p1,ppacificus@@@TRINITY_DN502_c0_g1_i2.p1,ppacificus@@@TRINITY_DN502_c0_g1_i3.p1,ppacificus@@@TRINITY_DN502_c0_g1_i4.p1
39	14	45	0.101	CEW1@@@TRINITY_DN2341_c0_g1_i4.p1,CEW1@@@TRINITY_DN2341_c0_g1_i6.p1,CEW1@@@TRINITY_DN2341_c0_g1_i9.p1	DF5006@@@TRINITY_DN3151_c0_g1_i2.p1,DF5006@@@TRINITY_DN3151_c0_g1_i1.p1,DF5006@@@TRINITY_DN3151_c0_g1_i3.p1	DF5012@@@TRINITY_DN4271_c0_g1_i1.p1,DF5012@@@TRINITY_DN4271_c0_g1_i2.p1,DF5012@@@TRINITY_DN4271_c0_g1_i3.p1	DF5112@@@TRINITY_DN906_c2_g1_i1.p1,DF5112@@@TRINITY_DN906_c2_g1_i2.p1,DF5112@@@TRINITY_DN906_c2_g1_i3.p1	MT8872@@@TRINITY_DN9364_c0_g2_i1.p1	ZK524.2a,ZK524.2k,ZK524.2e,ZK524.2f,ZK524.2i,ZK524.2j,ZK524.2b,ZK524.2d,ZK524.2g,ZK524.2c,ZK524.2h	cbrenneri@@@TRINITY_DN10897_c0_g1_i11.p1,cbrenneri@@@TRINITY_DN10897_c0_g1_i2.p1,cbrenneri@@@TRINITY_DN10897_c0_g1_i9.p1	cbriggsae@@@TRINITY_DN6253_c0_g2_i4.p1,cbriggsae@@@TRINITY_DN6253_c0_g2_i3.p1	celegans@@@TRINITY_DN3225_c0_g2_i3.p1,celegans@@@TRINITY_DN3225_c0_g2_i1.p1,celegans@@@TRINITY_DN3225_c0_g2_i2.p1,celegans@@@TRINITY_DN3225_c0_g2_i4.p1	celegans@@@TRINITY_GG_10800_c0_g1_i1.p1	cinopinata@@@TRINITY_DN1984_c0_g1_i1.p1,cinopinata@@@TRINITY_DN1984_c0_g1_i2.p1,cinopinata@@@TRINITY_DN1984_c0_g1_i3.p1	cjaponica@@@TRINITY_DN5003_c0_g2_i2.p1,cjaponica@@@TRINITY_DN5003_c0_g2_i4.p1,cjaponica@@@TRINITY_DN5003_c0_g2_i5.p1	cremanei@@@TRINITY_DN23912_c0_g1_i10.p1,cremanei@@@TRINITY_DN23912_c0_g1_i3.p1,cremanei@@@TRINITY_DN23912_c0_g1_i9.p1	ppacificus@@@TRINITY_DN3011_c0_g1_i5.p1,ppacificus@@@TRINITY_DN3011_c0_g1_i2.p1
40	14	44	0.22	CEW1@@@TRINITY_DN1936_c0_g1_i2.p1,CEW1@@@TRINITY_DN1936_c0_g1_i4.p1,CEW1@@@TRINITY_DN1936_c0_g1_i1.p1,CEW1@@@TRINITY_DN1936_c0_g1_i5.p1,CEW1@@@TRINITY_DN1936_c0_g1_i6.p1,CEW1@@@TRINITY_DN1936_c0_g1_i3.p1	DF5006@@@TRINITY_DN1364_c0_g1_i2.p1,DF5006@@@TRINITY_DN1364_c0_g1_i6.p1,DF5006@@@TRINITY_DN1364_c0_g1_i4.p1,DF5006@@@TRINITY_DN1364_c0_g1_i8.p1	DF5012@@@TRINITY_DN2608_c0_g1_i19.p1,DF5012@@@TRINITY_DN2608_c0_g1_i16.p1,DF5012@@@TRINITY_DN2608_c0_g1_i2.p1,DF5012@@@TRINITY_DN2608_c0_g1_i6.p1,DF5012@@@TRINITY_DN2608_c0_g1_i8.p1	DF5112@@@TRINITY_DN1694_c0_g1_i8.p1,DF5112@@@TRINITY_DN1694_c0_g1_i7.p1	MT8872@@@TRINITY_DN2725_c0_g1_i2.p1,MT8872@@@TRINITY_DN2725_c0_g1_i3.p1	C34E11.3e,C34E11.3a,C34E11.3f,C34E11.3g,C34E11.3b	cbrenneri@@@TRINITY_DN7897_c0_g1_i9.p1,cbrenneri@@@TRINITY_DN7897_c0_g1_i4.p1,cbrenneri@@@TRINITY_DN7897_c0_g1_i8.p1	cbriggsae@@@TRINITY_DN3498_c0_g3_i3.p1,cbriggsae@@@TRINITY_DN3498_c0_g3_i1.p1,cbriggsae@@@TRINITY_DN3498_c0_g3_i2.p1	celegans@@@TRINITY_DN3783_c0_g1_i3.p1,celegans@@@TRINITY_DN3783_c0_g1_i2.p1	celegans@@@TRINITY_GG_4688_c0_g1_i7.p1,celegans@@@TRINITY_GG_4688_c0_g1_i3.p1,celegans@@@TRINITY_GG_4688_c0_g1_i1.p1	cinopinata@@@TRINITY_DN4078_c0_g1_i2.p1,cinopinata@@@TRINITY_DN4078_c0_g1_i3.p1	cjaponica@@@TRINITY_DN12825_c0_g1_i6.p1	cremanei@@@TRINITY_DN17350_c0_g1_i1.p1,cremanei@@@TRINITY_DN17350_c0_g1_i6.p1	ppacificus@@@TRINITY_DN1631_c0_g1_i2.p1,ppacificus@@@TRINITY_DN1631_c0_g1_i15.p1,ppacificus@@@TRINITY_DN1631_c0_g1_i4.p1,ppacificus@@@TRINITY_DN1631_c0_g1_i9.p1
41	14	44	0.201	CEW1@@@TRINITY_DN6675_c0_g1_i2.p1,CEW1@@@TRINITY_DN6675_c0_g1_i3.p1	DF5006@@@TRINITY_DN1743_c0_g1_i1.p1,DF5006@@@TRINITY_DN1743_c0_g1_i2.p1	DF5012@@@TRINITY_DN1590_c0_g1_i1.p1,DF5012@@@TRINITY_DN1590_c0_g1_i2.p1,DF5012@@@TRINITY_DN1590_c0_g1_i3.p1,DF5012@@@TRINITY_DN1590_c0_g1_i4.p1	DF5112@@@TRINITY_DN1393_c0_g1_i1.p1,DF5112@@@TRINITY_DN1393_c0_g1_i4.p1,DF5112@@@TRINITY_DN1393_c0_g1_i3.p1,DF5112@@@TRINITY_DN1393_c0_g1_i5.p1	MT8872@@@TRINITY_DN17435_c0_g1_i1.p1	M02A10.3b,M02A10.3a,M02A10.3c	cbrenneri@@@TRINITY_DN5616_c0_g1_i3.p1,cbrenneri@@@TRINITY_DN5616_c0_g1_i4.p1	cbriggsae@@@TRINITY_DN7601_c0_g1_i4.p1,cbriggsae@@@TRINITY_DN7601_c0_g1_i3.p1,cbriggsae@@@TRINITY_DN7601_c0_g1_i2.p1	celegans@@@TRINITY_DN448_c0_g1_i2.p1,celegans@@@TRINITY_DN448_c0_g1_i3.p1,celegans@@@TRINITY_DN448_c0_g1_i4.p1,celegans@@@TRINITY_DN448_c0_g1_i1.p1	celegans@@@TRINITY_GG_16534_c0_g1_i2.p1,celegans@@@TRINITY_GG_16534_c0_g1_i4.p1,celegans@@@TRINITY_GG_16534_c0_g1_i3.p1,celegans@@@TRINITY_GG_16534_c0_g1_i1.p1	cinopinata@@@TRINITY_DN7581_c0_g1_i4.p1,cinopinata@@@TRINITY_DN7581_c0_g1_i3.p1,cinopinata@@@TRINITY_DN7581_c0_g1_i2.p1,cinopinata@@@TRINITY_DN7581_c0_g1_i6.p1,cinopinata@@@TRINITY_DN7581_c0_g1_i5.p1	cjaponica@@@TRINITY_DN4902_c0_g1_i1.p1	cremanei@@@TRINITY_DN15087_c0_g1_i15.p1,cremanei@@@TRINITY_DN15087_c0_g1_i2.p1,cremanei@@@TRINITY_DN15087_c0_g1_i1.p1,cremanei@@@TRINITY_DN15087_c0_g1_i11.p1,cremanei@@@TRINITY_DN15087_c0_g1_i12.p1,cremanei@@@TRINITY_DN15087_c0_g1_i3.p1,cremanei@@@TRINITY_DN15087_c0_g1_i14.p1,cremanei@@@TRINITY_DN15087_c0_g1_i8.p1	ppacificus@@@TRINITY_DN16057_c0_g1_i2.p1
42	14	44	0.184	CEW1@@@TRINITY_DN1134_c0_g1_i1.p1,CEW1@@@TRINITY_DN1134_c0_g1_i2.p1,CEW1@@@TRINITY_DN1134_c0_g1_i3.p1	DF5006@@@TRINITY_DN924_c0_g1_i7.p1,DF5006@@@TRINITY_DN924_c0_g1_i9.p1,DF5006@@@TRINITY_DN924_c0_g1_i1.p1,DF5006@@@TRINITY_DN924_c0_g1_i8.p1	DF5012@@@TRINITY_DN1463_c0_g1_i2.p1,DF5012@@@TRINITY_DN1463_c0_g1_i3.p1,DF5012@@@TRINITY_DN1463_c0_g1_i4.p1	DF5112@@@TRINITY_DN938_c0_g1_i1.p1,DF5112@@@TRINITY_DN938_c0_g1_i4.p1,DF5112@@@TRINITY_DN938_c0_g1_i5.p1,DF5112@@@TRINITY_DN938_c0_g1_i7.p1	MT8872@@@TRINITY_DN865_c0_g1_i2.p1,MT8872@@@TRINITY_DN865_c0_g1_i3.p1	ZC477.9a,ZC477.9c,ZC477.9d,ZC477.9e	cbrenneri@@@TRINITY_DN4097_c0_g1_i1.p1,cbrenneri@@@TRINITY_DN4097_c0_g1_i7.p1,cbrenneri@@@TRINITY_DN4097_c0_g1_i6.p1,cbrenneri@@@TRINITY_DN4097_c0_g1_i4.p1	cbriggsae@@@TRINITY_DN699_c0_g1_i2.p1,cbriggsae@@@TRINITY_DN699_c0_g1_i6.p1,cbriggsae@@@TRINITY_DN699_c0_g1_i3.p1	celegans@@@TRINITY_DN2453_c0_g1_i4.p1,celegans@@@TRINITY_DN2453_c0_g1_i5.p1,celegans@@@TRINITY_DN2453_c0_g1_i1.p1	celegans@@@TRINITY_GG_13974_c0_g1_i3.p1,celegans@@@TRINITY_GG_13974_c0_g1_i4.p1,celegans@@@TRINITY_GG_13974_c0_g1_i1.p1	cinopinata@@@TRINITY_DN3155_c0_g1_i10.p1,cinopinata@@@TRINITY_DN3155_c0_g1_i13.p1,cinopinata@@@TRINITY_DN3155_c0_g1_i2.p1,cinopinata@@@TRINITY_DN3155_c0_g1_i8.p1	cjaponica@@@TRINITY_DN1083_c0_g1_i3.p1,cjaponica@@@TRINITY_DN1083_c0_g1_i4.p1	cremanei@@@TRINITY_DN2983_c0_g1_i2.p1,cremanei@@@TRINITY_DN2983_c0_g1_i4.p1,cremanei@@@TRINITY_DN2983_c0_g1_i3.p1	ppacificus@@@TRINITY_DN460_c0_g1_i3.p1,ppacificus@@@TRINITY_DN460_c0_g1_i1.p1
43	14	44	0.169	CEW1@@@TRINITY_DN203_c0_g2_i3.p1	DF5006@@@TRINITY_DN1889_c0_g1_i1.p1,DF5006@@@TRINITY_DN1889_c0_g1_i2.p1,DF5006@@@TRINITY_DN1889_c0_g3_i1.p1	DF5012@@@TRINITY_DN93_c0_g3_i1.p1,DF5012@@@TRINITY_DN93_c0_g2_i1.p1	DF5112@@@TRINITY_DN19_c0_g1_i3.p1,DF5112@@@TRINITY_DN19_c0_g1_i2.p1,DF5112@@@TRINITY_DN19_c0_g1_i1.p1	MT8872@@@TRINITY_DN2113_c0_g1_i7.p1	C36E8.5,K01G5.7,C54C6.2	cbrenneri@@@TRINITY_DN4956_c0_g2_i2.p1,cbrenneri@@@TRINITY_DN4956_c0_g1_i2.p1,cbrenneri@@@TRINITY_DN4956_c0_g2_i1.p1	cbriggsae@@@TRINITY_DN37_c0_g1_i1.p1,cbriggsae@@@TRINITY_DN37_c0_g2_i1.p1,cbriggsae@@@TRINITY_DN37_c0_g3_i1.p1	celegans@@@TRINITY_DN20_c0_g3_i1.p1,celegans@@@TRINITY_DN20_c0_g1_i1.p1,celegans@@@TRINITY_DN20_c0_g1_i2.p1	celegans@@@TRINITY_GG_20703_c0_g1_i1.p1,celegans@@@TRINITY_GG_21054_c0_g1_i1.p1,celegans@@@TRINITY_GG_21143_c1_g1_i1.p1	cinopinata@@@TRINITY_DN379_c0_g2_i5.p1,cinopinata@@@TRINITY_DN379_c0_g2_i7.p1,cinopinata@@@TRINITY_DN379_c0_g2_i6.p1,cinopinata@@@TRINITY_DN282_c0_g1_i1.p1,cinopinata@@@TRINITY_DN379_c0_g2_i4.p1,cinopinata@@@TRINITY_DN5889_c0_g1_i1.p1	cjaponica@@@TRINITY_DN13909_c0_g1_i3.p1,cjaponica@@@TRINITY_DN13909_c0_g1_i2.p1,cjaponica@@@TRINITY_DN13909_c0_g1_i1.p1,cjaponica@@@TRINITY_DN3492_c0_g1_i2.p1,cjaponica@@@TRINITY_DN3492_c0_g1_i1.p1	cremanei@@@TRINITY_DN57_c0_g1_i2.p1,cremanei@@@TRINITY_DN57_c0_g1_i4.p1,cremanei@@@TRINITY_DN57_c0_g2_i1.p1,cremanei@@@TRINITY_DN57_c0_g1_i1.p1	ppacificus@@@TRINITY_DN346_c0_g1_i5.p1,ppacificus@@@TRINITY_DN346_c0_g1_i2.p1,ppacificus@@@TRINITY_DN346_c0_g1_i4.p1,ppacificus@@@TRINITY_DN401_c0_g1_i1.p1
44	14	44	0.115	CEW1@@@TRINITY_DN6749_c0_g1_i1.p1,CEW1@@@TRINITY_DN5559_c0_g1_i1.p2	DF5006@@@TRINITY_DN12294_c0_g1_i1.p2,DF5006@@@TRINITY_DN18555_c0_g1_i1.p1	DF5012@@@TRINITY_DN14871_c0_g1_i1.p1	DF5112@@@TRINITY_DN525_c0_g1_i1.p1,DF5112@@@TRINITY_DN525_c0_g3_i1.p1,DF5112@@@TRINITY_DN1570_c0_g1_i1.p1	MT8872@@@TRINITY_DN1976_c0_g1_i1.p2,MT8872@@@TRINITY_DN2619_c0_g1_i1.p2	C50F4.13,ZK131.6,B0035.7,ZK131.10,T23D8.6,T10C6.12,K06C4.3,K06C4.11,H02I12.7,F55G1.10,F54E12.5c,F54E12.5b,F54E12.5a,F45F2.4,F35H10.1,F17E9.13,F08G2.2,F07B7.3,F07B7.10	cbrenneri@@@TRINITY_DN2695_c0_g1_i5.p1	cbriggsae@@@TRINITY_DN4275_c0_g1_i1.p2	celegans@@@TRINITY_DN66_c0_g1_i1.p1,celegans@@@TRINITY_DN66_c0_g1_i6.p1,celegans@@@TRINITY_DN66_c0_g1_i8.p2	celegans@@@TRINITY_GG_10494_c0_g1_i1.p1,celegans@@@TRINITY_GG_5816_c0_g1_i1.p2,celegans@@@TRINITY_GG_5917_c0_g1_i1.p1,celegans@@@TRINITY_GG_19048_c5_g1_i1.p1,celegans@@@TRINITY_GG_15306_c0_g1_i1.p1	cinopinata@@@TRINITY_DN1641_c0_g5_i1.p1,cinopinata@@@TRINITY_DN1601_c0_g1_i1.p1	cjaponica@@@TRINITY_DN4512_c0_g1_i1.p2	cremanei@@@TRINITY_DN69_c0_g2_i2.p1	ppacificus@@@TRINITY_DN24768_c0_g1_i1.p2
45	14	43	0.389	CEW1@@@TRINITY_DN489_c0_g1_i1.p1,CEW1@@@TRINITY_DN489_c0_g1_i8.p1,CEW1@@@TRINITY_DN489_c0_g1_i6.p1	DF5006@@@TRINITY_DN1667_c0_g1_i6.p1,DF5006@@@TRINITY_DN1667_c0_g1_i3.p1,DF5006@@@TRINITY_DN1667_c0_g1_i5.p1	DF5012@@@TRINITY_DN1971_c0_g1_i8.p1	DF5112@@@TRINITY_DN430_c0_g1_i2.p1,DF5112@@@TRINITY_DN430_c0_g1_i7.p1,DF5112@@@TRINITY_DN430_c0_g1_i8.p1	MT8872@@@TRINITY_DN3210_c0_g1_i2.p1	Y51A2D.19i,Y51A2D.19b,Y51A2D.19j,Y51A2D.19l,Y51A2D.19a,Y51A2D.19h,Y51A2D.19k,Y51A2D.19m,Y51A2D.19d,Y51A2D.19e,Y51A2D.19c,Y51A2D.19f,Y51A2D.19g	cbrenneri@@@TRINITY_DN5721_c0_g1_i8.p1	cbriggsae@@@TRINITY_DN3331_c0_g1_i2.p1,cbriggsae@@@TRINITY_DN3331_c0_g1_i5.p1	celegans@@@TRINITY_DN3759_c0_g1_i2.p1,celegans@@@TRINITY_DN3759_c0_g1_i4.p1	celegans@@@TRINITY_GG_7277_c0_g1_i2.p1,celegans@@@TRINITY_GG_7277_c0_g1_i1.p1	cinopinata@@@TRINITY_DN2619_c0_g1_i2.p1,cinopinata@@@TRINITY_DN2619_c0_g1_i5.p1,cinopinata@@@TRINITY_DN2619_c0_g1_i6.p1	cjaponica@@@TRINITY_DN6095_c0_g1_i2.p1,cjaponica@@@TRINITY_DN6095_c0_g1_i5.p1	cremanei@@@TRINITY_DN6402_c0_g1_i6.p1,cremanei@@@TRINITY_DN6402_c0_g1_i2.p1,cremanei@@@TRINITY_DN6402_c0_g1_i1.p1	ppacificus@@@TRINITY_DN2341_c0_g1_i3.p1,ppacificus@@@TRINITY_DN2341_c0_g1_i4.p1,ppacificus@@@TRINITY_DN2341_c0_g1_i6.p1,ppacificus@@@TRINITY_DN2341_c0_g1_i8.p1
46	14	43	0.262	CEW1@@@TRINITY_DN115_c0_g1_i10.p1,CEW1@@@TRINITY_DN115_c0_g1_i5.p1,CEW1@@@TRINITY_DN115_c0_g1_i1.p1,CEW1@@@TRINITY_DN115_c0_g1_i2.p1,CEW1@@@TRINITY_DN115_c0_g1_i8.p1,CEW1@@@TRINITY_DN115_c0_g1_i9.p1,CEW1@@@TRINITY_DN115_c0_g1_i6.p1	DF5006@@@TRINITY_DN3601_c0_g1_i5.p1,DF5006@@@TRINITY_DN3601_c0_g1_i4.p1,DF5006@@@TRINITY_DN3601_c0_g1_i6.p1	DF5012@@@TRINITY_DN1977_c0_g1_i10.p1,DF5012@@@TRINITY_DN1977_c0_g1_i6.p1,DF5012@@@TRINITY_DN1977_c0_g1_i9.p1,DF5012@@@TRINITY_DN1977_c0_g1_i4.p1	DF5112@@@TRINITY_DN492_c0_g1_i2.p1,DF5112@@@TRINITY_DN492_c0_g1_i3.p1,DF5112@@@TRINITY_DN492_c0_g1_i5.p1,DF5112@@@TRINITY_DN492_c0_g1_i8.p1	MT8872@@@TRINITY_DN1245_c0_g1_i2.p1,MT8872@@@TRINITY_DN1245_c0_g1_i8.p1,MT8872@@@TRINITY_DN1245_c0_g1_i1.p1	Y54F10AM.2b,Y54F10AM.2a,Y54F10AM.2c,Y54F10AM.2d	cbrenneri@@@TRINITY_DN5995_c0_g2_i1.p1,cbrenneri@@@TRINITY_DN5995_c0_g2_i2.p1	cbriggsae@@@TRINITY_DN6445_c0_g1_i1.p1,cbriggsae@@@TRINITY_DN6445_c0_g1_i2.p1	celegans@@@TRINITY_DN3546_c0_g2_i1.p1,celegans@@@TRINITY_DN3546_c0_g2_i2.p1	celegans@@@TRINITY_GG_7913_c0_g1_i1.p1,celegans@@@TRINITY_GG_7913_c0_g1_i2.p1	cinopinata@@@TRINITY_DN2222_c0_g1_i1.p1,cinopinata@@@TRINITY_DN2222_c0_g1_i5.p1,cinopinata@@@TRINITY_DN2222_c0_g1_i2.p1	cjaponica@@@TRINITY_DN5320_c0_g1_i1.p1	cremanei@@@TRINITY_DN2019_c0_g1_i5.p1,cremanei@@@TRINITY_DN2019_c0_g1_i6.p1,cremanei@@@TRINITY_DN2019_c0_g1_i2.p1,cremanei@@@TRINITY_DN2019_c0_g1_i4.p1	ppacificus@@@TRINITY_DN7390_c0_g2_i4.p1,ppacificus@@@TRINITY_DN7390_c0_g2_i6.p1
47	14	43	0.258	CEW1@@@TRINITY_DN93_c0_g1_i1.p1,CEW1@@@TRINITY_DN93_c0_g1_i3.p1,CEW1@@@TRINITY_DN93_c0_g1_i7.p1	DF5006@@@TRINITY_DN300_c0_g1_i1.p1,DF5006@@@TRINITY_DN300_c0_g1_i2.p1,DF5006@@@TRINITY_DN300_c0_g1_i3.p1	DF5012@@@TRINITY_DN121_c0_g1_i3.p1,DF5012@@@TRINITY_DN121_c0_g1_i2.p1,DF5012@@@TRINITY_DN121_c0_g1_i4.p1,DF5012@@@TRINITY_DN121_c0_g1_i1.p1	DF5112@@@TRINITY_DN217_c0_g1_i6.p1,DF5112@@@TRINITY_DN217_c0_g1_i8.p1,DF5112@@@TRINITY_DN217_c0_g1_i10.p1,DF5112@@@TRINITY_DN217_c0_g1_i11.p1,DF5112@@@TRINITY_DN217_c0_g1_i7.p1,DF5112@@@TRINITY_DN217_c0_g1_i12.p1	MT8872@@@TRINITY_DN481_c0_g1_i1.p1,MT8872@@@TRINITY_DN481_c0_g1_i3.p1,MT8872@@@TRINITY_DN481_c0_g1_i4.p1,MT8872@@@TRINITY_DN481_c0_g1_i2.p1	F40E10.6	cbrenneri@@@TRINITY_DN347_c0_g1_i2.p1,cbrenneri@@@TRINITY_DN347_c0_g1_i3.p1,cbrenneri@@@TRINITY_DN347_c0_g1_i1.p1	cbriggsae@@@TRINITY_DN955_c0_g1_i1.p1,cbriggsae@@@TRINITY_DN955_c0_g1_i3.p1,cbriggsae@@@TRINITY_DN955_c0_g1_i2.p1	celegans@@@TRINITY_DN395_c0_g1_i1.p1,celegans@@@TRINITY_DN395_c0_g1_i2.p1,celegans@@@TRINITY_DN395_c0_g1_i3.p1,celegans@@@TRINITY_DN395_c0_g1_i4.p1	celegans@@@TRINITY_GG_17078_c0_g1_i1.p1,celegans@@@TRINITY_GG_17078_c0_g1_i3.p1,celegans@@@TRINITY_GG_17078_c0_g1_i4.p1,celegans@@@TRINITY_GG_17078_c0_g1_i2.p1	cinopinata@@@TRINITY_DN332_c0_g1_i1.p1,cinopinata@@@TRINITY_DN332_c0_g1_i3.p1	cjaponica@@@TRINITY_DN7986_c1_g1_i1.p1	cremanei@@@TRINITY_DN3127_c0_g1_i1.p1,cremanei@@@TRINITY_DN3127_c0_g1_i3.p1,cremanei@@@TRINITY_DN3127_c0_g1_i2.p1	ppacificus@@@TRINITY_DN4875_c0_g1_i1.p1,ppacificus@@@TRINITY_DN4875_c0_g1_i3.p1
48	14	43	0.12	CEW1@@@TRINITY_DN423_c0_g1_i16.p1,CEW1@@@TRINITY_DN423_c0_g1_i5.p1,CEW1@@@TRINITY_DN423_c0_g1_i3.p1	DF5006@@@TRINITY_DN6107_c0_g1_i10.p1,DF5006@@@TRINITY_DN6107_c0_g1_i19.p1,DF5006@@@TRINITY_DN6107_c0_g1_i15.p1,DF5006@@@TRINITY_DN6107_c0_g1_i3.p1	DF5012@@@TRINITY_DN149_c0_g1_i10.p1,DF5012@@@TRINITY_DN149_c0_g1_i17.p1,DF5012@@@TRINITY_DN149_c0_g1_i14.p1	DF5112@@@TRINITY_DN232_c1_g1_i1.p1,DF5112@@@TRINITY_DN232_c1_g1_i2.p1	MT8872@@@TRINITY_DN206_c0_g1_i11.p1,MT8872@@@TRINITY_DN206_c0_g1_i6.p1,MT8872@@@TRINITY_DN206_c0_g1_i7.p1	W02C12.3d,W02C12.3i,W02C12.3a,W02C12.3c	cbrenneri@@@TRINITY_DN9579_c0_g1_i18.p1,cbrenneri@@@TRINITY_DN9579_c0_g1_i23.p1,cbrenneri@@@TRINITY_DN9579_c0_g1_i13.p1,cbrenneri@@@TRINITY_DN9579_c0_g1_i16.p1,cbrenneri@@@TRINITY_DN9579_c0_g1_i15.p1,cbrenneri@@@TRINITY_DN9579_c0_g1_i27.p1	cbriggsae@@@TRINITY_DN317_c0_g1_i7.p1,cbriggsae@@@TRINITY_DN317_c0_g1_i11.p1	celegans@@@TRINITY_DN2411_c0_g1_i10.p1,celegans@@@TRINITY_DN2411_c0_g1_i5.p1	celegans@@@TRINITY_GG_14282_c0_g1_i3.p1	cinopinata@@@TRINITY_DN2535_c0_g1_i12.p1,cinopinata@@@TRINITY_DN2535_c0_g1_i7.p1,cinopinata@@@TRINITY_DN2535_c0_g1_i21.p1,cinopinata@@@TRINITY_DN2535_c0_g1_i5.p1	cjaponica@@@TRINITY_DN170_c0_g1_i7.p1,cjaponica@@@TRINITY_DN170_c0_g1_i13.p1,cjaponica@@@TRINITY_DN170_c0_g1_i11.p1	cremanei@@@TRINITY_DN2200_c0_g1_i13.p1,cremanei@@@TRINITY_DN2200_c0_g1_i5.p1	ppacificus@@@TRINITY_DN239_c0_g1_i1.p1,ppacificus@@@TRINITY_DN239_c0_g1_i4.p1,ppacificus@@@TRINITY_DN239_c0_g1_i5.p1,ppacificus@@@TRINITY_DN239_c0_g1_i6.p1
49	14	43	0.117	CEW1@@@TRINITY_DN105_c0_g1_i3.p1,CEW1@@@TRINITY_DN105_c0_g1_i5.p1,CEW1@@@TRINITY_DN105_c0_g1_i2.p1	DF5006@@@TRINITY_DN505_c0_g1_i3.p1,DF5006@@@TRINITY_DN505_c0_g1_i4.p1,DF5006@@@TRINITY_DN505_c0_g1_i1.p1,DF5006@@@TRINITY_DN505_c0_g1_i2.p1	DF5012@@@TRINITY_DN144_c0_g2_i6.p1,DF5012@@@TRINITY_DN144_c0_g2_i7.p1,DF5012@@@TRINITY_DN144_c0_g2_i3.p1,DF5012@@@TRINITY_DN144_c0_g2_i8.p1,DF5012@@@TRINITY_DN144_c0_g2_i10.p1,DF5012@@@TRINITY_DN144_c0_g2_i4.p1,DF5012@@@TRINITY_DN144_c0_g2_i12.p1,DF5012@@@TRINITY_DN144_c0_g2_i5.p1	DF5112@@@TRINITY_DN321_c0_g1_i5.p1,DF5112@@@TRINITY_DN321_c0_g1_i2.p1	MT8872@@@TRINITY_DN1727_c0_g1_i2.p1	T21G5.5d,T21G5.5c,T21G5.5b,T21G5.5a	cbrenneri@@@TRINITY_DN3933_c0_g1_i1.p1	cbriggsae@@@TRINITY_DN1210_c0_g1_i3.p1	celegans@@@TRINITY_DN298_c0_g1_i1.p1,celegans@@@TRINITY_DN298_c0_g1_i5.p1,celegans@@@TRINITY_DN298_c0_g1_i2.p1,celegans@@@TRINITY_DN298_c0_g1_i4.p1	celegans@@@TRINITY_GG_22213_c0_g1_i4.p1,celegans@@@TRINITY_GG_22213_c0_g1_i1.p1,celegans@@@TRINITY_GG_22213_c0_g1_i2.p1,celegans@@@TRINITY_GG_22213_c0_g1_i3.p1	cinopinata@@@TRINITY_DN342_c0_g1_i3.p1,cinopinata@@@TRINITY_DN342_c0_g1_i6.p1,cinopinata@@@TRINITY_DN342_c0_g1_i2.p1,cinopinata@@@TRINITY_DN342_c0_g1_i1.p1,cinopinata@@@TRINITY_DN342_c0_g1_i4.p1,cinopinata@@@TRINITY_DN342_c0_g1_i7.p1	cjaponica@@@TRINITY_DN98_c0_g2_i1.p1	cremanei@@@TRINITY_DN859_c0_g1_i3.p1,cremanei@@@TRINITY_DN859_c0_g1_i6.p1,cremanei@@@TRINITY_DN859_c0_g1_i7.p1	ppacificus@@@TRINITY_DN990_c0_g1_i1.p1
50	14	41	0.236	CEW1@@@TRINITY_DN2059_c0_g1_i8.p1,CEW1@@@TRINITY_DN2059_c0_g1_i3.p1,CEW1@@@TRINITY_DN2059_c0_g1_i6.p1	DF5006@@@TRINITY_DN2881_c0_g1_i6.p1,DF5006@@@TRINITY_DN2881_c0_g1_i10.p1	DF5012@@@TRINITY_DN2788_c0_g1_i1.p1,DF5012@@@TRINITY_DN2788_c0_g1_i3.p1	DF5112@@@TRINITY_DN5448_c0_g1_i20.p1,DF5112@@@TRINITY_DN5448_c0_g1_i32.p1,DF5112@@@TRINITY_DN5448_c0_g1_i27.p1,DF5112@@@TRINITY_DN5448_c0_g1_i38.p1,DF5112@@@TRINITY_DN5448_c0_g1_i17.p1,DF5112@@@TRINITY_DN5448_c0_g1_i22.p1,DF5112@@@TRINITY_DN5448_c0_g1_i40.p1	MT8872@@@TRINITY_DN1527_c0_g1_i4.p1	C30D11.1d,C30D11.1i,C30D11.1f,C30D11.1b,C30D11.1c,C30D11.1e,C30D11.1j,C30D11.1a	cbrenneri@@@TRINITY_DN9107_c0_g1_i4.p1,cbrenneri@@@TRINITY_DN9107_c0_g1_i7.p1	cbriggsae@@@TRINITY_DN4726_c0_g1_i1.p1,cbriggsae@@@TRINITY_DN4726_c0_g1_i2.p1	celegans@@@TRINITY_DN3684_c0_g1_i4.p1,celegans@@@TRINITY_DN3684_c0_g1_i6.p1,celegans@@@TRINITY_DN3684_c0_g1_i3.p1,celegans@@@TRINITY_DN3684_c0_g1_i1.p1	celegans@@@TRINITY_GG_9515_c0_g1_i1.p1	cinopinata@@@TRINITY_DN3461_c0_g1_i3.p1,cinopinata@@@TRINITY_DN3461_c0_g1_i5.p1,cinopinata@@@TRINITY_DN3461_c0_g1_i1.p1,cinopinata@@@TRINITY_DN3461_c0_g1_i8.p1	cjaponica@@@TRINITY_DN5520_c0_g1_i9.p1	cremanei@@@TRINITY_DN2815_c0_g1_i1.p1,cremanei@@@TRINITY_DN2815_c0_g1_i5.p1,cremanei@@@TRINITY_DN2815_c0_g1_i8.p1	ppacificus@@@TRINITY_DN6252_c0_g1_i3.p1
51	14	41	0.153	CEW1@@@TRINITY_DN869_c0_g2_i1.p1	DF5006@@@TRINITY_DN1126_c0_g1_i1.p1,DF5006@@@TRINITY_DN1126_c0_g1_i3.p1	DF5012@@@TRINITY_DN243_c0_g2_i2.p1,DF5012@@@TRINITY_DN243_c0_g2_i1.p1	DF5112@@@TRINITY_DN639_c0_g1_i2.p1,DF5112@@@TRINITY_DN639_c0_g1_i1.p1,DF5112@@@TRINITY_DN639_c0_g1_i3.p1	MT8872@@@TRINITY_DN494_c0_g1_i1.p1,MT8872@@@TRINITY_DN494_c0_g1_i2.p1,MT8872@@@TRINITY_DN494_c0_g1_i3.p1	F25H5.3d,F25H5.3e,F25H5.3a,F25H5.3b,F25H5.3c	cbrenneri@@@TRINITY_DN397_c0_g1_i1.p1,cbrenneri@@@TRINITY_DN397_c0_g1_i3.p1,cbrenneri@@@TRINITY_DN397_c0_g1_i2.p1	cbriggsae@@@TRINITY_DN231_c0_g1_i5.p1,cbriggsae@@@TRINITY_DN231_c0_g1_i4.p1,cbriggsae@@@TRINITY_DN231_c0_g1_i1.p1	celegans@@@TRINITY_DN605_c0_g1_i3.p1,celegans@@@TRINITY_DN605_c0_g1_i1.p1,celegans@@@TRINITY_DN605_c0_g1_i2.p1,celegans@@@TRINITY_DN605_c0_g1_i4.p1	celegans@@@TRINITY_GG_10380_c1_g1_i1.p1	cinopinata@@@TRINITY_DN349_c0_g1_i1.p1,cinopinata@@@TRINITY_DN349_c0_g1_i4.p1,cinopinata@@@TRINITY_DN349_c0_g1_i2.p1	cjaponica@@@TRINITY_DN119_c0_g1_i5.p1,cjaponica@@@TRINITY_DN119_c0_g1_i2.p1,cjaponica@@@TRINITY_DN119_c0_g1_i4.p1,cjaponica@@@TRINITY_DN119_c0_g1_i1.p1	cremanei@@@TRINITY_DN805_c0_g1_i1.p1,cremanei@@@TRINITY_DN805_c0_g1_i2.p1,cremanei@@@TRINITY_DN805_c0_g1_i3.p1,cremanei@@@TRINITY_DN805_c0_g1_i4.p1,cremanei@@@TRINITY_DN805_c0_g1_i6.p1,cremanei@@@TRINITY_DN805_c0_g1_i7.p1	ppacificus@@@TRINITY_DN957_c0_g5_i1.p1
52	14	40	0.633	CEW1@@@TRINITY_DN763_c0_g1_i4.p1,CEW1@@@TRINITY_DN763_c0_g1_i5.p1,CEW1@@@TRINITY_DN763_c0_g1_i6.p1	DF5006@@@TRINITY_DN501_c0_g1_i2.p1,DF5006@@@TRINITY_DN501_c0_g1_i3.p1,DF5006@@@TRINITY_DN501_c0_g1_i4.p1,DF5006@@@TRINITY_DN501_c0_g1_i5.p1	DF5012@@@TRINITY_DN582_c0_g1_i3.p1,DF5012@@@TRINITY_DN582_c0_g1_i6.p1,DF5012@@@TRINITY_DN582_c0_g1_i7.p1	DF5112@@@TRINITY_DN110_c0_g1_i4.p1,DF5112@@@TRINITY_DN110_c0_g1_i6.p1,DF5112@@@TRINITY_DN110_c0_g1_i9.p1	MT8872@@@TRINITY_DN1512_c0_g1_i1.p1	F46F11.1a	cbrenneri@@@TRINITY_DN3261_c0_g1_i2.p1,cbrenneri@@@TRINITY_DN3261_c0_g1_i3.p1,cbrenneri@@@TRINITY_DN3261_c0_g1_i4.p1,cbrenneri@@@TRINITY_DN3261_c0_g1_i5.p1	cbriggsae@@@TRINITY_DN2096_c0_g1_i1.p1,cbriggsae@@@TRINITY_DN2096_c0_g1_i5.p1	celegans@@@TRINITY_DN2146_c0_g1_i2.p1,celegans@@@TRINITY_DN2146_c0_g1_i6.p1	celegans@@@TRINITY_GG_10263_c0_g1_i5.p1	cinopinata@@@TRINITY_DN500_c0_g2_i4.p1	cjaponica@@@TRINITY_DN2246_c0_g1_i1.p1,cjaponica@@@TRINITY_DN2246_c0_g1_i8.p1,cjaponica@@@TRINITY_DN2246_c0_g1_i11.p1,cjaponica@@@TRINITY_DN2246_c0_g1_i3.p1,cjaponica@@@TRINITY_DN2246_c0_g1_i5.p1,cjaponica@@@TRINITY_DN2246_c0_g1_i7.p1	cremanei@@@TRINITY_DN2132_c0_g1_i1.p1,cremanei@@@TRINITY_DN2132_c0_g1_i7.p1,cremanei@@@TRINITY_DN2132_c0_g1_i8.p1,cremanei@@@TRINITY_DN2132_c0_g1_i9.p1,cremanei@@@TRINITY_DN2132_c0_g1_i11.p1,cremanei@@@TRINITY_DN2132_c0_g1_i12.p1,cremanei@@@TRINITY_DN2132_c0_g1_i2.p1,cremanei@@@TRINITY_DN2132_c0_g1_i3.p1	ppacificus@@@TRINITY_DN3290_c0_g3_i1.p1
53	14	40	0.459	CEW1@@@TRINITY_DN6231_c0_g1_i2.p1	DF5006@@@TRINITY_DN5562_c0_g1_i1.p1	DF5012@@@TRINITY_DN1310_c0_g1_i1.p1,DF5012@@@TRINITY_DN1310_c0_g1_i2.p1,DF5012@@@TRINITY_DN1310_c0_g1_i3.p1	DF5112@@@TRINITY_DN60_c1_g3_i1.p1,DF5112@@@TRINITY_DN60_c1_g3_i2.p1	MT8872@@@TRINITY_DN1302_c0_g1_i1.p1,MT8872@@@TRINITY_DN1302_c0_g1_i3.p1	H16O14.1d,H16O14.1c,H16O14.1a,H16O14.1b,H16O14.1e	cbrenneri@@@TRINITY_DN2298_c0_g1_i2.p1,cbrenneri@@@TRINITY_DN2298_c0_g1_i1.p1	cbriggsae@@@TRINITY_DN3682_c0_g2_i2.p1,cbriggsae@@@TRINITY_DN3682_c0_g2_i1.p1	celegans@@@TRINITY_DN1206_c0_g1_i1.p1,celegans@@@TRINITY_DN1206_c0_g1_i3.p1	celegans@@@TRINITY_GG_4084_c0_g1_i1.p1	cinopinata@@@TRINITY_DN7192_c0_g1_i2.p1,cinopinata@@@TRINITY_DN7192_c0_g1_i1.p1	cjaponica@@@TRINITY_DN4511_c0_g1_i1.p1,cjaponica@@@TRINITY_DN4511_c0_g1_i4.p1	cremanei@@@TRINITY_DN2841_c0_g1_i2.p1,cremanei@@@TRINITY_DN2841_c0_g1_i3.p1,cremanei@@@TRINITY_DN2841_c0_g1_i5.p1,cremanei@@@TRINITY_DN2841_c0_g1_i6.p1,cremanei@@@TRINITY_DN2841_c0_g1_i7.p1,cremanei@@@TRINITY_DN2841_c0_g1_i9.p1,cremanei@@@TRINITY_DN2841_c0_g1_i1.p1,cremanei@@@TRINITY_DN2841_c0_g1_i4.p1	ppacificus@@@TRINITY_DN6829_c0_g1_i13.p1,ppacificus@@@TRINITY_DN6829_c0_g1_i14.p1,ppacificus@@@TRINITY_DN6829_c0_g1_i2.p1,ppacificus@@@TRINITY_DN6829_c0_g1_i3.p1,ppacificus@@@TRINITY_DN6829_c0_g1_i5.p1,ppacificus@@@TRINITY_DN6829_c0_g1_i6.p1,ppacificus@@@TRINITY_DN6829_c0_g1_i7.p1
54	14	40	0.197	CEW1@@@TRINITY_DN670_c0_g1_i1.p1,CEW1@@@TRINITY_DN670_c0_g1_i2.p1	DF5006@@@TRINITY_DN4089_c0_g1_i6.p1,DF5006@@@TRINITY_DN4089_c0_g1_i3.p1,DF5006@@@TRINITY_DN4089_c0_g1_i7.p1,DF5006@@@TRINITY_DN4089_c0_g1_i1.p1,DF5006@@@TRINITY_DN4089_c0_g1_i2.p1,DF5006@@@TRINITY_DN4089_c0_g1_i4.p1,DF5006@@@TRINITY_DN4089_c0_g1_i5.p1	DF5012@@@TRINITY_DN816_c0_g1_i10.p1,DF5012@@@TRINITY_DN816_c0_g1_i12.p1,DF5012@@@TRINITY_DN816_c0_g1_i2.p1,DF5012@@@TRINITY_DN816_c0_g1_i3.p1,DF5012@@@TRINITY_DN816_c0_g1_i4.p1,DF5012@@@TRINITY_DN816_c0_g1_i9.p1	DF5112@@@TRINITY_DN3952_c1_g1_i3.p1,DF5112@@@TRINITY_DN3952_c1_g1_i1.p1	MT8872@@@TRINITY_DN10459_c0_g1_i1.p1	T08H4.1b,T08H4.1c	cbrenneri@@@TRINITY_DN9880_c0_g1_i1.p1,cbrenneri@@@TRINITY_DN9880_c0_g1_i3.p1,cbrenneri@@@TRINITY_DN9880_c0_g1_i4.p1	cbriggsae@@@TRINITY_DN9880_c0_g1_i2.p1,cbriggsae@@@TRINITY_DN9880_c0_g1_i1.p1	celegans@@@TRINITY_DN3191_c0_g1_i2.p1,celegans@@@TRINITY_DN3191_c0_g1_i4.p1,celegans@@@TRINITY_DN3191_c0_g1_i5.p1,celegans@@@TRINITY_DN3191_c0_g1_i3.p1	celegans@@@TRINITY_GG_1277_c0_g1_i1.p1	cinopinata@@@TRINITY_DN3749_c0_g1_i2.p1	cjaponica@@@TRINITY_DN2575_c0_g1_i2.p1,cjaponica@@@TRINITY_DN2575_c0_g1_i3.p1	cremanei@@@TRINITY_DN10169_c0_g1_i1.p1	ppacificus@@@TRINITY_DN5005_c0_g1_i2.p1,ppacificus@@@TRINITY_DN5005_c0_g1_i6.p1,ppacificus@@@TRINITY_DN5005_c0_g1_i8.p1,ppacificus@@@TRINITY_DN5005_c0_g1_i5.p1,ppacificus@@@TRINITY_DN5005_c0_g1_i3.p1,ppacificus@@@TRINITY_DN5005_c0_g1_i10.p1
55	14	40	0.169	CEW1@@@TRINITY_DN656_c0_g1_i3.p1,CEW1@@@TRINITY_DN656_c0_g1_i1.p1,CEW1@@@TRINITY_DN656_c0_g1_i2.p1,CEW1@@@TRINITY_DN656_c0_g1_i4.p1	DF5006@@@TRINITY_DN1993_c0_g1_i1.p1,DF5006@@@TRINITY_DN1993_c0_g1_i2.p1	DF5012@@@TRINITY_DN1563_c0_g1_i3.p1,DF5012@@@TRINITY_DN1563_c0_g1_i4.p1,DF5012@@@TRINITY_DN1563_c0_g1_i2.p1	DF5112@@@TRINITY_DN2496_c0_g1_i2.p1	MT8872@@@TRINITY_DN1032_c0_g1_i1.p1,MT8872@@@TRINITY_DN1032_c0_g1_i2.p1,MT8872@@@TRINITY_DN1032_c0_g1_i3.p1	W03D8.6a,W03D8.6b,W03D8.6c,W03D8.6d,W03D8.6e	cbrenneri@@@TRINITY_DN3054_c0_g1_i3.p1,cbrenneri@@@TRINITY_DN3054_c0_g1_i5.p1,cbrenneri@@@TRINITY_DN3054_c0_g1_i1.p1,cbrenneri@@@TRINITY_DN3054_c0_g1_i2.p1	cbriggsae@@@TRINITY_DN1009_c0_g1_i1.p1,cbriggsae@@@TRINITY_DN1009_c0_g1_i2.p1	celegans@@@TRINITY_DN1191_c0_g1_i2.p1,celegans@@@TRINITY_DN1191_c0_g1_i4.p1,celegans@@@TRINITY_DN1191_c0_g1_i3.p1	celegans@@@TRINITY_GG_11661_c0_g1_i1.p1,celegans@@@TRINITY_GG_11661_c0_g1_i3.p1	cinopinata@@@TRINITY_DN11849_c0_g2_i2.p1,cinopinata@@@TRINITY_DN11849_c0_g2_i3.p1,cinopinata@@@TRINITY_DN11849_c0_g2_i1.p1,cinopinata@@@TRINITY_DN11849_c0_g2_i4.p1	cjaponica@@@TRINITY_DN2720_c0_g1_i1.p1,cjaponica@@@TRINITY_DN2720_c0_g1_i4.p1	cremanei@@@TRINITY_DN3976_c0_g1_i4.p1,cremanei@@@TRINITY_DN3976_c0_g1_i5.p1	ppacificus@@@TRINITY_DN455_c0_g2_i1.p1,ppacificus@@@TRINITY_DN455_c0_g2_i5.p1,ppacificus@@@TRINITY_DN455_c0_g2_i2.p1
56	14	40	0.125	CEW1@@@TRINITY_DN963_c0_g1_i1.p1,CEW1@@@TRINITY_DN963_c0_g1_i4.p1,CEW1@@@TRINITY_DN963_c0_g1_i6.p1	DF5006@@@TRINITY_DN404_c0_g1_i10.p1,DF5006@@@TRINITY_DN404_c0_g1_i12.p1,DF5006@@@TRINITY_DN404_c0_g1_i15.p1,DF5006@@@TRINITY_DN404_c0_g1_i6.p1	DF5012@@@TRINITY_DN1498_c0_g1_i3.p1	DF5112@@@TRINITY_DN544_c0_g1_i6.p1,DF5112@@@TRINITY_DN544_c0_g1_i7.p1,DF5112@@@TRINITY_DN544_c0_g1_i10.p1,DF5112@@@TRINITY_DN544_c0_g1_i4.p1,DF5112@@@TRINITY_DN544_c0_g1_i11.p1,DF5112@@@TRINITY_DN544_c0_g1_i1.p1,DF5112@@@TRINITY_DN544_c0_g1_i12.p1,DF5112@@@TRINITY_DN544_c0_g1_i5.p1,DF5112@@@TRINITY_DN544_c0_g1_i2.p1,DF5112@@@TRINITY_DN544_c0_g1_i13.p1	MT8872@@@TRINITY_DN669_c0_g1_i2.p1,MT8872@@@TRINITY_DN669_c0_g1_i3.p1,MT8872@@@TRINITY_DN669_c0_g1_i4.p1	C34F11.3b,C34F11.3a,C34F11.3c	cbrenneri@@@TRINITY_DN1479_c0_g1_i5.p1,cbrenneri@@@TRINITY_DN1479_c0_g1_i4.p1	cbriggsae@@@TRINITY_DN587_c0_g1_i7.p1,cbriggsae@@@TRINITY_DN587_c0_g1_i1.p1,cbriggsae@@@TRINITY_DN587_c0_g1_i2.p1	celegans@@@TRINITY_DN1682_c0_g1_i4.p1,celegans@@@TRINITY_DN1682_c0_g1_i6.p1	celegans@@@TRINITY_GG_678_c5_g1_i1.p1	cinopinata@@@TRINITY_DN10050_c0_g1_i4.p1,cinopinata@@@TRINITY_DN10050_c0_g1_i7.p1	cjaponica@@@TRINITY_DN11045_c0_g1_i2.p1,cjaponica@@@TRINITY_DN11045_c0_g1_i3.p1	cremanei@@@TRINITY_DN3984_c0_g1_i2.p1,cremanei@@@TRINITY_DN3984_c0_g1_i1.p1	ppacificus@@@TRINITY_DN1983_c0_g1_i1.p1,ppacificus@@@TRINITY_DN1983_c0_g1_i3.p1
57	14	39	0.44	CEW1@@@TRINITY_DN1266_c0_g1_i1.p1,CEW1@@@TRINITY_DN1266_c0_g1_i2.p1	DF5006@@@TRINITY_DN949_c0_g1_i2.p1,DF5006@@@TRINITY_DN949_c0_g1_i3.p1,DF5006@@@TRINITY_DN949_c0_g1_i4.p1,DF5006@@@TRINITY_DN949_c0_g1_i5.p1	DF5012@@@TRINITY_DN2776_c0_g1_i2.p1,DF5012@@@TRINITY_DN2776_c0_g1_i3.p1	DF5112@@@TRINITY_DN943_c0_g1_i1.p1,DF5112@@@TRINITY_DN943_c0_g1_i2.p1,DF5112@@@TRINITY_DN943_c0_g1_i3.p1	MT8872@@@TRINITY_DN1757_c0_g1_i2.p1	F25B5.3b,F25B5.3d,F25B5.3a,F25B5.3c	cbrenneri@@@TRINITY_DN2622_c0_g1_i1.p1,cbrenneri@@@TRINITY_DN2622_c0_g1_i3.p1,cbrenneri@@@TRINITY_DN2622_c0_g1_i2.p1	cbriggsae@@@TRINITY_DN9221_c1_g2_i1.p1,cbriggsae@@@TRINITY_DN9221_c1_g2_i2.p1,cbriggsae@@@TRINITY_DN9221_c1_g2_i3.p1,cbriggsae@@@TRINITY_DN9221_c1_g2_i5.p1,cbriggsae@@@TRINITY_DN9221_c1_g2_i8.p1	celegans@@@TRINITY_DN983_c0_g1_i1.p1,celegans@@@TRINITY_DN983_c0_g1_i3.p1,celegans@@@TRINITY_DN983_c0_g1_i6.p1,celegans@@@TRINITY_DN983_c0_g1_i7.p1,celegans@@@TRINITY_DN983_c0_g1_i2.p1,celegans@@@TRINITY_DN983_c0_g1_i4.p1,celegans@@@TRINITY_DN983_c0_g1_i5.p1	celegans@@@TRINITY_GG_9281_c2_g1_i1.p1	cinopinata@@@TRINITY_DN5773_c0_g1_i1.p1	cjaponica@@@TRINITY_DN1608_c0_g1_i3.p1,cjaponica@@@TRINITY_DN1608_c0_g1_i4.p1	cremanei@@@TRINITY_DN23641_c0_g1_i1.p1,cremanei@@@TRINITY_DN23641_c0_g1_i2.p1,cremanei@@@TRINITY_DN23641_c0_g1_i3.p1	ppacificus@@@TRINITY_DN4639_c0_g1_i1.p1
58	14	39	0.426	CEW1@@@TRINITY_DN2364_c0_g1_i2.p1,CEW1@@@TRINITY_DN2364_c0_g1_i4.p1,CEW1@@@TRINITY_DN2364_c0_g1_i1.p1,CEW1@@@TRINITY_DN2364_c0_g1_i6.p1,CEW1@@@TRINITY_DN2364_c0_g1_i7.p1	DF5006@@@TRINITY_DN2175_c0_g1_i1.p1,DF5006@@@TRINITY_DN2175_c0_g1_i2.p1,DF5006@@@TRINITY_DN2175_c0_g1_i3.p1	DF5012@@@TRINITY_DN1721_c0_g1_i1.p1,DF5012@@@TRINITY_DN1721_c0_g1_i2.p1	DF5112@@@TRINITY_DN152_c1_g1_i2.p1,DF5112@@@TRINITY_DN152_c1_g1_i5.p1	MT8872@@@TRINITY_DN2628_c0_g1_i1.p1,MT8872@@@TRINITY_DN2628_c0_g1_i2.p1,MT8872@@@TRINITY_DN2628_c0_g1_i3.p1	ZK1067.1a,ZK1067.1b,ZK1067.1c,ZK1067.1d	cbrenneri@@@TRINITY_DN11357_c0_g1_i1.p1,cbrenneri@@@TRINITY_DN11357_c0_g1_i2.p1,cbrenneri@@@TRINITY_DN11357_c0_g1_i3.p1	cbriggsae@@@TRINITY_DN14149_c0_g1_i1.p1,cbriggsae@@@TRINITY_DN14149_c0_g1_i2.p1,cbriggsae@@@TRINITY_DN14149_c0_g1_i5.p1	celegans@@@TRINITY_DN6050_c0_g1_i5.p1	celegans@@@TRINITY_GG_704_c0_g1_i4.p1	cinopinata@@@TRINITY_DN206_c0_g1_i1.p1,cinopinata@@@TRINITY_DN206_c0_g1_i2.p1,cinopinata@@@TRINITY_DN206_c0_g1_i3.p1	cjaponica@@@TRINITY_DN5090_c0_g1_i6.p1	cremanei@@@TRINITY_DN3298_c0_g1_i1.p1,cremanei@@@TRINITY_DN3298_c0_g1_i2.p1,cremanei@@@TRINITY_DN3298_c0_g1_i4.p1,cremanei@@@TRINITY_DN3298_c0_g1_i7.p1,cremanei@@@TRINITY_DN3298_c0_g1_i8.p1	ppacificus@@@TRINITY_DN2283_c0_g1_i2.p1,ppacificus@@@TRINITY_DN2283_c0_g1_i7.p1,ppacificus@@@TRINITY_DN2283_c0_g1_i8.p1
59	14	39	0.129	CEW1@@@TRINITY_DN1489_c0_g2_i1.p1,CEW1@@@TRINITY_DN1489_c0_g1_i1.p1	DF5006@@@TRINITY_DN493_c0_g1_i1.p1,DF5006@@@TRINITY_DN493_c0_g2_i1.p1	DF5012@@@TRINITY_DN50_c0_g1_i1.p1,DF5012@@@TRINITY_DN50_c0_g2_i1.p2	DF5112@@@TRINITY_DN9499_c0_g1_i1.p1,DF5112@@@TRINITY_DN13335_c0_g1_i1.p1	MT8872@@@TRINITY_DN112_c0_g2_i1.p1,MT8872@@@TRINITY_DN112_c0_g2_i3.p1,MT8872@@@TRINITY_DN112_c0_g2_i2.p1,MT8872@@@TRINITY_DN112_c0_g2_i4.p1,MT8872@@@TRINITY_DN112_c0_g1_i1.p1	Y69E1A.2,C04G2.9,Y59E9AL.2,Y59E9AL.3	cbrenneri@@@TRINITY_DN523_c0_g1_i6.p1,cbrenneri@@@TRINITY_DN523_c0_g1_i3.p1,cbrenneri@@@TRINITY_DN523_c0_g1_i1.p1,cbrenneri@@@TRINITY_DN523_c0_g1_i2.p1	cbriggsae@@@TRINITY_DN815_c0_g3_i1.p2,cbriggsae@@@TRINITY_DN815_c0_g3_i4.p1,cbriggsae@@@TRINITY_DN815_c0_g1_i1.p1	celegans@@@TRINITY_DN173_c0_g2_i4.p1,celegans@@@TRINITY_DN173_c0_g2_i5.p1,celegans@@@TRINITY_DN173_c0_g2_i2.p1	celegans@@@TRINITY_GG_3472_c0_g1_i1.p1	cinopinata@@@TRINITY_DN972_c1_g1_i1.p1,cinopinata@@@TRINITY_DN19237_c0_g1_i1.p1	cjaponica@@@TRINITY_DN1711_c0_g1_i5.p1,cjaponica@@@TRINITY_DN1711_c0_g1_i7.p1,cjaponica@@@TRINITY_DN1711_c0_g1_i6.p1,cjaponica@@@TRINITY_DN1711_c0_g1_i11.p1,cjaponica@@@TRINITY_DN1711_c0_g1_i8.p1	cremanei@@@TRINITY_DN1672_c0_g1_i3.p1,cremanei@@@TRINITY_DN1672_c0_g1_i5.p1	ppacificus@@@TRINITY_DN27326_c0_g1_i1.p1,ppacificus@@@TRINITY_DN14734_c0_g1_i1.p2
60	14	39	0.113	CEW1@@@TRINITY_DN2324_c0_g1_i1.p1,CEW1@@@TRINITY_DN2324_c0_g1_i6.p1	DF5006@@@TRINITY_DN3731_c0_g2_i2.p1,DF5006@@@TRINITY_DN3731_c0_g2_i1.p1	DF5012@@@TRINITY_DN2102_c0_g1_i2.p1,DF5012@@@TRINITY_DN2102_c0_g1_i1.p1	DF5112@@@TRINITY_DN3084_c0_g1_i6.p1,DF5112@@@TRINITY_DN3084_c0_g1_i1.p1	MT8872@@@TRINITY_DN2666_c0_g1_i1.p1,MT8872@@@TRINITY_DN2666_c0_g1_i2.p1	C04G6.1a,C04G6.1c,C04G6.1b	cbrenneri@@@TRINITY_DN991_c0_g1_i1.p1,cbrenneri@@@TRINITY_DN991_c0_g1_i2.p1,cbrenneri@@@TRINITY_DN991_c0_g1_i3.p1,cbrenneri@@@TRINITY_DN991_c0_g1_i4.p1	cbriggsae@@@TRINITY_DN1887_c0_g1_i2.p1,cbriggsae@@@TRINITY_DN1887_c0_g1_i1.p1,cbriggsae@@@TRINITY_DN1887_c0_g1_i3.p1	celegans@@@TRINITY_DN3570_c0_g1_i3.p1,celegans@@@TRINITY_DN3570_c0_g1_i5.p1,celegans@@@TRINITY_DN3570_c0_g1_i1.p1,celegans@@@TRINITY_DN3570_c0_g1_i4.p1	celegans@@@TRINITY_GG_682_c0_g1_i1.p1,celegans@@@TRINITY_GG_682_c0_g1_i2.p1	cinopinata@@@TRINITY_DN1824_c0_g1_i1.p1,cinopinata@@@TRINITY_DN1824_c0_g1_i2.p1,cinopinata@@@TRINITY_DN1824_c0_g1_i3.p1	cjaponica@@@TRINITY_DN2209_c0_g1_i2.p1,cjaponica@@@TRINITY_DN2209_c0_g1_i10.p1	cremanei@@@TRINITY_DN2561_c0_g1_i3.p1,cremanei@@@TRINITY_DN2561_c0_g1_i1.p1,cremanei@@@TRINITY_DN2561_c0_g1_i2.p1,cremanei@@@TRINITY_DN2561_c0_g1_i6.p1,cremanei@@@TRINITY_DN2561_c0_g1_i4.p1,cremanei@@@TRINITY_DN2561_c0_g1_i5.p1	ppacificus@@@TRINITY_DN1643_c0_g2_i4.p1,ppacificus@@@TRINITY_DN1643_c0_g2_i5.p1
61	14	39	0.103	CEW1@@@TRINITY_DN3881_c0_g1_i1.p1,CEW1@@@TRINITY_DN3881_c0_g1_i2.p1	DF5006@@@TRINITY_DN2396_c0_g2_i1.p1,DF5006@@@TRINITY_DN2396_c0_g2_i2.p1	DF5012@@@TRINITY_DN511_c0_g1_i1.p1,DF5012@@@TRINITY_DN511_c0_g1_i3.p1,DF5012@@@TRINITY_DN511_c0_g1_i2.p1,DF5012@@@TRINITY_DN511_c0_g1_i4.p1	DF5112@@@TRINITY_DN1704_c0_g3_i1.p1,DF5112@@@TRINITY_DN1704_c0_g3_i2.p1	MT8872@@@TRINITY_DN3013_c0_g1_i1.p1,MT8872@@@TRINITY_DN3013_c0_g1_i2.p1	F28B4.2b,F28B4.2a	cbrenneri@@@TRINITY_DN4455_c0_g1_i1.p1,cbrenneri@@@TRINITY_DN4455_c0_g1_i3.p1,cbrenneri@@@TRINITY_DN4455_c0_g1_i4.p1	cbriggsae@@@TRINITY_DN4251_c0_g2_i2.p1,cbriggsae@@@TRINITY_DN4251_c0_g2_i3.p1,cbriggsae@@@TRINITY_DN4251_c0_g2_i1.p1,cbriggsae@@@TRINITY_DN4251_c0_g2_i4.p1	celegans@@@TRINITY_DN3618_c0_g1_i2.p1,celegans@@@TRINITY_DN3618_c0_g1_i3.p1,celegans@@@TRINITY_DN3618_c0_g1_i1.p1,celegans@@@TRINITY_DN3618_c0_g1_i4.p1	celegans@@@TRINITY_GG_17210_c0_g1_i1.p1	cinopinata@@@TRINITY_DN8059_c0_g2_i7.p1,cinopinata@@@TRINITY_DN8059_c0_g2_i3.p1,cinopinata@@@TRINITY_DN8059_c0_g2_i8.p1,cinopinata@@@TRINITY_DN8059_c0_g2_i6.p1	cjaponica@@@TRINITY_DN6756_c0_g2_i1.p1	cremanei@@@TRINITY_DN4616_c0_g1_i2.p1,cremanei@@@TRINITY_DN4616_c0_g1_i4.p1,cremanei@@@TRINITY_DN4616_c0_g1_i5.p1,cremanei@@@TRINITY_DN4616_c0_g1_i7.p1,cremanei@@@TRINITY_DN4616_c0_g1_i3.p1	ppacificus@@@TRINITY_DN1023_c1_g1_i1.p1,ppacificus@@@TRINITY_DN1023_c1_g1_i3.p1,ppacificus@@@TRINITY_DN1023_c1_g1_i2.p1
62	14	38	0.718	CEW1@@@TRINITY_DN1290_c0_g1_i2.p1	DF5006@@@TRINITY_DN9810_c0_g3_i2.p1	DF5012@@@TRINITY_DN7188_c0_g1_i1.p1,DF5012@@@TRINITY_DN7188_c0_g1_i2.p1,DF5012@@@TRINITY_DN7188_c0_g1_i3.p1	DF5112@@@TRINITY_DN481_c0_g1_i1.p1,DF5112@@@TRINITY_DN481_c0_g1_i2.p1	MT8872@@@TRINITY_DN124_c0_g1_i1.p1,MT8872@@@TRINITY_DN124_c0_g1_i2.p1	F57C7.2a,F57C7.2b	cbrenneri@@@TRINITY_DN3964_c0_g1_i2.p1,cbrenneri@@@TRINITY_DN3964_c0_g1_i3.p1,cbrenneri@@@TRINITY_DN3964_c0_g1_i4.p1	cbriggsae@@@TRINITY_DN1816_c0_g1_i1.p1,cbriggsae@@@TRINITY_DN1816_c0_g1_i3.p1,cbriggsae@@@TRINITY_DN1816_c0_g1_i4.p1	celegans@@@TRINITY_DN1171_c0_g1_i2.p1,celegans@@@TRINITY_DN1171_c0_g1_i3.p1,celegans@@@TRINITY_DN1171_c0_g1_i4.p1	celegans@@@TRINITY_GG_4735_c0_g1_i1.p1,celegans@@@TRINITY_GG_4735_c0_g1_i2.p1,celegans@@@TRINITY_GG_4735_c0_g1_i3.p1	cinopinata@@@TRINITY_DN1084_c0_g1_i1.p1,cinopinata@@@TRINITY_DN1084_c0_g1_i2.p1,cinopinata@@@TRINITY_DN1084_c0_g1_i3.p1,cinopinata@@@TRINITY_DN1084_c0_g1_i4.p1	cjaponica@@@TRINITY_DN1620_c0_g1_i1.p1,cjaponica@@@TRINITY_DN1620_c0_g1_i2.p1,cjaponica@@@TRINITY_DN1620_c0_g1_i3.p1	cremanei@@@TRINITY_DN5020_c0_g1_i1.p1,cremanei@@@TRINITY_DN5020_c0_g1_i2.p1,cremanei@@@TRINITY_DN5020_c0_g1_i3.p1,cremanei@@@TRINITY_DN5020_c0_g1_i4.p1	ppacificus@@@TRINITY_DN3951_c0_g1_i1.p1,ppacificus@@@TRINITY_DN3951_c0_g1_i4.p1,ppacificus@@@TRINITY_DN3951_c0_g1_i6.p1,ppacificus@@@TRINITY_DN3951_c0_g1_i8.p1
63	14	38	0.575	CEW1@@@TRINITY_DN1794_c0_g1_i1.p1,CEW1@@@TRINITY_DN1794_c0_g1_i2.p1	DF5006@@@TRINITY_DN614_c0_g1_i1.p1,DF5006@@@TRINITY_DN614_c0_g1_i2.p1	DF5012@@@TRINITY_DN3589_c0_g2_i1.p1	DF5112@@@TRINITY_DN99_c0_g1_i1.p1,DF5112@@@TRINITY_DN99_c0_g1_i2.p1	MT8872@@@TRINITY_DN4036_c0_g1_i1.p1	F42G9.6a,F42G9.6b,F42G9.6c	cbrenneri@@@TRINITY_DN81_c0_g1_i1.p1,cbrenneri@@@TRINITY_DN81_c0_g1_i3.p1	cbriggsae@@@TRINITY_DN1650_c0_g1_i1.p1,cbriggsae@@@TRINITY_DN1650_c0_g1_i2.p1	celegans@@@TRINITY_DN453_c0_g1_i2.p1,celegans@@@TRINITY_DN453_c0_g1_i5.p1,celegans@@@TRINITY_DN453_c0_g1_i8.p2,celegans@@@TRINITY_DN453_c0_g1_i9.p1,celegans@@@TRINITY_DN453_c0_g1_i1.p1,celegans@@@TRINITY_DN453_c0_g1_i10.p1,celegans@@@TRINITY_DN453_c0_g1_i3.p1,celegans@@@TRINITY_DN453_c0_g1_i4.p1,celegans@@@TRINITY_DN453_c0_g1_i6.p1,celegans@@@TRINITY_DN453_c0_g1_i7.p2	celegans@@@TRINITY_GG_20019_c0_g1_i2.p1,celegans@@@TRINITY_GG_20019_c0_g1_i3.p1,celegans@@@TRINITY_GG_20019_c0_g1_i6.p2,celegans@@@TRINITY_GG_20019_c0_g1_i1.p1,celegans@@@TRINITY_GG_20019_c0_g1_i4.p2,celegans@@@TRINITY_GG_20019_c0_g1_i7.p1	cinopinata@@@TRINITY_DN60_c0_g1_i2.p1,cinopinata@@@TRINITY_DN60_c0_g1_i3.p1	cjaponica@@@TRINITY_DN13852_c0_g1_i3.p1	cremanei@@@TRINITY_DN5848_c0_g1_i3.p2,cremanei@@@TRINITY_DN5848_c0_g1_i4.p2	ppacificus@@@TRINITY_DN696_c0_g1_i2.p1,ppacificus@@@TRINITY_DN696_c0_g1_i1.p1
64	14	38	0.358	CEW1@@@TRINITY_DN4997_c0_g1_i5.p1	DF5006@@@TRINITY_DN2983_c0_g1_i1.p1,DF5006@@@TRINITY_DN2983_c0_g1_i11.p1,DF5006@@@TRINITY_DN2983_c0_g1_i2.p1,DF5006@@@TRINITY_DN2983_c0_g1_i3.p1,DF5006@@@TRINITY_DN2983_c0_g1_i4.p1,DF5006@@@TRINITY_DN2983_c0_g1_i5.p1,DF5006@@@TRINITY_DN2983_c0_g1_i7.p1,DF5006@@@TRINITY_DN2983_c0_g1_i10.p1,DF5006@@@TRINITY_DN2983_c0_g1_i14.p1,DF5006@@@TRINITY_DN2983_c0_g1_i9.p1	DF5012@@@TRINITY_DN6594_c1_g1_i2.p1,DF5012@@@TRINITY_DN6594_c1_g1_i7.p1	DF5112@@@TRINITY_DN8713_c0_g1_i1.p1	MT8872@@@TRINITY_DN1041_c0_g1_i2.p1,MT8872@@@TRINITY_DN1041_c0_g1_i3.p1,MT8872@@@TRINITY_DN1041_c0_g1_i4.p1	D2092.1b,D2092.1a	cbrenneri@@@TRINITY_DN4994_c0_g1_i3.p1,cbrenneri@@@TRINITY_DN4994_c0_g1_i5.p1,cbrenneri@@@TRINITY_DN4994_c0_g1_i2.p1,cbrenneri@@@TRINITY_DN4994_c0_g1_i1.p1,cbrenneri@@@TRINITY_DN4994_c0_g1_i4.p1	cbriggsae@@@TRINITY_DN2233_c0_g1_i1.p1,cbriggsae@@@TRINITY_DN2233_c0_g1_i2.p1	celegans@@@TRINITY_DN834_c0_g2_i3.p1,celegans@@@TRINITY_DN834_c0_g2_i4.p1	celegans@@@TRINITY_GG_22768_c0_g1_i4.p1,celegans@@@TRINITY_GG_22768_c0_g1_i3.p1	cinopinata@@@TRINITY_DN13408_c0_g1_i3.p1,cinopinata@@@TRINITY_DN13408_c0_g1_i8.p1,cinopinata@@@TRINITY_DN13408_c0_g1_i2.p1	cjaponica@@@TRINITY_DN8663_c0_g1_i4.p1	cremanei@@@TRINITY_DN16639_c0_g1_i3.p1,cremanei@@@TRINITY_DN16639_c0_g1_i2.p1	ppacificus@@@TRINITY_DN16184_c0_g1_i1.p1,ppacificus@@@TRINITY_DN16184_c0_g1_i2.p1
65	14	38	0.352	CEW1@@@TRINITY_DN4711_c0_g1_i2.p1,CEW1@@@TRINITY_DN4711_c0_g1_i1.p1,CEW1@@@TRINITY_DN4711_c0_g1_i4.p1	DF5006@@@TRINITY_DN1004_c0_g1_i2.p1,DF5006@@@TRINITY_DN1004_c0_g1_i3.p1,DF5006@@@TRINITY_DN1004_c0_g1_i4.p1,DF5006@@@TRINITY_DN1004_c0_g1_i1.p1	DF5012@@@TRINITY_DN510_c0_g1_i1.p1,DF5012@@@TRINITY_DN510_c0_g1_i3.p1,DF5012@@@TRINITY_DN510_c0_g1_i4.p1	DF5112@@@TRINITY_DN1094_c0_g1_i1.p1,DF5112@@@TRINITY_DN1094_c0_g1_i2.p1	MT8872@@@TRINITY_DN804_c0_g1_i3.p1,MT8872@@@TRINITY_DN804_c0_g1_i4.p1	T04C9.6a,T04C9.6b	cbrenneri@@@TRINITY_DN6470_c0_g1_i1.p1,cbrenneri@@@TRINITY_DN6470_c0_g1_i2.p1,cbrenneri@@@TRINITY_DN6470_c0_g1_i4.p1	cbriggsae@@@TRINITY_DN924_c0_g1_i2.p1,cbriggsae@@@TRINITY_DN924_c0_g1_i3.p1	celegans@@@TRINITY_DN436_c0_g1_i1.p1,celegans@@@TRINITY_DN436_c0_g1_i2.p1,celegans@@@TRINITY_DN436_c0_g1_i3.p1	celegans@@@TRINITY_GG_19519_c0_g1_i1.p1,celegans@@@TRINITY_GG_19519_c0_g1_i2.p1,celegans@@@TRINITY_GG_19519_c0_g1_i3.p1	cinopinata@@@TRINITY_DN1554_c0_g1_i1.p1,cinopinata@@@TRINITY_DN1554_c0_g1_i2.p1	cjaponica@@@TRINITY_DN7626_c0_g2_i1.p1,cjaponica@@@TRINITY_DN7626_c0_g2_i2.p1,cjaponica@@@TRINITY_DN7626_c0_g2_i3.p1	cremanei@@@TRINITY_DN2102_c0_g2_i3.p1,cremanei@@@TRINITY_DN2102_c0_g2_i4.p1,cremanei@@@TRINITY_DN2102_c0_g2_i5.p1,cremanei@@@TRINITY_DN2102_c0_g2_i2.p1	ppacificus@@@TRINITY_DN4106_c0_g1_i2.p1,ppacificus@@@TRINITY_DN4106_c0_g1_i3.p1
66	14	38	0.275	CEW1@@@TRINITY_DN7509_c0_g1_i1.p1	DF5006@@@TRINITY_DN1951_c0_g1_i2.p1,DF5006@@@TRINITY_DN1951_c0_g1_i8.p1,DF5006@@@TRINITY_DN1951_c0_g1_i1.p1,DF5006@@@TRINITY_DN1951_c0_g1_i6.p1	DF5012@@@TRINITY_DN2114_c0_g1_i1.p1,DF5012@@@TRINITY_DN2114_c0_g1_i2.p1	DF5112@@@TRINITY_DN855_c0_g1_i1.p1,DF5112@@@TRINITY_DN855_c0_g1_i2.p1	MT8872@@@TRINITY_DN598_c0_g2_i1.p1,MT8872@@@TRINITY_DN598_c0_g2_i2.p1,MT8872@@@TRINITY_DN598_c0_g2_i3.p1	C18C4.10a,C18C4.10b,C18C4.10c	cbrenneri@@@TRINITY_DN16215_c0_g3_i2.p1,cbrenneri@@@TRINITY_DN16215_c0_g3_i1.p1,cbrenneri@@@TRINITY_DN16215_c0_g3_i3.p1	cbriggsae@@@TRINITY_DN784_c0_g1_i3.p1,cbriggsae@@@TRINITY_DN784_c0_g1_i1.p1,cbriggsae@@@TRINITY_DN784_c0_g1_i5.p1	celegans@@@TRINITY_DN810_c0_g1_i4.p1,celegans@@@TRINITY_DN810_c0_g1_i2.p1,celegans@@@TRINITY_DN810_c0_g1_i1.p1,celegans@@@TRINITY_DN810_c0_g1_i3.p1	celegans@@@TRINITY_GG_19219_c0_g1_i1.p1,celegans@@@TRINITY_GG_19219_c0_g1_i2.p1	cinopinata@@@TRINITY_DN1380_c0_g1_i1.p1	cjaponica@@@TRINITY_DN5537_c4_g1_i1.p1	cremanei@@@TRINITY_DN3477_c0_g1_i6.p1,cremanei@@@TRINITY_DN3477_c0_g1_i7.p1,cremanei@@@TRINITY_DN3477_c0_g1_i8.p1,cremanei@@@TRINITY_DN3477_c0_g1_i1.p1,cremanei@@@TRINITY_DN3477_c0_g1_i9.p1,cremanei@@@TRINITY_DN3477_c0_g1_i2.p1,cremanei@@@TRINITY_DN3477_c0_g1_i3.p1	ppacificus@@@TRINITY_DN3873_c0_g1_i2.p1,ppacificus@@@TRINITY_DN3873_c0_g1_i3.p2
67	14	38	0.23	CEW1@@@TRINITY_DN1198_c0_g1_i1.p1,CEW1@@@TRINITY_DN1198_c0_g1_i2.p1	DF5006@@@TRINITY_DN924_c0_g1_i10.p1,DF5006@@@TRINITY_DN924_c0_g1_i11.p1,DF5006@@@TRINITY_DN924_c0_g1_i4.p1	DF5012@@@TRINITY_DN1012_c0_g1_i1.p1,DF5012@@@TRINITY_DN1012_c0_g1_i2.p1	DF5112@@@TRINITY_DN2898_c0_g1_i2.p1,DF5112@@@TRINITY_DN2898_c0_g1_i1.p1	MT8872@@@TRINITY_DN17812_c0_g1_i1.p1	M03A1.6b,M03A1.6c,M03A1.6d,M03A1.6e,M03A1.6a	cbrenneri@@@TRINITY_DN4100_c0_g1_i1.p1,cbrenneri@@@TRINITY_DN4100_c0_g1_i2.p1	cbriggsae@@@TRINITY_DN5993_c0_g1_i3.p1,cbriggsae@@@TRINITY_DN5993_c0_g1_i4.p1,cbriggsae@@@TRINITY_DN5993_c0_g1_i1.p1,cbriggsae@@@TRINITY_DN5993_c0_g1_i2.p1,cbriggsae@@@TRINITY_DN5993_c0_g1_i5.p1	celegans@@@TRINITY_DN466_c0_g1_i2.p1,celegans@@@TRINITY_DN466_c0_g1_i3.p1,celegans@@@TRINITY_DN466_c0_g1_i1.p1,celegans@@@TRINITY_DN466_c0_g1_i4.p1	celegans@@@TRINITY_GG_13056_c0_g1_i2.p1,celegans@@@TRINITY_GG_13056_c0_g1_i1.p1	cinopinata@@@TRINITY_DN775_c1_g1_i7.p1,cinopinata@@@TRINITY_DN775_c1_g1_i10.p1,cinopinata@@@TRINITY_DN775_c1_g1_i6.p1	cjaponica@@@TRINITY_DN691_c0_g2_i4.p1	cremanei@@@TRINITY_DN3397_c0_g1_i1.p1,cremanei@@@TRINITY_DN3397_c0_g1_i4.p1,cremanei@@@TRINITY_DN3397_c0_g1_i3.p1	ppacificus@@@TRINITY_DN8120_c0_g1_i1.p1,ppacificus@@@TRINITY_DN8120_c0_g1_i3.p1,ppacificus@@@TRINITY_DN8120_c0_g1_i7.p1
68	14	38	0.223	CEW1@@@TRINITY_DN2502_c0_g1_i1.p1,CEW1@@@TRINITY_DN2502_c0_g1_i4.p1	DF5006@@@TRINITY_DN2737_c0_g1_i1.p1	DF5012@@@TRINITY_DN23457_c0_g1_i1.p1	DF5112@@@TRINITY_DN839_c0_g1_i1.p1,DF5112@@@TRINITY_DN839_c0_g1_i2.p1,DF5112@@@TRINITY_DN839_c0_g1_i3.p1,DF5112@@@TRINITY_DN839_c0_g1_i5.p1,DF5112@@@TRINITY_DN839_c0_g1_i6.p1,DF5112@@@TRINITY_DN839_c0_g1_i7.p1	MT8872@@@TRINITY_DN6346_c0_g1_i2.p1	F36H1.2b,F36H1.2f,F36H1.2g,F36H1.2i,F36H1.2a,F36H1.2c,F36H1.2e,F36H1.2h	cbrenneri@@@TRINITY_DN1859_c0_g1_i2.p1,cbrenneri@@@TRINITY_DN1859_c0_g1_i4.p1,cbrenneri@@@TRINITY_DN1859_c0_g1_i1.p1,cbrenneri@@@TRINITY_DN1859_c0_g1_i5.p1	cbriggsae@@@TRINITY_DN3451_c0_g1_i1.p1	celegans@@@TRINITY_DN1653_c0_g1_i1.p1,celegans@@@TRINITY_DN1653_c0_g1_i3.p1	celegans@@@TRINITY_GG_3470_c0_g1_i1.p1,celegans@@@TRINITY_GG_3470_c0_g1_i3.p1	cinopinata@@@TRINITY_DN3810_c0_g1_i1.p1,cinopinata@@@TRINITY_DN3810_c0_g1_i3.p1	cjaponica@@@TRINITY_DN6531_c2_g1_i2.p1,cjaponica@@@TRINITY_DN6531_c2_g1_i3.p1	cremanei@@@TRINITY_DN2783_c0_g1_i2.p1,cremanei@@@TRINITY_DN2783_c0_g1_i5.p1	ppacificus@@@TRINITY_DN4501_c0_g2_i1.p1,ppacificus@@@TRINITY_DN4501_c0_g2_i3.p1,ppacificus@@@TRINITY_DN4501_c0_g2_i4.p1,ppacificus@@@TRINITY_DN4501_c0_g2_i5.p1
69	14	38	0.166	CEW1@@@TRINITY_DN1436_c0_g1_i1.p1,CEW1@@@TRINITY_DN1436_c0_g1_i2.p1,CEW1@@@TRINITY_DN1436_c0_g1_i3.p1,CEW1@@@TRINITY_DN1436_c0_g1_i4.p1	DF5006@@@TRINITY_DN1162_c0_g1_i1.p1,DF5006@@@TRINITY_DN1162_c0_g1_i4.p1,DF5006@@@TRINITY_DN1162_c0_g1_i3.p1,DF5006@@@TRINITY_DN1162_c0_g1_i2.p1	DF5012@@@TRINITY_DN3255_c0_g1_i2.p1,DF5012@@@TRINITY_DN3255_c0_g1_i4.p1,DF5012@@@TRINITY_DN3255_c0_g1_i5.p1,DF5012@@@TRINITY_DN3255_c0_g1_i1.p1,DF5012@@@TRINITY_DN3255_c0_g1_i3.p1	DF5112@@@TRINITY_DN1829_c0_g2_i3.p1,DF5112@@@TRINITY_DN1829_c0_g2_i4.p1,DF5112@@@TRINITY_DN1829_c0_g2_i5.p1,DF5112@@@TRINITY_DN1829_c0_g2_i1.p1	MT8872@@@TRINITY_DN2544_c0_g1_i1.p1	D1044.2c,D1044.2a,D1044.2b	cbrenneri@@@TRINITY_DN6636_c0_g1_i4.p1,cbrenneri@@@TRINITY_DN6636_c0_g1_i6.p1,cbrenneri@@@TRINITY_DN6636_c0_g1_i5.p1,cbrenneri@@@TRINITY_DN6636_c0_g1_i2.p1	cbriggsae@@@TRINITY_DN8692_c0_g1_i1.p1	celegans@@@TRINITY_DN8543_c0_g1_i1.p1	celegans@@@TRINITY_GG_9696_c0_g1_i1.p1	cinopinata@@@TRINITY_DN5044_c0_g1_i2.p1	cjaponica@@@TRINITY_DN1079_c0_g1_i2.p1,cjaponica@@@TRINITY_DN1079_c0_g1_i4.p1,cjaponica@@@TRINITY_DN1079_c0_g1_i1.p1,cjaponica@@@TRINITY_DN1079_c0_g1_i3.p1,cjaponica@@@TRINITY_DN1079_c0_g1_i6.p1	cremanei@@@TRINITY_DN26749_c0_g1_i1.p1,cremanei@@@TRINITY_DN26749_c0_g1_i4.p1	ppacificus@@@TRINITY_DN4601_c0_g1_i1.p1,ppacificus@@@TRINITY_DN4601_c0_g1_i2.p1
70	14	38	0.161	CEW1@@@TRINITY_DN2595_c0_g1_i1.p1	DF5006@@@TRINITY_DN869_c0_g1_i3.p1,DF5006@@@TRINITY_DN869_c0_g1_i1.p1,DF5006@@@TRINITY_DN869_c0_g1_i2.p1	DF5012@@@TRINITY_DN2531_c0_g2_i1.p1	DF5112@@@TRINITY_DN312_c0_g1_i2.p1,DF5112@@@TRINITY_DN312_c0_g1_i4.p1,DF5112@@@TRINITY_DN312_c0_g1_i1.p1	MT8872@@@TRINITY_DN755_c0_g1_i1.p1,MT8872@@@TRINITY_DN755_c0_g1_i2.p1,MT8872@@@TRINITY_DN755_c0_g1_i4.p1	K09G1.1a,K09G1.1d,K09G1.1c,K09G1.1e,K09G1.1b	cbrenneri@@@TRINITY_DN8303_c0_g1_i2.p1,cbrenneri@@@TRINITY_DN8303_c0_g1_i1.p1	cbriggsae@@@TRINITY_DN766_c0_g1_i5.p1,cbriggsae@@@TRINITY_DN766_c0_g1_i3.p1,cbriggsae@@@TRINITY_DN766_c0_g1_i1.p1,cbriggsae@@@TRINITY_DN766_c0_g1_i2.p1	celegans@@@TRINITY_DN96_c0_g1_i5.p1,celegans@@@TRINITY_DN96_c0_g1_i4.p1,celegans@@@TRINITY_DN96_c0_g1_i6.p1,celegans@@@TRINITY_DN96_c0_g1_i1.p1,celegans@@@TRINITY_DN96_c0_g1_i3.p1,celegans@@@TRINITY_DN96_c0_g1_i2.p1	celegans@@@TRINITY_GG_7455_c0_g1_i1.p1,celegans@@@TRINITY_GG_7455_c0_g1_i3.p1,celegans@@@TRINITY_GG_7455_c0_g1_i2.p1	cinopinata@@@TRINITY_DN190_c0_g1_i1.p1,cinopinata@@@TRINITY_DN190_c0_g1_i2.p1	cjaponica@@@TRINITY_DN2946_c0_g2_i2.p1	cremanei@@@TRINITY_DN2762_c0_g1_i2.p1,cremanei@@@TRINITY_DN2762_c0_g1_i1.p1	ppacificus@@@TRINITY_DN392_c0_g1_i1.p1,ppacificus@@@TRINITY_DN392_c0_g1_i2.p1
71	14	38	0.142	CEW1@@@TRINITY_DN4030_c0_g1_i14.p1,CEW1@@@TRINITY_DN4030_c0_g1_i4.p1	DF5006@@@TRINITY_DN6022_c0_g1_i6.p1,DF5006@@@TRINITY_DN6022_c0_g1_i8.p1,DF5006@@@TRINITY_DN6022_c0_g1_i9.p1,DF5006@@@TRINITY_DN6022_c0_g1_i7.p1,DF5006@@@TRINITY_DN6022_c0_g1_i10.p1	DF5012@@@TRINITY_DN7389_c0_g1_i8.p1	DF5112@@@TRINITY_DN3624_c0_g1_i1.p1,DF5112@@@TRINITY_DN3624_c0_g1_i9.p1,DF5112@@@TRINITY_DN3624_c0_g1_i2.p1,DF5112@@@TRINITY_DN3624_c0_g1_i7.p1	MT8872@@@TRINITY_DN1543_c0_g1_i2.p1,MT8872@@@TRINITY_DN1543_c0_g1_i1.p1	T06H11.1c,T06H11.1f,T06H11.1b,T06H11.1e,T06H11.1a,T06H11.1d,T06H11.1g	cbrenneri@@@TRINITY_DN20349_c0_g1_i13.p1	cbriggsae@@@TRINITY_DN4943_c0_g1_i2.p1,cbriggsae@@@TRINITY_DN4943_c0_g1_i9.p1	celegans@@@TRINITY_DN2966_c0_g1_i2.p1,celegans@@@TRINITY_DN2966_c0_g1_i1.p1,celegans@@@TRINITY_DN2966_c0_g1_i3.p1,celegans@@@TRINITY_DN2966_c0_g1_i4.p1	celegans@@@TRINITY_GG_17006_c0_g1_i2.p1	cinopinata@@@TRINITY_DN6441_c0_g1_i2.p1,cinopinata@@@TRINITY_DN6441_c0_g1_i3.p1	cjaponica@@@TRINITY_DN18118_c0_g1_i2.p1	cremanei@@@TRINITY_DN7702_c0_g1_i6.p1,cremanei@@@TRINITY_DN7702_c0_g1_i4.p1	ppacificus@@@TRINITY_DN3830_c0_g1_i6.p1,ppacificus@@@TRINITY_DN3830_c0_g1_i7.p1,ppacificus@@@TRINITY_DN3830_c0_g1_i1.p1,ppacificus@@@TRINITY_DN3830_c0_g1_i2.p1
72	14	38	0.117	CEW1@@@TRINITY_DN205_c0_g2_i2.p1,CEW1@@@TRINITY_DN205_c0_g2_i1.p1	DF5006@@@TRINITY_DN6_c0_g1_i8.p1,DF5006@@@TRINITY_DN6_c0_g1_i2.p1,DF5006@@@TRINITY_DN6_c0_g1_i5.p1,DF5006@@@TRINITY_DN6_c0_g1_i1.p1,DF5006@@@TRINITY_DN6_c0_g1_i6.p1,DF5006@@@TRINITY_DN6_c0_g1_i3.p1	DF5012@@@TRINITY_DN71_c0_g1_i5.p1,DF5012@@@TRINITY_DN71_c0_g1_i9.p1	DF5112@@@TRINITY_DN4198_c0_g1_i1.p1	MT8872@@@TRINITY_DN5297_c1_g1_i1.p1	C42D8.2,K09F5.2,C04F6.1,F59D8.1,F59D8.2	cbrenneri@@@TRINITY_DN46_c0_g1_i3.p1,cbrenneri@@@TRINITY_DN46_c0_g1_i4.p1,cbrenneri@@@TRINITY_DN46_c0_g1_i6.p1	cbriggsae@@@TRINITY_DN158_c0_g1_i4.p1,cbriggsae@@@TRINITY_DN158_c0_g1_i3.p1,cbriggsae@@@TRINITY_DN158_c0_g1_i1.p1,cbriggsae@@@TRINITY_DN158_c0_g1_i2.p1,cbriggsae@@@TRINITY_DN158_c0_g1_i5.p1	celegans@@@TRINITY_DN341_c0_g1_i2.p1,celegans@@@TRINITY_DN341_c0_g1_i3.p1	celegans@@@TRINITY_GG_16665_c0_g1_i1.p1,celegans@@@TRINITY_GG_5544_c0_g1_i1.p1,celegans@@@TRINITY_GG_4843_c0_g1_i1.p1	cinopinata@@@TRINITY_DN317_c0_g1_i1.p1,cinopinata@@@TRINITY_DN317_c0_g1_i2.p1,cinopinata@@@TRINITY_DN6490_c0_g1_i1.p1	cjaponica@@@TRINITY_DN656_c0_g1_i1.p1,cjaponica@@@TRINITY_DN656_c0_g2_i2.p1	cremanei@@@TRINITY_DN214_c0_g1_i7.p1,cremanei@@@TRINITY_DN214_c0_g1_i8.p1	ppacificus@@@TRINITY_DN305_c1_g1_i1.p1
73	14	38	0.113	CEW1@@@TRINITY_DN3284_c0_g1_i1.p1,CEW1@@@TRINITY_DN3284_c0_g1_i2.p1	DF5006@@@TRINITY_DN13541_c0_g1_i1.p1	DF5012@@@TRINITY_DN5045_c0_g1_i1.p1,DF5012@@@TRINITY_DN5045_c0_g1_i2.p1,DF5012@@@TRINITY_DN5045_c0_g1_i3.p1,DF5012@@@TRINITY_DN5045_c0_g1_i4.p1	DF5112@@@TRINITY_DN1202_c0_g1_i1.p1,DF5112@@@TRINITY_DN1202_c0_g1_i2.p1,DF5112@@@TRINITY_DN1202_c0_g1_i3.p1	MT8872@@@TRINITY_DN2007_c0_g1_i3.p1,MT8872@@@TRINITY_DN2007_c0_g1_i4.p1	T23F1.7a,T23F1.7b,T23F1.7c	cbrenneri@@@TRINITY_DN2522_c0_g1_i1.p1,cbrenneri@@@TRINITY_DN2522_c0_g1_i2.p1	cbriggsae@@@TRINITY_DN2536_c0_g1_i1.p1,cbriggsae@@@TRINITY_DN2536_c0_g1_i2.p1	celegans@@@TRINITY_DN4294_c0_g1_i1.p1,celegans@@@TRINITY_DN4294_c0_g1_i2.p1	celegans@@@TRINITY_GG_6210_c0_g1_i2.p1,celegans@@@TRINITY_GG_6210_c0_g1_i1.p1	cinopinata@@@TRINITY_DN2370_c0_g1_i3.p1,cinopinata@@@TRINITY_DN2370_c0_g1_i1.p1,cinopinata@@@TRINITY_DN2370_c0_g1_i4.p1,cinopinata@@@TRINITY_DN2370_c0_g1_i5.p1,cinopinata@@@TRINITY_DN2370_c0_g1_i2.p1	cjaponica@@@TRINITY_DN8691_c0_g3_i4.p1,cjaponica@@@TRINITY_DN8691_c0_g3_i8.p1,cjaponica@@@TRINITY_DN8691_c0_g3_i3.p1	cremanei@@@TRINITY_DN13157_c0_g2_i3.p1,cremanei@@@TRINITY_DN13157_c0_g2_i4.p1,cremanei@@@TRINITY_DN13157_c0_g2_i1.p1	ppacificus@@@TRINITY_DN1190_c0_g1_i14.p1,ppacificus@@@TRINITY_DN1190_c0_g1_i12.p1,ppacificus@@@TRINITY_DN1190_c0_g1_i7.p1,ppacificus@@@TRINITY_DN1190_c0_g1_i8.p1
74	14	37	0.685	CEW1@@@TRINITY_DN7405_c0_g1_i2.p1,CEW1@@@TRINITY_DN7405_c0_g1_i3.p1	DF5006@@@TRINITY_DN9494_c0_g1_i1.p1,DF5006@@@TRINITY_DN9494_c0_g1_i2.p1	DF5012@@@TRINITY_DN2107_c0_g2_i1.p1,DF5012@@@TRINITY_DN2107_c0_g2_i2.p1	DF5112@@@TRINITY_DN686_c0_g1_i1.p1,DF5112@@@TRINITY_DN686_c0_g1_i2.p1,DF5112@@@TRINITY_DN686_c0_g1_i3.p1,DF5112@@@TRINITY_DN686_c0_g1_i4.p1	MT8872@@@TRINITY_DN2820_c0_g1_i1.p1	C34G6.6a,C34G6.6b,C34G6.6c	cbrenneri@@@TRINITY_DN1200_c0_g1_i1.p1,cbrenneri@@@TRINITY_DN1200_c0_g1_i2.p1,cbrenneri@@@TRINITY_DN1200_c0_g1_i3.p1,cbrenneri@@@TRINITY_DN1200_c0_g1_i4.p1	cbriggsae@@@TRINITY_DN3518_c0_g2_i1.p1,cbriggsae@@@TRINITY_DN3518_c0_g2_i2.p1,cbriggsae@@@TRINITY_DN3518_c0_g2_i3.p1	celegans@@@TRINITY_DN3953_c0_g1_i1.p1,celegans@@@TRINITY_DN3953_c0_g1_i2.p1,celegans@@@TRINITY_DN3953_c0_g1_i3.p1	celegans@@@TRINITY_GG_23173_c0_g1_i1.p1,celegans@@@TRINITY_GG_23173_c0_g1_i2.p1	cinopinata@@@TRINITY_DN2106_c0_g1_i1.p1,cinopinata@@@TRINITY_DN2106_c0_g1_i2.p1,cinopinata@@@TRINITY_DN2106_c0_g1_i3.p1	cjaponica@@@TRINITY_DN2540_c0_g1_i2.p1	cremanei@@@TRINITY_DN2454_c0_g1_i1.p1,cremanei@@@TRINITY_DN2454_c0_g1_i2.p1,cremanei@@@TRINITY_DN2454_c0_g1_i3.p1,cremanei@@@TRINITY_DN2454_c0_g1_i7.p1,cremanei@@@TRINITY_DN2454_c0_g1_i9.p1	ppacificus@@@TRINITY_DN4507_c0_g1_i1.p1,ppacificus@@@TRINITY_DN4507_c0_g1_i2.p1
75	14	37	0.227	CEW1@@@TRINITY_DN2194_c0_g1_i1.p1	DF5006@@@TRINITY_DN90_c0_g2_i3.p1,DF5006@@@TRINITY_DN90_c0_g2_i1.p1,DF5006@@@TRINITY_DN90_c0_g2_i2.p1	DF5012@@@TRINITY_DN525_c0_g1_i1.p1,DF5012@@@TRINITY_DN525_c0_g1_i2.p1	DF5112@@@TRINITY_DN145_c0_g1_i2.p1,DF5112@@@TRINITY_DN145_c0_g1_i1.p1	MT8872@@@TRINITY_DN473_c0_g1_i2.p1	R13A1.2d,R13A1.2c,R13A1.2e,R13A1.2a,R13A1.2b	cbrenneri@@@TRINITY_DN1725_c0_g1_i1.p1,cbrenneri@@@TRINITY_DN1725_c0_g1_i2.p1,cbrenneri@@@TRINITY_DN1725_c0_g1_i3.p1	cbriggsae@@@TRINITY_DN1151_c0_g1_i1.p1,cbriggsae@@@TRINITY_DN1151_c0_g1_i3.p1,cbriggsae@@@TRINITY_DN1151_c0_g1_i2.p1	celegans@@@TRINITY_DN2155_c0_g1_i2.p1,celegans@@@TRINITY_DN2155_c0_g1_i1.p1	celegans@@@TRINITY_GG_2258_c0_g1_i1.p1	cinopinata@@@TRINITY_DN686_c0_g1_i1.p1,cinopinata@@@TRINITY_DN686_c0_g1_i2.p1,cinopinata@@@TRINITY_DN686_c0_g1_i4.p1,cinopinata@@@TRINITY_DN686_c0_g1_i5.p1,cinopinata@@@TRINITY_DN686_c0_g1_i6.p1	cjaponica@@@TRINITY_DN101_c0_g1_i2.p1,cjaponica@@@TRINITY_DN101_c0_g1_i1.p1,cjaponica@@@TRINITY_DN101_c0_g1_i3.p1	cremanei@@@TRINITY_DN2992_c0_g1_i1.p1,cremanei@@@TRINITY_DN2992_c0_g1_i2.p1,cremanei@@@TRINITY_DN2992_c0_g1_i3.p1	ppacificus@@@TRINITY_DN1477_c0_g2_i1.p1,ppacificus@@@TRINITY_DN1477_c0_g2_i2.p1,ppacificus@@@TRINITY_DN1477_c0_g2_i4.p1
76	14	37	0.178	CEW1@@@TRINITY_DN1905_c0_g1_i2.p2,CEW1@@@TRINITY_DN1905_c0_g1_i3.p2,CEW1@@@TRINITY_DN1905_c0_g1_i1.p2	DF5006@@@TRINITY_DN349_c0_g1_i1.p1	DF5012@@@TRINITY_DN1822_c0_g1_i4.p1,DF5012@@@TRINITY_DN1822_c0_g1_i3.p1	DF5112@@@TRINITY_DN990_c0_g1_i3.p1,DF5112@@@TRINITY_DN990_c0_g1_i2.p1	MT8872@@@TRINITY_DN852_c0_g1_i5.p1,MT8872@@@TRINITY_DN852_c0_g1_i2.p1,MT8872@@@TRINITY_DN852_c0_g1_i4.p1	K07A1.9a,K07A1.9b,K07A1.9d	cbrenneri@@@TRINITY_DN4777_c0_g1_i1.p1,cbrenneri@@@TRINITY_DN4777_c0_g1_i3.p1	cbriggsae@@@TRINITY_DN1384_c0_g1_i2.p1,cbriggsae@@@TRINITY_DN1384_c0_g1_i1.p1,cbriggsae@@@TRINITY_DN1384_c0_g1_i3.p1	celegans@@@TRINITY_DN12157_c0_g1_i2.p1,celegans@@@TRINITY_DN12157_c0_g1_i1.p1	celegans@@@TRINITY_GG_21931_c0_g1_i2.p1,celegans@@@TRINITY_GG_21931_c0_g1_i1.p1,celegans@@@TRINITY_GG_21931_c0_g1_i5.p1	cinopinata@@@TRINITY_DN49_c0_g1_i2.p1,cinopinata@@@TRINITY_DN49_c0_g1_i1.p1	cjaponica@@@TRINITY_DN1466_c0_g1_i4.p1,cjaponica@@@TRINITY_DN1466_c0_g1_i5.p1	cremanei@@@TRINITY_DN3167_c0_g1_i12.p1,cremanei@@@TRINITY_DN3167_c0_g1_i16.p1,cremanei@@@TRINITY_DN3167_c0_g1_i4.p1,cremanei@@@TRINITY_DN3167_c0_g1_i11.p1,cremanei@@@TRINITY_DN3167_c0_g1_i10.p1,cremanei@@@TRINITY_DN3167_c0_g1_i14.p1,cremanei@@@TRINITY_DN3167_c0_g1_i3.p1,cremanei@@@TRINITY_DN3167_c0_g1_i5.p1	ppacificus@@@TRINITY_DN1909_c0_g3_i3.p1
77	14	37	0.164	CEW1@@@TRINITY_DN1005_c0_g1_i4.p1,CEW1@@@TRINITY_DN1005_c0_g1_i2.p1,CEW1@@@TRINITY_DN1005_c0_g1_i3.p1,CEW1@@@TRINITY_DN1005_c0_g1_i1.p1	DF5006@@@TRINITY_DN11837_c0_g1_i1.p1	DF5012@@@TRINITY_DN7087_c0_g1_i1.p1	DF5112@@@TRINITY_DN4_c0_g1_i1.p1,DF5112@@@TRINITY_DN4_c0_g1_i2.p1,DF5112@@@TRINITY_DN4_c0_g1_i3.p1	MT8872@@@TRINITY_DN4098_c0_g1_i1.p1,MT8872@@@TRINITY_DN4098_c0_g1_i2.p1,MT8872@@@TRINITY_DN4098_c0_g1_i3.p1	R10E12.1a,R10E12.1b,R10E12.1c	cbrenneri@@@TRINITY_DN1891_c0_g1_i1.p1,cbrenneri@@@TRINITY_DN1891_c0_g1_i2.p1	cbriggsae@@@TRINITY_DN269_c0_g1_i4.p1,cbriggsae@@@TRINITY_DN269_c0_g1_i1.p1,cbriggsae@@@TRINITY_DN269_c0_g1_i2.p1,cbriggsae@@@TRINITY_DN269_c0_g1_i5.p1,cbriggsae@@@TRINITY_DN269_c0_g1_i6.p1	celegans@@@TRINITY_DN2340_c0_g1_i2.p1,celegans@@@TRINITY_DN2340_c0_g1_i1.p1	celegans@@@TRINITY_GG_8528_c0_g1_i1.p1,celegans@@@TRINITY_GG_8528_c0_g1_i2.p1	cinopinata@@@TRINITY_DN2647_c0_g1_i1.p1,cinopinata@@@TRINITY_DN2647_c0_g1_i2.p1	cjaponica@@@TRINITY_DN788_c4_g1_i2.p1,cjaponica@@@TRINITY_DN788_c4_g1_i1.p1	cremanei@@@TRINITY_DN1986_c0_g1_i1.p1,cremanei@@@TRINITY_DN1986_c0_g1_i3.p1,cremanei@@@TRINITY_DN1986_c0_g1_i2.p1,cremanei@@@TRINITY_DN1986_c0_g1_i6.p1,cremanei@@@TRINITY_DN1986_c0_g1_i4.p1,cremanei@@@TRINITY_DN1986_c0_g1_i5.p1	ppacificus@@@TRINITY_DN13720_c1_g2_i1.p1
78	14	37	0.163	CEW1@@@TRINITY_DN454_c0_g1_i3.p1,CEW1@@@TRINITY_DN454_c0_g1_i1.p1,CEW1@@@TRINITY_DN454_c0_g1_i2.p1	DF5006@@@TRINITY_DN963_c0_g1_i1.p1,DF5006@@@TRINITY_DN963_c0_g1_i2.p1,DF5006@@@TRINITY_DN963_c0_g1_i3.p1	DF5012@@@TRINITY_DN878_c0_g1_i1.p1	DF5112@@@TRINITY_DN10823_c0_g1_i1.p1,DF5112@@@TRINITY_DN199_c0_g1_i3.p1,DF5112@@@TRINITY_DN199_c0_g1_i4.p1,DF5112@@@TRINITY_DN199_c0_g1_i1.p1,DF5112@@@TRINITY_DN199_c0_g1_i2.p1	MT8872@@@TRINITY_DN580_c0_g1_i1.p1,MT8872@@@TRINITY_DN580_c0_g1_i2.p1	C12D8.1b,C12D8.1a,C12D8.1c	cbrenneri@@@TRINITY_DN3269_c0_g1_i1.p1,cbrenneri@@@TRINITY_DN3269_c0_g1_i3.p1	cbriggsae@@@TRINITY_DN2933_c0_g3_i1.p1,cbriggsae@@@TRINITY_DN2933_c0_g3_i2.p1	celegans@@@TRINITY_DN725_c0_g1_i3.p1,celegans@@@TRINITY_DN725_c0_g1_i2.p1,celegans@@@TRINITY_DN725_c0_g1_i1.p1	celegans@@@TRINITY_GG_18760_c0_g1_i1.p1,celegans@@@TRINITY_GG_18760_c0_g1_i2.p1	cinopinata@@@TRINITY_DN2854_c0_g1_i1.p1,cinopinata@@@TRINITY_DN2854_c0_g1_i4.p1,cinopinata@@@TRINITY_DN2854_c0_g1_i2.p1,cinopinata@@@TRINITY_DN2854_c0_g1_i3.p1	cjaponica@@@TRINITY_DN2257_c0_g1_i3.p1,cjaponica@@@TRINITY_DN2257_c0_g1_i2.p1	cremanei@@@TRINITY_DN3704_c0_g1_i1.p1,cremanei@@@TRINITY_DN3704_c0_g1_i2.p1,cremanei@@@TRINITY_DN3704_c0_g1_i3.p1	ppacificus@@@TRINITY_DN1452_c0_g2_i1.p1,ppacificus@@@TRINITY_DN1452_c0_g2_i2.p1
79	14	37	0.154	CEW1@@@TRINITY_DN1592_c0_g1_i3.p1,CEW1@@@TRINITY_DN1592_c0_g1_i4.p1,CEW1@@@TRINITY_DN1592_c0_g1_i1.p1	DF5006@@@TRINITY_DN138_c0_g1_i1.p1,DF5006@@@TRINITY_DN138_c0_g1_i2.p1,DF5006@@@TRINITY_DN138_c0_g1_i3.p1,DF5006@@@TRINITY_DN138_c0_g1_i4.p1	DF5012@@@TRINITY_DN5209_c0_g1_i1.p1	DF5112@@@TRINITY_DN375_c0_g1_i1.p1,DF5112@@@TRINITY_DN375_c0_g1_i2.p1	MT8872@@@TRINITY_DN4337_c0_g1_i1.p1	M03D4.1e,M03D4.1f,M03D4.1a,M03D4.1c,M03D4.1b,M03D4.1d	cbrenneri@@@TRINITY_DN662_c0_g1_i1.p1,cbrenneri@@@TRINITY_DN662_c0_g1_i2.p1	cbriggsae@@@TRINITY_DN155_c0_g1_i2.p1,cbriggsae@@@TRINITY_DN155_c0_g1_i1.p1,cbriggsae@@@TRINITY_DN155_c0_g1_i3.p1	celegans@@@TRINITY_DN390_c0_g1_i2.p1,celegans@@@TRINITY_DN390_c0_g1_i1.p1	celegans@@@TRINITY_GG_4085_c0_g1_i1.p1,celegans@@@TRINITY_GG_4085_c0_g1_i3.p1	cinopinata@@@TRINITY_DN515_c0_g1_i2.p1,cinopinata@@@TRINITY_DN515_c0_g1_i1.p1,cinopinata@@@TRINITY_DN515_c0_g1_i3.p1,cinopinata@@@TRINITY_DN515_c0_g1_i5.p1	cjaponica@@@TRINITY_DN8465_c0_g1_i1.p1,cjaponica@@@TRINITY_DN8465_c0_g1_i2.p1	cremanei@@@TRINITY_DN2956_c0_g1_i3.p1,cremanei@@@TRINITY_DN2956_c0_g1_i4.p1,cremanei@@@TRINITY_DN2956_c0_g1_i5.p1	ppacificus@@@TRINITY_DN1659_c0_g1_i2.p1,ppacificus@@@TRINITY_DN1659_c0_g1_i5.p1
80	14	37	0.151	CEW1@@@TRINITY_DN968_c0_g1_i1.p1,CEW1@@@TRINITY_DN968_c0_g1_i3.p1,CEW1@@@TRINITY_DN6622_c0_g1_i1.p1	DF5006@@@TRINITY_DN2878_c0_g1_i3.p1,DF5006@@@TRINITY_DN2878_c0_g1_i4.p1	DF5012@@@TRINITY_DN4566_c0_g1_i1.p1,DF5012@@@TRINITY_DN2800_c0_g1_i1.p1,DF5012@@@TRINITY_DN2800_c0_g1_i3.p1	DF5112@@@TRINITY_DN2108_c0_g1_i2.p1	MT8872@@@TRINITY_DN3610_c0_g1_i1.p1,MT8872@@@TRINITY_DN3610_c0_g1_i2.p1	F42A6.7a,F42A6.7d	cbrenneri@@@TRINITY_DN841_c0_g1_i2.p1,cbrenneri@@@TRINITY_DN841_c0_g1_i4.p1,cbrenneri@@@TRINITY_DN841_c0_g1_i1.p1,cbrenneri@@@TRINITY_DN841_c0_g1_i3.p1	cbriggsae@@@TRINITY_DN450_c0_g1_i1.p1,cbriggsae@@@TRINITY_DN450_c0_g1_i2.p1,cbriggsae@@@TRINITY_DN450_c0_g1_i3.p1	celegans@@@TRINITY_DN447_c0_g1_i3.p1,celegans@@@TRINITY_DN447_c0_g1_i1.p1,celegans@@@TRINITY_DN447_c0_g1_i2.p1	celegans@@@TRINITY_GG_15426_c0_g1_i1.p1,celegans@@@TRINITY_GG_15426_c0_g1_i2.p1	cinopinata@@@TRINITY_DN4013_c0_g1_i1.p1,cinopinata@@@TRINITY_DN4013_c0_g1_i3.p1	cjaponica@@@TRINITY_DN774_c0_g2_i11.p1,cjaponica@@@TRINITY_DN774_c0_g2_i10.p2,cjaponica@@@TRINITY_DN774_c0_g2_i8.p1,cjaponica@@@TRINITY_DN774_c0_g2_i2.p1	cremanei@@@TRINITY_DN86_c0_g1_i1.p1,cremanei@@@TRINITY_DN86_c0_g1_i3.p1,cremanei@@@TRINITY_DN86_c0_g1_i2.p1	ppacificus@@@TRINITY_DN1064_c0_g1_i1.p1,ppacificus@@@TRINITY_DN1691_c0_g1_i1.p1,ppacificus@@@TRINITY_DN1691_c0_g3_i1.p1
81	14	37	0.115	CEW1@@@TRINITY_DN18963_c0_g1_i1.p1	DF5006@@@TRINITY_DN1137_c0_g1_i1.p1,DF5006@@@TRINITY_DN1137_c0_g1_i2.p1,DF5006@@@TRINITY_DN3208_c0_g1_i1.p1,DF5006@@@TRINITY_DN3208_c0_g1_i2.p1	DF5012@@@TRINITY_DN21334_c0_g1_i1.p1,DF5012@@@TRINITY_DN16010_c0_g1_i1.p1	DF5112@@@TRINITY_DN12342_c0_g1_i1.p1	MT8872@@@TRINITY_DN20357_c0_g1_i1.p1,MT8872@@@TRINITY_DN8044_c0_g1_i1.p1	W01B6.2,C04G2.2	cbrenneri@@@TRINITY_DN5734_c0_g1_i1.p1,cbrenneri@@@TRINITY_DN5734_c0_g1_i2.p1,cbrenneri@@@TRINITY_DN31541_c0_g1_i1.p1	cbriggsae@@@TRINITY_DN557_c0_g1_i2.p1,cbriggsae@@@TRINITY_DN11266_c0_g1_i1.p1,cbriggsae@@@TRINITY_DN557_c0_g2_i2.p1,cbriggsae@@@TRINITY_DN557_c0_g2_i3.p1,cbriggsae@@@TRINITY_DN557_c0_g1_i1.p1	celegans@@@TRINITY_DN7176_c0_g1_i1.p1,celegans@@@TRINITY_DN11466_c0_g1_i1.p1	celegans@@@TRINITY_GG_15110_c0_g1_i1.p1,celegans@@@TRINITY_GG_3431_c0_g1_i1.p1	cinopinata@@@TRINITY_DN22201_c0_g1_i1.p1,cinopinata@@@TRINITY_DN7772_c0_g2_i1.p1,cinopinata@@@TRINITY_DN5267_c0_g1_i1.p1,cinopinata@@@TRINITY_DN5267_c0_g1_i3.p1	cjaponica@@@TRINITY_DN9534_c0_g2_i2.p1,cjaponica@@@TRINITY_DN1278_c0_g1_i1.p1,cjaponica@@@TRINITY_DN1278_c0_g1_i2.p1	cremanei@@@TRINITY_DN16134_c0_g1_i1.p1,cremanei@@@TRINITY_DN28737_c0_g1_i1.p1	ppacificus@@@TRINITY_DN25141_c0_g1_i1.p1,ppacificus@@@TRINITY_DN689_c0_g4_i1.p1,ppacificus@@@TRINITY_DN689_c0_g2_i1.p1,ppacificus@@@TRINITY_DN689_c0_g5_i1.p1
82	14	36	0.656	CEW1@@@TRINITY_DN280_c0_g1_i1.p1,CEW1@@@TRINITY_DN280_c0_g1_i2.p1,CEW1@@@TRINITY_DN280_c0_g1_i3.p1,CEW1@@@TRINITY_DN280_c0_g1_i4.p1,CEW1@@@TRINITY_DN280_c0_g1_i5.p1	DF5006@@@TRINITY_DN515_c0_g1_i1.p1,DF5006@@@TRINITY_DN515_c0_g1_i2.p1,DF5006@@@TRINITY_DN515_c0_g1_i3.p1,DF5006@@@TRINITY_DN515_c0_g1_i4.p1,DF5006@@@TRINITY_DN515_c0_g1_i5.p1,DF5006@@@TRINITY_DN515_c0_g1_i6.p1	DF5012@@@TRINITY_DN441_c0_g1_i1.p1,DF5012@@@TRINITY_DN441_c0_g1_i2.p1	DF5112@@@TRINITY_DN3811_c0_g1_i1.p1,DF5112@@@TRINITY_DN3811_c0_g1_i2.p1	MT8872@@@TRINITY_DN308_c0_g1_i10.p1,MT8872@@@TRINITY_DN308_c0_g1_i2.p1,MT8872@@@TRINITY_DN308_c0_g1_i4.p1,MT8872@@@TRINITY_DN308_c0_g1_i5.p1,MT8872@@@TRINITY_DN308_c0_g1_i6.p2,MT8872@@@TRINITY_DN308_c0_g1_i9.p1	Y110A7A.6a,Y110A7A.6b	cbrenneri@@@TRINITY_DN2687_c1_g1_i2.p1	cbriggsae@@@TRINITY_DN1180_c0_g1_i2.p1,cbriggsae@@@TRINITY_DN1180_c0_g1_i3.p1	celegans@@@TRINITY_DN8650_c0_g1_i1.p1	celegans@@@TRINITY_GG_10362_c0_g1_i1.p1	cinopinata@@@TRINITY_DN4090_c0_g1_i2.p1,cinopinata@@@TRINITY_DN4090_c0_g1_i5.p1,cinopinata@@@TRINITY_DN4090_c0_g1_i6.p1	cjaponica@@@TRINITY_DN5825_c0_g1_i1.p1	cremanei@@@TRINITY_DN2580_c0_g2_i2.p1	ppacificus@@@TRINITY_DN12375_c0_g2_i1.p1,ppacificus@@@TRINITY_DN12375_c0_g2_i2.p1,ppacificus@@@TRINITY_DN12375_c0_g2_i3.p1
83	14	36	0.506	CEW1@@@TRINITY_DN1470_c0_g1_i1.p1,CEW1@@@TRINITY_DN1470_c0_g1_i2.p1	DF5006@@@TRINITY_DN1633_c1_g2_i1.p1,DF5006@@@TRINITY_DN1633_c1_g2_i2.p1	DF5012@@@TRINITY_DN2292_c0_g1_i1.p1,DF5012@@@TRINITY_DN2292_c0_g1_i2.p1,DF5012@@@TRINITY_DN2292_c0_g1_i3.p1	DF5112@@@TRINITY_DN655_c0_g1_i1.p1,DF5112@@@TRINITY_DN655_c0_g1_i2.p1	MT8872@@@TRINITY_DN251_c0_g1_i1.p1,MT8872@@@TRINITY_DN251_c0_g1_i2.p1	T04B8.5a,T04B8.5b,T04B8.5d	cbrenneri@@@TRINITY_DN4568_c0_g1_i1.p1,cbrenneri@@@TRINITY_DN4568_c0_g1_i2.p1	cbriggsae@@@TRINITY_DN266_c0_g1_i2.p1	celegans@@@TRINITY_DN807_c0_g1_i1.p1,celegans@@@TRINITY_DN807_c0_g1_i2.p1	celegans@@@TRINITY_GG_12494_c0_g1_i1.p1,celegans@@@TRINITY_GG_12494_c0_g1_i2.p1	cinopinata@@@TRINITY_DN3963_c0_g1_i2.p1,cinopinata@@@TRINITY_DN3963_c0_g1_i6.p1	cjaponica@@@TRINITY_DN18301_c0_g1_i1.p1,cjaponica@@@TRINITY_DN18301_c0_g1_i2.p1	cremanei@@@TRINITY_DN10950_c0_g1_i1.p1,cremanei@@@TRINITY_DN10950_c0_g1_i2.p1,cremanei@@@TRINITY_DN10950_c0_g1_i5.p1,cremanei@@@TRINITY_DN10950_c0_g1_i8.p1,cremanei@@@TRINITY_DN10950_c0_g1_i3.p1,cremanei@@@TRINITY_DN10950_c0_g1_i7.p1,cremanei@@@TRINITY_DN10950_c0_g1_i4.p1,cremanei@@@TRINITY_DN10950_c0_g1_i6.p1	ppacificus@@@TRINITY_DN5256_c0_g1_i1.p1,ppacificus@@@TRINITY_DN5256_c0_g1_i2.p1,ppacificus@@@TRINITY_DN5256_c0_g1_i3.p1
84	14	36	0.399	CEW1@@@TRINITY_DN19876_c0_g1_i1.p1	DF5006@@@TRINITY_DN750_c0_g1_i1.p1,DF5006@@@TRINITY_DN750_c0_g1_i3.p1	DF5012@@@TRINITY_DN3140_c0_g1_i1.p1	DF5112@@@TRINITY_DN2871_c0_g1_i2.p1,DF5112@@@TRINITY_DN2871_c0_g1_i1.p1	MT8872@@@TRINITY_DN195_c0_g1_i2.p1	Y65B4BL.5c,Y65B4BL.5a,Y65B4BL.5b	cbrenneri@@@TRINITY_DN1457_c0_g1_i2.p1,cbrenneri@@@TRINITY_DN1457_c0_g1_i3.p1	cbriggsae@@@TRINITY_DN425_c0_g1_i3.p1,cbriggsae@@@TRINITY_DN425_c0_g1_i1.p1,cbriggsae@@@TRINITY_DN425_c0_g1_i2.p1	celegans@@@TRINITY_DN435_c0_g1_i2.p1,celegans@@@TRINITY_DN435_c0_g1_i3.p1	celegans@@@TRINITY_GG_22267_c0_g1_i1.p1,celegans@@@TRINITY_GG_22267_c0_g1_i2.p1,celegans@@@TRINITY_GG_22267_c0_g1_i3.p1	cinopinata@@@TRINITY_DN133_c0_g1_i1.p1,cinopinata@@@TRINITY_DN133_c0_g1_i5.p1,cinopinata@@@TRINITY_DN133_c0_g1_i6.p1,cinopinata@@@TRINITY_DN133_c0_g1_i4.p1,cinopinata@@@TRINITY_DN133_c0_g1_i3.p1	cjaponica@@@TRINITY_DN3764_c0_g1_i2.p1,cjaponica@@@TRINITY_DN3764_c0_g1_i1.p1,cjaponica@@@TRINITY_DN3764_c0_g1_i3.p1	cremanei@@@TRINITY_DN17119_c0_g1_i1.p1,cremanei@@@TRINITY_DN17119_c0_g1_i2.p1,cremanei@@@TRINITY_DN17119_c0_g1_i3.p1,cremanei@@@TRINITY_DN17119_c0_g1_i4.p1	ppacificus@@@TRINITY_DN536_c0_g2_i1.p1,ppacificus@@@TRINITY_DN536_c0_g2_i2.p1,ppacificus@@@TRINITY_DN536_c0_g2_i3.p1,ppacificus@@@TRINITY_DN9025_c0_g1_i1.p1
85	14	36	0.362	CEW1@@@TRINITY_DN748_c0_g1_i1.p1,CEW1@@@TRINITY_DN748_c0_g1_i2.p1,CEW1@@@TRINITY_DN748_c0_g1_i3.p1	DF5006@@@TRINITY_DN908_c0_g1_i1.p1,DF5006@@@TRINITY_DN908_c0_g1_i2.p1,DF5006@@@TRINITY_DN908_c0_g1_i3.p1,DF5006@@@TRINITY_DN908_c0_g1_i4.p1	DF5012@@@TRINITY_DN1588_c0_g1_i1.p1,DF5012@@@TRINITY_DN1588_c0_g1_i3.p1,DF5012@@@TRINITY_DN1588_c0_g1_i4.p1	DF5112@@@TRINITY_DN1086_c0_g1_i2.p1,DF5112@@@TRINITY_DN1086_c0_g1_i1.p1,DF5112@@@TRINITY_DN1086_c0_g1_i3.p1	MT8872@@@TRINITY_DN2964_c0_g1_i1.p1	F52B5.1a,F52B5.1b,F52B5.1c	cbrenneri@@@TRINITY_DN1101_c0_g1_i2.p1,cbrenneri@@@TRINITY_DN1101_c0_g1_i1.p1,cbrenneri@@@TRINITY_DN1101_c0_g1_i3.p1	cbriggsae@@@TRINITY_DN1185_c0_g1_i1.p1,cbriggsae@@@TRINITY_DN1185_c0_g1_i2.p1	celegans@@@TRINITY_DN4053_c0_g1_i1.p1,celegans@@@TRINITY_DN4053_c0_g1_i2.p1	celegans@@@TRINITY_GG_22946_c0_g1_i1.p1,celegans@@@TRINITY_GG_22946_c0_g1_i2.p1	cinopinata@@@TRINITY_DN1382_c0_g1_i1.p1,cinopinata@@@TRINITY_DN1382_c0_g1_i2.p1,cinopinata@@@TRINITY_DN1382_c0_g1_i3.p1	cjaponica@@@TRINITY_DN3835_c1_g3_i1.p1,cjaponica@@@TRINITY_DN3835_c1_g3_i2.p1	cremanei@@@TRINITY_DN11373_c0_g1_i2.p1,cremanei@@@TRINITY_DN11373_c0_g1_i1.p1,cremanei@@@TRINITY_DN11373_c0_g1_i4.p1	ppacificus@@@TRINITY_DN21378_c0_g1_i3.p1,ppacificus@@@TRINITY_DN21378_c0_g1_i4.p1
86	14	36	0.316	CEW1@@@TRINITY_DN4156_c0_g1_i1.p1	DF5006@@@TRINITY_DN3220_c0_g1_i1.p1,DF5006@@@TRINITY_DN3220_c0_g1_i3.p1,DF5006@@@TRINITY_DN3220_c0_g1_i2.p1	DF5012@@@TRINITY_DN4266_c0_g1_i2.p1,DF5012@@@TRINITY_DN4266_c0_g1_i5.p1	DF5112@@@TRINITY_DN1836_c0_g1_i3.p1,DF5112@@@TRINITY_DN1836_c0_g1_i2.p1	MT8872@@@TRINITY_DN1603_c0_g1_i3.p1,MT8872@@@TRINITY_DN1603_c0_g1_i4.p1,MT8872@@@TRINITY_DN1603_c0_g1_i6.p1,MT8872@@@TRINITY_DN1603_c0_g1_i9.p1	T04D3.3a,T04D3.3b	cbrenneri@@@TRINITY_DN6588_c0_g1_i1.p1,cbrenneri@@@TRINITY_DN6588_c0_g1_i2.p1	cbriggsae@@@TRINITY_DN2866_c0_g1_i6.p1,cbriggsae@@@TRINITY_DN2866_c0_g1_i2.p1,cbriggsae@@@TRINITY_DN2866_c0_g1_i4.p1	celegans@@@TRINITY_DN4808_c0_g1_i3.p1,celegans@@@TRINITY_DN4808_c0_g1_i1.p1,celegans@@@TRINITY_DN4808_c0_g1_i2.p1	celegans@@@TRINITY_GG_22401_c0_g1_i1.p1,celegans@@@TRINITY_GG_22401_c0_g1_i2.p1	cinopinata@@@TRINITY_DN2258_c0_g1_i2.p1,cinopinata@@@TRINITY_DN2258_c0_g1_i1.p1,cinopinata@@@TRINITY_DN2258_c0_g1_i4.p1	cjaponica@@@TRINITY_DN2518_c0_g1_i2.p1,cjaponica@@@TRINITY_DN2518_c0_g1_i1.p1	cremanei@@@TRINITY_DN6134_c0_g1_i8.p1,cremanei@@@TRINITY_DN6134_c0_g1_i6.p1,cremanei@@@TRINITY_DN6134_c0_g1_i4.p1,cremanei@@@TRINITY_DN6134_c0_g1_i10.p1	ppacificus@@@TRINITY_DN3972_c0_g1_i1.p1,ppacificus@@@TRINITY_DN3972_c0_g1_i3.p1,ppacificus@@@TRINITY_DN3972_c0_g1_i6.p1
87	14	36	0.292	CEW1@@@TRINITY_DN1577_c0_g1_i1.p1,CEW1@@@TRINITY_DN1577_c0_g1_i2.p1	DF5006@@@TRINITY_DN409_c0_g1_i1.p1,DF5006@@@TRINITY_DN409_c0_g1_i2.p1	DF5012@@@TRINITY_DN598_c0_g1_i1.p1,DF5012@@@TRINITY_DN598_c0_g1_i2.p1	DF5112@@@TRINITY_DN189_c0_g6_i2.p1,DF5112@@@TRINITY_DN189_c0_g6_i1.p1	MT8872@@@TRINITY_DN610_c0_g1_i7.p1	Y46E12BL.4b,Y46E12BL.4f,Y46E12BL.4e,Y46E12BL.4g,Y46E12BL.4i,Y46E12BL.4c,Y46E12BL.4h	cbrenneri@@@TRINITY_DN6003_c0_g1_i2.p1,cbrenneri@@@TRINITY_DN6003_c0_g1_i3.p1	cbriggsae@@@TRINITY_DN990_c0_g1_i4.p1,cbriggsae@@@TRINITY_DN990_c0_g1_i6.p1,cbriggsae@@@TRINITY_DN990_c0_g1_i3.p1,cbriggsae@@@TRINITY_DN990_c0_g1_i9.p1	celegans@@@TRINITY_DN13111_c0_g1_i1.p1,celegans@@@TRINITY_DN13111_c0_g1_i3.p1	celegans@@@TRINITY_GG_1559_c0_g1_i2.p1,celegans@@@TRINITY_GG_1559_c0_g1_i1.p1	cinopinata@@@TRINITY_DN348_c0_g2_i1.p1,cinopinata@@@TRINITY_DN348_c0_g2_i3.p1,cinopinata@@@TRINITY_DN348_c0_g2_i2.p1	cjaponica@@@TRINITY_DN6550_c0_g2_i2.p1,cjaponica@@@TRINITY_DN6550_c0_g2_i3.p1,cjaponica@@@TRINITY_DN6550_c0_g2_i4.p1	cremanei@@@TRINITY_DN22113_c0_g2_i3.p1,cremanei@@@TRINITY_DN22113_c0_g2_i1.p1	ppacificus@@@TRINITY_DN4527_c0_g1_i2.p1,ppacificus@@@TRINITY_DN4527_c0_g1_i3.p1
88	14	36	0.199	CEW1@@@TRINITY_DN11838_c0_g1_i1.p1,CEW1@@@TRINITY_DN11838_c0_g1_i4.p1,CEW1@@@TRINITY_DN11838_c0_g1_i7.p1,CEW1@@@TRINITY_DN11838_c0_g1_i9.p1,CEW1@@@TRINITY_DN11838_c0_g1_i3.p1,CEW1@@@TRINITY_DN11838_c0_g1_i6.p1	DF5006@@@TRINITY_DN1225_c0_g1_i3.p1	DF5012@@@TRINITY_DN935_c0_g1_i3.p1,DF5012@@@TRINITY_DN935_c0_g1_i1.p1	DF5112@@@TRINITY_DN842_c0_g1_i2.p1,DF5112@@@TRINITY_DN842_c0_g1_i1.p1,DF5112@@@TRINITY_DN842_c0_g1_i4.p1	MT8872@@@TRINITY_DN1445_c0_g1_i1.p1,MT8872@@@TRINITY_DN1445_c0_g1_i3.p1	C02C6.1a,C02C6.1b	cbrenneri@@@TRINITY_DN566_c0_g2_i2.p1,cbrenneri@@@TRINITY_DN566_c0_g2_i1.p1	cbriggsae@@@TRINITY_DN3260_c0_g1_i1.p1,cbriggsae@@@TRINITY_DN3260_c0_g1_i3.p1,cbriggsae@@@TRINITY_DN3886_c0_g1_i1.p1	celegans@@@TRINITY_DN4027_c0_g1_i1.p1,celegans@@@TRINITY_DN4027_c0_g1_i3.p1	celegans@@@TRINITY_GG_4394_c0_g1_i1.p1	cinopinata@@@TRINITY_DN850_c0_g1_i4.p1	cjaponica@@@TRINITY_DN1313_c0_g1_i1.p1,cjaponica@@@TRINITY_DN1313_c0_g1_i4.p1,cjaponica@@@TRINITY_DN1313_c0_g1_i2.p1,cjaponica@@@TRINITY_DN1313_c0_g1_i3.p1,cjaponica@@@TRINITY_DN1313_c0_g1_i5.p1	cremanei@@@TRINITY_DN2870_c0_g1_i3.p1,cremanei@@@TRINITY_DN2870_c0_g1_i4.p1,cremanei@@@TRINITY_DN2870_c0_g1_i5.p1	ppacificus@@@TRINITY_DN1781_c0_g1_i4.p1,ppacificus@@@TRINITY_DN1781_c0_g1_i5.p1,ppacificus@@@TRINITY_DN1781_c0_g1_i6.p1
89	14	36	0.199	CEW1@@@TRINITY_DN1458_c0_g1_i1.p1,CEW1@@@TRINITY_DN1458_c0_g1_i5.p1,CEW1@@@TRINITY_DN1458_c0_g1_i6.p1	DF5006@@@TRINITY_DN2844_c0_g1_i2.p1,DF5006@@@TRINITY_DN2844_c0_g1_i4.p1,DF5006@@@TRINITY_DN2844_c0_g1_i1.p1,DF5006@@@TRINITY_DN2844_c0_g1_i3.p1	DF5012@@@TRINITY_DN6897_c0_g1_i1.p1,DF5012@@@TRINITY_DN6897_c0_g1_i2.p1	DF5112@@@TRINITY_DN590_c0_g1_i1.p1,DF5112@@@TRINITY_DN590_c0_g1_i2.p1	MT8872@@@TRINITY_DN2768_c0_g1_i1.p1,MT8872@@@TRINITY_DN2768_c0_g1_i2.p1	C52E12.2a,C52E12.2b	cbrenneri@@@TRINITY_DN11470_c0_g1_i3.p1,cbrenneri@@@TRINITY_DN11470_c0_g1_i4.p1,cbrenneri@@@TRINITY_DN11470_c0_g1_i8.p1,cbrenneri@@@TRINITY_DN11470_c0_g1_i9.p1	cbriggsae@@@TRINITY_DN3383_c0_g1_i2.p1,cbriggsae@@@TRINITY_DN3383_c0_g1_i3.p1	celegans@@@TRINITY_DN3355_c0_g1_i1.p1,celegans@@@TRINITY_DN3355_c0_g1_i3.p1,celegans@@@TRINITY_DN3355_c0_g1_i6.p1	celegans@@@TRINITY_GG_242_c0_g1_i2.p1,celegans@@@TRINITY_GG_242_c0_g1_i4.p1,celegans@@@TRINITY_GG_242_c0_g1_i1.p1,celegans@@@TRINITY_GG_242_c0_g1_i3.p1	cinopinata@@@TRINITY_DN2134_c0_g1_i1.p1,cinopinata@@@TRINITY_DN2134_c0_g1_i3.p1,cinopinata@@@TRINITY_DN2134_c0_g1_i4.p1	cjaponica@@@TRINITY_DN4715_c0_g1_i1.p1,cjaponica@@@TRINITY_DN4715_c0_g1_i2.p1	cremanei@@@TRINITY_DN10529_c0_g1_i1.p1,cremanei@@@TRINITY_DN10529_c0_g1_i5.p1	ppacificus@@@TRINITY_DN3739_c0_g2_i2.p1
90	14	36	0.186	CEW1@@@TRINITY_DN1386_c0_g1_i3.p1,CEW1@@@TRINITY_DN1386_c0_g1_i4.p1,CEW1@@@TRINITY_DN1386_c0_g1_i5.p1,CEW1@@@TRINITY_DN1386_c0_g1_i2.p1	DF5006@@@TRINITY_DN655_c0_g1_i1.p1,DF5006@@@TRINITY_DN655_c0_g1_i2.p1,DF5006@@@TRINITY_DN655_c0_g1_i3.p1	DF5012@@@TRINITY_DN283_c0_g1_i3.p1,DF5012@@@TRINITY_DN283_c0_g1_i1.p1,DF5012@@@TRINITY_DN283_c0_g1_i5.p1	DF5112@@@TRINITY_DN1415_c0_g1_i2.p1,DF5112@@@TRINITY_DN1415_c0_g1_i1.p1,DF5112@@@TRINITY_DN1415_c0_g1_i5.p1	MT8872@@@TRINITY_DN1116_c1_g3_i1.p1	F32A5.2b,F32A5.2a	cbrenneri@@@TRINITY_DN6068_c0_g1_i1.p1,cbrenneri@@@TRINITY_DN6068_c0_g1_i2.p1,cbrenneri@@@TRINITY_DN6068_c0_g1_i3.p1	cbriggsae@@@TRINITY_DN1200_c0_g1_i1.p1,cbriggsae@@@TRINITY_DN1200_c0_g1_i5.p1	celegans@@@TRINITY_DN38_c0_g1_i1.p1,celegans@@@TRINITY_DN38_c0_g1_i2.p1	celegans@@@TRINITY_GG_1626_c0_g1_i2.p1,celegans@@@TRINITY_GG_1626_c0_g1_i1.p1	cinopinata@@@TRINITY_DN977_c0_g1_i1.p1,cinopinata@@@TRINITY_DN977_c0_g1_i4.p1,cinopinata@@@TRINITY_DN977_c0_g1_i2.p1	cjaponica@@@TRINITY_DN2951_c0_g1_i1.p1,cjaponica@@@TRINITY_DN2951_c0_g1_i2.p1,cjaponica@@@TRINITY_DN2951_c0_g1_i3.p1	cremanei@@@TRINITY_DN3320_c0_g1_i1.p1,cremanei@@@TRINITY_DN3320_c0_g1_i3.p1,cremanei@@@TRINITY_DN3320_c0_g1_i5.p1	ppacificus@@@TRINITY_DN8009_c0_g1_i2.p1,ppacificus@@@TRINITY_DN8009_c0_g1_i4.p1
91	14	36	0.116	CEW1@@@TRINITY_DN21_c0_g1_i1.p1	DF5006@@@TRINITY_DN665_c0_g3_i1.p1	DF5012@@@TRINITY_DN138_c0_g2_i2.p1,DF5012@@@TRINITY_DN138_c0_g2_i8.p1	DF5112@@@TRINITY_DN746_c0_g1_i1.p1,DF5112@@@TRINITY_DN746_c0_g1_i2.p1	MT8872@@@TRINITY_DN7_c0_g1_i1.p1,MT8872@@@TRINITY_DN7_c0_g1_i2.p1	F38B2.1a,F38B2.1b,F38B2.1c,F38B2.1d,F38B2.1e	cbrenneri@@@TRINITY_DN990_c0_g2_i1.p1,cbrenneri@@@TRINITY_DN990_c0_g2_i4.p1,cbrenneri@@@TRINITY_DN990_c0_g2_i5.p1,cbrenneri@@@TRINITY_DN990_c0_g2_i2.p1	cbriggsae@@@TRINITY_DN168_c0_g1_i3.p1,cbriggsae@@@TRINITY_DN168_c0_g1_i2.p1,cbriggsae@@@TRINITY_DN168_c0_g1_i1.p1	celegans@@@TRINITY_DN16_c0_g1_i2.p1,celegans@@@TRINITY_DN16_c0_g1_i3.p1,celegans@@@TRINITY_DN16_c0_g1_i4.p1,celegans@@@TRINITY_DN16_c0_g1_i1.p1	celegans@@@TRINITY_GG_4097_c0_g1_i1.p1	cinopinata@@@TRINITY_DN3811_c0_g1_i1.p1,cinopinata@@@TRINITY_DN3811_c0_g1_i2.p1	cjaponica@@@TRINITY_DN112_c0_g1_i4.p1,cjaponica@@@TRINITY_DN112_c0_g1_i1.p1,cjaponica@@@TRINITY_DN112_c0_g1_i2.p1,cjaponica@@@TRINITY_DN112_c0_g1_i3.p1	cremanei@@@TRINITY_DN9178_c0_g2_i1.p1,cremanei@@@TRINITY_DN9178_c0_g2_i2.p1,cremanei@@@TRINITY_DN9178_c0_g2_i3.p1	ppacificus@@@TRINITY_DN787_c0_g2_i2.p1,ppacificus@@@TRINITY_DN787_c0_g2_i3.p1
92	14	35	0.63	CEW1@@@TRINITY_DN1336_c0_g1_i1.p1,CEW1@@@TRINITY_DN1336_c0_g1_i3.p1,CEW1@@@TRINITY_DN6208_c0_g1_i1.p1	DF5006@@@TRINITY_DN4283_c0_g1_i1.p1,DF5006@@@TRINITY_DN4283_c0_g1_i2.p1,DF5006@@@TRINITY_DN4283_c0_g1_i3.p1,DF5006@@@TRINITY_DN4283_c0_g1_i4.p1,DF5006@@@TRINITY_DN4283_c0_g1_i5.p1,DF5006@@@TRINITY_DN4283_c0_g1_i7.p1	DF5012@@@TRINITY_DN1483_c0_g1_i1.p1,DF5012@@@TRINITY_DN1483_c0_g1_i2.p1	DF5112@@@TRINITY_DN357_c0_g1_i1.p1,DF5112@@@TRINITY_DN357_c0_g1_i2.p1	MT8872@@@TRINITY_DN214_c0_g1_i2.p1,MT8872@@@TRINITY_DN214_c0_g1_i3.p1,MT8872@@@TRINITY_DN214_c0_g1_i4.p1	Y57E12AL.1a,Y57E12AL.1b	cbrenneri@@@TRINITY_DN1786_c0_g1_i1.p1,cbrenneri@@@TRINITY_DN1786_c0_g1_i2.p1	cbriggsae@@@TRINITY_DN1127_c0_g1_i1.p1,cbriggsae@@@TRINITY_DN1127_c0_g1_i2.p1	celegans@@@TRINITY_DN721_c0_g1_i1.p1,celegans@@@TRINITY_DN721_c0_g1_i2.p1	celegans@@@TRINITY_GG_6236_c0_g1_i1.p1,celegans@@@TRINITY_GG_6236_c0_g1_i2.p1	cinopinata@@@TRINITY_DN337_c0_g1_i1.p1,cinopinata@@@TRINITY_DN337_c0_g1_i2.p1	cjaponica@@@TRINITY_DN18850_c0_g1_i1.p1,cjaponica@@@TRINITY_DN18850_c0_g1_i2.p1	cremanei@@@TRINITY_DN889_c0_g1_i1.p1,cremanei@@@TRINITY_DN889_c0_g1_i2.p1	ppacificus@@@TRINITY_DN405_c0_g1_i1.p1,ppacificus@@@TRINITY_DN405_c0_g1_i3.p1,ppacificus@@@TRINITY_DN405_c0_g1_i4.p1
93	14	35	0.596	CEW1@@@TRINITY_DN170_c0_g1_i1.p1,CEW1@@@TRINITY_DN170_c0_g1_i2.p1,CEW1@@@TRINITY_DN170_c0_g1_i3.p1	DF5006@@@TRINITY_DN430_c0_g1_i1.p1,DF5006@@@TRINITY_DN430_c0_g1_i5.p1,DF5006@@@TRINITY_DN430_c0_g1_i9.p1	DF5012@@@TRINITY_DN9966_c0_g5_i1.p1,DF5012@@@TRINITY_DN9966_c0_g5_i2.p1	DF5112@@@TRINITY_DN895_c0_g1_i1.p1,DF5112@@@TRINITY_DN895_c0_g1_i2.p1,DF5112@@@TRINITY_DN895_c0_g1_i3.p1	MT8872@@@TRINITY_DN453_c0_g1_i1.p1,MT8872@@@TRINITY_DN453_c0_g1_i2.p1	F40F9.1a,F40F9.1b	cbrenneri@@@TRINITY_DN938_c0_g1_i1.p1,cbrenneri@@@TRINITY_DN938_c0_g1_i3.p1	cbriggsae@@@TRINITY_DN1823_c0_g2_i1.p1,cbriggsae@@@TRINITY_DN1823_c0_g2_i2.p1,cbriggsae@@@TRINITY_DN1823_c0_g2_i3.p1	celegans@@@TRINITY_DN962_c0_g1_i1.p1,celegans@@@TRINITY_DN962_c0_g1_i2.p1	celegans@@@TRINITY_GG_7452_c0_g1_i1.p1,celegans@@@TRINITY_GG_7452_c0_g1_i2.p1	cinopinata@@@TRINITY_DN276_c0_g1_i1.p1,cinopinata@@@TRINITY_DN276_c0_g1_i2.p1,cinopinata@@@TRINITY_DN276_c0_g1_i3.p1,cinopinata@@@TRINITY_DN276_c0_g1_i4.p1	cjaponica@@@TRINITY_DN14012_c0_g1_i1.p1,cjaponica@@@TRINITY_DN14012_c0_g1_i2.p1	cremanei@@@TRINITY_DN3831_c0_g2_i1.p1,cremanei@@@TRINITY_DN3831_c0_g2_i2.p1,cremanei@@@TRINITY_DN3831_c0_g2_i3.p1	ppacificus@@@TRINITY_DN1860_c0_g2_i1.p1,ppacificus@@@TRINITY_DN1860_c0_g2_i4.p1
94	14	35	0.546	CEW1@@@TRINITY_DN627_c0_g2_i1.p1,CEW1@@@TRINITY_DN627_c0_g2_i3.p1	DF5006@@@TRINITY_DN457_c0_g1_i1.p1,DF5006@@@TRINITY_DN457_c0_g1_i2.p1	DF5012@@@TRINITY_DN1674_c0_g1_i2.p1	DF5112@@@TRINITY_DN771_c0_g1_i3.p1,DF5112@@@TRINITY_DN771_c0_g1_i5.p1,DF5112@@@TRINITY_DN771_c0_g1_i1.p1	MT8872@@@TRINITY_DN892_c0_g1_i1.p1,MT8872@@@TRINITY_DN892_c0_g1_i3.p1,MT8872@@@TRINITY_DN892_c0_g1_i2.p1	F47B7.2b	cbrenneri@@@TRINITY_DN1345_c0_g1_i1.p1,cbrenneri@@@TRINITY_DN1345_c0_g1_i3.p1,cbrenneri@@@TRINITY_DN1345_c0_g1_i2.p1	cbriggsae@@@TRINITY_DN4300_c0_g1_i2.p1,cbriggsae@@@TRINITY_DN4300_c0_g1_i3.p1,cbriggsae@@@TRINITY_DN4300_c0_g1_i1.p1,cbriggsae@@@TRINITY_DN4300_c0_g1_i4.p1	celegans@@@TRINITY_DN377_c0_g1_i1.p1,celegans@@@TRINITY_DN377_c0_g1_i4.p1,celegans@@@TRINITY_DN377_c0_g1_i3.p1	celegans@@@TRINITY_GG_4464_c0_g1_i1.p1	cinopinata@@@TRINITY_DN721_c0_g1_i1.p1,cinopinata@@@TRINITY_DN721_c0_g1_i2.p1,cinopinata@@@TRINITY_DN721_c0_g1_i3.p1	cjaponica@@@TRINITY_DN3156_c0_g1_i2.p1,cjaponica@@@TRINITY_DN3156_c0_g1_i3.p1,cjaponica@@@TRINITY_DN3156_c0_g1_i4.p1,cjaponica@@@TRINITY_DN3156_c0_g1_i6.p1	cremanei@@@TRINITY_DN505_c0_g1_i2.p1,cremanei@@@TRINITY_DN505_c0_g1_i5.p1,cremanei@@@TRINITY_DN505_c0_g1_i4.p1	ppacificus@@@TRINITY_DN570_c0_g1_i1.p1,ppacificus@@@TRINITY_DN570_c0_g1_i2.p1
95	14	35	0.392	CEW1@@@TRINITY_DN2455_c0_g1_i1.p1,CEW1@@@TRINITY_DN2455_c0_g1_i3.p1	DF5006@@@TRINITY_DN2508_c0_g1_i1.p1,DF5006@@@TRINITY_DN2508_c0_g1_i2.p1	DF5012@@@TRINITY_DN2287_c0_g1_i3.p1,DF5012@@@TRINITY_DN2287_c0_g1_i4.p1	DF5112@@@TRINITY_DN931_c0_g1_i2.p1,DF5112@@@TRINITY_DN931_c0_g1_i1.p1	MT8872@@@TRINITY_DN257_c0_g1_i3.p1,MT8872@@@TRINITY_DN257_c0_g1_i7.p1	T09A5.2b,T09A5.2c,T09A5.2a,T09A5.2d	cbrenneri@@@TRINITY_DN4609_c0_g1_i2.p1,cbrenneri@@@TRINITY_DN4609_c0_g1_i4.p1,cbrenneri@@@TRINITY_DN4609_c0_g1_i3.p1,cbrenneri@@@TRINITY_DN4609_c0_g1_i1.p1	cbriggsae@@@TRINITY_DN9177_c0_g1_i1.p1,cbriggsae@@@TRINITY_DN9177_c0_g1_i2.p1,cbriggsae@@@TRINITY_DN9177_c0_g1_i3.p1	celegans@@@TRINITY_DN2149_c0_g1_i2.p1,celegans@@@TRINITY_DN2149_c0_g1_i1.p1	celegans@@@TRINITY_GG_288_c0_g1_i1.p1,celegans@@@TRINITY_GG_288_c0_g1_i3.p1	cinopinata@@@TRINITY_DN5778_c0_g1_i2.p1,cinopinata@@@TRINITY_DN5778_c0_g1_i4.p1,cinopinata@@@TRINITY_DN5778_c0_g1_i5.p1	cjaponica@@@TRINITY_DN3773_c0_g1_i3.p1	cremanei@@@TRINITY_DN18104_c0_g1_i7.p1,cremanei@@@TRINITY_DN18104_c0_g1_i6.p1,cremanei@@@TRINITY_DN18104_c0_g1_i1.p1,cremanei@@@TRINITY_DN18104_c0_g1_i3.p1	ppacificus@@@TRINITY_DN914_c0_g1_i2.p1,ppacificus@@@TRINITY_DN914_c0_g1_i1.p1
96	14	35	0.348	CEW1@@@TRINITY_DN4503_c0_g1_i1.p1	DF5006@@@TRINITY_DN2185_c0_g1_i1.p1,DF5006@@@TRINITY_DN2185_c0_g1_i2.p1	DF5012@@@TRINITY_DN22154_c0_g1_i1.p1,DF5012@@@TRINITY_DN10657_c0_g1_i2.p1	DF5112@@@TRINITY_DN94_c0_g1_i1.p1,DF5112@@@TRINITY_DN94_c0_g1_i2.p1,DF5112@@@TRINITY_DN94_c0_g1_i4.p1	MT8872@@@TRINITY_DN499_c0_g1_i1.p1,MT8872@@@TRINITY_DN499_c0_g1_i2.p1	W08A12.1c,W08A12.1b,W08A12.1e,W08A12.1a,W08A12.1d	cbrenneri@@@TRINITY_DN1240_c0_g1_i1.p1,cbrenneri@@@TRINITY_DN1240_c0_g1_i2.p1,cbrenneri@@@TRINITY_DN1240_c0_g1_i4.p1,cbrenneri@@@TRINITY_DN1240_c0_g1_i3.p1	cbriggsae@@@TRINITY_DN601_c0_g2_i6.p1,cbriggsae@@@TRINITY_DN601_c0_g2_i3.p1,cbriggsae@@@TRINITY_DN601_c0_g2_i4.p1	celegans@@@TRINITY_DN172_c0_g1_i3.p1,celegans@@@TRINITY_DN172_c0_g1_i2.p1,celegans@@@TRINITY_DN172_c0_g1_i4.p1,celegans@@@TRINITY_DN172_c0_g1_i1.p1	celegans@@@TRINITY_GG_7434_c0_g1_i1.p1	cinopinata@@@TRINITY_DN942_c0_g1_i1.p1,cinopinata@@@TRINITY_DN942_c0_g1_i3.p1,cinopinata@@@TRINITY_DN942_c0_g1_i2.p1	cjaponica@@@TRINITY_DN1357_c0_g1_i10.p1	cremanei@@@TRINITY_DN2327_c0_g1_i3.p1,cremanei@@@TRINITY_DN2327_c0_g1_i2.p1	ppacificus@@@TRINITY_DN1266_c0_g1_i1.p1,ppacificus@@@TRINITY_DN1266_c0_g1_i3.p1
97	14	35	0.224	CEW1@@@TRINITY_DN1917_c0_g1_i1.p1	DF5006@@@TRINITY_DN1855_c0_g1_i1.p1	DF5012@@@TRINITY_DN509_c0_g1_i1.p1,DF5012@@@TRINITY_DN509_c0_g1_i2.p1	DF5112@@@TRINITY_DN1149_c2_g2_i2.p1,DF5112@@@TRINITY_DN1149_c2_g2_i1.p1	MT8872@@@TRINITY_DN255_c0_g1_i2.p1	W06F12.1a,W06F12.1e,W06F12.1d,W06F12.1b,W06F12.1c	cbrenneri@@@TRINITY_DN1191_c0_g1_i1.p1,cbrenneri@@@TRINITY_DN1191_c0_g1_i2.p1,cbrenneri@@@TRINITY_DN1191_c0_g1_i3.p1	cbriggsae@@@TRINITY_DN500_c0_g1_i1.p1,cbriggsae@@@TRINITY_DN500_c0_g1_i3.p1,cbriggsae@@@TRINITY_DN500_c0_g1_i2.p1	celegans@@@TRINITY_DN420_c0_g1_i1.p1,celegans@@@TRINITY_DN420_c0_g1_i6.p1,celegans@@@TRINITY_DN420_c0_g1_i8.p1,celegans@@@TRINITY_DN420_c0_g1_i7.p1,celegans@@@TRINITY_DN420_c0_g1_i9.p1	celegans@@@TRINITY_GG_9420_c0_g1_i1.p1,celegans@@@TRINITY_GG_9420_c0_g1_i2.p1,celegans@@@TRINITY_GG_9420_c0_g1_i3.p1	cinopinata@@@TRINITY_DN1372_c0_g1_i1.p1,cinopinata@@@TRINITY_DN1372_c0_g1_i2.p1,cinopinata@@@TRINITY_DN1372_c0_g1_i3.p1	cjaponica@@@TRINITY_DN979_c0_g1_i1.p1,cjaponica@@@TRINITY_DN979_c0_g1_i2.p1	cremanei@@@TRINITY_DN3002_c0_g1_i2.p1,cremanei@@@TRINITY_DN3002_c0_g1_i3.p1,cremanei@@@TRINITY_DN3002_c0_g1_i5.p1	ppacificus@@@TRINITY_DN4948_c0_g1_i1.p1
98	14	35	0.167	CEW1@@@TRINITY_DN3303_c0_g1_i1.p1,CEW1@@@TRINITY_DN3303_c0_g1_i2.p1	DF5006@@@TRINITY_DN2109_c0_g1_i1.p1	DF5012@@@TRINITY_DN2468_c0_g1_i1.p1,DF5012@@@TRINITY_DN2468_c0_g1_i3.p1	DF5112@@@TRINITY_DN1124_c0_g1_i1.p1,DF5112@@@TRINITY_DN1124_c0_g1_i2.p1	MT8872@@@TRINITY_DN1847_c0_g1_i1.p1	C53B4.7a,C53B4.7d,C53B4.7e,C53B4.7c,C53B4.7b,F56H6.5	cbrenneri@@@TRINITY_DN8367_c0_g1_i1.p1,cbrenneri@@@TRINITY_DN8367_c0_g1_i2.p1,cbrenneri@@@TRINITY_DN8367_c0_g1_i3.p1	cbriggsae@@@TRINITY_DN1330_c0_g1_i1.p1,cbriggsae@@@TRINITY_DN1330_c0_g1_i2.p1	celegans@@@TRINITY_DN753_c0_g1_i2.p1,celegans@@@TRINITY_DN753_c0_g1_i5.p1,celegans@@@TRINITY_DN753_c0_g1_i4.p1,celegans@@@TRINITY_DN753_c0_g1_i1.p1	celegans@@@TRINITY_GG_3782_c2_g1_i2.p1,celegans@@@TRINITY_GG_3782_c2_g1_i3.p1	cinopinata@@@TRINITY_DN2274_c0_g1_i2.p1,cinopinata@@@TRINITY_DN2274_c0_g1_i3.p1,cinopinata@@@TRINITY_DN2274_c0_g1_i1.p1	cjaponica@@@TRINITY_DN703_c0_g1_i1.p1,cjaponica@@@TRINITY_DN703_c0_g1_i2.p1	cremanei@@@TRINITY_DN6100_c0_g1_i2.p1,cremanei@@@TRINITY_DN6100_c0_g1_i9.p1,cremanei@@@TRINITY_DN6100_c0_g1_i3.p1,cremanei@@@TRINITY_DN6100_c0_g1_i4.p1	ppacificus@@@TRINITY_DN1981_c0_g1_i2.p1
99	14	35	0.126	CEW1@@@TRINITY_DN2275_c0_g2_i1.p1,CEW1@@@TRINITY_DN2275_c0_g2_i2.p1	DF5006@@@TRINITY_DN2402_c0_g1_i1.p1,DF5006@@@TRINITY_DN2402_c0_g1_i3.p1,DF5006@@@TRINITY_DN2402_c0_g1_i4.p1,DF5006@@@TRINITY_DN2402_c0_g1_i5.p1	DF5012@@@TRINITY_DN1639_c0_g1_i5.p1	DF5112@@@TRINITY_DN1330_c0_g1_i1.p1,DF5112@@@TRINITY_DN1330_c0_g1_i3.p1	MT8872@@@TRINITY_DN2435_c0_g1_i1.p1,MT8872@@@TRINITY_DN2435_c0_g1_i2.p1	F30B5.7,C06G8.3b,C06G8.3c	cbrenneri@@@TRINITY_DN1027_c0_g1_i1.p1,cbrenneri@@@TRINITY_DN1027_c0_g1_i5.p1,cbrenneri@@@TRINITY_DN9638_c0_g1_i1.p1	cbriggsae@@@TRINITY_DN21_c0_g1_i3.p1	celegans@@@TRINITY_DN7398_c0_g1_i1.p1,celegans@@@TRINITY_DN2104_c0_g1_i1.p1,celegans@@@TRINITY_DN2104_c0_g1_i2.p1	celegans@@@TRINITY_GG_15578_c0_g1_i1.p1,celegans@@@TRINITY_GG_2069_c0_g1_i2.p1,celegans@@@TRINITY_GG_2069_c0_g1_i1.p1	cinopinata@@@TRINITY_DN3788_c0_g1_i4.p1,cinopinata@@@TRINITY_DN3788_c0_g1_i9.p1,cinopinata@@@TRINITY_DN16515_c0_g1_i1.p1	cjaponica@@@TRINITY_DN1310_c0_g1_i3.p1,cjaponica@@@TRINITY_DN1310_c0_g1_i1.p1	cremanei@@@TRINITY_DN21456_c0_g1_i1.p1,cremanei@@@TRINITY_DN24176_c0_g1_i1.p1	ppacificus@@@TRINITY_DN1213_c0_g1_i4.p1,ppacificus@@@TRINITY_DN1213_c0_g1_i7.p1,ppacificus@@@TRINITY_DN1213_c0_g1_i5.p1,ppacificus@@@TRINITY_DN1213_c0_g1_i2.p1
100	14	34	0.582	CEW1@@@TRINITY_DN630_c0_g1_i1.p1,CEW1@@@TRINITY_DN630_c0_g1_i2.p1,CEW1@@@TRINITY_DN630_c0_g1_i5.p1,CEW1@@@TRINITY_DN630_c0_g1_i6.p1	DF5006@@@TRINITY_DN1511_c0_g1_i1.p1,DF5006@@@TRINITY_DN1511_c0_g1_i2.p1,DF5006@@@TRINITY_DN1511_c0_g1_i3.p1,DF5006@@@TRINITY_DN1511_c0_g1_i4.p1	DF5012@@@TRINITY_DN1385_c0_g1_i1.p1,DF5012@@@TRINITY_DN1385_c0_g1_i2.p1,DF5012@@@TRINITY_DN1385_c0_g1_i3.p1,DF5012@@@TRINITY_DN1385_c0_g1_i4.p1,DF5012@@@TRINITY_DN1385_c0_g1_i5.p1,DF5012@@@TRINITY_DN1385_c0_g1_i6.p1,DF5012@@@TRINITY_DN1385_c0_g1_i7.p1,DF5012@@@TRINITY_DN1385_c0_g1_i8.p1	DF5112@@@TRINITY_DN642_c0_g1_i1.p1,DF5112@@@TRINITY_DN642_c0_g1_i5.p1	MT8872@@@TRINITY_DN1476_c0_g1_i1.p1	W07E11.1a,W07E11.1b	cbrenneri@@@TRINITY_DN1445_c0_g1_i4.p1	cbriggsae@@@TRINITY_DN2586_c0_g1_i1.p1,cbriggsae@@@TRINITY_DN2586_c0_g1_i2.p1	celegans@@@TRINITY_DN3606_c0_g1_i1.p1,celegans@@@TRINITY_DN3606_c0_g1_i2.p1	celegans@@@TRINITY_GG_5189_c0_g1_i1.p1	cinopinata@@@TRINITY_DN839_c0_g2_i3.p1	cjaponica@@@TRINITY_DN1481_c0_g1_i1.p1,cjaponica@@@TRINITY_DN1481_c0_g1_i2.p1	cremanei@@@TRINITY_DN20805_c0_g1_i1.p1,cremanei@@@TRINITY_DN20805_c0_g1_i4.p1	ppacificus@@@TRINITY_DN9955_c0_g1_i1.p1,ppacificus@@@TRINITY_DN9955_c0_g1_i2.p1
101	14	34	0.581	CEW1@@@TRINITY_DN299_c0_g1_i1.p1,CEW1@@@TRINITY_DN299_c0_g1_i2.p1	DF5006@@@TRINITY_DN3763_c0_g1_i1.p1,DF5006@@@TRINITY_DN3763_c0_g1_i2.p1,DF5006@@@TRINITY_DN3763_c0_g1_i3.p1	DF5012@@@TRINITY_DN3091_c0_g1_i1.p1,DF5012@@@TRINITY_DN3091_c0_g1_i2.p1,DF5012@@@TRINITY_DN3091_c0_g1_i3.p1,DF5012@@@TRINITY_DN3091_c0_g1_i4.p1	DF5112@@@TRINITY_DN310_c0_g1_i1.p1,DF5112@@@TRINITY_DN310_c0_g1_i2.p1	MT8872@@@TRINITY_DN15727_c0_g1_i1.p1	C54G4.1a,C54G4.1c,C54G4.1d	cbrenneri@@@TRINITY_DN4722_c0_g2_i10.p1,cbrenneri@@@TRINITY_DN4722_c0_g2_i2.p1,cbrenneri@@@TRINITY_DN4722_c0_g2_i5.p1,cbrenneri@@@TRINITY_DN4722_c0_g2_i9.p1	cbriggsae@@@TRINITY_DN706_c0_g1_i2.p1,cbriggsae@@@TRINITY_DN706_c0_g1_i3.p1	celegans@@@TRINITY_DN874_c0_g2_i1.p1,celegans@@@TRINITY_DN874_c0_g2_i2.p1	celegans@@@TRINITY_GG_11434_c0_g1_i1.p1,celegans@@@TRINITY_GG_11434_c0_g1_i2.p1	cinopinata@@@TRINITY_DN156_c0_g1_i2.p1,cinopinata@@@TRINITY_DN156_c0_g1_i3.p1	cjaponica@@@TRINITY_DN433_c0_g1_i3.p1	cremanei@@@TRINITY_DN11343_c0_g1_i1.p1,cremanei@@@TRINITY_DN11343_c0_g1_i10.p1,cremanei@@@TRINITY_DN11343_c0_g1_i6.p1,cremanei@@@TRINITY_DN11343_c0_g1_i8.p1,cremanei@@@TRINITY_DN11343_c0_g1_i9.p1	ppacificus@@@TRINITY_DN3887_c0_g1_i2.p1
102	14	34	0.434	CEW1@@@TRINITY_DN31_c0_g1_i10.p1,CEW1@@@TRINITY_DN31_c0_g1_i3.p1,CEW1@@@TRINITY_DN31_c0_g1_i4.p1	DF5006@@@TRINITY_DN789_c1_g1_i1.p1,DF5006@@@TRINITY_DN789_c1_g1_i2.p1	DF5012@@@TRINITY_DN4209_c0_g1_i1.p1,DF5012@@@TRINITY_DN4209_c0_g1_i2.p1,DF5012@@@TRINITY_DN4209_c0_g1_i3.p1	DF5112@@@TRINITY_DN1661_c0_g1_i3.p1,DF5112@@@TRINITY_DN1661_c0_g1_i4.p1,DF5112@@@TRINITY_DN1661_c0_g1_i1.p1,DF5112@@@TRINITY_DN1661_c0_g1_i2.p1	MT8872@@@TRINITY_DN305_c0_g1_i1.p1,MT8872@@@TRINITY_DN305_c0_g1_i2.p1,MT8872@@@TRINITY_DN305_c0_g1_i3.p1	T01H8.1a,T01H8.1e,T01H8.1c,T01H8.1b	cbrenneri@@@TRINITY_DN2568_c0_g1_i2.p1,cbrenneri@@@TRINITY_DN2568_c0_g1_i1.p1	cbriggsae@@@TRINITY_DN2380_c0_g1_i3.p1,cbriggsae@@@TRINITY_DN2380_c0_g1_i2.p1,cbriggsae@@@TRINITY_DN2380_c0_g1_i1.p1	celegans@@@TRINITY_DN1037_c0_g2_i1.p1	celegans@@@TRINITY_GG_22383_c0_g1_i1.p1	cinopinata@@@TRINITY_DN2495_c0_g1_i2.p1,cinopinata@@@TRINITY_DN2495_c0_g1_i1.p1	cjaponica@@@TRINITY_DN1610_c0_g1_i2.p1,cjaponica@@@TRINITY_DN1610_c0_g1_i1.p1	cremanei@@@TRINITY_DN2903_c0_g1_i3.p1,cremanei@@@TRINITY_DN2903_c0_g1_i2.p1	ppacificus@@@TRINITY_DN132_c0_g1_i1.p1,ppacificus@@@TRINITY_DN132_c0_g1_i2.p1
103	14	34	0.291	CEW1@@@TRINITY_DN16686_c0_g1_i1.p2,CEW1@@@TRINITY_DN1897_c0_g1_i1.p1,CEW1@@@TRINITY_DN1897_c0_g1_i4.p1	DF5006@@@TRINITY_DN1372_c0_g1_i1.p1,DF5006@@@TRINITY_DN1372_c0_g1_i2.p1,DF5006@@@TRINITY_DN1372_c0_g1_i3.p1	DF5012@@@TRINITY_DN1016_c0_g4_i1.p1	DF5112@@@TRINITY_DN4186_c0_g1_i1.p1,DF5112@@@TRINITY_DN4697_c0_g1_i1.p1	MT8872@@@TRINITY_DN660_c0_g1_i1.p1,MT8872@@@TRINITY_DN660_c0_g1_i2.p1	K01H12.2,T01B11.4,T27E9.1	cbrenneri@@@TRINITY_DN1416_c0_g1_i1.p1,cbrenneri@@@TRINITY_DN1416_c0_g1_i2.p1,cbrenneri@@@TRINITY_DN1416_c0_g1_i3.p1,cbrenneri@@@TRINITY_DN1416_c0_g2_i1.p1	cbriggsae@@@TRINITY_DN46_c0_g1_i1.p1,cbriggsae@@@TRINITY_DN46_c0_g2_i1.p1	celegans@@@TRINITY_DN1015_c0_g1_i1.p1,celegans@@@TRINITY_DN1015_c0_g1_i2.p1,celegans@@@TRINITY_DN1015_c0_g1_i3.p1	celegans@@@TRINITY_GG_14617_c0_g1_i1.p1,celegans@@@TRINITY_GG_14824_c0_g1_i1.p1,celegans@@@TRINITY_GG_20990_c0_g1_i1.p1,celegans@@@TRINITY_GG_8191_c1_g1_i1.p1	cinopinata@@@TRINITY_DN296_c0_g1_i1.p1,cinopinata@@@TRINITY_DN19588_c0_g1_i1.p1	cjaponica@@@TRINITY_DN723_c0_g1_i2.p1,cjaponica@@@TRINITY_DN723_c0_g1_i1.p1	cremanei@@@TRINITY_DN1196_c0_g2_i1.p1,cremanei@@@TRINITY_DN1196_c0_g1_i1.p2	ppacificus@@@TRINITY_DN370_c0_g2_i1.p2
104	14	34	0.267	CEW1@@@TRINITY_DN1524_c0_g1_i1.p1,CEW1@@@TRINITY_DN1524_c0_g1_i4.p1,CEW1@@@TRINITY_DN1524_c0_g1_i5.p1,CEW1@@@TRINITY_DN1524_c0_g1_i6.p1	DF5006@@@TRINITY_DN1277_c0_g1_i3.p1,DF5006@@@TRINITY_DN1277_c0_g1_i4.p1	DF5012@@@TRINITY_DN3380_c0_g2_i1.p1,DF5012@@@TRINITY_DN3380_c0_g2_i4.p1,DF5012@@@TRINITY_DN3380_c0_g2_i3.p1	DF5112@@@TRINITY_DN1026_c0_g1_i2.p1,DF5112@@@TRINITY_DN1026_c0_g1_i3.p1	MT8872@@@TRINITY_DN2365_c0_g1_i4.p1,MT8872@@@TRINITY_DN2365_c0_g1_i2.p1	C48D5.2b,C48D5.2c	cbrenneri@@@TRINITY_DN656_c0_g1_i2.p1,cbrenneri@@@TRINITY_DN656_c0_g1_i1.p1	cbriggsae@@@TRINITY_DN1172_c0_g1_i3.p1	celegans@@@TRINITY_DN2198_c0_g1_i3.p1	celegans@@@TRINITY_GG_9603_c0_g1_i1.p1	cinopinata@@@TRINITY_DN1270_c0_g1_i1.p1,cinopinata@@@TRINITY_DN1270_c0_g1_i6.p1,cinopinata@@@TRINITY_DN1270_c0_g1_i7.p1,cinopinata@@@TRINITY_DN1270_c0_g1_i8.p1,cinopinata@@@TRINITY_DN1270_c0_g1_i2.p1,cinopinata@@@TRINITY_DN1270_c0_g1_i9.p1	cjaponica@@@TRINITY_DN3667_c0_g1_i6.p1,cjaponica@@@TRINITY_DN3667_c0_g1_i3.p1,cjaponica@@@TRINITY_DN3667_c0_g1_i4.p1,cjaponica@@@TRINITY_DN3667_c0_g1_i5.p1	cremanei@@@TRINITY_DN3615_c0_g1_i6.p1,cremanei@@@TRINITY_DN3615_c0_g1_i7.p1,cremanei@@@TRINITY_DN3615_c0_g1_i1.p1	ppacificus@@@TRINITY_DN7480_c0_g1_i3.p1
105	14	34	0.257	CEW1@@@TRINITY_DN5799_c0_g1_i2.p1,CEW1@@@TRINITY_DN5799_c0_g1_i4.p1,CEW1@@@TRINITY_DN5799_c0_g1_i5.p1	DF5006@@@TRINITY_DN3602_c0_g1_i1.p1,DF5006@@@TRINITY_DN3602_c0_g1_i2.p1,DF5006@@@TRINITY_DN3602_c0_g1_i3.p1,DF5006@@@TRINITY_DN3602_c0_g1_i4.p1	DF5012@@@TRINITY_DN730_c0_g1_i1.p1,DF5012@@@TRINITY_DN730_c0_g1_i13.p1,DF5012@@@TRINITY_DN730_c0_g1_i7.p1,DF5012@@@TRINITY_DN730_c0_g1_i9.p1	DF5112@@@TRINITY_DN1457_c0_g1_i2.p1,DF5112@@@TRINITY_DN1457_c0_g1_i1.p1	MT8872@@@TRINITY_DN4499_c0_g1_i1.p1	F55C12.5b,F55C12.5a	cbrenneri@@@TRINITY_DN19889_c0_g1_i1.p1,cbrenneri@@@TRINITY_DN19889_c0_g1_i2.p1,cbrenneri@@@TRINITY_DN19889_c0_g1_i3.p1	cbriggsae@@@TRINITY_DN8904_c0_g1_i2.p1,cbriggsae@@@TRINITY_DN8904_c0_g1_i1.p1,cbriggsae@@@TRINITY_DN8904_c0_g1_i3.p1	celegans@@@TRINITY_DN2959_c0_g3_i1.p1	celegans@@@TRINITY_GG_13419_c0_g1_i1.p1	cinopinata@@@TRINITY_DN999_c0_g1_i1.p1,cinopinata@@@TRINITY_DN999_c0_g1_i3.p1,cinopinata@@@TRINITY_DN999_c0_g1_i4.p1	cjaponica@@@TRINITY_DN3671_c0_g1_i3.p1,cjaponica@@@TRINITY_DN3671_c0_g1_i4.p1,cjaponica@@@TRINITY_DN3671_c0_g1_i1.p1,cjaponica@@@TRINITY_DN3671_c0_g1_i2.p1	cremanei@@@TRINITY_DN1792_c0_g2_i1.p1,cremanei@@@TRINITY_DN1792_c0_g2_i2.p1	ppacificus@@@TRINITY_DN1056_c0_g1_i1.p1
106	14	34	0.119	CEW1@@@TRINITY_DN490_c0_g1_i1.p1,CEW1@@@TRINITY_DN490_c0_g1_i8.p1,CEW1@@@TRINITY_DN490_c0_g1_i11.p1,CEW1@@@TRINITY_DN490_c0_g1_i4.p1,CEW1@@@TRINITY_DN490_c0_g1_i5.p1	DF5006@@@TRINITY_DN1795_c0_g1_i2.p1,DF5006@@@TRINITY_DN1795_c0_g1_i3.p1,DF5006@@@TRINITY_DN1795_c0_g1_i1.p1	DF5012@@@TRINITY_DN326_c0_g1_i2.p1,DF5012@@@TRINITY_DN326_c0_g1_i6.p1,DF5012@@@TRINITY_DN326_c0_g1_i1.p1,DF5012@@@TRINITY_DN326_c0_g1_i5.p1	DF5112@@@TRINITY_DN981_c0_g1_i2.p1,DF5112@@@TRINITY_DN981_c0_g1_i1.p1	MT8872@@@TRINITY_DN2969_c0_g1_i2.p1	C14F11.5b,C14F11.5a	cbrenneri@@@TRINITY_DN6942_c0_g1_i4.p1,cbrenneri@@@TRINITY_DN6942_c0_g1_i6.p1,cbrenneri@@@TRINITY_DN6942_c0_g1_i3.p1	cbriggsae@@@TRINITY_DN2549_c0_g1_i2.p2	celegans@@@TRINITY_DN3150_c0_g1_i4.p1,celegans@@@TRINITY_DN3150_c0_g1_i3.p1	celegans@@@TRINITY_GG_16720_c1_g1_i1.p1	cinopinata@@@TRINITY_DN2311_c0_g1_i3.p1,cinopinata@@@TRINITY_DN2311_c0_g1_i4.p1	cjaponica@@@TRINITY_DN3562_c0_g1_i1.p1	cremanei@@@TRINITY_DN6422_c0_g1_i2.p1,cremanei@@@TRINITY_DN6422_c0_g1_i3.p1	ppacificus@@@TRINITY_DN175_c0_g1_i1.p1,ppacificus@@@TRINITY_DN175_c0_g1_i3.p1,ppacificus@@@TRINITY_DN175_c0_g1_i7.p1,ppacificus@@@TRINITY_DN175_c0_g1_i5.p1,ppacificus@@@TRINITY_DN175_c0_g1_i6.p1
107	14	33	0.699	CEW1@@@TRINITY_DN57_c0_g1_i11.p1,CEW1@@@TRINITY_DN57_c0_g1_i5.p1	DF5006@@@TRINITY_DN76_c0_g1_i2.p1	DF5012@@@TRINITY_DN1640_c0_g1_i1.p1,DF5012@@@TRINITY_DN1640_c0_g1_i2.p1,DF5012@@@TRINITY_DN1640_c0_g1_i5.p1,DF5012@@@TRINITY_DN1640_c0_g1_i6.p1,DF5012@@@TRINITY_DN1640_c0_g1_i7.p1,DF5012@@@TRINITY_DN1640_c0_g1_i8.p1,DF5012@@@TRINITY_DN1640_c0_g1_i9.p1	DF5112@@@TRINITY_DN7_c0_g1_i1.p1,DF5112@@@TRINITY_DN7_c0_g1_i4.p1,DF5112@@@TRINITY_DN7_c0_g1_i5.p1	MT8872@@@TRINITY_DN3196_c0_g1_i1.p1,MT8872@@@TRINITY_DN3196_c0_g1_i3.p1	F57C12.5b,F57C12.5c,F57C12.5d,F57C12.5e	cbrenneri@@@TRINITY_DN5629_c0_g1_i1.p1	cbriggsae@@@TRINITY_DN628_c0_g1_i6.p1	celegans@@@TRINITY_DN1516_c0_g1_i2.p1,celegans@@@TRINITY_DN1516_c0_g1_i5.p1	celegans@@@TRINITY_GG_16528_c0_g1_i3.p1	cinopinata@@@TRINITY_DN158_c0_g2_i4.p1,cinopinata@@@TRINITY_DN158_c0_g2_i5.p1	cjaponica@@@TRINITY_DN13131_c0_g1_i1.p1	cremanei@@@TRINITY_DN1418_c0_g1_i4.p1,cremanei@@@TRINITY_DN1418_c0_g1_i5.p1,cremanei@@@TRINITY_DN1418_c0_g1_i6.p1	ppacificus@@@TRINITY_DN286_c1_g1_i1.p1,ppacificus@@@TRINITY_DN286_c1_g1_i2.p1,ppacificus@@@TRINITY_DN286_c1_g1_i3.p1
108	14	33	0.698	CEW1@@@TRINITY_DN366_c0_g1_i1.p1,CEW1@@@TRINITY_DN366_c0_g1_i2.p1,CEW1@@@TRINITY_DN366_c0_g1_i3.p1,CEW1@@@TRINITY_DN366_c0_g1_i4.p1	DF5006@@@TRINITY_DN5321_c0_g3_i3.p1,DF5006@@@TRINITY_DN5321_c0_g3_i4.p1,DF5006@@@TRINITY_DN5321_c0_g3_i5.p1	DF5012@@@TRINITY_DN196_c0_g1_i1.p1,DF5012@@@TRINITY_DN196_c0_g1_i2.p1,DF5012@@@TRINITY_DN196_c0_g1_i3.p1	DF5112@@@TRINITY_DN231_c0_g1_i1.p1,DF5112@@@TRINITY_DN231_c0_g1_i3.p1,DF5112@@@TRINITY_DN231_c0_g1_i4.p1	MT8872@@@TRINITY_DN1027_c0_g1_i1.p1,MT8872@@@TRINITY_DN1027_c0_g1_i2.p1,MT8872@@@TRINITY_DN1027_c0_g1_i3.p1	F07F6.4	cbrenneri@@@TRINITY_DN1046_c0_g1_i1.p1,cbrenneri@@@TRINITY_DN1046_c0_g1_i2.p1,cbrenneri@@@TRINITY_DN1046_c0_g1_i3.p1	cbriggsae@@@TRINITY_DN585_c0_g1_i1.p1,cbriggsae@@@TRINITY_DN585_c0_g1_i2.p1	celegans@@@TRINITY_DN456_c0_g1_i2.p1,celegans@@@TRINITY_DN456_c0_g1_i3.p1	celegans@@@TRINITY_GG_12298_c0_g1_i1.p1,celegans@@@TRINITY_GG_12298_c0_g1_i2.p1	cinopinata@@@TRINITY_DN277_c0_g1_i1.p1,cinopinata@@@TRINITY_DN277_c0_g1_i2.p1	cjaponica@@@TRINITY_DN6798_c0_g1_i1.p1	cremanei@@@TRINITY_DN1704_c0_g1_i1.p1	ppacificus@@@TRINITY_DN4492_c0_g1_i1.p1,ppacificus@@@TRINITY_DN4492_c0_g1_i3.p1,ppacificus@@@TRINITY_DN4492_c0_g1_i4.p1
109	14	33	0.65	CEW1@@@TRINITY_DN684_c0_g1_i1.p1,CEW1@@@TRINITY_DN684_c0_g1_i2.p1	DF5006@@@TRINITY_DN1741_c0_g2_i1.p1,DF5006@@@TRINITY_DN1741_c0_g2_i2.p1	DF5012@@@TRINITY_DN1651_c0_g1_i1.p1,DF5012@@@TRINITY_DN1651_c0_g1_i2.p1,DF5012@@@TRINITY_DN1651_c0_g1_i3.p1	DF5112@@@TRINITY_DN117_c0_g1_i1.p1,DF5112@@@TRINITY_DN117_c0_g1_i2.p1	MT8872@@@TRINITY_DN1356_c0_g1_i2.p2	C06A5.7a,C06A5.7b	cbrenneri@@@TRINITY_DN4305_c0_g1_i1.p1,cbrenneri@@@TRINITY_DN4305_c0_g1_i2.p1	cbriggsae@@@TRINITY_DN807_c0_g1_i1.p1,cbriggsae@@@TRINITY_DN807_c0_g1_i2.p1,cbriggsae@@@TRINITY_DN807_c0_g1_i3.p1	celegans@@@TRINITY_DN1257_c0_g1_i1.p1,celegans@@@TRINITY_DN1257_c0_g1_i2.p1,celegans@@@TRINITY_DN1257_c0_g1_i3.p1	celegans@@@TRINITY_GG_21813_c0_g1_i1.p1,celegans@@@TRINITY_GG_21813_c0_g1_i2.p1	cinopinata@@@TRINITY_DN449_c0_g1_i1.p1,cinopinata@@@TRINITY_DN449_c0_g1_i2.p1,cinopinata@@@TRINITY_DN449_c0_g1_i3.p1	cjaponica@@@TRINITY_DN17946_c0_g1_i6.p1,cjaponica@@@TRINITY_DN17946_c0_g1_i7.p1,cjaponica@@@TRINITY_DN17946_c0_g1_i8.p1	cremanei@@@TRINITY_DN2030_c0_g1_i2.p1,cremanei@@@TRINITY_DN2030_c0_g1_i3.p1,cremanei@@@TRINITY_DN2030_c0_g1_i1.p1	ppacificus@@@TRINITY_DN661_c0_g1_i1.p1,ppacificus@@@TRINITY_DN661_c0_g1_i2.p1
110	14	33	0.557	CEW1@@@TRINITY_DN1123_c0_g1_i1.p1,CEW1@@@TRINITY_DN1123_c0_g1_i2.p1	DF5006@@@TRINITY_DN697_c0_g1_i1.p1,DF5006@@@TRINITY_DN697_c0_g1_i2.p1,DF5006@@@TRINITY_DN697_c0_g1_i3.p1,DF5006@@@TRINITY_DN697_c0_g1_i4.p1	DF5012@@@TRINITY_DN3155_c0_g1_i1.p1,DF5012@@@TRINITY_DN3155_c0_g1_i2.p1	DF5112@@@TRINITY_DN1751_c0_g1_i2.p1,DF5112@@@TRINITY_DN1751_c0_g1_i3.p1	MT8872@@@TRINITY_DN1385_c0_g1_i1.p1,MT8872@@@TRINITY_DN1385_c0_g1_i2.p1,MT8872@@@TRINITY_DN1385_c0_g1_i3.p1	F36H2.1a,F36H2.1b,F36H2.1c	cbrenneri@@@TRINITY_DN1177_c0_g1_i1.p1,cbrenneri@@@TRINITY_DN1177_c0_g1_i2.p1	cbriggsae@@@TRINITY_DN3760_c0_g1_i1.p1,cbriggsae@@@TRINITY_DN3760_c0_g1_i2.p1	celegans@@@TRINITY_DN3242_c0_g1_i2.p1,celegans@@@TRINITY_DN3242_c0_g1_i1.p1	celegans@@@TRINITY_GG_22611_c0_g1_i1.p1	cinopinata@@@TRINITY_DN2065_c0_g1_i2.p1,cinopinata@@@TRINITY_DN2065_c0_g1_i1.p1,cinopinata@@@TRINITY_DN2065_c0_g1_i3.p1	cjaponica@@@TRINITY_DN1980_c0_g2_i1.p1,cjaponica@@@TRINITY_DN1980_c0_g2_i2.p1	cremanei@@@TRINITY_DN3896_c0_g1_i1.p1,cremanei@@@TRINITY_DN3896_c0_g1_i2.p1,cremanei@@@TRINITY_DN3896_c0_g1_i4.p1	ppacificus@@@TRINITY_DN3149_c0_g1_i1.p1,ppacificus@@@TRINITY_DN3149_c0_g1_i2.p1
111	14	33	0.49	CEW1@@@TRINITY_DN2445_c0_g1_i1.p1	DF5006@@@TRINITY_DN1392_c0_g1_i1.p1	DF5012@@@TRINITY_DN723_c0_g1_i1.p1,DF5012@@@TRINITY_DN723_c0_g1_i2.p1	DF5112@@@TRINITY_DN1092_c0_g1_i1.p1,DF5112@@@TRINITY_DN1092_c0_g1_i2.p1,DF5112@@@TRINITY_DN1092_c0_g1_i3.p1	MT8872@@@TRINITY_DN1044_c0_g1_i1.p1,MT8872@@@TRINITY_DN1044_c0_g1_i2.p1	C48B4.4a,C48B4.4b,C48B4.4c,C48B4.4d	cbrenneri@@@TRINITY_DN2159_c0_g1_i1.p1,cbrenneri@@@TRINITY_DN2159_c0_g1_i3.p1	cbriggsae@@@TRINITY_DN2512_c0_g1_i1.p1,cbriggsae@@@TRINITY_DN2512_c0_g1_i2.p1	celegans@@@TRINITY_DN1725_c0_g1_i1.p1,celegans@@@TRINITY_DN1725_c0_g1_i2.p1	celegans@@@TRINITY_GG_19409_c0_g1_i1.p1,celegans@@@TRINITY_GG_19409_c0_g1_i2.p1	cinopinata@@@TRINITY_DN1817_c0_g1_i1.p1,cinopinata@@@TRINITY_DN1817_c0_g1_i2.p1,cinopinata@@@TRINITY_DN1817_c0_g1_i3.p1	cjaponica@@@TRINITY_DN1025_c0_g1_i1.p1,cjaponica@@@TRINITY_DN1025_c0_g1_i4.p1,cjaponica@@@TRINITY_DN1025_c0_g1_i5.p1,cjaponica@@@TRINITY_DN1025_c0_g1_i8.p1	cremanei@@@TRINITY_DN3970_c0_g1_i2.p1,cremanei@@@TRINITY_DN3970_c0_g1_i3.p1,cremanei@@@TRINITY_DN3970_c0_g1_i4.p1,cremanei@@@TRINITY_DN3970_c0_g1_i5.p1	ppacificus@@@TRINITY_DN5682_c0_g1_i1.p1
112	14	33	0.444	CEW1@@@TRINITY_DN1635_c0_g1_i1.p1,CEW1@@@TRINITY_DN1635_c0_g1_i3.p1	DF5006@@@TRINITY_DN5768_c0_g1_i1.p1	DF5012@@@TRINITY_DN1627_c0_g1_i1.p1,DF5012@@@TRINITY_DN1627_c0_g1_i2.p1	DF5112@@@TRINITY_DN804_c0_g1_i1.p1,DF5112@@@TRINITY_DN804_c0_g1_i3.p1	MT8872@@@TRINITY_DN18968_c0_g1_i1.p1	Y47G6A.7a,Y47G6A.7b	cbrenneri@@@TRINITY_DN11305_c0_g1_i2.p1,cbrenneri@@@TRINITY_DN11305_c0_g1_i3.p1	cbriggsae@@@TRINITY_DN6029_c0_g1_i4.p1,cbriggsae@@@TRINITY_DN6029_c0_g1_i1.p1,cbriggsae@@@TRINITY_DN6029_c0_g1_i2.p1,cbriggsae@@@TRINITY_DN6029_c0_g1_i5.p1	celegans@@@TRINITY_DN1155_c0_g1_i2.p1,celegans@@@TRINITY_DN1155_c0_g1_i5.p1,celegans@@@TRINITY_DN1155_c0_g1_i4.p1,celegans@@@TRINITY_DN1155_c0_g1_i6.p1,celegans@@@TRINITY_DN1155_c0_g1_i1.p1,celegans@@@TRINITY_DN1155_c0_g1_i3.p1	celegans@@@TRINITY_GG_10210_c0_g1_i1.p1,celegans@@@TRINITY_GG_10210_c0_g1_i3.p1,celegans@@@TRINITY_GG_10210_c0_g1_i2.p1	cinopinata@@@TRINITY_DN1705_c0_g1_i3.p1,cinopinata@@@TRINITY_DN1705_c0_g1_i2.p1,cinopinata@@@TRINITY_DN1705_c0_g1_i1.p1,cinopinata@@@TRINITY_DN1705_c0_g1_i4.p1	cjaponica@@@TRINITY_DN408_c3_g1_i1.p1	cremanei@@@TRINITY_DN3022_c0_g1_i1.p1,cremanei@@@TRINITY_DN3022_c0_g1_i3.p1	ppacificus@@@TRINITY_DN4910_c0_g2_i1.p1
113	14	33	0.381	CEW1@@@TRINITY_DN1861_c0_g1_i1.p1,CEW1@@@TRINITY_DN1861_c0_g1_i2.p1,CEW1@@@TRINITY_DN1861_c0_g1_i4.p1	DF5006@@@TRINITY_DN7730_c0_g1_i2.p1,DF5006@@@TRINITY_DN7730_c0_g1_i3.p1,DF5006@@@TRINITY_DN7730_c0_g1_i4.p1	DF5012@@@TRINITY_DN11129_c0_g1_i1.p1,DF5012@@@TRINITY_DN11129_c0_g1_i2.p1	DF5112@@@TRINITY_DN1193_c0_g1_i1.p1,DF5112@@@TRINITY_DN1193_c0_g1_i2.p1	MT8872@@@TRINITY_DN1232_c0_g1_i1.p1,MT8872@@@TRINITY_DN1232_c0_g1_i2.p1,MT8872@@@TRINITY_DN1232_c0_g1_i3.p1,MT8872@@@TRINITY_DN1232_c0_g1_i5.p1,MT8872@@@TRINITY_DN1232_c0_g1_i6.p1	F42A10.2a,F42A10.2c,F42A10.2b	cbrenneri@@@TRINITY_DN5168_c0_g1_i5.p1	cbriggsae@@@TRINITY_DN11599_c3_g2_i1.p1	celegans@@@TRINITY_DN4485_c0_g1_i2.p1,celegans@@@TRINITY_DN4485_c0_g1_i1.p1	celegans@@@TRINITY_GG_9278_c0_g1_i1.p1,celegans@@@TRINITY_GG_9278_c0_g1_i2.p1	cinopinata@@@TRINITY_DN4122_c0_g1_i1.p1,cinopinata@@@TRINITY_DN4122_c0_g1_i3.p1,cinopinata@@@TRINITY_DN4122_c0_g1_i4.p1	cjaponica@@@TRINITY_DN5235_c0_g1_i1.p1	cremanei@@@TRINITY_DN11807_c0_g1_i4.p1,cremanei@@@TRINITY_DN11807_c0_g1_i6.p1,cremanei@@@TRINITY_DN11807_c0_g1_i7.p1	ppacificus@@@TRINITY_DN2791_c0_g1_i1.p1,ppacificus@@@TRINITY_DN2791_c0_g1_i3.p1
114	14	33	0.374	CEW1@@@TRINITY_DN107_c0_g1_i1.p1,CEW1@@@TRINITY_DN107_c0_g1_i2.p1,CEW1@@@TRINITY_DN107_c0_g1_i3.p1,CEW1@@@TRINITY_DN107_c0_g1_i4.p1,CEW1@@@TRINITY_DN107_c0_g1_i5.p1,CEW1@@@TRINITY_DN107_c0_g1_i6.p1,CEW1@@@TRINITY_DN107_c0_g1_i7.p1	DF5006@@@TRINITY_DN274_c0_g1_i1.p2,DF5006@@@TRINITY_DN274_c0_g1_i5.p1	DF5012@@@TRINITY_DN126_c0_g1_i1.p1,DF5012@@@TRINITY_DN126_c0_g1_i2.p1	DF5112@@@TRINITY_DN181_c0_g1_i2.p1,DF5112@@@TRINITY_DN181_c0_g1_i1.p1	MT8872@@@TRINITY_DN3019_c0_g1_i1.p1	F31E3.5,R03G5.1	cbrenneri@@@TRINITY_DN497_c0_g1_i1.p1,cbrenneri@@@TRINITY_DN497_c0_g1_i3.p1	cbriggsae@@@TRINITY_DN536_c0_g1_i1.p1	celegans@@@TRINITY_DN1229_c0_g1_i1.p1,celegans@@@TRINITY_DN1229_c0_g1_i2.p1	celegans@@@TRINITY_GG_19565_c0_g1_i1.p1,celegans@@@TRINITY_GG_4821_c0_g1_i1.p1,celegans@@@TRINITY_GG_8014_c0_g1_i1.p2	cinopinata@@@TRINITY_DN14478_c0_g1_i2.p1	cjaponica@@@TRINITY_DN314_c0_g2_i1.p1,cjaponica@@@TRINITY_DN314_c0_g2_i2.p1	cremanei@@@TRINITY_DN2138_c0_g1_i1.p1,cremanei@@@TRINITY_DN2138_c0_g1_i2.p1,cremanei@@@TRINITY_DN2138_c0_g1_i3.p1,cremanei@@@TRINITY_DN2138_c0_g1_i4.p1	ppacificus@@@TRINITY_DN1134_c0_g1_i1.p1,ppacificus@@@TRINITY_DN1134_c0_g1_i2.p1
115	14	33	0.251	CEW1@@@TRINITY_DN272_c0_g1_i2.p1,CEW1@@@TRINITY_DN272_c0_g1_i1.p1	DF5006@@@TRINITY_DN598_c2_g3_i1.p1	DF5012@@@TRINITY_DN305_c0_g1_i1.p1,DF5012@@@TRINITY_DN305_c0_g1_i4.p1,DF5012@@@TRINITY_DN305_c0_g1_i3.p1,DF5012@@@TRINITY_DN305_c0_g1_i2.p1,DF5012@@@TRINITY_DN305_c0_g1_i5.p1	DF5112@@@TRINITY_DN658_c0_g1_i2.p1,DF5112@@@TRINITY_DN658_c0_g1_i1.p1	MT8872@@@TRINITY_DN752_c0_g1_i1.p1	F44A6.1a,F44A6.1b	cbrenneri@@@TRINITY_DN2913_c0_g1_i3.p1,cbrenneri@@@TRINITY_DN2913_c0_g1_i1.p1	cbriggsae@@@TRINITY_DN2123_c0_g1_i1.p1,cbriggsae@@@TRINITY_DN2123_c0_g1_i2.p1	celegans@@@TRINITY_DN3233_c0_g1_i2.p1,celegans@@@TRINITY_DN3233_c0_g1_i1.p1	celegans@@@TRINITY_GG_5203_c0_g1_i2.p1,celegans@@@TRINITY_GG_5203_c0_g1_i1.p1	cinopinata@@@TRINITY_DN520_c0_g1_i2.p1,cinopinata@@@TRINITY_DN520_c0_g1_i1.p1	cjaponica@@@TRINITY_DN1107_c0_g2_i2.p1	cremanei@@@TRINITY_DN4506_c0_g2_i1.p1,cremanei@@@TRINITY_DN4506_c0_g2_i2.p1	ppacificus@@@TRINITY_DN1131_c0_g1_i4.p1,ppacificus@@@TRINITY_DN1131_c0_g1_i1.p1,ppacificus@@@TRINITY_DN1131_c0_g1_i2.p1,ppacificus@@@TRINITY_DN1131_c0_g1_i7.p1,ppacificus@@@TRINITY_DN1131_c0_g1_i8.p1,ppacificus@@@TRINITY_DN1131_c0_g1_i3.p1,ppacificus@@@TRINITY_DN1131_c0_g1_i6.p1
116	14	33	0.216	CEW1@@@TRINITY_DN727_c0_g1_i2.p1,CEW1@@@TRINITY_DN727_c0_g1_i1.p1	DF5006@@@TRINITY_DN3358_c0_g1_i2.p1,DF5006@@@TRINITY_DN3358_c0_g1_i3.p1	DF5012@@@TRINITY_DN67_c0_g1_i1.p1,DF5012@@@TRINITY_DN67_c0_g1_i2.p1	DF5112@@@TRINITY_DN721_c0_g1_i2.p1,DF5112@@@TRINITY_DN721_c0_g1_i1.p1	MT8872@@@TRINITY_DN945_c0_g1_i1.p1,MT8872@@@TRINITY_DN945_c0_g1_i2.p1	Y56A3A.12a,Y56A3A.12b,Y56A3A.5	cbrenneri@@@TRINITY_DN288_c0_g1_i2.p1,cbrenneri@@@TRINITY_DN288_c0_g1_i1.p1	cbriggsae@@@TRINITY_DN1865_c0_g1_i5.p1,cbriggsae@@@TRINITY_DN1865_c0_g1_i6.p1	celegans@@@TRINITY_DN8178_c0_g2_i3.p1,celegans@@@TRINITY_DN8178_c0_g2_i2.p1	celegans@@@TRINITY_GG_21047_c0_g1_i2.p1,celegans@@@TRINITY_GG_21047_c0_g1_i1.p1	cinopinata@@@TRINITY_DN1957_c0_g1_i2.p1,cinopinata@@@TRINITY_DN1957_c0_g1_i1.p1	cjaponica@@@TRINITY_DN622_c0_g1_i1.p1,cjaponica@@@TRINITY_DN622_c0_g1_i2.p1	cremanei@@@TRINITY_DN804_c0_g1_i1.p1,cremanei@@@TRINITY_DN804_c0_g1_i6.p1,cremanei@@@TRINITY_DN804_c0_g1_i5.p1,cremanei@@@TRINITY_DN804_c0_g1_i8.p1,cremanei@@@TRINITY_DN804_c0_g1_i4.p1	ppacificus@@@TRINITY_DN168_c0_g2_i2.p1,ppacificus@@@TRINITY_DN168_c0_g2_i3.p1,ppacificus@@@TRINITY_DN168_c0_g2_i4.p1
117	14	33	0.19	CEW1@@@TRINITY_DN232_c0_g2_i1.p1,CEW1@@@TRINITY_DN232_c0_g2_i2.p1	DF5006@@@TRINITY_DN114_c0_g1_i5.p1,DF5006@@@TRINITY_DN114_c0_g1_i6.p1,DF5006@@@TRINITY_DN114_c0_g1_i2.p1,DF5006@@@TRINITY_DN114_c0_g1_i3.p1	DF5012@@@TRINITY_DN454_c0_g1_i2.p1	DF5112@@@TRINITY_DN5747_c0_g1_i5.p1,DF5112@@@TRINITY_DN5747_c0_g1_i6.p1,DF5112@@@TRINITY_DN5747_c0_g1_i11.p1	MT8872@@@TRINITY_DN1900_c0_g1_i1.p1,MT8872@@@TRINITY_DN1900_c0_g1_i2.p1,MT8872@@@TRINITY_DN1900_c0_g1_i3.p1,MT8872@@@TRINITY_DN1900_c0_g1_i4.p1	R05C11.3	cbrenneri@@@TRINITY_DN4665_c0_g2_i1.p1	cbriggsae@@@TRINITY_DN3142_c0_g1_i1.p1,cbriggsae@@@TRINITY_DN3142_c0_g1_i2.p1	celegans@@@TRINITY_DN5223_c0_g1_i2.p1,celegans@@@TRINITY_DN5223_c0_g1_i3.p1,celegans@@@TRINITY_DN5223_c0_g1_i1.p1	celegans@@@TRINITY_GG_2420_c0_g1_i3.p1,celegans@@@TRINITY_GG_2420_c0_g1_i2.p1	cinopinata@@@TRINITY_DN23336_c0_g1_i1.p1	cjaponica@@@TRINITY_DN4680_c0_g2_i1.p1	cremanei@@@TRINITY_DN4285_c0_g1_i8.p1,cremanei@@@TRINITY_DN4285_c0_g1_i2.p1,cremanei@@@TRINITY_DN4285_c0_g1_i3.p1,cremanei@@@TRINITY_DN4285_c0_g1_i4.p1,cremanei@@@TRINITY_DN4285_c0_g1_i5.p1,cremanei@@@TRINITY_DN4285_c0_g1_i7.p1,cremanei@@@TRINITY_DN4285_c0_g1_i9.p1	ppacificus@@@TRINITY_DN537_c0_g1_i1.p1
118	14	33	0.149	CEW1@@@TRINITY_DN1631_c0_g2_i5.p1,CEW1@@@TRINITY_DN1631_c0_g2_i1.p1,CEW1@@@TRINITY_DN1631_c0_g2_i2.p1,CEW1@@@TRINITY_DN1631_c0_g2_i3.p1,CEW1@@@TRINITY_DN1631_c0_g2_i4.p1	DF5006@@@TRINITY_DN460_c1_g1_i1.p1,DF5006@@@TRINITY_DN460_c1_g1_i2.p1	DF5012@@@TRINITY_DN2038_c0_g1_i1.p1	DF5112@@@TRINITY_DN3712_c0_g1_i7.p1,DF5112@@@TRINITY_DN3712_c0_g1_i5.p1	MT8872@@@TRINITY_DN10003_c0_g1_i2.p1	R07D5.1a,R07D5.1j,R07D5.1d,R07D5.1e,R07D5.1h,R07D5.1f,R07D5.1g,R07D5.1i	cbrenneri@@@TRINITY_DN7184_c0_g3_i1.p1,cbrenneri@@@TRINITY_DN7184_c0_g3_i2.p1	cbriggsae@@@TRINITY_DN6694_c0_g4_i3.p1	celegans@@@TRINITY_DN2239_c0_g1_i4.p1,celegans@@@TRINITY_DN2239_c0_g1_i1.p1,celegans@@@TRINITY_DN2239_c0_g1_i2.p1	celegans@@@TRINITY_GG_15945_c0_g1_i1.p1	cinopinata@@@TRINITY_DN4682_c0_g1_i2.p1	cjaponica@@@TRINITY_DN1188_c0_g5_i4.p1	cremanei@@@TRINITY_DN5917_c0_g1_i2.p1,cremanei@@@TRINITY_DN5917_c0_g1_i6.p1,cremanei@@@TRINITY_DN5917_c0_g1_i8.p1	ppacificus@@@TRINITY_DN10126_c0_g1_i4.p1,ppacificus@@@TRINITY_DN10126_c0_g1_i8.p1
119	14	33	0.135	CEW1@@@TRINITY_DN6973_c0_g1_i1.p1	DF5006@@@TRINITY_DN17045_c0_g1_i1.p1	DF5012@@@TRINITY_DN438_c0_g1_i1.p1,DF5012@@@TRINITY_DN438_c0_g1_i2.p1	DF5112@@@TRINITY_DN4287_c0_g1_i1.p1	MT8872@@@TRINITY_DN1718_c0_g1_i1.p1,MT8872@@@TRINITY_DN1718_c0_g1_i2.p1	H19N07.2a,H19N07.2g,H19N07.2i,H19N07.2j,H19N07.2k,H19N07.2m,H19N07.2o,H19N07.2b,H19N07.2c,H19N07.2d,H19N07.2e,H19N07.2f,H19N07.2h,H19N07.2l,H19N07.2n,H19N07.2p	cbrenneri@@@TRINITY_DN3793_c0_g1_i1.p1	cbriggsae@@@TRINITY_DN923_c0_g2_i3.p1	celegans@@@TRINITY_DN662_c0_g1_i1.p1,celegans@@@TRINITY_DN662_c0_g1_i2.p1	celegans@@@TRINITY_GG_6414_c0_g1_i1.p1,celegans@@@TRINITY_GG_6414_c0_g1_i2.p1	cinopinata@@@TRINITY_DN1414_c0_g1_i1.p1	cjaponica@@@TRINITY_DN8823_c0_g1_i1.p1	cremanei@@@TRINITY_DN1565_c0_g1_i3.p1	ppacificus@@@TRINITY_DN3675_c0_g2_i1.p1
120	14	33	0.125	CEW1@@@TRINITY_DN2369_c0_g1_i2.p1	DF5006@@@TRINITY_DN2518_c0_g1_i1.p1	DF5012@@@TRINITY_DN167_c0_g1_i10.p1,DF5012@@@TRINITY_DN167_c0_g1_i12.p1,DF5012@@@TRINITY_DN167_c0_g1_i2.p1,DF5012@@@TRINITY_DN167_c0_g1_i5.p1,DF5012@@@TRINITY_DN167_c0_g1_i3.p1,DF5012@@@TRINITY_DN167_c0_g1_i4.p1,DF5012@@@TRINITY_DN167_c0_g1_i9.p1	DF5112@@@TRINITY_DN2045_c1_g1_i1.p1	MT8872@@@TRINITY_DN11136_c0_g1_i1.p1,MT8872@@@TRINITY_DN11136_c0_g1_i11.p1,MT8872@@@TRINITY_DN11136_c0_g1_i2.p1,MT8872@@@TRINITY_DN11136_c0_g1_i9.p1	T01C8.1a,T01C8.1b,T01C8.1c	cbrenneri@@@TRINITY_DN6967_c0_g1_i1.p1,cbrenneri@@@TRINITY_DN6967_c0_g1_i2.p1	cbriggsae@@@TRINITY_DN3110_c0_g1_i3.p1,cbriggsae@@@TRINITY_DN3110_c0_g1_i2.p1,cbriggsae@@@TRINITY_DN3110_c0_g1_i1.p1	celegans@@@TRINITY_DN3347_c0_g1_i1.p1	celegans@@@TRINITY_GG_4803_c0_g1_i1.p1	cinopinata@@@TRINITY_DN1616_c0_g1_i1.p1,cinopinata@@@TRINITY_DN1616_c0_g1_i2.p1,cinopinata@@@TRINITY_DN1616_c0_g1_i3.p1	cjaponica@@@TRINITY_DN447_c1_g2_i1.p1	cremanei@@@TRINITY_DN5937_c0_g1_i3.p1,cremanei@@@TRINITY_DN5937_c0_g1_i4.p1,cremanei@@@TRINITY_DN5937_c0_g1_i5.p1,cremanei@@@TRINITY_DN5937_c0_g1_i1.p1	ppacificus@@@TRINITY_DN304_c0_g3_i3.p1
121	14	33	0.117	CEW1@@@TRINITY_DN188_c0_g1_i4.p1,CEW1@@@TRINITY_DN188_c0_g1_i6.p1,CEW1@@@TRINITY_DN188_c0_g1_i8.p1,CEW1@@@TRINITY_DN188_c0_g1_i1.p1,CEW1@@@TRINITY_DN188_c0_g1_i10.p1,CEW1@@@TRINITY_DN188_c0_g1_i3.p1,CEW1@@@TRINITY_DN188_c0_g1_i5.p1,CEW1@@@TRINITY_DN188_c0_g1_i7.p1,CEW1@@@TRINITY_DN188_c0_g1_i11.p1,CEW1@@@TRINITY_DN188_c0_g1_i2.p1	DF5006@@@TRINITY_DN7279_c0_g2_i4.p1,DF5006@@@TRINITY_DN7279_c0_g2_i6.p1	DF5012@@@TRINITY_DN574_c0_g1_i12.p1,DF5012@@@TRINITY_DN574_c0_g1_i2.p1,DF5012@@@TRINITY_DN574_c0_g1_i5.p1,DF5012@@@TRINITY_DN574_c0_g1_i7.p1,DF5012@@@TRINITY_DN574_c0_g1_i8.p1,DF5012@@@TRINITY_DN574_c0_g1_i9.p1	DF5112@@@TRINITY_DN568_c2_g1_i1.p1	MT8872@@@TRINITY_DN7950_c0_g1_i2.p1,MT8872@@@TRINITY_DN7950_c0_g1_i5.p1,MT8872@@@TRINITY_DN7950_c0_g1_i4.p1	Y39H10A.6a	cbrenneri@@@TRINITY_DN8377_c0_g1_i1.p1	cbriggsae@@@TRINITY_DN857_c0_g2_i1.p1	celegans@@@TRINITY_DN8516_c0_g1_i1.p1	celegans@@@TRINITY_GG_19021_c0_g1_i1.p1	cinopinata@@@TRINITY_DN1675_c0_g1_i1.p1	cjaponica@@@TRINITY_DN3911_c0_g1_i2.p1	cremanei@@@TRINITY_DN6732_c0_g1_i1.p1	ppacificus@@@TRINITY_DN12139_c0_g2_i1.p1,ppacificus@@@TRINITY_DN12139_c0_g2_i2.p1,ppacificus@@@TRINITY_DN1746_c0_g1_i1.p1
122	14	33	0.115	CEW1@@@TRINITY_DN482_c0_g1_i1.p1,CEW1@@@TRINITY_DN2867_c0_g1_i1.p1	DF5006@@@TRINITY_DN173_c0_g1_i1.p1,DF5006@@@TRINITY_DN173_c0_g1_i2.p1	DF5012@@@TRINITY_DN0_c0_g3_i1.p1,DF5012@@@TRINITY_DN0_c0_g1_i1.p1,DF5012@@@TRINITY_DN0_c0_g2_i1.p1	DF5112@@@TRINITY_DN1389_c0_g1_i1.p1,DF5112@@@TRINITY_DN3182_c0_g1_i2.p1	MT8872@@@TRINITY_DN1229_c0_g1_i1.p1	F53A9.10,T22E5.5	cbrenneri@@@TRINITY_DN544_c0_g1_i6.p1,cbrenneri@@@TRINITY_DN544_c0_g1_i2.p1,cbrenneri@@@TRINITY_DN544_c0_g1_i3.p1,cbrenneri@@@TRINITY_DN544_c0_g1_i1.p1,cbrenneri@@@TRINITY_DN544_c0_g1_i4.p1	cbriggsae@@@TRINITY_DN19714_c0_g1_i1.p1,cbriggsae@@@TRINITY_DN932_c0_g1_i1.p1	celegans@@@TRINITY_DN80_c1_g4_i1.p1	celegans@@@TRINITY_GG_15898_c0_g1_i1.p1,celegans@@@TRINITY_GG_4902_c0_g1_i1.p1,celegans@@@TRINITY_GG_16239_c1_g1_i1.p1	cinopinata@@@TRINITY_DN3076_c0_g1_i1.p1,cinopinata@@@TRINITY_DN20269_c0_g1_i1.p1	cjaponica@@@TRINITY_DN1919_c3_g1_i1.p1,cjaponica@@@TRINITY_DN67_c0_g1_i1.p1	cremanei@@@TRINITY_DN2057_c0_g1_i4.p1,cremanei@@@TRINITY_DN2057_c0_g1_i5.p1,cremanei@@@TRINITY_DN2057_c0_g1_i2.p1	ppacificus@@@TRINITY_DN179_c0_g1_i1.p1,ppacificus@@@TRINITY_DN179_c0_g3_i1.p1,ppacificus@@@TRINITY_DN179_c0_g1_i2.p1
123	14	33	0.113	CEW1@@@TRINITY_DN1083_c0_g1_i1.p1,CEW1@@@TRINITY_DN1083_c0_g1_i2.p1	DF5006@@@TRINITY_DN6560_c0_g1_i1.p1	DF5012@@@TRINITY_DN563_c0_g1_i2.p1,DF5012@@@TRINITY_DN563_c0_g1_i3.p1	DF5112@@@TRINITY_DN8592_c0_g1_i2.p1	MT8872@@@TRINITY_DN2048_c0_g1_i2.p2,MT8872@@@TRINITY_DN2048_c0_g1_i1.p2	E02D9.1	cbrenneri@@@TRINITY_DN3045_c0_g1_i1.p1,cbrenneri@@@TRINITY_DN3045_c0_g1_i2.p1	cbriggsae@@@TRINITY_DN1949_c0_g2_i1.p1,cbriggsae@@@TRINITY_DN1949_c0_g2_i2.p1,cbriggsae@@@TRINITY_DN1949_c0_g2_i3.p1	celegans@@@TRINITY_DN1083_c0_g1_i1.p1,celegans@@@TRINITY_DN1083_c0_g1_i2.p1,celegans@@@TRINITY_DN1083_c0_g1_i3.p1,celegans@@@TRINITY_DN1083_c0_g1_i4.p1,celegans@@@TRINITY_DN1083_c0_g1_i5.p1,celegans@@@TRINITY_DN1083_c0_g1_i6.p1,celegans@@@TRINITY_DN1083_c0_g1_i7.p1	celegans@@@TRINITY_GG_10662_c0_g1_i1.p1	cinopinata@@@TRINITY_DN4297_c0_g1_i2.p1,cinopinata@@@TRINITY_DN4297_c0_g1_i1.p1	cjaponica@@@TRINITY_DN6644_c0_g1_i13.p1,cjaponica@@@TRINITY_DN6644_c0_g1_i15.p1,cjaponica@@@TRINITY_DN6644_c0_g1_i1.p1,cjaponica@@@TRINITY_DN6644_c0_g1_i14.p1,cjaponica@@@TRINITY_DN6644_c0_g1_i4.p1,cjaponica@@@TRINITY_DN6644_c0_g1_i9.p1	cremanei@@@TRINITY_DN6980_c0_g1_i2.p1	ppacificus@@@TRINITY_DN4096_c0_g1_i1.p1,ppacificus@@@TRINITY_DN4096_c0_g1_i2.p1
124	14	32	0.682	CEW1@@@TRINITY_DN4628_c0_g1_i6.p1	DF5006@@@TRINITY_DN5323_c0_g1_i1.p1,DF5006@@@TRINITY_DN5323_c0_g1_i3.p1,DF5006@@@TRINITY_DN5323_c0_g1_i4.p1	DF5012@@@TRINITY_DN15807_c0_g1_i1.p1	DF5112@@@TRINITY_DN1862_c1_g1_i1.p1,DF5112@@@TRINITY_DN1862_c1_g1_i2.p1,DF5112@@@TRINITY_DN1862_c1_g1_i3.p1,DF5112@@@TRINITY_DN1862_c1_g1_i4.p1	MT8872@@@TRINITY_DN7680_c0_g1_i1.p1,MT8872@@@TRINITY_DN7680_c0_g1_i2.p1	ZC581.9c,ZC581.9a,ZC581.9d,ZC581.9b	cbrenneri@@@TRINITY_DN7125_c0_g1_i2.p1,cbrenneri@@@TRINITY_DN7125_c0_g1_i4.p1,cbrenneri@@@TRINITY_DN7125_c0_g1_i6.p1	cbriggsae@@@TRINITY_DN6117_c0_g1_i1.p1,cbriggsae@@@TRINITY_DN6117_c0_g1_i2.p1	celegans@@@TRINITY_DN9768_c0_g1_i2.p1,celegans@@@TRINITY_DN9768_c0_g1_i3.p1,celegans@@@TRINITY_DN9768_c0_g1_i1.p1	celegans@@@TRINITY_GG_22794_c0_g1_i1.p1,celegans@@@TRINITY_GG_22794_c0_g1_i2.p1	cinopinata@@@TRINITY_DN6787_c1_g1_i1.p1	cjaponica@@@TRINITY_DN7702_c0_g1_i3.p1	cremanei@@@TRINITY_DN13300_c0_g1_i2.p1,cremanei@@@TRINITY_DN13300_c0_g1_i3.p1,cremanei@@@TRINITY_DN13300_c0_g1_i5.p1	ppacificus@@@TRINITY_DN4893_c0_g1_i1.p1,ppacificus@@@TRINITY_DN4893_c0_g1_i3.p1
125	14	32	0.64	CEW1@@@TRINITY_DN1253_c0_g1_i1.p1,CEW1@@@TRINITY_DN1253_c0_g1_i2.p1	DF5006@@@TRINITY_DN123_c0_g1_i1.p1,DF5006@@@TRINITY_DN123_c0_g1_i3.p1	DF5012@@@TRINITY_DN827_c0_g1_i1.p1,DF5012@@@TRINITY_DN827_c0_g1_i2.p1	DF5112@@@TRINITY_DN758_c0_g1_i2.p1,DF5112@@@TRINITY_DN758_c0_g1_i3.p1	MT8872@@@TRINITY_DN2412_c0_g1_i2.p1,MT8872@@@TRINITY_DN2412_c0_g1_i3.p1	K02F3.2a,K02F3.2b	cbrenneri@@@TRINITY_DN944_c0_g1_i3.p1,cbrenneri@@@TRINITY_DN944_c0_g1_i4.p1	cbriggsae@@@TRINITY_DN14307_c0_g1_i1.p1,cbriggsae@@@TRINITY_DN14307_c0_g1_i2.p1	celegans@@@TRINITY_DN884_c0_g1_i1.p1,celegans@@@TRINITY_DN884_c0_g1_i2.p1,celegans@@@TRINITY_DN884_c0_g1_i3.p1,celegans@@@TRINITY_DN884_c0_g1_i4.p1	celegans@@@TRINITY_GG_8479_c0_g1_i1.p1	cinopinata@@@TRINITY_DN127_c0_g1_i3.p1,cinopinata@@@TRINITY_DN127_c0_g1_i4.p1	cjaponica@@@TRINITY_DN5813_c1_g1_i10.p1,cjaponica@@@TRINITY_DN5813_c1_g1_i11.p1,cjaponica@@@TRINITY_DN5813_c1_g1_i4.p1,cjaponica@@@TRINITY_DN5813_c1_g1_i7.p1	cremanei@@@TRINITY_DN13858_c0_g2_i2.p1,cremanei@@@TRINITY_DN13858_c0_g2_i3.p1,cremanei@@@TRINITY_DN13858_c0_g2_i5.p1	ppacificus@@@TRINITY_DN954_c0_g1_i2.p1,ppacificus@@@TRINITY_DN954_c0_g1_i3.p1
126	14	32	0.565	CEW1@@@TRINITY_DN2281_c0_g1_i1.p1,CEW1@@@TRINITY_DN2281_c0_g1_i2.p1	DF5006@@@TRINITY_DN1078_c0_g1_i1.p1,DF5006@@@TRINITY_DN1078_c0_g1_i2.p1	DF5012@@@TRINITY_DN1091_c0_g1_i1.p1,DF5012@@@TRINITY_DN1091_c0_g1_i3.p1,DF5012@@@TRINITY_DN1091_c0_g1_i4.p1	DF5112@@@TRINITY_DN485_c0_g1_i1.p1,DF5112@@@TRINITY_DN485_c0_g1_i3.p1	MT8872@@@TRINITY_DN15848_c0_g1_i1.p1,MT8872@@@TRINITY_DN17258_c0_g1_i1.p1	K11H3.1a,K11H3.1b,K11H3.1d	cbrenneri@@@TRINITY_DN3387_c0_g1_i1.p1,cbrenneri@@@TRINITY_DN3387_c0_g1_i3.p1,cbrenneri@@@TRINITY_DN3387_c0_g1_i2.p1	cbriggsae@@@TRINITY_DN679_c0_g2_i1.p1,cbriggsae@@@TRINITY_DN679_c0_g2_i2.p1	celegans@@@TRINITY_DN1121_c0_g2_i1.p1,celegans@@@TRINITY_DN1121_c0_g2_i3.p1	celegans@@@TRINITY_GG_20624_c1_g1_i1.p1	cinopinata@@@TRINITY_DN1415_c0_g1_i1.p1,cinopinata@@@TRINITY_DN1415_c0_g1_i2.p1	cjaponica@@@TRINITY_DN5406_c0_g2_i3.p1,cjaponica@@@TRINITY_DN5406_c0_g2_i6.p1	cremanei@@@TRINITY_DN21446_c0_g1_i2.p1,cremanei@@@TRINITY_DN21446_c0_g1_i5.p1,cremanei@@@TRINITY_DN21446_c0_g1_i7.p1,cremanei@@@TRINITY_DN21446_c0_g1_i3.p1	ppacificus@@@TRINITY_DN1203_c0_g1_i1.p1,ppacificus@@@TRINITY_DN1203_c0_g1_i3.p1
127	14	32	0.49	CEW1@@@TRINITY_DN756_c0_g1_i1.p1,CEW1@@@TRINITY_DN756_c0_g1_i2.p1,CEW1@@@TRINITY_DN756_c0_g1_i3.p1	DF5006@@@TRINITY_DN464_c0_g1_i1.p1,DF5006@@@TRINITY_DN464_c0_g1_i2.p1,DF5006@@@TRINITY_DN464_c0_g1_i3.p1,DF5006@@@TRINITY_DN464_c0_g1_i4.p1	DF5012@@@TRINITY_DN1194_c0_g1_i1.p1,DF5012@@@TRINITY_DN1194_c0_g1_i2.p1,DF5012@@@TRINITY_DN1194_c0_g1_i3.p1	DF5112@@@TRINITY_DN146_c0_g1_i1.p1,DF5112@@@TRINITY_DN146_c0_g1_i2.p1	MT8872@@@TRINITY_DN1255_c0_g1_i1.p1,MT8872@@@TRINITY_DN1255_c0_g1_i2.p1	F22B7.5b,F22B7.5a	cbrenneri@@@TRINITY_DN1188_c0_g2_i2.p1,cbrenneri@@@TRINITY_DN1188_c0_g2_i1.p1	cbriggsae@@@TRINITY_DN264_c0_g1_i1.p1,cbriggsae@@@TRINITY_DN264_c0_g1_i2.p1	celegans@@@TRINITY_DN572_c0_g1_i2.p1,celegans@@@TRINITY_DN572_c0_g1_i1.p1	celegans@@@TRINITY_GG_8569_c0_g1_i1.p1,celegans@@@TRINITY_GG_8569_c0_g1_i2.p1	cinopinata@@@TRINITY_DN628_c0_g1_i1.p1,cinopinata@@@TRINITY_DN628_c0_g1_i2.p1	cjaponica@@@TRINITY_DN1293_c0_g2_i1.p1,cjaponica@@@TRINITY_DN1293_c0_g2_i2.p1	cremanei@@@TRINITY_DN12084_c0_g3_i1.p1,cremanei@@@TRINITY_DN12084_c0_g3_i2.p1	ppacificus@@@TRINITY_DN5762_c0_g1_i1.p1,ppacificus@@@TRINITY_DN5762_c0_g1_i2.p1
128	14	32	0.338	CEW1@@@TRINITY_DN1886_c0_g1_i2.p1,CEW1@@@TRINITY_DN1886_c0_g1_i1.p1	DF5006@@@TRINITY_DN2036_c0_g1_i2.p1,DF5006@@@TRINITY_DN2036_c0_g1_i3.p1	DF5012@@@TRINITY_DN888_c0_g1_i4.p1,DF5012@@@TRINITY_DN888_c0_g1_i2.p1	DF5112@@@TRINITY_DN1164_c0_g1_i6.p1,DF5112@@@TRINITY_DN1164_c0_g1_i4.p1,DF5112@@@TRINITY_DN1164_c0_g1_i5.p1,DF5112@@@TRINITY_DN1164_c0_g1_i7.p1	MT8872@@@TRINITY_DN1091_c0_g1_i6.p1,MT8872@@@TRINITY_DN1091_c0_g1_i1.p1,MT8872@@@TRINITY_DN1091_c0_g1_i2.p1	Y55F3AM.3a,Y55F3AM.3c	cbrenneri@@@TRINITY_DN10582_c0_g1_i2.p1	cbriggsae@@@TRINITY_DN2197_c0_g2_i1.p1,cbriggsae@@@TRINITY_DN2197_c0_g2_i2.p1	celegans@@@TRINITY_DN4758_c0_g1_i1.p1	celegans@@@TRINITY_GG_2462_c0_g1_i1.p1	cinopinata@@@TRINITY_DN5756_c0_g1_i2.p1,cinopinata@@@TRINITY_DN5756_c0_g1_i1.p1,cinopinata@@@TRINITY_DN5756_c0_g1_i3.p1	cjaponica@@@TRINITY_DN1800_c0_g1_i1.p1,cjaponica@@@TRINITY_DN1800_c0_g1_i3.p1	cremanei@@@TRINITY_DN727_c0_g1_i3.p1,cremanei@@@TRINITY_DN727_c0_g1_i2.p1	ppacificus@@@TRINITY_DN2491_c0_g1_i7.p1,ppacificus@@@TRINITY_DN2491_c0_g1_i3.p1,ppacificus@@@TRINITY_DN2491_c0_g1_i4.p2,ppacificus@@@TRINITY_DN2491_c0_g1_i6.p2,ppacificus@@@TRINITY_DN2491_c0_g1_i8.p2
129	14	32	0.301	CEW1@@@TRINITY_DN577_c0_g1_i1.p1,CEW1@@@TRINITY_DN577_c0_g2_i1.p1	DF5006@@@TRINITY_DN639_c0_g2_i1.p1,DF5006@@@TRINITY_DN639_c0_g3_i2.p1	DF5012@@@TRINITY_DN23501_c0_g1_i1.p1,DF5012@@@TRINITY_DN2772_c0_g1_i1.p1,DF5012@@@TRINITY_DN2772_c0_g1_i2.p1,DF5012@@@TRINITY_DN2772_c0_g1_i3.p1	DF5112@@@TRINITY_DN143_c0_g2_i1.p1,DF5112@@@TRINITY_DN143_c0_g3_i1.p1	MT8872@@@TRINITY_DN788_c0_g1_i1.p1,MT8872@@@TRINITY_DN788_c0_g1_i2.p1	F26E4.8a,F26E4.8b,C47B2.3	cbrenneri@@@TRINITY_DN517_c0_g3_i1.p1,cbrenneri@@@TRINITY_DN517_c0_g3_i2.p1	cbriggsae@@@TRINITY_DN1014_c0_g1_i1.p1,cbriggsae@@@TRINITY_DN1014_c0_g3_i1.p1	celegans@@@TRINITY_DN1391_c0_g1_i1.p1,celegans@@@TRINITY_DN1391_c0_g6_i1.p1	celegans@@@TRINITY_GG_22973_c0_g1_i1.p1	cinopinata@@@TRINITY_DN16_c0_g1_i1.p1	cjaponica@@@TRINITY_DN2322_c0_g2_i1.p1,cjaponica@@@TRINITY_DN2322_c0_g4_i1.p2	cremanei@@@TRINITY_DN1143_c0_g1_i4.p1,cremanei@@@TRINITY_DN1143_c0_g1_i1.p1,cremanei@@@TRINITY_DN1143_c0_g1_i2.p1,cremanei@@@TRINITY_DN1143_c0_g1_i3.p1,cremanei@@@TRINITY_DN1143_c0_g2_i1.p1	ppacificus@@@TRINITY_DN40_c0_g1_i1.p1,ppacificus@@@TRINITY_DN40_c0_g2_i1.p1
130	14	32	0.259	CEW1@@@TRINITY_DN3195_c0_g1_i1.p1	DF5006@@@TRINITY_DN833_c0_g1_i1.p1,DF5006@@@TRINITY_DN833_c0_g1_i2.p1,DF5006@@@TRINITY_DN833_c0_g1_i3.p1,DF5006@@@TRINITY_DN833_c0_g1_i4.p1	DF5012@@@TRINITY_DN5900_c0_g1_i1.p1,DF5012@@@TRINITY_DN5900_c0_g1_i2.p1	DF5112@@@TRINITY_DN5041_c0_g1_i1.p1	MT8872@@@TRINITY_DN15681_c0_g1_i1.p1	Y92H12A.1a,Y92H12A.1b,Y92H12A.1c	cbrenneri@@@TRINITY_DN371_c0_g4_i1.p1,cbrenneri@@@TRINITY_DN371_c0_g4_i2.p1,cbrenneri@@@TRINITY_DN371_c0_g4_i3.p1,cbrenneri@@@TRINITY_DN371_c0_g4_i4.p1	cbriggsae@@@TRINITY_DN1513_c0_g1_i1.p1,cbriggsae@@@TRINITY_DN1513_c0_g1_i3.p1,cbriggsae@@@TRINITY_DN1513_c0_g1_i4.p1,cbriggsae@@@TRINITY_DN1513_c0_g1_i2.p1	celegans@@@TRINITY_DN2708_c0_g1_i1.p1,celegans@@@TRINITY_DN2708_c0_g1_i2.p1	celegans@@@TRINITY_GG_10713_c0_g1_i1.p1,celegans@@@TRINITY_GG_10713_c0_g1_i2.p1	cinopinata@@@TRINITY_DN9421_c1_g1_i1.p1,cinopinata@@@TRINITY_DN9421_c1_g1_i2.p1	cjaponica@@@TRINITY_DN4365_c0_g2_i1.p1	cremanei@@@TRINITY_DN1336_c0_g1_i1.p1,cremanei@@@TRINITY_DN1336_c0_g1_i2.p1,cremanei@@@TRINITY_DN1336_c0_g1_i3.p1,cremanei@@@TRINITY_DN1336_c0_g1_i4.p1	ppacificus@@@TRINITY_DN6839_c0_g1_i1.p1
131	14	32	0.221	CEW1@@@TRINITY_DN3224_c0_g2_i1.p1,CEW1@@@TRINITY_DN3224_c0_g2_i4.p1,CEW1@@@TRINITY_DN3224_c0_g2_i2.p1,CEW1@@@TRINITY_DN3224_c0_g2_i3.p1	DF5006@@@TRINITY_DN3930_c0_g1_i1.p1	DF5012@@@TRINITY_DN1255_c0_g1_i1.p1,DF5012@@@TRINITY_DN1255_c0_g1_i2.p1	DF5112@@@TRINITY_DN5404_c0_g1_i1.p1	MT8872@@@TRINITY_DN1308_c0_g1_i1.p1,MT8872@@@TRINITY_DN1308_c0_g1_i2.p1	C06G3.5a,C06G3.5b	cbrenneri@@@TRINITY_DN687_c0_g1_i1.p1,cbrenneri@@@TRINITY_DN687_c0_g1_i2.p1,cbrenneri@@@TRINITY_DN687_c0_g2_i1.p1	cbriggsae@@@TRINITY_DN1270_c0_g1_i1.p1,cbriggsae@@@TRINITY_DN1270_c0_g2_i1.p1	celegans@@@TRINITY_DN2324_c0_g2_i1.p1	celegans@@@TRINITY_GG_3697_c0_g1_i1.p1	cinopinata@@@TRINITY_DN1493_c0_g1_i12.p1,cinopinata@@@TRINITY_DN1493_c0_g1_i2.p1,cinopinata@@@TRINITY_DN1493_c0_g1_i9.p1	cjaponica@@@TRINITY_DN1297_c0_g1_i2.p1,cjaponica@@@TRINITY_DN1297_c0_g1_i1.p1,cjaponica@@@TRINITY_DN1297_c0_g1_i3.p1	cremanei@@@TRINITY_DN1484_c0_g1_i1.p1,cremanei@@@TRINITY_DN1484_c0_g1_i3.p1,cremanei@@@TRINITY_DN1484_c0_g1_i2.p1,cremanei@@@TRINITY_DN1484_c0_g1_i4.p1	ppacificus@@@TRINITY_DN2495_c0_g1_i1.p1,ppacificus@@@TRINITY_DN2495_c0_g1_i2.p1,ppacificus@@@TRINITY_DN5413_c0_g1_i2.p1
132	14	32	0.173	CEW1@@@TRINITY_DN11_c0_g1_i1.p1	DF5006@@@TRINITY_DN4031_c0_g1_i1.p1,DF5006@@@TRINITY_DN4031_c0_g1_i2.p1	DF5012@@@TRINITY_DN6529_c0_g1_i1.p1,DF5012@@@TRINITY_DN6529_c0_g1_i2.p1,DF5012@@@TRINITY_DN6529_c0_g1_i4.p1	DF5112@@@TRINITY_DN2028_c0_g2_i1.p1,DF5112@@@TRINITY_DN2028_c0_g2_i2.p1	MT8872@@@TRINITY_DN4319_c0_g1_i1.p1	D1069.3b	cbrenneri@@@TRINITY_DN637_c0_g2_i1.p1,cbrenneri@@@TRINITY_DN637_c0_g2_i2.p1,cbrenneri@@@TRINITY_DN637_c0_g2_i3.p1	cbriggsae@@@TRINITY_DN2916_c0_g2_i1.p1,cbriggsae@@@TRINITY_DN2916_c0_g2_i2.p1,cbriggsae@@@TRINITY_DN2916_c0_g2_i3.p1	celegans@@@TRINITY_DN2573_c0_g1_i1.p1,celegans@@@TRINITY_DN2573_c0_g1_i2.p1,celegans@@@TRINITY_DN2573_c0_g1_i3.p1,celegans@@@TRINITY_DN2573_c0_g1_i4.p1	celegans@@@TRINITY_GG_12769_c0_g1_i1.p1,celegans@@@TRINITY_GG_12769_c0_g1_i2.p1,celegans@@@TRINITY_GG_12769_c0_g1_i3.p1,celegans@@@TRINITY_GG_12769_c0_g1_i4.p1	cinopinata@@@TRINITY_DN3183_c0_g1_i1.p1,cinopinata@@@TRINITY_DN3183_c0_g1_i2.p1	cjaponica@@@TRINITY_DN3187_c0_g1_i1.p1,cjaponica@@@TRINITY_DN3187_c0_g1_i3.p1	cremanei@@@TRINITY_DN4049_c0_g1_i2.p1,cremanei@@@TRINITY_DN4049_c0_g1_i3.p1,cremanei@@@TRINITY_DN4049_c0_g1_i4.p1	ppacificus@@@TRINITY_DN3287_c0_g1_i1.p1
133	14	32	0.161	CEW1@@@TRINITY_DN3131_c0_g1_i2.p1,CEW1@@@TRINITY_DN3131_c0_g1_i4.p1,CEW1@@@TRINITY_DN3131_c0_g1_i8.p1,CEW1@@@TRINITY_DN3131_c0_g1_i1.p1	DF5006@@@TRINITY_DN1318_c0_g1_i1.p1,DF5006@@@TRINITY_DN1318_c0_g1_i2.p1	DF5012@@@TRINITY_DN918_c0_g1_i1.p1,DF5012@@@TRINITY_DN918_c0_g1_i2.p1	DF5112@@@TRINITY_DN12_c0_g2_i1.p1	MT8872@@@TRINITY_DN429_c0_g1_i1.p1,MT8872@@@TRINITY_DN429_c0_g1_i2.p1,MT8872@@@TRINITY_DN429_c0_g1_i3.p1,MT8872@@@TRINITY_DN429_c0_g1_i4.p1	F11A3.2a,F11A3.2b	cbrenneri@@@TRINITY_DN2537_c0_g1_i2.p1,cbrenneri@@@TRINITY_DN2537_c0_g1_i1.p1	cbriggsae@@@TRINITY_DN1111_c0_g1_i1.p1,cbriggsae@@@TRINITY_DN1111_c0_g1_i2.p1	celegans@@@TRINITY_DN312_c0_g1_i1.p1	celegans@@@TRINITY_GG_5952_c0_g1_i1.p1	cinopinata@@@TRINITY_DN7018_c0_g1_i1.p1	cjaponica@@@TRINITY_DN2870_c0_g1_i2.p1,cjaponica@@@TRINITY_DN2870_c0_g1_i3.p1,cjaponica@@@TRINITY_DN2870_c0_g1_i6.p1	cremanei@@@TRINITY_DN10651_c0_g2_i2.p1,cremanei@@@TRINITY_DN10651_c0_g2_i3.p1,cremanei@@@TRINITY_DN10651_c0_g2_i4.p1,cremanei@@@TRINITY_DN10651_c0_g2_i7.p1,cremanei@@@TRINITY_DN10651_c0_g2_i1.p1,cremanei@@@TRINITY_DN10651_c0_g2_i5.p1	ppacificus@@@TRINITY_DN7579_c0_g1_i1.p1
134	14	32	0.115	CEW1@@@TRINITY_DN3142_c0_g1_i1.p2	DF5006@@@TRINITY_DN16560_c0_g1_i1.p1	DF5012@@@TRINITY_DN22078_c0_g1_i1.p1	DF5112@@@TRINITY_DN7528_c1_g2_i1.p1,DF5112@@@TRINITY_DN7528_c1_g2_i2.p1	MT8872@@@TRINITY_DN262_c0_g2_i1.p2	K03H1.1,C28D4.3,F26D10.10	cbrenneri@@@TRINITY_DN25461_c0_g1_i1.p1,cbrenneri@@@TRINITY_DN7203_c0_g1_i1.p1	cbriggsae@@@TRINITY_DN1125_c0_g1_i1.p1,cbriggsae@@@TRINITY_DN1125_c0_g1_i2.p1,cbriggsae@@@TRINITY_DN7905_c0_g1_i1.p1	celegans@@@TRINITY_DN3301_c0_g2_i2.p1,celegans@@@TRINITY_DN6010_c0_g2_i1.p1,celegans@@@TRINITY_DN6010_c0_g1_i1.p1	celegans@@@TRINITY_GG_20626_c0_g1_i1.p1,celegans@@@TRINITY_GG_13894_c0_g1_i1.p1,celegans@@@TRINITY_GG_14585_c0_g1_i1.p1,celegans@@@TRINITY_GG_3507_c0_g1_i1.p1	cinopinata@@@TRINITY_DN21369_c0_g1_i1.p1	cjaponica@@@TRINITY_DN1392_c0_g2_i1.p1,cjaponica@@@TRINITY_DN1392_c0_g2_i2.p1,cjaponica@@@TRINITY_DN1392_c0_g1_i1.p1	cremanei@@@TRINITY_DN1814_c0_g3_i1.p1,cremanei@@@TRINITY_DN1814_c0_g3_i2.p1,cremanei@@@TRINITY_DN3563_c0_g1_i2.p1,cremanei@@@TRINITY_DN3563_c0_g1_i4.p1,cremanei@@@TRINITY_DN3563_c0_g1_i1.p1	ppacificus@@@TRINITY_DN1769_c0_g1_i1.p1,ppacificus@@@TRINITY_DN3568_c0_g1_i2.p1
135	14	32	0.112	CEW1@@@TRINITY_DN18231_c0_g1_i1.p1,CEW1@@@TRINITY_DN13164_c0_g1_i1.p1	DF5006@@@TRINITY_DN1347_c0_g1_i1.p1,DF5006@@@TRINITY_DN6524_c0_g1_i2.p1,DF5006@@@TRINITY_DN6524_c0_g1_i3.p1	DF5012@@@TRINITY_DN15698_c0_g1_i1.p1,DF5012@@@TRINITY_DN23532_c0_g1_i1.p1,DF5012@@@TRINITY_DN23368_c0_g1_i1.p1	DF5112@@@TRINITY_DN9804_c0_g1_i1.p1,DF5112@@@TRINITY_DN3136_c0_g1_i2.p1	MT8872@@@TRINITY_DN20961_c0_g1_i1.p1,MT8872@@@TRINITY_DN623_c0_g1_i2.p1	F28H7.3,B0035.13	cbrenneri@@@TRINITY_DN9990_c0_g1_i1.p1,cbrenneri@@@TRINITY_DN4345_c0_g1_i1.p1	cbriggsae@@@TRINITY_DN1247_c0_g1_i1.p1,cbriggsae@@@TRINITY_DN23304_c0_g1_i1.p1	celegans@@@TRINITY_DN18421_c0_g1_i1.p1,celegans@@@TRINITY_DN6079_c0_g2_i1.p1	celegans@@@TRINITY_GG_18650_c0_g1_i1.p1,celegans@@@TRINITY_GG_13863_c0_g1_i1.p1	cinopinata@@@TRINITY_DN3414_c0_g1_i2.p1,cinopinata@@@TRINITY_DN3414_c0_g1_i1.p1,cinopinata@@@TRINITY_DN2852_c0_g1_i1.p1,cinopinata@@@TRINITY_DN2852_c0_g1_i2.p1	cjaponica@@@TRINITY_DN5314_c0_g1_i1.p1	cremanei@@@TRINITY_DN1585_c0_g1_i1.p1,cremanei@@@TRINITY_DN1205_c0_g2_i2.p1	ppacificus@@@TRINITY_DN58_c0_g1_i1.p1,ppacificus@@@TRINITY_DN28908_c0_g1_i1.p1,ppacificus@@@TRINITY_DN58_c0_g3_i1.p1
136	14	32	0.108	CEW1@@@TRINITY_DN10532_c0_g1_i1.p1,CEW1@@@TRINITY_DN4314_c0_g1_i1.p1	DF5006@@@TRINITY_DN91_c0_g4_i1.p1	DF5012@@@TRINITY_DN5296_c0_g1_i1.p1	DF5112@@@TRINITY_DN4576_c0_g2_i1.p1,DF5112@@@TRINITY_DN4453_c0_g1_i1.p1	MT8872@@@TRINITY_DN13479_c0_g1_i1.p1	B0218.1,B0218.2	cbrenneri@@@TRINITY_DN146_c0_g1_i1.p1,cbrenneri@@@TRINITY_DN146_c0_g1_i2.p1,cbrenneri@@@TRINITY_DN146_c0_g1_i3.p1,cbrenneri@@@TRINITY_DN378_c0_g1_i1.p1	cbriggsae@@@TRINITY_DN98_c0_g2_i1.p1	celegans@@@TRINITY_DN4583_c0_g1_i1.p1,celegans@@@TRINITY_DN14863_c0_g1_i1.p1	celegans@@@TRINITY_GG_3681_c0_g1_i1.p1,celegans@@@TRINITY_GG_2292_c1_g1_i1.p1	cinopinata@@@TRINITY_DN4062_c0_g1_i1.p1,cinopinata@@@TRINITY_DN21210_c0_g1_i1.p1	cjaponica@@@TRINITY_DN879_c0_g2_i1.p1,cjaponica@@@TRINITY_DN879_c0_g2_i2.p1,cjaponica@@@TRINITY_DN2211_c0_g1_i1.p1	cremanei@@@TRINITY_DN1155_c0_g1_i10.p1,cremanei@@@TRINITY_DN1155_c0_g1_i12.p1,cremanei@@@TRINITY_DN1155_c0_g1_i15.p1,cremanei@@@TRINITY_DN1155_c0_g1_i2.p1,cremanei@@@TRINITY_DN1155_c0_g1_i9.p1,cremanei@@@TRINITY_DN1155_c0_g1_i8.p1,cremanei@@@TRINITY_DN9200_c0_g1_i2.p1	ppacificus@@@TRINITY_DN7516_c0_g1_i1.p1,ppacificus@@@TRINITY_DN1589_c0_g1_i2.p1
137	14	31	0.654	CEW1@@@TRINITY_DN3608_c0_g1_i1.p1,CEW1@@@TRINITY_DN3608_c0_g1_i3.p1	DF5006@@@TRINITY_DN1905_c0_g1_i1.p1,DF5006@@@TRINITY_DN1905_c0_g1_i2.p1,DF5006@@@TRINITY_DN1905_c0_g1_i3.p1	DF5012@@@TRINITY_DN3812_c0_g1_i4.p1	DF5112@@@TRINITY_DN343_c1_g2_i1.p2,DF5112@@@TRINITY_DN343_c1_g2_i3.p1	MT8872@@@TRINITY_DN14406_c0_g1_i1.p1	F30F8.2	cbrenneri@@@TRINITY_DN4313_c0_g1_i1.p1,cbrenneri@@@TRINITY_DN4313_c0_g1_i4.p1,cbrenneri@@@TRINITY_DN4313_c0_g1_i6.p1	cbriggsae@@@TRINITY_DN127_c0_g1_i2.p1,cbriggsae@@@TRINITY_DN127_c0_g1_i3.p1,cbriggsae@@@TRINITY_DN127_c0_g1_i4.p1	celegans@@@TRINITY_DN12396_c0_g1_i1.p1,celegans@@@TRINITY_DN12396_c0_g1_i2.p1,celegans@@@TRINITY_DN12396_c0_g1_i3.p1	celegans@@@TRINITY_GG_22317_c0_g1_i2.p1,celegans@@@TRINITY_GG_22317_c0_g1_i1.p1,celegans@@@TRINITY_GG_22317_c0_g1_i3.p1	cinopinata@@@TRINITY_DN6676_c0_g1_i1.p2,cinopinata@@@TRINITY_DN6676_c0_g1_i2.p2	cjaponica@@@TRINITY_DN81_c1_g1_i1.p1,cjaponica@@@TRINITY_DN81_c1_g1_i2.p1,cjaponica@@@TRINITY_DN81_c1_g1_i3.p1	cremanei@@@TRINITY_DN3808_c0_g1_i2.p1,cremanei@@@TRINITY_DN3808_c0_g1_i3.p1	ppacificus@@@TRINITY_DN5330_c0_g1_i1.p1,ppacificus@@@TRINITY_DN5330_c0_g1_i2.p1
138	14	31	0.642	CEW1@@@TRINITY_DN986_c0_g1_i3.p1,CEW1@@@TRINITY_DN986_c0_g1_i7.p1	DF5006@@@TRINITY_DN44_c0_g1_i1.p1	DF5012@@@TRINITY_DN47_c0_g1_i1.p1,DF5012@@@TRINITY_DN47_c0_g1_i3.p1	DF5112@@@TRINITY_DN382_c0_g1_i1.p1,DF5112@@@TRINITY_DN382_c0_g1_i2.p1,DF5112@@@TRINITY_DN382_c0_g1_i3.p1,DF5112@@@TRINITY_DN382_c0_g1_i5.p1	MT8872@@@TRINITY_DN216_c0_g1_i2.p1,MT8872@@@TRINITY_DN216_c0_g1_i3.p1	Y39A1A.22	cbrenneri@@@TRINITY_DN42_c0_g1_i1.p1,cbrenneri@@@TRINITY_DN42_c0_g1_i2.p1	cbriggsae@@@TRINITY_DN16_c0_g1_i1.p1	celegans@@@TRINITY_DN371_c1_g1_i2.p1	celegans@@@TRINITY_GG_20680_c0_g1_i2.p1	cinopinata@@@TRINITY_DN139_c0_g1_i1.p1,cinopinata@@@TRINITY_DN139_c0_g1_i2.p1,cinopinata@@@TRINITY_DN139_c0_g1_i3.p1,cinopinata@@@TRINITY_DN139_c0_g1_i4.p1,cinopinata@@@TRINITY_DN139_c0_g1_i5.p1,cinopinata@@@TRINITY_DN139_c0_g1_i8.p1	cjaponica@@@TRINITY_DN7176_c0_g2_i1.p1	cremanei@@@TRINITY_DN411_c0_g1_i1.p1	ppacificus@@@TRINITY_DN48_c0_g2_i1.p1,ppacificus@@@TRINITY_DN48_c0_g2_i2.p1,ppacificus@@@TRINITY_DN48_c0_g2_i3.p1,ppacificus@@@TRINITY_DN48_c0_g2_i5.p1,ppacificus@@@TRINITY_DN48_c0_g2_i6.p1,ppacificus@@@TRINITY_DN48_c0_g2_i7.p1
139	14	31	0.595	CEW1@@@TRINITY_DN1331_c0_g1_i6.p1	DF5006@@@TRINITY_DN3177_c0_g1_i1.p1,DF5006@@@TRINITY_DN3177_c0_g1_i3.p1	DF5012@@@TRINITY_DN4110_c0_g1_i1.p1,DF5012@@@TRINITY_DN4110_c0_g1_i4.p1,DF5012@@@TRINITY_DN4110_c0_g1_i6.p1,DF5012@@@TRINITY_DN4110_c0_g1_i3.p1	DF5112@@@TRINITY_DN1053_c0_g1_i1.p1,DF5112@@@TRINITY_DN1053_c0_g1_i2.p1	MT8872@@@TRINITY_DN2615_c0_g1_i1.p1,MT8872@@@TRINITY_DN2615_c0_g1_i2.p1	C50C3.9a,C50C3.9c	cbrenneri@@@TRINITY_DN6316_c0_g1_i4.p1,cbrenneri@@@TRINITY_DN6316_c0_g1_i1.p1	cbriggsae@@@TRINITY_DN3634_c0_g2_i4.p1,cbriggsae@@@TRINITY_DN3634_c0_g2_i1.p1	celegans@@@TRINITY_DN3135_c0_g1_i1.p1,celegans@@@TRINITY_DN3135_c0_g1_i2.p1	celegans@@@TRINITY_GG_20300_c0_g1_i1.p1,celegans@@@TRINITY_GG_20300_c0_g1_i2.p1	cinopinata@@@TRINITY_DN8204_c0_g1_i2.p1,cinopinata@@@TRINITY_DN8204_c0_g1_i4.p1	cjaponica@@@TRINITY_DN342_c0_g1_i4.p1,cjaponica@@@TRINITY_DN342_c0_g1_i5.p1	cremanei@@@TRINITY_DN4297_c0_g1_i2.p1,cremanei@@@TRINITY_DN4297_c0_g1_i3.p1	ppacificus@@@TRINITY_DN1263_c0_g1_i12.p1,ppacificus@@@TRINITY_DN1263_c0_g1_i14.p1,ppacificus@@@TRINITY_DN1263_c0_g1_i15.p1,ppacificus@@@TRINITY_DN1263_c0_g1_i5.p1
140	14	31	0.562	CEW1@@@TRINITY_DN335_c0_g1_i10.p1,CEW1@@@TRINITY_DN335_c0_g1_i3.p1,CEW1@@@TRINITY_DN335_c0_g1_i5.p1,CEW1@@@TRINITY_DN335_c0_g1_i9.p1	DF5006@@@TRINITY_DN3046_c1_g1_i1.p1,DF5006@@@TRINITY_DN3046_c1_g1_i3.p1,DF5006@@@TRINITY_DN3046_c1_g1_i4.p1	DF5012@@@TRINITY_DN2172_c0_g1_i1.p1,DF5012@@@TRINITY_DN2172_c0_g1_i13.p1,DF5012@@@TRINITY_DN2172_c0_g1_i5.p1,DF5012@@@TRINITY_DN2172_c0_g1_i8.p1	DF5112@@@TRINITY_DN1846_c0_g1_i1.p1,DF5112@@@TRINITY_DN1846_c0_g1_i2.p1	MT8872@@@TRINITY_DN3254_c0_g1_i1.p1	F19C6.1	cbrenneri@@@TRINITY_DN4160_c0_g1_i1.p1,cbrenneri@@@TRINITY_DN4160_c0_g1_i2.p1	cbriggsae@@@TRINITY_DN6173_c0_g1_i1.p1	celegans@@@TRINITY_DN4900_c0_g2_i5.p1,celegans@@@TRINITY_DN4900_c0_g2_i6.p1	celegans@@@TRINITY_GG_15910_c0_g1_i1.p1,celegans@@@TRINITY_GG_15910_c0_g1_i2.p1	cinopinata@@@TRINITY_DN4034_c0_g1_i1.p1,cinopinata@@@TRINITY_DN4034_c0_g1_i2.p1,cinopinata@@@TRINITY_DN4034_c0_g1_i4.p1	cjaponica@@@TRINITY_DN861_c0_g1_i1.p1	cremanei@@@TRINITY_DN4393_c0_g1_i6.p1,cremanei@@@TRINITY_DN4393_c0_g1_i2.p1,cremanei@@@TRINITY_DN4393_c0_g1_i3.p1	ppacificus@@@TRINITY_DN13472_c0_g1_i1.p1,ppacificus@@@TRINITY_DN13472_c0_g1_i6.p1
141	14	31	0.345	CEW1@@@TRINITY_DN5656_c0_g1_i1.p1,CEW1@@@TRINITY_DN5656_c0_g1_i2.p1	DF5006@@@TRINITY_DN1210_c0_g1_i2.p1,DF5006@@@TRINITY_DN1210_c0_g1_i1.p1	DF5012@@@TRINITY_DN3606_c0_g1_i1.p1,DF5012@@@TRINITY_DN3606_c0_g1_i4.p1	DF5112@@@TRINITY_DN5470_c0_g2_i2.p1	MT8872@@@TRINITY_DN20970_c0_g1_i1.p1	T16A9.4a,T16A9.4b,T16A9.4d,T16A9.4c	cbrenneri@@@TRINITY_DN14776_c0_g2_i4.p1,cbrenneri@@@TRINITY_DN14776_c0_g2_i1.p1	cbriggsae@@@TRINITY_DN4693_c0_g1_i10.p1,cbriggsae@@@TRINITY_DN4693_c0_g1_i9.p1,cbriggsae@@@TRINITY_DN4693_c0_g1_i2.p1	celegans@@@TRINITY_DN3360_c0_g1_i2.p1,celegans@@@TRINITY_DN3360_c0_g1_i3.p1,celegans@@@TRINITY_DN3360_c0_g1_i4.p1,celegans@@@TRINITY_DN3360_c0_g1_i1.p1	celegans@@@TRINITY_GG_19087_c0_g1_i1.p1,celegans@@@TRINITY_GG_19087_c0_g1_i2.p1	cinopinata@@@TRINITY_DN5802_c0_g1_i1.p1,cinopinata@@@TRINITY_DN5802_c0_g1_i2.p1	cjaponica@@@TRINITY_DN4128_c0_g1_i3.p1,cjaponica@@@TRINITY_DN4128_c0_g1_i2.p1	cremanei@@@TRINITY_DN8859_c0_g1_i3.p1,cremanei@@@TRINITY_DN8859_c0_g1_i5.p1,cremanei@@@TRINITY_DN8859_c0_g1_i4.p1	ppacificus@@@TRINITY_DN7972_c0_g1_i2.p1
142	14	31	0.28	CEW1@@@TRINITY_DN1165_c0_g1_i1.p1,CEW1@@@TRINITY_DN1165_c0_g1_i2.p1,CEW1@@@TRINITY_DN1165_c0_g1_i3.p1,CEW1@@@TRINITY_DN1165_c0_g1_i4.p1,CEW1@@@TRINITY_DN1165_c0_g1_i5.p1	DF5006@@@TRINITY_DN5762_c0_g1_i1.p1	DF5012@@@TRINITY_DN3794_c0_g1_i2.p1,DF5012@@@TRINITY_DN3794_c0_g1_i1.p1,DF5012@@@TRINITY_DN3794_c0_g1_i3.p1	DF5112@@@TRINITY_DN1658_c0_g1_i1.p1,DF5112@@@TRINITY_DN1658_c0_g1_i2.p1	MT8872@@@TRINITY_DN780_c0_g1_i9.p1,MT8872@@@TRINITY_DN780_c0_g1_i7.p1,MT8872@@@TRINITY_DN780_c0_g1_i5.p1,MT8872@@@TRINITY_DN780_c0_g1_i3.p1,MT8872@@@TRINITY_DN780_c0_g1_i10.p1,MT8872@@@TRINITY_DN780_c0_g1_i2.p1	Y105C5B.21a,Y105C5B.21e,Y105C5B.21c,Y105C5B.21f	cbrenneri@@@TRINITY_DN22087_c0_g1_i1.p1	cbriggsae@@@TRINITY_DN3005_c0_g1_i1.p1	celegans@@@TRINITY_DN1899_c0_g1_i1.p1	celegans@@@TRINITY_GG_14677_c0_g1_i1.p1	cinopinata@@@TRINITY_DN3086_c0_g1_i4.p1	cjaponica@@@TRINITY_DN2762_c0_g2_i1.p1	cremanei@@@TRINITY_DN2114_c0_g1_i5.p1	ppacificus@@@TRINITY_DN2566_c0_g1_i2.p1,ppacificus@@@TRINITY_DN2566_c0_g1_i3.p1,ppacificus@@@TRINITY_DN2566_c0_g1_i4.p1
143	14	31	0.277	CEW1@@@TRINITY_DN1968_c0_g1_i3.p1,CEW1@@@TRINITY_DN1968_c0_g1_i9.p1	DF5006@@@TRINITY_DN2189_c0_g1_i2.p1,DF5006@@@TRINITY_DN2189_c0_g1_i1.p1	DF5012@@@TRINITY_DN6659_c0_g1_i1.p1,DF5012@@@TRINITY_DN6659_c0_g1_i2.p1,DF5012@@@TRINITY_DN6659_c0_g1_i4.p1,DF5012@@@TRINITY_DN6659_c0_g1_i5.p1,DF5012@@@TRINITY_DN6659_c0_g1_i6.p1	DF5112@@@TRINITY_DN3191_c0_g1_i4.p1,DF5112@@@TRINITY_DN3191_c0_g1_i2.p1	MT8872@@@TRINITY_DN3151_c0_g1_i2.p1	C40C9.5e,C40C9.5a,C40C9.5g,C40C9.5b,C40C9.5f	cbrenneri@@@TRINITY_DN6634_c0_g1_i2.p1,cbrenneri@@@TRINITY_DN6634_c0_g1_i1.p1	cbriggsae@@@TRINITY_DN6712_c0_g2_i1.p1	celegans@@@TRINITY_DN4968_c0_g1_i6.p1,celegans@@@TRINITY_DN4968_c0_g1_i2.p1	celegans@@@TRINITY_GG_16834_c0_g1_i6.p1,celegans@@@TRINITY_GG_16834_c0_g1_i2.p1	cinopinata@@@TRINITY_DN5431_c0_g1_i1.p1	cjaponica@@@TRINITY_DN4046_c0_g1_i7.p1,cjaponica@@@TRINITY_DN4046_c0_g1_i3.p1	cremanei@@@TRINITY_DN8667_c0_g1_i6.p1,cremanei@@@TRINITY_DN8667_c0_g1_i7.p1	ppacificus@@@TRINITY_DN1404_c0_g1_i1.p1,ppacificus@@@TRINITY_DN1404_c0_g1_i5.p1
144	14	31	0.145	CEW1@@@TRINITY_DN19932_c0_g1_i1.p1	DF5006@@@TRINITY_DN4802_c0_g1_i1.p1,DF5006@@@TRINITY_DN4802_c0_g1_i2.p1	DF5012@@@TRINITY_DN2129_c0_g1_i1.p1,DF5012@@@TRINITY_DN2129_c0_g1_i2.p1	DF5112@@@TRINITY_DN172_c0_g1_i1.p1	MT8872@@@TRINITY_DN273_c0_g1_i1.p1,MT8872@@@TRINITY_DN273_c0_g1_i2.p1	F59A2.1a,F59A2.1b	cbrenneri@@@TRINITY_DN630_c0_g1_i5.p1,cbrenneri@@@TRINITY_DN630_c0_g1_i2.p1,cbrenneri@@@TRINITY_DN630_c0_g1_i3.p1	cbriggsae@@@TRINITY_DN1280_c0_g1_i2.p1,cbriggsae@@@TRINITY_DN1280_c0_g1_i1.p1,cbriggsae@@@TRINITY_DN1280_c0_g1_i4.p1,cbriggsae@@@TRINITY_DN1280_c0_g1_i5.p1	celegans@@@TRINITY_DN556_c0_g2_i1.p1,celegans@@@TRINITY_DN556_c0_g2_i2.p1	celegans@@@TRINITY_GG_21155_c0_g1_i1.p1,celegans@@@TRINITY_GG_21155_c0_g1_i2.p1	cinopinata@@@TRINITY_DN2_c1_g1_i1.p1	cjaponica@@@TRINITY_DN356_c0_g1_i2.p1,cjaponica@@@TRINITY_DN356_c0_g1_i1.p1	cremanei@@@TRINITY_DN7346_c0_g1_i2.p1,cremanei@@@TRINITY_DN7346_c0_g1_i4.p1,cremanei@@@TRINITY_DN7346_c0_g1_i7.p1	ppacificus@@@TRINITY_DN873_c0_g1_i2.p1,ppacificus@@@TRINITY_DN873_c0_g1_i1.p1,ppacificus@@@TRINITY_DN873_c0_g1_i3.p1,ppacificus@@@TRINITY_DN873_c0_g1_i4.p1
145	14	31	0.138	CEW1@@@TRINITY_DN4594_c0_g1_i1.p1	DF5006@@@TRINITY_DN16847_c0_g1_i1.p1	DF5012@@@TRINITY_DN15926_c0_g1_i1.p1	DF5112@@@TRINITY_DN2850_c0_g1_i1.p1,DF5112@@@TRINITY_DN2850_c0_g1_i2.p1	MT8872@@@TRINITY_DN3871_c0_g1_i1.p1,MT8872@@@TRINITY_DN3871_c0_g1_i2.p1	T22B7.1a,T22B7.1c,T22B7.1e	cbrenneri@@@TRINITY_DN4173_c0_g1_i2.p1,cbrenneri@@@TRINITY_DN4173_c0_g1_i1.p1	cbriggsae@@@TRINITY_DN2749_c0_g1_i1.p1,cbriggsae@@@TRINITY_DN2749_c0_g1_i2.p1	celegans@@@TRINITY_DN2746_c0_g1_i1.p1,celegans@@@TRINITY_DN2746_c0_g1_i5.p1,celegans@@@TRINITY_DN2746_c0_g1_i7.p1	celegans@@@TRINITY_GG_5093_c0_g1_i4.p1,celegans@@@TRINITY_GG_5093_c0_g1_i6.p1	cinopinata@@@TRINITY_DN4456_c0_g1_i3.p1,cinopinata@@@TRINITY_DN4456_c0_g1_i4.p1,cinopinata@@@TRINITY_DN4456_c0_g1_i2.p1	cjaponica@@@TRINITY_DN6007_c0_g1_i1.p1,cjaponica@@@TRINITY_DN6007_c0_g1_i2.p1	cremanei@@@TRINITY_DN7414_c0_g1_i3.p1,cremanei@@@TRINITY_DN7414_c0_g1_i4.p1,cremanei@@@TRINITY_DN7414_c0_g1_i6.p1,cremanei@@@TRINITY_DN7414_c0_g1_i7.p1,cremanei@@@TRINITY_DN7414_c0_g1_i9.p1	ppacificus@@@TRINITY_DN3597_c0_g1_i1.p1,ppacificus@@@TRINITY_DN3597_c0_g1_i2.p1
146	14	31	0.127	CEW1@@@TRINITY_DN18507_c0_g1_i1.p1	DF5006@@@TRINITY_DN5805_c0_g1_i1.p1	DF5012@@@TRINITY_DN1412_c0_g1_i1.p1	DF5112@@@TRINITY_DN6166_c1_g2_i1.p1	MT8872@@@TRINITY_DN6297_c0_g1_i1.p1	K07C5.5,K02F3.6	cbrenneri@@@TRINITY_DN31932_c0_g1_i1.p1,cbrenneri@@@TRINITY_DN7866_c0_g1_i1.p1	cbriggsae@@@TRINITY_DN13392_c0_g3_i1.p1,cbriggsae@@@TRINITY_DN19637_c0_g1_i1.p1	celegans@@@TRINITY_DN23948_c0_g1_i1.p1,celegans@@@TRINITY_DN17492_c0_g1_i1.p1	celegans@@@TRINITY_GG_18080_c0_g1_i1.p1,celegans@@@TRINITY_GG_20004_c0_g1_i1.p1	cinopinata@@@TRINITY_DN6969_c0_g1_i1.p1,cinopinata@@@TRINITY_DN9609_c0_g1_i1.p1	cjaponica@@@TRINITY_DN429_c0_g1_i1.p1,cjaponica@@@TRINITY_DN429_c0_g1_i2.p1,cjaponica@@@TRINITY_DN11414_c0_g1_i1.p1,cjaponica@@@TRINITY_DN11414_c0_g2_i1.p1	cremanei@@@TRINITY_DN5007_c0_g1_i1.p1,cremanei@@@TRINITY_DN5007_c0_g1_i2.p1,cremanei@@@TRINITY_DN6675_c0_g1_i1.p1	ppacificus@@@TRINITY_DN4277_c0_g2_i2.p1,ppacificus@@@TRINITY_DN4277_c0_g3_i1.p1,ppacificus@@@TRINITY_DN4277_c0_g3_i4.p1,ppacificus@@@TRINITY_DN4646_c0_g1_i1.p1,ppacificus@@@TRINITY_DN4646_c0_g1_i2.p1,ppacificus@@@TRINITY_DN4277_c0_g1_i1.p1,ppacificus@@@TRINITY_DN13432_c0_g1_i1.p1
147	14	31	0.11	CEW1@@@TRINITY_DN8201_c0_g1_i1.p1	DF5006@@@TRINITY_DN5123_c0_g1_i2.p1,DF5006@@@TRINITY_DN5123_c0_g1_i3.p1,DF5006@@@TRINITY_DN5123_c0_g1_i4.p1,DF5006@@@TRINITY_DN5123_c0_g1_i7.p1,DF5006@@@TRINITY_DN5123_c0_g1_i6.p1	DF5012@@@TRINITY_DN1384_c0_g1_i1.p1,DF5012@@@TRINITY_DN1384_c0_g1_i2.p1,DF5012@@@TRINITY_DN1384_c0_g1_i5.p1,DF5012@@@TRINITY_DN1384_c0_g1_i6.p1,DF5012@@@TRINITY_DN1384_c0_g1_i7.p1,DF5012@@@TRINITY_DN1384_c0_g1_i8.p1	DF5112@@@TRINITY_DN5686_c0_g1_i1.p1	MT8872@@@TRINITY_DN2158_c0_g1_i1.p1,MT8872@@@TRINITY_DN2158_c0_g1_i2.p1,MT8872@@@TRINITY_DN2158_c0_g1_i3.p1	ZK177.8a,ZK177.8b	cbrenneri@@@TRINITY_DN7200_c0_g3_i1.p1	cbriggsae@@@TRINITY_DN994_c0_g2_i1.p1,cbriggsae@@@TRINITY_DN994_c0_g2_i2.p1	celegans@@@TRINITY_DN4568_c0_g1_i2.p1	celegans@@@TRINITY_GG_12295_c0_g1_i1.p1	cinopinata@@@TRINITY_DN559_c0_g1_i1.p1,cinopinata@@@TRINITY_DN559_c0_g1_i3.p1,cinopinata@@@TRINITY_DN559_c0_g1_i4.p1,cinopinata@@@TRINITY_DN559_c0_g1_i7.p1	cjaponica@@@TRINITY_DN988_c0_g1_i1.p1	cremanei@@@TRINITY_DN1236_c0_g1_i1.p1,cremanei@@@TRINITY_DN1236_c0_g1_i2.p1	ppacificus@@@TRINITY_DN6525_c0_g1_i1.p1
148	14	31	0.109	CEW1@@@TRINITY_DN14749_c0_g1_i1.p1	DF5006@@@TRINITY_DN84_c0_g1_i1.p1,DF5006@@@TRINITY_DN84_c0_g1_i3.p1	DF5012@@@TRINITY_DN3512_c0_g3_i1.p1	DF5112@@@TRINITY_DN204_c0_g1_i1.p1	MT8872@@@TRINITY_DN577_c0_g1_i1.p1	Y53H1C.2a,Y53H1C.2c	cbrenneri@@@TRINITY_DN6253_c0_g1_i1.p1	cbriggsae@@@TRINITY_DN1825_c0_g1_i1.p1,cbriggsae@@@TRINITY_DN1825_c0_g1_i2.p1	celegans@@@TRINITY_DN5310_c0_g1_i4.p1,celegans@@@TRINITY_DN5310_c0_g1_i2.p1,celegans@@@TRINITY_DN5310_c0_g1_i3.p1,celegans@@@TRINITY_DN5310_c0_g1_i5.p1	celegans@@@TRINITY_GG_22127_c0_g1_i2.p1	cinopinata@@@TRINITY_DN182_c0_g1_i5.p1,cinopinata@@@TRINITY_DN182_c0_g1_i10.p1,cinopinata@@@TRINITY_DN182_c0_g1_i3.p1,cinopinata@@@TRINITY_DN182_c0_g1_i4.p1,cinopinata@@@TRINITY_DN182_c0_g1_i12.p1	cjaponica@@@TRINITY_DN4780_c0_g1_i1.p1	cremanei@@@TRINITY_DN8210_c0_g1_i6.p1,cremanei@@@TRINITY_DN8210_c0_g1_i7.p1,cremanei@@@TRINITY_DN8210_c0_g1_i2.p1,cremanei@@@TRINITY_DN8210_c0_g1_i4.p1,cremanei@@@TRINITY_DN8210_c0_g1_i10.p1,cremanei@@@TRINITY_DN8210_c0_g1_i12.p1,cremanei@@@TRINITY_DN8210_c0_g1_i9.p1,cremanei@@@TRINITY_DN8210_c0_g1_i11.p1	ppacificus@@@TRINITY_DN33686_c0_g1_i1.p1
149	14	30	0.631	CEW1@@@TRINITY_DN1208_c0_g1_i3.p1	DF5006@@@TRINITY_DN6604_c0_g1_i1.p1	DF5012@@@TRINITY_DN1216_c0_g1_i1.p1,DF5012@@@TRINITY_DN1216_c0_g1_i2.p1,DF5012@@@TRINITY_DN1216_c0_g1_i3.p1	DF5112@@@TRINITY_DN6721_c0_g2_i1.p1	MT8872@@@TRINITY_DN2930_c0_g1_i1.p1	R09G11.2a,R09G11.2c	cbrenneri@@@TRINITY_DN429_c0_g1_i1.p1,cbrenneri@@@TRINITY_DN429_c0_g1_i2.p1,cbrenneri@@@TRINITY_DN429_c0_g1_i4.p1	cbriggsae@@@TRINITY_DN1770_c0_g1_i1.p1	celegans@@@TRINITY_DN1540_c0_g1_i1.p1,celegans@@@TRINITY_DN1540_c0_g1_i2.p1,celegans@@@TRINITY_DN1540_c0_g1_i3.p1	celegans@@@TRINITY_GG_5255_c0_g1_i1.p1,celegans@@@TRINITY_GG_5255_c0_g1_i2.p1,celegans@@@TRINITY_GG_5255_c0_g1_i3.p1	cinopinata@@@TRINITY_DN1557_c0_g1_i1.p1,cinopinata@@@TRINITY_DN1557_c0_g1_i2.p1	cjaponica@@@TRINITY_DN18301_c1_g1_i1.p1	cremanei@@@TRINITY_DN5827_c0_g2_i1.p1,cremanei@@@TRINITY_DN5827_c0_g2_i2.p1,cremanei@@@TRINITY_DN5827_c0_g2_i3.p1,cremanei@@@TRINITY_DN5827_c0_g2_i4.p1,cremanei@@@TRINITY_DN5827_c0_g2_i5.p1,cremanei@@@TRINITY_DN5827_c0_g2_i6.p1	ppacificus@@@TRINITY_DN2807_c1_g2_i2.p1,ppacificus@@@TRINITY_DN2807_c1_g2_i3.p1
150	14	30	0.523	CEW1@@@TRINITY_DN781_c0_g1_i2.p1,CEW1@@@TRINITY_DN781_c0_g1_i4.p1,CEW1@@@TRINITY_DN781_c0_g1_i6.p1	DF5006@@@TRINITY_DN178_c0_g1_i2.p1,DF5006@@@TRINITY_DN178_c0_g1_i4.p1,DF5006@@@TRINITY_DN178_c0_g1_i5.p1	DF5012@@@TRINITY_DN725_c0_g1_i1.p1,DF5012@@@TRINITY_DN725_c0_g1_i2.p1,DF5012@@@TRINITY_DN725_c0_g1_i3.p1	DF5112@@@TRINITY_DN303_c0_g1_i1.p1,DF5112@@@TRINITY_DN303_c0_g1_i2.p1	MT8872@@@TRINITY_DN654_c0_g1_i1.p1,MT8872@@@TRINITY_DN654_c0_g1_i2.p1	T08G11.1a,T08G11.1b	cbrenneri@@@TRINITY_DN1157_c0_g1_i1.p1,cbrenneri@@@TRINITY_DN1157_c0_g1_i3.p1	cbriggsae@@@TRINITY_DN672_c0_g1_i1.p1,cbriggsae@@@TRINITY_DN672_c0_g1_i2.p1	celegans@@@TRINITY_DN590_c0_g1_i1.p1,celegans@@@TRINITY_DN590_c0_g1_i2.p1	celegans@@@TRINITY_GG_22700_c0_g1_i1.p1,celegans@@@TRINITY_GG_22700_c0_g1_i2.p1	cinopinata@@@TRINITY_DN1072_c0_g1_i1.p1,cinopinata@@@TRINITY_DN1072_c0_g1_i3.p1	cjaponica@@@TRINITY_DN3661_c0_g2_i1.p1,cjaponica@@@TRINITY_DN3661_c0_g2_i2.p1	cremanei@@@TRINITY_DN1120_c0_g1_i1.p1	ppacificus@@@TRINITY_DN5401_c0_g1_i2.p1,ppacificus@@@TRINITY_DN5401_c0_g1_i3.p1
151	14	30	0.257	CEW1@@@TRINITY_DN16416_c0_g1_i1.p2	DF5006@@@TRINITY_DN7_c0_g3_i1.p1	DF5012@@@TRINITY_DN15662_c0_g1_i1.p2	DF5112@@@TRINITY_DN3839_c0_g1_i1.p1,DF5112@@@TRINITY_DN3839_c0_g1_i2.p1	MT8872@@@TRINITY_DN408_c0_g2_i1.p1,MT8872@@@TRINITY_DN408_c0_g2_i2.p1	Y75B12B.2,Y75B12B.5	cbrenneri@@@TRINITY_DN1771_c0_g1_i1.p1	cbriggsae@@@TRINITY_DN715_c0_g1_i1.p1,cbriggsae@@@TRINITY_DN57_c0_g1_i2.p1,cbriggsae@@@TRINITY_DN57_c0_g1_i1.p1,cbriggsae@@@TRINITY_DN57_c0_g1_i3.p1	celegans@@@TRINITY_DN209_c0_g2_i1.p1,celegans@@@TRINITY_DN209_c0_g2_i2.p1	celegans@@@TRINITY_GG_18506_c2_g1_i1.p1,celegans@@@TRINITY_GG_6220_c0_g1_i1.p1,celegans@@@TRINITY_GG_6217_c0_g1_i1.p1	cinopinata@@@TRINITY_DN299_c0_g2_i1.p1,cinopinata@@@TRINITY_DN15884_c0_g1_i1.p1,cinopinata@@@TRINITY_DN299_c0_g1_i1.p1	cjaponica@@@TRINITY_DN23870_c0_g1_i1.p1	cremanei@@@TRINITY_DN234_c0_g1_i1.p1,cremanei@@@TRINITY_DN234_c0_g1_i7.p1,cremanei@@@TRINITY_DN234_c0_g1_i5.p1,cremanei@@@TRINITY_DN5570_c0_g2_i1.p1	ppacificus@@@TRINITY_DN645_c0_g1_i2.p1,ppacificus@@@TRINITY_DN645_c0_g1_i5.p2,ppacificus@@@TRINITY_DN645_c0_g1_i4.p2
152	14	30	0.237	CEW1@@@TRINITY_DN79_c0_g3_i2.p1,CEW1@@@TRINITY_DN79_c0_g3_i5.p1	DF5006@@@TRINITY_DN5914_c1_g1_i6.p1,DF5006@@@TRINITY_DN5914_c1_g1_i7.p1	DF5012@@@TRINITY_DN631_c0_g1_i1.p1,DF5012@@@TRINITY_DN631_c0_g1_i4.p1	DF5112@@@TRINITY_DN267_c0_g1_i6.p1,DF5112@@@TRINITY_DN267_c0_g1_i7.p1	MT8872@@@TRINITY_DN996_c0_g1_i2.p1	Y57G11C.24g,Y57G11C.24o,Y57G11C.24n,Y57G11C.24i,Y57G11C.24a,Y57G11C.24j,Y57G11C.24d,Y57G11C.24k	cbrenneri@@@TRINITY_DN365_c0_g1_i3.p1	cbriggsae@@@TRINITY_DN389_c0_g1_i4.p1,cbriggsae@@@TRINITY_DN389_c0_g1_i1.p1	celegans@@@TRINITY_DN396_c0_g1_i2.p1	celegans@@@TRINITY_GG_3844_c0_g1_i2.p1,celegans@@@TRINITY_GG_3844_c0_g1_i3.p1	cinopinata@@@TRINITY_DN464_c0_g1_i3.p1,cinopinata@@@TRINITY_DN464_c0_g1_i4.p1	cjaponica@@@TRINITY_DN374_c0_g1_i1.p1	cremanei@@@TRINITY_DN627_c0_g1_i7.p1,cremanei@@@TRINITY_DN627_c0_g1_i1.p1	ppacificus@@@TRINITY_DN951_c0_g1_i2.p1,ppacificus@@@TRINITY_DN951_c0_g1_i4.p1
153	14	30	0.182	CEW1@@@TRINITY_DN162_c0_g1_i2.p1,CEW1@@@TRINITY_DN162_c0_g1_i3.p1,CEW1@@@TRINITY_DN162_c0_g1_i4.p1	DF5006@@@TRINITY_DN934_c0_g1_i1.p1,DF5006@@@TRINITY_DN934_c0_g1_i2.p1	DF5012@@@TRINITY_DN701_c0_g1_i12.p2,DF5012@@@TRINITY_DN701_c0_g1_i5.p1,DF5012@@@TRINITY_DN701_c0_g1_i9.p2,DF5012@@@TRINITY_DN701_c0_g1_i2.p1	DF5112@@@TRINITY_DN308_c0_g1_i1.p1,DF5112@@@TRINITY_DN308_c0_g1_i3.p1	MT8872@@@TRINITY_DN17807_c0_g1_i1.p1	C36E6.5,C36E6.3	cbrenneri@@@TRINITY_DN530_c0_g1_i2.p1,cbrenneri@@@TRINITY_DN530_c0_g1_i1.p1	cbriggsae@@@TRINITY_DN143_c0_g1_i1.p1,cbriggsae@@@TRINITY_DN143_c0_g1_i2.p1	celegans@@@TRINITY_DN252_c0_g1_i1.p1,celegans@@@TRINITY_DN252_c0_g1_i2.p1	celegans@@@TRINITY_GG_16453_c0_g1_i1.p1,celegans@@@TRINITY_GG_5261_c1_g1_i1.p2,celegans@@@TRINITY_GG_5261_c0_g1_i1.p2	cinopinata@@@TRINITY_DN248_c0_g1_i1.p2,cinopinata@@@TRINITY_DN248_c0_g1_i2.p1	cjaponica@@@TRINITY_DN559_c0_g1_i3.p1,cjaponica@@@TRINITY_DN559_c0_g1_i2.p1	cremanei@@@TRINITY_DN421_c0_g1_i1.p1,cremanei@@@TRINITY_DN421_c0_g1_i2.p1	ppacificus@@@TRINITY_DN31874_c0_g1_i1.p1
154	14	30	0.181	CEW1@@@TRINITY_DN730_c0_g1_i2.p1	DF5006@@@TRINITY_DN1267_c0_g1_i1.p1,DF5006@@@TRINITY_DN1267_c0_g1_i2.p1	DF5012@@@TRINITY_DN3525_c0_g1_i2.p1,DF5012@@@TRINITY_DN3525_c0_g1_i1.p1	DF5112@@@TRINITY_DN424_c0_g1_i4.p1,DF5112@@@TRINITY_DN424_c0_g1_i2.p1	MT8872@@@TRINITY_DN584_c0_g1_i3.p1,MT8872@@@TRINITY_DN584_c0_g1_i2.p1	B0024.14b,B0024.14d,B0024.14f,B0024.14a	cbrenneri@@@TRINITY_DN11692_c0_g1_i1.p1,cbrenneri@@@TRINITY_DN11692_c0_g1_i2.p1	cbriggsae@@@TRINITY_DN3151_c0_g1_i1.p1,cbriggsae@@@TRINITY_DN3151_c0_g1_i2.p1	celegans@@@TRINITY_DN3521_c0_g1_i2.p1,celegans@@@TRINITY_DN3521_c0_g1_i3.p1	celegans@@@TRINITY_GG_18100_c0_g1_i1.p1,celegans@@@TRINITY_GG_18100_c0_g1_i2.p1	cinopinata@@@TRINITY_DN621_c0_g1_i1.p1,cinopinata@@@TRINITY_DN621_c0_g1_i2.p1,cinopinata@@@TRINITY_DN621_c0_g1_i4.p1,cinopinata@@@TRINITY_DN621_c0_g1_i3.p1	cjaponica@@@TRINITY_DN1105_c0_g2_i1.p1,cjaponica@@@TRINITY_DN1105_c0_g2_i2.p1	cremanei@@@TRINITY_DN6334_c0_g1_i1.p1,cremanei@@@TRINITY_DN6334_c0_g1_i2.p1	ppacificus@@@TRINITY_DN1036_c0_g1_i1.p1
155	14	30	0.153	CEW1@@@TRINITY_DN628_c0_g1_i2.p1,CEW1@@@TRINITY_DN628_c0_g1_i1.p1	DF5006@@@TRINITY_DN1362_c0_g2_i2.p1,DF5006@@@TRINITY_DN1362_c0_g2_i3.p1,DF5006@@@TRINITY_DN1362_c0_g2_i1.p1	DF5012@@@TRINITY_DN44_c0_g1_i2.p1	DF5112@@@TRINITY_DN1054_c0_g1_i2.p1	MT8872@@@TRINITY_DN2910_c0_g1_i1.p1	H43I07.1b,H43I07.1c,H43I07.1a	cbrenneri@@@TRINITY_DN1169_c0_g1_i1.p1,cbrenneri@@@TRINITY_DN1169_c0_g1_i4.p1,cbrenneri@@@TRINITY_DN1169_c0_g1_i2.p1	cbriggsae@@@TRINITY_DN2703_c0_g1_i4.p1,cbriggsae@@@TRINITY_DN2703_c0_g1_i6.p1,cbriggsae@@@TRINITY_DN2703_c0_g1_i3.p1	celegans@@@TRINITY_DN1460_c1_g2_i2.p1,celegans@@@TRINITY_DN1460_c1_g2_i1.p1	celegans@@@TRINITY_GG_7667_c1_g1_i3.p1,celegans@@@TRINITY_GG_7667_c1_g1_i2.p1	cinopinata@@@TRINITY_DN1146_c0_g1_i1.p1,cinopinata@@@TRINITY_DN1146_c0_g1_i4.p1	cjaponica@@@TRINITY_DN321_c0_g1_i4.p1	cremanei@@@TRINITY_DN4609_c0_g1_i4.p1,cremanei@@@TRINITY_DN4609_c0_g1_i6.p1,cremanei@@@TRINITY_DN4609_c0_g1_i7.p1,cremanei@@@TRINITY_DN4609_c0_g1_i5.p1	ppacificus@@@TRINITY_DN583_c0_g1_i2.p1,ppacificus@@@TRINITY_DN583_c0_g1_i1.p1
156	14	30	0.136	CEW1@@@TRINITY_DN620_c0_g1_i1.p1,CEW1@@@TRINITY_DN620_c0_g1_i2.p1,CEW1@@@TRINITY_DN620_c0_g1_i3.p1	DF5006@@@TRINITY_DN400_c0_g1_i1.p1,DF5006@@@TRINITY_DN400_c0_g1_i3.p1	DF5012@@@TRINITY_DN2005_c0_g1_i4.p1,DF5012@@@TRINITY_DN2005_c0_g1_i2.p1,DF5012@@@TRINITY_DN2005_c0_g1_i3.p1	DF5112@@@TRINITY_DN4006_c0_g1_i2.p1	MT8872@@@TRINITY_DN213_c0_g1_i6.p1	C27H5.2d,C27H5.2b,C27H5.2c	cbrenneri@@@TRINITY_DN6165_c0_g1_i3.p1,cbrenneri@@@TRINITY_DN6165_c0_g1_i4.p1,cbrenneri@@@TRINITY_DN6165_c0_g1_i1.p1	cbriggsae@@@TRINITY_DN2929_c0_g1_i4.p1,cbriggsae@@@TRINITY_DN2929_c0_g1_i5.p1,cbriggsae@@@TRINITY_DN2929_c0_g1_i3.p1	celegans@@@TRINITY_DN8127_c0_g2_i3.p1,celegans@@@TRINITY_DN8127_c0_g2_i2.p1	celegans@@@TRINITY_GG_1623_c1_g1_i1.p1	cinopinata@@@TRINITY_DN2795_c0_g1_i3.p1,cinopinata@@@TRINITY_DN2795_c0_g1_i1.p1	cjaponica@@@TRINITY_DN1968_c0_g1_i3.p1,cjaponica@@@TRINITY_DN1968_c0_g1_i7.p1	cremanei@@@TRINITY_DN4409_c0_g1_i3.p1,cremanei@@@TRINITY_DN4409_c0_g1_i1.p1	ppacificus@@@TRINITY_DN1490_c0_g1_i1.p1,ppacificus@@@TRINITY_DN1490_c0_g1_i2.p1
157	14	29	0.694	CEW1@@@TRINITY_DN519_c0_g1_i1.p1,CEW1@@@TRINITY_DN519_c0_g1_i2.p1,CEW1@@@TRINITY_DN519_c0_g1_i3.p1	DF5006@@@TRINITY_DN425_c0_g1_i1.p1,DF5006@@@TRINITY_DN425_c0_g1_i2.p2	DF5012@@@TRINITY_DN12730_c1_g3_i1.p1,DF5012@@@TRINITY_DN12730_c1_g3_i2.p1,DF5012@@@TRINITY_DN12730_c1_g3_i3.p1	DF5112@@@TRINITY_DN4587_c0_g1_i1.p1,DF5112@@@TRINITY_DN4587_c0_g1_i2.p1	MT8872@@@TRINITY_DN16113_c0_g1_i1.p1	C01G8.5a,C01G8.5b	cbrenneri@@@TRINITY_DN658_c0_g1_i1.p1,cbrenneri@@@TRINITY_DN658_c0_g1_i2.p1	cbriggsae@@@TRINITY_DN514_c0_g1_i1.p1,cbriggsae@@@TRINITY_DN514_c0_g1_i3.p1	celegans@@@TRINITY_DN102_c0_g1_i1.p1,celegans@@@TRINITY_DN102_c0_g1_i2.p1	celegans@@@TRINITY_GG_22554_c0_g1_i1.p1,celegans@@@TRINITY_GG_22554_c0_g1_i2.p1	cinopinata@@@TRINITY_DN453_c0_g1_i1.p1,cinopinata@@@TRINITY_DN453_c0_g1_i2.p1	cjaponica@@@TRINITY_DN16322_c0_g1_i1.p1,cjaponica@@@TRINITY_DN16322_c0_g1_i2.p1	cremanei@@@TRINITY_DN77_c0_g1_i1.p1,cremanei@@@TRINITY_DN77_c0_g1_i2.p1	ppacificus@@@TRINITY_DN226_c0_g1_i1.p1,ppacificus@@@TRINITY_DN226_c0_g1_i2.p1
158	14	29	0.636	CEW1@@@TRINITY_DN223_c0_g1_i1.p1,CEW1@@@TRINITY_DN223_c0_g1_i2.p1	DF5006@@@TRINITY_DN2391_c0_g1_i1.p1,DF5006@@@TRINITY_DN2391_c0_g1_i2.p1	DF5012@@@TRINITY_DN7965_c0_g1_i1.p1	DF5112@@@TRINITY_DN1064_c0_g1_i1.p1,DF5112@@@TRINITY_DN1064_c0_g1_i3.p1,DF5112@@@TRINITY_DN1064_c0_g1_i4.p1,DF5112@@@TRINITY_DN1064_c0_g1_i5.p1	MT8872@@@TRINITY_DN4751_c0_g1_i1.p1	F52C12.4a,F52C12.4b,F52C12.4c,F52C12.4d,F52C12.4e,F52C12.4f,F52C12.4g,F52C12.4h	cbrenneri@@@TRINITY_DN4561_c0_g1_i1.p1,cbrenneri@@@TRINITY_DN4561_c0_g1_i2.p1	cbriggsae@@@TRINITY_DN5201_c0_g1_i1.p1,cbriggsae@@@TRINITY_DN5201_c0_g1_i2.p1	celegans@@@TRINITY_DN2710_c0_g1_i2.p1	celegans@@@TRINITY_GG_2807_c1_g1_i1.p1	cinopinata@@@TRINITY_DN1204_c0_g1_i1.p1,cinopinata@@@TRINITY_DN1204_c0_g1_i2.p1	cjaponica@@@TRINITY_DN7183_c0_g1_i1.p1	cremanei@@@TRINITY_DN5144_c0_g1_i3.p1	ppacificus@@@TRINITY_DN9866_c0_g1_i1.p1
159	14	29	0.622	CEW1@@@TRINITY_DN167_c0_g1_i1.p1,CEW1@@@TRINITY_DN167_c0_g1_i2.p1	DF5006@@@TRINITY_DN8418_c0_g2_i1.p1,DF5006@@@TRINITY_DN8418_c0_g2_i2.p1	DF5012@@@TRINITY_DN337_c0_g1_i1.p1,DF5012@@@TRINITY_DN337_c0_g1_i2.p1	DF5112@@@TRINITY_DN775_c0_g1_i1.p1,DF5112@@@TRINITY_DN775_c0_g1_i3.p1	MT8872@@@TRINITY_DN1062_c0_g1_i1.p1,MT8872@@@TRINITY_DN1062_c0_g1_i2.p1	M03C11.5	cbrenneri@@@TRINITY_DN23651_c1_g1_i1.p1,cbrenneri@@@TRINITY_DN23651_c1_g1_i3.p1	cbriggsae@@@TRINITY_DN795_c0_g2_i1.p1,cbriggsae@@@TRINITY_DN795_c0_g2_i2.p1	celegans@@@TRINITY_DN1963_c0_g1_i1.p1,celegans@@@TRINITY_DN1963_c0_g1_i2.p1	celegans@@@TRINITY_GG_7855_c2_g1_i1.p1,celegans@@@TRINITY_GG_7855_c2_g1_i2.p1	cinopinata@@@TRINITY_DN555_c0_g1_i1.p1,cinopinata@@@TRINITY_DN555_c0_g1_i2.p1	cjaponica@@@TRINITY_DN2502_c0_g1_i1.p1,cjaponica@@@TRINITY_DN2502_c0_g1_i2.p1	cremanei@@@TRINITY_DN1436_c0_g1_i1.p1,cremanei@@@TRINITY_DN1436_c0_g1_i3.p1,cremanei@@@TRINITY_DN1436_c0_g1_i4.p1,cremanei@@@TRINITY_DN1436_c0_g1_i5.p1,cremanei@@@TRINITY_DN1436_c0_g1_i8.p1	ppacificus@@@TRINITY_DN3502_c0_g1_i1.p1
160	14	29	0.591	CEW1@@@TRINITY_DN364_c0_g1_i1.p1,CEW1@@@TRINITY_DN364_c0_g1_i2.p1	DF5006@@@TRINITY_DN348_c0_g1_i1.p1,DF5006@@@TRINITY_DN348_c0_g1_i2.p1	DF5012@@@TRINITY_DN937_c0_g1_i1.p1,DF5012@@@TRINITY_DN937_c0_g1_i2.p1	DF5112@@@TRINITY_DN371_c0_g1_i1.p1,DF5112@@@TRINITY_DN371_c0_g1_i2.p1	MT8872@@@TRINITY_DN1461_c0_g1_i1.p1,MT8872@@@TRINITY_DN1461_c0_g1_i2.p1	T02G5.9b,T02G5.9a	cbrenneri@@@TRINITY_DN716_c0_g1_i1.p1,cbrenneri@@@TRINITY_DN716_c0_g1_i2.p1	cbriggsae@@@TRINITY_DN287_c0_g1_i1.p1,cbriggsae@@@TRINITY_DN287_c0_g1_i2.p1	celegans@@@TRINITY_DN316_c0_g1_i1.p1,celegans@@@TRINITY_DN316_c0_g1_i2.p1	celegans@@@TRINITY_GG_13354_c0_g1_i1.p1,celegans@@@TRINITY_GG_13354_c0_g1_i2.p1	cinopinata@@@TRINITY_DN983_c0_g1_i1.p1,cinopinata@@@TRINITY_DN983_c0_g1_i2.p1	cjaponica@@@TRINITY_DN1001_c0_g1_i1.p1,cjaponica@@@TRINITY_DN1001_c0_g1_i2.p1	cremanei@@@TRINITY_DN963_c0_g1_i2.p1,cremanei@@@TRINITY_DN963_c0_g1_i3.p1,cremanei@@@TRINITY_DN963_c0_g1_i4.p1	ppacificus@@@TRINITY_DN525_c0_g1_i1.p2,ppacificus@@@TRINITY_DN525_c0_g1_i2.p1
161	14	29	0.521	CEW1@@@TRINITY_DN2301_c0_g2_i1.p1,CEW1@@@TRINITY_DN2301_c0_g2_i2.p1	DF5006@@@TRINITY_DN358_c0_g1_i1.p1,DF5006@@@TRINITY_DN358_c0_g1_i2.p1	DF5012@@@TRINITY_DN19364_c0_g1_i1.p1	DF5112@@@TRINITY_DN567_c0_g1_i2.p1,DF5112@@@TRINITY_DN567_c0_g1_i1.p1	MT8872@@@TRINITY_DN8419_c0_g1_i1.p1	Y55F3AL.1a,Y55F3AL.1b	cbrenneri@@@TRINITY_DN4861_c0_g1_i1.p1,cbrenneri@@@TRINITY_DN4861_c0_g1_i2.p1	cbriggsae@@@TRINITY_DN3441_c0_g1_i1.p1,cbriggsae@@@TRINITY_DN3441_c0_g1_i2.p1	celegans@@@TRINITY_DN305_c0_g1_i3.p1,celegans@@@TRINITY_DN305_c0_g1_i2.p1	celegans@@@TRINITY_GG_2468_c0_g1_i1.p1,celegans@@@TRINITY_GG_2468_c0_g1_i4.p1,celegans@@@TRINITY_GG_2468_c0_g1_i6.p1,celegans@@@TRINITY_GG_2468_c0_g1_i2.p1	cinopinata@@@TRINITY_DN422_c0_g4_i1.p1	cjaponica@@@TRINITY_DN191_c1_g1_i1.p1,cjaponica@@@TRINITY_DN191_c1_g1_i4.p1,cjaponica@@@TRINITY_DN191_c1_g1_i5.p1	cremanei@@@TRINITY_DN5783_c0_g1_i1.p1,cremanei@@@TRINITY_DN5783_c0_g1_i3.p1	ppacificus@@@TRINITY_DN3601_c0_g1_i2.p1,ppacificus@@@TRINITY_DN3601_c0_g1_i3.p1,ppacificus@@@TRINITY_DN3601_c0_g1_i1.p1
162	14	29	0.518	CEW1@@@TRINITY_DN578_c0_g1_i1.p1,CEW1@@@TRINITY_DN578_c0_g1_i2.p1	DF5006@@@TRINITY_DN1002_c0_g1_i1.p1	DF5012@@@TRINITY_DN149_c1_g1_i1.p1,DF5012@@@TRINITY_DN149_c1_g1_i2.p1,DF5012@@@TRINITY_DN149_c1_g1_i3.p1	DF5112@@@TRINITY_DN220_c2_g1_i1.p1,DF5112@@@TRINITY_DN220_c2_g1_i2.p1	MT8872@@@TRINITY_DN362_c0_g1_i3.p1	C02F4.2a,C02F4.2c,C02F4.2b	cbrenneri@@@TRINITY_DN1683_c0_g1_i1.p1,cbrenneri@@@TRINITY_DN1683_c0_g1_i2.p1,cbrenneri@@@TRINITY_DN1683_c0_g1_i4.p1	cbriggsae@@@TRINITY_DN1603_c0_g1_i1.p1,cbriggsae@@@TRINITY_DN1603_c0_g1_i2.p1	celegans@@@TRINITY_DN6367_c0_g1_i6.p1,celegans@@@TRINITY_DN6367_c0_g1_i8.p1	celegans@@@TRINITY_GG_13829_c0_g1_i1.p1,celegans@@@TRINITY_GG_13829_c0_g1_i2.p1	cinopinata@@@TRINITY_DN1099_c0_g1_i3.p1	cjaponica@@@TRINITY_DN1841_c0_g1_i3.p1,cjaponica@@@TRINITY_DN1841_c0_g1_i4.p1	cremanei@@@TRINITY_DN9831_c0_g1_i5.p1,cremanei@@@TRINITY_DN9831_c0_g1_i1.p1	ppacificus@@@TRINITY_DN717_c0_g1_i1.p1,ppacificus@@@TRINITY_DN717_c0_g1_i3.p1,ppacificus@@@TRINITY_DN717_c0_g1_i4.p1
163	14	29	0.448	CEW1@@@TRINITY_DN16575_c0_g1_i1.p1	DF5006@@@TRINITY_DN16463_c0_g1_i1.p1,DF5006@@@TRINITY_DN17516_c0_g1_i1.p1	DF5012@@@TRINITY_DN1541_c0_g1_i1.p1	DF5112@@@TRINITY_DN445_c0_g1_i1.p1,DF5112@@@TRINITY_DN445_c0_g1_i5.p1,DF5112@@@TRINITY_DN445_c0_g1_i6.p1,DF5112@@@TRINITY_DN445_c0_g1_i8.p1,DF5112@@@TRINITY_DN445_c0_g1_i9.p1	MT8872@@@TRINITY_DN19614_c0_g1_i1.p1	R102.4a,R102.4b,R102.4c,R102.4d	cbrenneri@@@TRINITY_DN725_c0_g2_i2.p1	cbriggsae@@@TRINITY_DN824_c0_g1_i3.p1,cbriggsae@@@TRINITY_DN824_c0_g1_i1.p1	celegans@@@TRINITY_DN1705_c0_g1_i3.p1	celegans@@@TRINITY_GG_15167_c0_g1_i1.p1	cinopinata@@@TRINITY_DN2110_c0_g1_i2.p1	cjaponica@@@TRINITY_DN1984_c0_g1_i5.p1,cjaponica@@@TRINITY_DN1984_c0_g1_i3.p1,cjaponica@@@TRINITY_DN1984_c0_g1_i4.p1,cjaponica@@@TRINITY_DN1984_c0_g1_i6.p1	cremanei@@@TRINITY_DN1004_c0_g1_i1.p1,cremanei@@@TRINITY_DN1004_c0_g1_i12.p1,cremanei@@@TRINITY_DN1004_c0_g1_i8.p1,cremanei@@@TRINITY_DN1004_c0_g1_i2.p1	ppacificus@@@TRINITY_DN1682_c0_g1_i1.p1
164	14	29	0.437	CEW1@@@TRINITY_DN3707_c0_g2_i3.p1	DF5006@@@TRINITY_DN5621_c0_g1_i1.p1,DF5006@@@TRINITY_DN5621_c0_g1_i2.p1,DF5006@@@TRINITY_DN5621_c0_g1_i3.p1,DF5006@@@TRINITY_DN5621_c0_g1_i4.p1	DF5012@@@TRINITY_DN5613_c0_g1_i3.p1,DF5012@@@TRINITY_DN5613_c0_g1_i6.p1,DF5012@@@TRINITY_DN5613_c0_g1_i8.p1,DF5012@@@TRINITY_DN5613_c0_g1_i2.p1	DF5112@@@TRINITY_DN2152_c3_g1_i3.p1	MT8872@@@TRINITY_DN7027_c0_g1_i1.p1	F12F3.1b,F12F3.1c,F12F3.1d	cbrenneri@@@TRINITY_DN14887_c0_g3_i1.p1	cbriggsae@@@TRINITY_DN6675_c0_g1_i5.p1	celegans@@@TRINITY_DN7475_c0_g1_i3.p1,celegans@@@TRINITY_DN7475_c0_g1_i2.p1,celegans@@@TRINITY_DN7475_c0_g1_i6.p1,celegans@@@TRINITY_DN7475_c0_g1_i4.p1	celegans@@@TRINITY_GG_7035_c0_g1_i1.p1,celegans@@@TRINITY_GG_7035_c0_g1_i2.p1	cinopinata@@@TRINITY_DN14205_c0_g1_i1.p1	cjaponica@@@TRINITY_DN13109_c0_g1_i6.p1	cremanei@@@TRINITY_DN8073_c0_g9_i1.p1,cremanei@@@TRINITY_DN8073_c0_g9_i2.p1	ppacificus@@@TRINITY_DN3188_c0_g1_i2.p1,ppacificus@@@TRINITY_DN3188_c0_g1_i8.p1,ppacificus@@@TRINITY_DN3188_c0_g1_i1.p1
165	14	29	0.437	CEW1@@@TRINITY_DN5293_c0_g1_i1.p1	DF5006@@@TRINITY_DN5042_c0_g1_i1.p1	DF5012@@@TRINITY_DN5350_c0_g1_i1.p1,DF5012@@@TRINITY_DN5350_c0_g1_i2.p1	DF5112@@@TRINITY_DN1817_c0_g1_i1.p1	MT8872@@@TRINITY_DN4865_c0_g1_i1.p1	C12C8.3a,C12C8.3b	cbrenneri@@@TRINITY_DN545_c0_g1_i1.p1,cbrenneri@@@TRINITY_DN545_c0_g1_i4.p1,cbrenneri@@@TRINITY_DN545_c0_g1_i6.p1,cbrenneri@@@TRINITY_DN545_c0_g1_i9.p1	cbriggsae@@@TRINITY_DN726_c0_g1_i1.p1,cbriggsae@@@TRINITY_DN726_c0_g1_i2.p1	celegans@@@TRINITY_DN244_c0_g1_i1.p1,celegans@@@TRINITY_DN244_c0_g1_i2.p1	celegans@@@TRINITY_GG_22630_c0_g1_i1.p1,celegans@@@TRINITY_GG_22630_c0_g1_i2.p1	cinopinata@@@TRINITY_DN510_c0_g1_i1.p1,cinopinata@@@TRINITY_DN510_c0_g1_i2.p1,cinopinata@@@TRINITY_DN510_c0_g1_i3.p1	cjaponica@@@TRINITY_DN840_c0_g1_i1.p1,cjaponica@@@TRINITY_DN840_c0_g1_i2.p1,cjaponica@@@TRINITY_DN840_c0_g1_i3.p1,cjaponica@@@TRINITY_DN840_c0_g1_i4.p1	cremanei@@@TRINITY_DN3310_c1_g1_i1.p1,cremanei@@@TRINITY_DN3310_c1_g1_i8.p1,cremanei@@@TRINITY_DN3310_c1_g1_i9.p1	ppacificus@@@TRINITY_DN6533_c0_g1_i1.p1
166	14	29	0.372	CEW1@@@TRINITY_DN79_c0_g3_i1.p1,CEW1@@@TRINITY_DN79_c0_g3_i4.p1	DF5006@@@TRINITY_DN5914_c1_g1_i2.p1,DF5006@@@TRINITY_DN5914_c1_g1_i1.p1	DF5012@@@TRINITY_DN631_c0_g1_i3.p1,DF5012@@@TRINITY_DN631_c0_g1_i2.p1	DF5112@@@TRINITY_DN267_c0_g1_i1.p1,DF5112@@@TRINITY_DN267_c0_g1_i5.p1,DF5112@@@TRINITY_DN267_c0_g1_i2.p1	MT8872@@@TRINITY_DN996_c0_g1_i1.p1	Y57G11C.24h	cbrenneri@@@TRINITY_DN365_c0_g1_i2.p1,cbrenneri@@@TRINITY_DN365_c0_g1_i1.p1	cbriggsae@@@TRINITY_DN389_c0_g1_i2.p1,cbriggsae@@@TRINITY_DN389_c0_g1_i5.p1,cbriggsae@@@TRINITY_DN389_c0_g1_i3.p1	celegans@@@TRINITY_DN396_c0_g1_i4.p1,celegans@@@TRINITY_DN396_c0_g1_i3.p1	celegans@@@TRINITY_GG_3844_c0_g1_i1.p1	cinopinata@@@TRINITY_DN464_c0_g1_i2.p1,cinopinata@@@TRINITY_DN464_c0_g1_i1.p1	cjaponica@@@TRINITY_DN374_c0_g1_i2.p1,cjaponica@@@TRINITY_DN374_c0_g1_i3.p1	cremanei@@@TRINITY_DN627_c0_g1_i4.p1,cremanei@@@TRINITY_DN627_c0_g1_i5.p1,cremanei@@@TRINITY_DN627_c0_g1_i8.p1,cremanei@@@TRINITY_DN627_c0_g1_i9.p1	ppacificus@@@TRINITY_DN951_c0_g1_i5.p1,ppacificus@@@TRINITY_DN951_c0_g1_i1.p1
167	14	29	0.365	CEW1@@@TRINITY_DN6274_c0_g1_i1.p1	DF5006@@@TRINITY_DN2400_c0_g1_i1.p1	DF5012@@@TRINITY_DN652_c0_g1_i1.p1,DF5012@@@TRINITY_DN652_c0_g1_i3.p1	DF5112@@@TRINITY_DN3198_c0_g2_i2.p1	MT8872@@@TRINITY_DN579_c0_g1_i1.p1,MT8872@@@TRINITY_DN579_c0_g1_i2.p1	W01A8.1b,W01A8.1a,W01A8.1c	cbrenneri@@@TRINITY_DN2779_c0_g1_i1.p1,cbrenneri@@@TRINITY_DN2779_c0_g1_i2.p1,cbrenneri@@@TRINITY_DN2779_c0_g1_i3.p1	cbriggsae@@@TRINITY_DN1163_c0_g1_i1.p1,cbriggsae@@@TRINITY_DN1163_c0_g1_i3.p1,cbriggsae@@@TRINITY_DN1163_c0_g1_i4.p1,cbriggsae@@@TRINITY_DN1163_c0_g1_i5.p1	celegans@@@TRINITY_DN2681_c0_g1_i1.p1	celegans@@@TRINITY_GG_9953_c0_g1_i1.p1	cinopinata@@@TRINITY_DN2658_c0_g1_i1.p1	cjaponica@@@TRINITY_DN93_c0_g1_i1.p1,cjaponica@@@TRINITY_DN93_c0_g1_i2.p1	cremanei@@@TRINITY_DN2184_c0_g2_i4.p1,cremanei@@@TRINITY_DN2184_c0_g2_i1.p1,cremanei@@@TRINITY_DN2184_c0_g2_i2.p1,cremanei@@@TRINITY_DN2184_c0_g2_i3.p1,cremanei@@@TRINITY_DN2184_c0_g2_i5.p1	ppacificus@@@TRINITY_DN4969_c0_g1_i1.p1,ppacificus@@@TRINITY_DN4969_c0_g1_i7.p1
168	14	29	0.355	CEW1@@@TRINITY_DN380_c0_g1_i1.p1,CEW1@@@TRINITY_DN380_c0_g1_i2.p1	DF5006@@@TRINITY_DN2854_c0_g1_i2.p1,DF5006@@@TRINITY_DN2854_c0_g1_i1.p1	DF5012@@@TRINITY_DN2632_c0_g2_i1.p1,DF5012@@@TRINITY_DN2632_c0_g2_i2.p1	DF5112@@@TRINITY_DN490_c0_g1_i2.p1,DF5112@@@TRINITY_DN490_c0_g1_i3.p1	MT8872@@@TRINITY_DN3677_c0_g1_i1.p1	F13C5.6b,F13C5.6a	cbrenneri@@@TRINITY_DN777_c0_g1_i4.p1,cbrenneri@@@TRINITY_DN777_c0_g1_i3.p1	cbriggsae@@@TRINITY_DN6284_c0_g1_i1.p1,cbriggsae@@@TRINITY_DN6284_c0_g1_i2.p1	celegans@@@TRINITY_DN1868_c0_g1_i3.p1,celegans@@@TRINITY_DN1868_c0_g1_i2.p1,celegans@@@TRINITY_DN1868_c0_g1_i1.p1	celegans@@@TRINITY_GG_16514_c0_g1_i2.p1,celegans@@@TRINITY_GG_16514_c0_g1_i1.p1	cinopinata@@@TRINITY_DN1232_c0_g1_i1.p1,cinopinata@@@TRINITY_DN1232_c0_g1_i2.p1	cjaponica@@@TRINITY_DN3368_c0_g1_i1.p1,cjaponica@@@TRINITY_DN3368_c0_g1_i2.p1	cremanei@@@TRINITY_DN1122_c0_g1_i2.p1,cremanei@@@TRINITY_DN1122_c0_g1_i3.p1,cremanei@@@TRINITY_DN1122_c0_g1_i1.p1	ppacificus@@@TRINITY_DN5177_c0_g1_i3.p1,ppacificus@@@TRINITY_DN5177_c0_g1_i4.p1
169	14	29	0.349	CEW1@@@TRINITY_DN8874_c0_g1_i1.p1,CEW1@@@TRINITY_DN8874_c0_g1_i2.p1	DF5006@@@TRINITY_DN148_c0_g1_i1.p1,DF5006@@@TRINITY_DN148_c0_g1_i3.p1,DF5006@@@TRINITY_DN148_c0_g1_i5.p1,DF5006@@@TRINITY_DN148_c0_g1_i8.p1	DF5012@@@TRINITY_DN107_c0_g1_i3.p1,DF5012@@@TRINITY_DN107_c0_g1_i6.p1	DF5112@@@TRINITY_DN2281_c0_g1_i2.p1,DF5112@@@TRINITY_DN2281_c0_g1_i1.p1	MT8872@@@TRINITY_DN158_c0_g1_i1.p1,MT8872@@@TRINITY_DN158_c0_g1_i2.p1	F14B4.2a,F14B4.2b	cbrenneri@@@TRINITY_DN2305_c0_g1_i2.p1,cbrenneri@@@TRINITY_DN2305_c0_g1_i1.p1	cbriggsae@@@TRINITY_DN803_c0_g1_i1.p1,cbriggsae@@@TRINITY_DN803_c0_g1_i2.p1	celegans@@@TRINITY_DN2763_c0_g1_i1.p2,celegans@@@TRINITY_DN2763_c0_g1_i3.p2	celegans@@@TRINITY_GG_22628_c0_g1_i1.p2	cinopinata@@@TRINITY_DN1218_c0_g1_i2.p1,cinopinata@@@TRINITY_DN1218_c0_g1_i1.p1	cjaponica@@@TRINITY_DN837_c0_g1_i1.p1,cjaponica@@@TRINITY_DN837_c0_g1_i2.p1	cremanei@@@TRINITY_DN2423_c0_g1_i3.p1,cremanei@@@TRINITY_DN2423_c0_g1_i2.p1	ppacificus@@@TRINITY_DN773_c0_g1_i1.p1,ppacificus@@@TRINITY_DN773_c0_g1_i2.p1
170	14	29	0.304	CEW1@@@TRINITY_DN3727_c0_g1_i1.p1	DF5006@@@TRINITY_DN3485_c0_g1_i1.p1,DF5006@@@TRINITY_DN3485_c0_g1_i2.p1	DF5012@@@TRINITY_DN5292_c0_g1_i1.p1	DF5112@@@TRINITY_DN602_c0_g1_i2.p1,DF5112@@@TRINITY_DN602_c0_g1_i3.p1	MT8872@@@TRINITY_DN16402_c0_g1_i1.p1	F56C9.10a,F56C9.10b,F56C9.10c,F56C9.10d	cbrenneri@@@TRINITY_DN1125_c0_g3_i1.p1	cbriggsae@@@TRINITY_DN1116_c0_g2_i1.p1,cbriggsae@@@TRINITY_DN1116_c0_g2_i3.p1,cbriggsae@@@TRINITY_DN1116_c0_g2_i6.p1	celegans@@@TRINITY_DN1260_c0_g1_i1.p1,celegans@@@TRINITY_DN1260_c0_g1_i2.p1	celegans@@@TRINITY_GG_20241_c0_g1_i1.p1,celegans@@@TRINITY_GG_20241_c0_g1_i2.p1	cinopinata@@@TRINITY_DN2650_c0_g1_i2.p1,cinopinata@@@TRINITY_DN2650_c0_g1_i1.p1	cjaponica@@@TRINITY_DN279_c0_g3_i1.p1	cremanei@@@TRINITY_DN2182_c0_g1_i1.p1,cremanei@@@TRINITY_DN2182_c0_g1_i2.p1,cremanei@@@TRINITY_DN2182_c0_g1_i5.p1,cremanei@@@TRINITY_DN2182_c0_g1_i8.p1,cremanei@@@TRINITY_DN2182_c0_g1_i9.p1	ppacificus@@@TRINITY_DN5468_c0_g1_i1.p1,ppacificus@@@TRINITY_DN5468_c0_g1_i2.p1
171	14	29	0.29	CEW1@@@TRINITY_DN2617_c0_g1_i1.p1,CEW1@@@TRINITY_DN2617_c0_g1_i3.p1	DF5006@@@TRINITY_DN2577_c0_g1_i2.p1,DF5006@@@TRINITY_DN2577_c0_g1_i3.p1,DF5006@@@TRINITY_DN2577_c0_g1_i4.p1,DF5006@@@TRINITY_DN2577_c0_g1_i1.p1	DF5012@@@TRINITY_DN2247_c0_g1_i2.p1	DF5112@@@TRINITY_DN1467_c0_g1_i1.p1,DF5112@@@TRINITY_DN1467_c0_g1_i2.p1	MT8872@@@TRINITY_DN896_c0_g1_i1.p1,MT8872@@@TRINITY_DN896_c0_g1_i2.p1	F57B9.7b,F57B9.7a	cbrenneri@@@TRINITY_DN9642_c0_g1_i4.p1,cbrenneri@@@TRINITY_DN9642_c0_g1_i6.p1,cbrenneri@@@TRINITY_DN9642_c0_g1_i1.p1,cbrenneri@@@TRINITY_DN9642_c0_g1_i3.p1,cbrenneri@@@TRINITY_DN9642_c0_g1_i5.p1	cbriggsae@@@TRINITY_DN3806_c0_g2_i2.p1,cbriggsae@@@TRINITY_DN3806_c0_g2_i1.p1	celegans@@@TRINITY_DN1215_c0_g1_i2.p1,celegans@@@TRINITY_DN1215_c0_g1_i1.p1	celegans@@@TRINITY_GG_19557_c0_g1_i1.p1	cinopinata@@@TRINITY_DN1508_c0_g1_i2.p1,cinopinata@@@TRINITY_DN1508_c0_g1_i1.p1	cjaponica@@@TRINITY_DN8485_c0_g2_i4.p1	cremanei@@@TRINITY_DN10896_c0_g1_i1.p1,cremanei@@@TRINITY_DN10896_c0_g1_i3.p1	ppacificus@@@TRINITY_DN497_c0_g1_i2.p1
172	14	29	0.275	CEW1@@@TRINITY_DN1452_c0_g1_i1.p1	DF5006@@@TRINITY_DN1535_c0_g1_i1.p1,DF5006@@@TRINITY_DN1535_c0_g1_i2.p1,DF5006@@@TRINITY_DN1535_c0_g1_i3.p1	DF5012@@@TRINITY_DN2680_c0_g2_i1.p1	DF5112@@@TRINITY_DN636_c0_g1_i1.p1,DF5112@@@TRINITY_DN636_c0_g1_i2.p1	MT8872@@@TRINITY_DN576_c0_g1_i2.p1,MT8872@@@TRINITY_DN576_c0_g1_i3.p1	C47E12.4c,C47E12.4a,C47E12.4d	cbrenneri@@@TRINITY_DN194_c0_g1_i2.p1,cbrenneri@@@TRINITY_DN194_c0_g1_i3.p1,cbrenneri@@@TRINITY_DN194_c0_g1_i5.p1	cbriggsae@@@TRINITY_DN1520_c0_g1_i2.p1,cbriggsae@@@TRINITY_DN1520_c0_g1_i1.p1	celegans@@@TRINITY_DN999_c0_g1_i2.p1	celegans@@@TRINITY_GG_15107_c1_g1_i1.p1,celegans@@@TRINITY_GG_15107_c1_g1_i2.p1	cinopinata@@@TRINITY_DN8030_c0_g1_i2.p1,cinopinata@@@TRINITY_DN8030_c0_g1_i4.p1,cinopinata@@@TRINITY_DN8030_c0_g1_i1.p1	cjaponica@@@TRINITY_DN2123_c0_g1_i2.p1	cremanei@@@TRINITY_DN4211_c0_g1_i2.p1,cremanei@@@TRINITY_DN4211_c0_g1_i3.p1	ppacificus@@@TRINITY_DN8011_c0_g1_i1.p1,ppacificus@@@TRINITY_DN8011_c0_g1_i3.p1,ppacificus@@@TRINITY_DN8011_c0_g1_i8.p1
173	14	29	0.271	CEW1@@@TRINITY_DN5403_c0_g1_i1.p1,CEW1@@@TRINITY_DN5403_c0_g1_i2.p1	DF5006@@@TRINITY_DN4964_c0_g1_i1.p1,DF5006@@@TRINITY_DN4964_c0_g1_i2.p1	DF5012@@@TRINITY_DN2591_c0_g1_i1.p1,DF5012@@@TRINITY_DN2591_c0_g1_i2.p1,DF5012@@@TRINITY_DN2591_c0_g1_i4.p1	DF5112@@@TRINITY_DN885_c1_g2_i1.p1,DF5112@@@TRINITY_DN885_c1_g2_i2.p1	MT8872@@@TRINITY_DN2711_c0_g1_i1.p1	C27A7.5d,C27A7.5a,C27A7.5c,C27A7.5e	cbrenneri@@@TRINITY_DN1566_c0_g1_i1.p1,cbrenneri@@@TRINITY_DN1566_c0_g1_i2.p1	cbriggsae@@@TRINITY_DN452_c0_g1_i1.p1,cbriggsae@@@TRINITY_DN452_c0_g1_i2.p1	celegans@@@TRINITY_DN208_c0_g1_i3.p1,celegans@@@TRINITY_DN208_c0_g1_i2.p1	celegans@@@TRINITY_GG_17338_c0_g1_i2.p1,celegans@@@TRINITY_GG_17338_c0_g1_i1.p1	cinopinata@@@TRINITY_DN429_c0_g1_i1.p1,cinopinata@@@TRINITY_DN429_c0_g1_i2.p1	cjaponica@@@TRINITY_DN55_c0_g1_i2.p1,cjaponica@@@TRINITY_DN55_c0_g1_i1.p1	cremanei@@@TRINITY_DN1063_c0_g2_i1.p1,cremanei@@@TRINITY_DN1063_c0_g2_i2.p1	ppacificus@@@TRINITY_DN7415_c0_g1_i1.p1
174	14	29	0.267	CEW1@@@TRINITY_DN1624_c0_g1_i5.p1,CEW1@@@TRINITY_DN1624_c0_g1_i1.p1,CEW1@@@TRINITY_DN1624_c0_g1_i8.p1,CEW1@@@TRINITY_DN1624_c0_g1_i2.p1,CEW1@@@TRINITY_DN1624_c0_g1_i7.p1	DF5006@@@TRINITY_DN7056_c0_g1_i2.p1,DF5006@@@TRINITY_DN7056_c0_g1_i1.p1	DF5012@@@TRINITY_DN5414_c0_g1_i1.p1,DF5012@@@TRINITY_DN5414_c0_g1_i2.p1	DF5112@@@TRINITY_DN3211_c0_g1_i1.p1,DF5112@@@TRINITY_DN3211_c0_g1_i2.p1	MT8872@@@TRINITY_DN9533_c0_g2_i1.p1	K08B4.1a,K08B4.1b,K08B4.1c,K08B4.1d	cbrenneri@@@TRINITY_DN662_c0_g2_i2.p1	cbriggsae@@@TRINITY_DN1642_c0_g2_i1.p1	celegans@@@TRINITY_DN1889_c0_g1_i1.p1	celegans@@@TRINITY_GG_4081_c0_g1_i1.p1	cinopinata@@@TRINITY_DN2445_c0_g1_i2.p1,cinopinata@@@TRINITY_DN2445_c0_g1_i1.p1	cjaponica@@@TRINITY_DN2561_c0_g1_i1.p1,cjaponica@@@TRINITY_DN2561_c0_g1_i3.p1,cjaponica@@@TRINITY_DN2561_c0_g1_i4.p1	cremanei@@@TRINITY_DN2957_c0_g1_i3.p1,cremanei@@@TRINITY_DN2957_c0_g1_i1.p1,cremanei@@@TRINITY_DN2957_c0_g1_i2.p1	ppacificus@@@TRINITY_DN3055_c1_g2_i1.p1
175	14	29	0.248	CEW1@@@TRINITY_DN14752_c0_g1_i1.p1	DF5006@@@TRINITY_DN13315_c0_g1_i1.p1	DF5012@@@TRINITY_DN10367_c0_g1_i1.p1	DF5112@@@TRINITY_DN487_c0_g1_i1.p1,DF5112@@@TRINITY_DN487_c0_g1_i2.p1	MT8872@@@TRINITY_DN10935_c0_g1_i1.p1,MT8872@@@TRINITY_DN6098_c0_g1_i1.p1	W06B3.2a,W06B3.2b,W06B3.2c,W06B3.2d	cbrenneri@@@TRINITY_DN3082_c0_g1_i1.p1,cbrenneri@@@TRINITY_DN3082_c0_g1_i2.p1	cbriggsae@@@TRINITY_DN322_c0_g1_i1.p1,cbriggsae@@@TRINITY_DN322_c0_g1_i2.p1	celegans@@@TRINITY_DN574_c0_g1_i1.p1,celegans@@@TRINITY_DN574_c0_g1_i3.p1	celegans@@@TRINITY_GG_16272_c0_g1_i1.p1,celegans@@@TRINITY_GG_16272_c0_g1_i2.p1	cinopinata@@@TRINITY_DN1324_c0_g1_i1.p1,cinopinata@@@TRINITY_DN1324_c0_g1_i2.p1,cinopinata@@@TRINITY_DN1324_c0_g1_i3.p1	cjaponica@@@TRINITY_DN2663_c0_g1_i2.p1,cjaponica@@@TRINITY_DN2663_c0_g1_i1.p1	cremanei@@@TRINITY_DN1703_c0_g1_i1.p1,cremanei@@@TRINITY_DN1703_c0_g1_i2.p1,cremanei@@@TRINITY_DN1703_c0_g1_i3.p1	ppacificus@@@TRINITY_DN1859_c0_g1_i1.p1,ppacificus@@@TRINITY_DN1859_c0_g1_i2.p1
176	14	29	0.234	CEW1@@@TRINITY_DN438_c0_g1_i1.p1,CEW1@@@TRINITY_DN438_c0_g1_i2.p1	DF5006@@@TRINITY_DN586_c0_g1_i1.p1,DF5006@@@TRINITY_DN586_c0_g1_i2.p1	DF5012@@@TRINITY_DN2681_c0_g1_i1.p1	DF5112@@@TRINITY_DN211_c0_g3_i6.p1,DF5112@@@TRINITY_DN211_c0_g3_i2.p1	MT8872@@@TRINITY_DN16805_c0_g1_i1.p1	B0361.5a,B0361.5b	cbrenneri@@@TRINITY_DN996_c0_g1_i2.p1,cbrenneri@@@TRINITY_DN996_c0_g1_i1.p1	cbriggsae@@@TRINITY_DN2509_c0_g1_i10.p1,cbriggsae@@@TRINITY_DN2509_c0_g1_i4.p1	celegans@@@TRINITY_DN720_c0_g1_i1.p1,celegans@@@TRINITY_DN720_c0_g1_i2.p1	celegans@@@TRINITY_GG_20264_c0_g1_i1.p1	cinopinata@@@TRINITY_DN580_c0_g1_i2.p1,cinopinata@@@TRINITY_DN580_c0_g1_i1.p1	cjaponica@@@TRINITY_DN1312_c0_g1_i2.p1,cjaponica@@@TRINITY_DN1312_c0_g1_i5.p1	cremanei@@@TRINITY_DN1078_c0_g1_i2.p1,cremanei@@@TRINITY_DN1078_c0_g1_i5.p1,cremanei@@@TRINITY_DN1078_c0_g1_i7.p1,cremanei@@@TRINITY_DN1078_c0_g1_i9.p1,cremanei@@@TRINITY_DN1078_c0_g1_i1.p1,cremanei@@@TRINITY_DN1078_c0_g1_i10.p1,cremanei@@@TRINITY_DN1078_c0_g1_i4.p1	ppacificus@@@TRINITY_DN9248_c0_g2_i2.p1
177	14	29	0.221	CEW1@@@TRINITY_DN1644_c0_g1_i1.p1	DF5006@@@TRINITY_DN12345_c0_g1_i1.p1	DF5012@@@TRINITY_DN1426_c0_g1_i1.p1	DF5112@@@TRINITY_DN982_c0_g1_i1.p1	MT8872@@@TRINITY_DN19322_c0_g1_i1.p1,MT8872@@@TRINITY_DN1187_c0_g1_i2.p2	Y73B6BL.6a,Y73B6BL.6b	cbrenneri@@@TRINITY_DN15129_c0_g1_i1.p2,cbrenneri@@@TRINITY_DN15129_c0_g1_i2.p1,cbrenneri@@@TRINITY_DN15129_c0_g1_i4.p1,cbrenneri@@@TRINITY_DN15129_c0_g1_i5.p2,cbrenneri@@@TRINITY_DN15129_c0_g1_i6.p2,cbrenneri@@@TRINITY_DN15129_c0_g1_i7.p2	cbriggsae@@@TRINITY_DN1484_c0_g1_i1.p1	celegans@@@TRINITY_DN1038_c1_g1_i1.p2,celegans@@@TRINITY_DN1038_c1_g1_i2.p1,celegans@@@TRINITY_DN1038_c1_g1_i3.p2	celegans@@@TRINITY_GG_14339_c0_g1_i1.p1,celegans@@@TRINITY_GG_14339_c0_g1_i2.p1,celegans@@@TRINITY_GG_4057_c0_g1_i1.p1	cinopinata@@@TRINITY_DN2281_c0_g1_i1.p1	cjaponica@@@TRINITY_DN11585_c0_g1_i1.p1	cremanei@@@TRINITY_DN1339_c0_g1_i1.p2,cremanei@@@TRINITY_DN1339_c0_g1_i3.p1,cremanei@@@TRINITY_DN1339_c0_g1_i4.p1,cremanei@@@TRINITY_DN1339_c0_g1_i8.p1,cremanei@@@TRINITY_DN1339_c0_g1_i5.p1	ppacificus@@@TRINITY_DN1173_c0_g1_i2.p2
178	14	29	0.186	CEW1@@@TRINITY_DN452_c0_g1_i1.p1,CEW1@@@TRINITY_DN452_c0_g1_i3.p1,CEW1@@@TRINITY_DN452_c0_g1_i4.p1	DF5006@@@TRINITY_DN5392_c0_g1_i1.p1,DF5006@@@TRINITY_DN5392_c0_g1_i2.p1,DF5006@@@TRINITY_DN5392_c0_g1_i3.p1	DF5012@@@TRINITY_DN673_c0_g1_i3.p1,DF5012@@@TRINITY_DN673_c0_g1_i1.p1,DF5012@@@TRINITY_DN673_c0_g1_i2.p1,DF5012@@@TRINITY_DN673_c0_g1_i4.p1	DF5112@@@TRINITY_DN186_c0_g1_i3.p1,DF5112@@@TRINITY_DN186_c0_g1_i1.p1,DF5112@@@TRINITY_DN186_c0_g1_i2.p1	MT8872@@@TRINITY_DN19158_c0_g1_i1.p1	T13C2.6a,T13C2.6b	cbrenneri@@@TRINITY_DN4549_c0_g1_i1.p1	cbriggsae@@@TRINITY_DN781_c0_g1_i1.p1	celegans@@@TRINITY_DN2325_c0_g1_i1.p1	celegans@@@TRINITY_GG_987_c0_g1_i1.p1	cinopinata@@@TRINITY_DN7918_c0_g1_i1.p1	cjaponica@@@TRINITY_DN1835_c2_g1_i1.p1,cjaponica@@@TRINITY_DN1835_c2_g1_i2.p1,cjaponica@@@TRINITY_DN1835_c2_g1_i3.p1	cremanei@@@TRINITY_DN15115_c0_g1_i1.p1,cremanei@@@TRINITY_DN15115_c0_g1_i3.p1	ppacificus@@@TRINITY_DN2133_c0_g1_i2.p1,ppacificus@@@TRINITY_DN2133_c0_g1_i3.p1,ppacificus@@@TRINITY_DN2133_c0_g1_i1.p1
179	14	29	0.126	CEW1@@@TRINITY_DN4839_c0_g1_i1.p1,CEW1@@@TRINITY_DN4839_c0_g1_i2.p1,CEW1@@@TRINITY_DN4839_c0_g1_i3.p1	DF5006@@@TRINITY_DN5121_c0_g1_i1.p1	DF5012@@@TRINITY_DN6124_c0_g1_i1.p1	DF5112@@@TRINITY_DN3670_c0_g1_i1.p1	MT8872@@@TRINITY_DN17605_c0_g1_i1.p1	Y59A8B.14a,Y59A8B.14c,Y59A8B.14b	cbrenneri@@@TRINITY_DN9750_c0_g1_i1.p1,cbrenneri@@@TRINITY_DN9750_c0_g1_i2.p1,cbrenneri@@@TRINITY_DN9750_c0_g1_i3.p1,cbrenneri@@@TRINITY_DN9750_c0_g1_i4.p1	cbriggsae@@@TRINITY_DN2094_c0_g1_i1.p1,cbriggsae@@@TRINITY_DN2094_c0_g1_i2.p1	celegans@@@TRINITY_DN2431_c0_g1_i6.p1,celegans@@@TRINITY_DN2431_c0_g1_i3.p1	celegans@@@TRINITY_GG_5778_c1_g1_i1.p1,celegans@@@TRINITY_GG_5778_c1_g1_i3.p1	cinopinata@@@TRINITY_DN1738_c0_g1_i3.p1,cinopinata@@@TRINITY_DN1738_c0_g1_i2.p1	cjaponica@@@TRINITY_DN3827_c0_g2_i1.p1	cremanei@@@TRINITY_DN3724_c0_g1_i2.p1,cremanei@@@TRINITY_DN3724_c0_g1_i5.p1,cremanei@@@TRINITY_DN3724_c0_g1_i1.p1,cremanei@@@TRINITY_DN3724_c0_g1_i4.p1	ppacificus@@@TRINITY_DN1206_c0_g1_i1.p1,ppacificus@@@TRINITY_DN1206_c0_g1_i2.p1
180	14	29	0.115	CEW1@@@TRINITY_DN3759_c0_g1_i1.p1	DF5006@@@TRINITY_DN5998_c0_g1_i1.p1,DF5006@@@TRINITY_DN5998_c0_g1_i3.p1,DF5006@@@TRINITY_DN5998_c0_g1_i2.p1,DF5006@@@TRINITY_DN5998_c0_g1_i4.p1,DF5006@@@TRINITY_DN5998_c0_g1_i6.p1	DF5012@@@TRINITY_DN983_c0_g1_i1.p1,DF5012@@@TRINITY_DN983_c0_g1_i3.p1	DF5112@@@TRINITY_DN347_c0_g1_i3.p1,DF5112@@@TRINITY_DN347_c0_g1_i1.p1	MT8872@@@TRINITY_DN16075_c0_g1_i1.p1	F15E6.2a,F15E6.2b	cbrenneri@@@TRINITY_DN5617_c0_g1_i4.p1,cbrenneri@@@TRINITY_DN5617_c0_g1_i2.p1	cbriggsae@@@TRINITY_DN3576_c0_g1_i1.p1,cbriggsae@@@TRINITY_DN3576_c0_g1_i3.p1	celegans@@@TRINITY_DN1356_c0_g1_i3.p1,celegans@@@TRINITY_DN1356_c0_g1_i2.p1	celegans@@@TRINITY_GG_3941_c0_g1_i2.p1,celegans@@@TRINITY_GG_3941_c0_g1_i3.p1	cinopinata@@@TRINITY_DN1411_c0_g1_i1.p1,cinopinata@@@TRINITY_DN1411_c0_g1_i3.p1	cjaponica@@@TRINITY_DN1399_c0_g1_i2.p1,cjaponica@@@TRINITY_DN1399_c0_g1_i3.p1	cremanei@@@TRINITY_DN515_c0_g1_i3.p1,cremanei@@@TRINITY_DN515_c0_g1_i1.p1	ppacificus@@@TRINITY_DN7964_c0_g1_i2.p1,ppacificus@@@TRINITY_DN7964_c0_g1_i3.p1
181	14	29	0.103	CEW1@@@TRINITY_DN2279_c0_g1_i2.p1,CEW1@@@TRINITY_DN2279_c0_g1_i3.p1	DF5006@@@TRINITY_DN7596_c0_g2_i1.p1	DF5012@@@TRINITY_DN3547_c0_g1_i2.p1,DF5012@@@TRINITY_DN3547_c0_g1_i3.p1	DF5112@@@TRINITY_DN1102_c0_g1_i2.p1,DF5112@@@TRINITY_DN1102_c0_g1_i3.p1	MT8872@@@TRINITY_DN18829_c0_g1_i1.p1	C17C3.1b,C17C3.1a,C17C3.1e	cbrenneri@@@TRINITY_DN5355_c0_g1_i1.p1,cbrenneri@@@TRINITY_DN5355_c0_g1_i2.p1	cbriggsae@@@TRINITY_DN986_c0_g1_i1.p1,cbriggsae@@@TRINITY_DN986_c0_g1_i2.p1	celegans@@@TRINITY_DN695_c0_g1_i3.p1,celegans@@@TRINITY_DN695_c0_g1_i7.p1,celegans@@@TRINITY_DN695_c0_g1_i8.p1,celegans@@@TRINITY_DN695_c0_g1_i9.p1,celegans@@@TRINITY_DN695_c0_g1_i5.p1,celegans@@@TRINITY_DN695_c0_g1_i6.p1	celegans@@@TRINITY_GG_2061_c0_g1_i1.p1,celegans@@@TRINITY_GG_2061_c0_g1_i2.p1	cinopinata@@@TRINITY_DN12057_c0_g1_i1.p1	cjaponica@@@TRINITY_DN10101_c0_g1_i2.p1	cremanei@@@TRINITY_DN4039_c0_g1_i2.p1,cremanei@@@TRINITY_DN4039_c0_g1_i1.p1	ppacificus@@@TRINITY_DN1248_c0_g2_i2.p1,ppacificus@@@TRINITY_DN16513_c0_g1_i1.p1
182	14	28	0.675	CEW1@@@TRINITY_DN473_c0_g1_i1.p1,CEW1@@@TRINITY_DN473_c0_g1_i3.p1,CEW1@@@TRINITY_DN473_c0_g1_i5.p1	DF5006@@@TRINITY_DN654_c0_g1_i1.p1,DF5006@@@TRINITY_DN654_c0_g1_i2.p1	DF5012@@@TRINITY_DN3495_c1_g1_i1.p1,DF5012@@@TRINITY_DN3495_c1_g1_i3.p1	DF5112@@@TRINITY_DN554_c0_g1_i1.p1,DF5112@@@TRINITY_DN554_c0_g1_i2.p1	MT8872@@@TRINITY_DN8551_c0_g1_i1.p1	T12A2.15	cbrenneri@@@TRINITY_DN3992_c0_g1_i1.p1,cbrenneri@@@TRINITY_DN3992_c0_g1_i3.p1,cbrenneri@@@TRINITY_DN3992_c0_g1_i4.p1	cbriggsae@@@TRINITY_DN4163_c0_g1_i1.p1	celegans@@@TRINITY_DN273_c0_g1_i1.p1,celegans@@@TRINITY_DN273_c0_g1_i2.p1,celegans@@@TRINITY_DN273_c0_g1_i3.p1	celegans@@@TRINITY_GG_20758_c0_g1_i1.p1	cinopinata@@@TRINITY_DN922_c0_g1_i2.p1,cinopinata@@@TRINITY_DN922_c0_g1_i4.p1	cjaponica@@@TRINITY_DN6377_c0_g1_i2.p1,cjaponica@@@TRINITY_DN6377_c0_g1_i3.p1	cremanei@@@TRINITY_DN2544_c0_g1_i5.p1,cremanei@@@TRINITY_DN2544_c0_g1_i7.p1,cremanei@@@TRINITY_DN2544_c0_g1_i9.p1	ppacificus@@@TRINITY_DN738_c0_g1_i1.p1,ppacificus@@@TRINITY_DN738_c0_g1_i5.p1
183	14	28	0.553	CEW1@@@TRINITY_DN1320_c0_g1_i1.p1,CEW1@@@TRINITY_DN1320_c0_g1_i2.p1	DF5006@@@TRINITY_DN1369_c0_g3_i2.p1,DF5006@@@TRINITY_DN1369_c0_g3_i3.p1	DF5012@@@TRINITY_DN3873_c0_g1_i1.p1	DF5112@@@TRINITY_DN5724_c0_g1_i1.p1	MT8872@@@TRINITY_DN463_c0_g1_i1.p1,MT8872@@@TRINITY_DN463_c0_g1_i4.p1	K08B12.5a,K08B12.5b	cbrenneri@@@TRINITY_DN5691_c0_g1_i1.p1,cbrenneri@@@TRINITY_DN5691_c0_g1_i2.p1	cbriggsae@@@TRINITY_DN1023_c0_g1_i2.p1,cbriggsae@@@TRINITY_DN1023_c0_g1_i5.p1	celegans@@@TRINITY_DN1797_c0_g1_i1.p1,celegans@@@TRINITY_DN1797_c0_g1_i2.p1	celegans@@@TRINITY_GG_17866_c0_g1_i1.p1,celegans@@@TRINITY_GG_17866_c0_g1_i2.p1	cinopinata@@@TRINITY_DN9172_c0_g1_i6.p1	cjaponica@@@TRINITY_DN3476_c0_g1_i1.p1,cjaponica@@@TRINITY_DN3476_c0_g1_i2.p1	cremanei@@@TRINITY_DN4798_c0_g1_i1.p1,cremanei@@@TRINITY_DN4798_c0_g1_i10.p1,cremanei@@@TRINITY_DN4798_c0_g1_i3.p1,cremanei@@@TRINITY_DN4798_c0_g1_i5.p1,cremanei@@@TRINITY_DN4798_c0_g1_i9.p1	ppacificus@@@TRINITY_DN4382_c0_g1_i3.p1,ppacificus@@@TRINITY_DN4382_c0_g1_i5.p1
184	14	28	0.491	CEW1@@@TRINITY_DN1999_c0_g1_i1.p1,CEW1@@@TRINITY_DN1999_c0_g1_i2.p1	DF5006@@@TRINITY_DN608_c0_g1_i2.p1,DF5006@@@TRINITY_DN608_c0_g1_i3.p1,DF5006@@@TRINITY_DN608_c0_g1_i4.p1	DF5012@@@TRINITY_DN3125_c0_g1_i1.p1	DF5112@@@TRINITY_DN2127_c0_g1_i1.p1,DF5112@@@TRINITY_DN2127_c0_g1_i2.p1	MT8872@@@TRINITY_DN2490_c0_g1_i1.p1	T14D7.1	cbrenneri@@@TRINITY_DN4818_c0_g1_i1.p1,cbrenneri@@@TRINITY_DN4818_c0_g1_i3.p1	cbriggsae@@@TRINITY_DN761_c0_g1_i2.p1,cbriggsae@@@TRINITY_DN761_c0_g1_i5.p1,cbriggsae@@@TRINITY_DN761_c0_g1_i4.p1	celegans@@@TRINITY_DN1255_c0_g1_i2.p1	celegans@@@TRINITY_GG_882_c0_g1_i1.p1,celegans@@@TRINITY_GG_882_c0_g1_i2.p1	cinopinata@@@TRINITY_DN2063_c0_g1_i3.p1,cinopinata@@@TRINITY_DN2063_c0_g1_i4.p1,cinopinata@@@TRINITY_DN2063_c0_g1_i1.p1	cjaponica@@@TRINITY_DN398_c0_g1_i1.p1,cjaponica@@@TRINITY_DN398_c0_g1_i2.p1,cjaponica@@@TRINITY_DN398_c0_g1_i3.p1,cjaponica@@@TRINITY_DN398_c0_g1_i4.p1	cremanei@@@TRINITY_DN7976_c0_g1_i4.p1,cremanei@@@TRINITY_DN7976_c0_g1_i6.p1	ppacificus@@@TRINITY_DN6052_c0_g1_i1.p1
185	14	28	0.485	CEW1@@@TRINITY_DN241_c0_g1_i3.p1,CEW1@@@TRINITY_DN241_c0_g1_i4.p1	DF5006@@@TRINITY_DN4437_c0_g5_i2.p1,DF5006@@@TRINITY_DN4437_c0_g5_i3.p1	DF5012@@@TRINITY_DN478_c0_g1_i1.p1,DF5012@@@TRINITY_DN478_c0_g1_i2.p1	DF5112@@@TRINITY_DN206_c0_g2_i2.p1,DF5112@@@TRINITY_DN206_c0_g2_i1.p1	MT8872@@@TRINITY_DN292_c0_g1_i1.p1,MT8872@@@TRINITY_DN292_c0_g1_i2.p1	F59A3.4	cbrenneri@@@TRINITY_DN1056_c0_g1_i2.p1,cbrenneri@@@TRINITY_DN1056_c0_g1_i1.p1	cbriggsae@@@TRINITY_DN254_c0_g1_i1.p1,cbriggsae@@@TRINITY_DN254_c0_g1_i2.p1	celegans@@@TRINITY_DN601_c0_g1_i2.p1,celegans@@@TRINITY_DN601_c0_g1_i1.p1	celegans@@@TRINITY_GG_21883_c0_g1_i1.p1,celegans@@@TRINITY_GG_21883_c0_g1_i2.p1	cinopinata@@@TRINITY_DN614_c0_g2_i1.p1,cinopinata@@@TRINITY_DN614_c0_g2_i2.p1	cjaponica@@@TRINITY_DN236_c0_g1_i3.p1,cjaponica@@@TRINITY_DN236_c0_g1_i2.p1,cjaponica@@@TRINITY_DN236_c0_g1_i1.p1	cremanei@@@TRINITY_DN1292_c0_g1_i1.p1,cremanei@@@TRINITY_DN1292_c0_g1_i2.p1	ppacificus@@@TRINITY_DN1151_c0_g1_i2.p1,ppacificus@@@TRINITY_DN1151_c0_g1_i3.p1
186	14	28	0.447	CEW1@@@TRINITY_DN1841_c0_g2_i2.p1,CEW1@@@TRINITY_DN1841_c0_g2_i3.p1,CEW1@@@TRINITY_DN1841_c0_g2_i1.p1	DF5006@@@TRINITY_DN4277_c0_g1_i1.p1,DF5006@@@TRINITY_DN4277_c0_g1_i2.p1	DF5012@@@TRINITY_DN5077_c0_g1_i3.p1	DF5112@@@TRINITY_DN1724_c0_g1_i1.p1,DF5112@@@TRINITY_DN1724_c0_g1_i2.p1	MT8872@@@TRINITY_DN8026_c0_g1_i2.p1,MT8872@@@TRINITY_DN8026_c0_g1_i5.p1,MT8872@@@TRINITY_DN8026_c0_g1_i1.p1,MT8872@@@TRINITY_DN8026_c0_g1_i4.p1	C02C6.2a,C02C6.2b	cbrenneri@@@TRINITY_DN3678_c0_g1_i1.p1,cbrenneri@@@TRINITY_DN3678_c0_g1_i2.p1	cbriggsae@@@TRINITY_DN1984_c0_g1_i1.p1,cbriggsae@@@TRINITY_DN1984_c0_g1_i2.p1	celegans@@@TRINITY_DN1379_c0_g1_i1.p1,celegans@@@TRINITY_DN1379_c0_g1_i2.p1	celegans@@@TRINITY_GG_4398_c0_g1_i1.p1	cinopinata@@@TRINITY_DN6869_c0_g1_i1.p1,cinopinata@@@TRINITY_DN6869_c0_g1_i2.p1	cjaponica@@@TRINITY_DN2420_c0_g1_i1.p1,cjaponica@@@TRINITY_DN2420_c0_g1_i2.p1	cremanei@@@TRINITY_DN3679_c0_g1_i3.p1,cremanei@@@TRINITY_DN3679_c0_g1_i1.p1	ppacificus@@@TRINITY_DN2679_c0_g1_i1.p1
187	14	28	0.423	CEW1@@@TRINITY_DN1284_c0_g1_i1.p1,CEW1@@@TRINITY_DN1284_c0_g1_i2.p1,CEW1@@@TRINITY_DN1284_c0_g1_i3.p1,CEW1@@@TRINITY_DN1284_c0_g1_i4.p1	DF5006@@@TRINITY_DN42_c0_g3_i1.p1,DF5006@@@TRINITY_DN42_c0_g3_i2.p1,DF5006@@@TRINITY_DN42_c0_g3_i3.p1	DF5012@@@TRINITY_DN3586_c0_g2_i1.p1,DF5012@@@TRINITY_DN3586_c0_g2_i2.p1	DF5112@@@TRINITY_DN975_c0_g1_i6.p1	MT8872@@@TRINITY_DN4381_c0_g1_i1.p1,MT8872@@@TRINITY_DN4381_c0_g1_i2.p1	F56E3.3a,F56E3.3b	cbrenneri@@@TRINITY_DN10909_c0_g1_i3.p1,cbrenneri@@@TRINITY_DN10909_c0_g1_i1.p1	cbriggsae@@@TRINITY_DN2950_c0_g1_i1.p1,cbriggsae@@@TRINITY_DN2950_c0_g1_i3.p1	celegans@@@TRINITY_DN2037_c0_g1_i2.p1	celegans@@@TRINITY_GG_17228_c0_g1_i2.p1	cinopinata@@@TRINITY_DN7029_c0_g1_i3.p1,cinopinata@@@TRINITY_DN7029_c0_g1_i1.p1	cjaponica@@@TRINITY_DN2600_c0_g1_i1.p1,cjaponica@@@TRINITY_DN2600_c0_g1_i4.p1,cjaponica@@@TRINITY_DN2600_c0_g1_i3.p1	cremanei@@@TRINITY_DN5018_c0_g1_i1.p1,cremanei@@@TRINITY_DN5018_c0_g1_i4.p1	ppacificus@@@TRINITY_DN9319_c0_g3_i1.p1
188	14	28	0.413	CEW1@@@TRINITY_DN3247_c0_g1_i1.p1,CEW1@@@TRINITY_DN3247_c0_g1_i3.p1,CEW1@@@TRINITY_DN3247_c0_g1_i6.p1,CEW1@@@TRINITY_DN3247_c0_g1_i7.p1	DF5006@@@TRINITY_DN2013_c0_g1_i1.p1	DF5012@@@TRINITY_DN2165_c0_g1_i1.p1,DF5012@@@TRINITY_DN2165_c0_g1_i2.p1	DF5112@@@TRINITY_DN2030_c0_g1_i5.p1,DF5112@@@TRINITY_DN2030_c0_g1_i1.p1	MT8872@@@TRINITY_DN1165_c0_g1_i1.p1,MT8872@@@TRINITY_DN1165_c0_g1_i3.p1,MT8872@@@TRINITY_DN1165_c0_g1_i4.p1	T28B4.1b,T28B4.1a	cbrenneri@@@TRINITY_DN5978_c0_g2_i2.p1,cbrenneri@@@TRINITY_DN5978_c0_g2_i1.p1	cbriggsae@@@TRINITY_DN521_c0_g1_i1.p1,cbriggsae@@@TRINITY_DN521_c0_g1_i3.p1	celegans@@@TRINITY_DN854_c0_g2_i2.p1,celegans@@@TRINITY_DN854_c0_g2_i3.p1	celegans@@@TRINITY_GG_5323_c0_g1_i2.p1	cinopinata@@@TRINITY_DN2813_c0_g1_i1.p1,cinopinata@@@TRINITY_DN2813_c0_g1_i2.p1	cjaponica@@@TRINITY_DN1037_c0_g1_i1.p1,cjaponica@@@TRINITY_DN1037_c0_g1_i4.p1	cremanei@@@TRINITY_DN4237_c0_g2_i1.p1,cremanei@@@TRINITY_DN4237_c0_g2_i2.p1	ppacificus@@@TRINITY_DN2165_c0_g1_i1.p1
189	14	28	0.346	CEW1@@@TRINITY_DN3887_c0_g1_i2.p1	DF5006@@@TRINITY_DN3137_c0_g1_i1.p1	DF5012@@@TRINITY_DN2183_c0_g1_i1.p1,DF5012@@@TRINITY_DN2183_c0_g1_i3.p1,DF5012@@@TRINITY_DN2183_c0_g1_i4.p1,DF5012@@@TRINITY_DN2183_c0_g1_i6.p1	DF5112@@@TRINITY_DN473_c0_g1_i1.p1,DF5112@@@TRINITY_DN473_c0_g1_i2.p1	MT8872@@@TRINITY_DN6476_c0_g1_i1.p1	T01H8.5d,T01H8.5a,T01H8.5c	cbrenneri@@@TRINITY_DN2261_c0_g1_i1.p1,cbrenneri@@@TRINITY_DN2261_c0_g1_i2.p1	cbriggsae@@@TRINITY_DN2466_c0_g1_i2.p1,cbriggsae@@@TRINITY_DN2466_c0_g1_i1.p1	celegans@@@TRINITY_DN1381_c0_g1_i2.p1,celegans@@@TRINITY_DN1381_c0_g1_i3.p1,celegans@@@TRINITY_DN1381_c0_g1_i1.p1	celegans@@@TRINITY_GG_22347_c0_g1_i1.p1	cinopinata@@@TRINITY_DN13687_c0_g1_i1.p1,cinopinata@@@TRINITY_DN13687_c0_g1_i5.p1	cjaponica@@@TRINITY_DN1632_c0_g3_i1.p1,cjaponica@@@TRINITY_DN1632_c0_g3_i3.p1	cremanei@@@TRINITY_DN2868_c0_g1_i2.p1,cremanei@@@TRINITY_DN2868_c0_g1_i3.p1,cremanei@@@TRINITY_DN2868_c0_g1_i6.p1	ppacificus@@@TRINITY_DN6966_c0_g1_i1.p1
190	14	28	0.314	CEW1@@@TRINITY_DN854_c0_g1_i1.p1,CEW1@@@TRINITY_DN854_c0_g1_i2.p1	DF5006@@@TRINITY_DN1108_c0_g1_i2.p1,DF5006@@@TRINITY_DN1108_c0_g1_i1.p1	DF5012@@@TRINITY_DN590_c0_g1_i1.p1,DF5012@@@TRINITY_DN590_c0_g1_i3.p1	DF5112@@@TRINITY_DN401_c0_g1_i3.p1,DF5112@@@TRINITY_DN401_c0_g1_i1.p1	MT8872@@@TRINITY_DN6617_c0_g1_i1.p1	F57C9.1b,F57C9.1c,F57C9.1a	cbrenneri@@@TRINITY_DN1721_c0_g1_i3.p1,cbrenneri@@@TRINITY_DN1721_c0_g1_i2.p1	cbriggsae@@@TRINITY_DN969_c0_g1_i2.p1,cbriggsae@@@TRINITY_DN969_c0_g1_i3.p1	celegans@@@TRINITY_DN1219_c0_g1_i1.p1,celegans@@@TRINITY_DN1219_c0_g1_i2.p1	celegans@@@TRINITY_GG_11021_c0_g1_i1.p1,celegans@@@TRINITY_GG_11021_c0_g1_i2.p1	cinopinata@@@TRINITY_DN3917_c0_g1_i1.p1,cinopinata@@@TRINITY_DN3917_c0_g1_i2.p1	cjaponica@@@TRINITY_DN642_c0_g1_i2.p1,cjaponica@@@TRINITY_DN642_c0_g1_i3.p1	cremanei@@@TRINITY_DN2679_c0_g1_i2.p1,cremanei@@@TRINITY_DN2679_c0_g1_i4.p1,cremanei@@@TRINITY_DN2679_c0_g1_i1.p1	ppacificus@@@TRINITY_DN1523_c0_g1_i1.p1
191	14	28	0.277	CEW1@@@TRINITY_DN4434_c0_g2_i2.p1,CEW1@@@TRINITY_DN4434_c0_g3_i1.p1	DF5006@@@TRINITY_DN2915_c0_g1_i1.p1	DF5012@@@TRINITY_DN1664_c0_g1_i1.p1,DF5012@@@TRINITY_DN1664_c0_g1_i2.p1	DF5112@@@TRINITY_DN877_c0_g1_i1.p1	MT8872@@@TRINITY_DN3215_c0_g2_i1.p1,MT8872@@@TRINITY_DN3215_c0_g2_i2.p1,MT8872@@@TRINITY_DN3215_c0_g1_i5.p1,MT8872@@@TRINITY_DN3215_c0_g1_i3.p1,MT8872@@@TRINITY_DN3215_c0_g1_i4.p1,MT8872@@@TRINITY_DN3215_c0_g1_i1.p1	C37C3.2	cbrenneri@@@TRINITY_DN3644_c0_g2_i1.p1,cbrenneri@@@TRINITY_DN3644_c0_g2_i2.p1	cbriggsae@@@TRINITY_DN240_c0_g1_i1.p1,cbriggsae@@@TRINITY_DN240_c0_g1_i2.p1	celegans@@@TRINITY_DN2987_c0_g1_i1.p1	celegans@@@TRINITY_GG_7328_c0_g1_i1.p1	cinopinata@@@TRINITY_DN1630_c0_g1_i1.p1,cinopinata@@@TRINITY_DN1630_c0_g1_i2.p1,cinopinata@@@TRINITY_DN1630_c0_g1_i3.p1	cjaponica@@@TRINITY_DN263_c0_g1_i1.p1,cjaponica@@@TRINITY_DN263_c0_g1_i4.p1	cremanei@@@TRINITY_DN2048_c0_g2_i1.p1,cremanei@@@TRINITY_DN2048_c0_g2_i2.p1	ppacificus@@@TRINITY_DN4938_c0_g2_i1.p1,ppacificus@@@TRINITY_DN4938_c0_g2_i2.p1
192	14	28	0.261	CEW1@@@TRINITY_DN6229_c0_g1_i1.p1	DF5006@@@TRINITY_DN1870_c0_g1_i2.p2	DF5012@@@TRINITY_DN2018_c0_g1_i1.p1,DF5012@@@TRINITY_DN2018_c0_g1_i2.p1	DF5112@@@TRINITY_DN564_c1_g8_i1.p1	MT8872@@@TRINITY_DN2487_c0_g1_i5.p1	T23F11.1	cbrenneri@@@TRINITY_DN2482_c0_g1_i1.p1,cbrenneri@@@TRINITY_DN2482_c0_g1_i2.p1,cbrenneri@@@TRINITY_DN2482_c0_g1_i3.p1	cbriggsae@@@TRINITY_DN2060_c0_g1_i2.p1,cbriggsae@@@TRINITY_DN2060_c0_g1_i3.p1,cbriggsae@@@TRINITY_DN2060_c0_g1_i5.p1	celegans@@@TRINITY_DN1566_c0_g1_i3.p1,celegans@@@TRINITY_DN1566_c0_g1_i2.p1	celegans@@@TRINITY_GG_8346_c0_g1_i3.p1,celegans@@@TRINITY_GG_8346_c0_g1_i4.p1,celegans@@@TRINITY_GG_21128_c0_g1_i1.p1,celegans@@@TRINITY_GG_8346_c0_g1_i1.p1	cinopinata@@@TRINITY_DN860_c0_g1_i1.p1,cinopinata@@@TRINITY_DN860_c0_g1_i2.p1,cinopinata@@@TRINITY_DN860_c0_g1_i3.p1,cinopinata@@@TRINITY_DN860_c0_g1_i4.p1	cjaponica@@@TRINITY_DN913_c0_g2_i2.p1,cjaponica@@@TRINITY_DN913_c0_g2_i1.p1	cremanei@@@TRINITY_DN6539_c0_g1_i2.p1,cremanei@@@TRINITY_DN6539_c0_g1_i1.p1	ppacificus@@@TRINITY_DN2244_c0_g1_i1.p1
193	14	28	0.25	CEW1@@@TRINITY_DN1449_c0_g1_i5.p1	DF5006@@@TRINITY_DN2607_c0_g1_i1.p1,DF5006@@@TRINITY_DN2607_c0_g1_i2.p1,DF5006@@@TRINITY_DN2607_c0_g1_i3.p1	DF5012@@@TRINITY_DN7432_c0_g1_i1.p1	DF5112@@@TRINITY_DN2500_c0_g1_i1.p1,DF5112@@@TRINITY_DN2500_c0_g1_i2.p1,DF5112@@@TRINITY_DN2500_c0_g1_i3.p1	MT8872@@@TRINITY_DN854_c0_g1_i1.p1,MT8872@@@TRINITY_DN854_c0_g1_i2.p1,MT8872@@@TRINITY_DN854_c0_g1_i3.p1	C53D5.1a,C53D5.1b,C53D5.1d,C53D5.1c	cbrenneri@@@TRINITY_DN1974_c0_g1_i1.p1,cbrenneri@@@TRINITY_DN1974_c0_g1_i2.p1,cbrenneri@@@TRINITY_DN1974_c0_g1_i3.p1	cbriggsae@@@TRINITY_DN3670_c0_g1_i2.p1,cbriggsae@@@TRINITY_DN3670_c0_g1_i1.p1	celegans@@@TRINITY_DN8397_c0_g1_i1.p1	celegans@@@TRINITY_GG_10994_c0_g1_i1.p1	cinopinata@@@TRINITY_DN129_c0_g1_i2.p1	cjaponica@@@TRINITY_DN2701_c0_g1_i3.p1,cjaponica@@@TRINITY_DN2701_c0_g1_i2.p1	cremanei@@@TRINITY_DN171_c1_g1_i1.p1	ppacificus@@@TRINITY_DN8137_c0_g1_i1.p1,ppacificus@@@TRINITY_DN8137_c0_g1_i2.p1
194	14	28	0.238	CEW1@@@TRINITY_DN100_c0_g1_i17.p1,CEW1@@@TRINITY_DN100_c0_g1_i6.p1	DF5006@@@TRINITY_DN225_c0_g1_i1.p1,DF5006@@@TRINITY_DN225_c0_g1_i2.p1	DF5012@@@TRINITY_DN41_c0_g1_i1.p1,DF5012@@@TRINITY_DN41_c0_g1_i6.p1	DF5112@@@TRINITY_DN6761_c0_g2_i7.p1,DF5112@@@TRINITY_DN6761_c0_g2_i2.p1	MT8872@@@TRINITY_DN1948_c0_g1_i3.p1	T28F12.2a,T28F12.2b,T28F12.2g	cbrenneri@@@TRINITY_DN1984_c0_g1_i2.p1,cbrenneri@@@TRINITY_DN1984_c0_g1_i6.p1	cbriggsae@@@TRINITY_DN233_c0_g1_i1.p1,cbriggsae@@@TRINITY_DN233_c0_g1_i2.p1,cbriggsae@@@TRINITY_DN233_c0_g1_i8.p1	celegans@@@TRINITY_DN880_c0_g1_i4.p1,celegans@@@TRINITY_DN880_c0_g1_i1.p1	celegans@@@TRINITY_GG_6158_c0_g1_i4.p1	cinopinata@@@TRINITY_DN17_c0_g1_i1.p1,cinopinata@@@TRINITY_DN17_c0_g1_i3.p1	cjaponica@@@TRINITY_DN1997_c0_g1_i6.p1,cjaponica@@@TRINITY_DN1997_c0_g1_i7.p1	cremanei@@@TRINITY_DN2382_c0_g1_i4.p1,cremanei@@@TRINITY_DN2382_c0_g1_i1.p1	ppacificus@@@TRINITY_DN83_c0_g1_i1.p1,ppacificus@@@TRINITY_DN83_c0_g1_i11.p1
195	14	28	0.236	CEW1@@@TRINITY_DN21_c0_g1_i3.p1,CEW1@@@TRINITY_DN21_c0_g1_i2.p1	DF5006@@@TRINITY_DN665_c0_g2_i3.p1,DF5006@@@TRINITY_DN665_c0_g2_i2.p1,DF5006@@@TRINITY_DN665_c0_g2_i1.p1	DF5012@@@TRINITY_DN1125_c0_g1_i1.p1,DF5012@@@TRINITY_DN1125_c0_g1_i3.p1,DF5012@@@TRINITY_DN1125_c0_g1_i2.p1	DF5112@@@TRINITY_DN240_c0_g1_i2.p1,DF5112@@@TRINITY_DN240_c0_g1_i1.p1	MT8872@@@TRINITY_DN7_c0_g2_i1.p1	F10C1.2a,F10C1.2b	cbrenneri@@@TRINITY_DN113_c0_g1_i1.p1,cbrenneri@@@TRINITY_DN113_c0_g1_i2.p1	cbriggsae@@@TRINITY_DN99_c0_g1_i2.p1,cbriggsae@@@TRINITY_DN99_c0_g1_i1.p1	celegans@@@TRINITY_DN258_c0_g1_i1.p1,celegans@@@TRINITY_DN258_c0_g1_i2.p1	celegans@@@TRINITY_GG_599_c0_g1_i1.p1	cinopinata@@@TRINITY_DN1428_c0_g1_i1.p1,cinopinata@@@TRINITY_DN1428_c0_g1_i2.p1	cjaponica@@@TRINITY_DN747_c0_g1_i1.p1,cjaponica@@@TRINITY_DN747_c0_g1_i2.p1	cremanei@@@TRINITY_DN9178_c0_g1_i1.p1,cremanei@@@TRINITY_DN9178_c0_g1_i2.p1	ppacificus@@@TRINITY_DN458_c0_g1_i1.p1,ppacificus@@@TRINITY_DN458_c0_g1_i2.p1
196	14	28	0.226	CEW1@@@TRINITY_DN1427_c0_g1_i2.p1	DF5006@@@TRINITY_DN3411_c0_g1_i1.p1,DF5006@@@TRINITY_DN3411_c0_g1_i2.p1	DF5012@@@TRINITY_DN3192_c0_g1_i2.p1	DF5112@@@TRINITY_DN2781_c0_g1_i1.p1,DF5112@@@TRINITY_DN2781_c0_g1_i2.p1	MT8872@@@TRINITY_DN2790_c0_g1_i1.p1,MT8872@@@TRINITY_DN2790_c0_g1_i2.p1,MT8872@@@TRINITY_DN2790_c0_g1_i3.p1	Y17G7B.10b,Y17G7B.10a	cbrenneri@@@TRINITY_DN255_c0_g1_i1.p1,cbrenneri@@@TRINITY_DN255_c0_g1_i2.p1	cbriggsae@@@TRINITY_DN342_c0_g1_i2.p1,cbriggsae@@@TRINITY_DN342_c0_g1_i1.p1	celegans@@@TRINITY_DN10311_c0_g1_i3.p1,celegans@@@TRINITY_DN10311_c0_g1_i1.p1,celegans@@@TRINITY_DN10311_c0_g1_i2.p1,celegans@@@TRINITY_DN10311_c0_g1_i5.p1	celegans@@@TRINITY_GG_320_c0_g1_i1.p1	cinopinata@@@TRINITY_DN791_c0_g1_i1.p1,cinopinata@@@TRINITY_DN791_c0_g1_i2.p1	cjaponica@@@TRINITY_DN500_c0_g1_i3.p1,cjaponica@@@TRINITY_DN500_c0_g1_i1.p1,cjaponica@@@TRINITY_DN500_c0_g1_i2.p1	cremanei@@@TRINITY_DN26322_c0_g1_i2.p1,cremanei@@@TRINITY_DN26322_c0_g1_i1.p1	ppacificus@@@TRINITY_DN2884_c0_g1_i1.p1
197	14	28	0.212	CEW1@@@TRINITY_DN1938_c0_g1_i2.p1	DF5006@@@TRINITY_DN1663_c0_g1_i1.p1	DF5012@@@TRINITY_DN522_c0_g1_i2.p1,DF5012@@@TRINITY_DN522_c0_g1_i5.p1,DF5012@@@TRINITY_DN522_c0_g1_i3.p1	DF5112@@@TRINITY_DN343_c2_g1_i2.p1,DF5112@@@TRINITY_DN343_c2_g1_i1.p1	MT8872@@@TRINITY_DN3945_c0_g1_i1.p1,MT8872@@@TRINITY_DN3945_c0_g1_i2.p1	F43H9.2b,F43H9.2a	cbrenneri@@@TRINITY_DN149_c0_g1_i1.p1,cbrenneri@@@TRINITY_DN149_c0_g1_i3.p1	cbriggsae@@@TRINITY_DN1624_c0_g1_i1.p1,cbriggsae@@@TRINITY_DN1624_c0_g1_i2.p1	celegans@@@TRINITY_DN1645_c0_g1_i1.p1,celegans@@@TRINITY_DN1645_c0_g1_i2.p1	celegans@@@TRINITY_GG_6686_c0_g1_i2.p1,celegans@@@TRINITY_GG_6686_c0_g1_i1.p1	cinopinata@@@TRINITY_DN3096_c0_g1_i5.p1,cinopinata@@@TRINITY_DN3096_c0_g1_i1.p1,cinopinata@@@TRINITY_DN3096_c0_g1_i2.p1,cinopinata@@@TRINITY_DN3096_c0_g1_i6.p1	cjaponica@@@TRINITY_DN1424_c0_g1_i2.p1,cjaponica@@@TRINITY_DN1424_c0_g1_i1.p1	cremanei@@@TRINITY_DN207_c0_g1_i1.p1,cremanei@@@TRINITY_DN207_c0_g1_i2.p1	ppacificus@@@TRINITY_DN13194_c0_g5_i1.p1
198	14	28	0.202	CEW1@@@TRINITY_DN2608_c0_g1_i1.p1	DF5006@@@TRINITY_DN1714_c0_g1_i1.p1	DF5012@@@TRINITY_DN1269_c0_g1_i1.p1,DF5012@@@TRINITY_DN1269_c0_g1_i3.p1	DF5112@@@TRINITY_DN1516_c0_g1_i1.p1,DF5112@@@TRINITY_DN1516_c0_g1_i2.p1	MT8872@@@TRINITY_DN8184_c0_g1_i1.p1,MT8872@@@TRINITY_DN8184_c0_g1_i2.p1,MT8872@@@TRINITY_DN2597_c0_g1_i2.p1,MT8872@@@TRINITY_DN2597_c0_g1_i1.p1	Y50E8A.4c,Y50E8A.4a,Y50E8A.4b	cbrenneri@@@TRINITY_DN2499_c0_g1_i1.p1,cbrenneri@@@TRINITY_DN2499_c0_g1_i2.p1	cbriggsae@@@TRINITY_DN937_c0_g1_i1.p1,cbriggsae@@@TRINITY_DN937_c0_g1_i2.p1	celegans@@@TRINITY_DN300_c0_g1_i2.p1,celegans@@@TRINITY_DN300_c0_g1_i1.p1	celegans@@@TRINITY_GG_17680_c0_g1_i2.p1,celegans@@@TRINITY_GG_17680_c0_g1_i1.p1	cinopinata@@@TRINITY_DN2388_c0_g1_i1.p1,cinopinata@@@TRINITY_DN2388_c0_g1_i2.p1	cjaponica@@@TRINITY_DN1783_c0_g1_i1.p1	cremanei@@@TRINITY_DN2546_c0_g1_i1.p1,cremanei@@@TRINITY_DN2546_c0_g1_i2.p1,cremanei@@@TRINITY_DN2546_c0_g1_i5.p1	ppacificus@@@TRINITY_DN27013_c0_g1_i1.p1
199	14	28	0.192	CEW1@@@TRINITY_DN15268_c0_g1_i1.p2	DF5006@@@TRINITY_DN4437_c2_g1_i1.p1	DF5012@@@TRINITY_DN21571_c0_g1_i1.p2	DF5112@@@TRINITY_DN12267_c0_g1_i1.p1	MT8872@@@TRINITY_DN18024_c0_g1_i1.p1	W03D8.9,Y37D8A.5,T16A9.5,Y69E1A.1	cbrenneri@@@TRINITY_DN13042_c0_g1_i1.p1	cbriggsae@@@TRINITY_DN2603_c0_g1_i1.p1,cbriggsae@@@TRINITY_DN2603_c0_g1_i2.p1	celegans@@@TRINITY_DN2108_c0_g1_i1.p1,celegans@@@TRINITY_DN2108_c0_g2_i2.p1,celegans@@@TRINITY_DN3469_c0_g1_i2.p1,celegans@@@TRINITY_DN3469_c0_g1_i1.p1	celegans@@@TRINITY_GG_20315_c0_g1_i1.p1,celegans@@@TRINITY_GG_23140_c0_g1_i1.p1,celegans@@@TRINITY_GG_19090_c0_g1_i1.p1,celegans@@@TRINITY_GG_14570_c0_g1_i1.p1	cinopinata@@@TRINITY_DN4023_c0_g1_i1.p1	cjaponica@@@TRINITY_DN1770_c0_g1_i1.p1	cremanei@@@TRINITY_DN394_c0_g1_i9.p1,cremanei@@@TRINITY_DN394_c0_g1_i7.p1,cremanei@@@TRINITY_DN394_c0_g1_i2.p1,cremanei@@@TRINITY_DN394_c0_g1_i4.p1,cremanei@@@TRINITY_DN394_c0_g1_i8.p1	ppacificus@@@TRINITY_DN26654_c0_g1_i1.p1
200	14	28	0.181	CEW1@@@TRINITY_DN1141_c0_g1_i2.p1	DF5006@@@TRINITY_DN3727_c0_g1_i1.p1	DF5012@@@TRINITY_DN1859_c0_g1_i1.p1,DF5012@@@TRINITY_DN1859_c0_g1_i3.p1	DF5112@@@TRINITY_DN1000_c0_g1_i2.p1,DF5112@@@TRINITY_DN1000_c0_g1_i4.p1,DF5112@@@TRINITY_DN1000_c0_g1_i5.p1	MT8872@@@TRINITY_DN1007_c0_g1_i2.p1,MT8872@@@TRINITY_DN1007_c0_g1_i3.p1	C31H2.1a,C31H2.1b,C31H2.1c	cbrenneri@@@TRINITY_DN21358_c0_g1_i1.p1,cbrenneri@@@TRINITY_DN21358_c0_g1_i2.p1,cbrenneri@@@TRINITY_DN21358_c0_g1_i4.p1	cbriggsae@@@TRINITY_DN4143_c0_g1_i2.p1,cbriggsae@@@TRINITY_DN4143_c0_g1_i1.p1	celegans@@@TRINITY_DN402_c0_g1_i3.p1,celegans@@@TRINITY_DN402_c0_g1_i2.p1	celegans@@@TRINITY_GG_5552_c0_g1_i1.p1,celegans@@@TRINITY_GG_5552_c0_g1_i3.p1	cinopinata@@@TRINITY_DN4494_c0_g1_i2.p1,cinopinata@@@TRINITY_DN4494_c0_g1_i1.p1	cjaponica@@@TRINITY_DN2156_c0_g1_i1.p1	cremanei@@@TRINITY_DN3741_c0_g2_i1.p1,cremanei@@@TRINITY_DN3741_c0_g2_i3.p1	ppacificus@@@TRINITY_DN367_c0_g1_i1.p1,ppacificus@@@TRINITY_DN367_c0_g1_i5.p1
201	14	28	0.172	CEW1@@@TRINITY_DN7054_c0_g1_i1.p1	DF5006@@@TRINITY_DN1992_c0_g2_i1.p1	DF5012@@@TRINITY_DN492_c0_g1_i1.p1,DF5012@@@TRINITY_DN492_c0_g1_i2.p1,DF5012@@@TRINITY_DN7086_c0_g1_i2.p1	DF5112@@@TRINITY_DN6850_c0_g1_i1.p1	MT8872@@@TRINITY_DN20644_c0_g1_i1.p1	T19E10.1a,T19E10.1b	cbrenneri@@@TRINITY_DN1522_c0_g2_i1.p1,cbrenneri@@@TRINITY_DN1522_c0_g2_i2.p1,cbrenneri@@@TRINITY_DN1522_c0_g2_i3.p1,cbrenneri@@@TRINITY_DN1522_c0_g2_i4.p1	cbriggsae@@@TRINITY_DN1534_c0_g1_i1.p1,cbriggsae@@@TRINITY_DN1534_c0_g1_i2.p1	celegans@@@TRINITY_DN526_c0_g2_i1.p1,celegans@@@TRINITY_DN526_c0_g2_i2.p1	celegans@@@TRINITY_GG_12913_c0_g1_i1.p1,celegans@@@TRINITY_GG_12913_c0_g1_i2.p1	cinopinata@@@TRINITY_DN1589_c0_g1_i1.p1,cinopinata@@@TRINITY_DN1589_c0_g1_i2.p1	cjaponica@@@TRINITY_DN412_c0_g1_i1.p1	cremanei@@@TRINITY_DN1390_c0_g1_i1.p1,cremanei@@@TRINITY_DN1390_c0_g1_i4.p1,cremanei@@@TRINITY_DN1390_c0_g1_i5.p1,cremanei@@@TRINITY_DN1390_c0_g1_i6.p1	ppacificus@@@TRINITY_DN1136_c0_g1_i1.p1,ppacificus@@@TRINITY_DN1136_c0_g1_i2.p1
202	14	28	0.126	CEW1@@@TRINITY_DN320_c0_g1_i3.p1,CEW1@@@TRINITY_DN320_c0_g1_i4.p1	DF5006@@@TRINITY_DN205_c0_g1_i2.p1,DF5006@@@TRINITY_DN205_c0_g1_i3.p1	DF5012@@@TRINITY_DN11402_c0_g1_i4.p1,DF5012@@@TRINITY_DN11402_c0_g1_i5.p1	DF5112@@@TRINITY_DN334_c0_g1_i1.p1,DF5112@@@TRINITY_DN334_c0_g1_i6.p1,DF5112@@@TRINITY_DN334_c0_g1_i2.p1	MT8872@@@TRINITY_DN750_c0_g1_i1.p1,MT8872@@@TRINITY_DN750_c0_g1_i2.p1	F42H10.3a,F42H10.3b	cbrenneri@@@TRINITY_DN2152_c0_g1_i1.p1,cbrenneri@@@TRINITY_DN2152_c0_g1_i2.p1	cbriggsae@@@TRINITY_DN720_c0_g1_i1.p1,cbriggsae@@@TRINITY_DN720_c0_g1_i2.p1	celegans@@@TRINITY_DN1915_c0_g1_i2.p1,celegans@@@TRINITY_DN1915_c0_g1_i1.p1	celegans@@@TRINITY_GG_9084_c0_g1_i1.p1,celegans@@@TRINITY_GG_9084_c0_g1_i4.p1	cinopinata@@@TRINITY_DN256_c0_g1_i7.p1,cinopinata@@@TRINITY_DN256_c0_g1_i1.p1	cjaponica@@@TRINITY_DN872_c0_g1_i1.p1,cjaponica@@@TRINITY_DN872_c0_g1_i4.p1	cremanei@@@TRINITY_DN7072_c0_g1_i4.p1,cremanei@@@TRINITY_DN7072_c0_g1_i1.p1	ppacificus@@@TRINITY_DN1147_c0_g1_i3.p1
203	14	28	0.124	CEW1@@@TRINITY_DN281_c0_g1_i3.p1,CEW1@@@TRINITY_DN281_c0_g1_i1.p1	DF5006@@@TRINITY_DN1796_c0_g1_i1.p1,DF5006@@@TRINITY_DN1796_c0_g1_i4.p1	DF5012@@@TRINITY_DN1481_c0_g1_i1.p1,DF5012@@@TRINITY_DN1481_c0_g1_i2.p1	DF5112@@@TRINITY_DN623_c1_g1_i1.p1,DF5112@@@TRINITY_DN623_c1_g1_i3.p1	MT8872@@@TRINITY_DN4391_c0_g1_i1.p1	B0379.4a,B0379.4b	cbrenneri@@@TRINITY_DN3805_c0_g1_i3.p1,cbrenneri@@@TRINITY_DN3805_c0_g1_i2.p1	cbriggsae@@@TRINITY_DN1011_c0_g1_i3.p1,cbriggsae@@@TRINITY_DN1011_c0_g1_i2.p1	celegans@@@TRINITY_DN1418_c0_g2_i1.p1,celegans@@@TRINITY_DN1418_c0_g2_i2.p1	celegans@@@TRINITY_GG_22672_c0_g1_i1.p1	cinopinata@@@TRINITY_DN1561_c0_g1_i2.p1,cinopinata@@@TRINITY_DN1561_c0_g1_i3.p1	cjaponica@@@TRINITY_DN7942_c0_g1_i1.p1,cjaponica@@@TRINITY_DN7942_c0_g1_i2.p1	cremanei@@@TRINITY_DN436_c0_g1_i2.p1,cremanei@@@TRINITY_DN436_c0_g1_i3.p1,cremanei@@@TRINITY_DN436_c0_g1_i10.p1,cremanei@@@TRINITY_DN436_c0_g1_i4.p1,cremanei@@@TRINITY_DN436_c0_g1_i5.p1	ppacificus@@@TRINITY_DN2240_c0_g1_i2.p1
204	14	28	0.11	CEW1@@@TRINITY_DN2739_c0_g1_i1.p1,CEW1@@@TRINITY_DN2739_c0_g1_i2.p1	DF5006@@@TRINITY_DN2356_c0_g2_i1.p1,DF5006@@@TRINITY_DN2356_c0_g2_i2.p1	DF5012@@@TRINITY_DN1871_c0_g1_i1.p1,DF5012@@@TRINITY_DN1871_c0_g1_i3.p1,DF5012@@@TRINITY_DN1062_c0_g1_i1.p1	DF5112@@@TRINITY_DN1478_c0_g1_i1.p1,DF5112@@@TRINITY_DN1478_c0_g1_i2.p1	MT8872@@@TRINITY_DN3453_c0_g1_i1.p1,MT8872@@@TRINITY_DN3453_c0_g1_i3.p1,MT8872@@@TRINITY_DN3453_c0_g1_i2.p1	W02G9.5a,W02G9.5b	cbrenneri@@@TRINITY_DN5477_c0_g2_i1.p1	cbriggsae@@@TRINITY_DN3283_c0_g1_i1.p1	celegans@@@TRINITY_DN4956_c0_g1_i1.p1	celegans@@@TRINITY_GG_6040_c0_g1_i2.p1	cinopinata@@@TRINITY_DN2682_c0_g1_i1.p1,cinopinata@@@TRINITY_DN2682_c0_g1_i3.p1,cinopinata@@@TRINITY_DN2682_c0_g1_i5.p1,cinopinata@@@TRINITY_DN2682_c0_g1_i7.p1	cjaponica@@@TRINITY_DN8860_c0_g1_i1.p1	cremanei@@@TRINITY_DN4525_c0_g1_i1.p1,cremanei@@@TRINITY_DN4525_c0_g1_i2.p1	ppacificus@@@TRINITY_DN4889_c0_g2_i1.p1,ppacificus@@@TRINITY_DN4889_c0_g2_i2.p1,ppacificus@@@TRINITY_DN4889_c0_g2_i5.p1
205	14	28	0.109	CEW1@@@TRINITY_DN101_c0_g1_i1.p1,CEW1@@@TRINITY_DN101_c0_g2_i1.p1	DF5006@@@TRINITY_DN5059_c0_g1_i1.p1	DF5012@@@TRINITY_DN16164_c0_g1_i1.p1,DF5012@@@TRINITY_DN21877_c0_g1_i1.p1	DF5112@@@TRINITY_DN173_c0_g1_i2.p1,DF5112@@@TRINITY_DN173_c0_g1_i1.p1	MT8872@@@TRINITY_DN17225_c0_g1_i1.p1	T05G5.10a,T05G5.10b,F54C9.1	cbrenneri@@@TRINITY_DN31022_c0_g1_i1.p1,cbrenneri@@@TRINITY_DN3300_c0_g1_i3.p1	cbriggsae@@@TRINITY_DN16468_c0_g1_i1.p1,cbriggsae@@@TRINITY_DN10123_c0_g1_i1.p1	celegans@@@TRINITY_DN990_c0_g1_i1.p2,celegans@@@TRINITY_DN1168_c0_g1_i1.p1	celegans@@@TRINITY_GG_19418_c0_g1_i1.p2,celegans@@@TRINITY_GG_9062_c0_g1_i1.p2,celegans@@@TRINITY_GG_13112_c0_g1_i1.p1,celegans@@@TRINITY_GG_13112_c0_g1_i2.p1	cinopinata@@@TRINITY_DN547_c0_g1_i9.p1,cinopinata@@@TRINITY_DN547_c0_g1_i1.p1,cinopinata@@@TRINITY_DN547_c0_g1_i6.p1	cjaponica@@@TRINITY_DN1184_c0_g4_i1.p1	cremanei@@@TRINITY_DN28605_c0_g1_i1.p2,cremanei@@@TRINITY_DN2288_c0_g1_i1.p1	ppacificus@@@TRINITY_DN13386_c0_g1_i1.p1
206	14	27	0.659	CEW1@@@TRINITY_DN3246_c0_g2_i1.p2,CEW1@@@TRINITY_DN3246_c0_g2_i3.p1	DF5006@@@TRINITY_DN476_c0_g1_i1.p1,DF5006@@@TRINITY_DN476_c0_g1_i2.p1,DF5006@@@TRINITY_DN476_c0_g1_i3.p1,DF5006@@@TRINITY_DN476_c0_g1_i4.p1,DF5006@@@TRINITY_DN476_c0_g1_i5.p1,DF5006@@@TRINITY_DN476_c0_g1_i6.p1	DF5012@@@TRINITY_DN1488_c0_g1_i1.p1,DF5012@@@TRINITY_DN1488_c0_g1_i2.p1	DF5112@@@TRINITY_DN4293_c0_g1_i1.p1,DF5112@@@TRINITY_DN4293_c0_g1_i2.p1	MT8872@@@TRINITY_DN4879_c0_g1_i1.p1	T22D1.3a,T22D1.3c	cbrenneri@@@TRINITY_DN6083_c0_g1_i1.p1,cbrenneri@@@TRINITY_DN6083_c0_g1_i2.p1	cbriggsae@@@TRINITY_DN3702_c0_g1_i2.p1	celegans@@@TRINITY_DN7259_c0_g4_i2.p1	celegans@@@TRINITY_GG_3708_c0_g1_i1.p1	cinopinata@@@TRINITY_DN3259_c0_g1_i1.p1,cinopinata@@@TRINITY_DN3259_c0_g1_i2.p1	cjaponica@@@TRINITY_DN3524_c0_g1_i1.p1,cjaponica@@@TRINITY_DN3524_c0_g1_i2.p1	cremanei@@@TRINITY_DN18575_c0_g1_i1.p1,cremanei@@@TRINITY_DN18575_c0_g1_i4.p1	ppacificus@@@TRINITY_DN8361_c0_g1_i2.p1
207	14	27	0.572	CEW1@@@TRINITY_DN18051_c0_g1_i1.p1	DF5006@@@TRINITY_DN15394_c0_g1_i1.p1	DF5012@@@TRINITY_DN1004_c0_g1_i1.p1,DF5012@@@TRINITY_DN1004_c0_g1_i2.p1	DF5112@@@TRINITY_DN753_c2_g1_i1.p1	MT8872@@@TRINITY_DN8069_c0_g1_i1.p1	T05A8.4	cbrenneri@@@TRINITY_DN738_c0_g2_i1.p1,cbrenneri@@@TRINITY_DN738_c0_g2_i2.p1	cbriggsae@@@TRINITY_DN1647_c0_g1_i1.p1,cbriggsae@@@TRINITY_DN1647_c0_g1_i2.p1	celegans@@@TRINITY_DN2538_c0_g1_i1.p1,celegans@@@TRINITY_DN2538_c0_g1_i2.p1,celegans@@@TRINITY_DN2538_c0_g1_i3.p1	celegans@@@TRINITY_GG_13457_c0_g1_i1.p1,celegans@@@TRINITY_GG_13457_c0_g1_i2.p1	cinopinata@@@TRINITY_DN874_c1_g1_i1.p1	cjaponica@@@TRINITY_DN3853_c0_g1_i1.p1	cremanei@@@TRINITY_DN1245_c0_g1_i1.p1,cremanei@@@TRINITY_DN1245_c0_g1_i2.p1,cremanei@@@TRINITY_DN1245_c0_g1_i3.p1,cremanei@@@TRINITY_DN1245_c0_g1_i4.p1,cremanei@@@TRINITY_DN1245_c0_g1_i5.p1,cremanei@@@TRINITY_DN1245_c0_g1_i6.p1	ppacificus@@@TRINITY_DN49_c0_g1_i1.p1,ppacificus@@@TRINITY_DN49_c0_g1_i2.p1,ppacificus@@@TRINITY_DN49_c0_g1_i3.p1
208	14	27	0.53	CEW1@@@TRINITY_DN780_c0_g1_i2.p1,CEW1@@@TRINITY_DN780_c0_g1_i3.p1	DF5006@@@TRINITY_DN1159_c0_g1_i1.p1,DF5006@@@TRINITY_DN1159_c0_g1_i2.p1	DF5012@@@TRINITY_DN4777_c0_g1_i1.p1,DF5012@@@TRINITY_DN4777_c0_g1_i2.p1,DF5012@@@TRINITY_DN4777_c0_g1_i3.p1,DF5012@@@TRINITY_DN4777_c0_g1_i4.p1	DF5112@@@TRINITY_DN927_c0_g1_i1.p1,DF5112@@@TRINITY_DN927_c0_g1_i3.p1	MT8872@@@TRINITY_DN2386_c0_g1_i2.p1	R160.1a,R160.1b	cbrenneri@@@TRINITY_DN3896_c0_g1_i1.p1,cbrenneri@@@TRINITY_DN3896_c0_g1_i2.p1	cbriggsae@@@TRINITY_DN2911_c0_g1_i1.p1,cbriggsae@@@TRINITY_DN2911_c0_g1_i2.p1	celegans@@@TRINITY_DN3398_c0_g1_i1.p1,celegans@@@TRINITY_DN3398_c0_g1_i2.p1	celegans@@@TRINITY_GG_5501_c0_g1_i1.p1	cinopinata@@@TRINITY_DN1245_c0_g1_i1.p1,cinopinata@@@TRINITY_DN1245_c0_g1_i2.p1	cjaponica@@@TRINITY_DN1101_c0_g1_i2.p1	cremanei@@@TRINITY_DN3219_c0_g1_i1.p1,cremanei@@@TRINITY_DN3219_c0_g1_i2.p1	ppacificus@@@TRINITY_DN7164_c0_g1_i1.p1,ppacificus@@@TRINITY_DN7164_c0_g1_i2.p1
209	14	27	0.436	CEW1@@@TRINITY_DN1028_c0_g1_i1.p1,CEW1@@@TRINITY_DN1028_c0_g1_i8.p1	DF5006@@@TRINITY_DN7479_c0_g1_i3.p1,DF5006@@@TRINITY_DN7479_c0_g1_i1.p1	DF5012@@@TRINITY_DN5057_c0_g1_i4.p1,DF5012@@@TRINITY_DN5057_c0_g1_i5.p1	DF5112@@@TRINITY_DN822_c0_g1_i8.p1	MT8872@@@TRINITY_DN5418_c0_g1_i2.p1	T21C12.1c,T21C12.1e,T21C12.1k,T21C12.1d	cbrenneri@@@TRINITY_DN5320_c0_g1_i10.p1	cbriggsae@@@TRINITY_DN2925_c0_g1_i4.p1,cbriggsae@@@TRINITY_DN2925_c0_g1_i6.p1	celegans@@@TRINITY_DN889_c0_g1_i1.p1,celegans@@@TRINITY_DN889_c0_g1_i4.p1	celegans@@@TRINITY_GG_9154_c0_g1_i4.p1,celegans@@@TRINITY_GG_9154_c0_g1_i1.p1	cinopinata@@@TRINITY_DN1877_c0_g2_i4.p1,cinopinata@@@TRINITY_DN1877_c0_g2_i7.p1	cjaponica@@@TRINITY_DN2184_c0_g1_i5.p1,cjaponica@@@TRINITY_DN2184_c0_g1_i6.p1	cremanei@@@TRINITY_DN876_c0_g1_i10.p1,cremanei@@@TRINITY_DN876_c0_g1_i7.p1	ppacificus@@@TRINITY_DN1517_c0_g1_i2.p1,ppacificus@@@TRINITY_DN1517_c0_g1_i1.p1
210	14	27	0.408	CEW1@@@TRINITY_DN975_c0_g1_i1.p1	DF5006@@@TRINITY_DN519_c0_g1_i1.p1,DF5006@@@TRINITY_DN519_c0_g1_i2.p1	DF5012@@@TRINITY_DN2709_c0_g1_i1.p1,DF5012@@@TRINITY_DN2709_c0_g1_i2.p1	DF5112@@@TRINITY_DN188_c0_g1_i1.p1,DF5112@@@TRINITY_DN188_c0_g1_i2.p1	MT8872@@@TRINITY_DN1122_c0_g1_i1.p1,MT8872@@@TRINITY_DN1122_c0_g1_i2.p1	T11G6.1a,T11G6.1b	cbrenneri@@@TRINITY_DN1394_c0_g1_i2.p1,cbrenneri@@@TRINITY_DN1394_c0_g1_i1.p1	cbriggsae@@@TRINITY_DN1884_c0_g1_i1.p1,cbriggsae@@@TRINITY_DN1884_c0_g1_i2.p1	celegans@@@TRINITY_DN1498_c0_g1_i2.p1,celegans@@@TRINITY_DN1498_c0_g1_i1.p1	celegans@@@TRINITY_GG_2082_c0_g1_i1.p1,celegans@@@TRINITY_GG_2082_c0_g1_i2.p1	cinopinata@@@TRINITY_DN4100_c0_g1_i2.p1,cinopinata@@@TRINITY_DN4100_c0_g1_i1.p1	cjaponica@@@TRINITY_DN496_c0_g1_i1.p1,cjaponica@@@TRINITY_DN496_c0_g1_i3.p1	cremanei@@@TRINITY_DN2304_c0_g1_i2.p1,cremanei@@@TRINITY_DN2304_c0_g1_i1.p1	ppacificus@@@TRINITY_DN703_c0_g1_i1.p1,ppacificus@@@TRINITY_DN703_c0_g1_i2.p1
211	14	27	0.359	CEW1@@@TRINITY_DN5001_c0_g2_i1.p1	DF5006@@@TRINITY_DN1706_c0_g1_i1.p1,DF5006@@@TRINITY_DN1706_c0_g1_i2.p1	DF5012@@@TRINITY_DN5674_c0_g3_i2.p1	DF5112@@@TRINITY_DN1787_c0_g1_i1.p1,DF5112@@@TRINITY_DN1787_c0_g1_i2.p1	MT8872@@@TRINITY_DN2888_c0_g1_i1.p1,MT8872@@@TRINITY_DN2888_c0_g1_i2.p1	T18H9.5b,T18H9.5c,T18H9.5a	cbrenneri@@@TRINITY_DN5206_c0_g1_i1.p1,cbrenneri@@@TRINITY_DN5206_c0_g1_i3.p1,cbrenneri@@@TRINITY_DN5206_c0_g1_i2.p1	cbriggsae@@@TRINITY_DN3593_c0_g1_i2.p1,cbriggsae@@@TRINITY_DN3593_c0_g1_i1.p1	celegans@@@TRINITY_DN11617_c0_g1_i1.p1	celegans@@@TRINITY_GG_17560_c0_g1_i1.p1	cinopinata@@@TRINITY_DN3765_c0_g1_i1.p1,cinopinata@@@TRINITY_DN3765_c0_g1_i2.p1,cinopinata@@@TRINITY_DN3765_c0_g1_i9.p1,cinopinata@@@TRINITY_DN3765_c0_g1_i3.p1	cjaponica@@@TRINITY_DN15359_c0_g1_i3.p1	cremanei@@@TRINITY_DN9709_c0_g1_i1.p1,cremanei@@@TRINITY_DN9709_c0_g1_i7.p1,cremanei@@@TRINITY_DN9709_c0_g1_i8.p1	ppacificus@@@TRINITY_DN10993_c0_g4_i2.p1
212	14	27	0.348	CEW1@@@TRINITY_DN18165_c0_g1_i1.p1	DF5006@@@TRINITY_DN3806_c0_g2_i3.p1,DF5006@@@TRINITY_DN3806_c0_g2_i4.p1,DF5006@@@TRINITY_DN3806_c0_g2_i5.p1,DF5006@@@TRINITY_DN3806_c0_g2_i8.p1	DF5012@@@TRINITY_DN3767_c0_g1_i1.p1,DF5012@@@TRINITY_DN3767_c0_g1_i2.p1,DF5012@@@TRINITY_DN3767_c0_g1_i3.p1,DF5012@@@TRINITY_DN3767_c0_g1_i4.p1	DF5112@@@TRINITY_DN2014_c0_g3_i1.p1	MT8872@@@TRINITY_DN7643_c0_g1_i1.p1	C48A7.1b,C48A7.1a	cbrenneri@@@TRINITY_DN2699_c0_g1_i2.p1	cbriggsae@@@TRINITY_DN1321_c0_g2_i1.p1,cbriggsae@@@TRINITY_DN1321_c0_g2_i2.p1	celegans@@@TRINITY_DN5620_c0_g1_i1.p1	celegans@@@TRINITY_GG_3614_c0_g1_i1.p1	cinopinata@@@TRINITY_DN6148_c0_g1_i4.p1	cjaponica@@@TRINITY_DN4125_c0_g1_i1.p1,cjaponica@@@TRINITY_DN4125_c0_g1_i2.p1,cjaponica@@@TRINITY_DN4125_c0_g1_i4.p1	cremanei@@@TRINITY_DN5232_c0_g1_i1.p1,cremanei@@@TRINITY_DN5232_c0_g1_i4.p1,cremanei@@@TRINITY_DN5232_c0_g1_i7.p1	ppacificus@@@TRINITY_DN1945_c0_g1_i2.p1,ppacificus@@@TRINITY_DN1945_c0_g1_i3.p1
213	14	27	0.346	CEW1@@@TRINITY_DN13055_c0_g1_i1.p1	DF5006@@@TRINITY_DN12105_c0_g1_i1.p1	DF5012@@@TRINITY_DN15702_c0_g1_i1.p1,DF5012@@@TRINITY_DN24065_c0_g1_i1.p1	DF5112@@@TRINITY_DN161_c0_g1_i1.p1,DF5112@@@TRINITY_DN2897_c0_g1_i1.p1	MT8872@@@TRINITY_DN4378_c0_g1_i1.p1	K09A9.5,T26A5.3	cbrenneri@@@TRINITY_DN1435_c0_g1_i1.p1,cbrenneri@@@TRINITY_DN1435_c0_g4_i1.p1	cbriggsae@@@TRINITY_DN22992_c0_g1_i1.p1,cbriggsae@@@TRINITY_DN2242_c0_g1_i1.p1	celegans@@@TRINITY_DN177_c0_g1_i2.p1,celegans@@@TRINITY_DN177_c0_g1_i1.p1	celegans@@@TRINITY_GG_17040_c0_g1_i1.p1,celegans@@@TRINITY_GG_9186_c0_g1_i1.p1	cinopinata@@@TRINITY_DN9587_c0_g1_i1.p1,cinopinata@@@TRINITY_DN23644_c0_g1_i1.p1	cjaponica@@@TRINITY_DN2936_c0_g1_i1.p1,cjaponica@@@TRINITY_DN2936_c0_g2_i1.p1,cjaponica@@@TRINITY_DN2936_c0_g2_i2.p1,cjaponica@@@TRINITY_DN2936_c0_g2_i3.p1	cremanei@@@TRINITY_DN3347_c0_g1_i1.p1,cremanei@@@TRINITY_DN3804_c0_g1_i1.p1	ppacificus@@@TRINITY_DN230_c0_g2_i1.p1,ppacificus@@@TRINITY_DN230_c0_g3_i1.p1
214	14	27	0.295	CEW1@@@TRINITY_DN337_c0_g1_i2.p1,CEW1@@@TRINITY_DN337_c0_g1_i4.p1	DF5006@@@TRINITY_DN2304_c0_g1_i2.p1,DF5006@@@TRINITY_DN2304_c0_g1_i3.p1	DF5012@@@TRINITY_DN1724_c0_g1_i1.p1,DF5012@@@TRINITY_DN1724_c0_g1_i2.p1,DF5012@@@TRINITY_DN1724_c0_g1_i3.p1	DF5112@@@TRINITY_DN281_c0_g1_i1.p1	MT8872@@@TRINITY_DN13_c0_g1_i2.p1	R151.2d,R151.2a,R151.2b,R151.2c	cbrenneri@@@TRINITY_DN4645_c0_g1_i2.p1	cbriggsae@@@TRINITY_DN941_c0_g1_i1.p1,cbriggsae@@@TRINITY_DN941_c0_g1_i2.p1	celegans@@@TRINITY_DN628_c0_g1_i2.p1	celegans@@@TRINITY_GG_9214_c0_g1_i1.p1	cinopinata@@@TRINITY_DN4934_c0_g1_i1.p1	cjaponica@@@TRINITY_DN126_c0_g1_i5.p1,cjaponica@@@TRINITY_DN126_c0_g1_i1.p1,cjaponica@@@TRINITY_DN126_c0_g1_i2.p1	cremanei@@@TRINITY_DN4155_c0_g1_i2.p1,cremanei@@@TRINITY_DN4155_c0_g1_i3.p1,cremanei@@@TRINITY_DN4155_c0_g1_i1.p1	ppacificus@@@TRINITY_DN899_c0_g1_i1.p1,ppacificus@@@TRINITY_DN899_c0_g1_i2.p1
215	14	27	0.276	CEW1@@@TRINITY_DN3594_c0_g1_i1.p1	DF5006@@@TRINITY_DN2554_c0_g2_i2.p1,DF5006@@@TRINITY_DN2554_c0_g2_i1.p1	DF5012@@@TRINITY_DN4025_c0_g1_i4.p1	DF5112@@@TRINITY_DN3444_c0_g1_i1.p1,DF5112@@@TRINITY_DN3444_c0_g1_i2.p1	MT8872@@@TRINITY_DN4687_c0_g1_i1.p1	M79.1a,M79.1b,M79.1d,M79.1e,M79.1c	cbrenneri@@@TRINITY_DN15799_c0_g1_i1.p1,cbrenneri@@@TRINITY_DN15799_c0_g1_i2.p1	cbriggsae@@@TRINITY_DN2742_c0_g1_i1.p1	celegans@@@TRINITY_DN2110_c0_g1_i1.p1,celegans@@@TRINITY_DN2110_c0_g1_i2.p1,celegans@@@TRINITY_DN2110_c0_g1_i3.p1,celegans@@@TRINITY_DN2110_c0_g1_i4.p1	celegans@@@TRINITY_GG_16559_c0_g1_i1.p1,celegans@@@TRINITY_GG_16559_c0_g1_i2.p1	cinopinata@@@TRINITY_DN2507_c0_g1_i1.p1,cinopinata@@@TRINITY_DN2507_c0_g1_i2.p1	cjaponica@@@TRINITY_DN474_c0_g2_i1.p1,cjaponica@@@TRINITY_DN474_c0_g2_i2.p1	cremanei@@@TRINITY_DN6295_c0_g1_i1.p1	ppacificus@@@TRINITY_DN7901_c0_g2_i1.p1
216	14	27	0.264	CEW1@@@TRINITY_DN1297_c0_g1_i1.p1	DF5006@@@TRINITY_DN1771_c1_g1_i2.p1	DF5012@@@TRINITY_DN661_c0_g1_i2.p1,DF5012@@@TRINITY_DN661_c0_g1_i1.p1	DF5112@@@TRINITY_DN14553_c0_g1_i1.p1	MT8872@@@TRINITY_DN1056_c0_g1_i1.p1,MT8872@@@TRINITY_DN1056_c0_g1_i2.p1,MT8872@@@TRINITY_DN1056_c0_g1_i3.p1,MT8872@@@TRINITY_DN1056_c0_g1_i4.p1	F41E6.13a,F41E6.13b	cbrenneri@@@TRINITY_DN6170_c0_g1_i1.p1,cbrenneri@@@TRINITY_DN6170_c0_g1_i2.p1,cbrenneri@@@TRINITY_DN6170_c0_g1_i3.p1	cbriggsae@@@TRINITY_DN1802_c0_g1_i1.p1	celegans@@@TRINITY_DN563_c0_g1_i1.p1,celegans@@@TRINITY_DN563_c0_g1_i2.p1	celegans@@@TRINITY_GG_18938_c0_g1_i2.p1,celegans@@@TRINITY_GG_18938_c0_g1_i1.p1	cinopinata@@@TRINITY_DN1541_c0_g1_i2.p1,cinopinata@@@TRINITY_DN1541_c0_g1_i1.p1	cjaponica@@@TRINITY_DN122_c0_g1_i3.p1,cjaponica@@@TRINITY_DN122_c0_g1_i1.p1,cjaponica@@@TRINITY_DN122_c0_g1_i2.p1	cremanei@@@TRINITY_DN3105_c0_g1_i2.p1,cremanei@@@TRINITY_DN3105_c0_g1_i1.p1	ppacificus@@@TRINITY_DN2477_c0_g1_i11.p1
217	14	27	0.256	CEW1@@@TRINITY_DN3237_c0_g2_i2.p1	DF5006@@@TRINITY_DN1609_c0_g1_i1.p1	DF5012@@@TRINITY_DN754_c0_g1_i2.p1,DF5012@@@TRINITY_DN754_c0_g1_i5.p1,DF5012@@@TRINITY_DN754_c0_g1_i4.p1	DF5112@@@TRINITY_DN6761_c0_g1_i4.p1,DF5112@@@TRINITY_DN6761_c0_g1_i5.p1	MT8872@@@TRINITY_DN951_c0_g1_i1.p1,MT8872@@@TRINITY_DN951_c0_g1_i4.p1,MT8872@@@TRINITY_DN951_c0_g1_i5.p1	C32A3.3a,C32A3.3b	cbrenneri@@@TRINITY_DN2447_c0_g1_i1.p1,cbrenneri@@@TRINITY_DN2447_c0_g1_i2.p1	cbriggsae@@@TRINITY_DN15153_c0_g1_i1.p1,cbriggsae@@@TRINITY_DN15153_c0_g1_i3.p1,cbriggsae@@@TRINITY_DN15153_c0_g1_i2.p1	celegans@@@TRINITY_DN5565_c0_g4_i1.p1	celegans@@@TRINITY_GG_9618_c0_g1_i1.p1,celegans@@@TRINITY_GG_9618_c0_g1_i2.p1	cinopinata@@@TRINITY_DN2406_c0_g1_i1.p1	cjaponica@@@TRINITY_DN1246_c0_g1_i2.p1,cjaponica@@@TRINITY_DN1246_c0_g1_i3.p1	cremanei@@@TRINITY_DN24710_c0_g1_i1.p1,cremanei@@@TRINITY_DN24710_c0_g1_i2.p1	ppacificus@@@TRINITY_DN2303_c0_g1_i1.p1,ppacificus@@@TRINITY_DN2303_c0_g1_i2.p1
218	14	27	0.25	CEW1@@@TRINITY_DN18541_c0_g1_i1.p1	DF5006@@@TRINITY_DN1967_c0_g1_i1.p1	DF5012@@@TRINITY_DN7343_c0_g1_i1.p1,DF5012@@@TRINITY_DN497_c0_g1_i1.p1	DF5112@@@TRINITY_DN4196_c0_g1_i1.p1	MT8872@@@TRINITY_DN13669_c0_g1_i1.p1,MT8872@@@TRINITY_DN5692_c0_g1_i1.p1,MT8872@@@TRINITY_DN15863_c0_g1_i1.p1,MT8872@@@TRINITY_DN773_c0_g1_i1.p1	C27D8.1	cbrenneri@@@TRINITY_DN131_c0_g1_i2.p1	cbriggsae@@@TRINITY_DN770_c0_g1_i1.p1,cbriggsae@@@TRINITY_DN770_c0_g2_i1.p1	celegans@@@TRINITY_DN17673_c0_g1_i1.p1	celegans@@@TRINITY_GG_2549_c0_g1_i1.p1	cinopinata@@@TRINITY_DN625_c0_g1_i3.p1,cinopinata@@@TRINITY_DN625_c0_g1_i1.p1,cinopinata@@@TRINITY_DN625_c0_g1_i5.p1,cinopinata@@@TRINITY_DN625_c0_g1_i6.p1,cinopinata@@@TRINITY_DN625_c0_g1_i8.p1,cinopinata@@@TRINITY_DN625_c0_g1_i2.p1	cjaponica@@@TRINITY_DN26720_c0_g1_i1.p1	cremanei@@@TRINITY_DN2016_c0_g1_i1.p1,cremanei@@@TRINITY_DN2016_c0_g1_i6.p1,cremanei@@@TRINITY_DN2016_c0_g1_i5.p1	ppacificus@@@TRINITY_DN10306_c0_g1_i2.p1,ppacificus@@@TRINITY_DN10306_c0_g2_i1.p1
219	14	27	0.195	CEW1@@@TRINITY_DN2286_c0_g1_i1.p1	DF5006@@@TRINITY_DN2251_c0_g1_i4.p1	DF5012@@@TRINITY_DN2650_c0_g1_i1.p1,DF5012@@@TRINITY_DN2650_c0_g1_i4.p1	DF5112@@@TRINITY_DN1999_c0_g4_i1.p1	MT8872@@@TRINITY_DN4349_c0_g1_i1.p1	F28B12.2a,F28B12.2b,F28B12.2c,F28B12.2g,F28B12.2h,F28B12.2i,F28B12.2f,F28B12.2k,F28B12.2d,F28B12.2j	cbrenneri@@@TRINITY_DN7811_c0_g1_i1.p1	cbriggsae@@@TRINITY_DN2146_c0_g1_i1.p1	celegans@@@TRINITY_DN1704_c0_g1_i1.p1,celegans@@@TRINITY_DN1704_c0_g1_i2.p1	celegans@@@TRINITY_GG_1666_c0_g1_i1.p1,celegans@@@TRINITY_GG_1666_c0_g1_i2.p1	cinopinata@@@TRINITY_DN5105_c1_g1_i1.p1,cinopinata@@@TRINITY_DN5105_c1_g1_i2.p1	cjaponica@@@TRINITY_DN3537_c0_g1_i1.p1	cremanei@@@TRINITY_DN11110_c0_g1_i1.p1	ppacificus@@@TRINITY_DN2844_c0_g1_i3.p1
220	14	27	0.18	CEW1@@@TRINITY_DN7793_c0_g1_i1.p1,CEW1@@@TRINITY_DN5204_c0_g1_i2.p1	DF5006@@@TRINITY_DN1457_c0_g2_i1.p1,DF5006@@@TRINITY_DN1457_c0_g1_i1.p1,DF5006@@@TRINITY_DN217_c0_g1_i1.p1	DF5012@@@TRINITY_DN2008_c0_g2_i1.p1,DF5012@@@TRINITY_DN6063_c0_g1_i1.p1,DF5012@@@TRINITY_DN2008_c0_g1_i1.p1	DF5112@@@TRINITY_DN3120_c0_g1_i1.p1,DF5112@@@TRINITY_DN4836_c0_g1_i1.p1	MT8872@@@TRINITY_DN18869_c0_g1_i1.p1	C27D6.11,Y38H8A.4,B0511.4	cbrenneri@@@TRINITY_DN3466_c0_g1_i1.p1	cbriggsae@@@TRINITY_DN22906_c0_g1_i1.p1	celegans@@@TRINITY_DN1084_c0_g1_i1.p1,celegans@@@TRINITY_DN1084_c0_g1_i3.p1,celegans@@@TRINITY_DN7946_c0_g1_i2.p1	celegans@@@TRINITY_GG_13767_c0_g1_i2.p1,celegans@@@TRINITY_GG_14894_c0_g1_i1.p1,celegans@@@TRINITY_GG_10611_c0_g1_i1.p1	cinopinata@@@TRINITY_DN19793_c0_g1_i1.p1	cjaponica@@@TRINITY_DN8012_c0_g1_i1.p1	cremanei@@@TRINITY_DN1178_c0_g1_i1.p1,cremanei@@@TRINITY_DN1178_c0_g1_i2.p1	ppacificus@@@TRINITY_DN17227_c0_g1_i1.p1
221	14	27	0.177	CEW1@@@TRINITY_DN18524_c0_g1_i1.p1	DF5006@@@TRINITY_DN8271_c0_g1_i1.p1	DF5012@@@TRINITY_DN68_c1_g1_i2.p1	DF5112@@@TRINITY_DN603_c0_g1_i5.p1,DF5112@@@TRINITY_DN603_c0_g1_i4.p1	MT8872@@@TRINITY_DN2871_c0_g1_i1.p1	R11D1.1a,R11D1.1b,R11D1.1c,R11D1.1d	cbrenneri@@@TRINITY_DN21537_c0_g1_i1.p1	cbriggsae@@@TRINITY_DN94_c0_g1_i2.p1,cbriggsae@@@TRINITY_DN94_c0_g1_i4.p1	celegans@@@TRINITY_DN3348_c0_g1_i3.p1,celegans@@@TRINITY_DN3348_c0_g1_i2.p1	celegans@@@TRINITY_GG_6881_c0_g1_i2.p1,celegans@@@TRINITY_GG_6881_c0_g1_i1.p1	cinopinata@@@TRINITY_DN6781_c0_g1_i1.p1,cinopinata@@@TRINITY_DN6781_c0_g1_i2.p1,cinopinata@@@TRINITY_DN6781_c0_g1_i3.p1	cjaponica@@@TRINITY_DN7154_c0_g1_i1.p1	cremanei@@@TRINITY_DN3271_c0_g2_i1.p1,cremanei@@@TRINITY_DN3271_c0_g2_i5.p1,cremanei@@@TRINITY_DN3271_c0_g2_i3.p1,cremanei@@@TRINITY_DN3271_c0_g2_i4.p1,cremanei@@@TRINITY_DN3271_c0_g2_i6.p1	ppacificus@@@TRINITY_DN4542_c0_g3_i1.p1
222	14	27	0.174	CEW1@@@TRINITY_DN1535_c0_g1_i8.p1,CEW1@@@TRINITY_DN1535_c0_g1_i1.p1,CEW1@@@TRINITY_DN1535_c0_g1_i11.p1,CEW1@@@TRINITY_DN1535_c0_g1_i4.p1,CEW1@@@TRINITY_DN1535_c0_g1_i6.p1	DF5006@@@TRINITY_DN137_c1_g1_i12.p1	DF5012@@@TRINITY_DN1718_c0_g1_i2.p1,DF5012@@@TRINITY_DN1718_c0_g1_i3.p1	DF5112@@@TRINITY_DN1515_c0_g1_i1.p1	MT8872@@@TRINITY_DN5678_c0_g1_i1.p1,MT8872@@@TRINITY_DN5678_c0_g1_i2.p1	B0303.7b,B0303.7a	cbrenneri@@@TRINITY_DN4_c0_g1_i2.p1,cbrenneri@@@TRINITY_DN4_c0_g1_i1.p1	cbriggsae@@@TRINITY_DN3009_c0_g1_i1.p1	celegans@@@TRINITY_DN2683_c0_g1_i1.p1	celegans@@@TRINITY_GG_8558_c0_g1_i1.p1	cinopinata@@@TRINITY_DN1231_c0_g1_i2.p1,cinopinata@@@TRINITY_DN1231_c0_g1_i1.p1,cinopinata@@@TRINITY_DN1231_c0_g1_i3.p1	cjaponica@@@TRINITY_DN3867_c0_g1_i4.p1	cremanei@@@TRINITY_DN2723_c0_g1_i1.p1,cremanei@@@TRINITY_DN2723_c0_g1_i2.p1,cremanei@@@TRINITY_DN2723_c0_g1_i3.p1	ppacificus@@@TRINITY_DN1921_c0_g1_i2.p1,ppacificus@@@TRINITY_DN1921_c0_g1_i1.p1
223	14	27	0.173	CEW1@@@TRINITY_DN4911_c0_g1_i1.p1,CEW1@@@TRINITY_DN4911_c0_g1_i2.p1	DF5006@@@TRINITY_DN462_c0_g1_i1.p1,DF5006@@@TRINITY_DN462_c0_g1_i2.p1	DF5012@@@TRINITY_DN10115_c0_g1_i2.p1,DF5012@@@TRINITY_DN7094_c0_g1_i1.p1,DF5012@@@TRINITY_DN7094_c0_g1_i3.p1	DF5112@@@TRINITY_DN8881_c0_g1_i1.p1,DF5112@@@TRINITY_DN5938_c0_g1_i1.p1	MT8872@@@TRINITY_DN19571_c0_g1_i1.p1	Y75B8A.16,C11H1.2	cbrenneri@@@TRINITY_DN2098_c0_g1_i1.p1,cbrenneri@@@TRINITY_DN242_c0_g2_i1.p1,cbrenneri@@@TRINITY_DN242_c0_g2_i2.p1	cbriggsae@@@TRINITY_DN13333_c0_g1_i1.p1	celegans@@@TRINITY_DN7375_c0_g2_i1.p1,celegans@@@TRINITY_DN6464_c0_g1_i2.p1	celegans@@@TRINITY_GG_8056_c0_g1_i1.p1,celegans@@@TRINITY_GG_16084_c0_g1_i1.p1	cinopinata@@@TRINITY_DN1716_c0_g1_i1.p1,cinopinata@@@TRINITY_DN4585_c0_g1_i1.p1	cjaponica@@@TRINITY_DN4627_c0_g1_i1.p1	cremanei@@@TRINITY_DN7206_c0_g1_i1.p1,cremanei@@@TRINITY_DN7206_c0_g1_i3.p1,cremanei@@@TRINITY_DN9240_c0_g1_i1.p1	ppacificus@@@TRINITY_DN5254_c0_g1_i1.p1
224	14	27	0.171	CEW1@@@TRINITY_DN955_c0_g1_i3.p1,CEW1@@@TRINITY_DN955_c0_g1_i2.p1	DF5006@@@TRINITY_DN722_c0_g2_i2.p1,DF5006@@@TRINITY_DN722_c0_g2_i1.p1	DF5012@@@TRINITY_DN3529_c0_g1_i2.p1,DF5012@@@TRINITY_DN3529_c0_g1_i3.p1	DF5112@@@TRINITY_DN5923_c0_g1_i3.p1,DF5112@@@TRINITY_DN5923_c0_g1_i5.p1,DF5112@@@TRINITY_DN5923_c0_g1_i4.p1	MT8872@@@TRINITY_DN2223_c0_g1_i5.p1,MT8872@@@TRINITY_DN2223_c0_g1_i4.p1	C09F5.2a,C09F5.2b	cbrenneri@@@TRINITY_DN829_c0_g1_i3.p1	cbriggsae@@@TRINITY_DN1632_c0_g1_i7.p1,cbriggsae@@@TRINITY_DN1632_c0_g1_i6.p1,cbriggsae@@@TRINITY_DN1632_c0_g1_i4.p1	celegans@@@TRINITY_DN507_c0_g1_i1.p1,celegans@@@TRINITY_DN507_c0_g1_i2.p1,celegans@@@TRINITY_DN507_c0_g1_i3.p1	celegans@@@TRINITY_GG_8498_c0_g1_i1.p1	cinopinata@@@TRINITY_DN14123_c0_g1_i3.p1,cinopinata@@@TRINITY_DN14123_c0_g1_i1.p1	cjaponica@@@TRINITY_DN822_c1_g1_i9.p1	cremanei@@@TRINITY_DN248_c0_g1_i2.p1,cremanei@@@TRINITY_DN248_c0_g1_i3.p1	ppacificus@@@TRINITY_DN4247_c0_g1_i4.p1
225	14	27	0.167	CEW1@@@TRINITY_DN20518_c0_g1_i1.p1	DF5006@@@TRINITY_DN431_c0_g1_i1.p1	DF5012@@@TRINITY_DN6287_c0_g1_i1.p1,DF5012@@@TRINITY_DN20310_c0_g1_i1.p1	DF5112@@@TRINITY_DN2214_c0_g1_i1.p1,DF5112@@@TRINITY_DN13969_c0_g1_i1.p1	MT8872@@@TRINITY_DN4673_c0_g1_i1.p2	F40F4.4a,ZK742.5,F40F4.4b	cbrenneri@@@TRINITY_DN7615_c0_g1_i2.p1,cbrenneri@@@TRINITY_DN3598_c0_g1_i1.p1	cbriggsae@@@TRINITY_DN3855_c0_g1_i1.p1,cbriggsae@@@TRINITY_DN5169_c0_g1_i1.p1	celegans@@@TRINITY_DN2111_c0_g1_i1.p1,celegans@@@TRINITY_DN2600_c0_g1_i1.p1	celegans@@@TRINITY_GG_5365_c0_g1_i1.p1,celegans@@@TRINITY_GG_7336_c0_g1_i1.p1	cinopinata@@@TRINITY_DN3078_c0_g1_i2.p1,cinopinata@@@TRINITY_DN4382_c0_g1_i1.p1,cinopinata@@@TRINITY_DN3078_c0_g1_i1.p1	cjaponica@@@TRINITY_DN1285_c0_g1_i1.p1,cjaponica@@@TRINITY_DN2201_c0_g1_i1.p1	cremanei@@@TRINITY_DN3674_c0_g1_i1.p1,cremanei@@@TRINITY_DN4299_c0_g1_i1.p1	ppacificus@@@TRINITY_DN15262_c0_g2_i1.p1,ppacificus@@@TRINITY_DN29629_c0_g1_i1.p1
226	14	27	0.164	CEW1@@@TRINITY_DN1751_c0_g1_i3.p1,CEW1@@@TRINITY_DN1751_c0_g1_i2.p1	DF5006@@@TRINITY_DN3916_c1_g1_i1.p1,DF5006@@@TRINITY_DN3916_c1_g1_i2.p1	DF5012@@@TRINITY_DN1096_c0_g1_i1.p1,DF5012@@@TRINITY_DN1096_c0_g1_i2.p1	DF5112@@@TRINITY_DN1321_c0_g1_i1.p1	MT8872@@@TRINITY_DN280_c0_g1_i3.p1	F54G8.4a,F54G8.4b	cbrenneri@@@TRINITY_DN4680_c0_g1_i2.p1,cbrenneri@@@TRINITY_DN4680_c0_g1_i1.p1	cbriggsae@@@TRINITY_DN4914_c0_g1_i1.p1,cbriggsae@@@TRINITY_DN4914_c0_g1_i2.p1	celegans@@@TRINITY_DN3987_c0_g1_i1.p1,celegans@@@TRINITY_DN3987_c0_g1_i2.p1	celegans@@@TRINITY_GG_19939_c0_g1_i2.p1,celegans@@@TRINITY_GG_19939_c0_g1_i1.p1	cinopinata@@@TRINITY_DN990_c0_g1_i1.p1,cinopinata@@@TRINITY_DN990_c0_g1_i2.p1	cjaponica@@@TRINITY_DN5495_c0_g1_i1.p1,cjaponica@@@TRINITY_DN5495_c0_g1_i2.p1	cremanei@@@TRINITY_DN8299_c0_g1_i2.p1,cremanei@@@TRINITY_DN8299_c0_g1_i4.p1,cremanei@@@TRINITY_DN8299_c0_g1_i3.p1	ppacificus@@@TRINITY_DN13443_c0_g1_i1.p1,ppacificus@@@TRINITY_DN13443_c0_g1_i2.p1
227	14	27	0.162	CEW1@@@TRINITY_DN1076_c0_g1_i1.p2	DF5006@@@TRINITY_DN4943_c0_g1_i1.p1,DF5006@@@TRINITY_DN4943_c0_g1_i3.p1,DF5006@@@TRINITY_DN4943_c0_g1_i4.p1,DF5006@@@TRINITY_DN4943_c0_g1_i5.p1	DF5012@@@TRINITY_DN4802_c0_g1_i1.p1	DF5112@@@TRINITY_DN5906_c0_g1_i1.p1	MT8872@@@TRINITY_DN525_c0_g1_i2.p1,MT8872@@@TRINITY_DN525_c0_g1_i1.p1	Y106G6E.6	cbrenneri@@@TRINITY_DN2373_c0_g1_i1.p2,cbrenneri@@@TRINITY_DN2373_c0_g1_i2.p2	cbriggsae@@@TRINITY_DN5200_c0_g1_i1.p1,cbriggsae@@@TRINITY_DN5200_c0_g1_i3.p1	celegans@@@TRINITY_DN648_c0_g1_i1.p1,celegans@@@TRINITY_DN648_c0_g1_i2.p1	celegans@@@TRINITY_GG_22651_c0_g1_i1.p1,celegans@@@TRINITY_GG_22651_c0_g1_i2.p1	cinopinata@@@TRINITY_DN3168_c0_g1_i1.p1,cinopinata@@@TRINITY_DN3168_c0_g1_i2.p1	cjaponica@@@TRINITY_DN5868_c0_g2_i1.p1,cjaponica@@@TRINITY_DN5868_c0_g2_i2.p1	cremanei@@@TRINITY_DN1690_c0_g1_i3.p1,cremanei@@@TRINITY_DN1690_c0_g1_i4.p1,cremanei@@@TRINITY_DN1690_c0_g1_i5.p1	ppacificus@@@TRINITY_DN1601_c0_g1_i1.p1,ppacificus@@@TRINITY_DN1601_c0_g1_i2.p1
228	14	27	0.155	CEW1@@@TRINITY_DN12600_c0_g1_i1.p1	DF5006@@@TRINITY_DN730_c0_g1_i1.p1	DF5012@@@TRINITY_DN669_c0_g3_i1.p1	DF5112@@@TRINITY_DN17_c0_g3_i1.p1,DF5112@@@TRINITY_DN17_c0_g3_i2.p1	MT8872@@@TRINITY_DN1389_c0_g1_i1.p1,MT8872@@@TRINITY_DN1389_c0_g1_i2.p1	T03F1.5,W09C3.6	cbrenneri@@@TRINITY_DN622_c0_g1_i1.p1,cbrenneri@@@TRINITY_DN622_c0_g1_i2.p1	cbriggsae@@@TRINITY_DN22_c0_g1_i1.p1,cbriggsae@@@TRINITY_DN22_c0_g2_i1.p1	celegans@@@TRINITY_DN1621_c0_g1_i1.p1,celegans@@@TRINITY_DN1621_c0_g1_i2.p1	celegans@@@TRINITY_GG_21741_c0_g1_i1.p1,celegans@@@TRINITY_GG_21859_c0_g1_i1.p1	cinopinata@@@TRINITY_DN736_c0_g1_i2.p1,cinopinata@@@TRINITY_DN8216_c0_g1_i1.p1	cjaponica@@@TRINITY_DN1287_c0_g1_i1.p2,cjaponica@@@TRINITY_DN1287_c0_g1_i2.p2,cjaponica@@@TRINITY_DN1287_c0_g1_i3.p2,cjaponica@@@TRINITY_DN1287_c0_g1_i4.p2	cremanei@@@TRINITY_DN127_c0_g1_i3.p1,cremanei@@@TRINITY_DN127_c0_g1_i4.p1,cremanei@@@TRINITY_DN127_c0_g1_i1.p1	ppacificus@@@TRINITY_DN2049_c0_g1_i2.p1
229	14	27	0.146	CEW1@@@TRINITY_DN2003_c0_g1_i1.p1,CEW1@@@TRINITY_DN2003_c0_g1_i2.p1	DF5006@@@TRINITY_DN2184_c1_g1_i1.p1	DF5012@@@TRINITY_DN2391_c0_g1_i2.p1,DF5012@@@TRINITY_DN2391_c0_g1_i4.p1,DF5012@@@TRINITY_DN2391_c0_g1_i1.p1,DF5012@@@TRINITY_DN2391_c0_g1_i3.p1	DF5112@@@TRINITY_DN791_c0_g1_i1.p1	MT8872@@@TRINITY_DN6170_c0_g1_i1.p1	F38A6.1a,F38A6.1b,F38A6.1c	cbrenneri@@@TRINITY_DN14220_c0_g2_i1.p1	cbriggsae@@@TRINITY_DN2110_c0_g1_i1.p1,cbriggsae@@@TRINITY_DN2110_c0_g1_i3.p1	celegans@@@TRINITY_DN13591_c0_g1_i3.p1,celegans@@@TRINITY_DN13591_c0_g1_i1.p1	celegans@@@TRINITY_GG_7050_c0_g1_i1.p1,celegans@@@TRINITY_GG_7050_c0_g1_i2.p1	cinopinata@@@TRINITY_DN23_c3_g1_i2.p1,cinopinata@@@TRINITY_DN23_c3_g1_i3.p1	cjaponica@@@TRINITY_DN3239_c0_g1_i2.p1,cjaponica@@@TRINITY_DN3239_c0_g1_i1.p1	cremanei@@@TRINITY_DN4343_c0_g1_i1.p1,cremanei@@@TRINITY_DN4343_c0_g1_i2.p1	ppacificus@@@TRINITY_DN3380_c0_g1_i2.p1,ppacificus@@@TRINITY_DN3380_c0_g1_i3.p1
230	14	27	0.137	CEW1@@@TRINITY_DN431_c0_g1_i2.p1,CEW1@@@TRINITY_DN431_c0_g1_i4.p1	DF5006@@@TRINITY_DN1343_c0_g1_i2.p1,DF5006@@@TRINITY_DN1343_c0_g1_i3.p1,DF5006@@@TRINITY_DN1343_c0_g1_i1.p1	DF5012@@@TRINITY_DN1275_c0_g1_i1.p1,DF5012@@@TRINITY_DN1275_c0_g1_i2.p1	DF5112@@@TRINITY_DN365_c0_g1_i1.p1,DF5112@@@TRINITY_DN365_c0_g1_i2.p1	MT8872@@@TRINITY_DN6575_c0_g1_i1.p1	C33H5.18a,C33H5.18b	cbrenneri@@@TRINITY_DN2474_c0_g1_i1.p1,cbrenneri@@@TRINITY_DN2474_c0_g1_i2.p1	cbriggsae@@@TRINITY_DN7375_c0_g1_i1.p1,cbriggsae@@@TRINITY_DN7375_c0_g1_i2.p1	celegans@@@TRINITY_DN2588_c0_g1_i1.p1	celegans@@@TRINITY_GG_14021_c0_g1_i1.p1	cinopinata@@@TRINITY_DN400_c0_g1_i1.p1,cinopinata@@@TRINITY_DN400_c0_g1_i3.p1	cjaponica@@@TRINITY_DN9289_c0_g1_i1.p1,cjaponica@@@TRINITY_DN9289_c0_g1_i2.p1	cremanei@@@TRINITY_DN2759_c0_g1_i1.p1,cremanei@@@TRINITY_DN2759_c0_g1_i2.p1,cremanei@@@TRINITY_DN2759_c0_g1_i4.p1	ppacificus@@@TRINITY_DN309_c0_g1_i1.p1,ppacificus@@@TRINITY_DN309_c0_g1_i4.p1
231	14	27	0.127	CEW1@@@TRINITY_DN1877_c0_g1_i1.p1	DF5006@@@TRINITY_DN6034_c0_g1_i1.p1,DF5006@@@TRINITY_DN6034_c0_g1_i2.p1	DF5012@@@TRINITY_DN5189_c0_g1_i1.p1	DF5112@@@TRINITY_DN426_c0_g1_i2.p1,DF5112@@@TRINITY_DN426_c0_g1_i4.p1,DF5112@@@TRINITY_DN426_c0_g1_i3.p1,DF5112@@@TRINITY_DN426_c0_g1_i5.p1	MT8872@@@TRINITY_DN17977_c0_g1_i1.p1	Y73E7A.3a,Y73E7A.3c	cbrenneri@@@TRINITY_DN7758_c0_g1_i5.p1,cbrenneri@@@TRINITY_DN7758_c0_g1_i7.p1,cbrenneri@@@TRINITY_DN7758_c0_g1_i1.p1	cbriggsae@@@TRINITY_DN1660_c0_g1_i2.p1,cbriggsae@@@TRINITY_DN1660_c0_g1_i3.p1	celegans@@@TRINITY_DN1800_c0_g1_i2.p1,celegans@@@TRINITY_DN1800_c0_g1_i3.p1	celegans@@@TRINITY_GG_10726_c0_g1_i2.p1,celegans@@@TRINITY_GG_10726_c0_g1_i1.p1	cinopinata@@@TRINITY_DN108_c1_g1_i1.p1	cjaponica@@@TRINITY_DN7585_c0_g1_i1.p1,cjaponica@@@TRINITY_DN7585_c0_g1_i2.p1	cremanei@@@TRINITY_DN4583_c0_g1_i4.p1,cremanei@@@TRINITY_DN4583_c0_g1_i3.p1	ppacificus@@@TRINITY_DN2329_c0_g1_i4.p1,ppacificus@@@TRINITY_DN2329_c0_g1_i2.p1
232	14	26	0.643	CEW1@@@TRINITY_DN2293_c0_g1_i1.p1,CEW1@@@TRINITY_DN2293_c0_g1_i2.p1	DF5006@@@TRINITY_DN5182_c0_g1_i1.p1	DF5012@@@TRINITY_DN717_c0_g1_i1.p1	DF5112@@@TRINITY_DN3801_c0_g1_i1.p1	MT8872@@@TRINITY_DN1645_c0_g1_i2.p1	C44C8.6	cbrenneri@@@TRINITY_DN8991_c0_g1_i1.p1,cbrenneri@@@TRINITY_DN8991_c0_g1_i2.p1	cbriggsae@@@TRINITY_DN1335_c0_g1_i1.p1,cbriggsae@@@TRINITY_DN1335_c0_g1_i2.p1	celegans@@@TRINITY_DN642_c0_g1_i1.p1,celegans@@@TRINITY_DN642_c0_g1_i2.p1	celegans@@@TRINITY_GG_2838_c0_g1_i1.p1,celegans@@@TRINITY_GG_2838_c0_g1_i2.p1	cinopinata@@@TRINITY_DN264_c0_g1_i1.p1,cinopinata@@@TRINITY_DN264_c0_g1_i2.p1,cinopinata@@@TRINITY_DN264_c0_g1_i3.p1,cinopinata@@@TRINITY_DN264_c0_g1_i5.p1	cjaponica@@@TRINITY_DN786_c0_g1_i2.p1,cjaponica@@@TRINITY_DN786_c0_g1_i3.p1	cremanei@@@TRINITY_DN19077_c0_g1_i2.p1,cremanei@@@TRINITY_DN19077_c0_g1_i3.p1,cremanei@@@TRINITY_DN19077_c0_g1_i1.p1	ppacificus@@@TRINITY_DN152_c0_g1_i2.p1,ppacificus@@@TRINITY_DN152_c0_g1_i4.p1
233	14	26	0.637	CEW1@@@TRINITY_DN1202_c0_g1_i1.p1,CEW1@@@TRINITY_DN1202_c0_g1_i2.p1	DF5006@@@TRINITY_DN7279_c0_g1_i1.p1,DF5006@@@TRINITY_DN7279_c0_g1_i2.p1,DF5006@@@TRINITY_DN7279_c0_g1_i3.p1,DF5006@@@TRINITY_DN7279_c0_g1_i4.p1	DF5012@@@TRINITY_DN242_c0_g1_i1.p1	DF5112@@@TRINITY_DN184_c0_g1_i1.p1	MT8872@@@TRINITY_DN270_c0_g1_i2.p1,MT8872@@@TRINITY_DN270_c0_g1_i3.p1	M153.1	cbrenneri@@@TRINITY_DN2278_c0_g1_i1.p1,cbrenneri@@@TRINITY_DN2278_c0_g1_i2.p1	cbriggsae@@@TRINITY_DN2065_c0_g1_i1.p1,cbriggsae@@@TRINITY_DN2065_c0_g1_i2.p1	celegans@@@TRINITY_DN2415_c0_g1_i2.p1,celegans@@@TRINITY_DN2415_c0_g1_i1.p1	celegans@@@TRINITY_GG_4713_c0_g1_i1.p1,celegans@@@TRINITY_GG_4713_c0_g1_i2.p1	cinopinata@@@TRINITY_DN543_c0_g1_i3.p1,cinopinata@@@TRINITY_DN543_c0_g1_i4.p1	cjaponica@@@TRINITY_DN1096_c0_g1_i1.p1	cremanei@@@TRINITY_DN2970_c0_g1_i1.p1,cremanei@@@TRINITY_DN2970_c0_g1_i2.p1	ppacificus@@@TRINITY_DN117_c0_g1_i1.p1,ppacificus@@@TRINITY_DN117_c0_g1_i3.p1
234	14	26	0.624	CEW1@@@TRINITY_DN19877_c0_g1_i1.p1	DF5006@@@TRINITY_DN2677_c0_g1_i1.p1	DF5012@@@TRINITY_DN4462_c0_g1_i1.p1	DF5112@@@TRINITY_DN1277_c0_g1_i1.p1,DF5112@@@TRINITY_DN1277_c0_g1_i2.p1	MT8872@@@TRINITY_DN15732_c0_g1_i1.p1	C06A8.1a,C06A8.1b	cbrenneri@@@TRINITY_DN436_c0_g1_i1.p1,cbrenneri@@@TRINITY_DN436_c0_g1_i2.p1	cbriggsae@@@TRINITY_DN1244_c0_g1_i3.p1,cbriggsae@@@TRINITY_DN1244_c0_g1_i5.p1	celegans@@@TRINITY_DN491_c0_g1_i3.p1,celegans@@@TRINITY_DN491_c0_g1_i5.p1	celegans@@@TRINITY_GG_13501_c0_g1_i1.p1,celegans@@@TRINITY_GG_13501_c0_g1_i2.p1,celegans@@@TRINITY_GG_13501_c0_g1_i3.p1,celegans@@@TRINITY_GG_13501_c0_g1_i4.p1	cinopinata@@@TRINITY_DN6552_c0_g1_i1.p1	cjaponica@@@TRINITY_DN6669_c0_g1_i2.p1,cjaponica@@@TRINITY_DN6669_c0_g1_i4.p1	cremanei@@@TRINITY_DN976_c0_g3_i1.p1,cremanei@@@TRINITY_DN976_c0_g3_i4.p1,cremanei@@@TRINITY_DN976_c0_g3_i5.p1,cremanei@@@TRINITY_DN976_c0_g3_i6.p1	ppacificus@@@TRINITY_DN2248_c0_g1_i1.p1
235	14	26	0.563	CEW1@@@TRINITY_DN4141_c0_g1_i1.p1	DF5006@@@TRINITY_DN2588_c0_g1_i1.p1,DF5006@@@TRINITY_DN2588_c0_g1_i2.p1,DF5006@@@TRINITY_DN2588_c0_g1_i3.p1	DF5012@@@TRINITY_DN1150_c0_g2_i1.p1,DF5012@@@TRINITY_DN1150_c0_g2_i2.p1,DF5012@@@TRINITY_DN1150_c0_g2_i3.p1,DF5012@@@TRINITY_DN1150_c0_g2_i4.p1	DF5112@@@TRINITY_DN623_c0_g1_i1.p1,DF5112@@@TRINITY_DN623_c0_g1_i2.p1,DF5112@@@TRINITY_DN623_c0_g1_i3.p1,DF5112@@@TRINITY_DN623_c0_g1_i4.p1	MT8872@@@TRINITY_DN7366_c0_g1_i2.p1	Y41D4A.5	cbrenneri@@@TRINITY_DN13591_c0_g1_i1.p1	cbriggsae@@@TRINITY_DN2084_c0_g1_i1.p1	celegans@@@TRINITY_DN99_c0_g1_i1.p1	celegans@@@TRINITY_GG_14755_c0_g1_i1.p1	cinopinata@@@TRINITY_DN7907_c0_g1_i1.p1	cjaponica@@@TRINITY_DN3933_c0_g1_i1.p1,cjaponica@@@TRINITY_DN3933_c0_g1_i2.p1,cjaponica@@@TRINITY_DN3933_c0_g1_i3.p1	cremanei@@@TRINITY_DN10495_c0_g1_i2.p1,cremanei@@@TRINITY_DN10495_c0_g1_i3.p1,cremanei@@@TRINITY_DN10495_c0_g1_i5.p1	ppacificus@@@TRINITY_DN11972_c0_g3_i1.p1
236	14	26	0.523	CEW1@@@TRINITY_DN6243_c0_g1_i1.p1	DF5006@@@TRINITY_DN11990_c0_g1_i1.p1	DF5012@@@TRINITY_DN785_c0_g1_i1.p1,DF5012@@@TRINITY_DN785_c0_g1_i2.p1	DF5112@@@TRINITY_DN516_c0_g1_i2.p1,DF5112@@@TRINITY_DN516_c0_g1_i1.p1	MT8872@@@TRINITY_DN17359_c0_g1_i1.p1	ZK370.3a,ZK370.3b	cbrenneri@@@TRINITY_DN1124_c0_g1_i2.p1	cbriggsae@@@TRINITY_DN1708_c0_g2_i1.p1,cbriggsae@@@TRINITY_DN1708_c0_g2_i2.p1	celegans@@@TRINITY_DN774_c0_g1_i1.p1,celegans@@@TRINITY_DN774_c0_g1_i2.p1	celegans@@@TRINITY_GG_8570_c0_g2_i1.p1,celegans@@@TRINITY_GG_8570_c0_g2_i2.p1	cinopinata@@@TRINITY_DN714_c0_g1_i1.p1,cinopinata@@@TRINITY_DN714_c0_g1_i2.p1,cinopinata@@@TRINITY_DN714_c0_g1_i3.p1	cjaponica@@@TRINITY_DN1395_c0_g1_i1.p1,cjaponica@@@TRINITY_DN1395_c0_g1_i2.p1,cjaponica@@@TRINITY_DN1395_c0_g1_i4.p1	cremanei@@@TRINITY_DN2614_c0_g1_i1.p1,cremanei@@@TRINITY_DN2614_c0_g1_i4.p1	ppacificus@@@TRINITY_DN728_c0_g1_i2.p1,ppacificus@@@TRINITY_DN728_c0_g1_i4.p1
237	14	26	0.489	CEW1@@@TRINITY_DN2226_c0_g1_i1.p1,CEW1@@@TRINITY_DN2226_c0_g1_i2.p1,CEW1@@@TRINITY_DN2226_c0_g1_i3.p1	DF5006@@@TRINITY_DN1672_c0_g1_i1.p1	DF5012@@@TRINITY_DN4604_c0_g1_i1.p1,DF5012@@@TRINITY_DN4604_c0_g1_i2.p1	DF5112@@@TRINITY_DN1779_c0_g1_i1.p1,DF5112@@@TRINITY_DN1779_c0_g1_i2.p1,DF5112@@@TRINITY_DN1779_c0_g1_i3.p1	MT8872@@@TRINITY_DN14151_c0_g1_i1.p1	F12F6.5a,F12F6.5b,F12F6.5d	cbrenneri@@@TRINITY_DN2591_c0_g1_i3.p1,cbrenneri@@@TRINITY_DN2591_c0_g1_i2.p1	cbriggsae@@@TRINITY_DN3124_c0_g1_i1.p1,cbriggsae@@@TRINITY_DN3124_c0_g1_i2.p1	celegans@@@TRINITY_DN2265_c0_g1_i1.p1,celegans@@@TRINITY_DN2265_c0_g1_i2.p1	celegans@@@TRINITY_GG_2126_c0_g1_i1.p1	cinopinata@@@TRINITY_DN10023_c0_g1_i1.p1	cjaponica@@@TRINITY_DN1917_c0_g1_i2.p1,cjaponica@@@TRINITY_DN1917_c0_g1_i3.p1	cremanei@@@TRINITY_DN7103_c0_g1_i2.p1,cremanei@@@TRINITY_DN7103_c0_g1_i1.p1	ppacificus@@@TRINITY_DN28984_c0_g1_i1.p1
238	14	26	0.423	CEW1@@@TRINITY_DN1246_c0_g1_i1.p1,CEW1@@@TRINITY_DN1246_c0_g1_i3.p1	DF5006@@@TRINITY_DN3371_c0_g1_i1.p1	DF5012@@@TRINITY_DN7005_c0_g1_i1.p1	DF5112@@@TRINITY_DN705_c0_g2_i1.p1	MT8872@@@TRINITY_DN1159_c0_g1_i1.p1,MT8872@@@TRINITY_DN1159_c0_g1_i2.p1	K02F2.1a,K02F2.1b	cbrenneri@@@TRINITY_DN2059_c0_g1_i1.p1,cbrenneri@@@TRINITY_DN2059_c0_g1_i6.p1	cbriggsae@@@TRINITY_DN1676_c0_g1_i1.p1	celegans@@@TRINITY_DN2087_c0_g1_i1.p1,celegans@@@TRINITY_DN2087_c0_g1_i2.p1,celegans@@@TRINITY_DN2087_c0_g1_i3.p1,celegans@@@TRINITY_DN2087_c0_g1_i4.p1	celegans@@@TRINITY_GG_9932_c0_g1_i1.p1,celegans@@@TRINITY_GG_9932_c0_g1_i2.p1	cinopinata@@@TRINITY_DN848_c0_g1_i1.p1,cinopinata@@@TRINITY_DN848_c0_g1_i2.p1	cjaponica@@@TRINITY_DN1401_c0_g1_i1.p1,cjaponica@@@TRINITY_DN1401_c0_g1_i3.p1	cremanei@@@TRINITY_DN2692_c0_g2_i1.p1,cremanei@@@TRINITY_DN2692_c0_g2_i2.p1	ppacificus@@@TRINITY_DN2403_c0_g1_i1.p1,ppacificus@@@TRINITY_DN2403_c0_g1_i2.p1
239	14	26	0.409	CEW1@@@TRINITY_DN1108_c0_g1_i1.p1,CEW1@@@TRINITY_DN1108_c0_g1_i3.p1	DF5006@@@TRINITY_DN2730_c0_g1_i1.p1	DF5012@@@TRINITY_DN1193_c0_g1_i2.p1,DF5012@@@TRINITY_DN1193_c0_g1_i1.p1	DF5112@@@TRINITY_DN2182_c0_g1_i1.p1,DF5112@@@TRINITY_DN2182_c0_g1_i4.p1,DF5112@@@TRINITY_DN2182_c0_g1_i5.p1	MT8872@@@TRINITY_DN1328_c0_g1_i1.p1,MT8872@@@TRINITY_DN1328_c0_g1_i2.p1	F55F8.9b,F55F8.9a	cbrenneri@@@TRINITY_DN121_c0_g1_i1.p1,cbrenneri@@@TRINITY_DN121_c0_g1_i2.p1	cbriggsae@@@TRINITY_DN3874_c0_g2_i1.p1	celegans@@@TRINITY_DN7013_c0_g2_i2.p1,celegans@@@TRINITY_DN7013_c0_g2_i3.p1	celegans@@@TRINITY_GG_23223_c1_g1_i1.p1	cinopinata@@@TRINITY_DN1144_c0_g1_i2.p1,cinopinata@@@TRINITY_DN1144_c0_g1_i1.p1	cjaponica@@@TRINITY_DN3143_c0_g2_i1.p1,cjaponica@@@TRINITY_DN3143_c0_g2_i2.p1	cremanei@@@TRINITY_DN279_c0_g1_i1.p1,cremanei@@@TRINITY_DN279_c0_g1_i2.p1	ppacificus@@@TRINITY_DN2979_c0_g1_i2.p1,ppacificus@@@TRINITY_DN2979_c0_g1_i3.p1
240	14	26	0.358	CEW1@@@TRINITY_DN1904_c0_g1_i2.p1	DF5006@@@TRINITY_DN5613_c0_g1_i1.p1	DF5012@@@TRINITY_DN1063_c0_g1_i1.p1,DF5012@@@TRINITY_DN1063_c0_g1_i4.p1,DF5012@@@TRINITY_DN1063_c0_g1_i6.p1,DF5012@@@TRINITY_DN1063_c0_g1_i7.p1,DF5012@@@TRINITY_DN1063_c0_g1_i8.p1,DF5012@@@TRINITY_DN1063_c0_g1_i5.p1,DF5012@@@TRINITY_DN1063_c0_g1_i9.p1,DF5012@@@TRINITY_DN1063_c0_g1_i3.p1,DF5012@@@TRINITY_DN1063_c0_g1_i10.p1	DF5112@@@TRINITY_DN1075_c0_g1_i1.p1	MT8872@@@TRINITY_DN17228_c0_g1_i1.p1	E04A4.4a,E04A4.4b	cbrenneri@@@TRINITY_DN1510_c0_g1_i2.p1	cbriggsae@@@TRINITY_DN897_c0_g1_i2.p1,cbriggsae@@@TRINITY_DN897_c0_g1_i1.p1	celegans@@@TRINITY_DN225_c0_g1_i1.p1	celegans@@@TRINITY_GG_14376_c0_g1_i1.p1	cinopinata@@@TRINITY_DN2640_c0_g1_i1.p1	cjaponica@@@TRINITY_DN1654_c0_g1_i1.p1,cjaponica@@@TRINITY_DN1654_c0_g1_i2.p1	cremanei@@@TRINITY_DN3069_c0_g1_i2.p1	ppacificus@@@TRINITY_DN767_c0_g1_i1.p1,ppacificus@@@TRINITY_DN767_c0_g1_i3.p1
241	14	26	0.348	CEW1@@@TRINITY_DN7457_c0_g1_i1.p1,CEW1@@@TRINITY_DN7457_c0_g1_i4.p1	DF5006@@@TRINITY_DN3458_c0_g1_i1.p1,DF5006@@@TRINITY_DN3458_c0_g1_i2.p1	DF5012@@@TRINITY_DN13085_c0_g1_i1.p1,DF5012@@@TRINITY_DN13085_c0_g1_i2.p1	DF5112@@@TRINITY_DN2765_c0_g1_i2.p1,DF5112@@@TRINITY_DN2765_c0_g1_i4.p1	MT8872@@@TRINITY_DN4656_c0_g1_i1.p1,MT8872@@@TRINITY_DN4656_c0_g1_i3.p1	Y44A6E.1a,Y44A6E.1b	cbrenneri@@@TRINITY_DN9388_c1_g1_i1.p1	cbriggsae@@@TRINITY_DN6872_c0_g1_i2.p1	celegans@@@TRINITY_DN4176_c0_g1_i1.p1,celegans@@@TRINITY_DN4176_c0_g1_i3.p1	celegans@@@TRINITY_GG_7071_c0_g1_i2.p1,celegans@@@TRINITY_GG_7071_c0_g1_i3.p1	cinopinata@@@TRINITY_DN5088_c0_g1_i1.p1,cinopinata@@@TRINITY_DN5088_c0_g1_i2.p1	cjaponica@@@TRINITY_DN4982_c0_g1_i1.p1,cjaponica@@@TRINITY_DN4982_c0_g1_i2.p1	cremanei@@@TRINITY_DN18547_c0_g1_i1.p1,cremanei@@@TRINITY_DN18547_c0_g1_i2.p1	ppacificus@@@TRINITY_DN8469_c0_g1_i2.p1,ppacificus@@@TRINITY_DN8469_c0_g1_i4.p1
242	14	26	0.308	CEW1@@@TRINITY_DN599_c0_g1_i1.p1,CEW1@@@TRINITY_DN599_c0_g1_i2.p1	DF5006@@@TRINITY_DN2413_c0_g3_i1.p1	DF5012@@@TRINITY_DN665_c0_g1_i3.p1,DF5012@@@TRINITY_DN665_c0_g1_i1.p1	DF5112@@@TRINITY_DN1667_c0_g1_i1.p1,DF5112@@@TRINITY_DN1667_c0_g1_i3.p1	MT8872@@@TRINITY_DN518_c0_g1_i2.p1,MT8872@@@TRINITY_DN518_c0_g1_i3.p1,MT8872@@@TRINITY_DN518_c0_g1_i1.p1	F56A8.7b,F56A8.7a	cbrenneri@@@TRINITY_DN4929_c0_g1_i3.p1,cbrenneri@@@TRINITY_DN4929_c0_g1_i2.p1	cbriggsae@@@TRINITY_DN1957_c1_g1_i2.p1,cbriggsae@@@TRINITY_DN1957_c1_g1_i3.p1	celegans@@@TRINITY_DN1136_c1_g2_i3.p1,celegans@@@TRINITY_DN1136_c1_g2_i1.p1	celegans@@@TRINITY_GG_8198_c0_g1_i1.p1	cinopinata@@@TRINITY_DN1256_c0_g3_i4.p1,cinopinata@@@TRINITY_DN1256_c0_g3_i2.p1	cjaponica@@@TRINITY_DN4887_c0_g1_i3.p1	cremanei@@@TRINITY_DN3616_c0_g1_i2.p1,cremanei@@@TRINITY_DN3616_c0_g1_i4.p1	ppacificus@@@TRINITY_DN1800_c0_g1_i1.p1,ppacificus@@@TRINITY_DN1800_c0_g1_i3.p1
243	14	26	0.293	CEW1@@@TRINITY_DN3357_c0_g1_i1.p1,CEW1@@@TRINITY_DN3357_c0_g1_i2.p1	DF5006@@@TRINITY_DN1121_c0_g1_i1.p1,DF5006@@@TRINITY_DN1121_c0_g1_i2.p1	DF5012@@@TRINITY_DN13804_c0_g1_i1.p1	DF5112@@@TRINITY_DN1062_c0_g1_i1.p1	MT8872@@@TRINITY_DN8417_c0_g1_i1.p1	F09G2.1a,F09G2.1b	cbrenneri@@@TRINITY_DN20052_c0_g1_i1.p1,cbrenneri@@@TRINITY_DN20052_c0_g1_i3.p1	cbriggsae@@@TRINITY_DN9144_c0_g1_i1.p1,cbriggsae@@@TRINITY_DN9144_c0_g1_i2.p1	celegans@@@TRINITY_DN11207_c0_g1_i1.p1,celegans@@@TRINITY_DN11207_c0_g1_i2.p1	celegans@@@TRINITY_GG_7399_c0_g1_i1.p1,celegans@@@TRINITY_GG_7399_c0_g1_i2.p1	cinopinata@@@TRINITY_DN5321_c0_g1_i1.p1,cinopinata@@@TRINITY_DN5321_c0_g1_i3.p1	cjaponica@@@TRINITY_DN9178_c0_g1_i1.p1	cremanei@@@TRINITY_DN14906_c0_g1_i3.p1,cremanei@@@TRINITY_DN14906_c0_g1_i4.p1	ppacificus@@@TRINITY_DN3310_c0_g1_i3.p1,ppacificus@@@TRINITY_DN3310_c0_g1_i7.p1,ppacificus@@@TRINITY_DN3310_c0_g1_i5.p1,ppacificus@@@TRINITY_DN3310_c0_g1_i2.p1
244	14	26	0.288	CEW1@@@TRINITY_DN1286_c0_g2_i3.p1,CEW1@@@TRINITY_DN1286_c0_g2_i1.p1,CEW1@@@TRINITY_DN1286_c0_g2_i2.p1	DF5006@@@TRINITY_DN1079_c0_g1_i2.p1,DF5006@@@TRINITY_DN1079_c0_g1_i1.p1	DF5012@@@TRINITY_DN2099_c0_g1_i2.p1,DF5012@@@TRINITY_DN2099_c0_g1_i3.p1,DF5012@@@TRINITY_DN2099_c0_g1_i5.p1,DF5012@@@TRINITY_DN2099_c0_g1_i6.p1,DF5012@@@TRINITY_DN2099_c0_g1_i4.p1,DF5012@@@TRINITY_DN2099_c0_g1_i1.p1	DF5112@@@TRINITY_DN600_c2_g5_i1.p1	MT8872@@@TRINITY_DN2743_c0_g1_i1.p1,MT8872@@@TRINITY_DN2743_c0_g1_i2.p1	F59B10.1	cbrenneri@@@TRINITY_DN5333_c0_g1_i1.p1	cbriggsae@@@TRINITY_DN2365_c0_g1_i1.p1	celegans@@@TRINITY_DN21852_c0_g1_i1.p1	celegans@@@TRINITY_GG_12919_c0_g1_i1.p1	cinopinata@@@TRINITY_DN23_c1_g2_i1.p1	cjaponica@@@TRINITY_DN6987_c0_g1_i1.p1	cremanei@@@TRINITY_DN1481_c0_g1_i1.p1,cremanei@@@TRINITY_DN1481_c0_g1_i2.p1	ppacificus@@@TRINITY_DN1533_c0_g1_i1.p1,ppacificus@@@TRINITY_DN1533_c0_g1_i3.p1,ppacificus@@@TRINITY_DN1533_c0_g1_i4.p1
245	14	26	0.273	CEW1@@@TRINITY_DN1442_c0_g1_i1.p1	DF5006@@@TRINITY_DN2311_c0_g1_i1.p1,DF5006@@@TRINITY_DN2311_c0_g1_i3.p1	DF5012@@@TRINITY_DN4727_c0_g1_i1.p1	DF5112@@@TRINITY_DN2095_c0_g1_i1.p1	MT8872@@@TRINITY_DN1109_c0_g1_i1.p1	K07H8.2a,K07H8.2b,K07H8.2c	cbrenneri@@@TRINITY_DN8674_c0_g1_i4.p1,cbrenneri@@@TRINITY_DN8674_c0_g1_i2.p1,cbrenneri@@@TRINITY_DN8674_c0_g1_i5.p1,cbrenneri@@@TRINITY_DN8674_c0_g1_i3.p1	cbriggsae@@@TRINITY_DN1046_c0_g2_i1.p1,cbriggsae@@@TRINITY_DN1046_c0_g2_i4.p1,cbriggsae@@@TRINITY_DN1046_c0_g2_i3.p1	celegans@@@TRINITY_DN2416_c0_g2_i1.p1,celegans@@@TRINITY_DN2416_c0_g2_i2.p1	celegans@@@TRINITY_GG_3665_c0_g1_i1.p1,celegans@@@TRINITY_GG_3665_c0_g1_i2.p1	cinopinata@@@TRINITY_DN4462_c0_g1_i1.p1	cjaponica@@@TRINITY_DN959_c0_g1_i1.p1	cremanei@@@TRINITY_DN8848_c0_g1_i1.p1,cremanei@@@TRINITY_DN8848_c0_g1_i2.p1,cremanei@@@TRINITY_DN8848_c0_g1_i4.p1	ppacificus@@@TRINITY_DN876_c0_g2_i1.p1
246	14	26	0.273	CEW1@@@TRINITY_DN6287_c0_g2_i1.p1	DF5006@@@TRINITY_DN4453_c0_g1_i2.p1,DF5006@@@TRINITY_DN4453_c0_g1_i4.p1,DF5006@@@TRINITY_DN4453_c0_g1_i1.p1,DF5006@@@TRINITY_DN4453_c0_g1_i3.p1	DF5012@@@TRINITY_DN766_c0_g1_i1.p1,DF5012@@@TRINITY_DN766_c0_g1_i2.p1	DF5112@@@TRINITY_DN3024_c0_g1_i2.p1,DF5112@@@TRINITY_DN3024_c0_g1_i1.p1	MT8872@@@TRINITY_DN3011_c0_g1_i1.p1	F10E9.6c,F10E9.6a,F10E9.6b	cbrenneri@@@TRINITY_DN1144_c0_g1_i1.p1,cbrenneri@@@TRINITY_DN1144_c0_g1_i2.p1	cbriggsae@@@TRINITY_DN1442_c0_g1_i1.p1,cbriggsae@@@TRINITY_DN1442_c0_g1_i2.p1	celegans@@@TRINITY_DN2592_c1_g1_i3.p1,celegans@@@TRINITY_DN2592_c1_g1_i2.p1	celegans@@@TRINITY_GG_8793_c0_g1_i1.p1	cinopinata@@@TRINITY_DN2806_c0_g1_i3.p1,cinopinata@@@TRINITY_DN2806_c0_g1_i4.p1,cinopinata@@@TRINITY_DN2806_c0_g1_i1.p1	cjaponica@@@TRINITY_DN1966_c0_g1_i3.p1	cremanei@@@TRINITY_DN2541_c0_g1_i1.p1	ppacificus@@@TRINITY_DN1382_c0_g1_i3.p1
247	14	26	0.233	CEW1@@@TRINITY_DN18750_c0_g1_i1.p1	DF5006@@@TRINITY_DN6518_c0_g1_i1.p1	DF5012@@@TRINITY_DN23399_c0_g1_i1.p1	DF5112@@@TRINITY_DN3647_c0_g1_i1.p1	MT8872@@@TRINITY_DN949_c0_g1_i1.p1,MT8872@@@TRINITY_DN949_c0_g1_i2.p1	Y37D8A.22b,Y37D8A.22a,Y37D8A.22c,Y37D8A.22d	cbrenneri@@@TRINITY_DN16192_c0_g2_i1.p1,cbrenneri@@@TRINITY_DN16192_c0_g2_i2.p1	cbriggsae@@@TRINITY_DN2509_c0_g2_i1.p1,cbriggsae@@@TRINITY_DN2509_c0_g2_i3.p1	celegans@@@TRINITY_DN825_c0_g1_i1.p1	celegans@@@TRINITY_GG_8809_c0_g1_i1.p1	cinopinata@@@TRINITY_DN1007_c1_g1_i5.p1,cinopinata@@@TRINITY_DN1007_c1_g1_i1.p1,cinopinata@@@TRINITY_DN1007_c1_g1_i2.p1,cinopinata@@@TRINITY_DN1007_c1_g1_i4.p1	cjaponica@@@TRINITY_DN2987_c0_g1_i11.p1,cjaponica@@@TRINITY_DN2987_c0_g1_i2.p1,cjaponica@@@TRINITY_DN2987_c0_g1_i7.p1	cremanei@@@TRINITY_DN3501_c0_g1_i1.p1,cremanei@@@TRINITY_DN3501_c0_g1_i2.p1	ppacificus@@@TRINITY_DN10622_c0_g1_i1.p1
248	14	26	0.229	CEW1@@@TRINITY_DN15221_c0_g1_i1.p1	DF5006@@@TRINITY_DN18692_c0_g1_i1.p1	DF5012@@@TRINITY_DN5338_c0_g1_i1.p1	DF5112@@@TRINITY_DN2507_c0_g1_i1.p1	MT8872@@@TRINITY_DN4717_c0_g1_i1.p1	C37C3.8a,C37C3.8c,C37C3.8b	cbrenneri@@@TRINITY_DN1690_c0_g1_i1.p1,cbrenneri@@@TRINITY_DN1690_c0_g1_i3.p1	cbriggsae@@@TRINITY_DN1301_c0_g1_i3.p1,cbriggsae@@@TRINITY_DN1301_c0_g1_i2.p1,cbriggsae@@@TRINITY_DN1301_c0_g1_i4.p1	celegans@@@TRINITY_DN306_c0_g2_i4.p1,celegans@@@TRINITY_DN306_c0_g2_i2.p1,celegans@@@TRINITY_DN306_c0_g2_i3.p1	celegans@@@TRINITY_GG_18261_c0_g1_i1.p1,celegans@@@TRINITY_GG_18261_c0_g1_i2.p1	cinopinata@@@TRINITY_DN10966_c0_g1_i3.p1,cinopinata@@@TRINITY_DN10966_c0_g1_i7.p1,cinopinata@@@TRINITY_DN10966_c0_g1_i1.p1	cjaponica@@@TRINITY_DN516_c0_g2_i1.p1	cremanei@@@TRINITY_DN18089_c0_g1_i2.p1,cremanei@@@TRINITY_DN18089_c0_g1_i1.p1,cremanei@@@TRINITY_DN18089_c0_g1_i3.p1	ppacificus@@@TRINITY_DN24354_c0_g1_i1.p1
249	14	26	0.18	CEW1@@@TRINITY_DN433_c0_g1_i1.p1,CEW1@@@TRINITY_DN433_c0_g1_i2.p1	DF5006@@@TRINITY_DN6333_c0_g1_i2.p1,DF5006@@@TRINITY_DN6333_c0_g1_i4.p1,DF5006@@@TRINITY_DN6333_c0_g1_i1.p1,DF5006@@@TRINITY_DN6333_c0_g1_i3.p1	DF5012@@@TRINITY_DN15774_c0_g1_i1.p1	DF5112@@@TRINITY_DN688_c0_g1_i1.p1,DF5112@@@TRINITY_DN688_c0_g1_i2.p1	MT8872@@@TRINITY_DN6612_c0_g1_i2.p1	K03A1.2a,K03A1.2b,K03A1.2c	cbrenneri@@@TRINITY_DN640_c0_g1_i1.p1	cbriggsae@@@TRINITY_DN1808_c0_g1_i1.p1	celegans@@@TRINITY_DN1186_c0_g2_i1.p1,celegans@@@TRINITY_DN1186_c0_g2_i2.p1	celegans@@@TRINITY_GG_5287_c0_g1_i2.p1,celegans@@@TRINITY_GG_5287_c0_g1_i1.p1	cinopinata@@@TRINITY_DN707_c0_g1_i3.p1,cinopinata@@@TRINITY_DN707_c0_g1_i4.p1	cjaponica@@@TRINITY_DN1385_c0_g1_i1.p1,cjaponica@@@TRINITY_DN1385_c0_g1_i2.p1	cremanei@@@TRINITY_DN4872_c0_g1_i2.p1	ppacificus@@@TRINITY_DN4652_c0_g2_i1.p1,ppacificus@@@TRINITY_DN4652_c0_g2_i2.p1
250	14	26	0.18	CEW1@@@TRINITY_DN679_c0_g1_i4.p1,CEW1@@@TRINITY_DN679_c0_g1_i2.p1	DF5006@@@TRINITY_DN1871_c0_g1_i1.p1	DF5012@@@TRINITY_DN6496_c0_g1_i1.p1,DF5012@@@TRINITY_DN6496_c0_g1_i2.p1	DF5112@@@TRINITY_DN4331_c0_g1_i2.p1	MT8872@@@TRINITY_DN1243_c0_g1_i1.p1,MT8872@@@TRINITY_DN1243_c0_g1_i2.p1	F32B5.6a,F32B5.6i,F32B5.6j,F32B5.6k,F32B5.6b	cbrenneri@@@TRINITY_DN2455_c0_g2_i1.p1,cbrenneri@@@TRINITY_DN2455_c0_g2_i2.p1	cbriggsae@@@TRINITY_DN6252_c1_g2_i1.p1	celegans@@@TRINITY_DN1821_c0_g2_i4.p1,celegans@@@TRINITY_DN1821_c0_g2_i1.p1,celegans@@@TRINITY_DN1821_c0_g2_i3.p1	celegans@@@TRINITY_GG_11673_c0_g1_i4.p1,celegans@@@TRINITY_GG_11673_c0_g1_i1.p1,celegans@@@TRINITY_GG_11673_c0_g1_i2.p1	cinopinata@@@TRINITY_DN8190_c0_g1_i2.p1	cjaponica@@@TRINITY_DN149_c2_g1_i1.p1	cremanei@@@TRINITY_DN2457_c0_g1_i2.p1	ppacificus@@@TRINITY_DN1029_c0_g2_i3.p1
251	14	26	0.179	CEW1@@@TRINITY_DN4194_c0_g1_i1.p1,CEW1@@@TRINITY_DN4194_c0_g1_i2.p1	DF5006@@@TRINITY_DN1578_c0_g1_i1.p1	DF5012@@@TRINITY_DN5539_c0_g1_i1.p1,DF5012@@@TRINITY_DN5539_c0_g1_i2.p1	DF5112@@@TRINITY_DN1541_c0_g1_i1.p1	MT8872@@@TRINITY_DN352_c1_g1_i1.p1	F53H10.2a,F53H10.2d,F53H10.2b	cbrenneri@@@TRINITY_DN3866_c0_g1_i1.p1	cbriggsae@@@TRINITY_DN2441_c0_g1_i1.p1	celegans@@@TRINITY_DN2279_c0_g1_i1.p1	celegans@@@TRINITY_GG_17949_c0_g1_i1.p1	cinopinata@@@TRINITY_DN1624_c0_g1_i1.p1	cjaponica@@@TRINITY_DN8625_c0_g1_i3.p1,cjaponica@@@TRINITY_DN8625_c0_g1_i1.p1	cremanei@@@TRINITY_DN6054_c0_g1_i1.p1,cremanei@@@TRINITY_DN6054_c0_g1_i3.p1,cremanei@@@TRINITY_DN6054_c0_g1_i6.p1,cremanei@@@TRINITY_DN6054_c0_g1_i7.p1	ppacificus@@@TRINITY_DN5753_c2_g1_i1.p1,ppacificus@@@TRINITY_DN5753_c2_g1_i2.p1,ppacificus@@@TRINITY_DN5753_c2_g1_i3.p1,ppacificus@@@TRINITY_DN5753_c2_g1_i4.p1,ppacificus@@@TRINITY_DN5753_c2_g1_i5.p1
252	14	26	0.179	CEW1@@@TRINITY_DN5089_c0_g1_i1.p2,CEW1@@@TRINITY_DN5089_c0_g1_i2.p2	DF5006@@@TRINITY_DN2388_c1_g1_i1.p1	DF5012@@@TRINITY_DN1744_c0_g1_i1.p1,DF5012@@@TRINITY_DN1744_c0_g1_i2.p1	DF5112@@@TRINITY_DN148_c0_g1_i2.p1,DF5112@@@TRINITY_DN148_c0_g1_i5.p1	MT8872@@@TRINITY_DN1766_c0_g1_i1.p1,MT8872@@@TRINITY_DN1766_c0_g1_i2.p1	C24B5.2a,C24B5.2c	cbrenneri@@@TRINITY_DN968_c0_g1_i4.p1,cbrenneri@@@TRINITY_DN968_c0_g1_i6.p1,cbrenneri@@@TRINITY_DN968_c0_g1_i2.p1,cbrenneri@@@TRINITY_DN968_c0_g1_i5.p1	cbriggsae@@@TRINITY_DN1433_c0_g1_i3.p1,cbriggsae@@@TRINITY_DN1433_c0_g1_i1.p1	celegans@@@TRINITY_DN407_c0_g1_i1.p1,celegans@@@TRINITY_DN407_c0_g1_i2.p1	celegans@@@TRINITY_GG_6804_c0_g1_i2.p1,celegans@@@TRINITY_GG_6804_c0_g1_i3.p1	cinopinata@@@TRINITY_DN824_c0_g1_i2.p1	cjaponica@@@TRINITY_DN1326_c0_g1_i2.p1	cremanei@@@TRINITY_DN934_c0_g1_i2.p1,cremanei@@@TRINITY_DN934_c0_g1_i1.p1	ppacificus@@@TRINITY_DN33613_c0_g1_i1.p1
253	14	26	0.178	CEW1@@@TRINITY_DN717_c0_g1_i1.p1,CEW1@@@TRINITY_DN851_c0_g1_i1.p1	DF5006@@@TRINITY_DN4082_c0_g1_i2.p1	DF5012@@@TRINITY_DN1454_c0_g1_i1.p1,DF5012@@@TRINITY_DN1454_c0_g1_i3.p1	DF5112@@@TRINITY_DN2229_c0_g1_i1.p2	MT8872@@@TRINITY_DN2229_c0_g1_i1.p1,MT8872@@@TRINITY_DN2229_c0_g1_i2.p1,MT8872@@@TRINITY_DN19763_c0_g1_i1.p1	R05H10.5b,F26E4.12,R05H10.5a	cbrenneri@@@TRINITY_DN4751_c0_g1_i1.p1,cbrenneri@@@TRINITY_DN1653_c0_g1_i2.p1,cbrenneri@@@TRINITY_DN1653_c0_g1_i1.p1	cbriggsae@@@TRINITY_DN2273_c0_g1_i1.p2,cbriggsae@@@TRINITY_DN253_c0_g1_i1.p1	celegans@@@TRINITY_DN3771_c0_g1_i1.p1,celegans@@@TRINITY_DN2183_c0_g1_i1.p1	celegans@@@TRINITY_GG_10504_c0_g1_i1.p1,celegans@@@TRINITY_GG_1580_c3_g1_i1.p1	cinopinata@@@TRINITY_DN3111_c0_g1_i1.p1,cinopinata@@@TRINITY_DN3527_c0_g1_i1.p1	cjaponica@@@TRINITY_DN3217_c0_g1_i2.p1	cremanei@@@TRINITY_DN2746_c0_g1_i1.p1	ppacificus@@@TRINITY_DN1527_c0_g1_i1.p1
254	14	26	0.158	CEW1@@@TRINITY_DN8861_c0_g1_i2.p1	DF5006@@@TRINITY_DN7298_c0_g1_i1.p1,DF5006@@@TRINITY_DN7298_c0_g1_i2.p1,DF5006@@@TRINITY_DN7298_c0_g1_i3.p1,DF5006@@@TRINITY_DN7298_c0_g1_i4.p1	DF5012@@@TRINITY_DN9283_c0_g2_i1.p1,DF5012@@@TRINITY_DN9283_c0_g2_i2.p1	DF5112@@@TRINITY_DN6148_c0_g1_i2.p1	MT8872@@@TRINITY_DN4077_c0_g1_i1.p1	F16B3.1a,F16B3.1b	cbrenneri@@@TRINITY_DN7837_c0_g1_i1.p1,cbrenneri@@@TRINITY_DN7837_c0_g1_i3.p1	cbriggsae@@@TRINITY_DN5705_c0_g4_i1.p1	celegans@@@TRINITY_DN14548_c0_g1_i1.p1,celegans@@@TRINITY_DN14548_c0_g1_i4.p1	celegans@@@TRINITY_GG_17656_c0_g1_i3.p1,celegans@@@TRINITY_GG_17656_c0_g1_i4.p1	cinopinata@@@TRINITY_DN8770_c1_g1_i1.p1	cjaponica@@@TRINITY_DN11719_c0_g1_i2.p1,cjaponica@@@TRINITY_DN11719_c0_g1_i3.p1	cremanei@@@TRINITY_DN23790_c0_g1_i1.p1,cremanei@@@TRINITY_DN23790_c0_g1_i3.p1	ppacificus@@@TRINITY_DN13285_c0_g1_i1.p1,ppacificus@@@TRINITY_DN13285_c0_g1_i5.p1,ppacificus@@@TRINITY_DN13285_c0_g1_i6.p1
255	14	26	0.135	CEW1@@@TRINITY_DN918_c0_g1_i1.p1,CEW1@@@TRINITY_DN918_c0_g1_i2.p1	DF5006@@@TRINITY_DN8183_c0_g1_i1.p1,DF5006@@@TRINITY_DN8183_c0_g1_i2.p1	DF5012@@@TRINITY_DN2963_c0_g1_i1.p1	DF5112@@@TRINITY_DN4584_c0_g2_i2.p1,DF5112@@@TRINITY_DN4584_c0_g2_i1.p1	MT8872@@@TRINITY_DN15757_c0_g1_i1.p1	F38B7.1a,F38B7.1b	cbrenneri@@@TRINITY_DN4721_c0_g1_i1.p1,cbrenneri@@@TRINITY_DN4721_c0_g1_i2.p1	cbriggsae@@@TRINITY_DN481_c0_g1_i1.p1,cbriggsae@@@TRINITY_DN481_c0_g1_i3.p1	celegans@@@TRINITY_DN828_c0_g1_i1.p1,celegans@@@TRINITY_DN828_c0_g1_i2.p1	celegans@@@TRINITY_GG_7142_c0_g1_i1.p1	cinopinata@@@TRINITY_DN2425_c1_g2_i3.p1,cinopinata@@@TRINITY_DN2425_c1_g2_i4.p1,cinopinata@@@TRINITY_DN2425_c1_g2_i2.p1,cinopinata@@@TRINITY_DN2425_c1_g2_i5.p1	cjaponica@@@TRINITY_DN1360_c0_g1_i2.p1,cjaponica@@@TRINITY_DN1360_c0_g1_i3.p1	cremanei@@@TRINITY_DN716_c0_g1_i1.p1,cremanei@@@TRINITY_DN716_c0_g1_i3.p1	ppacificus@@@TRINITY_DN3763_c0_g1_i1.p1
256	14	26	0.13	CEW1@@@TRINITY_DN3798_c0_g1_i2.p1,CEW1@@@TRINITY_DN3798_c0_g1_i5.p1	DF5006@@@TRINITY_DN2989_c0_g1_i6.p1,DF5006@@@TRINITY_DN2989_c0_g1_i7.p1	DF5012@@@TRINITY_DN7147_c0_g1_i1.p1,DF5012@@@TRINITY_DN7147_c0_g1_i4.p1,DF5012@@@TRINITY_DN12273_c0_g1_i1.p1	DF5112@@@TRINITY_DN1206_c0_g1_i3.p1,DF5112@@@TRINITY_DN1206_c0_g1_i1.p1,DF5112@@@TRINITY_DN1206_c0_g1_i2.p1	MT8872@@@TRINITY_DN2826_c0_g1_i1.p1,MT8872@@@TRINITY_DN2826_c0_g1_i4.p1	C01C4.3e,C01C4.3d,C01C4.3f,C01C4.3a	cbrenneri@@@TRINITY_DN4820_c0_g1_i3.p1	cbriggsae@@@TRINITY_DN10336_c0_g2_i3.p1	celegans@@@TRINITY_DN1348_c0_g1_i1.p1	celegans@@@TRINITY_GG_5570_c0_g1_i3.p1	cinopinata@@@TRINITY_DN2404_c0_g1_i1.p1	cjaponica@@@TRINITY_DN11533_c0_g1_i2.p1	cremanei@@@TRINITY_DN25039_c0_g1_i3.p1,cremanei@@@TRINITY_DN25039_c0_g1_i5.p1	ppacificus@@@TRINITY_DN1680_c0_g1_i2.p1,ppacificus@@@TRINITY_DN1680_c0_g1_i1.p1
257	14	26	0.128	CEW1@@@TRINITY_DN6677_c0_g1_i1.p1	DF5006@@@TRINITY_DN5155_c0_g1_i1.p1	DF5012@@@TRINITY_DN3770_c0_g1_i1.p1	DF5112@@@TRINITY_DN2024_c0_g2_i1.p1	MT8872@@@TRINITY_DN1240_c0_g1_i2.p1,MT8872@@@TRINITY_DN1240_c0_g1_i3.p1	Y37E3.11b,Y37E3.11i,Y37E3.11a	cbrenneri@@@TRINITY_DN14722_c0_g1_i2.p1,cbrenneri@@@TRINITY_DN14722_c0_g1_i4.p1	cbriggsae@@@TRINITY_DN5598_c0_g1_i3.p1	celegans@@@TRINITY_DN681_c0_g1_i1.p1,celegans@@@TRINITY_DN681_c0_g1_i2.p1,celegans@@@TRINITY_DN681_c0_g1_i4.p1	celegans@@@TRINITY_GG_10067_c0_g1_i4.p1,celegans@@@TRINITY_GG_10067_c0_g1_i1.p1	cinopinata@@@TRINITY_DN2604_c0_g1_i1.p1,cinopinata@@@TRINITY_DN2604_c0_g1_i3.p1,cinopinata@@@TRINITY_DN2604_c0_g1_i2.p1	cjaponica@@@TRINITY_DN3171_c0_g1_i1.p1,cjaponica@@@TRINITY_DN3171_c0_g1_i3.p1	cremanei@@@TRINITY_DN14406_c0_g1_i3.p1,cremanei@@@TRINITY_DN14406_c0_g1_i4.p1	ppacificus@@@TRINITY_DN1888_c0_g1_i1.p1,ppacificus@@@TRINITY_DN20191_c0_g1_i1.p1
258	14	26	0.119	CEW1@@@TRINITY_DN18257_c0_g1_i1.p1	DF5006@@@TRINITY_DN12859_c0_g1_i1.p1,DF5006@@@TRINITY_DN2155_c0_g1_i1.p1,DF5006@@@TRINITY_DN18615_c0_g1_i1.p1	DF5012@@@TRINITY_DN7357_c0_g1_i1.p1	DF5112@@@TRINITY_DN16_c0_g1_i1.p1,DF5112@@@TRINITY_DN16_c0_g1_i3.p1,DF5112@@@TRINITY_DN16_c0_g1_i2.p1	MT8872@@@TRINITY_DN21331_c0_g1_i1.p1,MT8872@@@TRINITY_DN15783_c0_g1_i1.p1,MT8872@@@TRINITY_DN20687_c0_g1_i1.p1	C56C10.6,F54H5.2a	cbrenneri@@@TRINITY_DN13534_c0_g1_i1.p1	cbriggsae@@@TRINITY_DN1315_c0_g2_i1.p1	celegans@@@TRINITY_DN2723_c0_g1_i2.p1,celegans@@@TRINITY_DN2723_c0_g1_i1.p1	celegans@@@TRINITY_GG_12701_c0_g1_i1.p1	cinopinata@@@TRINITY_DN2062_c0_g1_i1.p1,cinopinata@@@TRINITY_DN2062_c0_g1_i2.p1	cjaponica@@@TRINITY_DN807_c0_g1_i1.p1,cjaponica@@@TRINITY_DN807_c0_g3_i1.p1,cjaponica@@@TRINITY_DN807_c0_g3_i2.p1	cremanei@@@TRINITY_DN8387_c0_g2_i1.p1	ppacificus@@@TRINITY_DN15111_c1_g1_i1.p1,ppacificus@@@TRINITY_DN12862_c0_g1_i1.p1
259	14	26	0.104	CEW1@@@TRINITY_DN14555_c0_g1_i1.p1	DF5006@@@TRINITY_DN4967_c0_g4_i3.p1	DF5012@@@TRINITY_DN2428_c0_g1_i1.p1	DF5112@@@TRINITY_DN373_c0_g1_i1.p1,DF5112@@@TRINITY_DN373_c0_g1_i4.p1,DF5112@@@TRINITY_DN10161_c0_g1_i1.p1	MT8872@@@TRINITY_DN1396_c0_g1_i2.p1,MT8872@@@TRINITY_DN1396_c0_g1_i3.p1	R02E12.2a,Y53C12A.4,R02E12.2b	cbrenneri@@@TRINITY_DN4958_c0_g1_i1.p1,cbrenneri@@@TRINITY_DN7179_c0_g1_i2.p1,cbrenneri@@@TRINITY_DN7179_c0_g1_i1.p1	cbriggsae@@@TRINITY_DN3098_c0_g1_i1.p1,cbriggsae@@@TRINITY_DN2311_c0_g1_i1.p1	celegans@@@TRINITY_DN1685_c0_g1_i1.p1,celegans@@@TRINITY_DN4081_c0_g1_i1.p1	celegans@@@TRINITY_GG_11803_c1_g1_i1.p1	cinopinata@@@TRINITY_DN3774_c0_g1_i1.p1,cinopinata@@@TRINITY_DN6373_c0_g1_i1.p1	cjaponica@@@TRINITY_DN2748_c1_g1_i1.p1,cjaponica@@@TRINITY_DN1460_c0_g1_i1.p1	cremanei@@@TRINITY_DN4002_c0_g2_i1.p1,cremanei@@@TRINITY_DN3279_c0_g1_i1.p1	ppacificus@@@TRINITY_DN31258_c0_g1_i1.p1
260	14	26	0.103	CEW1@@@TRINITY_DN1154_c0_g1_i3.p1	DF5006@@@TRINITY_DN1103_c0_g1_i1.p1	DF5012@@@TRINITY_DN5517_c0_g1_i4.p2,DF5012@@@TRINITY_DN5517_c0_g1_i2.p2	DF5112@@@TRINITY_DN344_c0_g1_i1.p1,DF5112@@@TRINITY_DN260_c0_g1_i4.p1	MT8872@@@TRINITY_DN126_c0_g1_i9.p2	W02B12.3a,W02B12.2	cbrenneri@@@TRINITY_DN1947_c0_g1_i6.p1,cbrenneri@@@TRINITY_DN2936_c0_g1_i1.p1	cbriggsae@@@TRINITY_DN595_c0_g1_i3.p1,cbriggsae@@@TRINITY_DN2382_c0_g1_i1.p1	celegans@@@TRINITY_DN3504_c0_g1_i1.p1,celegans@@@TRINITY_DN698_c0_g1_i2.p1	celegans@@@TRINITY_GG_1203_c0_g1_i3.p1,celegans@@@TRINITY_GG_12038_c0_g1_i1.p1	cinopinata@@@TRINITY_DN516_c0_g1_i3.p1,cinopinata@@@TRINITY_DN1285_c0_g1_i1.p1,cinopinata@@@TRINITY_DN516_c0_g1_i6.p1	cjaponica@@@TRINITY_DN6922_c0_g1_i2.p1,cjaponica@@@TRINITY_DN241_c0_g1_i3.p1	cremanei@@@TRINITY_DN2843_c0_g1_i1.p1,cremanei@@@TRINITY_DN1254_c0_g1_i4.p1	ppacificus@@@TRINITY_DN279_c0_g1_i1.p1,ppacificus@@@TRINITY_DN1008_c0_g1_i1.p1
261	14	25	0.738	CEW1@@@TRINITY_DN2833_c0_g1_i1.p1	DF5006@@@TRINITY_DN16830_c0_g1_i1.p1	DF5012@@@TRINITY_DN1477_c5_g1_i1.p1	DF5112@@@TRINITY_DN6382_c0_g1_i1.p1	MT8872@@@TRINITY_DN20752_c0_g1_i1.p1	Y54E10A.14	cbrenneri@@@TRINITY_DN2582_c0_g1_i1.p1,cbrenneri@@@TRINITY_DN2582_c0_g1_i3.p1	cbriggsae@@@TRINITY_DN387_c0_g1_i1.p1,cbriggsae@@@TRINITY_DN387_c0_g1_i2.p1,cbriggsae@@@TRINITY_DN387_c0_g1_i3.p1,cbriggsae@@@TRINITY_DN387_c0_g1_i4.p1	celegans@@@TRINITY_DN422_c0_g1_i2.p1,celegans@@@TRINITY_DN422_c0_g1_i3.p1	celegans@@@TRINITY_GG_22877_c0_g1_i1.p1,celegans@@@TRINITY_GG_22877_c0_g1_i2.p1	cinopinata@@@TRINITY_DN229_c0_g1_i2.p1,cinopinata@@@TRINITY_DN229_c0_g1_i4.p1	cjaponica@@@TRINITY_DN1902_c0_g1_i1.p1,cjaponica@@@TRINITY_DN1902_c0_g1_i2.p1,cjaponica@@@TRINITY_DN1902_c0_g1_i3.p1,cjaponica@@@TRINITY_DN1902_c0_g1_i5.p1	cremanei@@@TRINITY_DN1927_c0_g1_i2.p1,cremanei@@@TRINITY_DN1927_c0_g1_i3.p1	ppacificus@@@TRINITY_DN7558_c0_g2_i1.p1
262	14	25	0.658	CEW1@@@TRINITY_DN889_c0_g1_i1.p1,CEW1@@@TRINITY_DN889_c0_g1_i2.p2	DF5006@@@TRINITY_DN644_c0_g1_i1.p1,DF5006@@@TRINITY_DN644_c0_g1_i2.p1,DF5006@@@TRINITY_DN644_c0_g1_i3.p1,DF5006@@@TRINITY_DN644_c0_g1_i4.p1	DF5012@@@TRINITY_DN1239_c0_g1_i1.p1,DF5012@@@TRINITY_DN1239_c0_g1_i2.p1	DF5112@@@TRINITY_DN2877_c0_g1_i1.p1	MT8872@@@TRINITY_DN14152_c0_g1_i1.p1	ZK1307.1	cbrenneri@@@TRINITY_DN988_c0_g1_i2.p1,cbrenneri@@@TRINITY_DN988_c0_g1_i3.p1,cbrenneri@@@TRINITY_DN988_c0_g1_i5.p1	cbriggsae@@@TRINITY_DN1156_c0_g1_i2.p1,cbriggsae@@@TRINITY_DN1156_c0_g1_i3.p1,cbriggsae@@@TRINITY_DN1156_c0_g1_i4.p1	celegans@@@TRINITY_DN2043_c0_g1_i1.p1,celegans@@@TRINITY_DN2043_c0_g1_i2.p1	celegans@@@TRINITY_GG_12536_c0_g1_i1.p1	cinopinata@@@TRINITY_DN3519_c0_g1_i1.p1	cjaponica@@@TRINITY_DN624_c0_g1_i1.p1,cjaponica@@@TRINITY_DN624_c0_g1_i2.p1	cremanei@@@TRINITY_DN1022_c0_g2_i1.p1	ppacificus@@@TRINITY_DN27742_c0_g1_i1.p1
263	14	25	0.653	CEW1@@@TRINITY_DN4534_c0_g1_i1.p1	DF5006@@@TRINITY_DN3542_c0_g1_i1.p1,DF5006@@@TRINITY_DN3542_c0_g1_i2.p1,DF5006@@@TRINITY_DN3542_c0_g1_i3.p1,DF5006@@@TRINITY_DN3542_c0_g1_i5.p1	DF5012@@@TRINITY_DN4874_c0_g3_i1.p1	DF5112@@@TRINITY_DN4485_c0_g1_i1.p1	MT8872@@@TRINITY_DN20466_c0_g1_i1.p1	C55B7.8	cbrenneri@@@TRINITY_DN5263_c0_g1_i1.p1,cbrenneri@@@TRINITY_DN5263_c0_g1_i2.p1	cbriggsae@@@TRINITY_DN2318_c0_g1_i1.p1	celegans@@@TRINITY_DN4175_c0_g1_i1.p1,celegans@@@TRINITY_DN4175_c0_g1_i2.p1,celegans@@@TRINITY_DN4175_c0_g1_i3.p1,celegans@@@TRINITY_DN4175_c0_g1_i4.p1,celegans@@@TRINITY_DN4175_c0_g1_i5.p1,celegans@@@TRINITY_DN4175_c0_g1_i6.p1	celegans@@@TRINITY_GG_21389_c2_g1_i1.p1	cinopinata@@@TRINITY_DN5493_c0_g1_i1.p2,cinopinata@@@TRINITY_DN5493_c0_g1_i3.p1	cjaponica@@@TRINITY_DN5749_c0_g1_i1.p1	cremanei@@@TRINITY_DN2725_c0_g1_i1.p1,cremanei@@@TRINITY_DN2725_c0_g1_i3.p1	ppacificus@@@TRINITY_DN31494_c0_g1_i1.p1
264	14	25	0.638	CEW1@@@TRINITY_DN6451_c0_g1_i1.p1	DF5006@@@TRINITY_DN426_c0_g1_i1.p1,DF5006@@@TRINITY_DN426_c0_g1_i3.p1	DF5012@@@TRINITY_DN923_c0_g1_i1.p1,DF5012@@@TRINITY_DN923_c0_g1_i2.p1,DF5012@@@TRINITY_DN923_c0_g1_i4.p1,DF5012@@@TRINITY_DN923_c0_g1_i5.p1,DF5012@@@TRINITY_DN923_c0_g1_i6.p1,DF5012@@@TRINITY_DN923_c0_g1_i8.p1	DF5112@@@TRINITY_DN3024_c1_g2_i1.p1,DF5112@@@TRINITY_DN3024_c1_g2_i2.p1	MT8872@@@TRINITY_DN4229_c0_g1_i1.p1	B0545.1a	cbrenneri@@@TRINITY_DN2517_c0_g1_i2.p1	cbriggsae@@@TRINITY_DN895_c0_g2_i5.p1	celegans@@@TRINITY_DN1077_c0_g1_i2.p1	celegans@@@TRINITY_GG_3349_c0_g1_i1.p1	cinopinata@@@TRINITY_DN1964_c0_g1_i1.p1	cjaponica@@@TRINITY_DN3296_c0_g1_i2.p1,cjaponica@@@TRINITY_DN3296_c0_g1_i1.p1	cremanei@@@TRINITY_DN595_c0_g1_i4.p1,cremanei@@@TRINITY_DN595_c0_g1_i5.p1,cremanei@@@TRINITY_DN595_c0_g1_i6.p1	ppacificus@@@TRINITY_DN1630_c0_g3_i1.p1,ppacificus@@@TRINITY_DN1630_c0_g3_i2.p1
265	14	25	0.625	CEW1@@@TRINITY_DN13752_c0_g1_i1.p1	DF5006@@@TRINITY_DN1531_c0_g1_i1.p1,DF5006@@@TRINITY_DN1531_c0_g1_i2.p1	DF5012@@@TRINITY_DN3682_c0_g1_i1.p1	DF5112@@@TRINITY_DN9784_c0_g1_i1.p1	MT8872@@@TRINITY_DN21405_c0_g1_i1.p1	C56G2.6b,C56G2.6c,C56G2.6a	cbrenneri@@@TRINITY_DN5578_c0_g1_i1.p1	cbriggsae@@@TRINITY_DN5787_c0_g1_i1.p1	celegans@@@TRINITY_DN946_c0_g1_i1.p1,celegans@@@TRINITY_DN946_c0_g1_i2.p2,celegans@@@TRINITY_DN946_c0_g1_i3.p2	celegans@@@TRINITY_GG_20729_c1_g1_i1.p1	cinopinata@@@TRINITY_DN2559_c0_g1_i1.p1,cinopinata@@@TRINITY_DN2559_c0_g1_i2.p1	cjaponica@@@TRINITY_DN2221_c0_g1_i1.p1,cjaponica@@@TRINITY_DN2221_c0_g1_i2.p1,cjaponica@@@TRINITY_DN2221_c0_g1_i3.p1	cremanei@@@TRINITY_DN6587_c0_g1_i2.p1,cremanei@@@TRINITY_DN6587_c0_g1_i3.p1	ppacificus@@@TRINITY_DN22_c0_g1_i3.p1,ppacificus@@@TRINITY_DN22_c0_g1_i4.p1,ppacificus@@@TRINITY_DN22_c0_g1_i5.p1
266	14	25	0.615	CEW1@@@TRINITY_DN2106_c0_g1_i1.p1	DF5006@@@TRINITY_DN304_c0_g1_i1.p1,DF5006@@@TRINITY_DN304_c0_g1_i2.p1	DF5012@@@TRINITY_DN9280_c0_g1_i5.p1,DF5012@@@TRINITY_DN9280_c0_g1_i6.p1,DF5012@@@TRINITY_DN9280_c0_g1_i7.p1	DF5112@@@TRINITY_DN220_c1_g2_i1.p1,DF5112@@@TRINITY_DN220_c1_g2_i3.p1	MT8872@@@TRINITY_DN1791_c0_g1_i1.p1,MT8872@@@TRINITY_DN1791_c0_g1_i2.p1	Y95B8A.10a	cbrenneri@@@TRINITY_DN4110_c0_g1_i1.p1	cbriggsae@@@TRINITY_DN1620_c0_g1_i1.p1,cbriggsae@@@TRINITY_DN1620_c0_g1_i2.p1	celegans@@@TRINITY_DN2733_c0_g1_i4.p1,celegans@@@TRINITY_DN2733_c0_g1_i7.p1	celegans@@@TRINITY_GG_22025_c0_g1_i2.p1,celegans@@@TRINITY_GG_22025_c0_g1_i1.p1	cinopinata@@@TRINITY_DN547_c0_g2_i1.p1,cinopinata@@@TRINITY_DN547_c0_g2_i2.p1	cjaponica@@@TRINITY_DN574_c0_g1_i1.p1,cjaponica@@@TRINITY_DN574_c0_g1_i2.p1	cremanei@@@TRINITY_DN2905_c0_g2_i1.p1,cremanei@@@TRINITY_DN2905_c0_g2_i2.p1	ppacificus@@@TRINITY_DN2062_c0_g1_i6.p1
267	14	25	0.578	CEW1@@@TRINITY_DN4085_c0_g1_i1.p1,CEW1@@@TRINITY_DN4085_c0_g1_i2.p1	DF5006@@@TRINITY_DN918_c0_g1_i1.p1	DF5012@@@TRINITY_DN2822_c0_g1_i1.p1,DF5012@@@TRINITY_DN2822_c0_g1_i2.p1	DF5112@@@TRINITY_DN189_c0_g1_i2.p1,DF5112@@@TRINITY_DN189_c0_g1_i3.p1,DF5112@@@TRINITY_DN189_c0_g1_i7.p1	MT8872@@@TRINITY_DN260_c0_g1_i1.p1	C26C6.2	cbrenneri@@@TRINITY_DN9945_c0_g1_i2.p1,cbrenneri@@@TRINITY_DN9945_c0_g1_i3.p1	cbriggsae@@@TRINITY_DN2969_c0_g1_i2.p1,cbriggsae@@@TRINITY_DN2969_c0_g1_i5.p1	celegans@@@TRINITY_DN5521_c0_g1_i1.p1	celegans@@@TRINITY_GG_10005_c0_g1_i1.p1,celegans@@@TRINITY_GG_22825_c0_g1_i1.p1	cinopinata@@@TRINITY_DN2860_c0_g1_i3.p1,cinopinata@@@TRINITY_DN2860_c0_g1_i4.p1	cjaponica@@@TRINITY_DN6869_c0_g1_i2.p1	cremanei@@@TRINITY_DN15974_c0_g2_i1.p1,cremanei@@@TRINITY_DN15974_c0_g2_i2.p1	ppacificus@@@TRINITY_DN3203_c2_g1_i2.p1,ppacificus@@@TRINITY_DN3203_c2_g1_i4.p1,ppacificus@@@TRINITY_DN3203_c2_g1_i5.p1
268	14	25	0.533	CEW1@@@TRINITY_DN657_c0_g1_i2.p1,CEW1@@@TRINITY_DN657_c0_g1_i3.p1,CEW1@@@TRINITY_DN657_c0_g1_i4.p1	DF5006@@@TRINITY_DN2159_c1_g1_i1.p1	DF5012@@@TRINITY_DN2910_c0_g1_i2.p1	DF5112@@@TRINITY_DN1527_c1_g1_i2.p1,DF5112@@@TRINITY_DN1527_c1_g1_i5.p1	MT8872@@@TRINITY_DN4853_c0_g1_i1.p1,MT8872@@@TRINITY_DN4853_c0_g1_i2.p1	Y53G8B.4b,Y53G8B.4a	cbrenneri@@@TRINITY_DN7669_c0_g1_i1.p1	cbriggsae@@@TRINITY_DN2404_c0_g1_i1.p1,cbriggsae@@@TRINITY_DN2404_c0_g1_i3.p1	celegans@@@TRINITY_DN3631_c0_g2_i1.p1	celegans@@@TRINITY_GG_20874_c0_g1_i1.p1	cinopinata@@@TRINITY_DN15666_c0_g1_i1.p1	cjaponica@@@TRINITY_DN6213_c0_g1_i3.p1,cjaponica@@@TRINITY_DN6213_c0_g1_i1.p1	cremanei@@@TRINITY_DN5272_c0_g1_i3.p1,cremanei@@@TRINITY_DN5272_c0_g1_i1.p1	ppacificus@@@TRINITY_DN12569_c0_g3_i1.p1,ppacificus@@@TRINITY_DN12569_c0_g3_i3.p1,ppacificus@@@TRINITY_DN12569_c0_g3_i4.p1,ppacificus@@@TRINITY_DN12569_c0_g3_i5.p1
269	14	25	0.494	CEW1@@@TRINITY_DN1143_c0_g1_i3.p1,CEW1@@@TRINITY_DN1143_c0_g1_i4.p1	DF5006@@@TRINITY_DN6722_c0_g1_i1.p1,DF5006@@@TRINITY_DN6722_c0_g1_i2.p1	DF5012@@@TRINITY_DN2130_c0_g1_i2.p1,DF5012@@@TRINITY_DN2130_c0_g1_i3.p1	DF5112@@@TRINITY_DN11455_c0_g1_i1.p1	MT8872@@@TRINITY_DN16136_c0_g1_i1.p1	F46C5.6	cbrenneri@@@TRINITY_DN4736_c0_g1_i2.p1,cbrenneri@@@TRINITY_DN4736_c0_g1_i5.p1,cbrenneri@@@TRINITY_DN4736_c0_g1_i6.p1	cbriggsae@@@TRINITY_DN9754_c0_g1_i1.p1,cbriggsae@@@TRINITY_DN9754_c0_g1_i2.p1	celegans@@@TRINITY_DN7842_c0_g1_i2.p1,celegans@@@TRINITY_DN7842_c0_g1_i4.p1	celegans@@@TRINITY_GG_12431_c0_g1_i1.p1,celegans@@@TRINITY_GG_12431_c0_g1_i2.p1	cinopinata@@@TRINITY_DN4170_c0_g1_i5.p1,cinopinata@@@TRINITY_DN4170_c0_g1_i6.p1	cjaponica@@@TRINITY_DN7223_c0_g1_i1.p1,cjaponica@@@TRINITY_DN7223_c0_g1_i3.p1,cjaponica@@@TRINITY_DN7223_c0_g1_i7.p1	cremanei@@@TRINITY_DN12454_c0_g1_i2.p1	ppacificus@@@TRINITY_DN16458_c0_g1_i3.p1
270	14	25	0.474	CEW1@@@TRINITY_DN292_c0_g1_i1.p1	DF5006@@@TRINITY_DN56_c0_g1_i1.p1,DF5006@@@TRINITY_DN56_c0_g1_i2.p1	DF5012@@@TRINITY_DN809_c0_g1_i1.p1,DF5012@@@TRINITY_DN809_c0_g1_i2.p1,DF5012@@@TRINITY_DN809_c0_g1_i3.p1,DF5012@@@TRINITY_DN809_c0_g1_i5.p1	DF5112@@@TRINITY_DN447_c1_g1_i1.p1,DF5112@@@TRINITY_DN447_c1_g1_i2.p1,DF5112@@@TRINITY_DN447_c1_g1_i3.p1	MT8872@@@TRINITY_DN1193_c0_g2_i1.p1,MT8872@@@TRINITY_DN1193_c0_g2_i2.p1	F46E10.1a,F46E10.1b,F46E10.1c	cbrenneri@@@TRINITY_DN7431_c0_g1_i1.p1	cbriggsae@@@TRINITY_DN5021_c0_g1_i1.p1	celegans@@@TRINITY_DN5739_c0_g2_i1.p1	celegans@@@TRINITY_GG_7765_c1_g1_i1.p1	cinopinata@@@TRINITY_DN3370_c0_g1_i1.p1	cjaponica@@@TRINITY_DN1796_c0_g1_i1.p1	cremanei@@@TRINITY_DN5493_c0_g1_i1.p1,cremanei@@@TRINITY_DN5493_c0_g1_i2.p1	ppacificus@@@TRINITY_DN16291_c0_g2_i1.p1,ppacificus@@@TRINITY_DN16291_c0_g2_i2.p1
271	14	25	0.464	CEW1@@@TRINITY_DN3061_c0_g1_i1.p1	DF5006@@@TRINITY_DN3152_c0_g1_i1.p1	DF5012@@@TRINITY_DN2337_c0_g1_i1.p1	DF5112@@@TRINITY_DN292_c1_g1_i1.p1	MT8872@@@TRINITY_DN1128_c0_g1_i1.p1	F11A10.4a,F11A10.4b	cbrenneri@@@TRINITY_DN1138_c0_g1_i1.p1,cbrenneri@@@TRINITY_DN1138_c0_g1_i2.p1	cbriggsae@@@TRINITY_DN789_c0_g1_i1.p1,cbriggsae@@@TRINITY_DN789_c0_g1_i2.p1,cbriggsae@@@TRINITY_DN789_c0_g1_i3.p1	celegans@@@TRINITY_DN749_c0_g1_i1.p1,celegans@@@TRINITY_DN749_c0_g1_i2.p1	celegans@@@TRINITY_GG_2975_c0_g1_i1.p1,celegans@@@TRINITY_GG_2975_c0_g1_i2.p1	cinopinata@@@TRINITY_DN1690_c0_g1_i1.p1,cinopinata@@@TRINITY_DN1690_c0_g1_i2.p1	cjaponica@@@TRINITY_DN1143_c0_g1_i2.p1,cjaponica@@@TRINITY_DN1143_c0_g1_i4.p1	cremanei@@@TRINITY_DN5391_c0_g1_i1.p1,cremanei@@@TRINITY_DN5391_c0_g1_i2.p1,cremanei@@@TRINITY_DN5391_c0_g1_i4.p1,cremanei@@@TRINITY_DN5391_c0_g1_i5.p1	ppacificus@@@TRINITY_DN1622_c0_g1_i1.p1
272	14	25	0.423	CEW1@@@TRINITY_DN776_c0_g1_i2.p1,CEW1@@@TRINITY_DN776_c0_g1_i4.p1,CEW1@@@TRINITY_DN776_c0_g1_i5.p1	DF5006@@@TRINITY_DN803_c0_g1_i1.p1,DF5006@@@TRINITY_DN803_c0_g1_i2.p1	DF5012@@@TRINITY_DN1558_c0_g1_i1.p1,DF5012@@@TRINITY_DN1558_c0_g1_i2.p1,DF5012@@@TRINITY_DN1558_c0_g1_i3.p1	DF5112@@@TRINITY_DN1411_c0_g1_i1.p1,DF5112@@@TRINITY_DN1411_c0_g1_i2.p1	MT8872@@@TRINITY_DN2697_c0_g1_i1.p1	C27A12.8	cbrenneri@@@TRINITY_DN5135_c0_g1_i1.p1,cbrenneri@@@TRINITY_DN5135_c0_g1_i2.p1	cbriggsae@@@TRINITY_DN1588_c0_g1_i1.p1,cbriggsae@@@TRINITY_DN1588_c0_g1_i2.p1	celegans@@@TRINITY_DN180_c0_g2_i2.p1,celegans@@@TRINITY_DN180_c0_g2_i1.p1	celegans@@@TRINITY_GG_21826_c0_g1_i1.p1	cinopinata@@@TRINITY_DN491_c0_g1_i2.p1	cjaponica@@@TRINITY_DN185_c0_g1_i1.p1,cjaponica@@@TRINITY_DN185_c0_g1_i3.p1	cremanei@@@TRINITY_DN1568_c0_g1_i6.p2,cremanei@@@TRINITY_DN1568_c0_g1_i9.p1	ppacificus@@@TRINITY_DN31562_c0_g1_i1.p1
273	14	25	0.391	CEW1@@@TRINITY_DN7005_c0_g1_i2.p1	DF5006@@@TRINITY_DN47_c0_g1_i3.p2,DF5006@@@TRINITY_DN47_c0_g1_i2.p1,DF5006@@@TRINITY_DN47_c0_g1_i4.p1,DF5006@@@TRINITY_DN47_c0_g1_i5.p1	DF5012@@@TRINITY_DN23979_c0_g1_i1.p1	DF5112@@@TRINITY_DN9914_c0_g1_i1.p1	MT8872@@@TRINITY_DN18168_c0_g1_i1.p1	C39H7.1,Y38H8A.3	cbrenneri@@@TRINITY_DN4089_c0_g1_i1.p1,cbrenneri@@@TRINITY_DN25513_c0_g1_i1.p2	cbriggsae@@@TRINITY_DN19195_c0_g1_i1.p2	celegans@@@TRINITY_DN2671_c0_g1_i1.p1,celegans@@@TRINITY_DN2671_c0_g1_i2.p1	celegans@@@TRINITY_GG_2723_c0_g1_i1.p1,celegans@@@TRINITY_GG_3823_c0_g1_i1.p2	cinopinata@@@TRINITY_DN501_c0_g1_i1.p1,cinopinata@@@TRINITY_DN501_c0_g1_i3.p1,cinopinata@@@TRINITY_DN12278_c0_g2_i8.p1	cjaponica@@@TRINITY_DN898_c0_g1_i2.p1,cjaponica@@@TRINITY_DN898_c0_g1_i4.p1	cremanei@@@TRINITY_DN12116_c0_g1_i1.p1,cremanei@@@TRINITY_DN12116_c0_g3_i1.p1	ppacificus@@@TRINITY_DN31899_c0_g1_i1.p1
274	14	25	0.377	CEW1@@@TRINITY_DN16617_c0_g1_i1.p1	DF5006@@@TRINITY_DN220_c0_g1_i1.p1	DF5012@@@TRINITY_DN17707_c0_g1_i1.p1,DF5012@@@TRINITY_DN21465_c0_g1_i1.p1	DF5112@@@TRINITY_DN242_c0_g1_i2.p1,DF5112@@@TRINITY_DN242_c0_g1_i3.p1	MT8872@@@TRINITY_DN2573_c0_g1_i1.p1	Y39G8B.1a,Y39G8B.1b	cbrenneri@@@TRINITY_DN2735_c0_g1_i1.p1,cbrenneri@@@TRINITY_DN2735_c0_g1_i2.p1,cbrenneri@@@TRINITY_DN2735_c0_g1_i4.p1	cbriggsae@@@TRINITY_DN498_c0_g1_i1.p1	celegans@@@TRINITY_DN328_c0_g1_i3.p2,celegans@@@TRINITY_DN328_c0_g1_i1.p2	celegans@@@TRINITY_GG_11905_c0_g1_i2.p2,celegans@@@TRINITY_GG_11905_c0_g1_i1.p2	cinopinata@@@TRINITY_DN537_c0_g1_i1.p1,cinopinata@@@TRINITY_DN537_c0_g1_i2.p1	cjaponica@@@TRINITY_DN712_c0_g1_i2.p1,cjaponica@@@TRINITY_DN712_c0_g1_i4.p1,cjaponica@@@TRINITY_DN712_c0_g1_i3.p1,cjaponica@@@TRINITY_DN712_c0_g1_i8.p1	cremanei@@@TRINITY_DN1813_c0_g1_i1.p1	ppacificus@@@TRINITY_DN20619_c0_g2_i1.p2
275	14	25	0.355	CEW1@@@TRINITY_DN4207_c1_g1_i2.p1	DF5006@@@TRINITY_DN1976_c0_g2_i1.p1,DF5006@@@TRINITY_DN1976_c0_g2_i2.p1	DF5012@@@TRINITY_DN15725_c0_g1_i1.p1	DF5112@@@TRINITY_DN1327_c0_g1_i1.p1,DF5112@@@TRINITY_DN1327_c0_g1_i2.p1	MT8872@@@TRINITY_DN547_c0_g1_i1.p1,MT8872@@@TRINITY_DN547_c0_g1_i2.p1,MT8872@@@TRINITY_DN547_c0_g1_i3.p1	C08B6.7a,C08B6.7b,C08B6.7c	cbrenneri@@@TRINITY_DN819_c0_g1_i1.p1	cbriggsae@@@TRINITY_DN203_c0_g1_i1.p1,cbriggsae@@@TRINITY_DN203_c0_g1_i2.p1	celegans@@@TRINITY_DN2327_c0_g1_i1.p1	celegans@@@TRINITY_GG_18745_c0_g1_i1.p1	cinopinata@@@TRINITY_DN3569_c0_g1_i1.p1	cjaponica@@@TRINITY_DN8320_c0_g1_i1.p1,cjaponica@@@TRINITY_DN8320_c0_g1_i3.p1,cjaponica@@@TRINITY_DN8320_c0_g1_i2.p1,cjaponica@@@TRINITY_DN8320_c0_g1_i4.p1	cremanei@@@TRINITY_DN11366_c0_g1_i1.p1	ppacificus@@@TRINITY_DN22338_c0_g2_i1.p1,ppacificus@@@TRINITY_DN22338_c0_g2_i3.p1
276	14	25	0.312	CEW1@@@TRINITY_DN1289_c0_g2_i1.p1,CEW1@@@TRINITY_DN1289_c0_g2_i3.p1,CEW1@@@TRINITY_DN1289_c0_g2_i4.p1,CEW1@@@TRINITY_DN1289_c0_g2_i5.p1	DF5006@@@TRINITY_DN938_c0_g1_i3.p1,DF5006@@@TRINITY_DN938_c0_g1_i2.p1	DF5012@@@TRINITY_DN2994_c0_g1_i2.p1,DF5012@@@TRINITY_DN2994_c0_g1_i1.p1	DF5112@@@TRINITY_DN3357_c0_g1_i10.p1	MT8872@@@TRINITY_DN969_c0_g1_i2.p1,MT8872@@@TRINITY_DN969_c0_g1_i4.p1	Y59A8B.21b,Y59A8B.21a	cbrenneri@@@TRINITY_DN586_c0_g1_i2.p1,cbrenneri@@@TRINITY_DN586_c0_g1_i1.p1	cbriggsae@@@TRINITY_DN3610_c0_g1_i2.p1	celegans@@@TRINITY_DN4989_c0_g1_i1.p1	celegans@@@TRINITY_GG_5769_c0_g1_i1.p1	cinopinata@@@TRINITY_DN2339_c0_g1_i2.p1,cinopinata@@@TRINITY_DN2339_c0_g1_i1.p1	cjaponica@@@TRINITY_DN945_c0_g1_i2.p1,cjaponica@@@TRINITY_DN945_c0_g1_i1.p1	cremanei@@@TRINITY_DN9636_c0_g1_i3.p1,cremanei@@@TRINITY_DN9636_c0_g1_i1.p1	ppacificus@@@TRINITY_DN739_c0_g1_i2.p1
277	14	25	0.312	CEW1@@@TRINITY_DN1648_c0_g1_i1.p1,CEW1@@@TRINITY_DN1648_c0_g1_i2.p1	DF5006@@@TRINITY_DN478_c0_g1_i1.p1,DF5006@@@TRINITY_DN478_c0_g1_i2.p1	DF5012@@@TRINITY_DN276_c0_g1_i3.p1,DF5012@@@TRINITY_DN276_c0_g1_i1.p1,DF5012@@@TRINITY_DN276_c0_g1_i4.p1	DF5112@@@TRINITY_DN3053_c0_g1_i1.p1,DF5112@@@TRINITY_DN3053_c0_g1_i2.p1	MT8872@@@TRINITY_DN415_c0_g1_i2.p1,MT8872@@@TRINITY_DN415_c0_g1_i4.p1,MT8872@@@TRINITY_DN415_c0_g1_i5.p1	Y59A8B.10a,Y59A8B.10d	cbrenneri@@@TRINITY_DN624_c0_g1_i1.p1,cbrenneri@@@TRINITY_DN624_c0_g1_i2.p1	cbriggsae@@@TRINITY_DN1319_c0_g1_i1.p1,cbriggsae@@@TRINITY_DN1319_c0_g1_i2.p1	celegans@@@TRINITY_DN676_c0_g1_i1.p1	celegans@@@TRINITY_GG_18824_c0_g1_i1.p1	cinopinata@@@TRINITY_DN7203_c0_g2_i2.p1,cinopinata@@@TRINITY_DN7203_c0_g2_i1.p1	cjaponica@@@TRINITY_DN5257_c1_g1_i1.p1	cremanei@@@TRINITY_DN11642_c0_g1_i5.p1	ppacificus@@@TRINITY_DN1513_c0_g1_i3.p1
278	14	25	0.237	CEW1@@@TRINITY_DN336_c0_g1_i4.p1	DF5006@@@TRINITY_DN632_c0_g1_i3.p1,DF5006@@@TRINITY_DN632_c0_g1_i1.p1	DF5012@@@TRINITY_DN1141_c0_g1_i1.p1,DF5012@@@TRINITY_DN1141_c0_g1_i2.p1	DF5112@@@TRINITY_DN409_c0_g1_i3.p1,DF5112@@@TRINITY_DN409_c0_g1_i5.p1	MT8872@@@TRINITY_DN169_c0_g1_i1.p1,MT8872@@@TRINITY_DN169_c0_g1_i2.p1	K10D6.2b,K10D6.2a	cbrenneri@@@TRINITY_DN1523_c0_g1_i1.p1,cbrenneri@@@TRINITY_DN1523_c0_g1_i2.p1	cbriggsae@@@TRINITY_DN1406_c0_g1_i3.p1	celegans@@@TRINITY_DN1050_c0_g1_i3.p1,celegans@@@TRINITY_DN1050_c0_g1_i2.p1	celegans@@@TRINITY_GG_17282_c0_g1_i1.p1,celegans@@@TRINITY_GG_17282_c0_g1_i2.p1	cinopinata@@@TRINITY_DN2865_c0_g1_i3.p1,cinopinata@@@TRINITY_DN2865_c0_g1_i1.p1	cjaponica@@@TRINITY_DN531_c0_g1_i7.p1,cjaponica@@@TRINITY_DN531_c0_g1_i4.p1	cremanei@@@TRINITY_DN2303_c0_g1_i8.p1,cremanei@@@TRINITY_DN2303_c0_g1_i10.p1	ppacificus@@@TRINITY_DN2362_c0_g2_i1.p1
279	14	25	0.229	CEW1@@@TRINITY_DN1_c1_g1_i1.p1,CEW1@@@TRINITY_DN1_c1_g1_i2.p1	DF5006@@@TRINITY_DN111_c0_g1_i11.p1,DF5006@@@TRINITY_DN111_c0_g1_i6.p1	DF5012@@@TRINITY_DN51_c0_g1_i6.p1,DF5012@@@TRINITY_DN51_c0_g1_i7.p1	DF5112@@@TRINITY_DN83_c0_g3_i1.p1	MT8872@@@TRINITY_DN823_c0_g1_i2.p1,MT8872@@@TRINITY_DN823_c0_g1_i4.p1	F11C3.3	cbrenneri@@@TRINITY_DN353_c0_g1_i3.p1,cbrenneri@@@TRINITY_DN353_c0_g1_i6.p1,cbrenneri@@@TRINITY_DN353_c0_g1_i2.p1	cbriggsae@@@TRINITY_DN445_c0_g1_i2.p1,cbriggsae@@@TRINITY_DN445_c0_g1_i4.p1	celegans@@@TRINITY_DN290_c0_g1_i3.p1	celegans@@@TRINITY_GG_22168_c0_g1_i1.p1	cinopinata@@@TRINITY_DN1035_c0_g1_i1.p1,cinopinata@@@TRINITY_DN1035_c0_g1_i4.p1	cjaponica@@@TRINITY_DN1013_c0_g4_i3.p1,cjaponica@@@TRINITY_DN1013_c0_g4_i2.p1	cremanei@@@TRINITY_DN108_c1_g1_i1.p1	ppacificus@@@TRINITY_DN1165_c0_g1_i1.p1,ppacificus@@@TRINITY_DN1165_c0_g1_i4.p1,ppacificus@@@TRINITY_DN1165_c0_g1_i6.p1
280	14	25	0.212	CEW1@@@TRINITY_DN214_c0_g2_i1.p1,CEW1@@@TRINITY_DN214_c0_g1_i1.p1	DF5006@@@TRINITY_DN106_c0_g1_i1.p1,DF5006@@@TRINITY_DN106_c0_g1_i2.p1	DF5012@@@TRINITY_DN752_c0_g1_i1.p1,DF5012@@@TRINITY_DN6783_c0_g1_i1.p1	DF5112@@@TRINITY_DN11420_c0_g1_i1.p1	MT8872@@@TRINITY_DN51_c0_g1_i1.p1,MT8872@@@TRINITY_DN51_c0_g2_i1.p1	C17F4.7,Y51F10.7	cbrenneri@@@TRINITY_DN1953_c0_g1_i1.p1,cbrenneri@@@TRINITY_DN1953_c0_g1_i2.p1	cbriggsae@@@TRINITY_DN4882_c0_g1_i1.p1	celegans@@@TRINITY_DN17978_c0_g1_i1.p1,celegans@@@TRINITY_DN16235_c0_g1_i1.p2	celegans@@@TRINITY_GG_12228_c0_g1_i1.p1,celegans@@@TRINITY_GG_1986_c0_g1_i1.p1,celegans@@@TRINITY_GG_21571_c3_g1_i1.p2	cinopinata@@@TRINITY_DN1486_c0_g1_i2.p1,cinopinata@@@TRINITY_DN1356_c0_g1_i2.p1	cjaponica@@@TRINITY_DN23515_c0_g1_i1.p1	cremanei@@@TRINITY_DN28925_c0_g1_i1.p1	ppacificus@@@TRINITY_DN9183_c0_g1_i2.p2,ppacificus@@@TRINITY_DN8854_c0_g1_i2.p1
281	14	25	0.206	CEW1@@@TRINITY_DN1121_c0_g1_i7.p1,CEW1@@@TRINITY_DN1121_c0_g1_i5.p1,CEW1@@@TRINITY_DN1121_c0_g1_i6.p1,CEW1@@@TRINITY_DN1121_c0_g1_i8.p1,CEW1@@@TRINITY_DN1121_c0_g1_i9.p1	DF5006@@@TRINITY_DN3920_c0_g2_i3.p1,DF5006@@@TRINITY_DN3920_c0_g2_i4.p1	DF5012@@@TRINITY_DN3623_c0_g1_i3.p1,DF5012@@@TRINITY_DN3623_c0_g1_i2.p1	DF5112@@@TRINITY_DN2744_c0_g1_i4.p1	MT8872@@@TRINITY_DN2757_c0_g1_i5.p1,MT8872@@@TRINITY_DN2757_c0_g1_i3.p1	C16E9.4a	cbrenneri@@@TRINITY_DN4233_c0_g1_i3.p1,cbrenneri@@@TRINITY_DN4233_c0_g1_i14.p1	cbriggsae@@@TRINITY_DN4547_c0_g1_i4.p1	celegans@@@TRINITY_DN3175_c0_g1_i4.p1,celegans@@@TRINITY_DN3175_c0_g1_i3.p1	celegans@@@TRINITY_GG_16169_c0_g1_i1.p1,celegans@@@TRINITY_GG_16169_c0_g1_i2.p1	cinopinata@@@TRINITY_DN1533_c0_g4_i2.p1	cjaponica@@@TRINITY_DN651_c0_g2_i3.p1	cremanei@@@TRINITY_DN5142_c0_g1_i4.p1,cremanei@@@TRINITY_DN5142_c0_g1_i2.p1	ppacificus@@@TRINITY_DN2195_c0_g1_i2.p1
282	14	25	0.205	CEW1@@@TRINITY_DN20242_c0_g1_i1.p1,CEW1@@@TRINITY_DN11442_c0_g1_i1.p1	DF5006@@@TRINITY_DN4417_c1_g2_i1.p1,DF5006@@@TRINITY_DN4417_c1_g2_i3.p1,DF5006@@@TRINITY_DN4417_c1_g2_i4.p1,DF5006@@@TRINITY_DN4417_c1_g2_i5.p1	DF5012@@@TRINITY_DN17636_c0_g1_i1.p1	DF5112@@@TRINITY_DN3178_c2_g2_i1.p1,DF5112@@@TRINITY_DN11075_c0_g1_i1.p1	MT8872@@@TRINITY_DN5784_c0_g1_i1.p1	Y38C1AA.3a,Y38C1AA.3b,Y57G11C.47	cbrenneri@@@TRINITY_DN743_c0_g1_i1.p1,cbrenneri@@@TRINITY_DN743_c0_g1_i2.p1	cbriggsae@@@TRINITY_DN1456_c0_g1_i1.p1	celegans@@@TRINITY_DN1274_c0_g1_i1.p1,celegans@@@TRINITY_DN1274_c0_g1_i2.p1	celegans@@@TRINITY_GG_3351_c0_g1_i1.p1	cinopinata@@@TRINITY_DN790_c1_g1_i1.p1	cjaponica@@@TRINITY_DN1476_c0_g1_i1.p1,cjaponica@@@TRINITY_DN1476_c0_g1_i2.p1,cjaponica@@@TRINITY_DN1476_c0_g1_i3.p1	cremanei@@@TRINITY_DN527_c0_g1_i2.p1	ppacificus@@@TRINITY_DN3109_c0_g1_i1.p1
283	14	25	0.203	CEW1@@@TRINITY_DN14503_c0_g1_i1.p1	DF5006@@@TRINITY_DN7115_c0_g2_i1.p1	DF5012@@@TRINITY_DN18355_c0_g1_i1.p1,DF5012@@@TRINITY_DN18379_c0_g1_i1.p1	DF5112@@@TRINITY_DN9791_c0_g1_i1.p1,DF5112@@@TRINITY_DN10501_c0_g1_i1.p1	MT8872@@@TRINITY_DN5305_c0_g1_i1.p2	F07D10.1,T22F3.4a	cbrenneri@@@TRINITY_DN69_c0_g2_i1.p2,cbrenneri@@@TRINITY_DN69_c0_g1_i1.p1	cbriggsae@@@TRINITY_DN207_c0_g1_i2.p1,cbriggsae@@@TRINITY_DN207_c0_g1_i1.p1	celegans@@@TRINITY_DN136_c0_g2_i1.p1,celegans@@@TRINITY_DN136_c0_g1_i1.p1	celegans@@@TRINITY_GG_16297_c0_g1_i1.p1,celegans@@@TRINITY_GG_19012_c0_g1_i1.p1,celegans@@@TRINITY_GG_7424_c0_g1_i1.p1	cinopinata@@@TRINITY_DN2171_c0_g1_i2.p1,cinopinata@@@TRINITY_DN9294_c0_g1_i1.p1	cjaponica@@@TRINITY_DN56_c0_g2_i1.p2,cjaponica@@@TRINITY_DN56_c0_g1_i1.p2	cremanei@@@TRINITY_DN318_c0_g1_i3.p2,cremanei@@@TRINITY_DN318_c0_g1_i1.p1	ppacificus@@@TRINITY_DN5731_c0_g1_i1.p1
284	14	25	0.2	CEW1@@@TRINITY_DN477_c0_g1_i2.p1	DF5006@@@TRINITY_DN4299_c0_g1_i1.p1,DF5006@@@TRINITY_DN4299_c0_g1_i2.p1	DF5012@@@TRINITY_DN3776_c0_g1_i1.p1,DF5012@@@TRINITY_DN3776_c0_g1_i2.p1,DF5012@@@TRINITY_DN507_c0_g1_i7.p1	DF5112@@@TRINITY_DN1757_c0_g1_i3.p1	MT8872@@@TRINITY_DN3811_c1_g1_i1.p1	F18E3.7a,C47A10.5a	cbrenneri@@@TRINITY_DN9720_c0_g1_i3.p1,cbrenneri@@@TRINITY_DN9854_c0_g1_i1.p1	cbriggsae@@@TRINITY_DN4862_c0_g1_i2.p1,cbriggsae@@@TRINITY_DN25873_c0_g1_i1.p1	celegans@@@TRINITY_DN747_c0_g1_i5.p1,celegans@@@TRINITY_DN8794_c0_g1_i1.p1	celegans@@@TRINITY_GG_17466_c0_g1_i1.p1,celegans@@@TRINITY_GG_18832_c0_g1_i1.p1	cinopinata@@@TRINITY_DN6411_c0_g1_i1.p1	cjaponica@@@TRINITY_DN7845_c0_g2_i3.p1,cjaponica@@@TRINITY_DN7461_c5_g1_i1.p1	cremanei@@@TRINITY_DN126_c0_g1_i2.p1,cremanei@@@TRINITY_DN5501_c0_g1_i1.p1,cremanei@@@TRINITY_DN5501_c0_g1_i2.p1	ppacificus@@@TRINITY_DN2001_c0_g1_i2.p1
285	14	25	0.198	CEW1@@@TRINITY_DN2123_c0_g1_i2.p1,CEW1@@@TRINITY_DN2123_c0_g1_i6.p1	DF5006@@@TRINITY_DN7572_c0_g1_i2.p1,DF5006@@@TRINITY_DN7572_c0_g1_i6.p1	DF5012@@@TRINITY_DN17624_c0_g1_i1.p1	DF5112@@@TRINITY_DN7099_c0_g1_i1.p1,DF5112@@@TRINITY_DN330_c0_g2_i1.p1,DF5112@@@TRINITY_DN330_c0_g2_i2.p1	MT8872@@@TRINITY_DN640_c0_g1_i1.p1	F55A11.4a,F17E5.2	cbrenneri@@@TRINITY_DN7147_c0_g1_i2.p1,cbrenneri@@@TRINITY_DN11819_c0_g1_i1.p1	cbriggsae@@@TRINITY_DN12733_c0_g1_i1.p1,cbriggsae@@@TRINITY_DN1827_c0_g1_i1.p1	celegans@@@TRINITY_DN2303_c0_g2_i1.p1,celegans@@@TRINITY_DN4563_c0_g1_i1.p1	celegans@@@TRINITY_GG_6490_c0_g1_i1.p1,celegans@@@TRINITY_GG_4144_c0_g1_i1.p1	cinopinata@@@TRINITY_DN6491_c0_g1_i1.p1,cinopinata@@@TRINITY_DN3186_c0_g1_i6.p1	cjaponica@@@TRINITY_DN262_c2_g1_i2.p1	cremanei@@@TRINITY_DN6781_c0_g2_i1.p1,cremanei@@@TRINITY_DN7735_c0_g1_i1.p1	ppacificus@@@TRINITY_DN6573_c0_g1_i1.p1
286	14	25	0.169	CEW1@@@TRINITY_DN2609_c0_g1_i1.p1,CEW1@@@TRINITY_DN2609_c0_g1_i2.p1	DF5006@@@TRINITY_DN3981_c0_g1_i1.p1	DF5012@@@TRINITY_DN3059_c0_g2_i1.p1,DF5012@@@TRINITY_DN3059_c0_g2_i2.p1	DF5112@@@TRINITY_DN1028_c1_g1_i1.p1,DF5112@@@TRINITY_DN1028_c1_g1_i2.p1	MT8872@@@TRINITY_DN3152_c0_g1_i1.p1	F59G1.1a,F59G1.1b,F59G1.1d,F20B4.6	cbrenneri@@@TRINITY_DN5998_c0_g1_i1.p1,cbrenneri@@@TRINITY_DN3556_c0_g1_i1.p1	cbriggsae@@@TRINITY_DN2912_c0_g1_i1.p1	celegans@@@TRINITY_DN3736_c0_g1_i1.p1	celegans@@@TRINITY_GG_1650_c0_g1_i1.p1,celegans@@@TRINITY_GG_5244_c0_g1_i2.p1	cinopinata@@@TRINITY_DN10017_c0_g1_i7.p1,cinopinata@@@TRINITY_DN8251_c0_g1_i4.p1	cjaponica@@@TRINITY_DN40_c0_g1_i2.p1	cremanei@@@TRINITY_DN2081_c0_g1_i1.p1,cremanei@@@TRINITY_DN2081_c0_g1_i3.p1	ppacificus@@@TRINITY_DN119_c0_g1_i1.p1,ppacificus@@@TRINITY_DN119_c0_g1_i2.p1
287	14	25	0.16	CEW1@@@TRINITY_DN16505_c0_g1_i1.p1	DF5006@@@TRINITY_DN133_c0_g1_i1.p1	DF5012@@@TRINITY_DN3184_c0_g1_i1.p1	DF5112@@@TRINITY_DN439_c0_g1_i3.p1,DF5112@@@TRINITY_DN439_c0_g1_i5.p1	MT8872@@@TRINITY_DN3227_c0_g1_i1.p1	F48A11.5a,F48A11.5b	cbrenneri@@@TRINITY_DN974_c0_g1_i6.p1,cbrenneri@@@TRINITY_DN974_c0_g1_i12.p1,cbrenneri@@@TRINITY_DN974_c0_g1_i5.p1,cbrenneri@@@TRINITY_DN974_c0_g1_i8.p1	cbriggsae@@@TRINITY_DN1276_c0_g3_i2.p1,cbriggsae@@@TRINITY_DN1276_c0_g3_i1.p1	celegans@@@TRINITY_DN723_c0_g3_i1.p1,celegans@@@TRINITY_DN723_c0_g3_i3.p1	celegans@@@TRINITY_GG_13013_c0_g1_i1.p1,celegans@@@TRINITY_GG_13013_c0_g1_i2.p1	cinopinata@@@TRINITY_DN119_c0_g1_i1.p1,cinopinata@@@TRINITY_DN119_c0_g1_i3.p1,cinopinata@@@TRINITY_DN119_c0_g2_i1.p1	cjaponica@@@TRINITY_DN191_c0_g1_i1.p1,cjaponica@@@TRINITY_DN191_c0_g1_i3.p1	cremanei@@@TRINITY_DN222_c0_g1_i9.p1	ppacificus@@@TRINITY_DN5602_c0_g1_i1.p1
288	14	25	0.16	CEW1@@@TRINITY_DN3011_c0_g1_i1.p1	DF5006@@@TRINITY_DN2826_c0_g1_i2.p1,DF5006@@@TRINITY_DN2826_c0_g1_i1.p1	DF5012@@@TRINITY_DN1477_c1_g1_i1.p1	DF5112@@@TRINITY_DN1126_c0_g1_i1.p1,DF5112@@@TRINITY_DN1126_c0_g1_i2.p1	MT8872@@@TRINITY_DN6183_c0_g1_i1.p1	F53E4.1a,F53E4.1b,F53E4.1d	cbrenneri@@@TRINITY_DN12988_c0_g2_i1.p1,cbrenneri@@@TRINITY_DN12988_c0_g2_i2.p1	cbriggsae@@@TRINITY_DN1983_c0_g1_i1.p1	celegans@@@TRINITY_DN2036_c1_g2_i3.p1,celegans@@@TRINITY_DN2036_c1_g2_i4.p1	celegans@@@TRINITY_GG_17764_c0_g1_i1.p1,celegans@@@TRINITY_GG_17764_c0_g1_i2.p1	cinopinata@@@TRINITY_DN3466_c0_g1_i2.p1,cinopinata@@@TRINITY_DN3466_c0_g1_i3.p1	cjaponica@@@TRINITY_DN6182_c0_g1_i3.p1,cjaponica@@@TRINITY_DN6182_c0_g1_i4.p1	cremanei@@@TRINITY_DN2813_c0_g1_i1.p1,cremanei@@@TRINITY_DN2813_c0_g1_i2.p1	ppacificus@@@TRINITY_DN9190_c0_g2_i2.p1,ppacificus@@@TRINITY_DN9190_c0_g2_i3.p1
289	14	25	0.146	CEW1@@@TRINITY_DN5672_c0_g2_i1.p1	DF5006@@@TRINITY_DN983_c0_g1_i1.p1	DF5012@@@TRINITY_DN87_c0_g1_i1.p1	DF5112@@@TRINITY_DN227_c0_g1_i1.p1	MT8872@@@TRINITY_DN21350_c0_g1_i1.p1,MT8872@@@TRINITY_DN20858_c0_g1_i1.p1	C34D4.2,F23B12.1	cbrenneri@@@TRINITY_DN29958_c0_g1_i1.p1,cbrenneri@@@TRINITY_DN21394_c0_g1_i1.p1	cbriggsae@@@TRINITY_DN25698_c0_g1_i1.p1,cbriggsae@@@TRINITY_DN11142_c0_g2_i1.p1	celegans@@@TRINITY_DN15349_c0_g1_i1.p1,celegans@@@TRINITY_DN19982_c0_g1_i1.p1	celegans@@@TRINITY_GG_2266_c0_g1_i1.p1,celegans@@@TRINITY_GG_6092_c0_g1_i1.p1	cinopinata@@@TRINITY_DN1692_c0_g1_i1.p1,cinopinata@@@TRINITY_DN783_c0_g2_i1.p1,cinopinata@@@TRINITY_DN783_c0_g2_i2.p1,cinopinata@@@TRINITY_DN783_c0_g2_i3.p1	cjaponica@@@TRINITY_DN4186_c0_g1_i1.p1,cjaponica@@@TRINITY_DN28175_c0_g1_i1.p1	cremanei@@@TRINITY_DN4355_c0_g1_i1.p1,cremanei@@@TRINITY_DN263_c0_g2_i1.p1	ppacificus@@@TRINITY_DN22604_c0_g1_i1.p1
290	14	25	0.133	CEW1@@@TRINITY_DN6505_c0_g1_i1.p1	DF5006@@@TRINITY_DN17625_c0_g1_i1.p1	DF5012@@@TRINITY_DN3151_c0_g5_i1.p1,DF5012@@@TRINITY_DN17821_c0_g1_i1.p1	DF5112@@@TRINITY_DN2472_c0_g1_i1.p1,DF5112@@@TRINITY_DN2503_c0_g1_i1.p1	MT8872@@@TRINITY_DN3359_c0_g1_i1.p1,MT8872@@@TRINITY_DN3359_c0_g1_i2.p1	F09E10.3,Y39A1A.11a	cbrenneri@@@TRINITY_DN7023_c0_g1_i2.p1,cbrenneri@@@TRINITY_DN7023_c0_g1_i4.p1,cbrenneri@@@TRINITY_DN7023_c0_g1_i1.p1	cbriggsae@@@TRINITY_DN1789_c0_g1_i1.p1,cbriggsae@@@TRINITY_DN19023_c0_g1_i1.p1	celegans@@@TRINITY_DN3614_c0_g1_i1.p1,celegans@@@TRINITY_DN17624_c0_g1_i1.p1	celegans@@@TRINITY_GG_20688_c0_g1_i1.p1,celegans@@@TRINITY_GG_4853_c2_g1_i1.p1	cinopinata@@@TRINITY_DN1064_c0_g1_i1.p1,cinopinata@@@TRINITY_DN1835_c0_g1_i1.p1	cjaponica@@@TRINITY_DN2555_c0_g1_i1.p1	cremanei@@@TRINITY_DN5969_c0_g1_i4.p1,cremanei@@@TRINITY_DN5267_c0_g1_i1.p1	ppacificus@@@TRINITY_DN27542_c0_g1_i1.p1
291	14	25	0.123	CEW1@@@TRINITY_DN20585_c0_g1_i1.p1	DF5006@@@TRINITY_DN15494_c0_g1_i1.p1	DF5012@@@TRINITY_DN2362_c0_g1_i1.p1	DF5112@@@TRINITY_DN1152_c0_g1_i2.p1,DF5112@@@TRINITY_DN1152_c0_g1_i1.p1,DF5112@@@TRINITY_DN1152_c0_g1_i3.p1	MT8872@@@TRINITY_DN14089_c0_g1_i1.p1	M01E5.5b,M01E5.5a	cbrenneri@@@TRINITY_DN5180_c0_g1_i1.p1,cbrenneri@@@TRINITY_DN5180_c0_g1_i2.p1	cbriggsae@@@TRINITY_DN6864_c0_g2_i1.p1,cbriggsae@@@TRINITY_DN6864_c0_g2_i2.p1,cbriggsae@@@TRINITY_DN6864_c0_g2_i3.p1,cbriggsae@@@TRINITY_DN6864_c0_g2_i4.p1	celegans@@@TRINITY_DN4489_c0_g1_i2.p1,celegans@@@TRINITY_DN4489_c0_g1_i1.p1	celegans@@@TRINITY_GG_11501_c0_g1_i1.p1	cinopinata@@@TRINITY_DN945_c0_g2_i2.p1	cjaponica@@@TRINITY_DN2686_c0_g1_i1.p1,cjaponica@@@TRINITY_DN2686_c0_g1_i2.p1	cremanei@@@TRINITY_DN7490_c0_g1_i3.p1,cremanei@@@TRINITY_DN7490_c0_g1_i4.p1,cremanei@@@TRINITY_DN7490_c0_g1_i2.p1	ppacificus@@@TRINITY_DN2231_c0_g1_i1.p1
292	14	25	0.122	CEW1@@@TRINITY_DN1995_c0_g2_i1.p1,CEW1@@@TRINITY_DN1995_c0_g2_i2.p1	DF5006@@@TRINITY_DN944_c0_g1_i2.p1,DF5006@@@TRINITY_DN944_c0_g1_i3.p1,DF5006@@@TRINITY_DN944_c0_g1_i4.p1	DF5012@@@TRINITY_DN2508_c0_g1_i1.p1,DF5012@@@TRINITY_DN2508_c0_g1_i5.p1	DF5112@@@TRINITY_DN1931_c0_g1_i1.p1	MT8872@@@TRINITY_DN2443_c0_g1_i2.p1	E02H4.3b,E02H4.3d	cbrenneri@@@TRINITY_DN9642_c0_g2_i1.p1,cbrenneri@@@TRINITY_DN9642_c0_g2_i2.p1,cbrenneri@@@TRINITY_DN9642_c0_g2_i5.p1	cbriggsae@@@TRINITY_DN1848_c0_g1_i2.p1	celegans@@@TRINITY_DN1627_c0_g1_i1.p1,celegans@@@TRINITY_DN1627_c0_g1_i2.p1	celegans@@@TRINITY_GG_16637_c0_g1_i1.p1	cinopinata@@@TRINITY_DN1940_c0_g1_i2.p1	cjaponica@@@TRINITY_DN6029_c0_g1_i1.p1	cremanei@@@TRINITY_DN3104_c0_g1_i4.p1,cremanei@@@TRINITY_DN3104_c0_g1_i7.p1,cremanei@@@TRINITY_DN3104_c0_g1_i8.p1	ppacificus@@@TRINITY_DN18255_c0_g1_i1.p1,ppacificus@@@TRINITY_DN17268_c0_g1_i1.p1
293	14	25	0.114	CEW1@@@TRINITY_DN437_c0_g1_i2.p1,CEW1@@@TRINITY_DN437_c0_g1_i1.p1	DF5006@@@TRINITY_DN1371_c0_g2_i1.p1	DF5012@@@TRINITY_DN1896_c0_g1_i1.p1	DF5112@@@TRINITY_DN1027_c0_g2_i1.p1,DF5112@@@TRINITY_DN1027_c0_g2_i3.p1,DF5112@@@TRINITY_DN1027_c0_g2_i2.p1	MT8872@@@TRINITY_DN1254_c0_g1_i2.p1,MT8872@@@TRINITY_DN1254_c0_g1_i1.p1	Y71H10B.1a,Y71H10B.1b,Y71H10B.1c	cbrenneri@@@TRINITY_DN1462_c0_g1_i2.p1,cbrenneri@@@TRINITY_DN1462_c0_g1_i1.p1	cbriggsae@@@TRINITY_DN160_c0_g1_i1.p1	celegans@@@TRINITY_DN64_c0_g1_i1.p1	celegans@@@TRINITY_GG_15820_c0_g1_i1.p1	cinopinata@@@TRINITY_DN657_c0_g1_i3.p1,cinopinata@@@TRINITY_DN657_c0_g1_i1.p1	cjaponica@@@TRINITY_DN942_c0_g1_i1.p1,cjaponica@@@TRINITY_DN942_c0_g1_i2.p1	cremanei@@@TRINITY_DN608_c0_g1_i1.p1,cremanei@@@TRINITY_DN608_c0_g1_i3.p1	ppacificus@@@TRINITY_DN88_c0_g1_i1.p1,ppacificus@@@TRINITY_DN88_c0_g1_i2.p1
294	14	25	0.11	CEW1@@@TRINITY_DN839_c0_g1_i11.p1,CEW1@@@TRINITY_DN839_c0_g1_i12.p1,CEW1@@@TRINITY_DN839_c0_g1_i9.p1,CEW1@@@TRINITY_DN839_c0_g1_i1.p1,CEW1@@@TRINITY_DN839_c0_g1_i2.p1	DF5006@@@TRINITY_DN3287_c0_g1_i1.p1,DF5006@@@TRINITY_DN3287_c0_g1_i2.p1	DF5012@@@TRINITY_DN5643_c0_g1_i1.p1,DF5012@@@TRINITY_DN5643_c0_g1_i4.p1,DF5012@@@TRINITY_DN5643_c0_g1_i2.p1	DF5112@@@TRINITY_DN6081_c0_g1_i1.p1	MT8872@@@TRINITY_DN2560_c0_g1_i1.p1	F10D7.5a	cbrenneri@@@TRINITY_DN9150_c0_g2_i1.p1,cbrenneri@@@TRINITY_DN9150_c0_g2_i2.p1	cbriggsae@@@TRINITY_DN7967_c0_g1_i3.p1,cbriggsae@@@TRINITY_DN7967_c0_g1_i1.p1	celegans@@@TRINITY_DN6400_c0_g2_i1.p1	celegans@@@TRINITY_GG_16130_c0_g1_i2.p1	cinopinata@@@TRINITY_DN3138_c0_g2_i1.p1	cjaponica@@@TRINITY_DN4476_c0_g2_i2.p1	cremanei@@@TRINITY_DN11091_c0_g1_i1.p1,cremanei@@@TRINITY_DN11091_c0_g1_i3.p1	ppacificus@@@TRINITY_DN3005_c0_g1_i2.p1,ppacificus@@@TRINITY_DN3005_c0_g1_i1.p1
295	14	24	0.737	CEW1@@@TRINITY_DN467_c0_g1_i1.p1,CEW1@@@TRINITY_DN467_c0_g1_i2.p1	DF5006@@@TRINITY_DN2231_c0_g1_i1.p1,DF5006@@@TRINITY_DN2231_c0_g1_i2.p1	DF5012@@@TRINITY_DN1299_c0_g1_i1.p1,DF5012@@@TRINITY_DN1299_c0_g1_i2.p1	DF5112@@@TRINITY_DN464_c0_g1_i1.p1	MT8872@@@TRINITY_DN1443_c0_g1_i3.p1,MT8872@@@TRINITY_DN1443_c0_g1_i4.p1	T02C5.3a,T02C5.3b	cbrenneri@@@TRINITY_DN4216_c0_g1_i1.p1	cbriggsae@@@TRINITY_DN8005_c0_g1_i1.p1,cbriggsae@@@TRINITY_DN8005_c0_g1_i2.p1	celegans@@@TRINITY_DN1902_c0_g1_i1.p1,celegans@@@TRINITY_DN1902_c0_g1_i2.p1	celegans@@@TRINITY_GG_15833_c0_g1_i1.p1,celegans@@@TRINITY_GG_15833_c0_g1_i2.p1	cinopinata@@@TRINITY_DN3275_c0_g1_i1.p1,cinopinata@@@TRINITY_DN3275_c0_g1_i2.p1	cjaponica@@@TRINITY_DN11387_c0_g1_i1.p1	cremanei@@@TRINITY_DN6113_c0_g1_i1.p1	ppacificus@@@TRINITY_DN922_c0_g1_i1.p1,ppacificus@@@TRINITY_DN922_c0_g1_i2.p1
296	14	24	0.699	CEW1@@@TRINITY_DN681_c0_g1_i1.p1,CEW1@@@TRINITY_DN681_c0_g1_i5.p1	DF5006@@@TRINITY_DN1688_c0_g1_i1.p1,DF5006@@@TRINITY_DN1688_c0_g1_i3.p1	DF5012@@@TRINITY_DN1669_c0_g1_i1.p1,DF5012@@@TRINITY_DN1669_c0_g1_i3.p1,DF5012@@@TRINITY_DN1669_c0_g1_i5.p1,DF5012@@@TRINITY_DN1669_c0_g1_i6.p1	DF5112@@@TRINITY_DN564_c1_g7_i2.p1,DF5112@@@TRINITY_DN564_c1_g7_i4.p1	MT8872@@@TRINITY_DN352_c0_g3_i2.p1,MT8872@@@TRINITY_DN352_c0_g3_i4.p1	Y48G8AR.1a,Y48G8AR.1b	cbrenneri@@@TRINITY_DN3517_c0_g1_i1.p1,cbrenneri@@@TRINITY_DN3517_c0_g1_i3.p1	cbriggsae@@@TRINITY_DN1934_c0_g1_i1.p1	celegans@@@TRINITY_DN3748_c0_g2_i1.p1	celegans@@@TRINITY_GG_21606_c0_g1_i1.p1	cinopinata@@@TRINITY_DN4192_c0_g1_i2.p1	cjaponica@@@TRINITY_DN3680_c0_g1_i2.p1	cremanei@@@TRINITY_DN2590_c0_g1_i14.p1,cremanei@@@TRINITY_DN2590_c0_g1_i2.p1	ppacificus@@@TRINITY_DN2819_c0_g1_i10.p1
297	14	24	0.609	CEW1@@@TRINITY_DN954_c0_g1_i1.p1,CEW1@@@TRINITY_DN954_c0_g1_i2.p1	DF5006@@@TRINITY_DN3422_c0_g1_i3.p1,DF5006@@@TRINITY_DN3422_c0_g1_i5.p1,DF5006@@@TRINITY_DN3422_c0_g1_i4.p1	DF5012@@@TRINITY_DN296_c0_g1_i1.p1,DF5012@@@TRINITY_DN296_c0_g1_i3.p1,DF5012@@@TRINITY_DN296_c0_g1_i4.p1,DF5012@@@TRINITY_DN296_c0_g1_i5.p1	DF5112@@@TRINITY_DN537_c0_g1_i2.p1	MT8872@@@TRINITY_DN15149_c0_g1_i1.p1	ZK652.10	cbrenneri@@@TRINITY_DN848_c0_g1_i2.p1,cbrenneri@@@TRINITY_DN848_c0_g1_i3.p1	cbriggsae@@@TRINITY_DN510_c0_g1_i1.p1	celegans@@@TRINITY_DN6096_c0_g1_i1.p1,celegans@@@TRINITY_DN6096_c0_g1_i2.p1	celegans@@@TRINITY_GG_20883_c0_g1_i1.p1	cinopinata@@@TRINITY_DN1965_c0_g1_i1.p1	cjaponica@@@TRINITY_DN5140_c0_g1_i1.p1,cjaponica@@@TRINITY_DN5140_c0_g1_i2.p1	cremanei@@@TRINITY_DN1888_c1_g1_i1.p1,cremanei@@@TRINITY_DN1888_c1_g1_i2.p1	ppacificus@@@TRINITY_DN5085_c0_g1_i1.p1
298	14	24	0.592	CEW1@@@TRINITY_DN2908_c0_g1_i1.p1,CEW1@@@TRINITY_DN2908_c0_g1_i2.p1	DF5006@@@TRINITY_DN1366_c0_g1_i1.p1,DF5006@@@TRINITY_DN1366_c0_g1_i2.p1	DF5012@@@TRINITY_DN943_c0_g1_i1.p1	DF5112@@@TRINITY_DN1156_c0_g1_i3.p1	MT8872@@@TRINITY_DN1447_c0_g1_i1.p1,MT8872@@@TRINITY_DN1447_c0_g1_i2.p1,MT8872@@@TRINITY_DN1447_c0_g1_i3.p1	R05D3.7	cbrenneri@@@TRINITY_DN6531_c0_g1_i1.p1	cbriggsae@@@TRINITY_DN3114_c0_g1_i1.p1	celegans@@@TRINITY_DN3669_c0_g1_i1.p1,celegans@@@TRINITY_DN3669_c0_g1_i2.p1	celegans@@@TRINITY_GG_20669_c1_g1_i1.p1	cinopinata@@@TRINITY_DN4280_c0_g1_i1.p1,cinopinata@@@TRINITY_DN4280_c0_g1_i2.p1	cjaponica@@@TRINITY_DN10944_c0_g1_i1.p1,cjaponica@@@TRINITY_DN10944_c0_g1_i3.p1	cremanei@@@TRINITY_DN3508_c0_g1_i2.p1,cremanei@@@TRINITY_DN3508_c0_g1_i3.p1,cremanei@@@TRINITY_DN3508_c0_g1_i4.p1	ppacificus@@@TRINITY_DN2385_c0_g1_i1.p1,ppacificus@@@TRINITY_DN2385_c0_g1_i2.p1
299	14	24	0.589	CEW1@@@TRINITY_DN16506_c0_g1_i1.p1,CEW1@@@TRINITY_DN1554_c0_g1_i1.p1,CEW1@@@TRINITY_DN1554_c0_g1_i2.p1	DF5006@@@TRINITY_DN5162_c0_g1_i1.p1	DF5012@@@TRINITY_DN1447_c0_g1_i1.p1,DF5012@@@TRINITY_DN1447_c0_g1_i2.p1	DF5112@@@TRINITY_DN659_c0_g2_i1.p1	MT8872@@@TRINITY_DN2017_c0_g1_i1.p1,MT8872@@@TRINITY_DN2017_c0_g1_i3.p1,MT8872@@@TRINITY_DN2017_c0_g1_i4.p1	C26E6.3	cbrenneri@@@TRINITY_DN4441_c0_g1_i1.p1,cbrenneri@@@TRINITY_DN4441_c0_g1_i2.p1	cbriggsae@@@TRINITY_DN845_c0_g1_i1.p1,cbriggsae@@@TRINITY_DN845_c0_g1_i2.p1	celegans@@@TRINITY_DN858_c0_g1_i1.p1	celegans@@@TRINITY_GG_9003_c0_g1_i1.p1	cinopinata@@@TRINITY_DN7348_c0_g1_i3.p1,cinopinata@@@TRINITY_DN7348_c0_g1_i5.p1	cjaponica@@@TRINITY_DN3169_c0_g1_i1.p1,cjaponica@@@TRINITY_DN3169_c0_g1_i2.p1,cjaponica@@@TRINITY_DN3169_c0_g1_i3.p1	cremanei@@@TRINITY_DN9014_c0_g1_i1.p1	ppacificus@@@TRINITY_DN2291_c0_g1_i1.p2
300	14	24	0.579	CEW1@@@TRINITY_DN1584_c0_g1_i1.p1	DF5006@@@TRINITY_DN15195_c0_g1_i1.p1	DF5012@@@TRINITY_DN1088_c0_g1_i1.p1	DF5112@@@TRINITY_DN4534_c0_g1_i1.p1	MT8872@@@TRINITY_DN13779_c0_g1_i1.p1	ZC477.3a,ZC477.3b	cbrenneri@@@TRINITY_DN4490_c0_g1_i1.p1,cbrenneri@@@TRINITY_DN4490_c0_g1_i2.p1	cbriggsae@@@TRINITY_DN3007_c0_g1_i1.p1,cbriggsae@@@TRINITY_DN3007_c0_g1_i2.p1	celegans@@@TRINITY_DN2136_c0_g1_i1.p1,celegans@@@TRINITY_DN2136_c0_g1_i2.p1	celegans@@@TRINITY_GG_2256_c0_g1_i1.p1,celegans@@@TRINITY_GG_2256_c0_g1_i2.p1	cinopinata@@@TRINITY_DN4667_c0_g1_i1.p2,cinopinata@@@TRINITY_DN4667_c0_g1_i5.p1,cinopinata@@@TRINITY_DN4667_c0_g1_i6.p2,cinopinata@@@TRINITY_DN4667_c0_g1_i8.p2	cjaponica@@@TRINITY_DN1357_c0_g2_i1.p1,cjaponica@@@TRINITY_DN1357_c0_g2_i2.p1	cremanei@@@TRINITY_DN4644_c0_g2_i1.p1,cremanei@@@TRINITY_DN4644_c0_g2_i2.p1	ppacificus@@@TRINITY_DN632_c0_g2_i2.p1
301	14	24	0.563	CEW1@@@TRINITY_DN1330_c0_g1_i2.p1	DF5006@@@TRINITY_DN437_c0_g3_i1.p1	DF5012@@@TRINITY_DN3509_c0_g1_i1.p1,DF5012@@@TRINITY_DN3509_c0_g1_i3.p1	DF5112@@@TRINITY_DN699_c0_g1_i1.p1,DF5112@@@TRINITY_DN699_c0_g1_i2.p1	MT8872@@@TRINITY_DN20618_c0_g1_i1.p1	K03E6.5a,K03E6.5b	cbrenneri@@@TRINITY_DN755_c0_g1_i1.p1,cbrenneri@@@TRINITY_DN755_c0_g1_i2.p1	cbriggsae@@@TRINITY_DN792_c0_g1_i1.p1,cbriggsae@@@TRINITY_DN792_c0_g1_i2.p1	celegans@@@TRINITY_DN392_c0_g1_i1.p1,celegans@@@TRINITY_DN392_c0_g1_i2.p1	celegans@@@TRINITY_GG_16339_c0_g1_i1.p1,celegans@@@TRINITY_GG_16339_c0_g1_i2.p1	cinopinata@@@TRINITY_DN802_c0_g1_i1.p1,cinopinata@@@TRINITY_DN802_c0_g1_i2.p1	cjaponica@@@TRINITY_DN2377_c0_g1_i1.p1,cjaponica@@@TRINITY_DN2377_c0_g1_i2.p1	cremanei@@@TRINITY_DN895_c0_g1_i1.p1,cremanei@@@TRINITY_DN895_c0_g1_i2.p1	ppacificus@@@TRINITY_DN859_c0_g1_i2.p1
302	14	24	0.562	CEW1@@@TRINITY_DN4478_c0_g1_i1.p1,CEW1@@@TRINITY_DN4478_c0_g1_i2.p1	DF5006@@@TRINITY_DN3822_c0_g1_i1.p1,DF5006@@@TRINITY_DN3822_c0_g1_i2.p1	DF5012@@@TRINITY_DN6727_c0_g1_i1.p1,DF5012@@@TRINITY_DN6727_c0_g1_i2.p1	DF5112@@@TRINITY_DN755_c0_g1_i1.p1,DF5112@@@TRINITY_DN755_c0_g1_i2.p1,DF5112@@@TRINITY_DN755_c0_g1_i3.p1	MT8872@@@TRINITY_DN3745_c0_g1_i1.p1,MT8872@@@TRINITY_DN3745_c0_g1_i2.p1	F53A2.8b,F53A2.8a,F53A2.8c	cbrenneri@@@TRINITY_DN7865_c0_g1_i1.p1,cbrenneri@@@TRINITY_DN7865_c0_g1_i3.p1	cbriggsae@@@TRINITY_DN4562_c0_g1_i1.p1	celegans@@@TRINITY_DN2890_c0_g1_i1.p1	celegans@@@TRINITY_GG_8174_c0_g2_i1.p1	cinopinata@@@TRINITY_DN1935_c0_g1_i1.p1	cjaponica@@@TRINITY_DN4346_c0_g1_i1.p1	cremanei@@@TRINITY_DN3495_c0_g1_i1.p1,cremanei@@@TRINITY_DN3495_c0_g1_i3.p1	ppacificus@@@TRINITY_DN3071_c0_g1_i1.p1
303	14	24	0.538	CEW1@@@TRINITY_DN1090_c0_g1_i2.p1,CEW1@@@TRINITY_DN1090_c0_g1_i3.p1,CEW1@@@TRINITY_DN1090_c0_g1_i8.p1	DF5006@@@TRINITY_DN2893_c0_g2_i7.p1	DF5012@@@TRINITY_DN4768_c0_g1_i2.p1	DF5112@@@TRINITY_DN5199_c0_g1_i5.p1,DF5112@@@TRINITY_DN5199_c0_g1_i3.p1	MT8872@@@TRINITY_DN8300_c0_g1_i2.p1	ZK1321.2b,ZK1321.2c,ZK1321.2d	cbrenneri@@@TRINITY_DN3593_c0_g1_i2.p1,cbrenneri@@@TRINITY_DN3593_c0_g1_i1.p1	cbriggsae@@@TRINITY_DN3101_c0_g2_i2.p1,cbriggsae@@@TRINITY_DN3101_c0_g2_i4.p1	celegans@@@TRINITY_DN2106_c0_g1_i1.p1,celegans@@@TRINITY_DN2106_c0_g1_i4.p1	celegans@@@TRINITY_GG_1438_c0_g1_i1.p1	cinopinata@@@TRINITY_DN2411_c0_g1_i2.p1,cinopinata@@@TRINITY_DN2411_c0_g1_i4.p1	cjaponica@@@TRINITY_DN1539_c1_g1_i2.p1	cremanei@@@TRINITY_DN9056_c0_g1_i3.p1	ppacificus@@@TRINITY_DN6862_c0_g1_i4.p1,ppacificus@@@TRINITY_DN6862_c0_g1_i5.p1
304	14	24	0.396	CEW1@@@TRINITY_DN2206_c0_g1_i1.p1,CEW1@@@TRINITY_DN2206_c0_g2_i1.p1	DF5006@@@TRINITY_DN15539_c0_g1_i1.p1	DF5012@@@TRINITY_DN58_c0_g1_i1.p1,DF5012@@@TRINITY_DN58_c0_g2_i1.p1	DF5112@@@TRINITY_DN4360_c0_g1_i1.p1	MT8872@@@TRINITY_DN69_c0_g2_i1.p1,MT8872@@@TRINITY_DN69_c0_g1_i1.p1	C25G4.6,T21G5.4	cbrenneri@@@TRINITY_DN9900_c0_g1_i1.p1	cbriggsae@@@TRINITY_DN23302_c0_g1_i1.p2,cbriggsae@@@TRINITY_DN20903_c0_g1_i1.p1	celegans@@@TRINITY_DN689_c0_g1_i1.p1,celegans@@@TRINITY_DN689_c0_g2_i1.p1	celegans@@@TRINITY_GG_22219_c0_g1_i1.p1,celegans@@@TRINITY_GG_3244_c0_g1_i1.p1	cinopinata@@@TRINITY_DN7255_c0_g1_i1.p1	cjaponica@@@TRINITY_DN22002_c0_g1_i1.p1,cjaponica@@@TRINITY_DN2876_c0_g1_i1.p1	cremanei@@@TRINITY_DN14421_c0_g1_i1.p1,cremanei@@@TRINITY_DN1466_c0_g1_i1.p1	ppacificus@@@TRINITY_DN430_c0_g1_i1.p1,ppacificus@@@TRINITY_DN430_c0_g1_i2.p1
305	14	24	0.381	CEW1@@@TRINITY_DN13277_c0_g1_i1.p1	DF5006@@@TRINITY_DN631_c0_g1_i1.p1	DF5012@@@TRINITY_DN465_c0_g1_i1.p1,DF5012@@@TRINITY_DN465_c0_g1_i2.p1,DF5012@@@TRINITY_DN465_c0_g1_i4.p1	DF5112@@@TRINITY_DN729_c0_g1_i2.p1,DF5112@@@TRINITY_DN729_c0_g1_i3.p1	MT8872@@@TRINITY_DN4871_c0_g1_i1.p1	C41C4.7a,C41C4.7b	cbrenneri@@@TRINITY_DN1546_c0_g1_i4.p1,cbrenneri@@@TRINITY_DN1546_c0_g1_i2.p1	cbriggsae@@@TRINITY_DN2773_c0_g1_i1.p1,cbriggsae@@@TRINITY_DN2773_c0_g1_i3.p1	celegans@@@TRINITY_DN15863_c0_g1_i1.p1	celegans@@@TRINITY_GG_13200_c0_g1_i1.p1	cinopinata@@@TRINITY_DN5340_c0_g1_i2.p1	cjaponica@@@TRINITY_DN3503_c0_g1_i3.p1,cjaponica@@@TRINITY_DN3503_c0_g1_i2.p1	cremanei@@@TRINITY_DN3449_c0_g1_i1.p1	ppacificus@@@TRINITY_DN1159_c0_g1_i1.p1,ppacificus@@@TRINITY_DN1159_c0_g1_i2.p1,ppacificus@@@TRINITY_DN1159_c0_g1_i3.p1,ppacificus@@@TRINITY_DN1159_c0_g1_i4.p1
306	14	24	0.361	CEW1@@@TRINITY_DN6488_c0_g2_i1.p1	DF5006@@@TRINITY_DN18114_c0_g1_i1.p1	DF5012@@@TRINITY_DN21456_c0_g1_i1.p1	DF5112@@@TRINITY_DN5554_c0_g1_i1.p1	MT8872@@@TRINITY_DN19503_c0_g1_i1.p1	T05C12.6a,T05C12.6b	cbrenneri@@@TRINITY_DN8162_c0_g1_i1.p1,cbrenneri@@@TRINITY_DN8162_c0_g1_i2.p1,cbrenneri@@@TRINITY_DN8162_c0_g1_i3.p1	cbriggsae@@@TRINITY_DN1368_c0_g1_i1.p1,cbriggsae@@@TRINITY_DN1368_c0_g1_i2.p1	celegans@@@TRINITY_DN2419_c0_g1_i2.p1,celegans@@@TRINITY_DN2419_c0_g1_i1.p1	celegans@@@TRINITY_GG_13168_c0_g1_i2.p1,celegans@@@TRINITY_GG_13168_c0_g1_i1.p1	cinopinata@@@TRINITY_DN1642_c0_g1_i1.p1,cinopinata@@@TRINITY_DN1642_c0_g1_i2.p1	cjaponica@@@TRINITY_DN3635_c0_g2_i4.p1,cjaponica@@@TRINITY_DN3635_c0_g2_i6.p1	cremanei@@@TRINITY_DN1794_c1_g1_i2.p1,cremanei@@@TRINITY_DN1794_c1_g1_i3.p1	ppacificus@@@TRINITY_DN1839_c0_g1_i1.p1,ppacificus@@@TRINITY_DN1839_c0_g1_i3.p1
307	14	24	0.356	CEW1@@@TRINITY_DN3362_c0_g1_i1.p1	DF5006@@@TRINITY_DN341_c0_g1_i1.p1,DF5006@@@TRINITY_DN341_c0_g1_i2.p1	DF5012@@@TRINITY_DN960_c1_g1_i13.p1	DF5112@@@TRINITY_DN111_c1_g1_i1.p1	MT8872@@@TRINITY_DN462_c0_g1_i1.p1,MT8872@@@TRINITY_DN462_c0_g1_i2.p1,MT8872@@@TRINITY_DN462_c0_g1_i4.p1	Y37E11AR.2	cbrenneri@@@TRINITY_DN1888_c0_g1_i1.p1	cbriggsae@@@TRINITY_DN926_c0_g1_i1.p1,cbriggsae@@@TRINITY_DN926_c0_g1_i2.p1	celegans@@@TRINITY_DN15937_c0_g1_i1.p1	celegans@@@TRINITY_GG_4011_c0_g1_i1.p1	cinopinata@@@TRINITY_DN3201_c0_g1_i1.p1,cinopinata@@@TRINITY_DN3201_c0_g1_i2.p1	cjaponica@@@TRINITY_DN573_c0_g1_i10.p1,cjaponica@@@TRINITY_DN573_c0_g1_i4.p1,cjaponica@@@TRINITY_DN573_c0_g1_i7.p1,cjaponica@@@TRINITY_DN573_c0_g1_i9.p1	cremanei@@@TRINITY_DN2755_c0_g1_i2.p1,cremanei@@@TRINITY_DN2755_c0_g1_i3.p1,cremanei@@@TRINITY_DN2755_c0_g1_i4.p1	ppacificus@@@TRINITY_DN29909_c0_g1_i1.p1
308	14	24	0.348	CEW1@@@TRINITY_DN1109_c0_g1_i1.p1,CEW1@@@TRINITY_DN1109_c0_g1_i3.p1	DF5006@@@TRINITY_DN4947_c0_g1_i1.p1,DF5006@@@TRINITY_DN4947_c0_g1_i2.p1	DF5012@@@TRINITY_DN2068_c0_g1_i1.p1,DF5012@@@TRINITY_DN2068_c0_g1_i2.p1	DF5112@@@TRINITY_DN5448_c1_g1_i1.p1	MT8872@@@TRINITY_DN7226_c0_g1_i1.p1	F41D9.3a,F41D9.3b,F41D9.3e,F41D9.3f	cbrenneri@@@TRINITY_DN3406_c0_g1_i1.p1,cbrenneri@@@TRINITY_DN3406_c0_g1_i2.p1,cbrenneri@@@TRINITY_DN3406_c0_g1_i3.p1	cbriggsae@@@TRINITY_DN7879_c0_g1_i1.p1	celegans@@@TRINITY_DN7244_c0_g1_i1.p1,celegans@@@TRINITY_DN7244_c0_g1_i2.p1	celegans@@@TRINITY_GG_16476_c0_g1_i1.p1,celegans@@@TRINITY_GG_16476_c0_g1_i2.p1	cinopinata@@@TRINITY_DN13345_c0_g3_i1.p1	cjaponica@@@TRINITY_DN21491_c0_g1_i1.p1	cremanei@@@TRINITY_DN11861_c0_g1_i1.p1	ppacificus@@@TRINITY_DN11178_c0_g4_i2.p1
309	14	24	0.327	CEW1@@@TRINITY_DN9945_c0_g2_i1.p1,CEW1@@@TRINITY_DN9945_c0_g2_i3.p1	DF5006@@@TRINITY_DN160_c0_g2_i1.p1,DF5006@@@TRINITY_DN160_c0_g2_i4.p1	DF5012@@@TRINITY_DN1242_c0_g1_i1.p1,DF5012@@@TRINITY_DN1242_c0_g1_i2.p1	DF5112@@@TRINITY_DN644_c0_g1_i1.p1,DF5112@@@TRINITY_DN644_c0_g1_i4.p1	MT8872@@@TRINITY_DN492_c0_g1_i1.p1,MT8872@@@TRINITY_DN492_c0_g1_i2.p1	C34F11.9c,C34F11.9a	cbrenneri@@@TRINITY_DN6275_c0_g1_i2.p1	cbriggsae@@@TRINITY_DN11006_c0_g2_i2.p1,cbriggsae@@@TRINITY_DN11006_c0_g2_i1.p1	celegans@@@TRINITY_DN3511_c0_g1_i1.p1,celegans@@@TRINITY_DN3511_c0_g1_i2.p1	celegans@@@TRINITY_GG_13792_c0_g1_i1.p1,celegans@@@TRINITY_GG_13792_c0_g1_i3.p1	cinopinata@@@TRINITY_DN3425_c0_g1_i1.p1	cjaponica@@@TRINITY_DN2617_c2_g1_i3.p1	cremanei@@@TRINITY_DN4673_c0_g1_i1.p1,cremanei@@@TRINITY_DN4673_c0_g1_i2.p1	ppacificus@@@TRINITY_DN2169_c1_g1_i5.p1
310	14	24	0.291	CEW1@@@TRINITY_DN14629_c0_g1_i1.p1	DF5006@@@TRINITY_DN3311_c0_g1_i2.p1,DF5006@@@TRINITY_DN3311_c0_g1_i4.p1,DF5006@@@TRINITY_DN3311_c0_g1_i1.p1,DF5006@@@TRINITY_DN3311_c0_g1_i3.p1	DF5012@@@TRINITY_DN884_c0_g1_i2.p1,DF5012@@@TRINITY_DN884_c0_g1_i3.p1,DF5012@@@TRINITY_DN884_c0_g1_i4.p1	DF5112@@@TRINITY_DN124_c0_g1_i1.p1	MT8872@@@TRINITY_DN3772_c0_g1_i1.p1	K11D9.1a,K11D9.1b	cbrenneri@@@TRINITY_DN4161_c0_g1_i1.p1,cbrenneri@@@TRINITY_DN4161_c0_g1_i2.p1	cbriggsae@@@TRINITY_DN7134_c0_g1_i1.p1	celegans@@@TRINITY_DN24414_c0_g1_i1.p1	celegans@@@TRINITY_GG_9138_c0_g1_i1.p1	cinopinata@@@TRINITY_DN76_c0_g1_i2.p1,cinopinata@@@TRINITY_DN76_c0_g1_i1.p1	cjaponica@@@TRINITY_DN3872_c0_g1_i1.p1	cremanei@@@TRINITY_DN26266_c0_g2_i3.p1,cremanei@@@TRINITY_DN26266_c0_g2_i1.p1	ppacificus@@@TRINITY_DN2496_c0_g1_i1.p1,ppacificus@@@TRINITY_DN2496_c0_g1_i2.p1
311	14	24	0.252	CEW1@@@TRINITY_DN2107_c0_g1_i1.p1	DF5006@@@TRINITY_DN11804_c0_g1_i1.p1	DF5012@@@TRINITY_DN2916_c0_g1_i1.p1	DF5112@@@TRINITY_DN4701_c0_g1_i1.p1	MT8872@@@TRINITY_DN2092_c0_g1_i1.p1	F52H2.6a,F52H2.6b	cbrenneri@@@TRINITY_DN1643_c0_g1_i1.p1,cbrenneri@@@TRINITY_DN1643_c0_g1_i2.p1,cbrenneri@@@TRINITY_DN1643_c0_g1_i3.p1,cbrenneri@@@TRINITY_DN1643_c0_g1_i5.p1	cbriggsae@@@TRINITY_DN662_c0_g1_i2.p2	celegans@@@TRINITY_DN2125_c0_g1_i1.p1,celegans@@@TRINITY_DN2125_c0_g1_i2.p1	celegans@@@TRINITY_GG_15988_c1_g1_i1.p1,celegans@@@TRINITY_GG_15988_c1_g1_i2.p1	cinopinata@@@TRINITY_DN2226_c0_g1_i1.p1,cinopinata@@@TRINITY_DN2226_c0_g1_i2.p1	cjaponica@@@TRINITY_DN26568_c0_g1_i1.p1	cremanei@@@TRINITY_DN2466_c0_g1_i1.p1,cremanei@@@TRINITY_DN2466_c0_g1_i2.p1	ppacificus@@@TRINITY_DN533_c0_g1_i1.p1,ppacificus@@@TRINITY_DN533_c0_g1_i2.p1,ppacificus@@@TRINITY_DN533_c0_g1_i3.p1
312	14	24	0.223	CEW1@@@TRINITY_DN4978_c0_g1_i1.p1	DF5006@@@TRINITY_DN4568_c0_g1_i1.p1	DF5012@@@TRINITY_DN597_c0_g1_i6.p1,DF5012@@@TRINITY_DN597_c0_g1_i7.p1,DF5012@@@TRINITY_DN597_c0_g1_i9.p1	DF5112@@@TRINITY_DN5001_c0_g1_i1.p1	MT8872@@@TRINITY_DN15858_c0_g1_i1.p1	C01C7.1a,C01C7.1b	cbrenneri@@@TRINITY_DN11415_c0_g1_i1.p1,cbrenneri@@@TRINITY_DN11415_c0_g1_i2.p1	cbriggsae@@@TRINITY_DN3112_c0_g1_i2.p1,cbriggsae@@@TRINITY_DN3112_c0_g1_i3.p1	celegans@@@TRINITY_DN2549_c0_g1_i1.p1,celegans@@@TRINITY_DN2549_c0_g1_i2.p1	celegans@@@TRINITY_GG_15561_c0_g1_i1.p1,celegans@@@TRINITY_GG_15561_c0_g1_i2.p1	cinopinata@@@TRINITY_DN2745_c0_g2_i1.p1,cinopinata@@@TRINITY_DN2745_c0_g2_i2.p1	cjaponica@@@TRINITY_DN5640_c0_g1_i1.p1,cjaponica@@@TRINITY_DN5640_c0_g1_i2.p1	cremanei@@@TRINITY_DN13386_c0_g1_i1.p1,cremanei@@@TRINITY_DN13386_c0_g1_i2.p1	ppacificus@@@TRINITY_DN589_c0_g4_i1.p1
313	14	24	0.205	CEW1@@@TRINITY_DN391_c0_g2_i1.p1,CEW1@@@TRINITY_DN391_c0_g1_i1.p1	DF5006@@@TRINITY_DN13371_c0_g1_i1.p1	DF5012@@@TRINITY_DN3490_c0_g1_i1.p1	DF5112@@@TRINITY_DN13217_c0_g1_i1.p1	MT8872@@@TRINITY_DN4_c0_g1_i1.p1,MT8872@@@TRINITY_DN4_c0_g1_i2.p1	C06A1.1,C41C4.8	cbrenneri@@@TRINITY_DN2716_c0_g1_i1.p1,cbrenneri@@@TRINITY_DN2716_c0_g1_i2.p1,cbrenneri@@@TRINITY_DN2095_c0_g2_i1.p1	cbriggsae@@@TRINITY_DN539_c0_g2_i1.p1,cbriggsae@@@TRINITY_DN539_c0_g3_i1.p1	celegans@@@TRINITY_DN362_c0_g1_i1.p1,celegans@@@TRINITY_DN362_c0_g1_i2.p1	celegans@@@TRINITY_GG_12922_c1_g1_i1.p1,celegans@@@TRINITY_GG_1735_c0_g1_i1.p1	cinopinata@@@TRINITY_DN546_c0_g1_i1.p1	cjaponica@@@TRINITY_DN487_c0_g3_i1.p1,cjaponica@@@TRINITY_DN487_c0_g1_i1.p1	cremanei@@@TRINITY_DN43_c0_g2_i1.p1,cremanei@@@TRINITY_DN43_c0_g1_i1.p1	ppacificus@@@TRINITY_DN24829_c0_g1_i1.p1
314	14	24	0.147	CEW1@@@TRINITY_DN7175_c0_g2_i3.p1,CEW1@@@TRINITY_DN7175_c0_g2_i5.p1,CEW1@@@TRINITY_DN7175_c0_g2_i4.p1	DF5006@@@TRINITY_DN8501_c0_g2_i2.p1,DF5006@@@TRINITY_DN8501_c0_g2_i3.p1	DF5012@@@TRINITY_DN11741_c0_g1_i1.p1	DF5112@@@TRINITY_DN2023_c0_g1_i1.p1,DF5112@@@TRINITY_DN2023_c0_g1_i2.p1	MT8872@@@TRINITY_DN4060_c0_g1_i1.p1	R05G6.10d,R05G6.10c,R05G6.10e,R05G6.10a	cbrenneri@@@TRINITY_DN19138_c0_g1_i1.p1,cbrenneri@@@TRINITY_DN19138_c0_g1_i2.p1,cbrenneri@@@TRINITY_DN19138_c0_g1_i3.p1	cbriggsae@@@TRINITY_DN2413_c0_g1_i1.p1	celegans@@@TRINITY_DN1334_c0_g1_i1.p1	celegans@@@TRINITY_GG_14715_c0_g1_i1.p1	cinopinata@@@TRINITY_DN2490_c0_g1_i1.p1	cjaponica@@@TRINITY_DN18113_c0_g4_i1.p1,cjaponica@@@TRINITY_DN18113_c0_g4_i2.p1	cremanei@@@TRINITY_DN6760_c0_g1_i2.p1	ppacificus@@@TRINITY_DN21550_c0_g1_i1.p1
315	14	24	0.138	CEW1@@@TRINITY_DN13604_c0_g1_i1.p1	DF5006@@@TRINITY_DN16238_c0_g1_i1.p1	DF5012@@@TRINITY_DN16213_c0_g1_i1.p1	DF5112@@@TRINITY_DN2816_c0_g1_i1.p1	MT8872@@@TRINITY_DN5833_c0_g1_i1.p1	C53B7.4,K07A12.3	cbrenneri@@@TRINITY_DN2644_c0_g1_i1.p1,cbrenneri@@@TRINITY_DN8593_c0_g1_i1.p1,cbrenneri@@@TRINITY_DN8593_c0_g1_i2.p1	cbriggsae@@@TRINITY_DN108_c0_g2_i1.p1,cbriggsae@@@TRINITY_DN108_c0_g1_i1.p1	celegans@@@TRINITY_DN191_c0_g1_i1.p1,celegans@@@TRINITY_DN191_c0_g2_i1.p2	celegans@@@TRINITY_GG_5332_c0_g1_i1.p1,celegans@@@TRINITY_GG_10546_c0_g1_i1.p2	cinopinata@@@TRINITY_DN19775_c0_g1_i1.p2,cinopinata@@@TRINITY_DN6563_c0_g1_i1.p1	cjaponica@@@TRINITY_DN2854_c0_g1_i1.p1,cjaponica@@@TRINITY_DN23969_c0_g1_i1.p2	cremanei@@@TRINITY_DN6212_c0_g1_i1.p2,cremanei@@@TRINITY_DN14805_c0_g1_i1.p2	ppacificus@@@TRINITY_DN31800_c0_g1_i1.p1,ppacificus@@@TRINITY_DN349_c0_g1_i2.p1
316	14	24	0.133	CEW1@@@TRINITY_DN5340_c0_g1_i1.p1	DF5006@@@TRINITY_DN5171_c0_g1_i2.p1,DF5006@@@TRINITY_DN5171_c0_g1_i1.p1	DF5012@@@TRINITY_DN5733_c0_g1_i1.p1	DF5112@@@TRINITY_DN4904_c0_g1_i1.p1	MT8872@@@TRINITY_DN2845_c0_g1_i1.p1,MT8872@@@TRINITY_DN6032_c0_g1_i1.p1	C04F6.4a,K08F9.2	cbrenneri@@@TRINITY_DN922_c0_g1_i1.p1,cbrenneri@@@TRINITY_DN24413_c0_g1_i1.p1	cbriggsae@@@TRINITY_DN9550_c0_g1_i1.p1,cbriggsae@@@TRINITY_DN2169_c0_g1_i1.p1	celegans@@@TRINITY_DN4085_c0_g2_i1.p1,celegans@@@TRINITY_DN4085_c0_g1_i1.p1	celegans@@@TRINITY_GG_17219_c0_g1_i1.p1,celegans@@@TRINITY_GG_19147_c0_g1_i1.p1	cinopinata@@@TRINITY_DN8664_c0_g1_i1.p1,cinopinata@@@TRINITY_DN3660_c0_g1_i1.p1	cjaponica@@@TRINITY_DN23543_c0_g1_i1.p1	cremanei@@@TRINITY_DN2034_c0_g1_i1.p1,cremanei@@@TRINITY_DN2290_c0_g1_i1.p1,cremanei@@@TRINITY_DN2290_c0_g1_i2.p1	ppacificus@@@TRINITY_DN7830_c0_g1_i1.p1
317	14	24	0.128	CEW1@@@TRINITY_DN1766_c0_g1_i1.p1	DF5006@@@TRINITY_DN14874_c0_g1_i1.p1	DF5012@@@TRINITY_DN2862_c0_g1_i1.p1	DF5112@@@TRINITY_DN11055_c0_g1_i1.p1,DF5112@@@TRINITY_DN5141_c0_g1_i1.p1	MT8872@@@TRINITY_DN19409_c0_g1_i1.p1	F27C1.2a,F27C1.2b	cbrenneri@@@TRINITY_DN3714_c0_g1_i1.p1,cbrenneri@@@TRINITY_DN3714_c0_g1_i2.p1	cbriggsae@@@TRINITY_DN1110_c0_g1_i1.p1,cbriggsae@@@TRINITY_DN1110_c0_g1_i2.p1	celegans@@@TRINITY_DN655_c0_g1_i1.p1,celegans@@@TRINITY_DN655_c0_g1_i2.p1	celegans@@@TRINITY_GG_11715_c0_g1_i1.p1,celegans@@@TRINITY_GG_11715_c0_g1_i2.p1	cinopinata@@@TRINITY_DN533_c0_g1_i1.p1,cinopinata@@@TRINITY_DN533_c0_g1_i2.p1	cjaponica@@@TRINITY_DN1906_c0_g1_i2.p1,cjaponica@@@TRINITY_DN1906_c0_g1_i3.p1,cjaponica@@@TRINITY_DN22142_c0_g1_i1.p1	cremanei@@@TRINITY_DN1889_c0_g1_i1.p1,cremanei@@@TRINITY_DN1889_c0_g1_i2.p1	ppacificus@@@TRINITY_DN9987_c0_g1_i1.p1
318	14	24	0.124	CEW1@@@TRINITY_DN13239_c0_g1_i1.p1	DF5006@@@TRINITY_DN6575_c0_g1_i1.p1	DF5012@@@TRINITY_DN3535_c0_g1_i1.p1	DF5112@@@TRINITY_DN2086_c0_g1_i2.p1	MT8872@@@TRINITY_DN10156_c0_g1_i2.p1,MT8872@@@TRINITY_DN1967_c0_g1_i1.p1	T01B11.7,T01B11.5a	cbrenneri@@@TRINITY_DN6865_c0_g1_i1.p1,cbrenneri@@@TRINITY_DN6865_c0_g2_i1.p1	cbriggsae@@@TRINITY_DN689_c0_g1_i1.p1	celegans@@@TRINITY_DN18362_c0_g1_i1.p1,celegans@@@TRINITY_DN6992_c0_g1_i1.p1	celegans@@@TRINITY_GG_14823_c0_g1_i1.p1	cinopinata@@@TRINITY_DN2770_c0_g3_i1.p1,cinopinata@@@TRINITY_DN2770_c0_g1_i1.p1	cjaponica@@@TRINITY_DN933_c0_g3_i1.p1,cjaponica@@@TRINITY_DN933_c0_g1_i3.p1	cremanei@@@TRINITY_DN2824_c0_g1_i1.p1,cremanei@@@TRINITY_DN2824_c0_g1_i2.p1,cremanei@@@TRINITY_DN2824_c0_g2_i1.p1,cremanei@@@TRINITY_DN2824_c0_g2_i2.p1	ppacificus@@@TRINITY_DN2699_c1_g1_i4.p1,ppacificus@@@TRINITY_DN2699_c1_g1_i7.p1
319	14	24	0.114	CEW1@@@TRINITY_DN1617_c0_g1_i5.p1,CEW1@@@TRINITY_DN12258_c0_g1_i1.p1	DF5006@@@TRINITY_DN11436_c0_g1_i1.p1,DF5006@@@TRINITY_DN7131_c0_g1_i1.p1,DF5006@@@TRINITY_DN7131_c0_g1_i2.p1,DF5006@@@TRINITY_DN7131_c0_g1_i3.p1,DF5006@@@TRINITY_DN7131_c0_g1_i4.p1	DF5012@@@TRINITY_DN23777_c0_g1_i1.p1,DF5012@@@TRINITY_DN877_c0_g1_i1.p1,DF5012@@@TRINITY_DN877_c0_g1_i2.p1	DF5112@@@TRINITY_DN43_c0_g2_i1.p1	MT8872@@@TRINITY_DN4404_c0_g1_i1.p1	R12A1.4	cbrenneri@@@TRINITY_DN7501_c0_g2_i1.p1,cbrenneri@@@TRINITY_DN7501_c0_g2_i2.p1	cbriggsae@@@TRINITY_DN25219_c0_g1_i1.p1	celegans@@@TRINITY_DN19879_c0_g1_i1.p1	celegans@@@TRINITY_GG_18315_c0_g1_i1.p1	cinopinata@@@TRINITY_DN4394_c0_g1_i1.p1	cjaponica@@@TRINITY_DN9479_c0_g1_i1.p1	cremanei@@@TRINITY_DN547_c0_g1_i1.p1,cremanei@@@TRINITY_DN547_c0_g1_i3.p1,cremanei@@@TRINITY_DN547_c0_g1_i4.p1	ppacificus@@@TRINITY_DN56_c0_g1_i3.p1
320	14	24	0.108	CEW1@@@TRINITY_DN5138_c0_g1_i1.p1,CEW1@@@TRINITY_DN5138_c0_g1_i5.p1	DF5006@@@TRINITY_DN6708_c0_g1_i1.p1,DF5006@@@TRINITY_DN6708_c0_g1_i2.p1	DF5012@@@TRINITY_DN6059_c0_g1_i2.p1	DF5112@@@TRINITY_DN4901_c0_g1_i3.p1,DF5112@@@TRINITY_DN4901_c0_g1_i7.p1	MT8872@@@TRINITY_DN4413_c0_g1_i2.p1	K09G1.4a,K09G1.4d,K09G1.4g,K09G1.4e	cbrenneri@@@TRINITY_DN8404_c0_g1_i2.p1,cbrenneri@@@TRINITY_DN8404_c0_g1_i3.p1,cbrenneri@@@TRINITY_DN8404_c0_g1_i4.p1	cbriggsae@@@TRINITY_DN13842_c0_g1_i1.p1	celegans@@@TRINITY_DN9187_c0_g1_i2.p1	celegans@@@TRINITY_GG_7478_c0_g1_i2.p1	cinopinata@@@TRINITY_DN12184_c0_g1_i1.p1	cjaponica@@@TRINITY_DN7569_c0_g3_i2.p1	cremanei@@@TRINITY_DN8465_c0_g1_i1.p1,cremanei@@@TRINITY_DN8465_c0_g1_i5.p1	ppacificus@@@TRINITY_DN11587_c0_g1_i9.p1,ppacificus@@@TRINITY_DN11587_c0_g1_i3.p1
321	14	24	0.101	CEW1@@@TRINITY_DN5577_c0_g1_i2.p1	DF5006@@@TRINITY_DN6131_c0_g2_i1.p1	DF5012@@@TRINITY_DN1715_c3_g1_i3.p2	DF5112@@@TRINITY_DN3946_c0_g1_i1.p1	MT8872@@@TRINITY_DN5427_c0_g1_i1.p1	Y80D3A.9,R186.1	cbrenneri@@@TRINITY_DN3648_c0_g1_i1.p1,cbrenneri@@@TRINITY_DN4053_c0_g1_i1.p1	cbriggsae@@@TRINITY_DN7025_c0_g1_i1.p1,cbriggsae@@@TRINITY_DN17565_c0_g1_i1.p1	celegans@@@TRINITY_DN8101_c0_g1_i1.p1,celegans@@@TRINITY_DN9352_c0_g1_i1.p1	celegans@@@TRINITY_GG_17399_c2_g1_i1.p1,celegans@@@TRINITY_GG_18462_c0_g1_i1.p1	cinopinata@@@TRINITY_DN3480_c0_g3_i2.p1	cjaponica@@@TRINITY_DN47_c1_g2_i1.p1,cjaponica@@@TRINITY_DN9493_c0_g1_i4.p1	cremanei@@@TRINITY_DN1162_c0_g1_i2.p1,cremanei@@@TRINITY_DN4177_c0_g1_i1.p1,cremanei@@@TRINITY_DN4177_c0_g1_i3.p1	ppacificus@@@TRINITY_DN3091_c0_g1_i1.p1,ppacificus@@@TRINITY_DN3091_c0_g1_i3.p1,ppacificus@@@TRINITY_DN1376_c0_g1_i1.p1
322	14	23	0.726	CEW1@@@TRINITY_DN12938_c0_g1_i1.p1	DF5006@@@TRINITY_DN6437_c0_g1_i1.p1,DF5006@@@TRINITY_DN6437_c0_g1_i2.p1	DF5012@@@TRINITY_DN4544_c0_g1_i2.p1,DF5012@@@TRINITY_DN4544_c0_g1_i4.p1	DF5112@@@TRINITY_DN6704_c0_g1_i1.p1	MT8872@@@TRINITY_DN8400_c0_g1_i1.p1	F59F5.6	cbrenneri@@@TRINITY_DN6186_c0_g1_i1.p1,cbrenneri@@@TRINITY_DN6186_c0_g1_i2.p1	cbriggsae@@@TRINITY_DN6796_c0_g1_i1.p1,cbriggsae@@@TRINITY_DN6796_c0_g1_i2.p1	celegans@@@TRINITY_DN6084_c0_g1_i1.p1	celegans@@@TRINITY_GG_16562_c0_g1_i1.p1	cinopinata@@@TRINITY_DN4928_c0_g1_i1.p1,cinopinata@@@TRINITY_DN4928_c0_g1_i2.p1	cjaponica@@@TRINITY_DN7839_c0_g1_i1.p1,cjaponica@@@TRINITY_DN7839_c0_g1_i2.p1	cremanei@@@TRINITY_DN12043_c0_g1_i1.p1,cremanei@@@TRINITY_DN12043_c0_g1_i2.p1,cremanei@@@TRINITY_DN12043_c0_g1_i3.p1	ppacificus@@@TRINITY_DN2345_c0_g1_i2.p1,ppacificus@@@TRINITY_DN2345_c0_g1_i3.p1
323	14	23	0.726	CEW1@@@TRINITY_DN2668_c0_g1_i1.p1,CEW1@@@TRINITY_DN2668_c0_g1_i2.p1	DF5006@@@TRINITY_DN3265_c0_g1_i1.p1	DF5012@@@TRINITY_DN5143_c0_g1_i1.p1	DF5112@@@TRINITY_DN2285_c0_g1_i1.p1	MT8872@@@TRINITY_DN95_c0_g1_i1.p1,MT8872@@@TRINITY_DN95_c0_g1_i2.p1	R74.4a,R74.4b	cbrenneri@@@TRINITY_DN1920_c0_g1_i1.p1	cbriggsae@@@TRINITY_DN2686_c0_g1_i1.p1,cbriggsae@@@TRINITY_DN2686_c0_g1_i2.p1	celegans@@@TRINITY_DN2507_c0_g1_i1.p1,celegans@@@TRINITY_DN2507_c0_g1_i2.p1	celegans@@@TRINITY_GG_9520_c0_g1_i1.p1	cinopinata@@@TRINITY_DN740_c0_g1_i1.p1,cinopinata@@@TRINITY_DN740_c0_g1_i2.p1,cinopinata@@@TRINITY_DN740_c0_g1_i3.p1	cjaponica@@@TRINITY_DN311_c0_g2_i1.p1	cremanei@@@TRINITY_DN5686_c0_g1_i4.p1,cremanei@@@TRINITY_DN5686_c0_g1_i5.p1,cremanei@@@TRINITY_DN5686_c0_g1_i7.p1	ppacificus@@@TRINITY_DN7832_c0_g1_i1.p1
324	14	23	0.707	CEW1@@@TRINITY_DN2919_c0_g1_i1.p1,CEW1@@@TRINITY_DN2919_c0_g1_i2.p1	DF5006@@@TRINITY_DN15128_c0_g1_i1.p1	DF5012@@@TRINITY_DN2695_c0_g1_i2.p1,DF5012@@@TRINITY_DN2695_c0_g1_i3.p1	DF5112@@@TRINITY_DN2690_c0_g1_i3.p1	MT8872@@@TRINITY_DN7580_c0_g1_i1.p1	C16A3.1a,C16A3.1b,C16A3.1c	cbrenneri@@@TRINITY_DN6808_c0_g1_i1.p1	cbriggsae@@@TRINITY_DN6991_c0_g1_i1.p1	celegans@@@TRINITY_DN2205_c0_g1_i1.p1	celegans@@@TRINITY_GG_7931_c0_g1_i1.p1	cinopinata@@@TRINITY_DN4992_c0_g1_i1.p1,cinopinata@@@TRINITY_DN4992_c0_g1_i2.p1,cinopinata@@@TRINITY_DN4992_c0_g1_i4.p1,cinopinata@@@TRINITY_DN4992_c0_g1_i6.p1	cjaponica@@@TRINITY_DN1763_c2_g1_i2.p1,cjaponica@@@TRINITY_DN1763_c2_g1_i6.p1,cjaponica@@@TRINITY_DN1763_c2_g1_i7.p1	cremanei@@@TRINITY_DN4498_c0_g1_i1.p1	ppacificus@@@TRINITY_DN6592_c0_g1_i2.p1
325	14	23	0.695	CEW1@@@TRINITY_DN655_c0_g1_i1.p1,CEW1@@@TRINITY_DN655_c0_g1_i2.p1	DF5006@@@TRINITY_DN5443_c0_g1_i1.p1,DF5006@@@TRINITY_DN5443_c0_g1_i2.p1	DF5012@@@TRINITY_DN2144_c0_g1_i1.p1,DF5012@@@TRINITY_DN2144_c0_g1_i2.p1,DF5012@@@TRINITY_DN2144_c0_g1_i3.p1	DF5112@@@TRINITY_DN1607_c0_g1_i1.p1,DF5112@@@TRINITY_DN1607_c0_g1_i2.p1	MT8872@@@TRINITY_DN1584_c0_g1_i2.p1	ZK256.1c,ZK256.1a	cbrenneri@@@TRINITY_DN9119_c0_g1_i1.p1,cbrenneri@@@TRINITY_DN9119_c0_g1_i2.p1	cbriggsae@@@TRINITY_DN2653_c0_g1_i1.p1,cbriggsae@@@TRINITY_DN2653_c0_g1_i2.p1	celegans@@@TRINITY_DN2261_c0_g1_i1.p1	celegans@@@TRINITY_GG_11487_c0_g1_i1.p1	cinopinata@@@TRINITY_DN2412_c0_g1_i3.p1	cjaponica@@@TRINITY_DN2913_c0_g1_i1.p1	cremanei@@@TRINITY_DN4348_c0_g1_i1.p1	ppacificus@@@TRINITY_DN3839_c0_g1_i1.p1,ppacificus@@@TRINITY_DN3839_c0_g1_i3.p1
326	14	23	0.661	CEW1@@@TRINITY_DN1205_c0_g1_i1.p1,CEW1@@@TRINITY_DN1205_c0_g1_i6.p1,CEW1@@@TRINITY_DN1205_c0_g1_i7.p1	DF5006@@@TRINITY_DN13298_c0_g1_i1.p1	DF5012@@@TRINITY_DN611_c0_g1_i1.p1,DF5012@@@TRINITY_DN611_c0_g1_i2.p1	DF5112@@@TRINITY_DN12054_c0_g1_i1.p1	MT8872@@@TRINITY_DN910_c0_g1_i1.p1	T14G10.5a,T14G10.5b,T14G10.5c,T14G10.5d	cbrenneri@@@TRINITY_DN12108_c0_g1_i1.p1	cbriggsae@@@TRINITY_DN2552_c0_g1_i1.p1	celegans@@@TRINITY_DN1028_c0_g1_i1.p1	celegans@@@TRINITY_GG_3416_c0_g1_i1.p1	cinopinata@@@TRINITY_DN1711_c0_g1_i1.p1	cjaponica@@@TRINITY_DN2424_c0_g1_i1.p1,cjaponica@@@TRINITY_DN2424_c0_g1_i2.p1	cremanei@@@TRINITY_DN7776_c0_g1_i2.p1,cremanei@@@TRINITY_DN7776_c0_g1_i3.p1	ppacificus@@@TRINITY_DN5526_c0_g1_i1.p1,ppacificus@@@TRINITY_DN5526_c0_g1_i2.p1
327	14	23	0.652	CEW1@@@TRINITY_DN626_c0_g1_i1.p1	DF5006@@@TRINITY_DN5220_c0_g1_i1.p1	DF5012@@@TRINITY_DN1286_c0_g1_i1.p1,DF5012@@@TRINITY_DN1286_c0_g1_i2.p1	DF5112@@@TRINITY_DN178_c0_g1_i1.p1	MT8872@@@TRINITY_DN410_c0_g1_i2.p1,MT8872@@@TRINITY_DN410_c0_g1_i4.p1	Y116F11B.12a	cbrenneri@@@TRINITY_DN18681_c0_g1_i1.p1	cbriggsae@@@TRINITY_DN11458_c0_g1_i2.p1	celegans@@@TRINITY_DN3145_c0_g1_i1.p1	celegans@@@TRINITY_GG_17482_c0_g1_i1.p1	cinopinata@@@TRINITY_DN904_c1_g1_i2.p1,cinopinata@@@TRINITY_DN904_c1_g1_i4.p1,cinopinata@@@TRINITY_DN904_c1_g1_i6.p1	cjaponica@@@TRINITY_DN3891_c0_g1_i1.p1	cremanei@@@TRINITY_DN10141_c0_g2_i1.p1,cremanei@@@TRINITY_DN10141_c0_g2_i2.p1,cremanei@@@TRINITY_DN10141_c0_g2_i4.p1,cremanei@@@TRINITY_DN10141_c0_g2_i5.p1,cremanei@@@TRINITY_DN10141_c0_g2_i6.p1	ppacificus@@@TRINITY_DN7120_c0_g2_i1.p1,ppacificus@@@TRINITY_DN7120_c0_g2_i2.p1
328	14	23	0.644	CEW1@@@TRINITY_DN6351_c0_g1_i1.p1	DF5006@@@TRINITY_DN16648_c0_g1_i1.p1	DF5012@@@TRINITY_DN15659_c0_g1_i1.p1	DF5112@@@TRINITY_DN1778_c0_g1_i1.p1	MT8872@@@TRINITY_DN20692_c0_g1_i1.p1	K02A11.1a,K02A11.1b	cbrenneri@@@TRINITY_DN1962_c0_g1_i1.p1,cbrenneri@@@TRINITY_DN1962_c0_g1_i2.p1	cbriggsae@@@TRINITY_DN640_c0_g1_i1.p1,cbriggsae@@@TRINITY_DN640_c0_g1_i2.p1	celegans@@@TRINITY_DN607_c0_g2_i2.p1,celegans@@@TRINITY_DN607_c0_g2_i1.p1	celegans@@@TRINITY_GG_11105_c0_g1_i1.p1,celegans@@@TRINITY_GG_11105_c0_g1_i2.p1	cinopinata@@@TRINITY_DN1873_c0_g1_i1.p1,cinopinata@@@TRINITY_DN1873_c0_g1_i2.p1	cjaponica@@@TRINITY_DN3791_c0_g1_i1.p1	cremanei@@@TRINITY_DN16231_c0_g1_i1.p1,cremanei@@@TRINITY_DN16231_c0_g1_i2.p1,cremanei@@@TRINITY_DN16231_c0_g1_i3.p1,cremanei@@@TRINITY_DN16231_c0_g1_i4.p1	ppacificus@@@TRINITY_DN1095_c0_g1_i1.p1
329	14	23	0.637	CEW1@@@TRINITY_DN722_c0_g1_i1.p1	DF5006@@@TRINITY_DN4437_c0_g1_i1.p1,DF5006@@@TRINITY_DN4437_c0_g1_i2.p1	DF5012@@@TRINITY_DN24094_c0_g1_i1.p1	DF5112@@@TRINITY_DN11016_c0_g1_i1.p1	MT8872@@@TRINITY_DN1639_c0_g1_i1.p1,MT8872@@@TRINITY_DN1639_c0_g1_i2.p1	T20D3.7a,T20D3.7b,T20D3.7c,T20D3.7d	cbrenneri@@@TRINITY_DN1634_c0_g1_i1.p1,cbrenneri@@@TRINITY_DN1634_c0_g1_i3.p1	cbriggsae@@@TRINITY_DN3258_c0_g2_i1.p1	celegans@@@TRINITY_DN3912_c0_g1_i1.p1	celegans@@@TRINITY_GG_15221_c0_g1_i1.p1	cinopinata@@@TRINITY_DN1304_c0_g1_i1.p1	cjaponica@@@TRINITY_DN1853_c0_g1_i1.p1,cjaponica@@@TRINITY_DN1853_c0_g1_i2.p1	cremanei@@@TRINITY_DN2695_c0_g2_i1.p1,cremanei@@@TRINITY_DN2695_c0_g2_i2.p1,cremanei@@@TRINITY_DN2695_c0_g2_i3.p1	ppacificus@@@TRINITY_DN1514_c0_g1_i1.p1
330	14	23	0.637	CEW1@@@TRINITY_DN813_c0_g1_i3.p1,CEW1@@@TRINITY_DN813_c0_g1_i4.p1	DF5006@@@TRINITY_DN4683_c0_g1_i1.p1	DF5012@@@TRINITY_DN2919_c0_g1_i1.p1	DF5112@@@TRINITY_DN1372_c0_g1_i1.p1,DF5112@@@TRINITY_DN1372_c0_g1_i2.p1	MT8872@@@TRINITY_DN1114_c0_g1_i1.p1,MT8872@@@TRINITY_DN1114_c0_g1_i2.p1	T10C6.6a,T10C6.6c,T10C6.6e,T10C6.6f	cbrenneri@@@TRINITY_DN4242_c0_g3_i1.p1,cbrenneri@@@TRINITY_DN4242_c0_g3_i2.p1	cbriggsae@@@TRINITY_DN399_c0_g1_i1.p1	celegans@@@TRINITY_DN1246_c0_g1_i1.p1	celegans@@@TRINITY_GG_5820_c0_g1_i1.p1	cinopinata@@@TRINITY_DN1220_c0_g1_i1.p1,cinopinata@@@TRINITY_DN1220_c0_g1_i2.p1,cinopinata@@@TRINITY_DN1220_c0_g1_i3.p1	cjaponica@@@TRINITY_DN2142_c0_g1_i1.p1	cremanei@@@TRINITY_DN3646_c0_g1_i1.p1	ppacificus@@@TRINITY_DN2668_c0_g1_i1.p1
331	14	23	0.636	CEW1@@@TRINITY_DN18107_c0_g1_i1.p1	DF5006@@@TRINITY_DN3209_c0_g1_i1.p1,DF5006@@@TRINITY_DN3209_c0_g1_i2.p1	DF5012@@@TRINITY_DN1970_c0_g1_i1.p1	DF5112@@@TRINITY_DN2152_c0_g1_i1.p1,DF5112@@@TRINITY_DN2152_c0_g1_i2.p1	MT8872@@@TRINITY_DN14610_c0_g1_i1.p1	R02D3.1a,R02D3.1b	cbrenneri@@@TRINITY_DN2747_c0_g1_i1.p1,cbrenneri@@@TRINITY_DN2747_c0_g1_i2.p1	cbriggsae@@@TRINITY_DN2285_c0_g1_i1.p1,cbriggsae@@@TRINITY_DN2285_c0_g1_i2.p1	celegans@@@TRINITY_DN19999_c0_g1_i1.p1	celegans@@@TRINITY_GG_3345_c0_g1_i1.p1	cinopinata@@@TRINITY_DN324_c0_g1_i1.p1,cinopinata@@@TRINITY_DN324_c0_g1_i2.p1	cjaponica@@@TRINITY_DN588_c0_g1_i1.p1,cjaponica@@@TRINITY_DN588_c0_g1_i2.p1	cremanei@@@TRINITY_DN1944_c0_g1_i3.p1,cremanei@@@TRINITY_DN1944_c0_g1_i4.p1,cremanei@@@TRINITY_DN1944_c0_g1_i5.p1	ppacificus@@@TRINITY_DN4732_c0_g1_i1.p1
332	14	23	0.632	CEW1@@@TRINITY_DN446_c0_g1_i1.p1,CEW1@@@TRINITY_DN446_c0_g1_i2.p1	DF5006@@@TRINITY_DN523_c0_g1_i1.p1,DF5006@@@TRINITY_DN523_c0_g1_i2.p1	DF5012@@@TRINITY_DN810_c0_g2_i1.p1,DF5012@@@TRINITY_DN810_c0_g2_i2.p1	DF5112@@@TRINITY_DN5732_c0_g1_i1.p1	MT8872@@@TRINITY_DN2872_c0_g1_i1.p1	T12E12.4a,T12E12.4b	cbrenneri@@@TRINITY_DN866_c0_g1_i1.p1,cbrenneri@@@TRINITY_DN866_c0_g1_i2.p1	cbriggsae@@@TRINITY_DN981_c0_g1_i1.p1,cbriggsae@@@TRINITY_DN981_c0_g1_i2.p1	celegans@@@TRINITY_DN2275_c0_g1_i1.p1,celegans@@@TRINITY_DN2275_c0_g1_i2.p1	celegans@@@TRINITY_GG_3372_c0_g1_i1.p1,celegans@@@TRINITY_GG_3372_c0_g1_i2.p1	cinopinata@@@TRINITY_DN20254_c0_g1_i1.p1	cjaponica@@@TRINITY_DN1461_c0_g1_i1.p1	cremanei@@@TRINITY_DN1626_c0_g1_i1.p1,cremanei@@@TRINITY_DN1626_c0_g1_i2.p1	ppacificus@@@TRINITY_DN5279_c0_g1_i1.p1
333	14	23	0.627	CEW1@@@TRINITY_DN1230_c0_g1_i1.p1,CEW1@@@TRINITY_DN1230_c0_g1_i2.p1	DF5006@@@TRINITY_DN56_c0_g4_i1.p1,DF5006@@@TRINITY_DN56_c0_g4_i2.p1	DF5012@@@TRINITY_DN3957_c0_g1_i1.p1	DF5112@@@TRINITY_DN495_c0_g1_i2.p1	MT8872@@@TRINITY_DN3080_c0_g1_i1.p1	T08B1.1b,T08B1.1a	cbrenneri@@@TRINITY_DN2504_c0_g1_i1.p1,cbrenneri@@@TRINITY_DN2504_c0_g1_i2.p1	cbriggsae@@@TRINITY_DN984_c0_g1_i1.p1,cbriggsae@@@TRINITY_DN984_c0_g1_i2.p1	celegans@@@TRINITY_DN935_c0_g2_i1.p1,celegans@@@TRINITY_DN935_c0_g2_i2.p1	celegans@@@TRINITY_GG_17988_c0_g1_i1.p1,celegans@@@TRINITY_GG_17988_c0_g1_i2.p1	cinopinata@@@TRINITY_DN1347_c0_g1_i2.p1	cjaponica@@@TRINITY_DN1410_c0_g1_i1.p1,cjaponica@@@TRINITY_DN1410_c0_g1_i2.p1	cremanei@@@TRINITY_DN2703_c0_g1_i1.p1,cremanei@@@TRINITY_DN2703_c0_g1_i2.p1	ppacificus@@@TRINITY_DN3869_c0_g2_i1.p1
334	14	23	0.612	CEW1@@@TRINITY_DN15080_c0_g1_i1.p1,CEW1@@@TRINITY_DN618_c0_g2_i1.p1,CEW1@@@TRINITY_DN618_c0_g2_i14.p1,CEW1@@@TRINITY_DN618_c0_g2_i2.p1,CEW1@@@TRINITY_DN618_c0_g2_i6.p1,CEW1@@@TRINITY_DN618_c0_g2_i8.p1	DF5006@@@TRINITY_DN2549_c0_g1_i1.p1,DF5006@@@TRINITY_DN2549_c0_g1_i2.p1,DF5006@@@TRINITY_DN2549_c0_g1_i3.p1	DF5012@@@TRINITY_DN2832_c0_g1_i3.p1,DF5012@@@TRINITY_DN2832_c0_g1_i4.p1	DF5112@@@TRINITY_DN3517_c0_g1_i1.p1	MT8872@@@TRINITY_DN1390_c0_g1_i1.p1	C10C6.5	cbrenneri@@@TRINITY_DN2080_c0_g1_i1.p1	cbriggsae@@@TRINITY_DN2419_c0_g1_i1.p1	celegans@@@TRINITY_DN19884_c0_g1_i1.p1	celegans@@@TRINITY_GG_2132_c0_g1_i1.p1	cinopinata@@@TRINITY_DN6162_c0_g1_i1.p1	cjaponica@@@TRINITY_DN9495_c0_g1_i1.p1	cremanei@@@TRINITY_DN2362_c0_g1_i1.p1	ppacificus@@@TRINITY_DN174_c0_g2_i3.p1,ppacificus@@@TRINITY_DN174_c0_g2_i5.p1
335	14	23	0.596	CEW1@@@TRINITY_DN58_c0_g1_i2.p1	DF5006@@@TRINITY_DN4763_c0_g1_i1.p1,DF5006@@@TRINITY_DN4763_c0_g1_i5.p1	DF5012@@@TRINITY_DN55_c0_g1_i3.p1,DF5012@@@TRINITY_DN55_c0_g1_i5.p1,DF5012@@@TRINITY_DN55_c0_g1_i9.p1	DF5112@@@TRINITY_DN76_c0_g1_i2.p1	MT8872@@@TRINITY_DN286_c0_g1_i2.p1	Y39E4B.12a,Y39E4B.12b,Y39E4B.12c	cbrenneri@@@TRINITY_DN5086_c0_g1_i1.p1,cbrenneri@@@TRINITY_DN5086_c0_g1_i3.p1,cbrenneri@@@TRINITY_DN5086_c0_g1_i4.p1	cbriggsae@@@TRINITY_DN5260_c0_g1_i3.p1,cbriggsae@@@TRINITY_DN5260_c0_g1_i6.p1	celegans@@@TRINITY_DN1976_c0_g3_i1.p1	celegans@@@TRINITY_GG_8189_c0_g1_i1.p1	cinopinata@@@TRINITY_DN535_c0_g3_i1.p1	cjaponica@@@TRINITY_DN1316_c0_g2_i1.p1	cremanei@@@TRINITY_DN2496_c0_g1_i1.p1,cremanei@@@TRINITY_DN2496_c0_g1_i2.p1	ppacificus@@@TRINITY_DN2272_c0_g1_i3.p1
336	14	23	0.584	CEW1@@@TRINITY_DN2204_c0_g1_i1.p1,CEW1@@@TRINITY_DN2204_c0_g1_i2.p1	DF5006@@@TRINITY_DN1220_c0_g1_i1.p1,DF5006@@@TRINITY_DN1220_c0_g1_i2.p1	DF5012@@@TRINITY_DN5046_c0_g1_i1.p1	DF5112@@@TRINITY_DN1257_c0_g1_i1.p1,DF5112@@@TRINITY_DN1257_c0_g1_i2.p1	MT8872@@@TRINITY_DN4667_c0_g1_i1.p1	F02E9.7	cbrenneri@@@TRINITY_DN2706_c0_g1_i1.p1,cbrenneri@@@TRINITY_DN2706_c0_g1_i2.p1	cbriggsae@@@TRINITY_DN5599_c0_g3_i1.p1	celegans@@@TRINITY_DN3467_c0_g1_i1.p1,celegans@@@TRINITY_DN3467_c0_g1_i3.p1	celegans@@@TRINITY_GG_11157_c0_g1_i1.p1,celegans@@@TRINITY_GG_11157_c0_g1_i2.p1	cinopinata@@@TRINITY_DN792_c0_g1_i1.p1,cinopinata@@@TRINITY_DN792_c0_g1_i2.p1,cinopinata@@@TRINITY_DN792_c0_g1_i3.p1	cjaponica@@@TRINITY_DN5237_c0_g1_i2.p1,cjaponica@@@TRINITY_DN5237_c0_g1_i3.p1	cremanei@@@TRINITY_DN25883_c0_g2_i2.p1	ppacificus@@@TRINITY_DN5771_c0_g1_i1.p1
337	14	23	0.578	CEW1@@@TRINITY_DN617_c0_g1_i1.p1,CEW1@@@TRINITY_DN617_c0_g1_i2.p1	DF5006@@@TRINITY_DN2308_c0_g1_i1.p1	DF5012@@@TRINITY_DN7283_c0_g1_i1.p1	DF5112@@@TRINITY_DN3429_c0_g1_i1.p1	MT8872@@@TRINITY_DN5237_c0_g1_i1.p1	F26E4.1	cbrenneri@@@TRINITY_DN3463_c0_g1_i1.p1	cbriggsae@@@TRINITY_DN791_c0_g2_i1.p1,cbriggsae@@@TRINITY_DN791_c0_g2_i2.p1,cbriggsae@@@TRINITY_DN791_c0_g2_i3.p1,cbriggsae@@@TRINITY_DN791_c0_g2_i4.p1,cbriggsae@@@TRINITY_DN791_c0_g2_i5.p1,cbriggsae@@@TRINITY_DN791_c0_g2_i7.p1	celegans@@@TRINITY_DN22032_c0_g1_i1.p1	celegans@@@TRINITY_GG_11107_c0_g1_i1.p1	cinopinata@@@TRINITY_DN3110_c0_g1_i1.p1	cjaponica@@@TRINITY_DN6668_c0_g1_i1.p1	cremanei@@@TRINITY_DN1805_c0_g1_i1.p1,cremanei@@@TRINITY_DN1805_c0_g1_i2.p1,cremanei@@@TRINITY_DN1805_c0_g1_i3.p1	ppacificus@@@TRINITY_DN2499_c0_g1_i1.p1,ppacificus@@@TRINITY_DN2499_c0_g1_i2.p1
338	14	23	0.536	CEW1@@@TRINITY_DN2284_c0_g1_i1.p1	DF5006@@@TRINITY_DN531_c0_g1_i1.p1,DF5006@@@TRINITY_DN531_c0_g1_i2.p1,DF5006@@@TRINITY_DN531_c0_g1_i3.p1,DF5006@@@TRINITY_DN531_c0_g1_i4.p1,DF5006@@@TRINITY_DN531_c0_g1_i6.p1	DF5012@@@TRINITY_DN808_c0_g1_i2.p1,DF5012@@@TRINITY_DN808_c0_g1_i3.p1	DF5112@@@TRINITY_DN1417_c0_g2_i1.p1	MT8872@@@TRINITY_DN20630_c0_g1_i1.p1	C43G2.2a,C43G2.2b	cbrenneri@@@TRINITY_DN2209_c0_g1_i2.p1	cbriggsae@@@TRINITY_DN6472_c0_g1_i1.p1	celegans@@@TRINITY_DN3266_c0_g2_i1.p1,celegans@@@TRINITY_DN3266_c0_g2_i2.p1	celegans@@@TRINITY_GG_14348_c0_g1_i1.p1,celegans@@@TRINITY_GG_14348_c0_g1_i2.p1	cinopinata@@@TRINITY_DN3989_c0_g1_i1.p1	cjaponica@@@TRINITY_DN9051_c0_g1_i1.p1	cremanei@@@TRINITY_DN6815_c0_g1_i3.p1,cremanei@@@TRINITY_DN6815_c0_g1_i4.p1	ppacificus@@@TRINITY_DN19031_c0_g1_i1.p1
339	14	23	0.514	CEW1@@@TRINITY_DN1430_c0_g1_i1.p1,CEW1@@@TRINITY_DN1430_c0_g1_i2.p1	DF5006@@@TRINITY_DN1209_c0_g1_i2.p1	DF5012@@@TRINITY_DN10979_c0_g1_i1.p1	DF5112@@@TRINITY_DN5142_c0_g1_i1.p1	MT8872@@@TRINITY_DN3099_c0_g1_i1.p1,MT8872@@@TRINITY_DN3099_c0_g1_i2.p1	R06A4.4a,R06A4.4c	cbrenneri@@@TRINITY_DN1267_c0_g2_i1.p1,cbrenneri@@@TRINITY_DN1267_c0_g2_i2.p1	cbriggsae@@@TRINITY_DN3222_c0_g1_i1.p1	celegans@@@TRINITY_DN772_c0_g1_i1.p1,celegans@@@TRINITY_DN772_c0_g1_i2.p1	celegans@@@TRINITY_GG_944_c0_g1_i1.p1,celegans@@@TRINITY_GG_944_c0_g1_i2.p1	cinopinata@@@TRINITY_DN1150_c0_g1_i2.p1,cinopinata@@@TRINITY_DN1150_c0_g1_i1.p1	cjaponica@@@TRINITY_DN1212_c0_g1_i1.p1,cjaponica@@@TRINITY_DN1212_c0_g1_i2.p1,cjaponica@@@TRINITY_DN1212_c0_g1_i3.p1	cremanei@@@TRINITY_DN969_c0_g1_i6.p1	ppacificus@@@TRINITY_DN2818_c0_g1_i1.p1
340	14	23	0.508	CEW1@@@TRINITY_DN15071_c0_g1_i1.p1	DF5006@@@TRINITY_DN16734_c0_g1_i1.p1	DF5012@@@TRINITY_DN19797_c0_g1_i1.p1	DF5112@@@TRINITY_DN14452_c0_g1_i1.p1	MT8872@@@TRINITY_DN18962_c0_g1_i1.p1	F40B5.2a,F40B5.2b	cbrenneri@@@TRINITY_DN3278_c0_g1_i2.p1,cbrenneri@@@TRINITY_DN3278_c0_g1_i3.p1	cbriggsae@@@TRINITY_DN1255_c0_g1_i2.p1,cbriggsae@@@TRINITY_DN1255_c0_g1_i1.p1	celegans@@@TRINITY_DN1019_c0_g1_i3.p1,celegans@@@TRINITY_DN1019_c0_g1_i1.p1	celegans@@@TRINITY_GG_5301_c0_g1_i1.p1,celegans@@@TRINITY_GG_5301_c0_g1_i3.p1	cinopinata@@@TRINITY_DN1184_c0_g1_i1.p1,cinopinata@@@TRINITY_DN1184_c0_g1_i2.p1	cjaponica@@@TRINITY_DN1732_c0_g1_i1.p1,cjaponica@@@TRINITY_DN1732_c0_g1_i4.p1	cremanei@@@TRINITY_DN742_c0_g1_i2.p1,cremanei@@@TRINITY_DN742_c0_g1_i1.p1	ppacificus@@@TRINITY_DN5215_c0_g1_i1.p1,ppacificus@@@TRINITY_DN5215_c0_g1_i2.p1
341	14	23	0.501	CEW1@@@TRINITY_DN6041_c0_g1_i2.p1	DF5006@@@TRINITY_DN13759_c0_g1_i1.p1	DF5012@@@TRINITY_DN10572_c0_g1_i1.p1	DF5112@@@TRINITY_DN5362_c0_g1_i1.p1	MT8872@@@TRINITY_DN2654_c0_g1_i2.p1	Y62E10A.13a,Y62E10A.13b,Y62E10A.13g,Y62E10A.13h,Y62E10A.13c,Y62E10A.13e,Y62E10A.13f	cbrenneri@@@TRINITY_DN1630_c0_g1_i2.p1,cbrenneri@@@TRINITY_DN1630_c0_g1_i3.p1	cbriggsae@@@TRINITY_DN1403_c0_g1_i1.p1	celegans@@@TRINITY_DN8562_c0_g1_i1.p1	celegans@@@TRINITY_GG_14926_c0_g1_i1.p1	cinopinata@@@TRINITY_DN3306_c0_g2_i2.p1	cjaponica@@@TRINITY_DN591_c1_g1_i1.p1,cjaponica@@@TRINITY_DN591_c1_g1_i2.p1	cremanei@@@TRINITY_DN599_c0_g1_i4.p1	ppacificus@@@TRINITY_DN7563_c0_g1_i1.p1,ppacificus@@@TRINITY_DN7563_c0_g1_i2.p1
342	14	23	0.493	CEW1@@@TRINITY_DN1647_c0_g1_i1.p1,CEW1@@@TRINITY_DN1647_c0_g1_i2.p1,CEW1@@@TRINITY_DN1647_c0_g1_i3.p1	DF5006@@@TRINITY_DN2719_c0_g1_i1.p1,DF5006@@@TRINITY_DN2719_c0_g1_i2.p1,DF5006@@@TRINITY_DN2719_c0_g1_i3.p1,DF5006@@@TRINITY_DN2719_c0_g1_i4.p1	DF5012@@@TRINITY_DN3706_c0_g1_i1.p1	DF5112@@@TRINITY_DN2564_c0_g1_i1.p1	MT8872@@@TRINITY_DN3747_c0_g1_i1.p1	C32F10.8a	cbrenneri@@@TRINITY_DN1597_c0_g1_i1.p1	cbriggsae@@@TRINITY_DN1468_c0_g2_i3.p1,cbriggsae@@@TRINITY_DN1468_c0_g2_i1.p1	celegans@@@TRINITY_DN1386_c0_g1_i1.p1	celegans@@@TRINITY_GG_23216_c0_g1_i1.p1	cinopinata@@@TRINITY_DN3376_c0_g2_i1.p1,cinopinata@@@TRINITY_DN3376_c0_g2_i2.p1	cjaponica@@@TRINITY_DN1878_c0_g1_i1.p1,cjaponica@@@TRINITY_DN1878_c0_g1_i2.p1	cremanei@@@TRINITY_DN3220_c0_g2_i1.p1,cremanei@@@TRINITY_DN3220_c0_g2_i2.p1	ppacificus@@@TRINITY_DN26742_c0_g1_i1.p1
343	14	23	0.478	CEW1@@@TRINITY_DN6223_c0_g1_i1.p1	DF5006@@@TRINITY_DN688_c0_g1_i1.p1	DF5012@@@TRINITY_DN1495_c0_g1_i1.p2,DF5012@@@TRINITY_DN1495_c0_g1_i2.p2	DF5112@@@TRINITY_DN4121_c0_g1_i1.p1	MT8872@@@TRINITY_DN3382_c0_g1_i1.p1	Y116A8A.9a,Y116A8A.9b	cbrenneri@@@TRINITY_DN6010_c0_g1_i1.p1,cbrenneri@@@TRINITY_DN6010_c0_g1_i2.p1	cbriggsae@@@TRINITY_DN4515_c0_g1_i1.p1,cbriggsae@@@TRINITY_DN4515_c0_g1_i3.p1	celegans@@@TRINITY_DN777_c1_g1_i2.p1,celegans@@@TRINITY_DN777_c1_g1_i1.p1	celegans@@@TRINITY_GG_13949_c1_g1_i1.p1	cinopinata@@@TRINITY_DN4017_c0_g1_i1.p1	cjaponica@@@TRINITY_DN4392_c0_g1_i2.p1,cjaponica@@@TRINITY_DN4392_c0_g1_i1.p1	cremanei@@@TRINITY_DN555_c0_g1_i2.p1,cremanei@@@TRINITY_DN555_c0_g1_i3.p1,cremanei@@@TRINITY_DN555_c0_g1_i4.p1	ppacificus@@@TRINITY_DN8051_c0_g3_i2.p1,ppacificus@@@TRINITY_DN8051_c0_g3_i3.p1
344	14	23	0.452	CEW1@@@TRINITY_DN3370_c0_g1_i1.p1	DF5006@@@TRINITY_DN374_c0_g1_i1.p1,DF5006@@@TRINITY_DN374_c0_g1_i2.p1,DF5006@@@TRINITY_DN374_c0_g1_i3.p1,DF5006@@@TRINITY_DN374_c0_g1_i4.p1,DF5006@@@TRINITY_DN374_c0_g1_i6.p1,DF5006@@@TRINITY_DN374_c0_g1_i7.p1	DF5012@@@TRINITY_DN3019_c0_g3_i1.p1,DF5012@@@TRINITY_DN3019_c0_g3_i2.p1,DF5012@@@TRINITY_DN3019_c0_g3_i3.p1	DF5112@@@TRINITY_DN2695_c0_g1_i1.p1	MT8872@@@TRINITY_DN2733_c1_g1_i1.p1	C47A10.1	cbrenneri@@@TRINITY_DN5042_c0_g1_i1.p1	cbriggsae@@@TRINITY_DN3990_c0_g1_i1.p1	celegans@@@TRINITY_DN5935_c0_g1_i1.p1	celegans@@@TRINITY_GG_6611_c0_g1_i1.p1	cinopinata@@@TRINITY_DN1052_c0_g1_i1.p1	cjaponica@@@TRINITY_DN1187_c0_g2_i1.p1,cjaponica@@@TRINITY_DN1187_c0_g2_i3.p1,cjaponica@@@TRINITY_DN1187_c0_g2_i2.p1	cremanei@@@TRINITY_DN1285_c0_g1_i1.p1	ppacificus@@@TRINITY_DN5577_c0_g1_i3.p1
345	14	23	0.439	CEW1@@@TRINITY_DN69_c0_g1_i3.p1,CEW1@@@TRINITY_DN69_c0_g1_i1.p1,CEW1@@@TRINITY_DN69_c0_g1_i4.p1,CEW1@@@TRINITY_DN69_c0_g1_i5.p1	DF5006@@@TRINITY_DN11952_c0_g1_i1.p1	DF5012@@@TRINITY_DN4277_c0_g1_i2.p1	DF5112@@@TRINITY_DN992_c0_g1_i1.p1	MT8872@@@TRINITY_DN1655_c0_g1_i1.p1,MT8872@@@TRINITY_DN1655_c0_g1_i4.p1	T19B4.7	cbrenneri@@@TRINITY_DN2143_c0_g1_i1.p1,cbrenneri@@@TRINITY_DN2143_c0_g1_i2.p1,cbrenneri@@@TRINITY_DN2143_c0_g1_i3.p1	cbriggsae@@@TRINITY_DN5482_c0_g1_i1.p1,cbriggsae@@@TRINITY_DN5482_c0_g1_i2.p1	celegans@@@TRINITY_DN2817_c0_g1_i2.p1	celegans@@@TRINITY_GG_23222_c0_g1_i1.p1	cinopinata@@@TRINITY_DN2707_c0_g1_i1.p1,cinopinata@@@TRINITY_DN2707_c0_g1_i2.p1	cjaponica@@@TRINITY_DN8449_c0_g1_i5.p1,cjaponica@@@TRINITY_DN8449_c0_g1_i6.p1	cremanei@@@TRINITY_DN3263_c0_g1_i3.p1	ppacificus@@@TRINITY_DN4091_c0_g2_i3.p1
346	14	23	0.415	CEW1@@@TRINITY_DN1625_c0_g1_i1.p1	DF5006@@@TRINITY_DN4032_c0_g1_i1.p1	DF5012@@@TRINITY_DN5527_c0_g1_i1.p1,DF5012@@@TRINITY_DN5527_c0_g1_i2.p1,DF5012@@@TRINITY_DN5527_c0_g1_i3.p1,DF5012@@@TRINITY_DN5527_c0_g1_i4.p1,DF5012@@@TRINITY_DN5527_c0_g1_i5.p1,DF5012@@@TRINITY_DN5527_c0_g1_i6.p1	DF5112@@@TRINITY_DN2020_c0_g1_i2.p1	MT8872@@@TRINITY_DN5627_c0_g1_i1.p1	D2021.1a,D2021.1b	cbrenneri@@@TRINITY_DN15288_c0_g1_i1.p1,cbrenneri@@@TRINITY_DN15288_c0_g1_i2.p1	cbriggsae@@@TRINITY_DN4276_c0_g1_i1.p1	celegans@@@TRINITY_DN3633_c0_g1_i1.p1	celegans@@@TRINITY_GG_5314_c0_g1_i1.p1	cinopinata@@@TRINITY_DN11471_c0_g2_i2.p1	cjaponica@@@TRINITY_DN10108_c0_g1_i1.p1,cjaponica@@@TRINITY_DN10108_c0_g1_i2.p1	cremanei@@@TRINITY_DN16851_c0_g2_i1.p1,cremanei@@@TRINITY_DN16851_c0_g2_i2.p1	ppacificus@@@TRINITY_DN867_c0_g1_i1.p1
347	14	23	0.397	CEW1@@@TRINITY_DN2925_c0_g1_i1.p1	DF5006@@@TRINITY_DN4666_c0_g1_i1.p1	DF5012@@@TRINITY_DN5302_c0_g1_i1.p1	DF5112@@@TRINITY_DN1903_c0_g1_i1.p1	MT8872@@@TRINITY_DN9261_c0_g1_i1.p1	F46F11.10	cbrenneri@@@TRINITY_DN710_c0_g1_i2.p1,cbrenneri@@@TRINITY_DN710_c0_g1_i3.p1	cbriggsae@@@TRINITY_DN22860_c0_g1_i1.p1	celegans@@@TRINITY_DN10738_c0_g1_i1.p1	celegans@@@TRINITY_GG_23194_c0_g1_i1.p1	cinopinata@@@TRINITY_DN175_c0_g1_i1.p1,cinopinata@@@TRINITY_DN175_c0_g1_i10.p1,cinopinata@@@TRINITY_DN175_c0_g1_i2.p1,cinopinata@@@TRINITY_DN175_c0_g1_i3.p1,cinopinata@@@TRINITY_DN175_c0_g1_i5.p1,cinopinata@@@TRINITY_DN175_c0_g1_i7.p1,cinopinata@@@TRINITY_DN175_c0_g1_i8.p1,cinopinata@@@TRINITY_DN175_c0_g1_i9.p1	cjaponica@@@TRINITY_DN7543_c0_g1_i1.p1	cremanei@@@TRINITY_DN691_c0_g1_i1.p1	ppacificus@@@TRINITY_DN3245_c0_g3_i1.p1,ppacificus@@@TRINITY_DN3245_c0_g3_i2.p1
348	14	23	0.381	CEW1@@@TRINITY_DN4246_c0_g1_i1.p1	DF5006@@@TRINITY_DN2769_c0_g1_i1.p1	DF5012@@@TRINITY_DN1783_c0_g1_i1.p1,DF5012@@@TRINITY_DN1783_c0_g1_i2.p1	DF5112@@@TRINITY_DN51_c1_g3_i3.p1	MT8872@@@TRINITY_DN17781_c0_g1_i1.p1	C07A9.3a,C07A9.3b,C07A9.3c,C07A9.3d	cbrenneri@@@TRINITY_DN7_c1_g1_i1.p1	cbriggsae@@@TRINITY_DN3854_c0_g2_i1.p1	celegans@@@TRINITY_DN1107_c0_g1_i1.p1,celegans@@@TRINITY_DN1107_c0_g1_i2.p1	celegans@@@TRINITY_GG_9048_c0_g1_i1.p1	cinopinata@@@TRINITY_DN5909_c0_g1_i2.p1,cinopinata@@@TRINITY_DN5909_c0_g1_i1.p1	cjaponica@@@TRINITY_DN2495_c0_g1_i2.p1,cjaponica@@@TRINITY_DN2495_c0_g1_i3.p1,cjaponica@@@TRINITY_DN2495_c0_g1_i4.p1	cremanei@@@TRINITY_DN1362_c0_g1_i1.p1	ppacificus@@@TRINITY_DN3177_c0_g1_i1.p1,ppacificus@@@TRINITY_DN3177_c0_g1_i2.p1
[truncated: 22,847 more rows]
