# Supplementary material for: Nematode gene annotation by machine-learning-assisted proteotranscriptomics enables proteome-wide evolutionary analysis
Source: HighWire-hosted journal article supplement (doi:10.1101/gr.277070.122), 2023-01-01
Supplement: Supplemental_Table_S10.xlsx [file Supplemental_Table_S10.xlsx]

## Sheet: Legend
Supplemental_Table_S10
Enrichment analysis provided by STRINGdb for each individual species
Sheet 1 shows Trinity name related with each of the clusters of the enrichment analysis for C.elegans
Sheet 2 shows the clusters of the enrichment analysis for C.elegans
Sheet 3 shows the enriched terms for C.elegans
Sheet 4 shows Trinity name related with each of the clusters of the enrichment analysis for C.brenneri
Sheet 5 shows the clusters of the enrichment analysis for C.brenneri
Sheet 6 shows the enriched terms for C.brenneri
Sheet 7 shows Trinity name related with each of the clusters of the enrichment analysis for C.briggsae
Sheet 8 shows the clusters of the enrichment analysis for C.briggsae
Sheet 9 shows the enriched terms for C.briggsae
Sheet 10 shows Trinity name related with each of the clusters of the enrichment analysis for C.drosophilae
Sheet 11 shows the clusters of the enrichment analysis for C.drosophilae
Sheet 12 shows the enriched terms for C.drosophilae
Sheet 13 shows Trinity name related with each of the clusters of the enrichment analysis for C.inopinata
Sheet 14 shows the clusters of the enrichment analysis for C.inopinata
Sheet 15 shows the enriched terms for C.inopinata
Sheet 16 shows Trinity name related with each of the clusters of the enrichment analysis for C.japonica
Sheet 17 shows the clusters of the enrichment analysis for C.japonica
Sheet 18 shows the enriched terms for C.japonica
Sheet 19 shows Trinity name related with each of the clusters of the enrichment analysis for C.remanei
Sheet 20 shows the clusters of the enrichment analysis for C.remanei
Sheet 21 shows the enriched terms for C.remanei
Sheet 22 shows Trinity name related with each of the clusters of the enrichment analysis for O.tipulae
Sheet 23 shows the clusters of the enrichment analysis for O.tipulae
Sheet 24 shows the enriched terms for O.tipulae
Sheet 25 shows Trinity name related with each of the clusters of the enrichment analysis for P.pacificus
Sheet 26 shows the clusters of the enrichment analysis for P.pacificus
Sheet 27 shows the enriched terms for P.pacificus
Sheet 28 shows Trinity name related with each of the clusters of the enrichment analysis for R.axei
Sheet 29 shows the clusters of the enrichment analysis for R.axei
Sheet 30 shows the enriched terms for R.axei
Sheet 31 shows Trinity name related with each of the clusters of the enrichment analysis for R.regina
Sheet 32 shows the clusters of the enrichment analysis for R.regina
Sheet 33 shows the enriched terms for R.regina

## Sheet: Celegans
Trinity_name	protein.id	domain_summary_url	annotation	other_names_and_aliases	X.clustering.method	cluster.number	cluster.color	gene.count	protein.description
celegans@@@TRINITY_DN2687_c0_g2_i2.p1	F33D4.6	Uncharacterized protein; Protein F33D4.6, isoform a (F33D4.6) mRNA, complete cds	https://smart.embl.de/smart/DDvec.cgi?smart=648:SIGNAL(1|17)+	177552,CCD63771.1,CCD63772.1,CE33634,CE37228,CELE_F33D4.6,Cel.6350,F33D4.6,F33D4.6a,F33D4.6b,FO080445,H2KYK9,NM_068859,NM_068859.4,NM_068860,NM_068860.2,NP_501260,NP_501260.2,NP_501261,NP_501261.2,O44189,O44189_CAEEL,UPI0000183E28,UPI000042618E,Uncharacterized protein,WBGene00017998,cel:CELE_F33D4.6	MCL	1	Red	4	Uncharacterized protein; Protein F33D4.6, isoform a (F33D4.6) mRNA, complete cds
celegans@@@TRINITY_DN20193_c0_g1_i1.p1	T06D8.10	Uncharacterized protein; Protein T06D8.10 (T06D8.10) mRNA, complete cds	https://smart.embl.de/smart/DDvec.cgi?smart=1490:SIGNAL(1|18)+Pfam_An_peroxidase(160|676)+Pfam_An_peroxidase(847|1393)+	1.11.1.7,174717,CAA88973.1,CE13311,CELE_T06D8.10,Cel.14438,EC 1.11.1.7,G5ECK5,G5ECK5_CAEEL,NM_064006,NM_064006.4,NP_496407,NP_496407.1,Peroxidase ,Protein T06D8.10 (T06D8.10) mRNA, complete cds,T06D8.10,UPI0000081072,Uncharacterized protein,WBGene00011530,cel:CELE_T06D8.10	MCL	1	Red	4	Uncharacterized protein; Protein T06D8.10 (T06D8.10) mRNA, complete cds
celegans@@@TRINITY_DN22388_c0_g1_i1.p1	ZK180.6	Uncharacterized protein; Protein ZK180.6 (ZK180.6) mRNA, complete cds	https://smart.embl.de/smart/DDvec.cgi?smart=701:SIGNAL(1|19)+	177219,CCD73079.1,CE40731,CE48820,CELE_ZK180.6,Cel.5349,FO081645,NM_068183,NM_068183.4,NP_500584,NP_500584.2,Protein ZK180.6 (ZK180.6) mRNA, complete cds,Q23447,Q23447_CAEEL,UPI0000F1D21F,UPI0003B0B2F9,Uncharacterized protein,WBGene00022680,ZK180.6,ZK180.6a,ZK180.6b,cel:CELE_ZK180.6	MCL	1	Red	4	Uncharacterized protein; Protein ZK180.6 (ZK180.6) mRNA, complete cds
celegans@@@TRINITY_DN12125_c0_g1_i1.p1	hog-1	HOG only (Hedgehog Hog domain alone); Protein HOG-1, isoform a (hog-1) mRNA, complete cds	https://smart.embl.de/smart/DDvec.cgi?smart=245:SIGNAL(1|17)+HintN(42|153)+HintC(154|198)+	180851,C46.A08,CCD69463.1,CCD69464.1,CE35048,CE45588,CELE_W06B11.4,H2KZR5,H2KZR5_CAEEL,HOG only (Hedgehog Hog domain alone),Hog-1,NM_001270099,NM_001270099.1,NM_001270100,NM_001270100.1,NP_001257028,NP_001257028.1,NP_001257029,NP_001257029.1,Q23193,UPI00001B4E92,UPI0001F40D6C,W06B11.4,W06B11.4a,W06B11.4b,WBGene00001984,cel:CELE_W06B11.4,hog-1	MCL	1	Red	4	HOG only (Hedgehog Hog domain alone); Protein HOG-1, isoform a (hog-1) mRNA, complete cds
celegans@@@TRINITY_DN7270_c0_g1_i1.p1	C49F5.7	Uncharacterized protein; Protein C49F5.7 (C49F5.7) mRNA, complete cds	http://smart.embl.de/smart/DDt.cgi?smart=88:	183615,C49F5.7,CAB03980.2,CE31455,CELE_C49F5.7,Cel.20115,NM_077607,NM_077607.6,NP_510008,NP_510008.2,O17685,O17685_CAEEL,Protein C49F5.7 (C49F5.7) mRNA, complete cds,UPI000007C13E,Uncharacterized protein,WBGene00008211,cel:CELE_C49F5.7	MCL	2	Brown	3	Uncharacterized protein; Protein C49F5.7 (C49F5.7) mRNA, complete cds
celegans@@@TRINITY_DN55_c0_g1_i1.p1	W09D12.1	Zinc MetalloProtease; Protein W09D12.1 (W09D12.1) mRNA, complete cds; Belongs to the peptidase M10A family	https://smart.embl.de/smart/DDvec.cgi?smart=472:ZnMc(114|269)+HX(290|333)+HX(381|425)+	179991,CAB01669.2,CE33197,CELE_W09D12.1,Cel.1971,M10.A08,NM_074277,NM_074277.6,NP_506678,NP_506678.2,Protein W09D12.1 (W09D12.1) mRNA, complete cds,Q23227,Q23227_CAEEL,UPI000000CACF,W09D12.1,W09D12.1.1,W09D12.1a,WBGene00012364,Zinc MetalloProtease,Zmp-4,ZnMc domain-containing protein,cel:CELE_W09D12.1,zmp-4	MCL	2	Brown	3	Zinc MetalloProtease; Protein W09D12.1 (W09D12.1) mRNA, complete cds; Belongs to the peptidase M10A family
celegans@@@TRINITY_DN158_c0_g8_i2.p1	col-42	Col_cuticle_n domain-containing protein; COLlagen; Protein Y69H2.14 (Y69H2.14) mRNA, complete cds	https://smart.embl.de/smart/DDvec.cgi?smart=338:Col_cuticle_N(19|71)+Pfam_Collagen(198|257)+	180218,CAD56615.1,CE32542,CELE_Y69H2.14,COLlagen,Col-42,Col_cuticle_N domain-containing protein,NM_182407,NM_182407.5,NP_872207,NP_872207.1,Protein Y69H2.14 (Y69H2.14) mRNA, complete cds,Q8I4C0,Q8I4C0_CAEEL,UPI00000860B0,WBGene00013489,Y69H2.14,Y69H2.14.1,cel:CELE_Y69H2.14,col-42	MCL	2	Brown	3	Col_cuticle_n domain-containing protein; COLlagen; Protein Y69H2.14 (Y69H2.14) mRNA, complete cds
celegans@@@TRINITY_DN3891_c0_g1_i1.p1	alh-6	L-glutamate gamma-semialdehyde dehydrogenase; Belongs to the aldehyde dehydrogenase family	https://smart.embl.de/smart/DDvec.cgi?smart=563:Pfam_Aldedh(73|547)+	1-pyrroline-5-carboxylate dehydrogenase ,1.2.1.88,173510,ALdehyde deHydrogenase,Aldehyde dehydrogenase,Alh-6,CCD64341.1,CCD64342.1,CCD64343.1,CCD64344.1,CE29047,CE33403,CE37118,CE40074,CELE_F56D12.1,Cel.7988,Delta-1-pyrroline-5-carboxylate dehydrogenase,EC 1.2.1.88,F56D12.1,F56D12.1a,F56D12.1a.1,F56D12.1a.2,F56D12.1a.3,F56D12.1b.1,F56D12.1b.2,F56D12.1b.3,F56D12.1c.1,F56D12.1c.2,F56D12.1c.3,F56D12…	MCL	3	Olive	3	L-glutamate gamma-semialdehyde dehydrogenase; Belongs to the aldehyde dehydrogenase family
celegans@@@TRINITY_DN15800_c0_g1_i1.p1	lap-2	Putative aminopeptidase W07G4.4; Protein LAP-2 (lap-2) mRNA, complete cds	https://smart.embl.de/smart/DDvec.cgi?smart=522:Pfam_Peptidase_M17(185|508)+	179790,3.4.11.-,3.4.11.1,CAB01448.1,CE03794,Cel.5665,EC 3.4.11.1,Lap-2,Leucyl aminopeptidase ,M17.011,NM_073859,NM_073859.4,NP_506260,NP_506260.1,Protein LAP-2 (lap-2) mRNA, complete cds,Putative aminopeptidase W07G4.4,Q27245,UPI0000061211,W07G4.4,WBGene00002250,YH24_CAEEL,cel:CELE_W07G4.4,lap-2	MCL	3	Olive	3	Putative aminopeptidase W07G4.4; Protein LAP-2 (lap-2) mRNA, complete cds
celegans@@@TRINITY_DN7095_c0_g1_i1.p1	tpi-1	Triosephosphate isomerase; Protein TPI-1 (tpi-1) mRNA, complete cds; Belongs to the triosephosphate isomerase family	https://smart.embl.de/smart/DDvec.cgi?smart=247:Pfam_TIM(5|243)+	174844,1MO0,4.2.3.3,5.3.1.1,AAA79846.1,CAA19447.1,CE19040,Cel.39610,Cel.6518,EC 5.3.1.1,Methylglyoxal synthase,NM_064162,NM_064162.4,NP_001366651,NP_496563,NP_496563.1,Protein TPI-1 (tpi-1) mRNA, complete cds,Q10657,Q9U2R2,TIM,TPIS_CAEEL,Tpi-1,Triose-phosphate isomerase,Triosephosphate isomerase,Triosephosphate isomerase (TIM) ,U23081,UPI00001371E0,WBGene00006601,Y17G7B.7,Y17G7B.7.1,cel:CELE_Y17G…	MCL	3	Olive	3	Triosephosphate isomerase; Protein TPI-1 (tpi-1) mRNA, complete cds; Belongs to the triosephosphate isomerase family
celegans@@@TRINITY_DN5170_c0_g1_i1.p1	tag-18	Uncharacterized protein; Protein TAG-18 (tag-18) mRNA, complete cds	http://smart.embl.de/smart/DDt.cgi?smart=201:	180662,CCD62369.1,CE04964,CELE_T14G12.3,Cel.5587,FO080253,NM_076241,NM_076241.7,NP_508642,NP_508642.1,Protein TAG-18 (tag-18) mRNA, complete cds,Q22508,Q22508_CAEEL,T14G12.3,Tag-18,UPI000007BDFD,Uncharacterized protein,WBGene00006408,cel:CELE_T14G12.3,tag-18	MCL	4	Green	3	Uncharacterized protein; Protein TAG-18 (tag-18) mRNA, complete cds
celegans@@@TRINITY_DN44_c0_g1_i1.p1	tni-3	Troponin I 3; Troponin I is the inhibitory subunit of troponin, the thin filament regulatory complex which confers calcium-sensitivity to muscle actomyosin ATPase activity	https://smart.embl.de/smart/DDvec.cgi?smart=260:COIL(18|48)+Pfam_Troponin(58|188)+	180127,AB107359,BAD89380.1,CAB04737.1,CE20087,CeTNI-3,Cel.6415,NM_074849,NM_074849.7,NP_507250,NP_507250.1,Protein TNI-3 (tni-3) mRNA, complete cds,Q5FBV4,Q9XUN9,T20B3.2,T20B3.2.1,T20B3.2.2,TNNI3_CAEEL,TnI 3,Tni-3,Troponin I 3,UPI0000080CC7,WBGene00006585,cel:CELE_T20B3.2,tni-3	MCL	4	Green	3	Troponin I 3; Troponin I is the inhibitory subunit of troponin, the thin filament regulatory complex which confers calcium-sensitivity to muscle actomyosin ATPase activity
celegans@@@TRINITY_DN557_c0_g5_i1.p1	unc-27	Troponin I 2; Troponin I is the inhibitory subunit of troponin, the thin filament regulatory complex which confers calcium-sensitivity to muscle actomyosin ATPase activity	https://smart.embl.de/smart/DDvec.cgi?smart=242:COIL(2|39)+Pfam_Troponin(46|178)+	181124,AB107357,BAD89378.1,CCD73101.1,CE40008,CeTNI-2,NM_077087,NM_077087.6,NP_509488,NP_509488.2,Protein UNC-27 (unc-27) mRNA, complete cds,Q5FBV6,Q9GYF1,TNNI2_CAEEL,TnI 2,Troponin I 2,UPI00004C9D19,Unc-27,Uncoordinated protein 27,WBGene00006764,ZK721.2,cel:CELE_ZK721.2,tni-2,unc-27	MCL	4	Green	3	Troponin I 2; Troponin I is the inhibitory subunit of troponin, the thin filament regulatory complex which confers calcium-sensitivity to muscle actomyosin ATPase activity
celegans@@@TRINITY_DN15816_c0_g1_i1.p1	pbs-6	20S proteasome subunit beta 6; Proteasome subunit beta type-1; The proteasome is a multicatalytic proteinase complex which is characterized by its ability to cleave peptides with Arg, Phe, Tyr, Leu, and Glu adjacent to the leaving group at neutral or slightly basic pH. The proteasome has an ATP-dependent proteolytic activity (By similarity)	https://smart.embl.de/smart/DDvec.cgi?smart=258:Pfam_Proteasome(49|242)+	176161,20S proteasome subunit beta 6 ,3.4.25.1,AAG50223.1,AF303265,C02F5.9,C02F5.9.1,CCD62635.1,CE26745,Cel.23369,EC 3.4.25.1,NM_066405,NM_066405.4,NP_498806,NP_498806.1,P34286,PSB1_CAEEL,Pbs-6,Proteasome subunit beta 6,Proteasome subunit beta type-1,Protein PBS-6 (pbs-6) mRNA, complete cds,Q9BMU3,UPI000013259A,WBGene00003952,cel:CELE_C02F5.9,pbs-6	MCL	5	Lime Green	2	20S proteasome subunit beta 6; Proteasome subunit beta type-1; The proteasome is a multicatalytic proteinase complex which is characterized by its ability to cleave peptides with Arg, Phe, Tyr, Leu, and Glu adjacent to the leaving group at neutral or slightly basic pH. The proteasome has an ATP-dependent proteolytic activity (By similarity)
celegans@@@TRINITY_DN3674_c0_g1_i2.p1	pmk-3	Mitogen-activated protein kinase pmk-3; Responds to activation by environmental stress and pro- inflammatory cytokines by phosphorylating downstream targets. Involved in axon regeneration after injury, probably downstream of dlk-1 and mkk-4 and upstream of mak-2. May phosphorylate mak-2. Plays a role in cilium length regulation, possibly by reducing rab-5 mediated endocytosis. Plays a role in the…	https://smart.embl.de/smart/DDvec.cgi?smart=474:S_TKc(118|419)+	177610,2.7.11.24,CCD61404.1,CE29318,Cel.12533,EC 2.7.11.24,F42G8.4,F42G8.4.1,F42G8.4.2,F42G8.4a,FO080126,Mitogen-activated protein kinase pmk-3,NM_068962,NM_068962.4,NP_001370308,NP_501363,NP_501363.1,O44514,P38 MAP kinase ,P38 MAP kinase 3,PMK3_CAEEL,Pmk-3,Protein PMK-3 (pmk-3) mRNA, complete cds,Stress-activated protein kinase pmk-3,UPI0000083A05,WBGene00004057,cel:CELE_F42G8.4,p38 MAP kinase 3…	MCL	5	Lime Green	2	Mitogen-activated protein kinase pmk-3; Responds to activation by environmental stress and pro- inflammatory cytokines by phosphorylating downstream targets. Involved in axon regeneration after injury, probably downstream of dlk-1 and mkk-4 and upstream of mak-2. May phosphorylate mak-2. Plays a role in cilium length regulation, possibly by reducing rab-5 mediated endocytosis. Plays a role in the…
celegans@@@TRINITY_DN17949_c0_g1_i1.p1	pat-4	Integrin-linked protein kinase homolog pat-4; Probable pseudokinase that acts as an adapter protein. Involved in the assembly of dense bodies and M lines during body wall muscle development by recruiting several of their components including integrin pat-3, cpna-1, unc-89 and unc-112 to integrin- mediated attachment sites. Plays a role in distal tip cell (DTC) migration and in oocyte development …	https://smart.embl.de/smart/DDvec.cgi?smart=466:ANK(50|79)+ANK(83|112)+ANK(116|145)+Pfam_Pkinase(211|460)+	175175,2.7.11.1,AJ249344,C29F9.7,CAB77052.1,CCD66066.1,CE19706,Cel.10243,EC 2.7.11.1,ILK homolog,ILKH_CAEEL,Integrin-linked kinase ,Integrin-linked protein kinase homolog pat-4,NM_064738,NM_064738.5,NP_497139,NP_497139.1,Pat-4,Protein PAT-4 (pat-4) mRNA, complete cds,Q9NG00,Q9TZC4,UPI000007FB02,WBGene00003931,cel:CELE_C29F9.7,pat-4	MCL	6	Cyan	2	Integrin-linked protein kinase homolog pat-4; Probable pseudokinase that acts as an adapter protein. Involved in the assembly of dense bodies and M lines during body wall muscle development by recruiting several of their components including integrin pat-3, cpna-1, unc-89 and unc-112 to integrin- mediated attachment sites. Plays a role in distal tip cell (DTC) migration and in oocyte development …
celegans@@@TRINITY_DN5187_c0_g1_i1.p1	pat-6	Paralyzed arrest at two-fold protein 6; Involved in the regulation of cell adhesion and cytoskeleton organization. During embryonic development, required to recruit cpna-1, unc-89 and myofilaments to newly forming integrin attachments composed of integrins pat-2/pat-3, pat-4 and unc-112. Also required to reposition the integrin-based attachments so that they form the highly ordered array of dense…	https://smart.embl.de/smart/DDvec.cgi?smart=375:CH(101|201)+CH(268|371)+	176848,Actopaxin homolog,CCD72524.1,CE18268,Cel.12540,NM_067490,NM_067490.5,NP_499891,NP_499891.1,O16785,PARV_CAEEL,Paralyzed arrest at two-fold protein 6,Parvin,Parvin-like protein,Pat-6,Protein PAT-6 (pat-6) mRNA, complete cds,T21D12.4,UPI000013134D,WBGene00003932,cel:CELE_T21D12.4,pat-6	MCL	6	Cyan	2	Paralyzed arrest at two-fold protein 6; Involved in the regulation of cell adhesion and cytoskeleton organization. During embryonic development, required to recruit cpna-1, unc-89 and myofilaments to newly forming integrin attachments composed of integrins pat-2/pat-3, pat-4 and unc-112. Also required to reposition the integrin-based attachments so that they form the highly ordered array of dense…
celegans@@@TRINITY_DN16284_c0_g1_i1.p1	Y45F10C.4	UPF0375 protein Y45F10C.4; Protein Y45F10C.4 (Y45F10C.4) mRNA, complete cds	https://smart.embl.de/smart/DDvec.cgi?smart=124:Pfam_DUF1505(1|114)+	178335,CAB16479.1,CE16638,Cel.11971,NM_070239,NM_070239.5,NP_502640,NP_502640.1,O45944,Protein Y45F10C.4 (Y45F10C.4) mRNA, complete cds,U375F_CAEEL,UPF0375 protein Y45F10C.4,UPI00000811ED,WBGene00012880,Y45F10C.4,cel:CELE_Y45F10C.4	MCL	7	Blue	2	UPF0375 protein Y45F10C.4; Protein Y45F10C.4 (Y45F10C.4) mRNA, complete cds
celegans@@@TRINITY_DN20173_c0_g1_i1.p1	perm-2	PERMeable eggshell; Protein PERM-2 (perm-2) mRNA, complete cds	https://smart.embl.de/smart/DDvec.cgi?smart=203:SIGNAL(1|20)+	176933,C44B12.1,C44B12.1.1,CCD67227.1,CE27850,CELE_C44B12.1,NM_067641,NM_067641.6,NP_500042,NP_500042.1,O44145,O44145_CAEEL,PERMeable eggshell,Perm-2,Protein PERM-2 (perm-2) mRNA, complete cds,UPI00000757CF,WBGene00016636,cel:CELE_C44B12.1,perm-2	MCL	7	Blue	2	PERMeable eggshell; Protein PERM-2 (perm-2) mRNA, complete cds
celegans@@@TRINITY_DN3330_c0_g1_i1.p1	K02B12.7	Adp-ribosylation factor gtpase-activating protein 1; Protein K02B12.7 (K02B12.7) mRNA, complete cds	https://smart.embl.de/smart/DDvec.cgi?smart=423:ArfGap(7|124)+	172643,Arf-GAP domain-containing protein,CAB00036.1,CE11618,CELE_K02B12.7,Cel.17579,K02B12.7,NM_059909,NM_059909.3,NP_492310,NP_492310.1,P90904,P90904_CAEEL,Protein K02B12.7 (K02B12.7) mRNA, complete cds,UPI000007AFE7,Uncharacterized protein,WBGene00010500,cel:CELE_K02B12.7	MCL	8	Purple	2	Adp-ribosylation factor gtpase-activating protein 1; Protein K02B12.7 (K02B12.7) mRNA, complete cds
celegans@@@TRINITY_DN5387_c0_g1_i1.p1	clic-1	Clathrin light chain; Clathrin is the major protein of the polyhedral coat of coated pits and vesicles	https://smart.embl.de/smart/DDvec.cgi?smart=226:Pfam_Clathrin_lg_ch(1|226)+	179150,CCD65786.1,CE13219,CELE_T05B11.3,Cel.17413,Clathrin light chain,Clic-1,NM_072598,NM_072598.5,NP_504999,NP_504999.1,P90961,P90961_CAEEL,Protein CLIC-1 (clic-1) mRNA, complete cds,T05B11.3,UPI00000786CA,WBGene00020246,cel:CELE_T05B11.3,clic-1	MCL	8	Purple	2	Clathrin light chain; Clathrin is the major protein of the polyhedral coat of coated pits and vesicles
celegans@@@TRINITY_DN7965_c0_g1_i1.p1	B0285.4	[phosphatase 2a protein]-leucine-carboxy methyltransferase; Probable leucine carboxyl methyltransferase 1; Methylates the carboxyl group of the C-terminal leucine residue of protein phosphatase 2A catalytic subunits to form alpha-leucine ester residues	https://smart.embl.de/smart/DDvec.cgi?smart=333:Pfam_LCM(30|227)+	175561,2.1.1.233,B0285.4,CAA84295.1,CE00643,CELE_B0285.4,Cel.10959,EC 2.1.1.233,LCMT1_CAEEL,Lcmt-1,Leucine carboxyl methyltransferase 1,NM_065474,NM_065474.3,NP_497875,NP_497875.1,P46554,Probable leucine carboxyl methyltransferase 1,Protein B0285.4 (B0285.4) mRNA, complete cds,UPI000013B6DE,WBGene00007137,cel:CELE_B0285.4,lcmt-1
celegans@@@TRINITY_DN4335_c0_g1_i1.p1	C25H3.7	Uncharacterized protein; Protein C25H3.7 (C25H3.7) mRNA, complete cds	https://smart.embl.de/smart/DDvec.cgi?smart=275:Pfam_GST_N_3(53|122)+Pfam_GST_C(188|267)+	173961,C25H3.7,C25H3.7a,C25H3.7b,CCD65046.1,CE02505,CELE_C25H3.7,NM_001267173,NM_001267173.1,NP_001254102,NP_001254102.1,Protein C25H3.7 (C25H3.7) mRNA, complete cds,Q8MQC1,Q8MQC1_CAEEL,UPI00000774DF,Uncharacterized protein,WBGene00016116,cel:CELE_C25H3.7
celegans@@@TRINITY_DN20196_c0_g1_i1.p1	C26F1.3	Uncharacterized protein c26f1.3; Protein C26F1.3 (C26F1.3) mRNA, complete cds	http://smart.embl.de/smart/DDt.cgi?smart=186:	179155,AAG50206.1,AF303248,C26F1.3,C26F1.3.1,C26F1.3.2,CCD65768.1,CE06877,Cel.19429,NM_072607,NM_072607.5,NP_505008,NP_505008.1,Protein C26F1.3 (C26F1.3) mRNA, complete cds,Q18232,UPI000013A3CF,Uncharacterized protein,Uncharacterized protein C26F1.3,WBGene00016148,YBRI_CAEEL,cel:CELE_C26F1.3
celegans@@@TRINITY_DN730_c0_g1_i1.p1	C32E8.9	Ethylmalonyl-coa/methylmalonyl-coa decarboxylase; Protein C32E8.9 (C32E8.9) mRNA, complete cds; Belongs to the enoyl-CoA hydratase/isomerase family	https://smart.embl.de/smart/DDvec.cgi?smart=268:Pfam_ECH_2(36|268)+	171951,4.1.1.-,4.1.1.94,C32E8.9,CCD66408.1,CE29693,CELE_C32E8.9,Cel.6921,EC 4.1.1.-,EC 4.1.1.94,NM_058821,NM_058821.5,NP_491222,NP_491222.2,P91130,P91130_CAEEL,Protein C32E8.9 (C32E8.9) mRNA, complete cds,UPI00000611D0,Uncharacterized protein,WBGene00016325,cel:CELE_C32E8.9
celegans@@@TRINITY_DN10198_c0_g1_i2.p1	C44B9.1	Related to yeast Vacuolar Protein Sorting factor; Protein VESA-1 (vesa-1) mRNA, complete cds	https://smart.embl.de/smart/DDvec.cgi?smart=954:Pfam_Vps54_N(76|363)+Pfam_DUF2451(699|953)+	183433,C44B9.1,CAA97778.2,CE37754,CELE_C44B9.1,Cel.26070,NM_066993,NM_066993.2,NP_499394,NP_499394.2,Protein VESA-1 (vesa-1) mRNA, complete cds,Q18602,Q18602_CAEEL,Related to yeast Vacuolar Protein Sorting factor,Syndetin,UPI000046E4AA,Vps-50,WBGene00008078,cel:CELE_C44B9.1,vesa-1,vps-50
celegans@@@TRINITY_DN3585_c0_g2_i1.p1	C53A5.17	tRNA (guanine(37)-N1)-methyltransferase; Specifically methylates the N1 position of guanosine-37 in various cytoplasmic and mitochondrial tRNAs. Methylation is not dependent on the nature of the nucleoside 5' of the target nucleoside. This is the first step in the biosynthesis of wybutosine (yW), a modified base adjacent to the anticodon of tRNAs and required for accurate decoding; Belongs to the…	https://smart.embl.de/smart/DDvec.cgi?smart=474:Pfam_TRM(243|319)+	13216595,2.1.1.228,A8WHT1,C53A5.17,C53A5.2c,CAP16267.1,CE41622,Cel.4965,EC 2.1.1.228,M1G-methyltransferase,NM_001269663,NM_001269663.1,NP_001256592,NP_001256592.1,Protein C53A5.17 (C53A5.17) mRNA, complete cds,TRM5_CAEEL,TRNA (guanine(37)-N1)-methyltransferase,TRNA (guanine37-N1)-methyltransferase ,UPI00015E1BE6,WBGene00194707,cel:CELE_C53A5.17,tRNA (guanine(37)-N1)-methyltransferase,tRNA [GM37] …
celegans@@@TRINITY_DN3940_c0_g1_i1.p1	F09F7.7	DNA N6-methyl adenine demethylase; Dioxygenase that specifically demethylates DNA methylated on the 6th position of adenine (N(6)-methyladenosine) DNA. N(6)-methyladenosine (m6A) DNA is involved in epigenetic transgenerational inheritance	https://smart.embl.de/smart/DDvec.cgi?smart=291:Pfam_2OG-FeII_Oxy_2(85|256)+	1.14.11.51,175765,CCD68390.1,CCD68391.1,CE30655,CE30656,Cel.34262,DNA N6-methyl adenine demethylase,DNA N6-methyl adenine demethylase ,EC 1.14.11.51,F09F7.7,F09F7.7a,F09F7.7b,N6-methyl adenine demethylase 1,NMAD1_CAEEL,NM_171124,NM_171124.4,NM_171125,NM_171125.3,NP_741141,NP_741141.1,NP_741142,NP_741142.1,Nmad-1,Q8MNT8,Q8MNT9,UPI0000075577,UPI000007850C,WBGene00017304,cel:CELE_F09F7.7,nmad-1
celegans@@@TRINITY_DN3250_c0_g1_i1.p1	F13B6.3	Uncharacterized protein; Protein F13B6.3 (F13B6.3) mRNA, complete cds	https://smart.embl.de/smart/DDvec.cgi?smart=435:SIGNAL(1|16)+	177516,CCD62064.2,CE47165,CELE_F13B6.3,Cel.12854,F13B6.3,F13B6.3.1,FO080214,NM_068792,NM_068792.4,NP_501193,NP_501193.3,O44483,O44483_CAEEL,Protein F13B6.3 (F13B6.3) mRNA, complete cds,UPI0002530C1E,Uncharacterized protein,WBGene00017418,cel:CELE_F13B6.3
celegans@@@TRINITY_DN2936_c0_g1_i1.p1	F28A12.4	ASpartyl Protease; Protein ASP-13 (asp-13) mRNA, complete cds; Belongs to the peptidase A1 family	https://smart.embl.de/smart/DDvec.cgi?smart=389:SIGNAL(1|16)+Pfam_Asp(71|387)+	179247,A01.A83,ASpartyl Protease,Asp-13,Aspartic protease 13,CCD70115.1,CE09738,CELE_F28A12.4,Cel.3850,F28A12.4,F28A12.4.1,F28A12.4.2,NM_072831,NM_072831.4,NP_505232,NP_505232.1,Peptidase A1 domain-containing protein,Protein ASP-13 (asp-13) mRNA, complete cds,Q22972,Q22972_CAEEL,UPI000007D167,WBGene00017881,asp-13,cel:CELE_F28A12.4
celegans@@@TRINITY_DN20937_c0_g1_i1.p1	F42A10.7	Uncharacterized protein; Protein F42A10.7 (F42A10.7) mRNA, complete cds	https://smart.embl.de/smart/DDvec.cgi?smart=187:SIGNAL(1|17)+	175875,CCD65317.1,CE01298,CELE_F42A10.7,F42A10.7,F42A10.7.1,F42A10.7.2,NM_065940,NM_065940.4,NP_498341,NP_498341.1,Protein F42A10.7 (F42A10.7) mRNA, complete cds,Q20312,Q20312_CAEEL,UPI00000824C5,Uncharacterized protein,WBGene00018343,cel:CELE_F42A10.7
celegans@@@TRINITY_DN25223_c0_g1_i1.p1	F42F12.4	1,2-dihydroxy-3-keto-5-methylthiopentene dioxygenase; Catalyzes the formation of formate and 2-keto-4- methylthiobutyrate (KMTB) from 1,2-dihydroxy-3-keto-5- methylthiopentene (DHK-MTPene)	https://smart.embl.de/smart/DDvec.cgi?smart=178:Pfam_AraC_binding(76|171)+	1.13.11.53,1.13.11.54,181393,ARD,Acireductone dioxygenase (Fe(2+)-requiring),CAA92175.1,CE16031,CELE_F42F12.4,EC 1.13.11.53,EC 1.13.11.54,F42F12.4,F42F12.4.1,F42F12.4.2,Fe-ARD,NM_077671,NM_077671.3,NP_510072,NP_510072.1,Protein F42F12.4 (F42F12.4) mRNA, complete cds,Q20340,Q20340_CAEEL,Q20341,UPI0000082CCF,WBGene00009636,cel:CELE_F42F12.4
celegans@@@TRINITY_DN20012_c0_g1_i1.p1	F46C5.9	Wd_repeats_region domain-containing protein; Protein F46C5.9 (F46C5.9) mRNA, complete cds	https://smart.embl.de/smart/DDvec.cgi?smart=451:TRANS(7|29)+WD40(80|119)+WD40(127|166)+WD40(184|220)+WD40(222|261)+WD40(272|311)+WD40(365|407)+	174409,CAA91052.1,CE10584,CELE_F46C5.9,Cel.15069,F46C5.9,G5EFD7,G5EFD7_CAEEL,NM_063476,NM_063476.3,NP_495877,NP_495877.1,Protein F46C5.9 (F46C5.9) mRNA, complete cds,Transducin beta-like protein 2,UPI0000075E86,Uncharacterized protein,WBGene00009784,WD_REPEATS_REGION domain-containing protein,Z83016,cel:CELE_F46C5.9
celegans@@@TRINITY_DN6125_c0_g2_i1.p1	F52B5.2	Protein kinase domain-containing protein; Protein F52B5.2 (F52B5.2) mRNA, complete cds	https://smart.embl.de/smart/DDvec.cgi?smart=301:Pfam_Pkinase(31|292)+	172614,CAA99854.2,CE24993,CELE_F52B5.2,F52B5.2,NM_059858,NM_059858.4,NP_492259,NP_492259.1,Protein F52B5.2 (F52B5.2) mRNA, complete cds,Protein kinase domain-containing protein,Q20643,Q20643_CAEEL,UPI000007E2EC,Uncharacterized protein,WBGene00009921,cel:CELE_F52B5.2
celegans@@@TRINITY_DN187_c0_g1_i1.p2	F54D5.3	Uncharacterized protein; Protein F54D5.3 (F54D5.3) mRNA, complete cds	https://smart.embl.de/smart/DDvec.cgi?smart=186:SIGNAL(1|18)+Pfam_DUF5352(22|186)+	174773,CAA91330.2,CE28033,CELE_F54D5.3,F54D5.3,F54D5.3.1,NM_064072,NM_064072.3,NP_496473,NP_496473.1,Protein F54D5.3 (F54D5.3) mRNA, complete cds,Q20769,Q20769_CAEEL,UPI0000078F06,Uncharacterized protein,WBGene00010049,cel:CELE_F54D5.3
celegans@@@TRINITY_DN3966_c0_g1_i2.p1	F56F11.2	Uncharacterized protein; Protein F56F11.2 (F56F11.2) mRNA, complete cds	http://smart.embl.de/smart/DDt.cgi?smart=401:	186407,CCD72010.1,CE11278,CELE_F56F11.2,Cel.10395,F56F11.2,NM_065232,NM_065232.1,NP_497633,NP_497633.1,Protein F56F11.2 (F56F11.2) mRNA, complete cds,Q9TZ63,Q9TZ63_CAEEL,UPI0000075779,Uncharacterized protein,WBGene00018989,cel:CELE_F56F11.2
celegans@@@TRINITY_DN24309_c0_g1_i1.p1	K04C2.8	Uncharacterized protein; Protein K04C2.8 (K04C2.8) mRNA, complete cds	http://smart.embl.de/smart/DDt.cgi?smart=185:	3564770,CCD72621.1,CE41678,CELE_K04C2.8,Cel.29916,K04C2.8,NM_001027489,NM_001027489.2,NP_001022660,NP_001022660.2,Protein K04C2.8 (K04C2.8) mRNA, complete cds,Q4TTC9,Q4TTC9_CAEEL,UPI00015E500F,Uncharacterized protein,WBGene00044312,cel:CELE_K04C2.8
celegans@@@TRINITY_DN3422_c0_g1_i3.p2	K08D12.3	Cellular nucleic acid-binding protein; Protein K08D12.3, isoform a	https://smart.embl.de/smart/DDvec.cgi?smart=151:ZnF_C2HC(5|21)+ZnF_C2HC(36|52)+ZnF_C2HC(68|84)+ZnF_C2HC(108|124)+ZnF_C2HC(132|148)+	176979,CCD72801.1,CCD72802.1,CCHC-type domain-containing protein,CE21045,CE31712,CELE_K08D12.3,Cellular nucleic acid-binding protein,K08D12.3,K08D12.3a,K08D12.3a.1,K08D12.3b.1,K08D12.3b.2,NM_171273,NM_171273.3,NM_171274,NM_171274.4,NP_741323,NP_741323.1,NP_741324,NP_741324.1,Protein K08D12.3, isoform a,Q8MXU9,Q966I7,Q966I7_CAEEL,UPI0000078BB4,UPI0000079ADE,Uncharacterized protein,WBGene00019537,c…
celegans@@@TRINITY_DN7169_c0_g1_i1.p1	K09H9.2	Dna (DNA) replication and Sister Chromatid Cohesion; Protein K09H9.2 (K09H9.2) mRNA, complete cds	https://smart.embl.de/smart/DDvec.cgi?smart=443:Pfam_Dcc1(93|409)+	171887,CCD67357.1,CE34336,CELE_K09H9.2,Cel.18471,Dscc-1,K09H9.2,K09H9.2.1,K09H9.2.2,NM_058708,NM_058708.6,NP_491109,NP_491109.2,O44992,O44992_CAEEL,Protein K09H9.2 (K09H9.2) mRNA, complete cds,Sister chromatid cohesion protein DCC1,UPI00001A9779,WBGene00019595,cel:CELE_K09H9.2,dscc-1
celegans@@@TRINITY_DN7586_c0_g1_i1.p1	R151.6	Derlin-2/3; Derlin-2; May be required for the degradation process of some specific misfolded endoplasmic reticulum (ER) luminal proteins. Participates in the transfer of misfolded proteins from the ER to the cytosol, where they are destroyed by the proteasome in a ubiquitin-dependent manner. Its precise function remains unclear, but its ability to complement der1 mutations in C.cerevisiae, sugges…	https://smart.embl.de/smart/DDvec.cgi?smart=237:Pfam_DER1(11|201)+	176018,AAD37863.1,AF143152,CCD70760.1,CE39620,Cel.34297,DER1-like protein 2,DERL2_CAEEL,Der-2,Derlin-2,Derlin-2/3,FO081317,GO:0030968,NM_066189,NM_066189.5,NP_001370712,NP_498590,NP_498590.4,Protein R151.6 (R151.6) mRNA, complete cds,Q21997,Q9UA08,R151.6,UPI0000079747,WBGene00020109,cDerlin-2,cel:CELE_R151.6,der-2
celegans@@@TRINITY_DN14364_c0_g1_i1.p1	T25G12.6	Uncharacterized protein; Protein T25G12.6 (T25G12.6) mRNA, complete cds	https://smart.embl.de/smart/DDvec.cgi?smart=877:TRANS(35|57)+VWA(283|459)+VWA(480|653)+	181760,CCD74457.1,CE44976,CELE_T25G12.6,Cel.268,NM_078390,NM_078390.3,NP_510791,NP_510791.3,Protein T25G12.6 (T25G12.6) mRNA, complete cds,Q22783,Q22783_CAEEL,T25G12.6,UPI0001D99E41,Uncharacterized protein,WBGene00020813,cel:CELE_T25G12.6
celegans@@@TRINITY_DN9635_c0_g1_i1.p1	W05H9.2	Uncharacterized protein; Protein W05H9.2 (W05H9.2) mRNA, complete cds	http://smart.embl.de/smart/DDt.cgi?smart=851:	180899,CCD64549.1,CE33720,CELE_W05H9.2,Cel.23081,NM_076648,NM_076648.4,NP_509049,NP_509049.3,Protein W05H9.2 (W05H9.2) mRNA, complete cds,Q23178,Q23178_CAEEL,UPI0000185C27,Uncharacterized protein,W05H9.2,WBGene00021049,cel:CELE_W05H9.2
celegans@@@TRINITY_DN24778_c0_g1_i1.p1	W10D9.6	Uncharacterized protein; Protein W10D9.6 (W10D9.6) mRNA, complete cds	https://smart.embl.de/smart/DDvec.cgi?smart=178:COIL(48|82)+	13183306,C0Z1Y2,C0Z1Y2_CAEEL,CCD65584.1,CE43588,CELE_W10D9.6,FO080661,NM_001267083,NM_001267083.1,NP_001254012,NP_001254012.1,Protein W10D9.6 (W10D9.6) mRNA, complete cds,UPI00001DAD22,Uncharacterized protein,W10D9.6,W10D9.6a,WBGene00185079,cel:CELE_W10D9.6
celegans@@@TRINITY_DN325_c0_g1_i1.p1	Y53G8AR.5	E3 ubiquitin-protein ligase RNF25; Protein Y53G8AR.5 (Y53G8AR.5) mRNA, complete cds	https://smart.embl.de/smart/DDvec.cgi?smart=287:RWD(6|112)+RING(119|180)+	190241,2.3.2.27,CCD73813.1,CE35106,CELE_Y53G8AR.5,Cel.9712,E3 ubiquitin-protein ligase RNF25 ,EC 2.3.2.27,NM_065287,NM_065287.2,NP_497688,NP_497688.2,Protein Y53G8AR.5 (Y53G8AR.5) mRNA, complete cds,Q9N3F9,Q9N3F9_CAEEL,UPI00001B29FE,Uncharacterized protein,WBGene00021812,Y53G8AR.5,cel:CELE_Y53G8AR.5
celegans@@@TRINITY_DN1290_c0_g1_i1.p2	Y62F5A.9	Uncharacterized protein; Protein Y62F5A.9 (Y62F5A.9) mRNA, complete cds	https://smart.embl.de/smart/DDvec.cgi?smart=197:SIGNAL(1|18)+	259465,CAD30454.1,CE22710,CELE_Y62F5A.9,Cel.20386,NM_171042,NM_171042.5,NP_741048,NP_741048.1,Protein Y62F5A.9 (Y62F5A.9) mRNA, complete cds,Q8T3A5,Q8T3A5_CAEEL,UPI0000080860,Uncharacterized protein,WBGene00013387,Y62F5A.9,cel:CELE_Y62F5A.9
celegans@@@TRINITY_DN13796_c0_g1_i1.p1	Y71D11A.3	2-amino-3-carboxymuconate-6-semialdehyde decarboxylase; Converts alpha-amino-beta-carboxymuconate-epsilon- semialdehyde (ACMS) to alpha-aminomuconate semialdehyde (AMS); Belongs to the metallo-dependent hydrolases superfamily. ACMSD family	https://smart.embl.de/smart/DDvec.cgi?smart=401:Pfam_Amidohydro_2(15|391)+	175280,4.1.1.45,AB071420,ACMSD_CAEEL,Acsd-1,Aminocarboxymuconate-semialdehyde decarboxylase ,BAB86940.1,CCD72052.1,CCD72053.1,CE25548,CE32030,Cel.9282,EC 4.1.1.45,NM_001027764,NM_001027764.1,NM_064935,NM_064935.7,NP_001022935,NP_001022935.1,NP_497336,NP_497336.3,Picolinate carboxylase,Q8T8B9,Q95Y54,UPI0000080B91,UPI0000083B9D,WBGene00022104,Y71D11A.3,Y71D11A.3a,Y71D11A.3b,acmsd,acsd-1,cel:CELE_Y7…
celegans@@@TRINITY_DN13678_c0_g2_i2.p1	Y71H2AM.24	C-cap/cofactor c-like domain-containing protein; TuBulin folding Cofactor C homolog; Protein Y71H2AM.24 (Y71H2AM.24) mRNA, complete cds	https://smart.embl.de/smart/DDvec.cgi?smart=303:COIL(7|34)+CARP(211|245)+	3896741,C-CAP/cofactor C-like domain-containing protein,CCD73883.1,CE46496,CELE_Y71H2AM.24,Cel.32531,NM_001038294,NM_001038294.3,NP_001033383,NP_001033383.3,Q3V5J2,Q3V5J2_CAEEL,Tbcc-1,TuBulin folding Cofactor C homolog,Tubulin-specific chaperone C,UPI000217CCD5,WBGene00044609,Y71H2AM.24,cel:CELE_Y71H2AM.24,tbcc-1
celegans@@@TRINITY_DN8511_c1_g1_i1.p1	Y71H2B.2	Phosphorylated adapter rna export protein; Protein Y71H2B.2 (Y71H2B.2) mRNA, complete cds	https://smart.embl.de/smart/DDvec.cgi?smart=341:Pfam_RNA_GG_bind(200|283)+COIL(300|324)+	175382,CCD72401.1,CE24629,CELE_Y71H2B.2,Cel.7631,FO081557,NM_065191,NM_065191.4,NP_001367935,NP_497592,NP_497592.1,Phosphorylated adapter RNA export protein,Protein Y71H2B.2 (Y71H2B.2) mRNA, complete cds,Q9N4E8,Q9N4E8_CAEEL,RNA_GG_bind domain-containing protein,UPI000007A49C,Uncharacterized protein,WBGene00022192,Y71H2B.2,cel:CELE_Y71H2B.2
celegans@@@TRINITY_DN7684_c0_g2_i4.p1	Y75B8A.14	Uncharacterized protein; Protein Y75B8A.14 (Y75B8A.14) mRNA, complete cds	https://smart.embl.de/smart/DDvec.cgi?smart=272:Pfam_ATP_bind_1(7|252)+	176649,CAA22102.1,CE23026,CELE_Y75B8A.14,GPN-loop GTPase,GPN-loop GTPase 3,NM_067186,NM_067186.3,NP_499587,NP_499587.1,Protein Y75B8A.14 (Y75B8A.14) mRNA, complete cds,Q9XW68,Q9XW68_CAEEL,UPI000008343C,Uncharacterized protein,WBGene00013550,Y75B8A.14,cel:CELE_Y75B8A.14
celegans@@@TRINITY_DN20247_c0_g1_i1.p1	clec-1	C-type lectin domain-containing protein; C-type LECtin; Protein CLEC-1 (clec-1) mRNA, complete cds	https://smart.embl.de/smart/DDvec.cgi?smart=173:SIGNAL(1|20)+CLECT(23|146)+	178958,C-type LECtin,C-type lectin domain-containing protein,CCD64512.1,CE09627,CELE_F25B4.9,Cel.39509,Clec-1,F25B4.9,NM_072099,NM_072099.5,NP_504500,NP_504500.1,Protein CLEC-1 (clec-1) mRNA, complete cds,Q22966,Q22966_CAEEL,UPI0000076A13,WBGene00017772,cel:CELE_F25B4.9,clec-1
celegans@@@TRINITY_DN2390_c0_g1_i1.p1	coq-4	Ubiquinone biosynthesis protein coq-4, mitochondrial; Component of the coenzyme Q biosynthetic pathway. May play a role in organizing a multi-subunit COQ enzyme complex required for coenzyme Q biosynthesis. Required for steady-state levels of other COQ polypeptides; Belongs to the COQ4 family	https://smart.embl.de/smart/DDvec.cgi?smart=231:Pfam_Coq4(7|228)+	171966,CCD67787.1,CE40117,COQ4_CAEEL,Coenzyme Q biosynthesis protein 4,Coq-4,NM_058845,NM_058845.4,NP_491246,NP_491246.4,P91428,Protein COQ-4 (coq-4) mRNA, complete cds,T03F1.2,UPI0000163FD2,Ubiquinone biosynthesis protein COQ4,WBGene00000764,cel:CELE_T03F1.2,coq-4
celegans@@@TRINITY_DN4436_c0_g1_i1.p1	cpna-3	CoPiNe domain protein, Atypical; Protein CPNA-3 (cpna-3) mRNA, complete cds	https://smart.embl.de/smart/DDvec.cgi?smart=512:C2(131|235)+VWA(274|485)+	3565393,C01F6.1,CAA92434.1,CAA92434.2,CE02950,CE49698,CELE_C01F6.1,Cel.17067,Cel.38858,CoPiNe domain protein, Atypical,Cpna-3,NM_069183,NM_069183.4,NM_069183.5,NP_501584,NP_501584.1,NP_501584.2,Protein CPNA-3 (cpna-3) mRNA, complete cds,Q17559,Q17559_CAEEL,UPI00000830A1,VWFA domain-containing protein,WBGene00007221,Z68213,cel:CELE_C01F6.1,cpna-3
celegans@@@TRINITY_DN4237_c0_g1_i1.p1	crn-3	Exosome complex exonuclease rrp6; Cell death-related nuclease 3; Protein CRN-3, isoform a (crn-3) mRNA, complete cds	https://smart.embl.de/smart/DDvec.cgi?smart=876:Pfam_PMC2NT(41|128)+35EXOc(278|446)+HRDC(489|569)+COIL(683|710)+	3.1.13.-,3565889,AAP57299.1,AY303577,C14A4.4,C14A4.4a,C14A4.4b,CAA90108.1,CAD59140.1,CE02145,CE32797,CELE_C14A4.4,Cel.7455,Cell death-related nuclease 3,Cell-death-Related Nuclease,Crn-3,EC 3.1.13.-,Exosome complex exonuclease RRP6 ,G5EBX6,G5EBX6_CAEEL,HRDC domain-containing protein,NM_063882,NM_063882.5,NM_182164,NM_182164.5,NP_001369875,NP_496283,NP_496283.1,NP_871964,NP_871964.1,Q8I129,UPI0000…
celegans@@@TRINITY_DN2243_c0_g1_i1.p1	cyld-1	CYLinDromatosis (Human disease gene) homolog; Protein CYLD-1, isoform a	https://smart.embl.de/smart/DDvec.cgi?smart=1144:CAP_GLY(460|528)+Pfam_UCH(765|1055)+	176401,3.4.19.12,C67.A02,CAF31477.2,CCE71772.1,CCE71773.1,CE36647,CE46609,CE46674,CELE_F40F12.5,CYLinDromatosis (Human disease gene) homolog,Cel.23150,Cyld-1,EC 3.4.19.12,F40F12.5,F40F12.5a,F40F12.5b,F40F12.5c,H2L265,H2L266,NM_001268116,NM_001268116.1,NM_001268117,NM_001268117.1,NM_001268118,NM_001268118.1,NP_001255045,NP_001255045.1,NP_001255046,NP_001255046.1,NP_001255047,NP_001255047.1,Protein…
celegans@@@TRINITY_DN3059_c0_g1_i1.p1	dnj-19	DNaJ domain (Prokaryotic heat shock protein); Protein DNJ-19 (dnj-19) mRNA, complete cds	https://smart.embl.de/smart/DDvec.cgi?smart=439:DnaJ(12|67)+Pfam_DnaJ_CXXCXGXG(169|235)+	3565862,CCD65538.1,CE13229,CELE_T05C3.5,Cel.5628,DNaJ domain (Prokaryotic heat shock protein),DNaJ domain (prokaryotic heat shock protein),DnaJ homolog subfamily A member 2,Dnj-19,NM_072051,NM_072051.4,NP_504452,NP_504452.1,O16303,O16303_CAEEL,Protein DNJ-19 (dnj-19) mRNA, complete cds,T05C3.5,T05C3.5.1,UPI00000799FF,WBGene00001037,cel:CELE_T05C3.5,dnj-19
celegans@@@TRINITY_DN196_c0_g2_i1.p1	efhd-1	EF HanD calcium binding protein; Protein EFHD-1, isoform a	https://smart.embl.de/smart/DDvec.cgi?smart=687:COIL(160|189)+COIL(219|250)+EFh(545|573)+EFh(581|609)+COIL(642|681)+	175073,A8XMZ5,CAB54442.2,CAD59175.2,CAP19355.1,CE32970,CE41852,CE41853,CELE_Y48B6A.6,Cel.22973,EF HanD calcium binding protein,Efhd-1,NM_001129185,NM_001129185.1,NM_064560,NM_064560.4,NM_182166,NM_182166.5,NP_001122657,NP_001122657.1,NP_496961,NP_496961.2,NP_871966,NP_871966.2,Protein EFHD-1, isoform a,Q8I0Z7,Q9U2A6,Q9U2A6_CAEEL,UPI0000083B49,UPI00015F3B19,UPI00015F3B1A,WBGene00012980,Y48B6A.6,Y4…
celegans@@@TRINITY_DN1328_c0_g1_i1.p1	epg-6	Ectopic P Granules; Protein EPG-6, isoform a	https://smart.embl.de/smart/DDvec.cgi?smart=388:WD40(208|248)+WD40(251|292)+	189705,CAA21019.3,CAD60426.1,CAI06057.1,CBX53348.1,CE33215,CE33216,CE37799,CE45443,CELE_Y39A1A.1,Cel.9864,E3CTH5,EPG6_CAEEL,Ectopic P Granules,Ectopic P granules protein 6,Epg-6,NM_001027664,NM_001027664.3,NM_001268154,NM_001268154.1,NM_066934,NM_066934.4,NM_181930,NM_181930.5,NP_001022835,NP_001022835.1,NP_001255083,NP_001255083.1,NP_499335,NP_499335.2,NP_871659,NP_871659.1,Protein EPG-6, isofor…
celegans@@@TRINITY_DN142_c2_g1_i5.p1	frm-10	FERM domain (Protein4.1-ezrin-radixin-moesin) family; Protein FRM-10, isoform a	https://smart.embl.de/smart/DDvec.cgi?smart=504:B41(67|319)+	179828,CAB02995.1,CBW48364.1,CE09662,CE45332,CELE_F25H9.5,Cel.33082,Cel.39136,E1B6U6,F25H9.5,F25H9.5.1,F25H9.5a,F25H9.5a.1,F25H9.5a.2,F25H9.5b,FERM domain-containing protein,Frm-10,NM_001269578,NM_001269578.1,NM_001269579,NM_001269579.1,NP_001256507,NP_001256507.1,NP_001256508,NP_001256508.1,O02254,O02254_CAEEL,Protein FRM-10, isoform a,UPI000007DB20,UPI0001E43C66,WBGene00001496,cel:CELE_F25H9.5,…
celegans@@@TRINITY_DN3420_c0_g1_i3.p1	glrx-5	Glutaredoxin; Protein GLRX-5 (glrx-5) mRNA, complete cds; Belongs to the glutaredoxin family. Monothiol subfamily	https://smart.embl.de/smart/DDvec.cgi?smart=142:Pfam_Glutaredoxin(47|111)+	176662,CAB11547.1,CE22220,CELE_Y49E10.2,Glrx-5,Glutaredoxin,Monothiol glutaredoxin,NM_067209,NM_067209.6,NP_499610,NP_499610.1,Protein GLRX-5 (glrx-5) mRNA, complete cds,Q9XTU9,Q9XTU9_CAEEL,UPI0000074898,WBGene00013029,Y49E10.2,cel:CELE_Y49E10.2,glrx-5
celegans@@@TRINITY_DN3158_c0_g1_i2.p1	hpo-11	Protein kinase domain-containing protein; Protein HPO-11 (hpo-11) mRNA, complete cds	https://smart.embl.de/smart/DDvec.cgi?smart=649:Pfam_Pkinase_Tyr(60|309)+	186807,A0T1Y0,ABK80859.1,CAA15621.3,CE40614,CELE_H37N21.1,Cel.18465,EF077622,G5ED17,G5ED17_CAEEL,H37N21.1,Hpo-11,NM_059621,NM_059621.3,NP_492022,NP_492022.3,Nuclear receptor-binding protein,Protein HPO-11 (hpo-11) mRNA, complete cds,Protein kinase domain-containing protein,UPI0000E867FC,Uncharacterized protein,WBGene00010427,cel:CELE_H37N21.1,hpo-11
celegans@@@TRINITY_DN2853_c0_g1_i1.p1	ifa-4	Intermediate filament protein ifa-4; Cytoplasmic intermediate filaments provide mechanical strength to cells. Non-essential protein	https://smart.embl.de/smart/DDvec.cgi?smart=575:Filament(69|422)+Pfam_LTD(461|572)+	180765,CAA50181.1,CCD72670.2,CE47884,Cel IF A4,Cel.17732,IF-A4,IFA4_CAEEL,Ifa-4,Intermediate filament protein A4,Intermediate filament protein if,Intermediate filament protein ifa-4,K05B2.3,NM_076435,NM_076435.7,NP_508836,NP_508836.5,P90900,Protein IFA-4 (ifa-4) mRNA, complete cds,Q9GYN4,UPI0000082B30,WBGene00002052,X70833,cel:CELE_K05B2.3,ifa-4
celegans@@@TRINITY_DN673_c0_g1_i2.p1	klp-12	Kinesin-like protein; Protein KLP-12, isoform a (klp-12) mRNA, complete cds; Belongs to the TRAFAC class myosin-kinesin ATPase superfamily. Kinesin family	https://smart.embl.de/smart/DDvec.cgi?smart=1605:KISc(3|366)+COIL(367|392)+COIL(567|736)+COIL(777|803)+COIL(859|884)+COIL(982|1012)+WD40(1273|1310)+WD40(1313|1351)+WD40(1380|1418)+WD40(1421|1467)+WD40(1516|1557)+WD40(1563|1601)+	178057,AB035591,B3GWD7,BAB18763.1,CAB07273.2,CAI46599.1,CAN86600.1,CAQ58111.1,CE37926,CE37927,CE40999,CE42645,CELE_T01G1.1,Cel.5282,G5EFJ0,G5EGS3,G5EGS3_CAEEL,Kinesin-like protein,NM_001028178,NM_001028178.3,NM_001028179,NM_001028179.3,NM_001129324,NM_001129324.2,NM_001136394,NM_001136394.2,NP_001023349,NP_001023349.1,NP_001023350,NP_001023350.1,NP_001122796,NP_001122796.1,NP_001129866,NP_0011298…
celegans@@@TRINITY_DN24170_c0_g1_i1.p1	mboa-6	Lysophospholipid acyltransferase 5; Probable acyltransferase which may mediate the conversion of lysophosphatidylcholine (1-acyl-sn-glycero-3- phosphocholine or LPC) into phosphatidylcholine (1,2-diacyl-sn- glycero-3-phosphocholine or PC) (LPCAT activity). May also catalyze the conversion of lysophosphatidylethanolamine (1-acyl-2- hydroxy-sn-glycero-3-phosphoethanolamine or LPE) into phosphatidyl…	https://smart.embl.de/smart/DDvec.cgi?smart=473:TRANS(20|39)+TRANS(48|70)+Pfam_MBOAT(102|410)+TRANS(431|453)+	175339,2.3.1.-,2.3.1.23,2.3.1.n6,2.3.1.n7,CCD71668.1,CCD71669.1,CE32713,CE33935,Cel.10148,EC 2.3.1.-,EC 2.3.1.23,LPCAT,LPEAT,LPLAT 5,LPSAT,Lyso-PC acyltransferase,Lyso-PE acyltransferase,Lyso-PS acyltransferase,Lysophospholipid acyltransferase 5,Lysophospholipid acyltransferase 5 ,MBOA5_CAEEL,Mboa-6,NM_001027564,NM_001027564.3,NM_001027565,NM_001027565.3,NP_001022735,NP_001022735.1,NP_001022736,N…
celegans@@@TRINITY_DN124_c0_g1_i1.p1	npp-1	Nuclear Pore complex Protein; Protein NPP-1, isoform c	https://smart.embl.de/smart/DDvec.cgi?smart=639:Pfam_Nup54(442|579)+	177836,CAA94281.1,CAB54278.1,CAB54280.1,CE06127,CE23857,CE23858,CELE_K07F5.13,Cel.17408,K07F5.13,K07F5.13a,K07F5.13b,K07F5.13b.1,K07F5.13c,NM_069369,NM_069369.3,NM_069370,NM_069370.3,NM_069371,NM_069371.4,NP_501770,NP_501770.1,NP_501771,NP_501771.1,NP_501772,NP_501772.1,Npp-1,Nuclear Pore complex Protein,Nuclear pore complex protein Nup54,Nup54 domain-containing protein,Protein NPP-1, isoform c,Q…
celegans@@@TRINITY_DN1833_c0_g1_i1.p1	pah-1	Probable phenylalanine-4-hydroxylase 1; Protein PAH-1, isoform b; Belongs to the biopterin-dependent aromatic amino acid hydroxylase family	https://smart.embl.de/smart/DDvec.cgi?smart=457:Pfam_ACT(30|99)+Pfam_Biopterin_H(119|449)+	1.14.16.1,1.14.16.4,174401,AAD31643.1,AF119388,Biogenic amine synthesis protein 2,CAA91286.1,CCH63805.1,CE21050,CE47563,Cel.19578,Cel.39328,EC 1.14.16.1,I2HA98,K08F8.4,K08F8.4a,K08F8.4b,NM_001267255,NM_001267255.1,NM_001267256,NM_001267256.1,NP_001254184,NP_001254184.1,NP_001254185,NP_001254185.1,P90925,PAH,PH4H_CAEEL,Pah-1,Phe-4-monooxygenase,Phenylalanine-4-hydroxylase,Phenylalanine-4-hydroxyla…
celegans@@@TRINITY_DN69_c0_g2_i1.p1	prp-17	Wd_repeats_region domain-containing protein; Yeast PRP (Splicing factor) related; Protein PRP-17 (prp-17) mRNA, complete cds	https://smart.embl.de/smart/DDvec.cgi?smart=567:COIL(192|224)+WD40(264|304)+WD40(308|347)+WD40(350|391)+WD40(394|433)+WD40(483|524)+WD40(527|567)+	172999,CCD71532.1,CE28405,CELE_F49D11.1,Cel.5883,F49D11.1,NM_060450,NM_060450.4,NP_492851,NP_492851.1,O44729,O44729_CAEEL,Pre-mRNA-processing factor 17,Protein PRP-17 (prp-17) mRNA, complete cds,Prp-17,UPI000005C8FB,WBGene00018625,WD_REPEATS_REGION domain-containing protein,Yeast PRP (Splicing factor) related,cel:CELE_F49D11.1,prp-17
celegans@@@TRINITY_DN16006_c0_g1_i1.p1	rhr-1	RH (Rhesus) antigen Related; Protein RHR-1 (rhr-1) mRNA, complete cds; Belongs to the ammonium transporter (TC 2.A.49) family. Rh subfamily	https://smart.embl.de/smart/DDvec.cgi?smart=463:Pfam_Ammonium_transp(20|430)+	178927,AAF97865.1,AF183391,Ammonium transporter Rh,Ammonium_transp domain-containing protein,CCD65593.1,CE09259,CELE_F08F3.3,Cel.19484,F08F3.3,F08F3.3.1,F08F3.3.2,NM_072035,NM_072035.5,NP_001370490,NP_504436,NP_504436.1,Protein RHR-1 (rhr-1) mRNA, complete cds,Q22947,Q22947_CAEEL,Q9N2M4,RH (Rhesus) antigen Related,Rhr-1,UPI000007C0CF,WBGene00004358,cel:CELE_F08F3.3,rhr-1
celegans@@@TRINITY_DN9958_c0_g1_i1.p1	sel-12	Presenilin sel-12; Probable catalytic subunit of the gamma-secretase complex, an endoprotease complex that catalyzes the intramembrane cleavage of integral membrane proteins such as Notch receptors (lin-12 or glp-1). Provides the major presenilin function compared to hop-1 and spe-4. Required cell-autonomously for correct neurite connectivity of the AIY cholinergic interneurons and their correct …	https://smart.embl.de/smart/DDvec.cgi?smart=444:PSN(99|430)+	180441,3.4.23.-,A22.009,AAA85511.1,AAD50991.1,AF171064,CCD70617.1,CE24946,Cel.19557,EC 3.4.23.-,F35H12.3,NM_075774,NM_075774.5,NP_508175,NP_508175.1,P52166,PSN_CAEEL,Presenilin 1 ,Presenilin sel-12,Protein SEL-12 (sel-12) mRNA, complete cds,Q20076,Q9U9C7,Sel-12,Suppressor/enhancer of lin-12 protein 12,U35660,UPI00001327DF,WBGene00004769,cel:CELE_F35H12.3,sel-12
celegans@@@TRINITY_DN18270_c0_g1_i1.p1	sid-2	Systemic RNA interference defective protein 2; Plays a role in RNA-mediated gene silencing by mediating endocytic uptake of double-stranded RNA (dsRNA) ingested from the environment into intestinal cells from the intestinal lumen. Selective for dsRNAs of at least 50 bp	https://smart.embl.de/smart/DDvec.cgi?smart=311:SIGNAL(1|20)+TRANS(189|211)+	176805,AAS45709.1,AY466439,CAB07300.4,CE33908,Cel.9551,G5EEV9,NM_067422,NM_067422.6,NP_499823,NP_499823.2,Protein SID-2 (sid-2) mRNA, complete cds,SID2_CAEEL,Sid-2,Systemic RNA interference defective protein 2,UPI0000190B13,WBGene00004796,ZK520.2,cel:CELE_ZK520.2,sid-2
celegans@@@TRINITY_DN469_c0_g1_i1.p1	strl-1	Steroidogenic acute regulatory-like protein 1; Protein STRL-1, isoform a	https://smart.embl.de/smart/DDvec.cgi?smart=259:SIGNAL(1|20)+START(52|255)+	172846,CAB05736.2,CCA65566.1,CE10852,CE42711,Cel.9106,F52F12.7,F52F12.7a,F52F12.7b,F5GUI0,NM_001264321,NM_001264321.1,NM_001264322,NM_001264322.1,NP_001251250,NP_001251250.1,NP_001251251,NP_001251251.1,O17883,Protein STRL-1, isoform a,STAL1_CAEEL,Steroidogenic acute regulatory-like protein 1,Strl-1,UPI000013C238,UPI00005293A3,WBGene00009940,cel:CELE_F52F12.7,strl-1
celegans@@@TRINITY_DN1690_c0_g1_i1.p2	trap-4	Translocon-associated protein subunit delta; Protein TRAP-4 (trap-4) mRNA, complete cds	https://smart.embl.de/smart/DDvec.cgi?smart=159:Pfam_TRAP-delta(4|158)+	176626,CAB60502.1,CE22589,CELE_Y56A3A.21,NM_067153,NM_067153.4,NP_001370085,NP_499554,NP_499554.1,Protein TRAP-4 (trap-4) mRNA, complete cds,Q9U238,Q9U238_CAEEL,TRanslocon-Associated Protein,Translocon-associated protein subunit delta,Trap-4,UPI00000612C4,WBGene00013238,Y56A3A.21,Y56A3A.21.1,Y56A3A.21.2,cel:CELE_Y56A3A.21,trap-4
celegans@@@TRINITY_DN24853_c0_g1_i1.p1	ttr-49	TransThyretin-Related family domain; Protein TTR-49 (ttr-49) mRNA, complete cds	https://smart.embl.de/smart/DDvec.cgi?smart=174:SIGNAL(1|19)+Pfam_TTR-52(25|99)+	3564895,CCD68598.1,CE37216,CELE_E02C12.13,Cel.30829,E02C12.13,NM_001028590,NM_001028590.4,NP_001023761,NP_001023761.1,Protein TTR-49 (ttr-49) mRNA, complete cds,Q65ZI4,Q65ZI4_CAEEL,TransThyretin-Related family domain,Ttr-49,UPI000042700A,WBGene00023485,cel:CELE_E02C12.13,ttr-49
celegans@@@TRINITY_DN6994_c0_g1_i1.p1	tut-1	Cytoplasmic tRNA 2-thiolation protein 1; Plays a central role in 2-thiolation of mcm(5)S(2)U at tRNA wobble positions of tRNA(Lys), tRNA(Glu) and tRNA(Gln). Directly binds tRNAs and probably acts by catalyzing adenylation of tRNAs, an intermediate required for 2-thiolation. It is unclear whether it acts as a sulfurtransferase that transfers sulfur from thiocarboxylated URM1 onto the uridine of tR…	https://smart.embl.de/smart/DDvec.cgi?smart=373:Pfam_ATP_bind_3(59|257)+Pfam_zn-ribbon_14(287|318)+	176826,2.7.7.-,CCD62179.1,CE17723,CTU1_CAEEL,Cel.13045,Cytoplasmic tRNA 2-thiolation protein 1,Cytoplasmic tRNA 2-thiolation protein 1 ,Cytoplasmic tRNA adenylyltransferase 1,EC 2.7.7.-,F29C4.6,F29C4.6.1,F29C4.6.2,NM_067464,NM_067464.3,NP_499865,NP_499865.1,O76365,Protein TUT-1 (tut-1) mRNA, complete cds,Thiolation of uridine in tRNA protein 1,Tut-1,UPI00000801A2,WBGene00017928,cel:CELE_F29C4.6,c…
celegans@@@TRINITY_DN14712_c0_g1_i1.p1	ugt-57	UDP-GlucuronosylTransferase; Protein UGT-57 (ugt-57) mRNA, complete cds; Belongs to the UDP-glycosyltransferase family	https://smart.embl.de/smart/DDvec.cgi?smart=558:TRANS(5|27)+Pfam_Glyco_tran_28_C(317|478)+	180969,CCD83461.1,CE04327,CELE_F01E11.1,Cel.11076,Cel.35722,F01E11.1,NM_076781,NM_076781.3,NP_509182,NP_509182.1,Protein UGT-57 (ugt-57) mRNA, complete cds,Putative UDP-glucuronosyltransferase ugt-57,Q19082,Q19082_CAEEL,UDP-GlucuronosylTransferase,UDPGT domain-containing protein,UPI000007F6C4,Ugt-57,WBGene00017154,cel:CELE_F01E11.1,ugt-57
celegans@@@TRINITY_DN2176_c0_g1_i1.p2	vha-4	V-type h+-transporting atpase 21kda proteolipid subunit; Vacuolar H ATPase; Protein VHA-4 (vha-4) mRNA, complete cds	https://smart.embl.de/smart/DDvec.cgi?smart=214:TRANS(13|35)+Pfam_ATP-synt_C(54|113)+Pfam_ATP-synt_C(146|205)+	174272,AB000919,BAA22597.1,CAA92686.1,CE03595,CELE_T01H3.1,Cel.19684,G5EDB8,G5EDB8_CAEEL,NM_063258,NM_063258.6,NP_495659,NP_495659.1,Protein VHA-4 (vha-4) mRNA, complete cds,T01H3.1,T01H3.1.1,T01H3.1.2,UPI00000770DE,VHA-4,Vacuolar H ATPase,Vha-4,WBGene00006913,cel:CELE_T01H3.1,vha-4
celegans@@@TRINITY_DN5576_c0_g1_i2.p1	zig-7	Zwei Ig domain protein zig-7; Probably not involved in maintaining the position of ASI and ASH head neuron cell bodies and ventral nerve cord axons of PVQ, PVP, RMEV, AVK and HSN neurons	https://smart.embl.de/smart/DDvec.cgi?smart=239:SIGNAL(1|21)+IG_like(35|123)+IGc2(155|218)+	172096,2 Ig domain protein zig-7,CCD68970.1,CE33929,Cel.38770,F54D7.4,NM_059050,NM_059050.5,NP_491451,NP_491451.2,O44730,Protein ZIG-7 (zig-7) mRNA, complete cds,UPI00001921B3,WBGene00006984,ZIG7_CAEEL,Zig-7,Zwei Ig domain protein zig-7,cel:CELE_F54D7.4,zig-7

## Sheet: Celegans_Enrichment
#category	#category	term ID	term description	observed gene count	background gene count	strength	false discovery rate	matching proteins in your network (IDs)	matching proteins in your network (labels)
6	GO Process	GO:0034446	Substrate adhesion-dependent cell spreading	2	2	3.48	0.0015	6239.C29F9.7,6239.T21D12.4	pat-4,pat-6
6	GO Process	GO:0046716	Muscle cell cellular homeostasis	2	15	2.61	0.0058	6239.C29F9.7,6239.T21D12.4	pat-4,pat-6
6	GO Process	GO:0060298	Positive regulation of sarcomere organization	2	10	2.78	0.0058	6239.C29F9.7,6239.T21D12.4	pat-4,pat-6
6	GO Process	GO:0055002	Striated muscle cell development	2	31	2.29	0.0105	6239.C29F9.7,6239.T21D12.4	pat-4,pat-6
6	GO Process	GO:0040017	Positive regulation of locomotion	2	82	1.87	0.0272	6239.C29F9.7,6239.T21D12.4	pat-4,pat-6
6	GO Process	GO:0030036	Actin cytoskeleton organization	2	93	1.82	0.0321	6239.C29F9.7,6239.T21D12.4	pat-4,pat-6
6	GO Process	GO:0007005	Mitochondrion organization	2	105	1.76	0.0384	6239.C29F9.7,6239.T21D12.4	pat-4,pat-6
6	GO Component	GO:0005925	Focal adhesion	2	5	3.09	0.0011	6239.C29F9.7,6239.T21D12.4	pat-4,pat-6
6	GO Component	GO:0009925	Basal plasma membrane	2	10	2.78	0.0017	6239.C29F9.7,6239.T21D12.4	pat-4,pat-6
6	GO Component	GO:0031430	M band	2	26	2.37	0.0038	6239.C29F9.7,6239.T21D12.4	pat-4,pat-6
6	GO Component	GO:0055120	Striated muscle dense body	2	67	1.96	0.0145	6239.C29F9.7,6239.T21D12.4	pat-4,pat-6
6	STRING clusters	6239_CL:11092	Integrin-mediated signaling pathway, and parvin	2	8	2.88	0.0086	6239.C29F9.7,6239.T21D12.4	pat-4,pat-6
6	COMPARTMENTS	GOCC:0005925	Focal adhesion	2	6	3.01	0.0018	6239.C29F9.7,6239.T21D12.4	pat-4,pat-6
6	COMPARTMENTS	GOCC:0009925	Basal plasma membrane	2	7	2.94	0.0018	6239.C29F9.7,6239.T21D12.4	pat-4,pat-6
6	COMPARTMENTS	GOCC:0045178	Basal part of cell	2	12	2.71	0.0019	6239.C29F9.7,6239.T21D12.4	pat-4,pat-6
6	COMPARTMENTS	GOCC:0030055	Cell-substrate junction	2	17	2.55	0.0027	6239.C29F9.7,6239.T21D12.4	pat-4,pat-6
6	COMPARTMENTS	GOCC:0016323	Basolateral plasma membrane	2	24	2.4	0.0041	6239.C29F9.7,6239.T21D12.4	pat-4,pat-6
6	COMPARTMENTS	GOCC:0031430	M band	2	25	2.39	0.0041	6239.C29F9.7,6239.T21D12.4	pat-4,pat-6
6	COMPARTMENTS	GOCC:0031672	A band	2	31	2.29	0.0048	6239.C29F9.7,6239.T21D12.4	pat-4,pat-6
6	COMPARTMENTS	GOCC:0070161	Anchoring junction	2	52	2.07	0.0114	6239.C29F9.7,6239.T21D12.4	pat-4,pat-6
6	COMPARTMENTS	GOCC:0030016	Myofibril	2	73	1.92	0.0161	6239.C29F9.7,6239.T21D12.4	pat-4,pat-6
6	COMPARTMENTS	GOCC:0030017	Sarcomere	2	66	1.96	0.0161	6239.C29F9.7,6239.T21D12.4	pat-4,pat-6
6	COMPARTMENTS	GOCC:0055120	Striated muscle dense body	2	67	1.96	0.0161	6239.C29F9.7,6239.T21D12.4	pat-4,pat-6
6	COMPARTMENTS	GOCC:0098590	Plasma membrane region	2	105	1.76	0.03	6239.C29F9.7,6239.T21D12.4	pat-4,pat-6
6	COMPARTMENTS	GOCC:0043292	Contractile fiber	2	113	1.73	0.032	6239.C29F9.7,6239.T21D12.4	pat-4,pat-6
6	COMPARTMENTS	GOCC:0030054	Cell junction	2	135	1.65	0.0422	6239.C29F9.7,6239.T21D12.4	pat-4,pat-6
6	UniProt Keywords	KW-0130	Cell adhesion	2	20	2.48	0.0048	6239.C29F9.7,6239.T21D12.4	pat-4,pat-6
4	GO Function	GO:0030172	Troponin c binding	2	4	3.01	0.004	6239.T20B3.2.1,6239.ZK721.2	tni-3,unc-27
4	GO Component	GO:0005861	Troponin complex	2	6	2.83	0.0043	6239.T20B3.2.1,6239.ZK721.2	tni-3,unc-27
4	STRING clusters	6239_CL:22819	Mixed, incl. myofilament, and myosin	3	37	2.22	0.00093	6239.T14G12.3,6239.T20B3.2.1,6239.ZK721.2	tag-18,tni-3,unc-27
4	STRING clusters	6239_CL:22825	Muscle protein, and Troponin T	2	14	2.46	0.0076	6239.T20B3.2.1,6239.ZK721.2	tni-3,unc-27
4	COMPARTMENTS	GOCC:0005861	Troponin complex	2	6	2.83	0.0053	6239.T20B3.2.1,6239.ZK721.2	tni-3,unc-27
4	COMPARTMENTS	GOCC:0005865	Striated muscle thin filament	2	13	2.49	0.01	6239.T20B3.2.1,6239.ZK721.2	tni-3,unc-27
4	COMPARTMENTS	GOCC:0036379	Myofilament	2	20	2.31	0.0146	6239.T20B3.2.1,6239.ZK721.2	tni-3,unc-27
4	UniProt Keywords	KW-0514	Muscle protein	2	13	2.49	0.0066	6239.T20B3.2.1,6239.ZK721.2	tni-3,unc-27
4	UniProt Keywords	KW-0009	Actin-binding	2	48	1.93	0.0382	6239.T20B3.2.1,6239.ZK721.2	tni-3,unc-27
4	Pfam	PF00992	Troponin	2	5	2.91	0.0067	6239.T20B3.2.1,6239.ZK721.2	tni-3,unc-27
4	InterPro	IPR001978	Troponin	2	6	2.83	0.016	6239.T20B3.2.1,6239.ZK721.2	tni-3,unc-27
4	InterPro	IPR038077	Troponin domain superfamily	2	6	2.83	0.016	6239.T20B3.2.1,6239.ZK721.2	tni-3,unc-27
3	STRING clusters	6239_CL:7516	Carbon metabolism, and glutamine family amino acid biosynthetic process	3	82	1.87	0.0093	6239.F56D12.1a.1,6239.W07G4.4,6239.Y17G7B.7	alh-6,lap-2,tpi-1

## Sheet: Cbrenneri
Trinity_name	protein.id	domain_summary_url	annotation	other_names_and_aliases	X.clustering.method	cluster.number	cluster.color	gene.count	protein.description
cbrenneri@@@TRINITY_DN4644_c0_g1_i1.p1	B0334.3	2-hydroxyacyl-CoA lyase 1; Protein B0334.3, isoform a; Belongs to the TPP enzyme family	https://smart.embl.de/smart/DDvec.cgi?smart=634:Pfam_TPP_enzyme_N(72|241)+Pfam_TPP_enzyme_M(261|391)+Pfam_TPP_enzyme_C(455|613)+	174758,2-hydroxyacyl-CoA lyase 1 ,4.1.-.-,B0334.3,B0334.3a,B0334.3a.1,B0334.3a.2,B0334.3b,CAA91372.2,CAA91381.1,CE19658,CE46937,CELE_B0334.3,Cel.7614,EC 4.1.-.-,NM_064053,NM_064053.3,NM_064054,NM_064054.6,NP_496454,NP_496454.1,NP_496455,NP_496455.2,Protein B0334.3, isoform a,Q17474,Q17474_CAEEL,Q17475,UPI000007A07E,UPI0002459458,Uncharacterized protein,WBGene00007143,cel:CELE_B0334.3	MCL	1	Red	18	2-hydroxyacyl-CoA lyase 1; Protein B0334.3, isoform a; Belongs to the TPP enzyme family
cbrenneri@@@TRINITY_DN10917_c0_g1_i1.p1	C31C9.2	D-3-phosphoglycerate dehydrogenase / 2-oxoglutarate reductase; Protein C31C9.2 (C31C9.2) mRNA, complete cds; Belongs to the D-isomer specific 2-hydroxyacid dehydrogenase family	https://smart.embl.de/smart/DDvec.cgi?smart=322:Pfam_2-Hacid_dh_C(111|285)+	1.1.1.399,1.1.1.95,175012,C31C9.2,C31C9.2.1,CAB05694.1,CE08497,CELE_C31C9.2,Cel.6689,EC 1.1.1.399,EC 1.1.1.95,NM_064467,NM_064467.5,NP_496868,NP_496868.1,O17626,O17626_CAEEL,Protein C31C9.2 (C31C9.2) mRNA, complete cds,UPI0000075B1F,Uncharacterized protein,WBGene00007836,cel:CELE_C31C9.2	MCL	1	Red	18	D-3-phosphoglycerate dehydrogenase / 2-oxoglutarate reductase; Protein C31C9.2 (C31C9.2) mRNA, complete cds; Belongs to the D-isomer specific 2-hydroxyacid dehydrogenase family
cbrenneri@@@TRINITY_DN7093_c0_g1_i1.p1	H43I07.2	Dna-directed rna polymerases i and iii subunit rpac1; RNA Polymerase I/III (A/C) shared subunit; Protein RPAC-40 (rpac-40) mRNA, complete cds	https://smart.embl.de/smart/DDvec.cgi?smart=366:RPOLD(67|360)+	178823,CCD68663.1,CE29979,CELE_H43I07.2,Cel.6766,H43I07.2,NM_071765,NM_071765.4,NP_504166,NP_504166.2,Protein RPAC-40 (rpac-40) mRNA, complete cds,Q9UAY9,Q9UAY9_CAEEL,RNA Polymerase I/III (A/C) shared subunit,RPOLD domain-containing protein,Rpac-40,UPI0000074823,WBGene00019275,cel:CELE_H43I07.2,rpac-40	MCL	1	Red	18	Dna-directed rna polymerases i and iii subunit rpac1; RNA Polymerase I/III (A/C) shared subunit; Protein RPAC-40 (rpac-40) mRNA, complete cds
cbrenneri@@@TRINITY_DN5014_c2_g1_i1.p1	K04G2.6	Vacuole morphology and inheritance protein 14; VAC (Yeast VACuole morphology)-Like; Protein VACL-14 (vacl-14) mRNA, complete cds	https://smart.embl.de/smart/DDvec.cgi?smart=694:Pfam_Vac14_Fab1_bd(65|162)+Pfam_Vac14_Fig4_bd(456|634)+	172589,CAB00043.1,CE06100,CELE_K04G2.6,Cel.17009,K04G2.6,K04G2.6.1,NM_059814,NM_059814.3,NP_492215,NP_492215.1,Protein VACL-14 (vacl-14) mRNA, complete cds,Q21225,Q21225_CAEEL,UPI000007C808,VAC (Yeast VACuole morphology)-Like,VAC (yeast VACuole morphology)-Like,Vacl-14,Vacuole morphology and inheritance protein 14,WBGene00010565,cel:CELE_K04G2.6,vacl-14	MCL	1	Red	18	Vacuole morphology and inheritance protein 14; VAC (Yeast VACuole morphology)-Like; Protein VACL-14 (vacl-14) mRNA, complete cds
cbrenneri@@@TRINITY_DN4641_c0_g2_i1.p1	R04B5.5	Pks_er domain-containing protein; Protein R04B5.5 (R04B5.5) mRNA, complete cds	https://smart.embl.de/smart/DDvec.cgi?smart=347:Pfam_ADH_N(28|139)+Pfam_ADH_zinc_N(179|310)+	1.1.1.14,179405,CAA94841.1,CE06215,CELE_R04B5.5,EC 1.1.1.14,L-iditol 2-dehydrogenase ,NM_073190,NM_073190.3,NP_505591,NP_505591.1,PKS_ER domain-containing protein,Protein R04B5.5 (R04B5.5) mRNA, complete cds,Q21702,Q21702_CAEEL,R04B5.5,UPI000007CA24,Uncharacterized protein,WBGene00011003,cel:CELE_R04B5.5	MCL	1	Red	18	Pks_er domain-containing protein; Protein R04B5.5 (R04B5.5) mRNA, complete cds
cbrenneri@@@TRINITY_DN4689_c0_g1_i1.p1	W09D10.4	Protein phosphatase ptc7; Protein W09D10.4 (W09D10.4) mRNA, complete cds	https://smart.embl.de/smart/DDvec.cgi?smart=330:PP2C_SIG(95|329)+	176497,3.1.3.16,CAB07860.1,CE16565,CELE_W09D10.4,Cel.9917,EC 3.1.3.16,NM_066961,NM_066961.4,NP_499362,NP_499362.1,O18183,O18183_CAEEL,Protein W09D10.4 (W09D10.4) mRNA, complete cds,Protein phosphatase,Protein phosphatase PTC7 ,UPI000007B86D,Uncharacterized protein,W09D10.4,WBGene00012362,cel:CELE_W09D10.4	MCL	1	Red	18	Protein phosphatase ptc7; Protein W09D10.4 (W09D10.4) mRNA, complete cds
cbrenneri@@@TRINITY_DN1561_c0_g1_i2.p1	ZK370.4	Uncharacterized NTE family protein ZK370.4; Protein ZK370.4, isoform a (ZK370.4) mRNA, complete cds; Belongs to the NTE family	https://smart.embl.de/smart/DDvec.cgi?smart=1353:TRANS(2|19)+TRANS(23|45)+cNMP(238|373)+Pfam_cNMP_binding(462|567)+cNMP(578|690)+Pfam_Patatin(942|1108)+	176225,3.1.1.5,CCD61723.1,CCD61724.1,CE34454,CE34455,Cel.8827,EC 3.1.1.5,FO080164,Lysophospholipid hydrolase ,NM_066525,NM_066525.2,NM_066526,NM_066526.4,NP_498926,NP_498926.2,NP_498927,NP_498927.2,Q02331,Q6LDE9,Q6LDF0,Q95PX1,UPI00001A9924,UPI00001A9925,Uncharacterized NTE family protein ZK370.4,WBGene00022718,YOL4_CAEEL,ZK370.4,ZK370.4a,ZK370.4b,cel:CELE_ZK370.4	MCL	1	Red	18	Uncharacterized NTE family protein ZK370.4; Protein ZK370.4, isoform a (ZK370.4) mRNA, complete cds; Belongs to the NTE family
cbrenneri@@@TRINITY_DN372_c0_g1_i2.p1	acdh-8	Acyl-coa dehydrogenase; Acyl CoA DeHydrogenase; Protein ACDH-8 (acdh-8) mRNA, complete cds	https://smart.embl.de/smart/DDvec.cgi?smart=412:Pfam_Acyl-CoA_dh_N(26|136)+Pfam_Acyl-CoA_dh_M(141|239)+Pfam_Acyl-CoA_dh_2(267|389)+	1.3.8.7,173979,Acdh-8,Acyl CoA DeHydrogenase,Acyl-CoA dehydrogenase ,CCD69143.1,CE02807,CELE_K05F1.3,EC 1.3.8.7,K05F1.3,NM_062741,NM_062741.6,NP_495142,NP_495142.1,Probable acyl-CoA dehydrogenase,Protein ACDH-8 (acdh-8) mRNA, complete cds,Q21243,Q21243_CAEEL,UPI000007AB1F,WBGene00019406,acdh-8,cel:CELE_K05F1.3	MCL	1	Red	18	Acyl-coa dehydrogenase; Acyl CoA DeHydrogenase; Protein ACDH-8 (acdh-8) mRNA, complete cds
cbrenneri@@@TRINITY_DN7431_c0_g1_i1.p1	acs-1	Fatty Acid CoA Synthetase family; Protein ACS-1, isoform b (acs-1) mRNA, complete cds	https://smart.embl.de/smart/DDvec.cgi?smart=623:Pfam_AMP-binding(72|510)+Pfam_AMP-binding_C(518|597)+	179043,Acs-1,CCD71310.1,CCD71311.1,CCD71312.1,CE20812,CE37771,CE37772,CELE_F46E10.1,Cel.3542,F46E10.1,F46E10.1a,F46E10.1b.1,F46E10.1b.2,F46E10.1c.1,F46E10.1c.2,Fatty Acid CoA Synthetase family,NM_001028766,NM_001028766.3,NM_001028767,NM_001028767.4,NM_001028768,NM_001028768.3,NP_001023937,NP_001023937.1,NP_001023938,NP_001023938.1,NP_001023939,NP_001023939.1,Q5TKA3,Q5TKA4,Q9UAV8,Q9UAV8_CAEEL,UPI0…	MCL	1	Red	18	Fatty Acid CoA Synthetase family; Protein ACS-1, isoform b (acs-1) mRNA, complete cds
cbrenneri@@@TRINITY_DN6198_c0_g1_i1.p1	ech-7	Enoyl-CoA Hydratase; Protein ECH-7 (ech-7) mRNA, complete cds; Belongs to the enoyl-CoA hydratase/isomerase family	https://smart.embl.de/smart/DDvec.cgi?smart=256:Pfam_ECH_2(13|192)+	173300,4.2.1.17,CAC48118.1,CE25707,CELE_Y105E8A.4,EC 4.2.1.17,Ech-7,Enoyl-CoA Hydratase,Enoyl-CoA hydratase ,NM_170936,NM_170936.3,NP_740932,NP_740932.1,Protein ECH-7 (ech-7) mRNA, complete cds,Q9NEZ8,Q9NEZ8_CAEEL,UPI000006122D,WBGene00001156,Y105E8A.4,cel:CELE_Y105E8A.4,ech-7	MCL	1	Red	18	Enoyl-CoA Hydratase; Protein ECH-7 (ech-7) mRNA, complete cds; Belongs to the enoyl-CoA hydratase/isomerase family
cbrenneri@@@TRINITY_DN26618_c0_g1_i1.p1	eif-3.C	Eukaryotic translation initiation factor 3 subunit C; Component of the eukaryotic translation initiation factor 3 (eIF-3) complex, which is involved in protein synthesis of a specialized repertoire of mRNAs and, together with other initiation factors, stimulates binding of mRNA and methionyl-tRNAi to the 40S ribosome. The eIF-3 complex specifically targets and initiates translation of a subset of…	https://smart.embl.de/smart/DDvec.cgi?smart=898:Pfam_eIF-3c_N(31|662)+PINT(735|823)+	172858,CAB03403.1,CE18958,Cel.16885,EIF3C_CAEEL,Eif-3.C,NM_060237,NM_060237.3,NP_492638,NP_492638.1,O02328,Protein EIF-3.C (eif-3.C) mRNA, complete cds,T23D8.4,Translation initiation factor 3 subunit C,UPI000012D308,WBGene00001226,cel:CELE_T23D8.4,eIF3c,eif-3.C	MCL	1	Red	18	Eukaryotic translation initiation factor 3 subunit C; Component of the eukaryotic translation initiation factor 3 (eIF-3) complex, which is involved in protein synthesis of a specialized repertoire of mRNAs and, together with other initiation factors, stimulates binding of mRNA and methionyl-tRNAi to the 40S ribosome. The eIF-3 complex specifically targets and initiates translation of a subset of…
cbrenneri@@@TRINITY_DN5068_c0_g1_i1.p1	eri-1	3'-5' exoribonuclease 1; 3'-5' exonuclease eri-1; RNA exonuclease that acts as a negative regulator of RNA interference (RNAi). Probably acts by degrading the 3'-overhangs of short interfering RNAs (siRNAs). Its tissue specificity may help explain the inefficiency of neuronal RNAi	https://smart.embl.de/smart/DDvec.cgi?smart=582:SAP(92|126)+EXOIII(150|339)+	176868,3'-5' exonuclease eri-1,3'-5' exoribonuclease 1 ,3.1.-.-,CCD73975.1,CCD73976.1,CE17214,CE30163,CE48636,CE49054,Cel.12380,EC 3.1.-.-,ERI1_CAEEL,Enhanced RNAi protein,Eri-1,NM_171244,NM_171244.4,NM_171245,NM_171245.4,NP_741292,NP_741292.1,NP_741293,NP_741293.1,O44406,O44407,Protein ERI-1, isoform b,T07A9.5,T07A9.5a,T07A9.5b,T07A9.5c,T07A9.5d,UPI00000786A0,UPI000007D425,UPI0003B0B096,UPI0003B…	MCL	1	Red	18	3'-5' exoribonuclease 1; 3'-5' exonuclease eri-1; RNA exonuclease that acts as a negative regulator of RNA interference (RNAi). Probably acts by degrading the 3'-overhangs of short interfering RNAs (siRNAs). Its tissue specificity may help explain the inefficiency of neuronal RNAi
cbrenneri@@@TRINITY_DN5002_c0_g1_i2.p1	fars-3	Phenylalanyl-trna synthetase beta chain; Phenylalanine--tRNA ligase beta subunit; Protein FARS-3 (fars-3) mRNA, complete cds	https://smart.embl.de/smart/DDvec.cgi?smart=591:B3_4(118|280)+B5(306|375)+	174351,6.1.1.20,CAA90360.1,CE20708,Cel.4994,EC 6.1.1.20,F22B5.9,Fars-3,NM_063384,NM_063384.6,NP_495785,NP_495785.1,PheRS,Phenylalanine--tRNA ligase beta subunit,Phenylalanyl-tRNA synthetase beta chain ,Phenylalanyl-tRNA synthetase beta subunit,Protein FARS-3 (fars-3) mRNA, complete cds,Q19713,SYFB_CAEEL,UPI0000136441,WBGene00001498,Z50044,cel:CELE_F22B5.9,fars-3,frs-2	MCL	1	Red	18	Phenylalanyl-trna synthetase beta chain; Phenylalanine--tRNA ligase beta subunit; Protein FARS-3 (fars-3) mRNA, complete cds
cbrenneri@@@TRINITY_DN8699_c0_g1_i2.p1	grld-1	Glutamate Receptor Level Decreased; Protein GRLD-1, isoform c	https://smart.embl.de/smart/DDvec.cgi?smart=520:RRM(35|111)+RRM(170|243)+RRM(252|321)+Pfam_SPOC(366|515)+	176827,CCD62180.1,CCD62181.1,CCD62182.1,CE17724,CE31493,CE37226,CELE_F29C4.7,Cel.13044,F29C4.7,F29C4.7a,F29C4.7a.1,F29C4.7a.2,F29C4.7b.1,F29C4.7b.2,F29C4.7c,Glutamate Receptor Level Decreased,Grld-1,H2KYB8,H2KYB8_CAEEL,H2KYB9,NM_001027990,NM_001027990.3,NM_171237,NM_171237.5,NM_171238,NM_171238.3,NP_001023161,NP_001023161.1,NP_741283,NP_741283.1,NP_741284,NP_741284.1,Protein GRLD-1, isoform c,Q8M…	MCL	1	Red	18	Glutamate Receptor Level Decreased; Protein GRLD-1, isoform c
cbrenneri@@@TRINITY_DN8997_c0_g1_i1.p1	idi-1	Nudix hydrolase domain-containing protein; Isopentenyl-diphosphate isomerase; Protein IDI-1 (idi-1) mRNA, complete cds	https://smart.embl.de/smart/DDvec.cgi?smart=236:Pfam_NUDIX(60|204)+	176142,5.3.3.2,AAT08468.1,AY597336,CCD64456.1,CE26944,CELE_K06H7.9,Cel.10301,EC 5.3.3.2,FO080533,G5EFQ1,G5EFQ1_CAEEL,Idi-1,Isopentenyl-diphosphate Delta-isomerase ,Isopentenyl-diphosphate isomerase,K06H7.9,NM_066365,NM_066365.5,NP_001370428,NP_498766,NP_498766.1,Nudix hydrolase domain-containing protein,Protein IDI-1 (idi-1) mRNA, complete cds,UPI000007C2E7,WBGene00019460,cel:CELE_K06H7.9,idi-1	MCL	1	Red	18	Nudix hydrolase domain-containing protein; Isopentenyl-diphosphate isomerase; Protein IDI-1 (idi-1) mRNA, complete cds
cbrenneri@@@TRINITY_DN882_c0_g1_i2.p1	pdha-1	Probable pyruvate dehydrogenase E1 component subunit alpha, mitochondrial; The pyruvate dehydrogenase complex catalyzes the overall conversion of pyruvate to acetyl-CoA and CO(2). It contains multiple copies of three enzymatic components: pyruvate dehydrogenase (E1), dihydrolipoamide acetyltransferase (E2) and lipoamide dehydrogenase (E3)	https://smart.embl.de/smart/DDvec.cgi?smart=414:Pfam_E1_dh(77|373)+	1.2.4.1,3565996,CAA87793.1,CAD59156.1,CE01643,CE32929,Cel.38645,EC 1.2.4.1,NM_063292,NM_063292.4,NM_182153,NM_182153.4,NP_495693,NP_495693.1,NP_871953,NP_871953.1,ODPA_CAEEL,P52899,PDHE1-A,Pdha-1,Protein PDHA-1, isoform b,Q8I111,T05H10.6,T05H10.6a,T05H10.6a.1,T05H10.6a.2,T05H10.6a.3,T05H10.6b,UPI0000086516,UPI0000130C0E,WBGene00011510,cel:CELE_T05H10.6,pdha-1	MCL	1	Red	18	Probable pyruvate dehydrogenase E1 component subunit alpha, mitochondrial; The pyruvate dehydrogenase complex catalyzes the overall conversion of pyruvate to acetyl-CoA and CO(2). It contains multiple copies of three enzymatic components: pyruvate dehydrogenase (E1), dihydrolipoamide acetyltransferase (E2) and lipoamide dehydrogenase (E3)
cbrenneri@@@TRINITY_DN14621_c0_g1_i1.p1	prx-10	Tryptophan--tRNA ligase, mitochondrial; Catalyzes the attachment of tryptophan to tRNA(Trp); Belongs to the class-I aminoacyl-tRNA synthetase family	https://smart.embl.de/smart/DDvec.cgi?smart=360:Pfam_tRNA-synt_1b(26|316)+	175719,6.1.1.2,AB096634,BAC76734.1,C0HKD6,C34E10.4,C34E10.4a,C34E10.4b,CCD66648.1,CCD66656.1,CE37710,CE44834,Cel.23360,Cel.39087,NM_001026029,NM_001026029.3,NM_001026030,NM_001026030.3,NP_001021200,NP_001021200.2,NP_001021201,NP_001021201.1,P46579,Q5TYM1,Q7Z259,SYWM_CAEEL,TrpRS,Tryptophan--tRNA ligase, mitochondrial,Tryptophanyl-tRNA synthetase,UPI000019AD78,UPI0001F779D2,WBGene00006946,prx-10,wa…	MCL	1	Red	18	Tryptophan--tRNA ligase, mitochondrial; Catalyzes the attachment of tryptophan to tRNA(Trp); Belongs to the class-I aminoacyl-tRNA synthetase family
cbrenneri@@@TRINITY_DN1948_c0_g2_i1.p1	sur-5	Acetoacetyl-CoA synthetase; Activates acetoacetate to acetoacetyl-CoA (By similarity). Negatively regulates let-60 Ras activity during vulval induction; Belongs to the ATP-dependent AMP-binding enzyme family	https://smart.embl.de/smart/DDvec.cgi?smart=700:Pfam_ACAS_N(76|134)+Pfam_AMP-binding(133|578)+Pfam_AMP-binding_C(586|665)+	180992,6.2.1.16,AAM44123.1,AY091467,Acetoacetyl-CoA synthetase,Acetoacetyl-CoA synthetase ,CCD72541.1,CE04713,Cel.22610,Cel.33255,EC 6.2.1.16,K03A1.5,NM_076828,NM_076828.5,NP_509229,NP_509229.1,Protein SUR-5 (sur-5) mRNA, complete cds,Q21166,SUR5_CAEEL,Suppressor of activated let-60 Ras protein 5,Sur-5,UPI0000077B81,WBGene00006351,cel:CELE_K03A1.5,sur-5	MCL	1	Red	18	Acetoacetyl-CoA synthetase; Activates acetoacetate to acetoacetyl-CoA (By similarity). Negatively regulates let-60 Ras activity during vulval induction; Belongs to the ATP-dependent AMP-binding enzyme family
cbrenneri@@@TRINITY_DN4_c0_g1_i1.p1	B0303.7	Uncharacterized protein b0303.7; Protein B0303.7, isoform a	https://smart.embl.de/smart/DDvec.cgi?smart=493:SH3(194|251)+SH3(274|329)+SH3(358|413)+SH3(434|493)+	176220,A9Z1J8,B0303.7,B0303.7a,B0303.7b,CCD61710.1,CCD61717.1,CE36521,CE41973,Cel.6390,NM_001129199,NM_001129199.2,NM_066517,NM_066517.6,NP_001122671,NP_001122671.1,NP_498918,NP_498918.3,P34258,Protein B0303.7, isoform a,UPI00003529D0,UPI000162B543,Uncharacterized protein,Uncharacterized protein B0303.7,WBGene00015128,YKA7_CAEEL,cel:CELE_B0303.7	MCL	2	Brown	11	Uncharacterized protein b0303.7; Protein B0303.7, isoform a
cbrenneri@@@TRINITY_DN7009_c0_g1_i1.p1	B0507.2	BRO1 domain-containing protein BROX homolog; Protein B0507.2 (B0507.2) mRNA, complete cds; Belongs to the BROX family	https://smart.embl.de/smart/DDvec.cgi?smart=427:BRO1(4|395)+	179255,B0507.2,BRO1 domain-containing protein BROX homolog,BROX_CAEEL,CCD62069.1,CE32561,NM_072860,NM_072860.5,NP_001370343,NP_505261,NP_505261.2,Protein B0507.2 (B0507.2) mRNA, complete cds,Q22885,UPI00000839E9,WBGene00015219,cel:CELE_B0507.2	MCL	2	Brown	11	BRO1 domain-containing protein BROX homolog; Protein B0507.2 (B0507.2) mRNA, complete cds; Belongs to the BROX family
cbrenneri@@@TRINITY_DN2323_c0_g2_i2.p1	T05E7.3	Wash complex subunit strumpellin; Protein T05E7.3 (T05E7.3) mRNA, complete cds	https://smart.embl.de/smart/DDvec.cgi?smart=997:Pfam_Strumpellin(17|716)+Pfam_Strumpellin(724|934)+	172306,CCD73362.1,CE13235,CELE_T05E7.3,Cel.34891,NM_059383,NM_059383.3,NP_491784,NP_491784.1,O01858,O01858_CAEEL,Protein T05E7.3 (T05E7.3) mRNA, complete cds,T05E7.3,UPI000007FB7B,Uncharacterized protein,WASH complex subunit strumpellin,WBGene00020259,cel:CELE_T05E7.3	MCL	2	Brown	11	Wash complex subunit strumpellin; Protein T05E7.3 (T05E7.3) mRNA, complete cds
cbrenneri@@@TRINITY_DN25064_c0_g1_i1.p1	T26A5.4	Asparagine Linked Glycosylation (ALG) homolog, Nematode; Protein T26A5.4 (T26A5.4) mRNA, complete cds	https://smart.embl.de/smart/DDvec.cgi?smart=491:TRANS(79|101)+TRANS(108|130)+Pfam_Glyco_trans_1_4(266|412)+TRANS(466|488)+	175920,2.4.1.142,Algn-1,Beta-1,4-mannosyltransferase ,CCD63217.1,CE42024,CELE_T26A5.4,Cel.9984,EC 2.4.1.142,NM_066019,NM_066019.6,NP_498420,NP_498420.2,Protein T26A5.4 (T26A5.4) mRNA, complete cds,Q22797,Q22797_CAEEL,T26A5.4,UPI000162B579,WBGene00020820,algn-1,cel:CELE_T26A5.4	MCL	2	Brown	11	Asparagine Linked Glycosylation (ALG) homolog, Nematode; Protein T26A5.4 (T26A5.4) mRNA, complete cds
cbrenneri@@@TRINITY_DN4180_c0_g1_i1.p1	T27F7.1	Related to yeast Vacuolar Protein Sorting factor; Protein T27F7.1 (T27F7.1) mRNA, complete cds; Belongs to the SNF7 family	https://smart.embl.de/smart/DDvec.cgi?smart=208:Pfam_Snf7(16|185)+	173863,CCD72089.1,CE27211,CELE_T27F7.1,Charged multivesicular body protein 3,NM_062518,NM_062518.5,NP_494919,NP_494919.1,Protein T27F7.1 (T27F7.1) mRNA, complete cds,Q9GYK4,Q9GYK4_CAEEL,Related to yeast Vacuolar Protein Sorting factor,T27F7.1,T27F7.1.1,T27F7.1.2,T27F7.1.3,UPI0000081810,Vps-24,WBGene00020866,cel:CELE_T27F7.1,vps-24	MCL	2	Brown	11	Related to yeast Vacuolar Protein Sorting factor; Protein T27F7.1 (T27F7.1) mRNA, complete cds; Belongs to the SNF7 family
cbrenneri@@@TRINITY_DN2044_c0_g1_i1.p1	Y51F10.10	Uncharacterized protein; Protein Y51F10.10 (Y51F10.10) mRNA, complete cds	http://smart.embl.de/smart/DDt.cgi?smart=337:	245997,CCD73479.1,CE31380,CELE_Y51F10.10,Cel.20474,NM_170811,NM_170811.5,NP_740794,NP_740794.1,Protein Y51F10.10 (Y51F10.10) mRNA, complete cds,Q8WTK0,Q8WTK0_CAEEL,UBA domain-containing protein,UPI0000083846,Uncharacterized protein,WBGene00021771,Y51F10.10,Y51F10.10a,spe-48	MCL	2	Brown	11	Uncharacterized protein; Protein Y51F10.10 (Y51F10.10) mRNA, complete cds
cbrenneri@@@TRINITY_DN23072_c0_g3_i1.p1	har-1	Coiled-coil-helix-coiled-coil-helix domain-containing protein 2; Protein HAR-1 (har-1) mRNA, complete cds	https://smart.embl.de/smart/DDvec.cgi?smart=154:Pfam_CHCH(119|152)+	175529,C16C10.11,C16C10.11.1,CAA86749.1,CE01491,HAR1_CAEEL,Har-1,Hemiasterlin resistant protein 1,NM_065425,NM_065425.3,NP_497826,NP_497826.1,Protein HAR-1 (har-1) mRNA, complete cds,Q09254,UPI0000060EFE,WBGene00007630,cel:CELE_C16C10.11,har-1	MCL	2	Brown	11	Coiled-coil-helix-coiled-coil-helix domain-containing protein 2; Protein HAR-1 (har-1) mRNA, complete cds
cbrenneri@@@TRINITY_DN200_c0_g1_i2.p1	tsg-101	Tumor Susceptibility Gene homolog; Protein TSG-101 (tsg-101) mRNA, complete cds	https://smart.embl.de/smart/DDvec.cgi?smart=425:UBCc(23|173)+COIL(294|336)+Pfam_Vps23_core(353|416)+	182474,C09G12.9,CCD64026.1,CE34675,CELE_C09G12.9,ESCRT-I complex subunit TSG101,FO080481,NM_067963,NM_067963.2,NP_500364,NP_500364.2,O76258,O76258_CAEEL,Protein TSG-101 (tsg-101) mRNA, complete cds,Tsg-101,Tumor Susceptibility Gene homolog,UPI00001B4CEB,WBGene00015658,cel:CELE_C09G12.9,tsg-101	MCL	2	Brown	11	Tumor Susceptibility Gene homolog; Protein TSG-101 (tsg-101) mRNA, complete cds
cbrenneri@@@TRINITY_DN25158_c0_g1_i1.p1	vps-35	Vacuolar protein sorting-associated protein 35; Plays a role in vesicular protein sorting	https://smart.embl.de/smart/DDvec.cgi?smart=821:Pfam_Vps35(14|771)+COIL(775|807)+	174000,A1X3T7,ABD75715.1,CCD70154.1,CE39945,CELE_F59G1.3,Cel.5213,DQ178636,F59G1.3,F59G1.3a,FO081244,NM_062779,NM_062779.4,NP_495180,NP_495180.2,Protein VPS-35 (vps-35) mRNA, complete cds,Q21053,Q21053_CAEEL,UPI00006CA2C2,Vacuolar protein sorting-associated protein 35,Vps-35,WBGene00006933,cel:CELE_F59G1.3,vps-35	MCL	2	Brown	11	Vacuolar protein sorting-associated protein 35; Plays a role in vesicular protein sorting
cbrenneri@@@TRINITY_DN3146_c0_g1_i1.p1	vti-1	VTI (Vesicle Transport through t-SNARE Interaction) homolog; Protein VTI-1 (vti-1) mRNA, complete cds	https://smart.embl.de/smart/DDvec.cgi?smart=224:Pfam_V-SNARE(18|98)+t_SNARE(127|194)+TRANS(203|221)+	178397,CAB16506.2,CE28871,CELE_Y57G11C.4,NM_070380,NM_070380.3,NP_502781,NP_502781.1,O18230,O18230_CAEEL,Protein VTI-1 (vti-1) mRNA, complete cds,UPI0000075904,Vti-1,WBGene00013302,Y57G11C.4,cel:CELE_Y57G11C.4,vti-1	MCL	2	Brown	11	VTI (Vesicle Transport through t-SNARE Interaction) homolog; Protein VTI-1 (vti-1) mRNA, complete cds
cbrenneri@@@TRINITY_DN5554_c0_g2_i1.p1	R08D7.5	Uncharacterized calcium-binding protein r08d7.5; Protein R08D7.5 (R08D7.5) mRNA, complete cds	https://smart.embl.de/smart/DDvec.cgi?smart=148:EFh(81|109)+EFh(117|145)+	187699,CAA78051.2,CE33292,Cel.10205,NM_066585,NM_066585.2,NM_066585.3,NP_498986,NP_498986.2,NP_498986.3,P30644,Protein R08D7.5 (R08D7.5) mRNA, complete cds,R08D7.5,UPI000000CA62,Uncharacterized calcium-binding protein R08D7.5,WBGene00011145,YNE5_CAEEL,cel:CELE_R08D7.5	MCL	3	Dark Golden Rod	5	Uncharacterized calcium-binding protein r08d7.5; Protein R08D7.5 (R08D7.5) mRNA, complete cds
cbrenneri@@@TRINITY_DN9538_c0_g2_i1.p1	lig-1	DNA ligase 1; DNA ligase that seals nicks in double-stranded DNA during DNA replication, DNA recombination and DNA repair	https://smart.embl.de/smart/DDvec.cgi?smart=773:Pfam_DNA_ligase_A_N(20|195)+Pfam_DNA_ligase_A_M(263|465)+Pfam_DNA_ligase_A_C(490|601)+	179502,6.5.1.1,6.5.1.6,6.5.1.7,C29A12.3,C29A12.3a,C29A12.3b,CAA98242.2,CAD44112.2,CE37480,CE37481,Cel.23475,DNA ligase 1,DNA ligase 1 ,DNA ligase I,DNLI1_CAEEL,EC 6.5.1.1,EC 6.5.1.6,EC 6.5.1.7,Lig-1,NM_171537,NM_171537.3,NM_171538,NM_171538.3,NP_741625,NP_741625.2,NP_741626,NP_741626.2,Polydeoxyribonucleotide synthase [ATP] 1,Protein LIG-1, isoform a,Q27474,Q8MQB3,UPI000044F5FA,UPI000044F5FB,WBGe…	MCL	3	Dark Golden Rod	5	DNA ligase 1; DNA ligase that seals nicks in double-stranded DNA during DNA replication, DNA recombination and DNA repair
cbrenneri@@@TRINITY_DN6108_c0_g1_i1.p1	mdt-30	Glutamine/asparagine-rich protein mdt-30; Protein MDT-30 (mdt-30) mRNA, complete cds	https://smart.embl.de/smart/DDvec.cgi?smart=466:COIL(411|436)+	176130,CCD63450.1,CE29043,Cel.10476,F44B9.7,Glutamine/asparagine-rich protein mdt-30,MDT30_CAEEL,Mdt-30,NM_066348,NM_066348.4,NP_498749,NP_498749.1,P34428,Prion-like-(Q/N-rich) domain-bearing protein 38,Protein MDT-30 (mdt-30) mRNA, complete cds,UPI000013B7BB,WBGene00004125,cel:CELE_F44B9.7,mdt-30,pqn-38	MCL	3	Dark Golden Rod	5	Glutamine/asparagine-rich protein mdt-30; Protein MDT-30 (mdt-30) mRNA, complete cds
cbrenneri@@@TRINITY_DN2129_c0_g2_i1.p1	msh-2	DNA_MISMATCH_REPAIR_2 domain-containing protein; MSH (MutS Homolog) family; Protein MSH-2 (msh-2) mRNA, complete cds	https://smart.embl.de/smart/DDvec.cgi?smart=849:Pfam_MutS_I(13|118)+MUTSd(294|617)+MUTSac(632|818)+	171938,CCD68358.1,CE21000,CELE_H26D21.2,Cel.18407,DNA mismatch repair protein MSH2,DNA_MISMATCH_REPAIR_2 domain-containing protein,FO080998,H26D21.2,MSH (MutS Homolog) family,Msh-2,NM_058801,NM_058801.5,NP_491202,NP_491202.1,Protein MSH-2 (msh-2) mRNA, complete cds,Q9TXR4,Q9TXR4_CAEEL,UPI0000074D22,WBGene00003418,cel:CELE_H26D21.2,msh-2	MCL	3	Dark Golden Rod	5	DNA_MISMATCH_REPAIR_2 domain-containing protein; MSH (MutS Homolog) family; Protein MSH-2 (msh-2) mRNA, complete cds
cbrenneri@@@TRINITY_DN658_c0_g1_i2.p1	erm-1	Ferm domain-containing protein; Ezrin/Radixin/Moesin; Protein ERM-1, isoform b (erm-1) mRNA, complete cds	https://smart.embl.de/smart/DDvec.cgi?smart=564:B41(3|208)+FERM_C(212|301)+Pfam_ERM(333|564)+	172174,AAT66914.1,AAT66915.1,AB107268,AB107269,AB107270,AY643538,AY643539,BAC98354.1,BAC98355.1,BAC98356.1,BAC98357.1,BAC98358.1,C01G8.5,C01G8.5a,C01G8.5b,CCD62462.1,CCD62463.1,CE07805,CE07806,CELE_C01G8.5,Cel.5070,ERM-1B,Erm-1,Ezrin/Radixin/Moesin,FERM domain-containing protein,G5EBK3,G5EBK3_CAEEL,G5EES2,G5EGU8,NM_059158,NM_059158.6,NM_059159,NM_059159.3,NP_491559,NP_491559.1,NP_491560,NP_491560…	MCL	4	Green Yellow	3	Ferm domain-containing protein; Ezrin/Radixin/Moesin; Protein ERM-1, isoform b (erm-1) mRNA, complete cds
cbrenneri@@@TRINITY_DN3406_c0_g1_i2.p1	wrk-1	Wrapper/Rega-1/Klingon homolog; Protein WRK-1, isoform d (wrk-1) mRNA, complete cds	https://smart.embl.de/smart/DDvec.cgi?smart=452:IG(24|114)+IGc2(138|202)+IGc2(236|311)+FN3(320|410)+	181093,AAL60233.1,AAL60234.1,AAL60235.1,AF456362,AF456363,AF456364,CCD69042.1,CCD69043.1,CCD69044.1,CCD69045.1,CCD69046.1,CE30985,CE30986,CE30987,CE34015,CE37643,CELE_F41D9.3,Cel.33426,Cel.9175,F41D9.3,F41D9.3a,F41D9.3b,F41D9.3c,F41D9.3d,F41D9.3e,H2KZN8,H2KZN9,H2KZP0,NM_001029476,NM_001029476.1,NM_001029477,NM_001029477.3,NM_001029478,NM_001029478.2,NM_001029479,NM_001029479.2,NM_001029480,NM_001…	MCL	4	Green Yellow	3	Wrapper/Rega-1/Klingon homolog; Protein WRK-1, isoform d (wrk-1) mRNA, complete cds
cbrenneri@@@TRINITY_DN2543_c0_g1_i1.p1	zoo-1	ZO-1 (Zonula Occludens tight junctional protein) Ortholog; Protein ZOO-1, isoform a	https://smart.embl.de/smart/DDvec.cgi?smart=1172:PDZ(54|131)+PDZ(141|222)+PDZ(342|413)+SH3(428|498)+GuKc(526|699)+Pfam_ZU5(1041|1142)+	173316,CAD56252.2,CAI79187.1,CCF23323.1,CCF23324.1,CCF23325.1,CE38437,CE38438,CE46849,CE46988,CE47054,CELE_Y105E8A.26,Cel.24093,H1UBK8,H1UBK9,H1UBL0,NM_001026514,NM_001026514.3,NM_001026515,NM_001026515.3,NM_001265447,NM_001265447.1,NM_001265448,NM_001265448.1,NM_001265449,NM_001265449.1,NP_001021685,NP_001021685.1,NP_001021686,NP_001021686.1,NP_001252376,NP_001252376.1,NP_001252377,NP_001252377.…	MCL	4	Green Yellow	3	ZO-1 (Zonula Occludens tight junctional protein) Ortholog; Protein ZOO-1, isoform a
cbrenneri@@@TRINITY_DN7928_c0_g2_i1.p1	C53A5.6	Ring-type domain-containing protein; Protein C53A5.6, isoform a (C53A5.6) mRNA, complete cds	https://smart.embl.de/smart/DDvec.cgi?smart=573:RING(9|48)+Kelch(335|381)+Kelch(382|427)+Kelch(428|474)+Kelch(475|522)+Kelch(523|569)+	183737,C53A5.6,C53A5.6a,C53A5.6b,CAB03987.1,CBL43425.1,CE08955,CE44769,CELE_C53A5.6,Cel.29324,D5MCU1,D5MCU1_CAEEL,NM_001269667,NM_001269667.1,NM_001269668,NM_001269668.1,NP_001256596,NP_001256596.1,NP_001256597,NP_001256597.1,NP_001366883,O17698,RING-type domain-containing protein,UPI0000079DDA,UPI0001CF3879,Uncharacterized protein,WBGene00008266,cel:CELE_C53A5.6	MCL	5	Green 2	3	Ring-type domain-containing protein; Protein C53A5.6, isoform a (C53A5.6) mRNA, complete cds
cbrenneri@@@TRINITY_DN10828_c0_g1_i3.p1	T03F1.1	Ubiquitin-like modifier-activating enzyme 5; E1-like enzyme which activates ufm-1. Required for interaction between ufm-1 and ufc-1; Belongs to the ubiquitin-activating E1 family. UBA5 subfamily	https://smart.embl.de/smart/DDvec.cgi?smart=419:Pfam_ThiF(64|320)+	171968,CCD67786.1,CE13096,NM_058847,NM_058847.7,NP_001370592,NP_491248,NP_491248.1,P91430,Protein T03F1.1 (T03F1.1) mRNA, complete cds,T03F1.1,T03F1.1.1,T03F1.1.2,UBA5_CAEEL,UPI000007852C,Uba-5,Ubiquitin-activating enzyme 5,Ubiquitin-like modifier-activating enzyme 5,WBGene00020184,cel:CELE_T03F1.1,uba-5	MCL	5	Green 2	3	Ubiquitin-like modifier-activating enzyme 5; E1-like enzyme which activates ufm-1. Required for interaction between ufm-1 and ufc-1; Belongs to the ubiquitin-activating E1 family. UBA5 subfamily
cbrenneri@@@TRINITY_DN9193_c0_g1_i1.p1	cul-1	Cullin-1; Probable core component of multiple cullin-RING-based SCF (SKP1-CUL1-F-box) E3 ubiquitin-protein ligase complexes which mediate the ubiquitination and subsequent proteasomal degradation of target proteins. As a scaffold protein may contribute to catalysis through positioning of the substrate and the ubiquitin- conjugating enzyme. Required for developmentally programmed transitions from …	https://smart.embl.de/smart/DDvec.cgi?smart=780:CULLIN(451|599)+Cullin_Nedd8(707|774)+	176466,AAC47120.1,Abnormal cell lineage protein 19,CAA84695.2,CE29089,CUL-1,CUL1_CAEEL,Cel.6661,Cul-1,Cullin 1,Cullin-1,D2045.6,NM_066908,NM_066908.4,NP_499309,NP_499309.1,Protein CUL-1 (cul-1) mRNA, complete cds,Q17389,Q18985,U58083,UPI00001286E5,WBGene00000836,Z35639,cel:CELE_D2045.6,cul-1,lin-19	MCL	5	Green 2	3	Cullin-1; Probable core component of multiple cullin-RING-based SCF (SKP1-CUL1-F-box) E3 ubiquitin-protein ligase complexes which mediate the ubiquitination and subsequent proteasomal degradation of target proteins. As a scaffold protein may contribute to catalysis through positioning of the substrate and the ubiquitin- conjugating enzyme. Required for developmentally programmed transitions from …
cbrenneri@@@TRINITY_DN12191_c0_g1_i1.p1	Y105C5B.15	Acid phosphatase type 7; Purple acid phosphatase; Protein Y105C5B.15 (Y105C5B.15) mRNA, complete cds	https://smart.embl.de/smart/DDvec.cgi?smart=417:SIGNAL(1|19)+Pfam_Pur_ac_phosph_N(22|117)+Pfam_Metallophos(124|324)+Pfam_Metallophos_C(349|411)+	178448,3.1.3.2,Acid phosphatase type 7,CAB60319.1,CE24064,CELE_Y105C5B.15,Cel.11691,NM_070503,NM_070503.6,NP_502904,NP_502904.1,Purple acid phosphatase,Q9U309,Q9U309_CAEEL,UPI0000061225,WBGene00013654,Y105C5B.15,Y105C5B.15a,cel:CELE_Y105C5B.15	MCL	6	Green	2	Acid phosphatase type 7; Purple acid phosphatase; Protein Y105C5B.15 (Y105C5B.15) mRNA, complete cds
cbrenneri@@@TRINITY_DN1599_c0_g1_i2.p1	clec-51	C-type LECtin; Protein CLEC-51 (clec-51) mRNA, complete cds	https://smart.embl.de/smart/DDvec.cgi?smart=308:SIGNAL(1|18)+CLECT(20|148)+CLECT(166|303)+	181854,B0218.6,B0218.6a,C-type LECtin,CCD61388.1,CE06689,CELE_B0218.6,Cel.23561,Clec-51,NM_068968,NM_068968.5,NP_501369,NP_501369.1,Protein CLEC-51 (clec-51) mRNA, complete cds,Q17450,Q17450_CAEEL,UPI0000081D5B,WBGene00015050,cel:CELE_B0218.6,clec-51	MCL	6	Green	2	C-type LECtin; Protein CLEC-51 (clec-51) mRNA, complete cds
cbrenneri@@@TRINITY_DN8650_c0_g1_i1.p1	hex-2	Glyco_hydro_20 domain-containing protein; Hexosaminidase; Protein HEX-2 (hex-2) mRNA, complete cds	https://smart.embl.de/smart/DDvec.cgi?smart=596:TRANS(13|35)+Pfam_Glyco_hydro_20(142|413)+	178951,3.2.1.52,AM748821,C14C11.3,CAO72175.2,CCD64497.1,CE36785,CELE_C14C11.3,Cel.8420,EC 3.2.1.52,FO080537,G5EFL1,G5EFL1_CAEEL,Glyco_hydro_20 domain-containing protein,Hex-2,Hexosaminidase,Hexosaminidase ,NM_072088,NM_072088.4,NP_504489,NP_504489.3,Protein HEX-2 (hex-2) mRNA, complete cds,UPI00003B5C17,WBGene00015767,cel:CELE_C14C11.3,hex-2	MCL	7	Blue	2	Glyco_hydro_20 domain-containing protein; Hexosaminidase; Protein HEX-2 (hex-2) mRNA, complete cds
cbrenneri@@@TRINITY_DN8261_c0_g1_i1.p1	tth-1	Thymosin beta; Plays an important role in the organization of the cytoskeleton by regulating actin polymerization in two ways. Firstly, by binding to and sequestering actin monomers (G actin) inhibits actin polymerization. Secondly, by binding directly filamentous actin (F actin) promotes actin polymerization. Regulates the formation of cortical actin in oocytes conferring them enough rigidity to…	https://smart.embl.de/smart/DDvec.cgi?smart=151:THY(19|49)+THY(51|87)+THY(89|125)+	181097,CCD69031.1,CE27929,Cel.38964,F08F1.8,F08F1.8.1,NM_077029,NM_077029.4,NP_509430,NP_509430.1,O17389,Protein TTH-1 (tth-1) mRNA, complete cds,TYB_CAEEL,Tetrathymosin beta,Thymosin beta,Tth-1,UPI000007DF7C,WBGene00006649,cel:CELE_F08F1.8,tth-1	MCL	7	Blue	2	Thymosin beta; Plays an important role in the organization of the cytoskeleton by regulating actin polymerization in two ways. Firstly, by binding to and sequestering actin monomers (G actin) inhibits actin polymerization. Secondly, by binding directly filamentous actin (F actin) promotes actin polymerization. Regulates the formation of cortical actin in oocytes conferring them enough rigidity to…
cbrenneri@@@TRINITY_DN14546_c0_g1_i1.p1	C34C12.6	Cral-trio domain-containing protein c34c12.6; Protein C34C12.6 (C34C12.6) mRNA, complete cds	https://smart.embl.de/smart/DDvec.cgi?smart=400:SEC14(90|267)+	175452,C34C12.6,CAA87097.2,CE40606,CRAL-TRIO domain-containing protein C34C12.6,Cel.10761,NM_065316,NM_065316.4,NP_497717,NP_497717.2,Protein C34C12.6 (C34C12.6) mRNA, complete cds,Q09270,UPI0000E7F755,WBGene00007925,YQF6_CAEEL,cel:CELE_C34C12.6	MCL	8	Light Sky Blue	2	Cral-trio domain-containing protein c34c12.6; Protein C34C12.6 (C34C12.6) mRNA, complete cds
cbrenneri@@@TRINITY_DN5467_c0_g1_i2.p1	F49E10.2	Uncharacterized protein; Protein F49E10.2, isoform a (F49E10.2) mRNA, complete cds	https://smart.embl.de/smart/DDvec.cgi?smart=842:SIGNAL(1|17)+Pfam_RPE65(34|546)+	180855,CCD71564.1,CCD71565.1,CE07263,CE29384,CELE_F49E10.2,Cel.5568,F49E10.2,F49E10.2a,F49E10.2b,FO081427,H2L060,H2L060_CAEEL,NM_076585,NM_076585.3,NM_076586,NM_076586.4,NP_508986,NP_508986.1,NP_508987,NP_508987.1,Q20599,UPI000007D0EF,UPI000007D415,Uncharacterized protein,WBGene00018640,cel:CELE_F49E10.2	MCL	8	Light Sky Blue	2	Uncharacterized protein; Protein F49E10.2, isoform a (F49E10.2) mRNA, complete cds
cbrenneri@@@TRINITY_DN4449_c0_g2_i1.p1	metl-2	Methyltransferase-like protein; MEthylTransferase Like; Protein Y53F4B.42 (Y53F4B.42) mRNA, complete cds	https://smart.embl.de/smart/DDvec.cgi?smart=311:Pfam_Ubie_methyltran(96|246)+	2.1.1.-,4363033,CAJ58501.1,CE39654,CELE_Y53F4B.42,Cel.34390,MEthylTransferase Like,Methyltransferase-like protein,Metl-2,NM_001047362,NM_001047362.2,NP_001040827,NP_001040827.1,Protein Y53F4B.42 (Y53F4B.42) mRNA, complete cds,Q2MDF2,Q2MDF2_CAEEL,UPI00006839B6,WBGene00044720,Y53F4B.42,cel:CELE_Y53F4B.42,metl-2	MCL	9	Medium Blue	2	Methyltransferase-like protein; MEthylTransferase Like; Protein Y53F4B.42 (Y53F4B.42) mRNA, complete cds
cbrenneri@@@TRINITY_DN13763_c0_g1_i1.p1	ost-1	SPARC; Has a high affinity for collagen. Affects nematode body morphology and mobility. Essential for C.elegans development and muscle function. The cysteine-rich region could have protease inhibitory activity or may provide the framework for a protein binding module. Probable role in skeletal morphogenesis; Belongs to the SPARC family	https://smart.embl.de/smart/DDvec.cgi?smart=264:SIGNAL(1|20)+FOLN(52|75)+KAZAL(75|135)+Pfam_SPARC_Ca_bdg(138|252)+	176931,AAA16827.1,BM-40,Basement-membrane protein 40,C44B12.2,C44B12.2a,C44B12.2b.1,C44B12.2b.2,C44B12.2b.3,CCD67228.1,CE08703,CE48586,Cel.33488,L21758,NM_067638,NM_067638.6,NP_500039,NP_500039.1,ON,Ost-1,Osteonectin,P34714,Protein OST-1 (ost-1) mRNA, complete cds,SPARC,SPRC_CAEEL,Secreted protein acidic and rich in cysteine,UPI0000135E73,UPI0003B0A1B3,WBGene00003893,cel:CELE_C44B12.2,ost-1,sparc	MCL	9	Medium Blue	2	SPARC; Has a high affinity for collagen. Affects nematode body morphology and mobility. Essential for C.elegans development and muscle function. The cysteine-rich region could have protease inhibitory activity or may provide the framework for a protein binding module. Probable role in skeletal morphogenesis; Belongs to the SPARC family
cbrenneri@@@TRINITY_DN7621_c0_g1_i1.p1	snt-1	Synaptotagmin-1; May have a regulatory role in the membrane interactions during trafficking of synaptic vesicles at the active zone of the synapse. It binds acidic phospholipids with a specificity that requires the presence of both an acidic head group and a diacyl backbone (By similarity). Involved in necrotic cell death	https://smart.embl.de/smart/DDvec.cgi?smart=443:TRANS(75|97)+COIL(128|160)+C2(175|277)+C2(308|424)+	174120,AAA28145.1,AJ303369,AJ303370,CAC33880.1,CAC33881.1,CCD62852.1,CCD62853.1,CE02711,CE28229,Cel.18270,F31E8.2,F31E8.2a,F31E8.2b,L15302,NM_001026958,NM_001026958.3,NM_062993,NM_062993.6,NP_001022129,NP_001022129.1,NP_495394,NP_495394.3,P34693,Q95QH7,Q9BI77,Q9BI78,SYT1_CAEEL,Snt-1,Synaptotagmin I,Synaptotagmin-1,UPI0000081407,UPI0000136698,WBGene00004921,cel:CELE_F31E8.2,snt-1	MCL	10	Purple	2	Synaptotagmin-1; May have a regulatory role in the membrane interactions during trafficking of synaptic vesicles at the active zone of the synapse. It binds acidic phospholipids with a specificity that requires the presence of both an acidic head group and a diacyl backbone (By similarity). Involved in necrotic cell death
cbrenneri@@@TRINITY_DN6186_c0_g1_i1.p1	syd-2	Liprin-alpha; May play a role in regulating the structure of the neuronal region, called the active zone, from which synaptic vesicles send neurotransmitter signals across the synapse; Belongs to the liprin family. Liprin-alpha subfamily	https://smart.embl.de/smart/DDvec.cgi?smart=1139:COIL(31|140)+COIL(178|297)+COIL(331|432)+COIL(457|515)+COIL(655|699)+SAM(864|933)+SAM(949|1016)+SAM(1037|1109)+	181255,AAD47840.1,AF170122,CAA90660.1,CE03447,Cel.19549,F59F5.6,LAR-interacting protein alpha,LIPA_CAEEL,Liprin-alpha,NM_077367,NM_077367.6,NP_509768,NP_509768.1,Protein SYD-2 (syd-2) mRNA, complete cds,Q21049,Syd-2,Synapse defective protein 2,UPI0000083656,WBGene00006364,cel:CELE_F59F5.6,syd-2	MCL	10	Purple	2	Liprin-alpha; May play a role in regulating the structure of the neuronal region, called the active zone, from which synaptic vesicles send neurotransmitter signals across the synapse; Belongs to the liprin family. Liprin-alpha subfamily
cbrenneri@@@TRINITY_DN32041_c0_g1_i1.p1	B0416.7	Uncharacterized protein b0416.7; Protein B0416.7, isoform a	https://smart.embl.de/smart/DDvec.cgi?smart=132:SIGNAL(1|17)+Pfam_DUF870(25|129)+	181986,B0416.7,B0416.7a,B0416.7b,CCD61926.1,CCD61927.1,CE02437,CE39552,Cel.33954,NM_001047745,NM_001047745.1,NM_001047746,NM_001047746.3,NP_001041210,NP_001041210.1,NP_001041211,NP_001041211.1,Protein B0416.7, isoform a,Q11074,Q2L6Y1,UPI000013C117,UPI0000684214,Uncharacterized protein,Uncharacterized protein B0416.7,WBGene00015182,YT47_CAEEL,cel:CELE_B0416.7
cbrenneri@@@TRINITY_DN221_c0_g1_i1.p1	C01B10.3	Uncharacterized protein; Protein C01B10.3 (C01B10.3) mRNA, complete cds	http://smart.embl.de/smart/DDt.cgi?smart=402:	177427,C01B10.3,CCD62325.1,CE33355,CELE_C01B10.3,Cel.13628,NM_068619,NM_068619.5,NP_501020,NP_501020.2,Protein C01B10.3 (C01B10.3) mRNA, complete cds,Q17543,Q17543_CAEEL,UPI000000C99A,Uncharacterized protein,WBGene00015278,cel:CELE_C01B10.3
cbrenneri@@@TRINITY_DN18577_c0_g2_i1.p1	C05D2.10	Wd_repeats_region domain-containing protein; Protein C05D2.10, isoform a (C05D2.10) mRNA, complete cds	https://smart.embl.de/smart/DDvec.cgi?smart=486:WD40(129|168)+WD40(171|223)+WD40(269|308)+WD40(311|350)+WD40(354|392)+WD40(396|434)+WD40(436|480)+	175774,C05D2.10,C05D2.10a,C05D2.10a.1,C05D2.10b,CCD63128.1,CCD63129.1,CE26861,CE29560,CELE_C05D2.10,Cel.34185,NM_065803,NM_065803.3,NM_065804,NM_065804.7,NP_001370377,NP_498204,NP_498204.1,NP_498205,NP_498205.1,Q95X41,Q95X42,Q95X42_CAEEL,UPI000005C91E,UPI000005C91F,Uncharacterized protein,WBGene00015470,WD_REPEATS_REGION domain-containing protein,cel:CELE_C05D2.10
cbrenneri@@@TRINITY_DN3364_c0_g1_i1.p1	C13C4.4	Phospholysine phosphohistidine inorganic pyrophosphate phosphatase; Protein C13C4.4 (C13C4.4) mRNA, complete cds	https://smart.embl.de/smart/DDvec.cgi?smart=266:Pfam_Hydrolase_6(10|123)+Pfam_Hydrolase_like(182|255)+	179661,3.1.3.-,3.6.1.1,C13C4.4,CAB07315.1,CE20504,CELE_C13C4.4,EC 3.1.3.-,EC 3.6.1.1,NM_073639,NM_073639.3,NP_506040,NP_506040.1,O01926,O01926_CAEEL,Protein C13C4.4 (C13C4.4) mRNA, complete cds,UPI0000078D45,Uncharacterized protein,WBGene00007548,cel:CELE_C13C4.4
cbrenneri@@@TRINITY_DN4658_c0_g3_i1.p1	C13F10.2	KXDl (KxDL) motif containing homolog; Protein C13F10.2 (C13F10.2) mRNA, complete cds	https://smart.embl.de/smart/DDvec.cgi?smart=140:Pfam_KxDL(39|124)+	182578,C13F10.2,CCD63113.1,CE08144,CELE_C13F10.2,Cel.33041,KXDl (KxDL) motif containing homolog,KxDL domain-containing protein,KxDL motif-containing protein 1,Kxd-1,NM_072430,NM_072430.1,NP_504831,NP_504831.1,O01488,O01488_CAEEL,Protein C13F10.2 (C13F10.2) mRNA, complete cds,UPI00000794EE,WBGene00015742,cel:CELE_C13F10.2,kxd-1
cbrenneri@@@TRINITY_DN322_c0_g1_i1.p1	C33H5.8	RPAP3_C domain-containing protein; Protein C33H5.8 (C33H5.8) mRNA, complete cds	https://smart.embl.de/smart/DDvec.cgi?smart=297:Pfam_RPAP3_C(180|273)+	183187,C33H5.8,CCD66570.1,CE04151,CELE_C33H5.8,Cel.13395,NM_068881,NM_068881.1,NP_501282,NP_501282.1,Protein C33H5.8 (C33H5.8) mRNA, complete cds,Q18405,Q18405_CAEEL,RPAP3_C domain-containing protein,Rpap-3,UPI0000080BE3,Uncharacterized protein,WBGene00016375,cel:CELE_C33H5.8,rpap-3
cbrenneri@@@TRINITY_DN2210_c0_g1_i2.p1	C53B4.4	Uncharacterized protein; Protein C53B4.4, isoform b (C53B4.4) mRNA, complete cds	https://smart.embl.de/smart/DDvec.cgi?smart=1362:TRANS(2|24)+PDZ(340|416)+C1(997|1047)+COIL(1224|1249)+	177716,A5JYS5,C53B4.4,C53B4.4a,C53B4.4b,C53B4.4d,C53B4.4e,CAA92456.3,CAA92457.3,CAH60786.1,CAN86580.3,CE37334,CE43460,CE43464,CE43471,CELE_C53B4.4,Cel.13250,NM_001027922,NM_001027922.3,NM_001129292,NM_001129292.2,NM_069157,NM_069157.3,NM_069158,NM_069158.2,NP_001023093,NP_001023093.1,NP_001122764,NP_001122764.2,NP_001360498,NP_501558,NP_501558.2,NP_501559,NP_501559.2,PDZ Domain containing,Pdzd-8,…
cbrenneri@@@TRINITY_DN15205_c0_g1_i1.p1	F19H8.2	Uncharacterized protein; Protein F19H8.2 (F19H8.2) mRNA, complete cds	https://smart.embl.de/smart/DDvec.cgi?smart=303:SIGNAL(1|20)+	184702,CAB07582.1,CE15871,CELE_F19H8.2,Cel.15348,F19H8.2,NM_064635,NM_064635.4,NP_497036,NP_497036.1,O45378,O45378_CAEEL,Protein F19H8.2 (F19H8.2) mRNA, complete cds,UPI0000075B82,Uncharacterized protein,WBGene00008963,cel:CELE_F19H8.2
cbrenneri@@@TRINITY_DN4962_c0_g2_i1.p1	F29A7.6	M-phase phosphoprotein 6, animal type; Protein F29A7.6 (F29A7.6) mRNA, complete cds; Belongs to the MPP6 family	https://smart.embl.de/smart/DDvec.cgi?smart=189:Pfam_MPP6(10|144)+	173618,AAG50237.1,AF304124,CCD69020.1,CE09777,F29A7.6,M-phase phosphoprotein 6, animal type,NM_061948,NM_061948.3,NP_494349,NP_494349.1,O16207,Protein F29A7.6,Protein F29A7.6 (F29A7.6) mRNA, complete cds,UPI000013AD18,WBGene00017916,YF26_CAEEL,cel:CELE_F29A7.6
cbrenneri@@@TRINITY_DN6881_c0_g1_i1.p1	F32H2.10	Uncharacterized protein; Protein F32H2.10 (F32H2.10) mRNA, complete cds	http://smart.embl.de/smart/DDt.cgi?smart=171:	260106,CAC70089.1,CE28926,CELE_F32H2.10,Cel.18797,F32H2.10,NM_060014,NM_060014.3,NP_492415,NP_492415.1,Protein F32H2.10 (F32H2.10) mRNA, complete cds,Q95QH1,Q95QH1_CAEEL,UPI000007532F,Uncharacterized protein,WBGene00009346,Z81523,cel:CELE_F32H2.10
cbrenneri@@@TRINITY_DN13489_c0_g1_i1.p1	F32H5.4	Mfs domain-containing protein; Protein F32H5.4 (F32H5.4) mRNA, complete cds	https://smart.embl.de/smart/DDvec.cgi?smart=528:TRANS(37|59)+Pfam_MFS_1(105|467)+	185216,CAB04250.1,CE09888,CELE_F32H5.4,Cel.3773,F32H5.4,MFS domain-containing protein,NM_073912,NM_073912.1,NP_001370023,NP_506313,NP_506313.1,P91993,P91993_CAEEL,Protein F32H5.4 (F32H5.4) mRNA, complete cds,UPI00000795D4,Uncharacterized protein,WBGene00009350,cel:CELE_F32H5.4
cbrenneri@@@TRINITY_DN24507_c0_g1_i1.p1	F35A5.2	Uncharacterized protein; Protein F35A5.2 (F35A5.2) mRNA, complete cds	https://smart.embl.de/smart/DDvec.cgi?smart=111:SIGNAL(1|19)+	185247,CCD70478.1,CE04486,CELE_F35A5.2,Cel.1080,F35A5.2,NM_076260,NM_076260.5,NP_508661,NP_508661.1,Protein F35A5.2 (F35A5.2) mRNA, complete cds,Q20006,Q20006_CAEEL,UPI00000819E7,Uncharacterized protein,WBGene00018025,cel:CELE_F35A5.2
cbrenneri@@@TRINITY_DN1083_c0_g1_i1.p1	F40F8.11	DUF1768 domain-containing protein; Protein F40F8.11, isoform a	https://smart.embl.de/smart/DDvec.cgi?smart=472:Pfam_DUF1768(222|428)+	4926894,CAL36504.1,CCE71543.1,CE40359,CE46814,CELE_F40F8.11,Cel.7068,DUF1768 domain-containing protein,F40F8.11,F40F8.11.1,F40F8.11a,F40F8.11a.1,F40F8.11a.2,F40F8.11b.1,F40F8.11b.2,H2L297,NM_001267349,NM_001267349.1,NM_001267350,NM_001267350.1,NP_001254278,NP_001254278.1,NP_001254279,NP_001254279.1,Protein F40F8.11, isoform a,Q0G828,Q0G828_CAEEL,UPI00004B700B,UPI0002380C1E,Uncharacterized protein…
cbrenneri@@@TRINITY_DN87_c0_g1_i2.p1	F40F8.5	Uncharacterized protein; Protein F40F8.5, isoform a (F40F8.5) mRNA, complete cds	https://smart.embl.de/smart/DDvec.cgi?smart=448:SIGNAL(1|18)+	174702,CCE71542.1,CCE71544.1,CCE71545.1,CCE71546.1,CCE71547.1,CCE71548.1,CCE71549.1,CCE71550.1,CCE71551.1,CCE71552.1,CE46572,CE46608,CE46640,CE46650,CE46671,CE46683,CE46740,CE46742,CE46778,CE46804,CELE_F40F8.5,Cel.34802,F40F8.5,F40F8.5a,F40F8.5b,F40F8.5c,F40F8.5d,F40F8.5e,F40F8.5f,F40F8.5g,F40F8.5h,F40F8.5i,F40F8.5j,H2L296,H2L298,H2L299,H2L2A0,H2L2A1,H2L2A2,H2L2A2_CAEEL,H2L2A3,H2L2A4,H2L2A5,H2L2A…
cbrenneri@@@TRINITY_DN7803_c0_g1_i1.p1	F49E7.2	Phosphatidylinositol glycan anchor biosynthesis class x; Protein F49E7.2 (F49E7.2) mRNA, complete cds	https://smart.embl.de/smart/DDvec.cgi?smart=243:TRANS(32|51)+	180462,CCD63169.1,CE10784,CELE_F49E7.2,Cel.943,F49E7.2,NM_075806,NM_075806.3,NP_508207,NP_508207.1,Pigx-1,Protein F49E7.2 (F49E7.2) mRNA, complete cds,Q9GYH8,Q9GYH8_CAEEL,UPI00000812CE,Uncharacterized protein,WBGene00018634,cel:CELE_F49E7.2,pigx-1
cbrenneri@@@TRINITY_DN8316_c0_g1_i1.p1	F56A8.9	Uncharacterized protein; Protein F56A8.9 (F56A8.9) mRNA, complete cds	https://smart.embl.de/smart/DDvec.cgi?smart=233:SIGNAL(1|20)+Pfam_ERK-JNK_inhib(39|233)+	13191724,C0P287,C0P287_CAEEL,CAX51676.1,CE43524,CELE_F56A8.9,Cel.39052,F56A8.9,NM_001268263,NM_001268263.1,NP_001255192,NP_001255192.1,Protein F56A8.9 (F56A8.9) mRNA, complete cds,UPI00019602CE,Uncharacterized protein,WBGene00185001,Z83230,cel:CELE_F56A8.9
cbrenneri@@@TRINITY_DN100_c0_g1_i1.p1	F56F11.4	26S proteasome regulatory subunit T6; Protein F56F11.4, isoform a (F56F11.4) mRNA, complete cds; Belongs to the AAA ATPase family	https://smart.embl.de/smart/DDvec.cgi?smart=432:COIL(50|95)+AAA(208|347)+	175403,26S proteasome regulatory subunit T6,AAA domain-containing protein,CCD72012.1,CCD72013.1,CE28467,CE31008,CELE_F56F11.4,F56F11.4,F56F11.4a,F56F11.4b,NM_171085,NM_171085.3,NM_171086,NM_171086.3,NP_001367906,NP_741098,NP_741098.1,NP_741099,NP_741099.1,Q8MXF1,Q8MXF1_CAEEL,Q9TZ65,UPI000007EB5C,UPI000007EC19,Uncharacterized protein,WBGene00018991,cel:CELE_F56F11.4
cbrenneri@@@TRINITY_DN3384_c0_g1_i1.p1	K01G5.9	Taspase, threonine aspartase, 1; Protein K01G5.9 (K01G5.9) mRNA, complete cds	https://smart.embl.de/smart/DDvec.cgi?smart=331:Pfam_Asparaginase_2(28|279)+	176508,3.4.25.-,CAB07249.2,CE33132,CELE_K01G5.9,Cel.17186,Cel.38962,EC 3.4.25.-,G5EF83,G5EF83_CAEEL,K01G5.9,K01G5.9.1,K01G5.9.2,K01G5.9.3,NM_066976,NM_066976.6,NP_001366921,NP_499377,NP_499377.2,Protein K01G5.9 (K01G5.9) mRNA, complete cds,TASPase homolog,Tasp-1,Taspase, threonine aspartase, 1 ,UPI0000001CC6,Uncharacterized protein,WBGene00010480,cel:CELE_K01G5.9,tasp-1
cbrenneri@@@TRINITY_DN4164_c0_g1_i1.p1	K08F4.3	Translocon-associated protein subunit beta; TRAP proteins are part of a complex whose function is to bind calcium to the ER membrane and thereby regulate the retention of ER resident proteins	https://smart.embl.de/smart/DDvec.cgi?smart=182:Pfam_TRAP_beta(1|181)+	177881,CAA93083.1,CE06151,CELE_K08F4.3,K08F4.3,NM_069442,NM_069442.5,NP_501843,NP_501843.1,Protein K08F4.3 (K08F4.3) mRNA, complete cds,Q21352,Q21352_CAEEL,TRAP-beta,Translocon-associated protein subunit beta,UPI000007681B,WBGene00010678,cel:CELE_K08F4.3
cbrenneri@@@TRINITY_DN18195_c0_g3_i1.p1	M60.4	Uncharacterized protein; Protein M60.4, isoform a	https://smart.embl.de/smart/DDvec.cgi?smart=162:TRANS(40|62)+TRANS(72|94)+TRANS(106|128)+TRANS(133|151)+	187465,CCD69426.1,CCD69427.1,CE02832,CE34063,CELE_M60.4,H2KZR1,H2KZR1_CAEEL,M60.4,M60.4a,M60.4b.1,M60.4b.2,M60.4b.3,NM_001029644,NM_001029644.3,NM_001029645,NM_001029645.3,NP_001024815,NP_001024815.1,NP_001024816,NP_001024816.1,Protein M60.4, isoform a,Q7Z2A6,UPI000017BADA,UPI000019AB35,Uncharacterized protein,WBGene00019780,cel:CELE_M60.4
cbrenneri@@@TRINITY_DN103_c0_g1_i1.p1	R10H10.6	Flavokinase domain-containing protein; Protein R10H10.6 (R10H10.6) mRNA, complete cds	https://smart.embl.de/smart/DDvec.cgi?smart=135:Flavokinase(3|130)+	187789,2.7.1.26,CAA94613.1,CE06297,CELE_R10H10.6,EC 2.7.1.26,Flavokinase domain-containing protein,NM_069521,NM_069521.1,NP_501922,NP_501922.1,Protein R10H10.6 (R10H10.6) mRNA, complete cds,Q21918,Q21918_CAEEL,R10H10.6,Riboflavin kinase ,UPI00000765AA,Uncharacterized protein,WBGene00011224,Z70686,cel:CELE_R10H10.6
cbrenneri@@@TRINITY_DN5611_c0_g1_i1.p1	R12C12.9	Uncharacterized protein; Protein R12C12.9, isoform b (R12C12.9) mRNA, complete cds	https://smart.embl.de/smart/DDvec.cgi?smart=250:TRANS(15|34)+TRANS(81|103)+TRANS(123|145)+TRANS(205|227)+	174009,CCD72329.1,CCD72330.1,CE02854,CE32059,CELE_R12C12.9,Cel.8936,H2L0B6,NM_062802,NM_062802.3,NM_182215,NM_182215.3,NP_495203,NP_495203.1,NP_872015,NP_872015.1,Q21956,Q21956_CAEEL,R12C12.9,R12C12.9a,R12C12.9a.1,R12C12.9a.2,R12C12.9b,UPI0000077DCB,UPI0000085206,Uncharacterized protein,WBGene00020029,cel:CELE_R12C12.9
cbrenneri@@@TRINITY_DN174_c0_g1_i7.p1	R13H4.2	Uncharacterized protein; Protein R13H4.2, isoform e (R13H4.2) mRNA, complete cds	http://smart.embl.de/smart/DDt.cgi?smart=225:	6418761,A5Z2W3,A5Z2W3_CAEEL,CAN99688.1,CCG28258.1,CCO25655.1,CE12802,CE21124,CE48085,CELE_R13H4.2,H9G321,K8ESK7,NM_001129518,NM_001129518.3,NM_001269449,NM_001269449.1,NM_001276935,NM_001276935.1,NP_001122990,NP_001122990.1,NP_001256378,NP_001256378.1,NP_001263864,NP_001263864.1,NR_023977,NR_023977.1,NR_102077,NR_102077.1,R13H4.2,R13H4.2a,R13H4.2b,R13H4.2c,R13H4.2d,R13H4.2e,UPI0000164208,UPI00005…
cbrenneri@@@TRINITY_DN5851_c0_g1_i1.p1	T07D4.5	Uncharacterized protein; Protein T07D4.5 (T07D4.5) mRNA, complete cds	http://smart.embl.de/smart/DDt.cgi?smart=142:	6418633,A5JYR6,A5JYR6_CAEEL,CAN86603.1,CE41015,CELE_T07D4.5,NM_001129162,NM_001129162.3,NP_001122634,NP_001122634.1,Protein T07D4.5 (T07D4.5) mRNA, complete cds,T07D4.5,UPI00015298D5,Uncharacterized protein,WBGene00045407,cel:CELE_T07D4.5
cbrenneri@@@TRINITY_DN9072_c0_g1_i2.p1	T12G3.2	Uncharacterized protein; Protein T12G3.2, isoform a	http://smart.embl.de/smart/DDt.cgi?smart=948:	178140,CAA92981.2,CAE54904.2,CAE54905.2,CBK19474.1,CBK19475.1,CE44548,CE44551,CE44592,CE44654,CE44692,CELE_T12G3.2,Cel.17846,Cel.33631,D3YT30,D3YT30_CAEEL,D3YT31,NM_001028206,NM_001028206.3,NM_001028207,NM_001028207.2,NM_001028208,NM_001028208.5,NM_001268681,NM_001268681.1,NM_001268682,NM_001268682.1,NP_001023377,NP_001023377.2,NP_001023378,NP_001023378.2,NP_001023379,NP_001023379.2,NP_001255610,…
cbrenneri@@@TRINITY_DN25545_c0_g1_i1.p1	T13F2.2	Putative RNA polymerase II transcriptional coactivator; General coactivator that functions cooperatively with TAFs and mediates functional interactions between upstream activators and the general transcriptional machinery. Binds single-stranded DNA (By similarity)	https://smart.embl.de/smart/DDvec.cgi?smart=124:COIL(10|51)+Pfam_PC4(63|116)+	188475,CAB03353.1,CE13621,CELE_T13F2.2,NM_069349,NM_069349.6,NP_501750,NP_501750.1,Protein T13F2.2 (T13F2.2) mRNA, complete cds,Q94045,T13F2.2,T13F2.2.1,TCP4_CAEEL,UPI000007B0E0,WBGene00011743,cel:CELE_T13F2.2
cbrenneri@@@TRINITY_DN3844_c0_g1_i1.p1	T18D3.7	Tsc twenty-two domain containing; Protein T18D3.7, isoform a (T18D3.7) mRNA, complete cds; Belongs to the TSC-22/Dip/Bun family	https://smart.embl.de/smart/DDvec.cgi?smart=269:Pfam_TSC22(210|266)+	188577,CAA92196.2,CCH63818.1,CCH63819.1,CE43264,CE47596,CE47649,Cel.341,I2HAB1,I2HAB2,NM_001270263,NM_001270263.1,NM_001270264,NM_001270264.1,NM_001270265,NM_001270265.1,NP_001257192,NP_001257192.1,NP_001257193,NP_001257193.1,NP_001257194,NP_001257194.1,Q22544,T18D3.7,T18D3.7.2,T18D3.7a,T18D3.7a.1,T18D3.7a.2,T18D3.7b.1,T18D3.7b.2,T18D3.7c,T18D3.7c.1,T18D3.7c.2,TSC Twenty-two domain containing,Tsc…
cbrenneri@@@TRINITY_DN8293_c0_g1_i1.p1	Y105E8A.11	Uncharacterized protein; Protein Y105E8A.11 (Y105E8A.11) mRNA, complete cds; Belongs to the BolA/IbaG family	https://smart.embl.de/smart/DDvec.cgi?smart=106:Pfam_BolA(33|106)+	173306,BolA-like protein 3,CAC48129.1,CE25173,CELE_Y105E8A.11,NM_170943,NM_170943.5,NP_740939,NP_740939.1,Q9NEY7,Q9NEY7_CAEEL,UPI0000061232,Uncharacterized protein,WBGene00013671,Y105E8A.11,cel:CELE_Y105E8A.11
cbrenneri@@@TRINITY_DN2489_c0_g2_i1.p1	Y105E8A.14	E3 ubiquitin-protein ligase RNF146; Protein Y105E8A.14 (Y105E8A.14) mRNA, complete cds	https://smart.embl.de/smart/DDvec.cgi?smart=224:RING(24|63)+WWE(127|203)+	173308,2.3.2.27,CAD21663.2,CE25168,CELE_Y105E8A.14,E3 ubiquitin-protein ligase RNF146 ,EC 2.3.2.27,NM_170947,NM_170947.5,NP_740943,NP_740943.2,Q8WQB0,Q8WQB0_CAEEL,UPI000052B8E0,Uncharacterized protein,WBGene00013674,Y105E8A.14,cel:CELE_Y105E8A.14
cbrenneri@@@TRINITY_DN42_c0_g1_i3.p1	Y39A1A.21	Atp synthase subunit c lysine n-methyltransferase; Protein Y39A1A.21, isoform a (Y39A1A.21) mRNA, complete cds	https://smart.embl.de/smart/DDvec.cgi?smart=188:TRANS(5|27)+	176493,2.1.1.-,ACKMT_CAEEL,AL031633,CAA21030.1,CE19141,CE50211,CELE_Y39A1A.21,NM_001027669,NM_001027669.3,NM_001027669.4,NP_001022840,NP_001022840.1,NP_001022840.2,NP_001369810,NR_002375,NR_002375.1,Q9XX11,Q9XX11_CAEEL,UPI0000082912,Uncharacterized protein,WBGene00012658,Y39A1A.21,Y39A1A.21a,Y39A1A.21b,cel:CELE_Y39A1A.21
cbrenneri@@@TRINITY_DN2599_c0_g1_i1.p1	Y47G6A.33	Uncharacterized protein; Protein Y47G6A.33 (Y47G6A.33) mRNA, complete cds	https://smart.embl.de/smart/DDvec.cgi?smart=112:SIGNAL(1|18)+	6418611,A5A8P5,A5A8P5_CAEEL,CCD72579.1,CE41052,CELE_Y47G6A.33,NM_001129069,NM_001129069.2,NP_001122541,NP_001122541.1,Protein Y47G6A.33 (Y47G6A.33) mRNA, complete cds,UPI000150BB7E,Uncharacterized protein,WBGene00045399,Y47G6A.33,cel:CELE_Y47G6A.33
cbrenneri@@@TRINITY_DN25269_c0_g1_i1.p1	Y53C12A.10	Dtw domain-containing protein; Protein Y53C12A.10 (Y53C12A.10) mRNA, complete cds	https://smart.embl.de/smart/DDvec.cgi?smart=235:DTW(32|220)+	13186571,B7WNB4,B7WNB4_CAEEL,CAT01093.1,CE43314,CELE_Y53C12A.10,DTW domain-containing protein,NM_001267293,NM_001267293.1,NP_001254222,NP_001254222.1,UPI0001890DA3,Uncharacterized protein,WBGene00175030,Y53C12A.10,cel:CELE_Y53C12A.10
cbrenneri@@@TRINITY_DN983_c0_g1_i3.p1	Y74C9A.4	RCOR (REST CO-Repressor) homolog; Protein RCOR-1, isoform a (rcor-1) mRNA, complete cds	https://smart.embl.de/smart/DDvec.cgi?smart=564:ELM2(111|161)+SANT(192|240)+SANT(498|546)+	171592,CCD68264.1,CCD68265.1,CE24662,CE28147,CELE_Y74C9A.4,Cel.16276,H2KZI1,NM_058261,NM_058261.4,NM_058262,NM_058262.4,NP_490662,NP_490662.1,NP_490663,NP_490663.1,Q95Y41,Q95Y41_CAEEL,RCOR (REST CO-Repressor) homolog,Rcor-1,SANT domain-containing protein,UPI00000775F1,UPI000007A022,WBGene00022278,Y74C9A.4,Y74C9A.4a,Y74C9A.4b,cel:CELE_Y74C9A.4,rcor-1
cbrenneri@@@TRINITY_DN11628_c0_g1_i1.p2	ZC262.5	annotation not available	https://smart.embl.de/smart/DDvec.cgi?smart=54:Pfam_ATP-synt_Eps(2|47)+	CCD69197.1,CE00285,P34539,Protein ZC262.5 (ZC262.5) mRNA, complete cds,WBGene00022582,ZC262.5
cbrenneri@@@TRINITY_DN3277_c0_g1_i2.p1	ZC374.2	Uncharacterized protein; Protein ZC374.2 (ZC374.2) mRNA, complete cds	https://smart.embl.de/smart/DDvec.cgi?smart=684:SIGNAL(1|16)+FN3(190|274)+FN3(294|376)+FN3(387|477)+FN3(495|579)+	191148,CAA96700.2,CE42681,CELE_ZC374.2,Cel.28580,NM_077283,NM_077283.2,NP_001361837,NP_509684,NP_509684.2,Protein ZC374.2 (ZC374.2) mRNA, complete cds,Q23266,Q23266_CAEEL,UPI000175729E,Uncharacterized protein,WBGene00013872,Z72518,ZC374.2,cel:CELE_ZC374.2
cbrenneri@@@TRINITY_DN9280_c0_g1_i1.p1	ZC8.6	Phosphatidylinositol 4-kinase type 2; Protein ZC8.6 (ZC8.6) mRNA, complete cds	https://smart.embl.de/smart/DDvec.cgi?smart=593:Pfam_PI3_PI4_kinase(133|481)+	180770,2.7.1.67,CCD73133.1,CE38988,CELE_ZC8.6,Cel.7395,EC 2.7.1.67,NM_076448,NM_076448.5,NP_508849,NP_508849.3,PI3K/PI4K domain-containing protein,Phosphatidylinositol 4-kinase type 2 ,Protein ZC8.6 (ZC8.6) mRNA, complete cds,Q23083,Q23083_CAEEL,UPI0000572594,Uncharacterized protein,WBGene00022501,ZC8.6,cel:CELE_ZC8.6
cbrenneri@@@TRINITY_DN17787_c0_g3_i2.p1	ZK1128.7	Shsp domain-containing protein; Protein ZK1128.7 (ZK1128.7) mRNA, complete cds	https://smart.embl.de/smart/DDvec.cgi?smart=205:Pfam_HSP20(96|187)+	191528,CAA87429.2,CE34516,CELE_ZK1128.7,Cel.9491,G5EF99,G5EF99_CAEEL,NM_066851,NM_066851.2,NP_499252,NP_499252.2,Protein ZK1128.7 (ZK1128.7) mRNA, complete cds,SHSP domain-containing protein,UPI00001B223D,Uncharacterized protein,WBGene00014233,ZK1128.7,cel:CELE_ZK1128.7
cbrenneri@@@TRINITY_DN3859_c0_g1_i1.p1	ZK1236.5	Uncharacterized protein zk1236.5; Protein ZK1236.5 (ZK1236.5) mRNA, complete cds	https://smart.embl.de/smart/DDvec.cgi?smart=148:COIL(74|102)+	191537,CCD66165.1,CE38925,CELE_ZK1236.5,Cel.24888,NM_001038298,NM_001038298.2,NP_001033387,NP_001033387.1,P34621,Protein ZK1236.5 (ZK1236.5) mRNA, complete cds,Q45EM1,Q629J9,UPI0000551C54,Uncharacterized protein,Uncharacterized protein ZK1236.5,WBGene00022864,YO85_CAEEL,ZK1236.5,cel:CELE_ZK1236.5
cbrenneri@@@TRINITY_DN7740_c0_g1_i3.p1	ZK1290.13	Uncharacterized protein; Protein ZK1290.13 (ZK1290.13) mRNA, complete cds	https://smart.embl.de/smart/DDvec.cgi?smart=284:TRANS(30|52)+TRANS(57|79)+TRANS(91|113)+TRANS(158|180)+	259447,CCD65943.1,CE32084,CELE_ZK1290.13,Cel.21910,NM_182214,NM_182214.3,NP_872014,NP_872014.1,Protein ZK1290.13 (ZK1290.13) mRNA, complete cds,Q8I7F2,Q8I7F2_CAEEL,UPI0000085CBB,Uncharacterized protein,WBGene00022893,ZK1290.13,cel:CELE_ZK1290.13
cbrenneri@@@TRINITY_DN8145_c0_g1_i1.p1	ZK546.14	Uncharacterized protein zk546.14; Protein ZK546.14, isoform a	https://smart.embl.de/smart/DDvec.cgi?smart=472:Pfam_SURF6(258|463)+	173854,CCD73224.1,CCD73225.1,CE02914,CE33503,Cel.13774,G8JYE5,NM_062506,NM_062506.4,NM_182183,NM_182183.4,NP_494907,NP_494907.1,NP_871983,NP_871983.1,Protein ZK546.14, isoform a,Q23525,SURF6 domain-containing protein,UPI000000CAF5,UPI000013C206,Uncharacterized protein ZK546.14,WBGene00022765,YWIE_CAEEL,ZK546.14,ZK546.14a,ZK546.14a.1,ZK546.14b.1,ZK546.14b.2,cel:CELE_ZK546.14
cbrenneri@@@TRINITY_DN19724_c0_g1_i1.p1	btb-20	Btb (broad/complex/tramtrack/bric a brac) domain protein; Protein BTB-20 (btb-20) mRNA, complete cds	https://smart.embl.de/smart/DDvec.cgi?smart=300:BTB(142|239)+	186442,BTB domain-containing protein,Btb-20,CAB05523.2,CE28341,CELE_F57C2.1,Cel.32872,F57C2.1,NM_064615,NM_064615.1,NP_497016,NP_497016.1,O45593,O45593_CAEEL,Protein BTB-20 (btb-20) mRNA, complete cds,UPI000008013C,WBGene00010193,btb-20,cel:CELE_F57C2.1
cbrenneri@@@TRINITY_DN9595_c0_g2_i1.p1	ced-9	Apoptosis regulator ced-9; Plays a major role in programmed cell death (PCD, apoptosis). egl-1 binds to and directly inhibits the activity of ced-9, releasing the cell death activator ced-4 from a ced-9/ced-4 containing protein complex and allowing ced-4 to activate the cell-killing caspase ced-3. During larval development, required for the elimination of transient presynaptic components downstre…	https://smart.embl.de/smart/DDvec.cgi?smart=280:BH4(76|102)+BCL(116|221)+TRANS(255|277)+	1OHU,1TY4,2A5Y,3565776,AAA20080.1,Apoptosis regulator ced-9,CAA82573.2,CE25104,CED9_CAEEL,Ced-9,Cel.6305,Cell death protein 9,L26545,NM_066883,NM_066883.5,NP_499284,NP_499284.1,P41958,Protein CED-9 (ced-9) mRNA, complete cds,T07C4.8,T07C4.8.1,UPI00001274CA,WBGene00000423,ced-9,cel:CELE_T07C4.8
cbrenneri@@@TRINITY_DN12162_c0_g1_i1.p1	dnj-22	DNaJ domain (Prokaryotic heat shock protein); Protein DNJ-22 (dnj-22) mRNA, complete cds	https://smart.embl.de/smart/DDvec.cgi?smart=296:DnaJ(7|66)+COIL(124|175)+	179227,CCD72919.1,CE14038,CELE_T23B12.7,Cel.2198,DNaJ domain (Prokaryotic heat shock protein),DnaJ homolog subfamily C member 17,Dnj-22,J domain-containing protein,NM_072777,NM_072777.3,NP_505178,NP_505178.1,O17002,O17002_CAEEL,Protein DNJ-22 (dnj-22) mRNA, complete cds,T23B12.7,UPI0000074819,WBGene00001040,cel:CELE_T23B12.7,dnj-22
cbrenneri@@@TRINITY_DN281_c0_g1_i2.p2	dod-23	Downstream Of DAF-16 (Regulated by DAF-16); Protein DOD-23 (dod-23) mRNA, complete cds	https://smart.embl.de/smart/DDvec.cgi?smart=168:SIGNAL(1|22)+	186056,CAA91387.1,CE03379,CELE_F49E12.2,Dod-23,Downstream Of DAF-16 (Regulated by DAF-16),Downstream Of DAF-16 (regulated by DAF-16),F49E12.2,NM_063366,NM_063366.1,NP_495767,NP_495767.1,Protein DOD-23 (dod-23) mRNA, complete cds,Q20615,Q20615_CAEEL,UPI000008105A,WBGene00009898,cel:CELE_F49E12.2,dod-23
cbrenneri@@@TRINITY_DN1522_c0_g2_i3.p1	ect-2	ECT2 (Mammalian Rho GEF) homolog; Protein ECT-2, isoform b (ect-2) mRNA, complete cds	https://smart.embl.de/smart/DDvec.cgi?smart=932:BRCT(116|190)+BRCT(208|283)+RhoGEF(367|560)+	174658,CAA86788.1,CAB54311.1,CE01671,CE18264,CELE_T19E10.1,Cel.14340,ECT2 (Mammalian Rho GEF) homolog,ECT2 (mammalian Rho GEF) homolog,Ect-2,NM_063917,NM_063917.5,NM_063918,NM_063918.1,NP_496318,NP_496318.1,NP_496319,NP_496319.1,Protein ECT2,Q22590,Q9U364,Q9U364_CAEEL,T19E10.1,T19E10.1a,T19E10.1b,UPI0000079831,UPI000007A29E,WBGene00002297,Z46795,cel:CELE_T19E10.1,ect-2
cbrenneri@@@TRINITY_DN25541_c0_g1_i1.p1	lec-11	Galectin; Protein LEC-11, isoform a	https://smart.embl.de/smart/DDvec.cgi?smart=232:Gal-bind_lectin(16|140)+	177420,AB038502,BAB11967.2,CCD67170.1,CCD67171.1,CE28303,CE33642,CELE_F38A5.3,Cel.19480,F38A5.3,F38A5.3a,F38A5.3b,Galectin,Lec-11,NM_001028020,NM_001028020.4,NM_001028021,NM_001028021.4,NP_001023191,NP_001023191.1,NP_001023192,NP_001023192.1,Protein LEC-11, isoform a,Q86MF7,Q94215,Q94215_CAEEL,Q9GNP8,UPI0000080AF6,UPI0000185C16,WBGene00002274,cel:CELE_F38A5.3,lec-11
cbrenneri@@@TRINITY_DN2413_c0_g1_i2.p1	lin-65	Uncharacterized protein; LIN-65L; Protein LIN-65, isoform b (lin-65) mRNA, complete cds	https://smart.embl.de/smart/DDvec.cgi?smart=728:COIL(228|254)+COIL(340|399)+	171739,AAX35668.1,AAX35669.1,AY818712,AY818713,CCD67964.1,CCD67965.2,CE39067,CE46695,CELE_Y71G12B.9,Cel.16296,LIN-65L,Lin-65,NM_170802,NM_170802.5,NM_170803,NM_170803.4,NP_740785,NP_740785.2,NP_740786,NP_740786.3,Q4VNJ8,Q4VNJ9,Q8IU04,Q95XN0,Q95XN0_CAEEL,UPI000051E16F,UPI0002380CC4,Uncharacterized protein,WBGene00022149,Y71G12B.9,Y71G12B.9a,Y71G12B.9b,cel:CELE_Y71G12B.9,lin-65
cbrenneri@@@TRINITY_DN6346_c0_g2_i2.p1	lsy-22	Uncharacterized protein; Protein LSY-22, isoform b (lsy-22) mRNA, complete cds	https://smart.embl.de/smart/DDvec.cgi?smart=293:COIL(22|64)+	172536,A7LPI4,CAB01968.3,CAO79774.1,CE36140,CE41228,CELE_F27D4.2,Cel.17221,Cel.38882,F27D4.2,F27D4.2a,F27D4.2a.1,F27D4.2a.2,F27D4.2b.1,F27D4.2b.2,Lsy-22,NM_001128989,NM_001128989.2,NM_059746,NM_059746.5,NP_001122461,NP_001122461.1,NP_492147,NP_492147.2,Q93616,Q93616_CAEEL,UPI000021CE7C,UPI0001593354,Uncharacterized protein,WBGene00009188,cel:CELE_F27D4.2,lsy-22
cbrenneri@@@TRINITY_DN1961_c0_g2_i2.p1	nape-2	N-Acyl Phosphatidyl Ethanolamine specific phospholipase D (NAPE-PLD) homolog; Protein NAPE-2, isoform b	https://smart.embl.de/smart/DDvec.cgi?smart=376:Pfam_Lactamase_B_2(121|329)+	177136,3.1.4.54,CCD74039.1,CCD74040.1,CCD74041.1,CE27604,CE28519,CE31637,CELE_Y37E11AR.3,Cel.12101,EC 3.1.4.54,FO081773,Lactamase_B domain-containing protein,NM_068005,NM_068005.3,NM_068006,NM_068006.4,NM_171307,NM_171307.3,NP_001368057,NP_500406,NP_500406.1,NP_500407,NP_500407.1,NP_741361,NP_741361.1,Nape-2,Protein NAPE-2, isoform b,Q8MXT4,Q965X8,Q965X8_CAEEL,Q965X9,UPI0000078D2A,UPI000007DD88,U…
cbrenneri@@@TRINITY_DN624_c0_g1_i2.p1	nova-1	NOVA kh (KH) homology domain homolog; Protein Y59A8B.10, isoform a	https://smart.embl.de/smart/DDvec.cgi?smart=413:KH(40|113)+KH(132|208)+	180183,A0A4V0ILI5,A0A4V0ILI5_CAEEL,CAC14410.1,CBW48583.1,CBW48584.1,CE26206,CE45342,CE45369,CELE_Y59A8B.10,Cel.5684,E0R7K7,E0R7K8,KH domain-containing protein,NM_001269840,NM_001269840.1,NM_001269841,NM_001269841.1,NM_001269842,NM_001269842.1,NOVA kh (KH) homology domain homolog,NP_001256769,NP_001256769.1,NP_001256770,NP_001256770.1,NP_001256771,NP_001256771.1,NP_001360614,Nova-1,Protein Y59A8B.…
cbrenneri@@@TRINITY_DN692_c0_g2_i1.p1	ntl-2	NOT-Like (Yeast CCR4/NOT complex component); Protein NTL-2, isoform a	https://smart.embl.de/smart/DDvec.cgi?smart=444:Pfam_NOT2_3_5(225|350)+	173773,B0286.4,B0286.4a,B0286.4a.1,B0286.4a.2,B0286.4b,B0286.4c.1,B0286.4c.2,B0286.4c.3,B0286.4c.4,B0286.4c.5,B0286.4d.1,B0286.4d.2,B2MZA9,CCD61664.1,CCD61665.1,CCD61666.1,CCD61667.1,CCR4-NOT transcription complex subunit 2,CE03864,CE29537,CE29538,CE39662,CELE_B0286.4,Cel.18294,NM_001047261,NM_001047261.3,NM_062371,NM_062371.4,NM_062372,NM_062372.5,NM_062373,NM_062373.5,NOT-Like (Yeast CCR4/NOT c…
cbrenneri@@@TRINITY_DN11666_c0_g1_i1.p1	pho-11	Putative acid phosphatase 11; Protein PHO-11 (pho-11) mRNA, complete cds	https://smart.embl.de/smart/DDvec.cgi?smart=413:SIGNAL(1|20)+Pfam_His_Phos_2(40|364)+	174547,3.1.3.2,C05C10.4,C05C10.4.1,C05C10.4.2,C05C10.4.3,CAA88205.1,CE17370,Cel.15981,EC 3.1.3.2,Lysosomal acid phosphatase ,NM_063742,NM_063742.6,NP_496143,NP_496143.1,PHO11_CAEEL,Pho-11,Protein PHO-11 (pho-11) mRNA, complete cds,Putative acid phosphatase 11,Q09451,UPI0000131FF4,WBGene00007331,cel:CELE_C05C10.4,pho-11
cbrenneri@@@TRINITY_DN536_c0_g1_i1.p1	pinn-1	Peptidyl-prolyl cis-trans isomerase; Protein PINN-1 (pinn-1) mRNA, complete cds	https://smart.embl.de/smart/DDvec.cgi?smart=161:WW(5|38)+Pfam_Rotamase(54|161)+	190941,5.2.1.8,CCD72986.1,CE45876,CELE_Y110A2AL.13,EC 5.2.1.8,NM_061992,NM_061992.2,NP_494393,NP_494393.2,Peptidyl-prolyl cis-trans isomerase,Pinn-1,Protein PINN-1 (pinn-1) mRNA, complete cds,Q9N492,Q9N492_CAEEL,UPI00020043BC,WBGene00022448,Y110A2AL.13,cel:CELE_Y110A2AL.13,pinn-1
cbrenneri@@@TRINITY_DN2933_c0_g2_i2.p1	ppfr-2	Serine/threonine-protein phosphatase 4 regulatory subunit 2; Protein Phosphatase Four Regulatory subunit; Protein PPFR-2 (ppfr-2) mRNA, complete cds	https://smart.embl.de/smart/DDvec.cgi?smart=378:Pfam_PPP4R2(66|372)+	172381,CCD68493.1,CE09101,CELE_D2092.2,Cel.38985,D2092.2,D2092.2.1,D2092.2.2,NM_059506,NM_059506.4,NP_491907,NP_491907.1,P91198,P91198_CAEEL,Ppfr-2,Protein PPFR-2 (ppfr-2) mRNA, complete cds,Protein Phosphatase Four Regulatory subunit,UPI00000611E6,WBGene00017064,cel:CELE_D2092.2,ppfr-2
cbrenneri@@@TRINITY_DN4343_c0_g1_i2.p1	pxd-1	PleXin Domain containing; Protein PXD-1 (pxd-1) mRNA, complete cds	https://smart.embl.de/smart/DDvec.cgi?smart=498:SIGNAL(1|23)+TRANS(441|463)+	175518,C36E8.3,CAA84646.2,CE30889,CELE_C36E8.3,Cel.17718,NM_065403,NM_065403.5,NP_497804,NP_497804.2,PleXin Domain containing,Protein PXD-1 (pxd-1) mRNA, complete cds,Pxd-1,Q18500,Q18500_CAEEL,UPI000007E447,WBGene00007982,cel:CELE_C36E8.3,pxd-1
cbrenneri@@@TRINITY_DN12469_c0_g1_i1.p1	rnp-8	RNP (RRM RNA binding domain) containing; Protein RNP-8 (rnp-8) mRNA, complete cds	https://smart.embl.de/smart/DDvec.cgi?smart=583:RRM(11|79)+	171627,5JNB,CCD73345.1,CE18161,CELE_R119.7,Cel.140,NM_058323,NM_058323.4,NP_490724,NP_490724.1,O61711,O61711_CAEEL,Protein RNP-8 (rnp-8) mRNA, complete cds,R119.7,R119.7a,RNP (RRM RNA binding domain) containing,RRM domain-containing protein,Rnp-8,UPI00000762E6,WBGene00020091,cel:CELE_R119.7,rnp-8
cbrenneri@@@TRINITY_DN2187_c0_g2_i1.p1	sek-1	Dual specificity mitogen-activated protein kinase kinase sek-1; Dual specificity protein kinase which acts as an essential component of the p38 signal transduction pathway which is also composed of upstream effector nsy-1 and downstream effector pmk-1. May phosphorylate pmk-1. Downstream of CaMKII unc-43 and adapter protein tir-1, plays a role in determining asymmetric cell fates in olfactory AWC…	https://smart.embl.de/smart/DDvec.cgi?smart=336:S_TKc(50|311)+	181043,2.7.12.2,AB024087,AB060731,BAB43977.2,BAC11708.1,CCD68028.1,CE31210,Cel.7756,EC 2.7.12.2,G5EDF7,MAP kinase kinase sek-1,Mitogen-activated protein kinase kinase 6 ,NM_076921,NM_076921.4,NP_509322,NP_509322.2,Protein SEK-1 (sek-1) mRNA, complete cds,R03G5.2,R03G5.2.1,R03G5.2.2,SEK1_CAEEL,Sek-1,UPI00000770C0,WBGene00004758,cel:CELE_R03G5.2,sek-1
cbrenneri@@@TRINITY_DN999_c0_g3_i1.p1	smp-1	Semaphorin-1A; May function in growth cone guidance	https://smart.embl.de/smart/DDvec.cgi?smart=712:SIGNAL(1|19)+Sema(54|480)+PSI(496|547)+TRANS(580|602)+	173351,AAA51021.1,AL032653,CAA21714.1,CAC70145.1,CE19225,CE29065,CeSema,Cel.8033,NM_061181,NM_061181.5,NM_061182,NM_061182.4,NP_493582,NP_493582.3,NP_493583,NP_493583.1,Protein SMP-1, isoform a,Q17330,Q95Q16,Q9XWF8,SEM1A_CAEEL,Semaphorin 6,Semaphorin-1A,Smp-1,U15667,UPI00000828B1,UPI0000135A4C,WBGene00004889,Y54E5B.1,Y54E5B.1a,Y54E5B.1b,Y54E5B.1b.1,cel:CELE_Y54E5B.1,sema-1a,smp-1
cbrenneri@@@TRINITY_DN828_c0_g1_i1.p1	ttr-36	TransThyretin-Related family domain; Protein TTR-36 (ttr-36) mRNA, complete cds	https://smart.embl.de/smart/DDvec.cgi?smart=139:SIGNAL(1|17)+Pfam_TTR-52(26|105)+	3896869,CCD64580.2,CE47093,CELE_F22A3.7,Cel.31734,F22A3.7,FO080548,NM_001038452,NM_001038452.3,NP_001033541,NP_001033541.2,Protein TTR-36 (ttr-36) mRNA, complete cds,Q45EK1,Q45EK1_CAEEL,TransThyretin-Related family domain,Ttr-36,UPI0002530BE5,WBGene00044605,cel:CELE_F22A3.7,ttr-36
cbrenneri@@@TRINITY_DN4048_c0_g1_i1.p1	ttr-59	TransThyretin-Related family domain; Protein TTR-59, isoform b	https://smart.embl.de/smart/DDvec.cgi?smart=144:SIGNAL(1|19)+Pfam_TTR-52(34|110)+	188262,CCD63524.1,CCD63527.1,CE31230,CE41838,CELE_T08A9.11,Cel.20738,H2KYJ2,H2KYJ2_CAEEL,NM_001129708,NM_001129708.2,NM_171722,NM_171722.3,NP_001123180,NP_001123180.1,NP_741833,NP_741833.1,Protein TTR-59, isoform b,Q8MPX6,T08A9.11,T08A9.11a,T08A9.11b,TransThyretin-Related family domain,Ttr-59,UPI000007BDE3,UPI0001611CF8,WBGene00020339,cel:CELE_T08A9.11,ttr-59

## Sheet: Cbrenneri_Enrichment
cluster.number	#category	term ID	term description	observed gene count	background gene count	strength	false discovery rate	matching proteins in your network (IDs)	matching proteins in your network (labels)
6	STRING clusters	6239_CL:22606	Mixed, incl. serine carboxypeptidase, serine active site, and ammonia transport	2	5	3.09	0.004	6239.B0218.6,6239.Y105C5B.15	clec-51,Y105C5B.15
2	GO Process	GO:0016192	Vesicle-mediated transport	6	287	1.06	0.0145	6239.B0303.7a,6239.B0336.2.1,6239.C09G12.9,6239.F59G1.3,6239.T27F7.1.3,6239.Y57G11C.4	B0303.7,arf-1.2,tsg-101,vps-35,T27F7.1,vti-1
2	GO Process	GO:0016197	Endosomal transport	4	58	1.58	0.0145	6239.C09G12.9,6239.F59G1.3,6239.T27F7.1.3,6239.Y57G11C.4	tsg-101,vps-35,T27F7.1,vti-1
2	GO Component	GO:0005768	Endosome	4	112	1.3	0.0285	6239.C09G12.9,6239.F59G1.3,6239.T27F7.1.3,6239.Y57G11C.4	tsg-101,vps-35,T27F7.1,vti-1
2	GO Component	GO:0005770	Late endosome	3	33	1.7	0.0285	6239.F59G1.3,6239.T27F7.1.3,6239.Y57G11C.4	vps-35,T27F7.1,vti-1
2	GO Component	GO:0010008	Endosome membrane	3	52	1.5	0.0343	6239.C09G12.9,6239.T27F7.1.3,6239.Y57G11C.4	tsg-101,T27F7.1,vti-1
2	STRING clusters	6239_CL:13000	ESCRT complex, and Snf7 family	3	25	1.82	0.0493	6239.B0507.2,6239.C09G12.9,6239.T27F7.1.3	B0507.2,tsg-101,T27F7.1
2	KEGG	map04144	Endocytosis	5	90	1.49	4.65e-05	6239.B0336.2.1,6239.C09G12.9,6239.F59G1.3,6239.T05E7.3,6239.T27F7.1.3	arf-1.2,tsg-101,vps-35,T05E7.3,T27F7.1
2	COMPARTMENTS	GOCC:0005768	Endosome	4	78	1.45	0.011	6239.C09G12.9,6239.F59G1.3,6239.T27F7.1.3,6239.Y57G11C.4	tsg-101,vps-35,T27F7.1,vti-1
2	COMPARTMENTS	GOCC:0005770	Late endosome	3	23	1.86	0.011	6239.F59G1.3,6239.T27F7.1.3,6239.Y57G11C.4	vps-35,T27F7.1,vti-1
5	GO Process	GO:0032446	Protein modification by small protein conjugation	3	117	1.72	0.0356	6239.C53A5.6b,6239.D2045.6,6239.T03F1.1.2	C53A5.6,cul-1,T03F1.1
1	GO Process	GO:0019752	Carboxylic acid metabolic process	8	242	1.05	0.001	6239.B0334.3a.1,6239.C31C9.2,6239.C34E10.4b,6239.F22B5.9,6239.K03A1.5,6239.K05F1.3,6239.T05H10.6b,6239.Y105E8A.4	B0334.3,C31C9.2,prx-10,fars-3,sur-5,acdh-8,pdha-1,ech-7
1	GO Process	GO:0006629	Lipid metabolic process	7	257	0.96	0.0066	6239.B0334.3a.1,6239.K03A1.5,6239.K04G2.6,6239.K05F1.3,6239.K06H7.9,6239.Y105E8A.4,6239.ZK370.4b	B0334.3,sur-5,K04G2.6,acdh-8,idi-1,ech-7,ZK370.4
1	GO Process	GO:0032787	Monocarboxylic acid metabolic process	5	106	1.2	0.0123	6239.B0334.3a.1,6239.K03A1.5,6239.K05F1.3,6239.T05H10.6b,6239.Y105E8A.4	B0334.3,sur-5,acdh-8,pdha-1,ech-7
1	GO Process	GO:0044255	Cellular lipid metabolic process	6	214	0.98	0.018	6239.B0334.3a.1,6239.K03A1.5,6239.K04G2.6,6239.K05F1.3,6239.K06H7.9,6239.Y105E8A.4	B0334.3,sur-5,K04G2.6,acdh-8,idi-1,ech-7
1	GO Process	GO:0006631	Fatty acid metabolic process	4	73	1.27	0.0337	6239.B0334.3a.1,6239.K03A1.5,6239.K05F1.3,6239.Y105E8A.4	B0334.3,sur-5,acdh-8,ech-7
1	GO Process	GO:0016042	Lipid catabolic process	4	71	1.28	0.0337	6239.B0334.3a.1,6239.K05F1.3,6239.Y105E8A.4,6239.ZK370.4b	B0334.3,acdh-8,ech-7,ZK370.4
1	GO Process	GO:0019395	Fatty acid oxidation	3	26	1.59	0.0358	6239.B0334.3a.1,6239.K05F1.3,6239.Y105E8A.4	B0334.3,acdh-8,ech-7
1	GO Process	GO:0009062	Fatty acid catabolic process	3	31	1.51	0.0484	6239.B0334.3a.1,6239.K05F1.3,6239.Y105E8A.4	B0334.3,acdh-8,ech-7
1	GO Function	GO:0003824	Catalytic activity	15	2095	0.38	0.0495	6239.B0334.3a.1,6239.C31C9.2,6239.C34E10.4b,6239.F22B5.9,6239.F46E10.1a,6239.H43I07.2,6239.K03A1.5,6239.K05F1.3,6239.K06H7.9,6239.R04B5.5,6239.T05H10.6b,6239.T07A9.5b,6239.W09D10.4,6239.Y105E8A.4,6239.ZK370.4b	B0334.3,C31C9.2,prx-10,fars-3,acs-1,H43I07.2,sur-5,acdh-8,idi-1,R04B5.5,pdha-1,eri-1,W09D10.4,ech-7,ZK370.4
1	KEGG	map00280	Valine, leucine and isoleucine degradation	3	44	1.36	0.0422	6239.K03A1.5,6239.K05F1.3,6239.Y105E8A.4	sur-5,acdh-8,ech-7
10	GO Process	GO:0007626	Locomotory behavior	2	15	2.61	0.035	6239.F31E8.2b,6239.F59F5.6	snt-1,syd-2
10	UniProt Keywords	KW-0770	Synapse	2	23	2.42	0.0063	6239.F31E8.2b,6239.F59F5.6	snt-1,syd-2
3	KEGG	map03430	Mismatch repair	2	15	2.21	0.0096	6239.C29A12.3a,6239.H26D21.2	lig-1,msh-2	KEGG	map03430	Mismatch repair	2	15	2.21	6239.C29A12.3a,6239.H26D21.2	lig-1,msh-2

## Sheet: Cbriggsae
Trinity_name	protein.id	domain_summary_url	annotation	other_names_and_aliases	X.clustering.method	cluster.number	cluster.color	gene.count	protein.description
cbriggsae@@@TRINITY_DN4584_c0_g1_i1.p1	T28D6.6	Obg-type g domain-containing protein; Protein T28D6.6, isoform a (T28D6.6) mRNA, complete cds	https://smart.embl.de/smart/DDvec.cgi?smart=366:Pfam_MMR_HSR1(64|180)+Pfam_MMR_HSR1_Xtn(184|289)+Pfam_TGS(290|364)+	176563,CAB57908.1,CCD31140.1,CE24022,CE46166,CELE_T28D6.6,Cel.9965,G2HK05,G5EGL2,G5EGL2_CAEEL,NM_001268191,NM_001268191.1,NM_001268197,NM_001268197.1,NP_001255120,NP_001255120.1,NP_001255126,NP_001255126.1,OBG-type G domain-containing protein,T28D6.6,T28D6.6a,T28D6.6b,UPI000007A87D,UPI000228F5B5,Uncharacterized protein,WBGene00012126,cel:CELE_T28D6.6	MCL	1	Red	8	Obg-type g domain-containing protein; Protein T28D6.6, isoform a (T28D6.6) mRNA, complete cds
cbriggsae@@@TRINITY_DN25158_c0_g1_i1.p1	Y37E3.8	Ribosomal_L18e/L15P domain-containing protein; Protein Y37E3.8, isoform a (Y37E3.8) mRNA, complete cds; Belongs to the universal ribosomal protein uL15 family	https://smart.embl.de/smart/DDvec.cgi?smart=145:Pfam_Ribosomal_L27A(26|143)+	171767,CCD73428.1,CCD73429.1,CE26774,CE26904,CELE_Y37E3.8,Large subunit ribosomal protein L27Ae,NM_058526,NM_058526.6,NM_058527,NM_058527.4,NP_490927,NP_490927.1,NP_490928,NP_490928.1,Q9BKU5,Q9BKU5_CAEEL,Q9BKU6,Ribosomal_L18e/L15P domain-containing protein,UPI000007CE42,UPI0000082156,Uncharacterized protein,WBGene00021350,Y37E3.8,Y37E3.8a,Y37E3.8a.1,Y37E3.8b.1,Y37E3.8b.2,cel:CELE_Y37E3.8	MCL	1	Red	8	Ribosomal_L18e/L15P domain-containing protein; Protein Y37E3.8, isoform a (Y37E3.8) mRNA, complete cds; Belongs to the universal ribosomal protein uL15 family
cbriggsae@@@TRINITY_DN5350_c0_g1_i1.p1	abcf-3	Atp-binding cassette, subfamily f, member 3; Protein ABCF-3 (abcf-3) mRNA, complete cds	https://smart.embl.de/smart/DDvec.cgi?smart=712:AAA(203|413)+COIL(421|444)+AAA(522|688)+	175873,ABC transporter, class F,ATP-binding cassette, subfamily F, member 3,Abcf-3,CCD65308.1,CE01292,CELE_F42A10.1,Cel.10498,F42A10.1,F42A10.1.1,F42A10.1.2,NM_065938,NM_065938.5,NP_498339,NP_498339.1,Protein ABCF-3 (abcf-3) mRNA, complete cds,Q20306,Q20306_CAEEL,UPI0000083592,WBGene00018339,abcf-3,cel:CELE_F42A10.1	MCL	1	Red	8	Atp-binding cassette, subfamily f, member 3; Protein ABCF-3 (abcf-3) mRNA, complete cds
cbriggsae@@@TRINITY_DN6174_c0_g1_i1.p1	ctps-1	CTP synthase; Catalyzes the ATP-dependent amination of UTP to CTP with either L-glutamine or ammonia as the source of nitrogen	https://smart.embl.de/smart/DDvec.cgi?smart=672:Pfam_CTP_synth_N(8|278)+Pfam_GATase(320|532)+Pfam_GATase(559|606)+	189267,6.3.4.2,AL021572,AL023822,CAA16517.2,CE29830,CELE_W06H3.3,CTP synthase,CTP synthase ,Cel.27968,Ctps-1,EC 6.3.4.2,G5EC98,G5EC98_CAEEL,NM_074842,NM_074842.2,NP_001366646,NP_507243,NP_507243.2,Protein CTPS-1 (ctps-1) mRNA, complete cds,UPI0000081F58,UTP--ammonia ligase,W06H3.3,WBGene00012316,cel:CELE_W06H3.3,ctps-1	MCL	1	Red	8	CTP synthase; Catalyzes the ATP-dependent amination of UTP to CTP with either L-glutamine or ammonia as the source of nitrogen
cbriggsae@@@TRINITY_DN1313_c0_g1_i1.p1	mrpl-19	Probable 39S ribosomal protein L19, mitochondrial; Protein MRPL-19 (mrpl-19) mRNA, complete cds	https://smart.embl.de/smart/DDvec.cgi?smart=288:Pfam_Ribosomal_L19(66|170)+	172052,CCD68301.1,CE27233,Large subunit ribosomal protein L19,Mrpl-19,NM_058980,NM_058980.4,NP_491381,NP_491381.1,Protein MRPL-19 (mrpl-19) mRNA, complete cds,Q95Y83,RM19_CAEEL,UPI00001342DD,WBGene00022470,Y119C1B.4,cel:CELE_Y119C1B.4,mrpl-19	MCL	1	Red	8	Probable 39S ribosomal protein L19, mitochondrial; Protein MRPL-19 (mrpl-19) mRNA, complete cds
cbriggsae@@@TRINITY_DN4649_c0_g1_i1.p1	mrpl-4	Mitochondrial Ribosomal Protein, Large; Protein MRPL-4 (mrpl-4) mRNA, complete cds	https://smart.embl.de/smart/DDvec.cgi?smart=299:Pfam_Ribosomal_L4(67|259)+	179230,CCD72914.1,CE14028,CELE_T23B12.2,Cel.2202,Large subunit ribosomal protein L4,Mitochondrial Ribosomal Protein, Large,Mrpl-4,NM_072780,NM_072780.5,NP_505181,NP_505181.1,O17005,O17005_CAEEL,Protein MRPL-4 (mrpl-4) mRNA, complete cds,T23B12.2,UPI00000826DD,WBGene00020717,cel:CELE_T23B12.2,mrpl-4	MCL	1	Red	8	Mitochondrial Ribosomal Protein, Large; Protein MRPL-4 (mrpl-4) mRNA, complete cds
cbriggsae@@@TRINITY_DN7612_c0_g1_i1.p1	rha-2	Putative ATP-dependent RNA helicase rha-2; Probable ATP-binding RNA helicase	https://smart.embl.de/smart/DDvec.cgi?smart=1148:DEXDc(234|425)+HELICc(559|663)+HA2(723|836)+Pfam_OB_NTP_bind(903|990)+	176207,3.6.4.13,ATP-dependent RNA helicase DHX37/DHR1 ,C06E1.10,CCD62570.1,CE29563,Cel.10874,EC 3.6.4.13,NM_066494,NM_066494.1,NP_498895,NP_498895.1,P34305,Protein RHA-2 (rha-2) mRNA, complete cds,Putative ATP-dependent RNA helicase rha-2,RHA2_CAEEL,Rha-2,UPI000013B741,WBGene00015525,cel:CELE_C06E1.10,rha-2	MCL	1	Red	8	Putative ATP-dependent RNA helicase rha-2; Probable ATP-binding RNA helicase
cbriggsae@@@TRINITY_DN24951_c0_g1_i1.p1	rps-0	Small subunit ribosomal protein sae; 40S ribosomal protein SA; Required for the assembly and/or stability of the 40S ribosomal subunit. Required for the processing of the 20S rRNA- precursor to mature 18S rRNA in a late step of the maturation of 40S ribosomal subunits	https://smart.embl.de/smart/DDvec.cgi?smart=276:Pfam_Ribosomal_S2(18|118)+Pfam_Ribosomal_S2(111|184)+	175628,40S ribosomal protein SA,B0393.1,B0393.1.1,B0393.1.2,CAA86061.1,CE00854,NM_065577,NM_065577.5,NP_497978,NP_497978.1,P46769,Protein RPS-0 (rps-0) mRNA, complete cds,RSSA_CAEEL,Rps-0,Small subunit ribosomal protein SAe,UPI000013520D,WBGene00004469,cel:CELE_B0393.1,rps-0	MCL	1	Red	8	Small subunit ribosomal protein sae; 40S ribosomal protein SA; Required for the assembly and/or stability of the 40S ribosomal subunit. Required for the processing of the 20S rRNA- precursor to mature 18S rRNA in a late step of the maturation of 40S ribosomal subunits
cbriggsae@@@TRINITY_DN4686_c0_g1_i1.p1	fzo-1	Transmembrane GTPase fzo-1; Probable transmembrane GTPase (By similarity). Mediates mitochondrial fusion. Fusion of mitochondria occurs in many cell types and constitutes an important step in mitochondria morphology, which is balanced between fusion and fission (By similarity); Belongs to the TRAFAC class dynamin-like GTPase superfamily. Dynamin/Fzo/YdjA family. Mitofusin subfamily	https://smart.embl.de/smart/DDvec.cgi?smart=774:Pfam_Dynamin_N(103|271)+COIL(385|413)+Pfam_Fzo_mitofusin(606|767)+	173990,3.6.5.-,CCD72511.1,CE02898,Cel.17600,EC 3.6.5.-,FZO1_CAEEL,Fzo-1,Mitofusin 2 ,NM_062760,NM_062760.5,NP_495161,NP_495161.1,Protein FZO-1 (fzo-1) mRNA, complete cds,Q23424,Transmembrane GTPase fzo-1,UPI0000082472,WBGene00001509,ZK1248.14,cel:CELE_ZK1248.14,fzo-1	MCL	2	Brown	7	Transmembrane GTPase fzo-1; Probable transmembrane GTPase (By similarity). Mediates mitochondrial fusion. Fusion of mitochondria occurs in many cell types and constitutes an important step in mitochondria morphology, which is balanced between fusion and fission (By similarity); Belongs to the TRAFAC class dynamin-like GTPase superfamily. Dynamin/Fzo/YdjA family. Mitofusin subfamily
cbriggsae@@@TRINITY_DN21057_c0_g1_i1.p1	pll-1	Inactive phospholipase c-like protein 1; Phosphoinositide phospholipase C; Protein PLL-1, isoform b	https://smart.embl.de/smart/DDvec.cgi?smart=1075:TRANS(13|30)+PH(83|193)+Pfam_EF-hand_like(274|358)+PLCXc(365|516)+PLCYc(565|673)+C2(689|795)+	187273,3.1.4.11,CCD72878.1,CCD72879.1,CE31036,CE31037,CELE_K10F12.3,Cel.10292,Inactive phospholipase C-like protein 1,K10F12.3,K10F12.3a,K10F12.3b,NM_171059,NM_171059.4,NM_171060,NM_171060.3,NP_741067,NP_741067.1,NP_741068,NP_741068.1,Phosphoinositide phospholipase C,Pll-1,Protein PLL-1, isoform b,Q8IA75,Q8IA75_CAEEL,Q8IA76,UPI00000859AB,UPI00000859AC,WBGene00004045,cel:CELE_K10F12.3,pll-1	MCL	2	Brown	7	Inactive phospholipase c-like protein 1; Phosphoinositide phospholipase C; Protein PLL-1, isoform b
cbriggsae@@@TRINITY_DN7467_c0_g1_i1.p1	rab-39	Ras-related protein rab-39b; Protein RAB-39 (rab-39) mRNA, complete cds	https://smart.embl.de/smart/DDvec.cgi?smart=229:RAB(18|186)+	183941,CAA87774.2,CE30340,CELE_D2013.1,D2013.1,NM_063583,NM_063583.2,NP_495984,NP_495984.2,Protein RAB-39 (rab-39) mRNA, complete cds,Q18969,Q18969_CAEEL,RAB family,Rab-39,Ras-related protein Rab-39B,UPI0000076A84,WBGene00004286,cel:CELE_D2013.1,rab-39	MCL	2	Brown	7	Ras-related protein rab-39b; Protein RAB-39 (rab-39) mRNA, complete cds
cbriggsae@@@TRINITY_DN14505_c0_g4_i1.p1	rab-7	Ras-related protein rab-7a; Protein RAB-7 (rab-7) mRNA, complete cds	https://smart.embl.de/smart/DDvec.cgi?smart=209:RAB(10|178)+	174834,AFP33150.1,CAA91357.1,CE03777,CELE_W03C9.3,I7FN66,JQ235186,NM_064148,NM_064148.5,NP_496549,NP_496549.1,Protein RAB-7 (rab-7) mRNA, complete cds,Q23146,Q23146_CAEEL,RAB family,Rab-7,Ras-related protein Rab-7A,UPI000007706B,W03C9.3,W03C9.3.1,W03C9.3.2,WBGene00004271,cel:CELE_W03C9.3,rab-7	MCL	2	Brown	7	Ras-related protein rab-7a; Protein RAB-7 (rab-7) mRNA, complete cds
cbriggsae@@@TRINITY_DN17246_c0_g1_i1.p1	ras-2	Ras-related protein m-ras; GTP binding protein; Protein RAS-2 (ras-2) mRNA, complete cds	https://smart.embl.de/smart/DDvec.cgi?smart=211:RAS(15|182)+	175625,AAB38969.1,CAA84796.1,CE00958,CELE_F17C8.4,Cel.19700,F17C8.4,F17C8.4.1,F17C8.4.2,G5EGA7,G5EGA7_CAEEL,GTP binding protein,NM_065571,NM_065571.5,NP_497972,NP_497972.1,Protein RAS-2 (ras-2) mRNA, complete cds,R-RAS related,Ras-2,Ras-related protein M-Ras,Ras2,U80675,UPI0000082538,WBGene00004311,Z35719,cel:CELE_F17C8.4,ras-2	MCL	2	Brown	7	Ras-related protein m-ras; GTP binding protein; Protein RAS-2 (ras-2) mRNA, complete cds
cbriggsae@@@TRINITY_DN25459_c0_g1_i1.p1	sem-5	Sex muscle abnormal protein 5; Adapter protein which modulates signaling mediated by several receptor tyrosine kinases such as egl-15 and let-23 probably acting upstream of let-60/ras. Negatively regulates vulva induction probably downstream of let-23. Involved in sex myoblast migration. Negatively regulates fluid homeostasis probably downstream of egl-15. During the formation of neuromuscular ju…	https://smart.embl.de/smart/DDvec.cgi?smart=228:SH3(1|57)+SH2(58|142)+SH3(157|212)+	181055,1K76,1KFZ,1SEM,2SEM,3SEM,AAB21850.1,C14F5.5,CCD63850.1,CE01784,Cel.19703,Growth factor receptor-binding protein 2,NM_076941,NM_076941.5,NP_509342,NP_509342.1,P29355,Protein SEM-5 (sem-5) mRNA, complete cds,S88446,SEM5_CAEEL,Sem-5,Sex muscle abnormal protein 5,UPI0000135847,WBGene00004774,cel:CELE_C14F5.5,sem-5	MCL	2	Brown	7	Sex muscle abnormal protein 5; Adapter protein which modulates signaling mediated by several receptor tyrosine kinases such as egl-15 and let-23 probably acting upstream of let-60/ras. Negatively regulates vulva induction probably downstream of let-23. Involved in sex myoblast migration. Negatively regulates fluid homeostasis probably downstream of egl-15. During the formation of neuromuscular ju…
cbriggsae@@@TRINITY_DN2697_c3_g1_i1.p1	sipa-1	SIPA (Vertebrate Signal-Induced Proliferation-Associated) homolog; Protein SIPA-1, isoform a (sipa-1) mRNA, complete cds	https://smart.embl.de/smart/DDvec.cgi?smart=997:Pfam_Rap_GAP(392|574)+PDZ(731|797)+COIL(943|997)+	179596,CAA98554.3,CBM41227.1,CCE71435.1,CCE71436.1,CCE71437.1,CCQ25659.1,CE42943,CE45090,CE46551,CE46626,CE46712,CE48181,CELE_T27F2.2,Cel.2102,Cel.38790,G5EBQ9,G5EBY5,H2L2C1,H2L2C2,H2L2C2_CAEEL,H2L2C3,L8E7Y6,NM_001269414,NM_001269414.1,NM_001269415,NM_001269415.1,NM_001269416,NM_001269416.1,NM_001269417,NM_001269417.1,NM_001269418,NM_001269418.1,NM_001276934,NM_001276934.1,NP_001256343,NP_0012563…	MCL	2	Brown	7	SIPA (Vertebrate Signal-Induced Proliferation-Associated) homolog; Protein SIPA-1, isoform a (sipa-1) mRNA, complete cds
cbriggsae@@@TRINITY_DN297_c1_g3_i1.p1	M03F8.3	Uncharacterized protein; Protein M03F8.3, isoform b (M03F8.3) mRNA, complete cds	https://smart.embl.de/smart/DDvec.cgi?smart=747:HAT(66|98)+HAT(100|132)+HAT(134|166)+HAT(168|199)+HAT(201|233)+HAT(235|270)+HAT(272|306)+HAT(316|348)+HAT(351|388)+HAT(398|434)+HAT(436|467)+HAT(469|501)+HAT(503|537)+HAT(539|570)+COIL(572|602)+	178979,A9D4S6,A9D4S6_CAEEL,CCD64143.1,CCD64146.1,CE28622,CE41919,CELE_M03F8.3,Cel.6588,Crooked neck,M03F8.3,M03F8.3a,M03F8.3b,NM_001129507,NM_001129507.2,NM_072146,NM_072146.4,NP_001122979,NP_001122979.1,NP_504547,NP_504547.1,O16376,UPI000007DFB5,UPI0001627B1F,Uncharacterized protein,WBGene00019762,cel:CELE_M03F8.3	MCL	3	Dark Golden Rod	6	Uncharacterized protein; Protein M03F8.3, isoform b (M03F8.3) mRNA, complete cds
cbriggsae@@@TRINITY_DN16425_c0_g1_i1.p1	baf-1	Barrier-to-autointegration factor 1; DNA-binding protein which plays an essential role in nuclear envelope formation. Required for normal chromosome segregation during mitosis. Associates with the nuclear lamina via its interaction with LEM domain containing proteins emr-1 and lem-2. In association with lem-3, plays a role in radiation-induced DNA damage repair response; Belongs to the BAF family	https://smart.embl.de/smart/DDvec.cgi?smart=89:BAF(1|88)+	176330,AAG50230.1,AF303272,B0464.7,B0464.7.1,BAF1_CAEEL,Baf-1,Barrier-to-autointegration factor,Barrier-to-autointegration factor 1,CAA79543.2,CE26704,Cel.19409,NM_066684,NM_066684.5,NP_001369833,NP_499085,NP_499085.1,Protein BAF-1 (baf-1) mRNA, complete cds,Q03565,Q9BMU1,UPI0000126765,WBGene00000235,baf-1,cel:CELE_B0464.7	MCL	3	Dark Golden Rod	6	Barrier-to-autointegration factor 1; DNA-binding protein which plays an essential role in nuclear envelope formation. Required for normal chromosome segregation during mitosis. Associates with the nuclear lamina via its interaction with LEM domain containing proteins emr-1 and lem-2. In association with lem-3, plays a role in radiation-induced DNA damage repair response; Belongs to the BAF family
cbriggsae@@@TRINITY_DN13596_c0_g2_i1.p1	ddx-23	DEAD boX helicase homolog; Protein DDX-23 (ddx-23) mRNA, complete cds; Belongs to the DEAD box helicase family	https://smart.embl.de/smart/DDvec.cgi?smart=730:COIL(28|67)+COIL(230|266)+DEXDc(320|551)+HELICc(587|668)+	175818,3.6.4.13,ATP-dependent RNA helicase DDX23/PRP28 ,CCD65989.1,CE26887,CELE_F01F1.7,Cel.17362,DEAD boX helicase homolog,Ddx-23,EC 3.6.4.13,F01F1.7,NM_065859,NM_065859.4,NP_498260,NP_498260.2,Protein DDX-23 (ddx-23) mRNA, complete cds,Q95QN2,Q95QN2_CAEEL,UPI0000078936,WBGene00017162,cel:CELE_F01F1.7,ddx-23	MCL	3	Dark Golden Rod	6	DEAD boX helicase homolog; Protein DDX-23 (ddx-23) mRNA, complete cds; Belongs to the DEAD box helicase family
cbriggsae@@@TRINITY_DN6222_c0_g1_i1.p1	emr-1	Emerin homolog 1; Involved in chromosome segregation and cell division, probably via its interaction with lmn-1, the main component of nuclear lamina. Has some overlapping function with lem-2. May play a role in radiation-induced DNA damage repair response	https://smart.embl.de/smart/DDvec.cgi?smart=166:LEM(1|44)+TRANS(126|148)+	171752,CCD67954.1,CE12270,Ce-emerin,EMR1_CAEEL,Emerin homolog 1,Emr-1,M01D7.6,M01D7.6.1,M01D7.6.2,M01D7.6.3,NM_058506,NM_058506.5,NP_490907,NP_490907.1,O01971,Protein EMR-1 (emr-1) mRNA, complete cds,UPI0000077877,WBGene00001309,cel:CELE_M01D7.6,emr-1	MCL	3	Dark Golden Rod	6	Emerin homolog 1; Involved in chromosome segregation and cell division, probably via its interaction with lmn-1, the main component of nuclear lamina. Has some overlapping function with lem-2. May play a role in radiation-induced DNA damage repair response
cbriggsae@@@TRINITY_DN7820_c0_g1_i1.p1	exos-7	EXOSome (Multiexonuclease complex) component; Protein EXOS-7 (exos-7) mRNA, complete cds	https://smart.embl.de/smart/DDvec.cgi?smart=312:Pfam_RNase_PH(30|169)+	180369,CAB07377.2,CE31921,CELE_F31D4.1,EXOSome (Multiexonuclease complex) component,Exos-7,Exosome complex component RRP42,F31D4.1,G5EDS8,G5EDS8_CAEEL,NM_075623,NM_075623.6,NP_001370048,NP_508024,NP_508024.2,Protein EXOS-7 (exos-7) mRNA, complete cds,RNase_PH domain-containing protein,UPI000000CA0E,WBGene00009289,cel:CELE_F31D4.1,exos-7	MCL	3	Dark Golden Rod	6	EXOSome (Multiexonuclease complex) component; Protein EXOS-7 (exos-7) mRNA, complete cds
cbriggsae@@@TRINITY_DN25402_c0_g1_i1.p3	snr-6	Probable small nuclear ribonucleoprotein E; Associated with the spliceosome snRNP U1, U2, U4/U6 and U5	https://smart.embl.de/smart/DDvec.cgi?smart=90:Sm(19|85)+	176668,CAB11551.1,CE22230,Cel.9740,NM_067219,NM_067219.1,NP_499620,NP_499620.1,Probable small nuclear ribonucleoprotein E,Protein SNR-6 (snr-6) mRNA, complete cds,Q9XTU6,RUXE_CAEEL,Sm protein E,Sm-E,SmE,Small nuclear ribonucleoprotein E,Snr-6,UPI0000086639,WBGene00004919,Y49E10.15,cel:CELE_Y49E10.15,snRNP-E,snr-6	MCL	3	Dark Golden Rod	6	Probable small nuclear ribonucleoprotein E; Associated with the spliceosome snRNP U1, U2, U4/U6 and U5
cbriggsae@@@TRINITY_DN23459_c0_g1_i1.p1	ile-2	L-type lectin-like domain-containing protein; Intracellular LEctin; Protein ILE-2 (ile-2) mRNA, complete cds	https://smart.embl.de/smart/DDvec.cgi?smart=347:Pfam_Lectin_leg-like(43|272)+TRANS(313|335)+	180423,CCD62715.1,CE23946,CELE_T04G9.3,Cel.22699,Ile-2,Intracellular LEctin,L-type lectin-like domain-containing protein,Lectin, mannose-binding 2,NM_075750,NM_075750.5,NP_508151,NP_508151.1,Protein ILE-2 (ile-2) mRNA, complete cds,Q22170,Q22170_CAEEL,T04G9.3,UPI0000080326,WBGene00002071,cel:CELE_T04G9.3,ile-2	MCL	4	Yellow	3	L-type lectin-like domain-containing protein; Intracellular LEctin; Protein ILE-2 (ile-2) mRNA, complete cds
cbriggsae@@@TRINITY_DN8905_c0_g1_i1.p1	use-1	Unconventional snare in the endoplasmic reticulum protein 1; Vesicle transport protein USE1; SNARE that may be involved in targeting and fusion of Golgi-derived retrograde transport vesicles with the ER	https://smart.embl.de/smart/DDvec.cgi?smart=254:Pfam_Use1(6|249)+	172140,CCD66202.1,CE34394,NM_059120,NM_059120.6,NP_491521,NP_491521.2,Protein USE-1 (use-1) mRNA, complete cds,Q9N598,UPI00001A9735,USE1-like protein,USE1_CAEEL,Use-1,Vesicle transport protein USE1,WBGene00022460,Y110A7A.11,cel:CELE_Y110A7A.11,use-1	MCL	4	Yellow	3	Unconventional snare in the endoplasmic reticulum protein 1; Vesicle transport protein USE1; SNARE that may be involved in targeting and fusion of Golgi-derived retrograde transport vesicles with the ER
cbriggsae@@@TRINITY_DN4658_c0_g1_i1.p1	ykt-6	YKT6 (Yeast v-SNARE) homolog; Protein YKT-6 (ykt-6) mRNA, complete cds; Belongs to the synaptobrevin family	https://smart.embl.de/smart/DDvec.cgi?smart=201:Longin(45|132)+Pfam_Synaptobrevin(138|199)+	176031,B0361.10,B0361.10.1,B0361.10.2,CCD61825.1,CE20451,CELE_B0361.10,NM_066204,NM_066204.4,NP_001370326,NP_498605,NP_498605.1,Protein YKT-6 (ykt-6) mRNA, complete cds,Q9TXZ9,Q9TXZ9_CAEEL,Synaptobrevin homolog YKT6,UPI0000060E9D,WBGene00015164,YKT6 (Yeast v-SNARE) homolog,YKT6 (yeast V-SNARE) homolog,Ykt-6,cel:CELE_B0361.10,ykt-6	MCL	4	Yellow	3	YKT6 (Yeast v-SNARE) homolog; Protein YKT-6 (ykt-6) mRNA, complete cds; Belongs to the synaptobrevin family
cbriggsae@@@TRINITY_DN3119_c0_g1_i1.p1	Y57G11B.5	Uncharacterized protein; Protein Y57G11B.5 (Y57G11B.5) mRNA, complete cds	https://smart.embl.de/smart/DDvec.cgi?smart=225:SIGNAL(1|16)+	178391,CAB16499.1,CE14924,CELE_Y57G11B.5,NM_070368,NM_070368.3,NP_502769,NP_502769.1,O18224,O18224_CAEEL,Protein Y57G11B.5 (Y57G11B.5) mRNA, complete cds,UPI000007D83F,Uncharacterized protein,WBGene00013297,Y57G11B.5,cel:CELE_Y57G11B.5	MCL	5	Olive	3	Uncharacterized protein; Protein Y57G11B.5 (Y57G11B.5) mRNA, complete cds
cbriggsae@@@TRINITY_DN48_c0_g3_i1.p1	col-140	Col_cuticle_n domain-containing protein; COLlagen; Protein COL-140, isoform a (col-140) mRNA, complete cds	https://smart.embl.de/smart/DDvec.cgi?smart=289:Col_cuticle_N(3|55)+Pfam_Collagen(217|276)+	178971,CCD62675.1,CCD62686.1,CE07146,CE41227,CELE_F26F12.1,COLlagen,Col-140,Col_cuticle_N domain-containing protein,F26F12.1,F26F12.1a,F26F12.1b,H2KYE5,NM_001129460,NM_001129460.3,NM_072124,NM_072124.5,NP_001122932,NP_001122932.1,NP_504525,NP_504525.1,Q19813,Q19813_CAEEL,UPI000007BFFC,UPI0001582CFE,WBGene00000713,cel:CELE_F26F12.1,col-140	MCL	5	Olive	3	Col_cuticle_n domain-containing protein; COLlagen; Protein COL-140, isoform a (col-140) mRNA, complete cds
cbriggsae@@@TRINITY_DN6460_c0_g1_i1.p1	ddo-3	D-aspartate oxidase 3; Selectively catalyzes the oxidative deamination of D- aspartate and its N-methylated derivative, N-methyl D-aspartate. Has no activity towards L-amino acids or N-methyl-L-aspartic acid. May play a role in the egg-laying events and maturation processes of the reproductive organs	https://smart.embl.de/smart/DDvec.cgi?smart=383:SIGNAL(1|17)+Pfam_DAO(19|351)+	1.4.3.1,184746,AB275893,BAF34316.1,CCD69778.1,CE09514,Cel.10588,D-aspartate oxidase ,D-aspartate oxidase 3,DASOX 3,DDO-3,Ddo-3,EC 1.4.3.1,F20H11.5,NM_066052,NM_066052.4,NP_498453,NP_498453.1,O01739,OXDD3_CAEEL,Protein DDO-3 (ddo-3) mRNA, complete cds,Putative D-amino-acid oxidase 1,Q08I98,UPI00000788D5,WBGene00017648,cel:CELE_F20H11.5,ddo-3	MCL	5	Olive	3	D-aspartate oxidase 3; Selectively catalyzes the oxidative deamination of D- aspartate and its N-methylated derivative, N-methyl D-aspartate. Has no activity towards L-amino acids or N-methyl-L-aspartic acid. May play a role in the egg-laying events and maturation processes of the reproductive organs
cbriggsae@@@TRINITY_DN2557_c0_g1_i2.p1	F40G9.17	26S proteasome non-ATPase regulatory subunit 10; Protein F40G9.17 (F40G9.17) mRNA, complete cds	https://smart.embl.de/smart/DDvec.cgi?smart=240:ANK(49|78)+ANK(83|111)+ANK(117|147)+ANK(151|181)+ANK(185|214)+	13188172,26S proteasome non-ATPase regulatory subunit 10,ANK_REP_REGION domain-containing protein,C0Z1Y9,C0Z1Y9_CAEEL,CCD70939.1,CE43599,CELE_F40G9.17,Cel.39819,F40G9.17,NM_001267902,NM_001267902.1,NP_001254831,NP_001254831.1,NP_001367841,Protein F40G9.17 (F40G9.17) mRNA, complete cds,UPI000198932B,Uncharacterized protein,WBGene00185078,cel:CELE_F40G9.17	MCL	6	Light Green	3	26S proteasome non-ATPase regulatory subunit 10; Protein F40G9.17 (F40G9.17) mRNA, complete cds
cbriggsae@@@TRINITY_DN4729_c0_g1_i1.p1	rpn-12	26S proteasome non-ATPase regulatory subunit 8; Acts as a regulatory subunit of the 26S proteasome which is involved in the ATP-dependent degradation of ubiquitinated proteins	https://smart.embl.de/smart/DDvec.cgi?smart=250:Pfam_CSN8_PSD8_EIF3K(87|229)+	174786,26S proteasome non-ATPase regulatory subunit 8,26S proteasome regulatory subunit N12,26S proteasome regulatory subunit rpn-12,CAA93778.1,CE06608,NM_064088,NM_064088.7,NP_496489,NP_496489.1,PSMD8_CAEEL,Protein RPN-12 (rpn-12) mRNA, complete cds,Q23449,Rpn-12,UPI000013278B,WBGene00004468,ZK20.5,ZK20.5.1,ZK20.5.2,cel:CELE_ZK20.5,rpn-12	MCL	6	Light Green	3	26S proteasome non-ATPase regulatory subunit 8; Acts as a regulatory subunit of the 26S proteasome which is involved in the ATP-dependent degradation of ubiquitinated proteins
cbriggsae@@@TRINITY_DN3014_c0_g1_i1.p1	rpt-6	Proteasome Regulatory Particle, ATPase-like; Protein RPT-6 (rpt-6) mRNA, complete cds; Belongs to the AAA ATPase family	https://smart.embl.de/smart/DDvec.cgi?smart=416:COIL(34|81)+AAA(192|331)+	176661,26S proteasome AAA-ATPase subunit rpt-6,26S proteasome regulatory subunit 8,26S proteasome regulatory subunit T6,CAB11558.1,CE22219,CELE_Y49E10.1,NM_067208,NM_067208.4,NP_499609,NP_499609.1,PRS8_CAEEL,Proteasome Regulatory Particle, ATPase-like,Protein RPT-6 (rpt-6) mRNA, complete cds,Q9XTT9,Q9XTT9_CAEEL,Rpt-6,UPI0000077827,WBGene00004506,Y49E10.1,cel:CELE_Y49E10.1,rpt-6	MCL	6	Light Green	3	Proteasome Regulatory Particle, ATPase-like; Protein RPT-6 (rpt-6) mRNA, complete cds; Belongs to the AAA ATPase family
cbriggsae@@@TRINITY_DN20892_c0_g1_i1.p2	M02D8.1	Ig-like domain-containing protein; 2 (Zwei) IG domain protein; Protein M02D8.1 (M02D8.1) mRNA, complete cds	https://smart.embl.de/smart/DDvec.cgi?smart=197:IG(8|196)+	181123,2 (Zwei) IG domain protein,CCD68791.1,CE04757,CELE_M02D8.1,Ig-like domain-containing protein,M02D8.1,NM_077084,NM_077084.4,NP_509485,NP_509485.1,Protein M02D8.1 (M02D8.1) mRNA, complete cds,Q21465,Q21465_CAEEL,UPI0000076E96,WBGene00019727,Zig-12,cel:CELE_M02D8.1,zig-12	MCL	7	Green 2	3	Ig-like domain-containing protein; 2 (Zwei) IG domain protein; Protein M02D8.1 (M02D8.1) mRNA, complete cds
cbriggsae@@@TRINITY_DN4914_c0_g1_i2.p1	nhl-1	Ring finger protein nhl-1; Protein NHL-1 (nhl-1) mRNA, complete cds	https://smart.embl.de/smart/DDvec.cgi?smart=974:RING(43|83)+COIL(158|191)+Pfam_NHL(712|739)+Pfam_NHL(805|832)+Pfam_NHL(852|880)+Pfam_NHL(900|927)+Pfam_NHL(947|974)+	176295,CAA79562.1,CAA80152.1,CE05942,Cel.6381,F54G8.4,F54G8.4a,NHL1_CAEEL,NM_066627,NM_066627.5,NP_499028,NP_499028.1,Protein NHL-1 (nhl-1) mRNA, complete cds,Q03601,Q23510,RING finger protein nhl-1,UPI000013B972,WBGene00003597,nhl-1	MCL	7	Green 2	3	Ring finger protein nhl-1; Protein NHL-1 (nhl-1) mRNA, complete cds
cbriggsae@@@TRINITY_DN419_c0_g1_i2.p1	tep-1	TEP (ThiolEster containing Protein); Protein TEP-1, isoform b	https://smart.embl.de/smart/DDvec.cgi?smart=1516:SIGNAL(1|20)+Pfam_A2M_N(144|236)+A2M_N_2(495|631)+A2M(758|848)+Pfam_Thiol-ester_cl(981|1010)+Pfam_A2M_comp(1030|1271)+A2M_recep(1373|1462)+	173367,CAB05006.1,CAB05007.2,CAD98728.1,CD109 antigen,CE16718,CE34450,CE34451,CELE_ZK337.1,Cel.5385,I39.006,NM_001026696,NM_001026696.3,NM_061212,NM_061212.4,NM_061213,NM_061213.3,NP_001021867,NP_001021867.1,NP_001366904,NP_493613,NP_493613.2,NP_493614,NP_493614.1,O46014,O46015,Protein TEP-1, isoform b,Q7JKM0,Q7YTU0,Q7YTU0_CAEEL,TEP (ThiolEster containing Protein),Tep-1,UPI000002A1DF,UPI00001A9C3…	MCL	7	Green 2	3	TEP (ThiolEster containing Protein); Protein TEP-1, isoform b
cbriggsae@@@TRINITY_DN21606_c0_g1_i1.p1	D1054.8	Uncharacterized protein; Protein D1054.8 (D1054.8) mRNA, complete cds	https://smart.embl.de/smart/DDvec.cgi?smart=278:Pfam_KR(8|196)+	183917,1SPX,CAA98438.1,CE05526,CELE_D1054.8,Cel.4315,D1054.8,NM_073354,NM_073354.4,NP_505755,NP_505755.1,Protein D1054.8 (D1054.8) mRNA, complete cds,Q18946,Q18946_CAEEL,UPI000007E1E1,Uncharacterized protein,WBGene00008375,cel:CELE_D1054.8	MCL	8	Green	2	Uncharacterized protein; Protein D1054.8 (D1054.8) mRNA, complete cds
cbriggsae@@@TRINITY_DN1097_c0_g1_i1.p1	kin-18	Thousand and one amino acid protein kinase; Serine/threonine-protein kinase SULU; Protein KIN-18, isoform a (kin-18) mRNA, complete cds; Belongs to the protein kinase superfamily. Ser/Thr protein kinase family	https://smart.embl.de/smart/DDvec.cgi?smart=982:S_TKc(30|289)+COIL(592|621)+COIL(874|909)+	175862,2.7.11.1,AAA75370.1,CCD63180.1,CCD63181.1,CE01405,CE32936,CHEMBL5197,Cel.18101,EC 2.7.11.1,FO080363,Kin-18,NM_001027596,NM_001027596.2,NM_171151,NM_171151.3,NP_001022767,NP_001022767.1,NP_741172,NP_741172.2,P46549,Protein kinase 18,Q8MPX1,SULU_CAEEL,Serine/threonine-protein kinase SULU,T17E9.1,T17E9.1a,T17E9.1a.1,T17E9.1a.2,T17E9.1b,T17E9.1b.1,T17E9.1b.2,Thousand and one amino acid protein…	MCL	8	Green	2	Thousand and one amino acid protein kinase; Serine/threonine-protein kinase SULU; Protein KIN-18, isoform a (kin-18) mRNA, complete cds; Belongs to the protein kinase superfamily. Ser/Thr protein kinase family
cbriggsae@@@TRINITY_DN25026_c0_g1_i1.p1	acl-11	Lysophosphatidiate acyltransferase; ACyLtransferase-like; Protein ACL-11 (acl-11) mRNA, complete cds	https://smart.embl.de/smart/DDvec.cgi?smart=368:TRANS(20|42)+PlsC(93|217)+Pfam_Acyltransf_C(257|332)+TRANS(347|364)+	185044,2.3.1.51,ACyLtransferase-like,Acl-11,CCD69828.1,CE37364,CELE_F28B3.9,Cel.24997,EC 2.3.1.51,F28B3.9,Lysophosphatidiate acyltransferase ,NM_059078,NM_059078.3,NP_491479,NP_491479.2,PlsC domain-containing protein,Protein ACL-11 (acl-11) mRNA, complete cds,Q95R12,Q95R12_CAEEL,UPI000043A047,WBGene00017888,acl-11,cel:CELE_F28B3.9	MCL	9	Blue	2	Lysophosphatidiate acyltransferase; ACyLtransferase-like; Protein ACL-11 (acl-11) mRNA, complete cds
cbriggsae@@@TRINITY_DN6635_c0_g1_i1.p1	acl-8	Lysocardiolipin and lysophospholipid acyltransferase; ACyLtransferase-like; Protein ACL-8 (acl-8) mRNA, complete cds	https://smart.embl.de/smart/DDvec.cgi?smart=344:TRANS(9|31)+PlsC(79|195)+Pfam_Acyltransf_C(235|313)+	179031,2.3.1.-,2.3.1.51,ACyLtransferase-like,Acl-8,CCD72028.1,CE13269,CELE_T05H4.1,Cel.2465,EC 2.3.1.-,EC 2.3.1.51,NM_072242,NM_072242.1,NP_001348648,NP_504643,NP_504643.1,O16526,O16526_CAEEL,PlsC domain-containing protein,Protein ACL-8 (acl-8) mRNA, complete cds,T05H4.1,UPI000007B9CB,WBGene00020264,acl-8,cel:CELE_T05H4.1	MCL	9	Blue	2	Lysocardiolipin and lysophospholipid acyltransferase; ACyLtransferase-like; Protein ACL-8 (acl-8) mRNA, complete cds
cbriggsae@@@TRINITY_DN543_c0_g1_i2.p1	ZK688.3	Fumarylacetoacetate hydrolase domain-containing protein 1; May have hydrolase activity	https://smart.embl.de/smart/DDvec.cgi?smart=214:Pfam_FAA_hydrolase(13|211)+	176109,3.-.-.-,3.7.1.5,Acylpyruvate hydrolase ,CCD62534.1,CE00461,Cel.9520,EC 3.7.1.5,FAHD1_CAEEL,Fahd-1,NM_066314,NM_066314.5,NP_498715,NP_498715.1,P34673,Protein FAHD-1 (fahd-1) mRNA, complete cds,UPI000013BC11,Uncharacterized protein ZK688.3,WBGene00022798,ZK688.3,ZK688.3.1,ZK688.3.2,cel:CELE_ZK688.3,fahd-1	MCL	10	Light Sky Blue	2	Fumarylacetoacetate hydrolase domain-containing protein 1; May have hydrolase activity
cbriggsae@@@TRINITY_DN21165_c0_g1_i1.p1	sdhb-1	Succinate dehydrogenase [ubiquinone] iron-sulfur subunit, mitochondrial; Iron-sulfur protein (IP) subunit of succinate dehydrogenase (SDH) that is involved in complex II of the mitochondrial electron transport chain and is responsible for transferring electrons from succinate to ubiquinone (coenzyme Q)	https://smart.embl.de/smart/DDvec.cgi?smart=298:Pfam_Fer2_3(55|162)+Pfam_Fer4_8(196|271)+	1.3.5.1,174482,AAB24366.1,AB008569,BAA23717.1,CAA87780.1,CE01579,Cel.19522,EC 1.3.5.1,F42A8.2,F42A8.2.1,F42A8.2.2,Ip,Iron-sulfur subunit of complex II,NM_063591,NM_063591.6,NP_495992,NP_495992.1,O44075,Protein SDHB-1 (sdhb-1) mRNA, complete cds,Q09545,Q26266,S50380,SDHB_CAEEL,Sdhb-1,UPI000012937C,WBGene00006433,cel:CELE_F42A8.2,sdhb-1,tag-55	MCL	10	Light Sky Blue	2	Succinate dehydrogenase [ubiquinone] iron-sulfur subunit, mitochondrial; Iron-sulfur protein (IP) subunit of succinate dehydrogenase (SDH) that is involved in complex II of the mitochondrial electron transport chain and is responsible for transferring electrons from succinate to ubiquinone (coenzyme Q)
cbriggsae@@@TRINITY_DN2026_c0_g1_i1.p1	cyp-31A3	CYtochrome P450 family; Protein CYP-31A3 (cyp-31A3) mRNA, complete cds; Belongs to the cytochrome P450 family	https://smart.embl.de/smart/DDvec.cgi?smart=495:TRANS(2|21)+Pfam_p450(33|486)+	189467,CCD68717.1,CE41715,CELE_Y17G9B.3,CYtochrome P450 family,Cel.36848,Cyp-31A3,Cytochrome P450 family,Cytochrome P450 family 31 subfamily A,NM_068236,NM_068236.2,NP_500637,NP_500637.2,Protein CYP-31A3 (cyp-31A3) mRNA, complete cds,Q9N574,Q9N574_CAEEL,UPI00015E1C80,WBGene00021200,Y17G9B.3,cel:CELE_Y17G9B.3,cyp-31A3,cyp-31a3	MCL	11	Orchid 2	2	CYtochrome P450 family; Protein CYP-31A3 (cyp-31A3) mRNA, complete cds; Belongs to the cytochrome P450 family
cbriggsae@@@TRINITY_DN18972_c0_g1_i1.p1	emb-8	NADPH--cytochrome P450 reductase; Protein EMB-8 (emb-8) mRNA, complete cds; In the C-terminal section; belongs to the flavoprotein pyridine nucleotide cytochrome reductase family	https://smart.embl.de/smart/DDvec.cgi?smart=662:TRANS(5|27)+Pfam_Flavodoxin_1(75|212)+Pfam_FAD_binding_1(265|484)+Pfam_NAD_binding_1(515|626)+	1.6.2.4,175710,CCD72861.1,CE02018,CELE_K10D2.6,CPR,Cel.5243,EC 1.6.2.4,Emb-8,FO081618,K10D2.6,K10D2.6.1,K10D2.6.2,NADPH--cytochrome P450 reductase,NADPH-ferrihemoprotein reductase ,NM_065702,NM_065702.5,NP_498103,NP_498103.1,P450R,Protein EMB-8 (emb-8) mRNA, complete cds,Q09590,Q09590_CAEEL,UPI000007DAB1,WBGene00001262,cel:CELE_K10D2.6,emb-8	MCL	11	Orchid 2	2	NADPH--cytochrome P450 reductase; Protein EMB-8 (emb-8) mRNA, complete cds; In the C-terminal section; belongs to the flavoprotein pyridine nucleotide cytochrome reductase family
cbriggsae@@@TRINITY_DN21078_c0_g1_i1.p1	mcm-5	DNA replication licensing factor mcm-5; Acts as component of the mcm2-7 complex (mcm complex) which is the putative replicative helicase essential for 'once per cell cycle' DNA replication initiation and elongation in eukaryotic cells. The active ATPase sites in the mcm2-7 ring are formed through the interaction surfaces of two neighboring subunits such that a critical structure of a conserved ar…	https://smart.embl.de/smart/DDvec.cgi?smart=759:MCM(133|673)+	175552,3.6.4.12,CAA90765.1,CE03558,Cel.10253,DNA replication licensing factor MCM5 ,DNA replication licensing factor mcm-5,EC 3.6.4.12,MCM5_CAEEL,Mcm-5,NM_065457,NM_065457.4,NP_497858,NP_497858.1,Protein MCM-5 (mcm-5) mRNA, complete cds,Q21902,R10E4.4,R10E4.4.1,R10E4.4.2,UPI0000061104,WBGene00003157,cel:CELE_R10E4.4,mcm-5	MCL	12	Purple	2	DNA replication licensing factor mcm-5; Acts as component of the mcm2-7 complex (mcm complex) which is the putative replicative helicase essential for 'once per cell cycle' DNA replication initiation and elongation in eukaryotic cells. The active ATPase sites in the mcm2-7 ring are formed through the interaction surfaces of two neighboring subunits such that a critical structure of a conserved ar…
cbriggsae@@@TRINITY_DN21938_c0_g1_i1.p1	mdf-2	Mitotic spindle assembly checkpoint protein mad2; MAD (Yeast Mitosis arrest DeFicient) related; Protein MDF-2, isoform b (mdf-2) mRNA, complete cds	https://smart.embl.de/smart/DDvec.cgi?smart=203:Pfam_HORMA(15|191)+	177046,AAF63495.1,AF239999,CCD74132.1,CCD74133.1,CE26559,CE30468,CE48529,CELE_Y69A2AR.30,Cel.33424,HORMA domain-containing protein,MAD (Yeast Mitosis arrest DeFicient) related,MDF-2,Mdf-2,Mitotic spindle assembly checkpoint protein MAD2,NM_001028392,NM_001028392.5,NM_171291,NM_171291.4,NP_001023563,NP_001023563.1,NP_741342,NP_741342.2,Q8T870,Q9NGT3,Q9NGT3_CAEEL,UPI0000080D9E,UPI0000081805,UPI0003…	MCL	12	Purple	2	Mitotic spindle assembly checkpoint protein mad2; MAD (Yeast Mitosis arrest DeFicient) related; Protein MDF-2, isoform b (mdf-2) mRNA, complete cds
cbriggsae@@@TRINITY_DN20856_c0_g1_i1.p1	immt-1	MICOS complex subunit MIC60-1; Sustains mitochondrial morphology probably through maintaining cristae morphology. May act as a component of the MICOS complex, a large protein complex of the mitochondria (By similarity)	https://smart.embl.de/smart/DDvec.cgi?smart=679:Pfam_Mitofilin(37|671)+	180566,CCD63791.1,CE33696,Cel.5772,FO080448,IMMT1_CAEEL,Immt-1,Inner mitochondrial membrane protein 1,MICOS complex subunit MIC60-1,Mitofilin,Mitofilin homolog 1,NM_076074,NM_076074.5,NP_508475,NP_508475.2,Protein IMMT-1 (immt-1) mRNA, complete cds,Q22505,T14G11.3,UPI0000185C0A,WBGene00020511,cel:CELE_T14G11.3,immt-1	MCL	13	Orchid	2	MICOS complex subunit MIC60-1; Sustains mitochondrial morphology probably through maintaining cristae morphology. May act as a component of the MICOS complex, a large protein complex of the mitochondria (By similarity)
cbriggsae@@@TRINITY_DN19601_c0_g1_i1.p1	vha-11	V-type proton ATPase subunit C; Subunit of the peripheral V1 complex of vacuolar ATPase. Subunit C is necessary for the assembly of the catalytic sector of the enzyme and is likely to have a specific function in its catalytic activity. V-ATPase is responsible for acidifying a variety of intracellular compartments in eukaryotic cells. Has roles in embryogenesis and ovulation	https://smart.embl.de/smart/DDvec.cgi?smart=384:Pfam_V-ATPase_C(9|373)+	177017,AB009567,BAA75067.1,CCD66967.1,CCD66968.1,CE29997,CE38743,Cel.19588,NM_001028280,NM_001028280.3,NM_001028281,NM_001028281.3,NP_001023451,NP_001023451.1,NP_001023452,NP_001023452.1,Q869J4,Q9N421,Q9XXU9,UPI0000138173,UPI000051D051,V-ATPase subunit C,V-type H+-transporting ATPase subunit C,V-type proton ATPase subunit C,VATC_CAEEL,Vacuolar proton pump subunit C,Vha-11,WBGene00006920,Y38F2AL.3…	MCL	13	Orchid	2	V-type proton ATPase subunit C; Subunit of the peripheral V1 complex of vacuolar ATPase. Subunit C is necessary for the assembly of the catalytic sector of the enzyme and is likely to have a specific function in its catalytic activity. V-ATPase is responsible for acidifying a variety of intracellular compartments in eukaryotic cells. Has roles in embryogenesis and ovulation
cbriggsae@@@TRINITY_DN3081_c0_g2_i1.p1	Y57G11C.43	Uncharacterized protein; Protein Y57G11C.43 (Y57G11C.43) mRNA, complete cds	https://smart.embl.de/smart/DDvec.cgi?smart=302:Pfam_AAA_33(3|141)+	3565931,CAE18026.1,CE35120,CELE_Y57G11C.43,Cel.31085,NM_001028356,NM_001028356.3,NP_001023527,NP_001023527.1,Protein KTI12,Q7YTI4,Q7YTI4_CAEEL,UPI00001B4C94,Uncharacterized protein,WBGene00013332,Y57G11C.43,cel:CELE_Y57G11C.43	MCL	14	Pink	2	Uncharacterized protein; Protein Y57G11C.43 (Y57G11C.43) mRNA, complete cds
cbriggsae@@@TRINITY_DN566_c0_g1_i5.p1	sars-2	Aa_trna_ligase_ii domain-containing protein; Seryl Amino-acyl tRNA Synthetase; Protein SARS-2 (sars-2) mRNA, complete cds	https://smart.embl.de/smart/DDvec.cgi?smart=441:Pfam_tRNA-synt_2b(226|407)+	177200,6.1.1.11,AA_TRNA_LIGASE_II domain-containing protein,AB016796,BAA74732.1,CCD71908.1,CE25136,CE49067,CELE_W03B1.4,Cel.19595,EC 6.1.1.11,G5EF77,G5EF77_CAEEL,NM_068148,NM_068148.6,NP_500549,NP_500549.1,Protein SARS-2 (sars-2) mRNA, complete cds,Sars-2,SerRS,Seryl Amino-acyl tRNA Synthetase,Seryl-tRNA synthetase,Seryl-tRNA synthetase ,UPI00000756E3,UPI0003B0EE94,W03B1.4,W03B1.4a,W03B1.4b,WBGen…	MCL	14	Pink	2	Aa_trna_ligase_ii domain-containing protein; Seryl Amino-acyl tRNA Synthetase; Protein SARS-2 (sars-2) mRNA, complete cds
cbriggsae@@@TRINITY_DN10811_c0_g1_i1.p1	C01A2.2	Uncharacterized protein; Protein C01A2.2, isoform b (C01A2.2) mRNA, complete cds	https://smart.embl.de/smart/DDvec.cgi?smart=220:TRANS(62|84)+TRANS(99|121)+TRANS(133|155)+TRANS(170|192)+	173208,B3WFW7,C01A2.2,C01A2.2a,C01A2.2b,CAB02696.1,CAQ76454.1,CE07784,CE42735,CELE_C01A2.2,Cel.19281,NM_001136276,NM_001136276.1,NM_060957,NM_060957.1,NP_001129748,NP_001129748.1,NP_493358,NP_493358.1,Q9XVT7,Q9XVT7_CAEEL,UPI000007FF1D,UPI000178CE0C,Uncharacterized protein,WBGene00007214,cel:CELE_C01A2.2
cbriggsae@@@TRINITY_DN3552_c0_g1_i1.p1	C01A2.4	Charged multivesicular body protein 2b; Protein C01A2.4 (C01A2.4) mRNA, complete cds; Belongs to the SNF7 family	https://smart.embl.de/smart/DDvec.cgi?smart=207:Pfam_Snf7(15|188)+	182050,C01A2.4,CAB02699.2,CE34247,CELE_C01A2.4,Cel.23577,Charged multivesicular body protein 2B,NM_060956,NM_060956.4,NP_001369988,NP_493357,NP_493357.2,O02208,O02208_CAEEL,Protein C01A2.4 (C01A2.4) mRNA, complete cds,UPI00001A9C2A,Uncharacterized protein,WBGene00007216,Z81029,cel:CELE_C01A2.4
cbriggsae@@@TRINITY_DN615_c0_g1_i2.p1	C07A12.7	Uncharacterized protein; Protein C07A12.7, isoform a	https://smart.embl.de/smart/DDvec.cgi?smart=437:VHS(39|176)+Pfam_GAT(262|338)+COIL(415|437)+	180723,C07A12.7,C07A12.7a,C07A12.7a.1,C07A12.7a.2,C07A12.7b.1,C07A12.7b.2,C07A12.7c,CCD63280.1,CCD63281.1,CCD63282.1,CE25764,CE27055,CE33557,CELE_C07A12.7,Cel.11440,GAT domain-containing protein,H2KYH5,NM_001029198,NM_001029198.3,NM_076375,NM_076375.3,NM_076376,NM_076376.4,NP_001024369,NP_001024369.1,NP_508776,NP_508776.1,NP_508777,NP_508777.1,Protein C07A12.7, isoform a,Q86GT7,Q95QX5,Q95QX5_CAEE…
cbriggsae@@@TRINITY_DN5860_c0_g1_i1.p1	C13F10.5	Saysvfn domain-containing protein; Protein C13F10.5 (C13F10.5) mRNA, complete cds	https://smart.embl.de/smart/DDvec.cgi?smart=144:COIL(5|28)+Pfam_SAYSvFN(72|139)+	179110,C13F10.5,CCD63115.1,CE27682,CELE_C13F10.5,Cel.4791,NM_072428,NM_072428.3,NP_504829,NP_504829.1,O01486,O01486_CAEEL,Protein C13F10.5 (C13F10.5) mRNA, complete cds,SAYSvFN domain-containing protein,UPI000007DFBB,Uncharacterized protein,WBGene00015744,cel:CELE_C13F10.5
cbriggsae@@@TRINITY_DN2724_c0_g1_i3.p1	C14H10.2	Uncharacterized protein; Protein C14H10.2, isoform a	https://smart.embl.de/smart/DDvec.cgi?smart=746:COIL(78|163)+Pfam_JAKMIP_CC3(203|396)+COIL(506|607)+	181234,A0A4V0IJY6,A0A4V0IJY6_CAEEL,C14H10.2,C14H10.2a,C14H10.2b.1,C14H10.2b.2,C14H10.2d,CAA90738.2,CAL36493.1,CE23543,CE40377,CELE_C14H10.2,Cel.5018,G5EDI1,G5EDI1_CAEEL,JAKMIP_CC3 domain-containing protein,NM_001083284,NM_001083284.1,NM_001083285,NM_001083285.2,NP_001076753,NP_001076753.1,NP_001076754,NP_001076754.1,Protein C14H10.2, isoform a,Q0G832,UPI0000081110,UPI0000DD0836,Uncharacterized pr…
cbriggsae@@@TRINITY_DN16915_c0_g1_i1.p1	C27B7.5	Cchc-type domain-containing protein; Protein C27B7.5 (C27B7.5) mRNA, complete cds	https://smart.embl.de/smart/DDvec.cgi?smart=386:ZnF_C2HC(169|185)+	177707,C27B7.5,CAA90980.1,CCHC-type domain-containing protein,CE03034,CELE_C27B7.5,Cel.13465,NM_069145,NM_069145.4,NP_501546,NP_501546.1,Protein C27B7.5 (C27B7.5) mRNA, complete cds,Q18244,Q18244_CAEEL,UPI0000079C7E,Uncharacterized protein,WBGene00007762,cel:CELE_C27B7.5
cbriggsae@@@TRINITY_DN23040_c0_g1_i1.p1	F13C5.2	Bromo domain-containing protein; Protein F13C5.2 (F13C5.2) mRNA, complete cds	https://smart.embl.de/smart/DDvec.cgi?smart=374:BROMO(115|224)+COIL(236|266)+	180410,Bromo domain-containing protein,CCD69431.1,CE19384,CELE_F13C5.2,Cel.33414,Cel.6728,F13C5.2,NM_075723,NM_075723.4,NP_508124,NP_508124.1,O76561,O76561_CAEEL,Protein F13C5.2 (F13C5.2) mRNA, complete cds,UPI0000076583,Uncharacterized protein,WBGene00017423,cel:CELE_F13C5.2
cbriggsae@@@TRINITY_DN3849_c0_g1_i1.p1	F15E11.12	Protein up-regulated in daf-2(gf); Protein PUD-4 (pud-4) mRNA, complete cds	http://smart.embl.de/smart/DDt.cgi?smart=162:	178712,CCU83358.1,CCU83359.1,CE25859,CE48210,CELE_F15E11.12,Cel.4070,F15E11.12,F15E11.12a,F15E11.12b,M1ZJ62,M1ZJ62_CAEEL,M1ZMJ3,NM_001307816.1,NM_071238,NM_071238.4,NP_001294745,NP_001294745.1,NP_503639,NP_503639.2,PUD1_2 domain-containing protein,Protein PUD-4 (pud-4) mRNA, complete cds,Protein Up-regulated in Daf-2(Gf),Pud-4,UPI000007D9A5,UPI0002C0B7EF,WBGene00017498,cel:CELE_F15E11.12,pud-4
cbriggsae@@@TRINITY_DN22934_c0_g1_i1.p1	F20G2.3	Cral-trio domain-containing protein; Protein F20G2.3, isoform a	https://smart.embl.de/smart/DDvec.cgi?smart=377:SEC14(72|243)+	179870,B5BM31,CAB02088.1,CAR31483.1,CE09506,CE42946,CELE_F20G2.3,CRAL-TRIO domain-containing protein,Cel.3977,F20G2.3,F20G2.3a,F20G2.3b,NM_001136421,NM_001136421.2,NM_074007,NM_074007.6,NP_001129893,NP_001129893.1,NP_506408,NP_506408.1,Protein F20G2.3, isoform a,Q93546,Q93546_CAEEL,UPI0000081168,UPI00017B0801,Uncharacterized protein,WBGene00008987,Z79753,cel:CELE_F20G2.3
cbriggsae@@@TRINITY_DN5401_c0_g2_i1.p1	F31C3.2	Pap-associated domain-containing protein; Protein F31C3.2, isoform a (F31C3.2) mRNA, complete cds	https://smart.embl.de/smart/DDvec.cgi?smart=808:Pfam_PAP_assoc(710|764)+	173373,CAB07197.1,CAE54895.1,CE17731,CE36143,CELE_F31C3.2,Cel.7025,F31C3.2,F31C3.2a,F31C3.2b,G5EFM8,G5EFR3,G5EFR3_CAEEL,NM_001026262,NM_001026262.5,NM_001026263,NM_001026263.2,NP_001021433,NP_001021433.1,NP_001021434,NP_001021434.1,PAP-associated domain-containing protein,UPI000007A601,UPI000021CE7E,Uncharacterized protein,WBGene00009284,cel:CELE_F31C3.2
cbriggsae@@@TRINITY_DN17118_c0_g1_i1.p1	F40G9.5	Uncharacterized protein; Protein F40G9.5 (F40G9.5) mRNA, complete cds	https://smart.embl.de/smart/DDvec.cgi?smart=271:TRANS(4|26)+	185554,C0Z1Y6,C0Z1Y6_CAEEL,CCD70938.1,CE42113,CELE_F40G9.5,Cel.26766,F40G9.5,NM_064770,NM_064770.4,NP_497171,NP_497171.2,Protein F40G9.5 (F40G9.5) mRNA, complete cds,UPI0001721BF1,Uncharacterized protein,WBGene00018241,cel:CELE_F40G9.5
cbriggsae@@@TRINITY_DN3468_c0_g1_i1.p1	F41E6.12	Uncharacterized protein; Protein F41E6.12 (F41E6.12) mRNA, complete cds	https://smart.embl.de/smart/DDvec.cgi?smart=304:SIGNAL(1|19)+	185621,CCD64089.1,CE37770,CELE_F41E6.12,Cel.23734,F41E6.12,NM_072825,NM_072825.5,NP_505226,NP_505226.2,O16465,O16465_CAEEL,Protein F41E6.12 (F41E6.12) mRNA, complete cds,UPI0000469224,Uncharacterized protein,WBGene00018293,cel:CELE_F41E6.12
cbriggsae@@@TRINITY_DN17033_c0_g1_i1.p1	F42A10.6	Uncharacterized protein; Protein F42A10.6 (F42A10.6) mRNA, complete cds	https://smart.embl.de/smart/DDvec.cgi?smart=176:SIGNAL(1|17)+	175874,CCD65316.1,CE01297,CELE_F42A10.6,F42A10.6,NM_065939,NM_065939.6,NP_498340,NP_498340.1,Protein F42A10.6 (F42A10.6) mRNA, complete cds,Q20311,Q20311_CAEEL,UPI000007B8C4,Uncharacterized protein,WBGene00018342,cel:CELE_F42A10.6
cbriggsae@@@TRINITY_DN5344_c0_g1_i1.p1	K01F9.2	Uncharacterized protein; Protein K01F9.2 (K01F9.2) mRNA, complete cds	http://smart.embl.de/smart/DDt.cgi?smart=259:	3565085,CAE17902.2,CE43490,CELE_K01F9.2,Cel.31318,K01F9.2,NM_001027479,NM_001027479.2,NP_001022650,NP_001022650.2,Protein K01F9.2 (K01F9.2) mRNA, complete cds,Q7YTL1,Q7YTL1_CAEEL,UPI0001960264,Uncharacterized protein,WBGene00010475,Z22175,cel:CELE_K01F9.2
cbriggsae@@@TRINITY_DN707_c0_g1_i2.p1	K03E5.2	Uncharacterized protein; Protein K03E5.2, isoform a	https://smart.embl.de/smart/DDvec.cgi?smart=202:Pfam_Calponin(50|71)+Pfam_Calponin(98|121)+Pfam_Calponin(147|171)+	186951,CCD70000.1,CCD70001.1,CCD70002.1,CCD70004.1,CE37532,CE37655,CE39582,CE43618,CELE_K03E5.2,CaLponIn-liKe proteins,Clik-3,FO081221,H2KZW0,H2KZW1,K03E5.2,K03E5.2a,K03E5.2b,K03E5.2c.1,K03E5.2c.2,K03E5.2d,NM_001026364,NM_001026364.4,NM_001026365,NM_001026365.3,NM_001047209,NM_001047209.3,NM_001262437,NM_001262437.1,NP_001021535,NP_001021535.1,NP_001021536,NP_001021536.1,NP_001040674,NP_001040674…
cbriggsae@@@TRINITY_DN4091_c0_g1_i2.p2	K11D2.5	Mterf domain-containing protein, mitochondrial; Protein K11D2.5 (K11D2.5) mRNA, complete cds	https://smart.embl.de/smart/DDvec.cgi?smart=348:Pfam_mTERF(65|285)+	3565891,CAE17889.2,CE45044,CELE_K11D2.5,Cel.31077,K11D2.5,MTERF domain-containing protein, mitochondrial,NM_001026397,NM_001026397.2,NP_001021568,NP_001021568.2,Protein K11D2.5 (K11D2.5) mRNA, complete cds,Q7YTL5,Q7YTL5_CAEEL,UPI0001D99D78,Uncharacterized protein,WBGene00010771,cel:CELE_K11D2.5
cbriggsae@@@TRINITY_DN17607_c0_g1_i1.p1	K11H12.7	Uncharacterized protein; Protein K11H12.7 (K11H12.7) mRNA, complete cds	https://smart.embl.de/smart/DDvec.cgi?smart=127:SIGNAL(1|16)+	176893,CCD70976.1,CE12158,CELE_K11H12.7,K11H12.7,NM_067565,NM_067565.4,NP_499966,NP_499966.1,P91372,P91372_CAEEL,Protein K11H12.7 (K11H12.7) mRNA, complete cds,UPI00000789A8,Uncharacterized protein,WBGene00019663,cel:CELE_K11H12.7
cbriggsae@@@TRINITY_DN17495_c0_g1_i1.p1	R04B3.2	Putative N(4)-(beta-N-acetylglucosaminyl)-L-asparaginase; Cleaves the GlcNAc-Asn bond which joins oligosaccharides to the peptide of asparagine-linked glycoproteins	https://smart.embl.de/smart/DDvec.cgi?smart=363:SIGNAL(1|16)+Pfam_Asparaginase_2(24|342)+	180550,3.5.1.26,AGA,ASPG_CAEEL,Aspartylglucosaminidase,CCD72284.1,CE28745,EC 3.5.1.26,FO081538,Glycosylasparaginase,Glycosylasparaginase alpha chain,Glycosylasparaginase beta chain,N4-(beta-N-acetylglucosaminyl)-L-asparaginase ,NM_076047,NM_076047.4,NP_508448,NP_508448.1,Protein R04B3.2 (R04B3.2) mRNA, complete cds,Q21697,R04B3.2,T02.001,UPI0000126144,WBGene00019867,cel:CELE_R04B3.2
cbriggsae@@@TRINITY_DN1225_c0_g1_i1.p1	T07E3.3	Uncharacterized protein; Protein T07E3.3 (T07E3.3) mRNA, complete cds	http://smart.embl.de/smart/DDt.cgi?smart=258:	188233,CCD72022.1,CE40210,CELE_T07E3.3,NM_066102,NM_066102.2,NP_498503,NP_498503.2,Protein T07E3.3 (T07E3.3) mRNA, complete cds,Q22312,Q22312_CAEEL,T07E3.3,UPI0000D5BD6C,Uncharacterized protein,WBGene00020314,cel:CELE_T07E3.3
cbriggsae@@@TRINITY_DN6714_c0_g1_i1.p1	T14G8.3	Uncharacterized protein; Protein T14G8.3, isoform a (T14G8.3) mRNA, complete cds; Belongs to the heat shock protein 70 family	https://smart.embl.de/smart/DDvec.cgi?smart=921:SIGNAL(1|24)+Pfam_MreB_Mbl(134|243)+COIL(822|878)+	181422,CAA91809.2,CAH60753.1,CE37407,CE37408,CELE_T14G8.3,Cel.22995,Hypoxia up-regulated 1,NM_001029742,NM_001029742.4,NM_001029743,NM_001029743.3,NP_001024913,NP_001024913.1,NP_001024914,NP_001024914.1,Q22515,Q22515_CAEEL,Q5WRQ0,T14G8.3,T14G8.3a,T14G8.3b,UPI000044F5CA,UPI000044F5CB,Uncharacterized protein,WBGene00011771,Z67884,cel:CELE_T14G8.3
cbriggsae@@@TRINITY_DN9309_c0_g1_i1.p1	T19C3.3	Uncharacterized protein t19c3.3; Protein T19C3.3 (T19C3.3) mRNA, complete cds	http://smart.embl.de/smart/DDt.cgi?smart=92:	188586,CCD73735.1,CE30183,Cel.25325,NM_064818,NM_064818.4,NP_497219,NP_497219.2,Protein T19C3.3 (T19C3.3) mRNA, complete cds,Q10009,T19C3.3,UPI000013C0DB,Uncharacterized protein,Uncharacterized protein T19C3.3,WBGene00020561,YSV3_CAEEL,cel:CELE_T19C3.3
cbriggsae@@@TRINITY_DN14207_c0_g1_i1.p1	T23B12.8	Putative glycoprotein hormone-beta5; Protein T23B12.8, isoform b	https://smart.embl.de/smart/DDvec.cgi?smart=125:SIGNAL(1|19)+GHB(29|125)+	188778,A7DT38,A7DT38_CAEEL,ABK78773.1,BN001265,CAR95352.1,CCD72920.1,CCD72922.1,CE14040,CE41457,CELE_T23B12.8,Cys_knot domain-containing protein,EF090260,G5EEJ3,NM_001129548,NM_001129548.3,NM_072782,NM_072782.3,NP_001123020,NP_001123020.1,NP_001367962,NP_505183,NP_505183.1,Protein T23B12.8, isoform b,Putative glycoprotein hormone-beta5,T23B12.8,T23B12.8a.1,T23B12.8a.2,T23B12.8a.3,T23B12.8b,UPI000…
cbriggsae@@@TRINITY_DN17351_c0_g1_i1.p1	T28F2.2	Comm domain containing 4; Protein T28F2.2 (T28F2.2) mRNA, complete cds	http://smart.embl.de/smart/DDt.cgi?smart=175:	189048,A0A0K3AQR5,A0A0K3AQR5_CAEEL,CCD68361.1,CE31075,CELE_T28F2.2,COMM domain containing 4,Cel.24037,NM_001313511.1,NM_058790,NM_058790.5,NP_001300440.1,NP_001368503,NP_491191,NP_491191.2,O01659,Protein T28F2.2 (T28F2.2) mRNA, complete cds,T28F2.2,T28F2.2b,UPI00000824DE,Uncharacterized protein,WBGene00020901,cel:CELE_T28F2.2
cbriggsae@@@TRINITY_DN10741_c0_g1_i1.p1	W05H9.4	Uncharacterized protein; Protein W05H9.4 (W05H9.4) mRNA, complete cds	http://smart.embl.de/smart/DDt.cgi?smart=780:	3565039,CCD64551.1,CE33721,CELE_W05H9.4,Cel.30865,NM_001029772,NM_001029772.4,NP_001024943,NP_001024943.1,Protein W05H9.4 (W05H9.4) mRNA, complete cds,Q86MI9,Q86MI9_CAEEL,UPI0000185C26,Uncharacterized protein,W05H9.4,WBGene00021051,cel:CELE_W05H9.4
cbriggsae@@@TRINITY_DN26367_c0_g1_i1.p1	Y38C1AA.9	Uncharacterized protein; Protein Y38C1AA.9 (Y38C1AA.9) mRNA, complete cds	https://smart.embl.de/smart/DDvec.cgi?smart=174:SIGNAL(1|22)+COIL(60|96)+EGF(101|134)+EGF(137|171)+	189642,CCD70253.1,CE25243,CELE_Y38C1AA.9,Cel.12090,NM_067470,NM_067470.1,NP_499871,NP_499871.1,Protein Y38C1AA.9 (Y38C1AA.9) mRNA, complete cds,Q9N432,Q9N432_CAEEL,UPI000007828D,Uncharacterized protein,WBGene00021400,Y38C1AA.9,cel:CELE_Y38C1AA.9
cbriggsae@@@TRINITY_DN6962_c0_g1_i1.p1	Y43F4B.5	Phosphoglucomutase / phosphopentomutase; Protein Y43F4B.5, isoform a; Belongs to the phosphohexose mutase family	https://smart.embl.de/smart/DDvec.cgi?smart=595:Pfam_PGM_PMM_I(47|189)+Pfam_PGM_PMM_II(213|324)+Pfam_PGM_PMM_III(330|457)+Pfam_PGM_PMM_IV(486|566)+	176749,5.4.2.2,5.4.2.7,CAA16334.1,CAD90182.1,CE16630,CE34117,CELE_Y43F4B.5,Cel.32900,EC 5.4.2.2,EC 5.4.2.7,NM_001027701,NM_001027701.2,NM_001027702,NM_001027702.3,NP_001022872,NP_001022872.1,NP_001022873,NP_001022873.1,O45934,O45934_CAEEL,Phosphoglucomutase / phosphopentomutase ,Protein Y43F4B.5, isoform a,Q86DA0,UPI0000074965,UPI0000192793,Uncharacterized protein,WBGene00012803,Y43F4B.5,Y43F4B.5…
cbriggsae@@@TRINITY_DN12379_c0_g1_i1.p1	Y46D2A.2	Uncharacterized protein; Protein Y46D2A.2 (Y46D2A.2) mRNA, complete cds	https://smart.embl.de/smart/DDvec.cgi?smart=391:SIGNAL(1|18)+Pfam_Glycoprotein(36|385)+	189952,CCD69508.2,CE48055,CELE_Y46D2A.2,Cel.39383,NM_062103,NM_062103.3,NM_062104,NM_062104.6,NP_494504,NP_494504.3,NP_494505,NP_494505.4,Protein Y46D2A.2 (Y46D2A.2) mRNA, complete cds,Q9N4X1,Q9N4X1_CAEEL,UPI0002999DD4,Uncharacterized protein,WBGene00021590,Y46D2A.2,cel:CELE_Y46D2A.2
cbriggsae@@@TRINITY_DN25012_c0_g1_i1.p1	Y53F4B.14	Protein pet100, animal type; Protein Y53F4B.14, isoform b (Y53F4B.14) mRNA, complete cds	https://smart.embl.de/smart/DDvec.cgi?smart=90:Pfam_Pet100(1|82)+	175157,CAB61084.1,CAB70105.1,CE22403,CE25395,CELE_Y53F4B.14,Cel.20699,H8ESH7,NM_001267532,NM_001267532.1,NM_001267533,NM_001267533.1,NP_001254461,NP_001254461.1,NP_001254462,NP_001254462.1,Protein PET100, animal type,Q9NAA4,Q9NAA4_CAEEL,UPI00000760D5,UPI000252D1BC,Uncharacterized protein,WBGene00013161,Y53F4B.14,Y53F4B.14a,Y53F4B.14b,cel:CELE_Y53F4B.14
cbriggsae@@@TRINITY_DN732_c0_g1_i2.p1	Y54E5A.6	DihydroUridine Synthase two homolog; Protein Y54E5A.6 (Y54E5A.6) mRNA, complete cds	https://smart.embl.de/smart/DDvec.cgi?smart=436:Pfam_Dus(10|336)+DSRM(360|424)+	1.3.1.91,173331,CAA21662.1,CE20317,CELE_Y54E5A.6,Cel.16372,DRBM domain-containing protein,DihydroUridine Synthase two homolog,Dus-2,EC 1.3.1.91,NM_061153,NM_061153.1,NP_493554,NP_493554.1,Protein Y54E5A.6 (Y54E5A.6) mRNA, complete cds,Q9XWJ9,Q9XWJ9_CAEEL,TRNA-dihydrouridine synthase 2 ,UPI0000078761,WBGene00013201,Y54E5A.6,cel:CELE_Y54E5A.6,dus-2
cbriggsae@@@TRINITY_DN10130_c0_g1_i1.p1	Y54E5B.2	Wd_repeats_region domain-containing protein; Protein Y54E5B.2 (Y54E5B.2) mRNA, complete cds	https://smart.embl.de/smart/DDvec.cgi?smart=861:WD40(129|166)+WD40(171|210)+WD40(329|365)+WD40(561|598)+WD40(650|695)+WD40(745|783)+	173352,CAA21713.1,CE19226,CELE_Y54E5B.2,Cel.16371,NM_061183,NM_061183.3,NP_493584,NP_493584.1,Protein Y54E5B.2 (Y54E5B.2) mRNA, complete cds,Q9XWF9,Q9XWF9_CAEEL,UPI00000790BD,Uncharacterized protein,WBGene00013204,WD_REPEATS_REGION domain-containing protein,Y54E5B.2,cel:CELE_Y54E5B.2
cbriggsae@@@TRINITY_DN2901_c0_g1_i1.p1	Y54G2A.41	Uncharacterized protein; Protein Y54G2A.41 (Y54G2A.41) mRNA, complete cds	https://smart.embl.de/smart/DDvec.cgi?smart=112:COIL(11|49)+	3896798,CCD83529.1,CE38893,CELE_Y54G2A.41,NM_001038352,NM_001038352.1,NP_001033441,NP_001033441.1,Protein Y54G2A.41 (Y54G2A.41) mRNA, complete cds,Q4R169,Q4R169_CAEEL,UPI000053E9D3,Uncharacterized protein,WBGene00044485,Y54G2A.41,Y54G2A.41.1,Y54G2A.41.2,cel:CELE_Y54G2A.41
cbriggsae@@@TRINITY_DN13493_c0_g1_i2.p1	Y55F3AM.5	DUF2013 domain-containing protein; Protein Y55F3AM.5 (Y55F3AM.5) mRNA, complete cds	https://smart.embl.de/smart/DDvec.cgi?smart=365:Pfam_DUF2013(232|360)+	190307,CCD74075.1,CE45583,CELE_Y55F3AM.5,Cel.28300,DUF2013 domain-containing protein,NM_067620,NM_067620.4,NP_500021,NP_500021.4,Protein Y55F3AM.5 (Y55F3AM.5) mRNA, complete cds,Q9N372,Q9N372_CAEEL,UPI0001F307F8,Uncharacterized protein,WBGene00021923,Y55F3AM.5,cel:CELE_Y55F3AM.5
cbriggsae@@@TRINITY_DN21455_c0_g1_i1.p1	ZC410.5	Microfilaria Surface-Associated protein; Protein ZC410.5, isoform a	https://smart.embl.de/smart/DDvec.cgi?smart=174:SIGNAL(1|29)+COIL(48|86)+TRANS(154|173)+	177728,CAA92570.1,CAE46688.1,CBK19518.1,CE15209,CE35703,CE44715,CELE_ZC410.5,Cel.11633,Cel.38782,D3YT23,Microfilaria Surface-Associated protein,Msa-1,NM_001028427,NM_001028427.3,NM_001028428,NM_001028428.2,NM_001268434,NM_001268434.1,NP_001023598,NP_001023598.1,NP_001023599,NP_001023599.1,NP_001255363,NP_001255363.1,P91844,P91844_CAEEL,Protein ZC410.5, isoform a,Q7JM19,UPI0000075CF3,UPI00001C0862…
cbriggsae@@@TRINITY_DN14065_c0_g1_i1.p1	ZK856.5	Sphingomyelin phosphodiesterase acid-like 3; Protein ZK856.5 (ZK856.5) mRNA, complete cds	https://smart.embl.de/smart/DDvec.cgi?smart=459:SIGNAL(1|20)+Pfam_Metallophos(21|285)+	191439,3.1.4.-,CAA94853.5,CE44505,CELE_ZK856.5,Cel.19862,EC 3.1.4.-,Metallophos domain-containing protein,NM_073219,NM_073219.5,NP_001369926,NP_505620,NP_505620.4,Protein ZK856.5 (ZK856.5) mRNA, complete cds,Q23640,Q23640_CAEEL,Sphingomyelin phosphodiesterase acid-like 3 ,UPI0001C3A4E5,Uncharacterized protein,WBGene00014106,ZK856.5,cel:CELE_ZK856.5
cbriggsae@@@TRINITY_DN3666_c0_g1_i1.p1	aps-3	AdaPtin, Small chain (Clathrin associated complex); Protein APS-3 (aps-3) mRNA, complete cds	https://smart.embl.de/smart/DDvec.cgi?smart=192:Pfam_Clat_adaptor_s(1|148)+	171691,AP-3 complex subunit sigma,Aps-3,CCD73469.1,CE30461,CELE_Y48G8AL.14,Cel.32770,Clat_adaptor_s domain-containing protein,NM_170798,NM_170798.3,NP_001368004,NP_740780,NP_740780.1,Protein APS-3 (aps-3) mRNA, complete cds,Q8T874,Q8T874_CAEEL,UPI0000080888,WBGene00000165,Y48G8AL.14,aps-3,cel:CELE_Y48G8AL.14
cbriggsae@@@TRINITY_DN12970_c0_g1_i1.p1	arl-3	ADP-ribosylation factor-like protein 3; GTP-binding protein that may be involved in protein trafficking; may modulate vesicle budding and uncoating within the Golgi apparatus	https://smart.embl.de/smart/DDvec.cgi?smart=184:ARF(1|182)+	175121,ADP-ribosylation factor-like protein 3,ARL3_CAEEL,Arl-3,CAB07583.1,CE15872,Cel.17800,F19H8.3,NM_064636,NM_064636.1,NP_497037,NP_497037.1,O45379,Protein ARL-3 (arl-3) mRNA, complete cds,UPI000007652E,WBGene00000188,arl-3,cel:CELE_F19H8.3
cbriggsae@@@TRINITY_DN3549_c0_g1_i1.p1	atad-3	ATPase family AAA domain-containing protein 3; Essential for mitochondrial network organization, mitochondrial metabolism and cell growth at organism and cellular level. Important during development for the up- regulation of mitochondrial activity during the transition to higher larval stages. Regulates mitochondrial iron homeostasis. May play an important role in mitochondrial protein synthesis …	https://smart.embl.de/smart/DDvec.cgi?smart=595:Pfam_DUF3523(25|283)+AAA(341|474)+	174590,ATAD3_CAEEL,ATPase family AAA domain-containing protein 3,ATPase family AAA domain-containing protein 3A/B,Atad-3,CAA88471.2,CE35878,Cel.35091,Cel.7679,F54B3.3,F54B3.3.1,NM_063809,NM_063809.6,NP_496210,NP_496210.2,Protein ATAD-3 (atad-3) mRNA, complete cds,Q20748,UPI00001D68BA,WBGene00010015,atad-3,cel:CELE_F54B3.3
cbriggsae@@@TRINITY_DN25572_c0_g1_i1.p1	car-1	Cytokinesis, Apoptosis, RNA-associated; Protein CAR-1 (car-1) mRNA, complete cds	https://smart.embl.de/smart/DDvec.cgi?smart=340:LSM14(1|101)+FDF(184|271)+	173158,6F9S,CAA22317.1,CE21413,CELE_Y18D10A.17,Car-1,Cel.34343,Cytokinesis, Apoptosis, RNA-associated,NM_060853,NM_060853.5,NP_493254,NP_493254.1,Protein CAR-1 (car-1) mRNA, complete cds,Protein LSM14,Q9XW17,Q9XW17_CAEEL,UPI000007CE69,WBGene00012484,Y18D10A.17,car-1,cel:CELE_Y18D10A.17
cbriggsae@@@TRINITY_DN2376_c0_g1_i2.p1	casy-1	CAlSYntenin/Alcadein homolog; Protein CASY-1, isoform a	https://smart.embl.de/smart/DDvec.cgi?smart=984:SIGNAL(1|18)+CA(38|140)+CA(163|244)+TRANS(849|871)+	174006,AAM00045.1,AY091591,B0034.3,B0034.3a,B0034.3b,B0034.3c,CAlSYntenin/Alcadein homolog,CCD61228.1,CCD61229.1,CCD61230.1,CE27048,CE27049,CE39540,CELE_B0034.3,Calsyntenin,Calsyntenin 1,Casy-1,Cel.33224,Cel.5204,G5ED46,G5ED46_CAEEL,H2KY57,NM_001025939,NM_001025939.5,NM_001047257,NM_001047257.4,NM_062788,NM_062788.4,NP_001021110,NP_001021110.1,NP_001040722,NP_001040722.1,NP_495189,NP_495189.2,Pro…
cbriggsae@@@TRINITY_DN300_c0_g1_i2.p1	cdf-1	Cation diffusion facilitator family protein 1; Involved in the regulation of Pn.p cell fate determination. Involved in zinc metabolism and the decrease of the cytosolic zinc concentration which is thought to modulate Ras signaling	https://smart.embl.de/smart/DDvec.cgi?smart=561:Pfam_Cation_efflux(113|449)+	180923,C15B12.7,C15B12.7a,C15B12.7b,CCD64570.1,CCD64571.1,CDF1_CAEEL,CE27065,CE29581,Cation diffusion facilitator family protein 1,Cel.33330,Cel.7204,NM_076694,NM_076694.4,NM_076695,NM_076695.3,NP_509095,NP_509095.1,NP_509096,NP_509096.1,Q18009,Q95QW4,UPI0000079408,UPI000007A8DB,WBGene00000393,cdf-1
cbriggsae@@@TRINITY_DN1262_c0_g1_i1.p1	coq-5	2-methoxy-6-polyprenyl-1,4-benzoquinol methylase, mitochondrial; Methyltransferase required for the conversion of 2- polyprenyl-6-methoxy-1,4-benzoquinol (DDMQH2) to 2-polyprenyl-3- methyl-6-methoxy-1,4-benzoquinol (DMQH2)	https://smart.embl.de/smart/DDvec.cgi?smart=285:Pfam_Methyltransf_23(73|267)+	176099,2.1.1.201,CCD62554.1,CE29014,COQ5_CAEEL,Cel.9527,Coq-5,EC 2.1.1.201,NM_066303,NM_066303.6,NP_498704,NP_498704.1,P34666,Protein COQ-5 (coq-5) mRNA, complete cds,UPI0000061367,Ubiquinone biosynthesis methyltransferase COQ5,WBGene00000765,ZK652.9,cel:CELE_ZK652.9,coq-5
cbriggsae@@@TRINITY_DN21258_c0_g1_i1.p1	cpx-1	Putative complexin-1; Positively regulates a late step in synaptic vesicle exocytosis	https://smart.embl.de/smart/DDvec.cgi?smart=143:Pfam_Synaphin(2|133)+	190666,CCD73528.1,CE26415,CPLX1_CAEEL,Cel.16280,Complexin-1/2,Cpx-1,NM_058467,NM_058467.3,NP_490868,NP_490868.1,Protein CPX-1 (cpx-1) mRNA, complete cds,Putative complexin-1,Q9GUM7,UPI0000079E0F,WBGene00022271,Y73E7A.4,cel:CELE_Y73E7A.4,cpx-1
cbriggsae@@@TRINITY_DN17579_c0_g1_i1.p1	cuc-1	Hma domain-containing protein; CU (Copper) Chaperonin; Protein CUC-1 (cuc-1) mRNA, complete cds	https://smart.embl.de/smart/DDvec.cgi?smart=69:Pfam_HMA(5|64)+	176102,AB017201,BAA37144.1,CCD62556.1,CE29163,CELE_ZK652.11,CU (Copper) Chaperonin,CUC-1,Copper chaperone,Cuc-1,G5EE41,G5EE41_CAEEL,HMA domain-containing protein,NM_066306,NM_066306.7,NP_498707,NP_498707.1,Protein CUC-1 (cuc-1) mRNA, complete cds,UPI000006136A,WBGene00000835,ZK652.11,cel:CELE_ZK652.11,cuc-1
cbriggsae@@@TRINITY_DN2723_c0_g1_i1.p1	cup-5	Pkd_channel domain-containing protein; CUP-5L; Protein CUP-5, isoform e (cup-5) mRNA, complete cds	https://smart.embl.de/smart/DDvec.cgi?smart=668:TRANS(70|92)+Pfam_PKD_channel(333|556)+	176074,AAK19624.1,AAL89754.1,AF338583,AF482952,CCD63597.1,CCD63598.1,CCD63608.1,CCD63610.1,CCD63612.1,CE30111,CE34586,CE45023,CE46153,CE46318,CELE_R13A5.1,CUP-5L,Cel.17330,Cel.38083,Cup-5,D7UU24,H2KYJ9,H2KYK0,Mucolipin 3,NM_001027548,NM_001027548.4,NM_001027550,NM_001027550.2,NM_001027551,NM_001027551.2,NM_001268016,NM_001268016.1,NM_066263,NM_066263.4,NP_001022719,NP_001022719.2,NP_001022721,NP_…
cbriggsae@@@TRINITY_DN25293_c0_g1_i1.p1	cyn-6	Peptidyl-prolyl cis-trans isomerase b (cyclophilin b); Peptidyl-prolyl cis-trans isomerase 6; PPIases accelerate the folding of proteins. It catalyzes the cis-trans isomerization of proline imidic peptide bonds in oligopeptides	https://smart.embl.de/smart/DDvec.cgi?smart=201:SIGNAL(1|19)+Pfam_Pro_isomerase(29|186)+	175231,5.2.1.8,AAC47124.1,CCD61884.1,CE01301,CYP6_CAEEL,Cyclophilin-6,Cyn-6,EC 5.2.1.8,F42G9.2,FO080196,NM_064856,NM_064856.6,NP_497257,NP_497257.1,P52014,PPIase 6,Peptidyl-prolyl cis-trans isomerase 6,Protein CYN-6 (cyn-6) mRNA, complete cds,Rotamase 6,U27354,UPI0000128C6E,WBGene00000882,cel:CELE_F42G9.2,cyn-6,cyp-6
cbriggsae@@@TRINITY_DN6855_c0_g1_i2.p1	dcar-1	G_PROTEIN_RECEP_F1_2 domain-containing protein; L-3,4-dihydroxyphenylalanine receptor; Protein DCAR-1 (dcar-1) mRNA, complete cds	https://smart.embl.de/smart/DDvec.cgi?smart=396:TRANS(37|59)+TRANS(80|102)+TRANS(117|139)+TRANS(152|174)+TRANS(205|224)+TRANS(256|278)+TRANS(293|315)+	259679,AB070577,BAC66472.1,C06H5.7,CAB62778.2,CE31877,CELE_C06H5.7,Cel.7410,Dcar-1,DihydroCaffeic Acid Receptor,G5EDI0,G5EDI0_CAEEL,G_PROTEIN_RECEP_F1_2 domain-containing protein,L-3,4-dihydroxyphenylalanine receptor,NM_075110,NM_075110.5,NP_507511,NP_507511.2,Protein DCAR-1 (dcar-1) mRNA, complete cds,UPI0000083A6F,WBGene00007395,cel:CELE_C06H5.7,dcar-1
cbriggsae@@@TRINITY_DN9065_c0_g1_i2.p1	dhs-17	DeHydrogenases, Short chain; Protein DHS-17, isoform b (dhs-17) mRNA, complete cds	https://smart.embl.de/smart/DDvec.cgi?smart=317:Pfam_KR(39|216)+	178990,CCD64136.1,CCD64137.1,CE27376,CE40050,CELE_F29G9.6,Cel.3821,DeHydrogenases, Short chain,Dhs-17,F29G9.6,F29G9.6a,F29G9.6b,NM_001047643,NM_001047643.2,NM_001047644,NM_001047644.1,NP_001041108,NP_001041108.1,NP_001041109,NP_001041109.1,O16371,Q1XFZ3,Q1XFZ3_CAEEL,UPI000007F5C9,UPI00006E2517,WBGene00000980,cel:CELE_F29G9.6,dhs-17
cbriggsae@@@TRINITY_DN5067_c0_g1_i1.p1	dpy-11	Thioredoxin domain-containing protein; Protein DPY-11 (dpy-11) mRNA, complete cds	https://smart.embl.de/smart/DDvec.cgi?smart=246:SIGNAL(1|18)+Pfam_Thioredoxin(25|125)+TRANS(176|198)+	179040,AAG17620.1,AF250045,CCD71315.1,CE20819,CELE_F46E10.9,Cel.196,Dpy-11,DumPY: shorter than wild-type,F46E10.9,F46E10.9.1,F46E10.9.2,G5EC91,G5EC91_CAEEL,NM_072254,NM_072254.4,NP_001370731,NP_504655,NP_504655.1,Protein DPY-11 (dpy-11) mRNA, complete cds,Thioredoxin domain-containing protein,Thioredoxin-like protein DPY-11,UPI0000081AB8,WBGene00001073,cel:CELE_F46E10.9,dpy-11
cbriggsae@@@TRINITY_DN2126_c0_g1_i2.p1	drr-1	Dietary Restriction Response (WT but not eat-2 lifespan increased); Protein DRR-1 (drr-1) mRNA, complete cds	https://smart.embl.de/smart/DDvec.cgi?smart=174:TRANS(21|43)+TRANS(48|70)+TRANS(83|105)+TRANS(120|142)+	174994,CAB04386.1,CE10548,CELE_F45H10.4,Cel.15075,Drr-1,F45H10.4,MARVEL domain-containing protein,NM_064439,NM_064439.5,NP_496840,NP_496840.1,O02268,O02268_CAEEL,Protein DRR-1 (drr-1) mRNA, complete cds,UPI0000074E8F,WBGene00009741,cel:CELE_F45H10.4,drr-1
cbriggsae@@@TRINITY_DN892_c0_g1_i6.p1	glna-1	Ank_rep_region domain-containing protein; GLutamiNAse; Protein GLNA-1, isoform e (glna-1) mRNA, complete cds	https://smart.embl.de/smart/DDvec.cgi?smart=856:Pfam_Glutaminase(233|526)+ANK(550|579)+ANK(583|612)+	175130,3.5.1.2,ANK_REP_REGION domain-containing protein,B0M0N9,B0M0P0,B6VQ90,C09F9.3,C09F9.3a,C09F9.3b,C09F9.3c,C09F9.3d,C09F9.3e,C09F9.3f,CAP72487.1,CAP72488.1,CAR97803.1,CCE72074.1,CCE72075.1,CDH93328.1,CE42058,CE42229,CE43286,CE46704,CE46765,CE48810,Cel.15913,EC 3.5.1.2,Glna-1,Glutaminase ,H2L2H2,H2L2H3,NM_001267518,NM_001267518.1,NM_001267519,NM_001267519.1,NM_001267520,NM_001267520.1,NM_0013…
cbriggsae@@@TRINITY_DN6173_c0_g1_i1.p1	grk-1	G protein-coupled receptor kinase 1; Specifically phosphorylates the activated forms of G protein-coupled receptors	https://smart.embl.de/smart/DDvec.cgi?smart=642:RGS(51|188)+S_TKc(203|470)+S_TK_X(480|559)+	181212,2.7.11.16,CAA88047.1,CE01554,Cel.1193,EC 2.7.11.16,F19C6.1,G protein-coupled receptor kinase ,G protein-coupled receptor kinase 1,GRK1_CAEEL,Grk-1,NM_077275,NM_077275.4,NP_509676,NP_509676.1,Protein GRK-1 (grk-1) mRNA, complete cds,Q09537,UPI000013BF45,WBGene00001708,cel:CELE_F19C6.1,grk-1
cbriggsae@@@TRINITY_DN509_c0_g1_i1.p1	gst-15	Glutathione S-Transferase; Protein GST-15 (gst-15) mRNA, complete cds	https://smart.embl.de/smart/DDvec.cgi?smart=213:Pfam_GST_N(4|77)+Pfam_GST_C(102|199)+	185410,CAB02290.1,CE09991,CELE_F37B1.4,Cel.15200,F37B1.4,Glutathione S-Transferase,Gst-15,NM_064459,NM_064459.1,NP_496860,NP_496860.1,Protein GST-15 (gst-15) mRNA, complete cds,Q93697,Q93697_CAEEL,UPI000007FBB6,WBGene00001763,cel:CELE_F37B1.4,gst-15
cbriggsae@@@TRINITY_DN21362_c0_g1_i1.p1	hmt-1	Atp-binding cassette, subfamily b (mdr/tap), member 6; Heavy metal tolerance factor 1; Protein HMT-1 (hmt-1) mRNA, complete cds	https://smart.embl.de/smart/DDvec.cgi?smart=801:TRANS(25|47)+TRANS(68|90)+TRANS(100|122)+TRANS(129|151)+TRANS(166|188)+Pfam_ABC_membrane(227|504)+AAA(575|767)+	176540,AAM33380.1,AAM33381.1,AAQ06435.1,AF490977,AF497513,AF497514,CAB04947.3,CE31731,CELE_W09D6.6,Cel.37530,G5EFD4,G5EFD4_CAEEL,Heavy Metal Tolerance factor,Heavy metal tolerance factor 1,Hmt-1,NM_001027641,NM_001027641.3,NP_001022812,NP_001022812.1,Protein HMT-1 (hmt-1) mRNA, complete cds,Q71JP7,See hmt,UPI0000078C54,W09D6.6,WBGene00001815,cel:CELE_W09D6.6,hmt-1
cbriggsae@@@TRINITY_DN538_c0_g1_i1.p1	lin-33	Uncharacterized protein; Protein LIN-33 (lin-33) mRNA, complete cds	http://smart.embl.de/smart/DDt.cgi?smart=243:	177361,CCD72481.1,CE21004,CELE_H32C10.2,Cel.12720,FO081569,H32C10.2,H32C10.2a,Lin-33,NM_068489,NM_068489.4,NP_500890,NP_500890.1,Protein LIN-33 (lin-33) mRNA, complete cds,Q9TYQ5,Q9TYQ5_CAEEL,UPI000007C739,Uncharacterized protein,WBGene00003019,cel:CELE_H32C10.2,lin-33
cbriggsae@@@TRINITY_DN21348_c0_g1_i1.p1	mbd-2	Methyl-cpg-binding domain protein 2; Methyl-CpG BinDing protein; Protein MBD-2 (mbd-2) mRNA, complete cds	https://smart.embl.de/smart/DDvec.cgi?smart=210:Pfam_MBD_C(111|206)+	3565704,AAY32916.1,C27A12.10,CCD61208.1,CE36794,CELE_C27A12.10,Cel.29702,DQ010405,G5ECR1,G5ECR1_CAEEL,MBD_C domain-containing protein,Mbd-2,Methyl-CpG BinDing protein,Methyl-CpG-binding domain protein 2,Methyl-binding protein-2,NM_001025841,NM_001025841.3,NP_001021012,NP_001021012.1,Protein MBD-2 (mbd-2) mRNA, complete cds,UPI00003B424B,WBGene00023409,cel:CELE_C27A12.10,mbd-2
cbriggsae@@@TRINITY_DN367_c0_g1_i1.p1	mec-5	Uncharacterized protein; MEC-5; Protein MEC-5 (mec-5) mRNA, complete cds	https://smart.embl.de/smart/DDvec.cgi?smart=327:SIGNAL(1|16)+Pfam_Collagen(53|114)+Pfam_Collagen(205|267)+	181678,AAA96504.1,AAA96505.1,CAA92149.2,CE31464,CELE_E03G2.3,Cel.19735,E03G2.3,G5EFQ9,G5EFQ9_CAEEL,MEC-5,Mec-5,NM_171808,NM_171808.3,NP_741941,NP_741941.1,Protein MEC-5 (mec-5) mRNA, complete cds,U33918,U33919,UPI0000082BA4,Uncharacterized protein,WBGene00003169,cel:CELE_E03G2.3,mec-5
cbriggsae@@@TRINITY_DN1023_c0_g1_i5.p1	mrck-1	Serine/threonine-protein kinase mrck-1; Serine/threonine-protein kinase that may phosphorylate and inactivate the phosphatase mel-11, and thereby contribute to the regulation of myosin II contractility during embryonic elongation. Involved in controlling canal length and Golgi/ER integrity during excretory canal elongation; Belongs to the protein kinase superfamily. AGC Ser/Thr protein kinase fam…	https://smart.embl.de/smart/DDvec.cgi?smart=1592:S_TKc(83|351)+S_TK_X(352|418)+COIL(453|781)+COIL(811|871)+C1(958|1007)+PH(1027|1156)+CNH(1182|1494)+PBD(1544|1582)+	179013,2.7.11.1,CCD70382.1,CE30818,Cel.20082,Cel.33306,EC 2.7.11.1,FO081273,K08B12.5,K08B12.5.1,K08B12.5.2,MRCK_CAEEL,Mrck-1,NM_072198,NM_072198.5,NP_001300141,NP_504599,NP_504599.2,Non-specific serine/threonine protein kinase,O01583,Protein MRCK-1 (mrck-1) mRNA, complete cds,Serine/threonine-protein kinase MRCK ,Serine/threonine-protein kinase mrck-1,UPI0000078363,WBGene00006437,cel:CELE_K08B12.…
cbriggsae@@@TRINITY_DN3223_c0_g1_i1.p1	myo-6	MYOsin heavy chain structural genes; Protein MYO-6, isoform a; Belongs to the TRAFAC class myosin-kinesin ATPase superfamily. Myosin family	https://smart.embl.de/smart/DDvec.cgi?smart=1235:Pfam_Myosin_N(34|72)+MYSc(79|782)+COIL(842|1056)+COIL(1088|1152)+	176764,CAB07611.2,CAI46609.1,CE28727,CE37971,CELE_F45G2.2,Cel.4935,F45G2.2,F45G2.2a,F45G2.2b.1,F45G2.2b.2,MYOsin heavy chain structural genes,Myo-6,Myosin motor domain-containing protein,NM_001027419,NM_001027419.3,NM_001027420,NM_001027420.2,NP_001022590,NP_001022590.1,NP_001022591,NP_001022591.1,O62244,O62244_CAEEL,Protein MYO-6, isoform a,Q5FC20,UPI000007C61C,UPI00004C4DA0,WBGene00009730,cel:C…
cbriggsae@@@TRINITY_DN21314_c0_g1_i1.p1	paqr-1	Progestin and adipoQ receptor-like protein 1; Probable receptor, which may be involved in metabolic pathways that regulate lipid metabolism such as fatty acid oxidation	https://smart.embl.de/smart/DDvec.cgi?smart=434:PAC(103|146)+Pfam_HlyIII(195|416)+	177416,ADRL_CAEEL,Adiponectin receptor,C43G2.1,C43G2.1.1,C43G2.1.2,C43G2.1a,CCD62451.1,CE27848,Cel.37575,Cel.39108,NM_068597,NM_068597.5,NP_001367391,NP_500998,NP_500998.1,Paqr-1,Progestin and adipoQ receptor-like protein 1,Protein PAQR-1 (paqr-1) mRNA, complete cds,Q94177,UPI000008332A,WBGene00016610,cel:CELE_C43G2.1,paqr-1
cbriggsae@@@TRINITY_DN3779_c0_g2_i1.p1	pgp-6	p-GlycoProtein related; Protein PGP-6, isoform c	https://smart.embl.de/smart/DDvec.cgi?smart=1263:Pfam_ABC_membrane(43|331)+AAA(408|594)+Pfam_ABC_membrane(695|968)+TRANS(983|1000)+AAA(1043|1230)+	181278,CAA94220.3,CAJ85767.2,CCC42201.1,CE40818,CE40819,CE46295,CELE_T21E8.1,Cel.30274,G1K0X0,NM_001047822,NM_001047822.3,NM_001047823,NM_001047823.3,NM_001270189,NM_001270189.1,NP_001041287,NP_001041287.2,NP_001041288,NP_001041288.2,NP_001257118,NP_001257118.1,P-GlycoProtein related,Pgp-6,Protein PGP-6, isoform c,Q1ZXU6,Q22656,Q22656_CAEEL,T21E8.1,T21E8.1a,T21E8.1b.1,T21E8.1b.2,T21E8.1c,UPI0000F…
cbriggsae@@@TRINITY_DN21749_c0_g1_i1.p1	pisy-1	CDP-diacylglycerol--inositol 3-phosphatidyltransferase; Protein PISY-1 (pisy-1) mRNA, complete cds	https://smart.embl.de/smart/DDvec.cgi?smart=220:Pfam_CDP-OH_P_transf(15|78)+TRANS(142|164)+TRANS(174|196)+	174902,2.7.8.11,CAB60350.1,CE21973,CELE_Y46G5A.5,EC 2.7.8.11,NM_064310,NM_064310.3,NP_496711,NP_496711.1,Pisy-1,Protein PISY-1 (pisy-1) mRNA, complete cds,Q9U2G1,Q9U2G1_CAEEL,UPI0000076AD1,WBGene00012897,Y46G5A.5,cel:CELE_Y46G5A.5,pisy-1
cbriggsae@@@TRINITY_DN620_c0_g1_i2.p1	pmp-2	Atp-binding cassette, subfamily d (ald), member 3; Peroxisomal Membrane Protein related; Protein PMP-2 (pmp-2) mRNA, complete cds	https://smart.embl.de/smart/DDvec.cgi?smart=661:Pfam_ABC_membrane_2(60|341)+AAA(467|642)+	174127,C44B7.9,CCD61563.1,CE02547,CELE_C44B7.9,Cel.15673,NM_063007,NM_063007.4,NP_495408,NP_495408.1,Peroxisomal Membrane Protein related,Pmp-2,Protein PMP-2 (pmp-2) mRNA, complete cds,Q18598,Q18598_CAEEL,UPI000007876F,WBGene00004059,cel:CELE_C44B7.9,pmp-2
cbriggsae@@@TRINITY_DN16408_c0_g1_i1.p1	ptps-1	Putative 6-pyruvoyl tetrahydrobiopterin synthase; Involved in the biosynthesis of tetrahydrobiopterin, an essential cofactor of aromatic amino acid hydroxylases. Catalyzes the transformation of 7,8-dihydroneopterin triphosphate into 6- pyruvoyl tetrahydropterin (By similarity); Belongs to the PTPS family	https://smart.embl.de/smart/DDvec.cgi?smart=140:Pfam_PTPS(8|140)+	181823,2G64,4.1.2.50,4.2.3.12,B0041.6,B0041.6a,B0041.6b,CCD61251.1,CCD61252.1,CE34237,CE39541,Cel.23560,EC 4.1.2.50,EC 4.2.3.12,NM_001047161,NM_001047161.1,NM_001047162,NM_001047162.2,NP_001040626,NP_001040626.1,NP_001040627,NP_001040627.1,O02058,PTP synthase,PTPS,PTPS_CAEEL,Protein PTPS-1, isoform a,Ptps-1,Putative 6-pyruvoyl tetrahydrobiopterin synthase,Q2MGF4,UPI00001A98E2,UPI0000683C93,WBGene…
cbriggsae@@@TRINITY_DN5088_c0_g2_i1.p2	rab-35	Ras-related protein rab-35; Protein RAB-35 (rab-35) mRNA, complete cds	https://smart.embl.de/smart/DDvec.cgi?smart=209:RAB(11|173)+	176560,AAB16965.1,CAB57899.1,CE24336,CELE_Y47D3A.25,NM_067053,NM_067053.3,NP_499454,NP_499454.1,Protein RAB-35 (rab-35) mRNA, complete cds,Q94141,Q9U2C3,Q9U2C3_CAEEL,RAB family,Rab-35,Ras-related protein Rab-35,U68250,UPI000007AC5D,WBGene00004284,Y47D3A.25,Y47D3A.25.2,cel:CELE_Y47D3A.25,rab-35
cbriggsae@@@TRINITY_DN4078_c0_g1_i1.p1	sec-15	Exocyst complex component 6; Component of the exocyst complex involved in the docking of exocytic vesicles with fusion sites on the plasma membrane	https://smart.embl.de/smart/DDvec.cgi?smart=817:Pfam_Vps51(51|123)+Pfam_Sec15(477|783)+	181131,C28G1.3,CCD63330.1,CE37614,Cel.17118,Cel.24826,EXOC6_CAEEL,Exocyst complex component 6,Exocyst complex component Sec15,NM_077095,NM_077095.6,NP_509496,NP_509496.3,Protein SEC-15 (sec-15) mRNA, complete cds,Q18286,Sec-15,UPI000044F58E,WBGene00016188,cel:CELE_C28G1.3,sec-15
cbriggsae@@@TRINITY_DN6892_c0_g1_i1.p1	skr-16	SKp1 Related (Ubiquitin ligase complex component); Protein SKR-16 (skr-16) mRNA, complete cds; Belongs to the SKP1 family	https://smart.embl.de/smart/DDvec.cgi?smart=181:Skp1(29|133)+Pfam_Skp1(134|175)+	191765,C42D4.6,CCD66618.1,CE37712,CELE_C42D4.6,Cel.25061,NM_068727,NM_068727.5,NP_501128,NP_501128.2,Protein SKR-16 (skr-16) mRNA, complete cds,Q18567,Q18567_CAEEL,S-phase kinase-associated protein 1,Skr-16,UPI000045238B,WBGene00004822,cel:CELE_C42D4.6,skr-16
cbriggsae@@@TRINITY_DN245_c0_g2_i2.p1	spp-10	SaPosin-like Protein family; Protein SPP-10, isoform b	https://smart.embl.de/smart/DDvec.cgi?smart=429:SIGNAL(1|16)+SapB(36|109)+SapB(137|213)+SapB(260|335)+	177651,C28C12.7,C28C12.7a,C28C12.7a.1,C28C12.7b,CCD64008.1,CCD64009.1,CE29486,CE31323,CELE_C28C12.7,Cel.13453,NM_171399,NM_171399.4,NM_171400,NM_171400.3,NP_741465,NP_741465.1,NP_741466,NP_741466.1,Protein SPP-10, isoform b,Q18276,Q18276_CAEEL,Q18278,Q4JFH6,SaPosin-like Protein family,Saposin,Spp-10,UPI000002A214,UPI00000866B3,WBGene00004995,cel:CELE_C28C12.7,spp-10
cbriggsae@@@TRINITY_DN6764_c0_g2_i1.p1	tag-250	Putative protein tag-250; Protein TAG-250, isoform b (tag-250) mRNA, complete cds	https://smart.embl.de/smart/DDvec.cgi?smart=626:TUDOR(222|279)+TUDOR(451|509)+	176113,C29E4.5,C29E4.5a,C29E4.5b,C8JQN7,CCD66014.1,CCD66015.1,CE43781,CE43801,Cel.17806,Cel.39223,NM_001026017,NM_001026017.3,NM_001026018,NM_001026018.2,NP_001021188,NP_001021188.2,NP_001021189,NP_001021189.2,P34344,Putative protein tag-250,Q4TTD4,TG250_CAEEL,Tag-250,UPI00004B77EA,UPI00004B77EB,WBGene00016203,cel:CELE_C29E4.5,tag-250
cbriggsae@@@TRINITY_DN8241_c0_g1_i1.p1	ugtp-1	Solute carrier family 35 (udp-sugar transporter), member a1/2/3; UDP-galactose translocator 1; Protein UGTP-1 (ugtp-1) mRNA, complete cds	https://smart.embl.de/smart/DDvec.cgi?smart=355:Pfam_Nuc_sug_transp(37|351)+	176227,CCD61726.1,CE29642,Cel.22548,NM_066529,NM_066529.5,NP_498930,NP_498930.1,P34632,Protein UGTP-1 (ugtp-1) mRNA, complete cds,Q02334,UDP-galactose translocator 1,UGTP1_CAEEL,UPI000013BC9D,Ugtp-1,WBGene00022721,ZK370.7,ZK370.7/ZK370.9,cel:CELE_ZK370.7,ugtp-1
cbriggsae@@@TRINITY_DN25399_c0_g1_i1.p1	wdfy-2	WD repeat and FYVE domain-containing protein 2; Plays a role in coelomocyte endocytosis	https://smart.embl.de/smart/DDvec.cgi?smart=415:WD40(20|59)+WD40(110|149)+WD40(193|232)+WD40(236|275)+FYVE(281|358)+WD40(364|403)+	174475,CAA87770.1,CE00928,D2013.2,D2013.2.1,D2013.2.2,NM_063582,NM_063582.3,NP_495983,NP_495983.1,Protein WDFY-2 (wdfy-2) mRNA, complete cds,Q18964,UPI000013B846,WBGene00008402,WD repeat and FYVE domain-containing protein 2,WDFY2_CAEEL,Wdfy-2,cel:CELE_D2013.2,wdfy-2
cbriggsae@@@TRINITY_DN4757_c0_g2_i1.p1	wrb-1	WRB (Human W(Tryptophan)-Rich Basic nuclear protein) homolog; Protein WRB-1, isoform a (wrb-1) mRNA, complete cds	https://smart.embl.de/smart/DDvec.cgi?smart=196:Pfam_CHD5(13|169)+	178617,CCD67101.1,CCD67105.1,CE30026,CE45169,CELE_Y50D4A.2,Cel.19868,G4S708,NM_001269064,NM_001269064.1,NM_001269065,NM_001269065.1,NP_001255993,NP_001255993.1,NP_001255994,NP_001255994.1,Q8WTM8,Q8WTM8_CAEEL,UPI0000075ECA,UPI0001F779F3,WBGene00021736,Wrb-1,Y50D4A.2,Y50D4A.2.1,Y50D4A.2a.1,Y50D4A.2a.2,Y50D4A.2b,cel:CELE_Y50D4A.2,wrb-1

## Sheet: Cbriggsae_Enrichment
cluster.number	#category	term ID	term description	observed gene count	background gene count	strength	false discovery rate	matching proteins in your network (IDs)	matching proteins in your network (labels)
9	STRING clusters	6239_CL:9255	Acyltransferase	2	10	2.78	0.0126	6239.F28B3.9,6239.T05H4.1	acl-11,acl-8
9	KEGG	map00561	Glycerolipid metabolism	2	22	2.44	0.002	6239.F28B3.9,6239.T05H4.1	acl-11,acl-8
9	KEGG	map00564	Glycerophospholipid metabolism	2	45	2.13	0.0038	6239.F28B3.9,6239.T05H4.1	acl-11,acl-8
9	Pfam	PF16076	Acyltransferase C-terminus	2	4	3.18	0.0016	6239.F28B3.9,6239.T05H4.1	acl-11,acl-8
9	Pfam	PF01553	Acyltransferase	2	12	2.71	0.0049	6239.F28B3.9,6239.T05H4.1	acl-11,acl-8
9	InterPro	IPR032098	Acyltransferase, C-terminal domain	2	4	3.18	0.0029	6239.F28B3.9,6239.T05H4.1	acl-11,acl-8
9	InterPro	IPR002123	Phospholipid/glycerol acyltransferase	2	13	2.67	0.01	6239.F28B3.9,6239.T05H4.1	acl-11,acl-8
9	SMART	SM00563	Phosphate acyltransferases	2	13	2.67	0.0031	6239.F28B3.9,6239.T05H4.1	acl-11,acl-8
2	GO Process	GO:0007165	Signal transduction	5	383	1.05	0.0463	6239.C14F5.5,6239.D2013.1,6239.F17C8.4.1,6239.K10F12.3a,6239.W03C9.3.2	sem-5,rab-39,ras-2,pll-1,rab-7
2	GO Process	GO:0007265	Ras protein signal transduction	3	38	1.84	0.0463	6239.C14F5.5,6239.D2013.1,6239.W03C9.3.2	sem-5,rab-39,rab-7
2	GO Process	GO:0035556	Intracellular signal transduction	4	195	1.25	0.0463	6239.C14F5.5,6239.D2013.1,6239.K10F12.3a,6239.W03C9.3.2	sem-5,rab-39,pll-1,rab-7
2	GO Function	GO:0003924	GTPase activity	4	90	1.59	0.003	6239.D2013.1,6239.F17C8.4.1,6239.W03C9.3.2,6239.ZK1248.14	rab-39,ras-2,rab-7,fzo-1
2	GO Function	GO:0005525	GTP binding	4	117	1.47	0.0041	6239.D2013.1,6239.F17C8.4.1,6239.W03C9.3.2,6239.ZK1248.14	rab-39,ras-2,rab-7,fzo-1
2	KEGG	map04137	Mitophagy - animal	3	23	2.05	0.00031	6239.F17C8.4.1,6239.W03C9.3.2,6239.ZK1248.14	ras-2,rab-7,fzo-1
2	KEGG	map04140	Autophagy - animal	3	64	1.61	0.0028	6239.D2013.1,6239.F17C8.4.1,6239.W03C9.3.2	rab-39,ras-2,rab-7
2	Pfam	PF00025	ADP-ribosylation factor family	3	52	1.7	0.0311	6239.D2013.1,6239.F17C8.4.1,6239.W03C9.3.2	rab-39,ras-2,rab-7
2	Pfam	PF00071	Ras family	3	49	1.73	0.0311	6239.D2013.1,6239.F17C8.4.1,6239.W03C9.3.2	rab-39,ras-2,rab-7
2	Pfam	PF01926	50S ribosome-binding GTPase	3	45	1.76	0.0311	6239.D2013.1,6239.W03C9.3.2,6239.ZK1248.14	rab-39,rab-7,fzo-1
2	Pfam	PF08477	Ras of Complex, Roc, domain of DAPkinase	3	47	1.74	0.0311	6239.D2013.1,6239.F17C8.4.1,6239.W03C9.3.2	rab-39,ras-2,rab-7
2	InterPro	IPR001806	Small GTPase	3	37	1.85	0.0318	6239.D2013.1,6239.F17C8.4.1,6239.W03C9.3.2	rab-39,ras-2,rab-7
13	GO Component	GO:0016469	Proton-transporting two-sector atpase complex	2	30	2.31	0.0253	6239.T14G11.3,6239.Y38F2AL.3a	immt-1,vha-11
13	COMPARTMENTS	GOCC:0016469	Proton-transporting two-sector atpase complex	2	29	2.32	0.0295	6239.T14G11.3,6239.Y38F2AL.3a	immt-1,vha-11
3	KEGG	map03040	Spliceosome	3	99	1.49	0.0115	6239.F01F1.7,6239.M03F8.3b,6239.Y49E10.15	ddx-23,M03F8.3,snr-6
3	COMPARTMENTS	GOCC:0005634	Nucleus	6	693	0.94	0.0026	6239.B0464.7,6239.F01F1.7,6239.F31D4.1,6239.M01D7.6.1,6239.M03F8.3b,6239.Y49E10.15	baf-1,ddx-23,exos-7,emr-1,M03F8.3,snr-6
3	COMPARTMENTS	GOCC:0043231	Intracellular membrane-bounded organelle	6	1227	0.7	0.0401	6239.B0464.7,6239.F01F1.7,6239.F31D4.1,6239.M01D7.6.1,6239.M03F8.3b,6239.Y49E10.15	baf-1,ddx-23,exos-7,emr-1,M03F8.3,snr-6
6	GO Component	GO:0005838	Proteasome regulatory particle	2	22	2.27	0.042	6239.Y49E10.1,6239.ZK20.5.2	rpt-6,rpn-12
6	KEGG	map03050	Proteasome	2	37	2.04	0.0157	6239.Y49E10.1,6239.ZK20.5.2	rpt-6,rpn-12
6	WikiPathways	WP470	Proteasome degradation	2	33	2.09	0.0055	6239.Y49E10.1,6239.ZK20.5.2	rpt-6,rpn-12
6	COMPARTMENTS	GOCC:0005838	Proteasome regulatory particle	2	17	2.38	0.0325	6239.Y49E10.1,6239.ZK20.5.2	rpt-6,rpn-12
6	COMPARTMENTS	GOCC:0022624	Proteasome accessory complex	2	19	2.33	0.0325	6239.Y49E10.1,6239.ZK20.5.2	rpt-6,rpn-12
6	COMPARTMENTS	GOCC:0000502	Proteasome complex	2	35	2.06	0.0421	6239.Y49E10.1,6239.ZK20.5.2	rpt-6,rpn-12
6	COMPARTMENTS	GOCC:1905369	Endopeptidase complex	2	44	1.96	0.049	6239.Y49E10.1,6239.ZK20.5.2	rpt-6,rpn-12
6	UniProt Keywords	KW-0647	Proteasome	2	30	2.13	0.031	6239.Y49E10.1,6239.ZK20.5.2	rpt-6,rpn-12
4	KEGG	map04130	SNARE interactions in vesicular transport	2	18	2.35	0.004	6239.B0361.10.1,6239.Y110A7A.11	ykt-6,use-1
1	GO Function	GO:0003735	Structural constituent of ribosome	4	129	1.37	0.0237	6239.B0393.1.1,6239.T23B12.2,6239.Y119C1B.4,6239.Y37E3.8a	rps-0,mrpl-4,mrpl-19,Y37E3.8
1	GO Component	GO:0005840	Ribosome	5	161	1.37	0.0007	6239.B0393.1.1,6239.F42A10.1.2,6239.T23B12.2,6239.Y119C1B.4,6239.Y37E3.8a	rps-0,abcf-3,mrpl-4,mrpl-19,Y37E3.8
1	KEGG	map03010	Ribosome	4	118	1.41	0.0013	6239.B0393.1.1,6239.T23B12.2,6239.Y119C1B.4,6239.Y37E3.8a	rps-0,mrpl-4,mrpl-19,Y37E3.8
1	WikiPathways	WP525	Mitochondrial unfolded-protein response	4	214	1.15	0.0057	6239.B0393.1.1,6239.T23B12.2,6239.Y119C1B.4,6239.Y37E3.8a	rps-0,mrpl-4,mrpl-19,Y37E3.8
1	UniProt Keywords	KW-0689	Ribosomal protein	4	134	1.36	0.0064	6239.B0393.1.1,6239.T23B12.2,6239.Y119C1B.4,6239.Y37E3.8a	rps-0,mrpl-4,mrpl-19,Y37E3.8
11	GO Process	GO:0030703	Eggshell formation	2	13	2.67	0.027	6239.K10D2.6.1,6239.Y17G9B.3	emb-8,cyp-31A3
11	STRING clusters	6239_CL:15638	NADPH-cytochrome P450 reductase, and eggshell formation	2	2	3.48	0.0011	6239.K10D2.6.1,6239.Y17G9B.3	emb-8,cyp-31A3
5	STRING clusters	6239_CL:21086	Mixed, incl. collagen trimer, and storage protein	3	55	2.04	0.0029	6239.F20H11.5,6239.F26F12.1a,6239.Y57G11B.5	ddo-3,col-140,Y57G11B.5
5	STRING clusters	6239_CL:21097	Mostly uncharacterized, incl. chorion 2, and chitin metabolic process	2	29	2.15	0.0204	6239.F20H11.5,6239.Y57G11B.5	ddo-3,Y57G11B.5

## Sheet: Cdrosophilae
Trinity_name	protein.id	domain_summary_url	annotation	other_names_and_aliases	X.clustering.method	cluster.number	cluster.color	gene.count	protein.description
DF5112@@@TRINITY_DN11638_c0_g1_i1.p1	C34C12.8	GrpE protein homolog, mitochondrial; Essential component of the PAM complex, a complex required for the translocation of transit peptide-containing proteins from the inner membrane into the mitochondrial matrix in an ATP-dependent manner. Seems to control the nucleotide-dependent binding of mitochondrial HSP70 to substrate proteins (By similarity)	https://smart.embl.de/smart/DDvec.cgi?smart=237:Pfam_GrpE(61|236)+	175449,C34C12.8,CAA87101.1,CE03057,GRPE_CAEEL,GrpE protein homolog, mitochondrial,Molecular chaperone GrpE,NM_065312,NM_065312.4,NP_497713,NP_497713.1,Protein C34C12.8 (C34C12.8) mRNA, complete cds,Q18421,UPI000012BB18,WBGene00007927,cel:CELE_C34C12.8	MCL	1	Red	17	GrpE protein homolog, mitochondrial; Essential component of the PAM complex, a complex required for the translocation of transit peptide-containing proteins from the inner membrane into the mitochondrial matrix in an ATP-dependent manner. Seems to control the nucleotide-dependent binding of mitochondrial HSP70 to substrate proteins (By similarity)
DF5112@@@TRINITY_DN12577_c0_g1_i1.p1	F02E9.10	Uncharacterized protein; Protein F02E9.10, isoform a (F02E9.10) mRNA, complete cds	https://smart.embl.de/smart/DDvec.cgi?smart=455:WD40(129|187)+WD40(190|229)+WD40(241|282)+WD40(285|325)+	172630,A5Z2V7,A5Z2V7_CAEEL,CAC42275.1,CAI79161.1,CAN99681.1,CE27119,CE38314,CE41213,CELE_F02E9.10,Cel.7857,F02E9.10,F02E9.10a.1,F02E9.10a.2,F02E9.10b.1,F02E9.10b.2,F02E9.10c,F02E9.10c.1,F02E9.10c.2,NM_001025912,NM_001025912.3,NM_001025913,NM_001025913.3,NM_001128969,NM_001128969.2,NP_001021083,NP_001021083.1,NP_001021084,NP_001021084.1,NP_001122441,NP_001122441.1,Q564V0,Q95QM9,UPI000008270A,UPI00…	MCL	1	Red	17	Uncharacterized protein; Protein F02E9.10, isoform a (F02E9.10) mRNA, complete cds
DF5112@@@TRINITY_DN1258_c0_g1_i1.p1	F09E8.2	Protein disulfide isomerase crld-1; Protein F09E8.2, isoform a (F09E8.2) mRNA, complete cds	https://smart.embl.de/smart/DDvec.cgi?smart=356:SIGNAL(1|17)+Pfam_DUF3456(26|89)+Pfam_DUF3456(84|135)+EGF_like(144|188)+EGF_like(208|240)+EGF_CA(241|282)+TRANS(300|317)+TRANS(322|341)+	178267,5.3.4.1,A7LPH5,CAA98055.1,CAO82025.1,CE05579,CE41378,CELE_F09E8.2,CREL1_CAEEL,Cel.22762,Crld-1,EC 5.3.4.1,F09E8.2,F09E8.2a,F09E8.2b,NM_001129295,NM_001129295.2,NM_070129,NM_070129.5,NP_001122767,NP_001122767.1,NP_001370240,NP_502530,NP_502530.1,Protein disulfide isomerase crld-1,Protein disulfide-isomerase ,Q19267,Q19267_CAEEL,UPI000007C664,UPI0001596870,Uncharacterized protein,WBGene00008…	MCL	1	Red	17	Protein disulfide isomerase crld-1; Protein F09E8.2, isoform a (F09E8.2) mRNA, complete cds
DF5112@@@TRINITY_DN1585_c0_g1_i2.p2	T04A8.8	Rad60-SLD domain-containing protein; Protein T04A8.8 (T04A8.8) mRNA, complete cds	https://smart.embl.de/smart/DDvec.cgi?smart=328:Pfam_Rad60-SLD(250|328)+	259502,CAA84734.1,CE01077,CELE_T04A8.8,Cel.10098,NM_065559,NM_065559.5,NP_497960,NP_497960.1,Protein T04A8.8 (T04A8.8) mRNA, complete cds,Q22144,Q22144_CAEEL,Rad60-SLD domain-containing protein,T04A8.8,UPI0000061131,Uncharacterized protein,WBGene00011410,cel:CELE_T04A8.8	MCL	1	Red	17	Rad60-SLD domain-containing protein; Protein T04A8.8 (T04A8.8) mRNA, complete cds
DF5112@@@TRINITY_DN7253_c0_g1_i4.p1	W03F8.3	Probable peptide chain release factor 1, mitochondrial; Mitochondrial peptide chain release factor that directs the termination of translation in response to the peptide chain termination codons UAA and UAG	https://smart.embl.de/smart/DDvec.cgi?smart=389:PCRF(89|205)+Pfam_RF-1(235|345)+	177294,CCD65509.1,CE17273,MRF-1,MtRF-1,NM_068336,NM_068336.6,NP_001367563,NP_500737,NP_500737.1,O44568,Peptide chain release factor 1,Protein W03F8.3 (W03F8.3) mRNA, complete cds,RF1M_CAEEL,UPI000013371B,W03F8.3,W03F8.3a,WBGene00020993,cel:CELE_W03F8.3	MCL	1	Red	17	Probable peptide chain release factor 1, mitochondrial; Mitochondrial peptide chain release factor that directs the termination of translation in response to the peptide chain termination codons UAA and UAG
DF5112@@@TRINITY_DN3728_c0_g1_i1.p1	aos-1	Ubiquitin-like 1-activating enzyme e1 a; SUMO-activating enzyme subunit aos-1; The dimeric enzyme acts as an E1 ligase for smo-1. It mediates ATP-dependent activation of smo-1 and formation of a thioester with a conserved cysteine residue on uba-2 (Probable)	https://smart.embl.de/smart/DDvec.cgi?smart=343:Pfam_ThiF(11|340)+	179409,6.2.1.45,Aos-1,C08B6.9,CAA96591.1,CE05246,Cel.30581,EC 6.2.1.45,NM_073203,NM_073203.4,NP_505604,NP_505604.1,Protein AOS-1 (aos-1) mRNA, complete cds,Q17820,SAE1_CAEEL,SUMO-activating enzyme subunit aos-1,UPI0000078D8D,Ubiquitin-like 1-activating enzyme E1 A ,WBGene00000142,aos-1,cel:CELE_C08B6.9	MCL	1	Red	17	Ubiquitin-like 1-activating enzyme e1 a; SUMO-activating enzyme subunit aos-1; The dimeric enzyme acts as an E1 ligase for smo-1. It mediates ATP-dependent activation of smo-1 and formation of a thioester with a conserved cysteine residue on uba-2 (Probable)
DF5112@@@TRINITY_DN4385_c0_g1_i1.p1	cct-7	Chaperonin Containing TCP-1; Molecular chaperone; assists the folding of proteins upon ATP hydrolysis	https://smart.embl.de/smart/DDvec.cgi?smart=535:Pfam_Cpn60_TCP1(32|522)+	178670,CCD74224.1,CCD74225.1,CCT-eta,CE28255,CE33316,CELE_T10B5.5,Cct-7,Cel.17580,Chaperonin Containing TCP-1,NM_071121,NM_071121.4,NM_182379,NM_182379.3,NP_503522,NP_503522.1,NP_872179,NP_872179.1,Protein CCT-7, isoform a,Q86S29,Q9TZS5,Q9TZS5_CAEEL,T-complex protein 1 subunit eta,T10B5.5,T10B5.5a,T10B5.5b,T10B5.5b.1,TCP-1-eta,UPI0000002E1C,UPI0000074FE2,WBGene00020391,cct-7,cel:CELE_T10B5.5	MCL	1	Red	17	Chaperonin Containing TCP-1; Molecular chaperone; assists the folding of proteins upon ATP hydrolysis
DF5112@@@TRINITY_DN14285_c0_g1_i1.p1	crt-1	Calreticulin; Molecular calcium-binding chaperone promoting folding, oligomeric assembly and quality control in the ER via the calreticulin/calnexin cycle. This lectin may interact transiently with almost all of the monoglucosylated glycoproteins that are synthesized in the ER (By similarity); Belongs to the calreticulin family	https://smart.embl.de/smart/DDvec.cgi?smart=395:Pfam_Calreticulin(19|254)+Pfam_Calreticulin(251|327)+COIL(331|392)+	178997,CAA42159.1,CALR_CAEEL,CCD69629.1,CE21562,Calreticulin,Crt-1,NM_072174,NM_072174.3,NP_504575,NP_504575.1,P27798,Protein CRT-1 (crt-1) mRNA, complete cds,UPI000012849B,WBGene00000802,X59589,Y38A10A.5,Y38A10A.5.1,Y38A10A.5.2,cel:CELE_Y38A10A.5,crt-1	MCL	1	Red	17	Calreticulin; Molecular calcium-binding chaperone promoting folding, oligomeric assembly and quality control in the ER via the calreticulin/calnexin cycle. This lectin may interact transiently with almost all of the monoglucosylated glycoproteins that are synthesized in the ER (By similarity); Belongs to the calreticulin family
DF5112@@@TRINITY_DN11029_c0_g1_i1.p1	fars-1	Aa_trna_ligase_ii domain-containing protein; Phenylalanyl Amino-acyl tRNA Synthetase; Protein FARS-1, isoform a (fars-1) mRNA, complete cds	https://smart.embl.de/smart/DDvec.cgi?smart=552:Pfam_tRNA-synt_2d(265|544)+	172311,6.1.1.20,AA_TRNA_LIGASE_II domain-containing protein,CCD67614.1,CCD67615.1,CE13435,CE33173,CELE_T08B2.9,Cel.8418,EC 6.1.1.20,Fars-1,NM_059391,NM_059391.4,NM_182004,NM_182004.5,NP_491792,NP_491792.1,NP_871804,NP_871804.1,Phenylalanyl Amino-acyl tRNA Synthetase,Phenylalanyl-tRNA synthetase alpha chain ,Q86B36,Q9GYS8,Q9GYS8_CAEEL,T08B2.9,T08B2.9a,T08B2.9b.1,T08B2.9b.2,T08B2.9b.4,UPI000000C96C…	MCL	1	Red	17	Aa_trna_ligase_ii domain-containing protein; Phenylalanyl Amino-acyl tRNA Synthetase; Protein FARS-1, isoform a (fars-1) mRNA, complete cds
DF5112@@@TRINITY_DN854_c0_g1_i1.p1	hel-1	Spliceosome RNA helicase DDX39B homolog; Required for mRNA export out of the nucleus. May play a role in spliceosome assembly	https://smart.embl.de/smart/DDvec.cgi?smart=425:DEXDc(60|261)+HELICc(297|378)+	174333,3.6.4.13,AAB65852.1,ATP-dependent RNA helicase UAP56/SUB2 ,C26D10.2,C26D10.2a,C26D10.2b,CAA91120.1,CAD57690.1,CE03025,CE32593,Cel.23307,DEAD box protein UAP56,DX39B_CAEEL,EC 3.6.4.13,Hel-1,NM_001026814,NM_001026814.3,NM_001026815,NM_001026815.2,NP_001021985,NP_001021985.1,NP_001021986,NP_001021986.1,Q17323,Q18212,Q86GC6,Spliceosome RNA helicase DDX39B homolog,U08102,UPI0000060F12,UPI000006…	MCL	1	Red	17	Spliceosome RNA helicase DDX39B homolog; Required for mRNA export out of the nucleus. May play a role in spliceosome assembly
DF5112@@@TRINITY_DN4035_c0_g1_i1.p1	hsp-4	Endoplasmic reticulum chaperone bip homolog; Heat shock 70 kDa protein D; Probably plays a role in facilitating the assembly of multimeric protein complexes inside the ER	https://smart.embl.de/smart/DDvec.cgi?smart=657:SIGNAL(1|17)+Pfam_MreB_Mbl(142|407)+	174203,2OP6,3.6.4.10,AAA28076.1,BIBH_CAEEL,CCD63548.1,CE07244,Cel.38699,EC 3.6.4.10,Endoplasmic reticulum chaperone BiP ,Endoplasmic reticulum chaperone BiP homolog,F43E2.8,F43E2.8.1,F43E2.8.2,F43E2.8a,HSP7D_CAEEL,Heat shock 70 kDa protein D,Hsp-4,M28528,NM_063135,NM_063135.6,NP_001370395,NP_495536,NP_495536.1,O02085,P20163,Protein HSP-4 (hsp-4) mRNA, complete cds,UPI0000078906,WBGene00002008,cel…	MCL	1	Red	17	Endoplasmic reticulum chaperone bip homolog; Heat shock 70 kDa protein D; Probably plays a role in facilitating the assembly of multimeric protein complexes inside the ER
DF5112@@@TRINITY_DN14641_c0_g1_i1.p1	mrpl-39	Mitochondrial Ribosomal Protein, Large; Protein MRPL-39 (mrpl-39) mRNA, complete cds	http://smart.embl.de/smart/DDt.cgi?smart=295:	3565110,CCD70653.1,CE38646,CELE_Y46H3A.7,Cel.30069,Mitochondrial Ribosomal Protein, Large,Mrpl-39,NM_001029076,NM_001029076.4,NP_001024247,NP_001024247.1,Protein MRPL-39 (mrpl-39) mRNA, complete cds,Q4W5T0,Q4W5T0_CAEEL,UPI000051952C,WBGene00044344,Y46H3A.7,Y46H3A.7a,cel:CELE_Y46H3A.7,mrpl-39	MCL	1	Red	17	Mitochondrial Ribosomal Protein, Large; Protein MRPL-39 (mrpl-39) mRNA, complete cds
DF5112@@@TRINITY_DN2234_c0_g1_i2.p1	rpl-1	60S ribosomal protein L10a; Protein RPL-1, isoform a; Belongs to the universal ribosomal protein uL1 family	https://smart.embl.de/smart/DDvec.cgi?smart=216:Pfam_Ribosomal_L1(16|211)+	171853,60S ribosomal protein L10a,AJ270980,CAB65902.1,CCD73507.1,CCD73508.1,CE25552,CE28379,Cel.33592,Large subunit ribosomal protein L10Ae,NM_058660,NM_058660.5,NM_058661,NM_058661.6,NP_491061,NP_491061.1,NP_491062,NP_491062.1,NR_002353,NR_002353.1,NR_002354,NR_002354.1,Protein RPL-1, isoform a,Q95Y46,Q9N4I4,Q9U3B1,RL10A_CAEEL,Rpl-1,UPI000007CB2B,UPI000007EAB8,WBGene00004412,Y71F9AL.13,Y71F9AL.1…	MCL	1	Red	17	60S ribosomal protein L10a; Protein RPL-1, isoform a; Belongs to the universal ribosomal protein uL1 family
DF5112@@@TRINITY_DN10985_c0_g1_i1.p1	rpl-33	60S ribosomal protein L35a; Protein RPL-33 (rpl-33) mRNA, complete cds; Belongs to the eukaryotic ribosomal protein eL33 family	https://smart.embl.de/smart/DDvec.cgi?smart=124:Pfam_Ribosomal_L35Ae(18|118)+	174166,60S ribosomal protein L35a,CCD69169.1,CE04362,F10E7.7,F10E7.7.1,F10E7.7.2,Large subunit ribosomal protein L35Ae,NM_063067,NM_063067.3,NP_495468,NP_495468.1,P49180,Protein RPL-33 (rpl-33) mRNA, complete cds,RL35A_CAEEL,Rpl-33,UPI0000132FD2,WBGene00004447,cel:CELE_F10E7.7,rpl-33	MCL	1	Red	17	60S ribosomal protein L35a; Protein RPL-33 (rpl-33) mRNA, complete cds; Belongs to the eukaryotic ribosomal protein eL33 family
DF5112@@@TRINITY_DN5356_c0_g1_i1.p1	rpl-4	60S ribosomal protein L4; Protein RPL-4 (rpl-4) mRNA, complete cds; Belongs to the universal ribosomal protein uL4 family	https://smart.embl.de/smart/DDvec.cgi?smart=345:Pfam_Ribosomal_L4(21|262)+Pfam_Ribos_L4_asso_C(275|345)+	172074,60S ribosomal protein L4,B0041.4,B0041.4.1,CCD61249.1,CE07669,Cel.5071,FO080106,GO:0032502,Large subunit ribosomal protein L4e,NM_059015,NM_059015.4,NP_491416,NP_491416.1,O02056,Protein RPL-4 (rpl-4) mRNA, complete cds,RL4_CAEEL,Rpl-4,UPI0000060E5C,WBGene00004415,cel:CELE_B0041.4,rpl-4	MCL	1	Red	17	60S ribosomal protein L4; Protein RPL-4 (rpl-4) mRNA, complete cds; Belongs to the universal ribosomal protein uL4 family
DF5112@@@TRINITY_DN4139_c0_g1_i1.p1	rpn-8	Proteasome Regulatory Particle, Non-ATPase-like; Protein RPN-8 (rpn-8) mRNA, complete cds	https://smart.embl.de/smart/DDvec.cgi?smart=362:JAB_MPN(40|176)+Pfam_MitMem_reg(199|310)+	172009,26S proteasome regulatory subunit N8,CCD65169.1,CE18135,CELE_R12E2.3,M67.973,MPN domain-containing protein,NM_058918,NM_058918.5,NP_491319,NP_491319.1,O61792,O61792_CAEEL,Proteasome Regulatory Particle, Non-ATPase-like,Protein RPN-8 (rpn-8) mRNA, complete cds,R12E2.3,R12E2.3.1,Rpn-8,UPI000007D292,WBGene00004464,cel:CELE_R12E2.3,rpn-8	MCL	1	Red	17	Proteasome Regulatory Particle, Non-ATPase-like; Protein RPN-8 (rpn-8) mRNA, complete cds
DF5112@@@TRINITY_DN10156_c0_g1_i1.p1	rps-10	S10_plectin domain-containing protein; Ribosomal Protein, Small subunit; Protein RPS-10 (rps-10) mRNA, complete cds	https://smart.embl.de/smart/DDvec.cgi?smart=149:Pfam_S10_plectin(3|96)+	172061,CCD67317.1,CE09041,CELE_D1007.6,Cel.33728,D1007.6,D1007.6.1,D1007.6.2,NM_058997,NM_058997.4,NP_491398,NP_491398.1,O01869,O01869_CAEEL,Protein RPS-10 (rps-10) mRNA, complete cds,Ribosomal Protein, Small subunit,Rps-10,S10_plectin domain-containing protein,Small subunit ribosomal protein S10e,UPI0000060E78,WBGene00004479,cel:CELE_D1007.6,rps-10	MCL	1	Red	17	S10_plectin domain-containing protein; Ribosomal Protein, Small subunit; Protein RPS-10 (rps-10) mRNA, complete cds
DF5112@@@TRINITY_DN4477_c0_g1_i1.p1	B0035.15	Uncharacterized protein b0035.15; Protein B0035.15 (B0035.15) mRNA, complete cds	https://smart.embl.de/smart/DDvec.cgi?smart=283:Pfam_UPF0240(19|186)+COIL(224|282)+	178039,B0035.15,CAA97417.1,CE05170,Cel.20249,NM_069720,NM_069720.4,NP_502121,NP_502121.1,Protein B0035.15 (B0035.15) mRNA, complete cds,Q17439,UPI00000835C0,Uncharacterized protein,Uncharacterized protein B0035.15,WBGene00007113,YQVW_CAEEL,cel:CELE_B0035.15	MCL	2	Brown	6	Uncharacterized protein b0035.15; Protein B0035.15 (B0035.15) mRNA, complete cds
DF5112@@@TRINITY_DN9601_c0_g1_i1.p1	coq-8	Atypical kinase coq-8, mitochondrial; Atypical kinase involved in the biosynthesis of coenzyme Q, also named ubiquinone, an essential lipid-soluble electron transporter for aerobic cellular respiration. Its substrate specificity is unclear: either acts as protein kinase that phosphorylates other proteins in the CoQ complex to stabilize their interactions or acts as a small molecule kinase that ph…	https://smart.embl.de/smart/DDvec.cgi?smart=755:Pfam_ABC1(417|533)+	175647,2.7.-.-,AarF domain-containing kinase,Atypical kinase coq-8, mitochondrial,C35D10.4,CCD66776.1,CE32159,COQ8_CAEEL,Cel.5773,Coq-8,NM_065613,NM_065613.7,NP_498014,NP_498014.2,Protein COQ-8 (coq-8) mRNA, complete cds,Q18486,UPI0000001B32,Ubiquinone biosynthesis protein coq-8,WBGene00000767,cel:CELE_C35D10.4,coq-8	MCL	2	Brown	6	Atypical kinase coq-8, mitochondrial; Atypical kinase involved in the biosynthesis of coenzyme Q, also named ubiquinone, an essential lipid-soluble electron transporter for aerobic cellular respiration. Its substrate specificity is unclear: either acts as protein kinase that phosphorylates other proteins in the CoQ complex to stabilize their interactions or acts as a small molecule kinase that ph…
DF5112@@@TRINITY_DN884_c0_g1_i1.p1	idha-1	Probable isocitrate dehydrogenase [NAD] subunit alpha, mitochondrial; Protein IDHA-1 (idha-1) mRNA, complete cds; Belongs to the isocitrate and isopropylmalate dehydrogenases family	https://smart.embl.de/smart/DDvec.cgi?smart=358:Iso_dh(26|350)+	1.1.1.41,172655,CAB02111.2,CE34018,Cel.17675,Cel.34360,EC 1.1.1.41,F43G9.1,F43G9.1.1,IDH3A_CAEEL,Idha-1,Isocitrate dehydrogenase (NAD+) ,Isocitric dehydrogenase subunit alpha,NAD(+)-specific ICDH subunit alpha,NM_059929,NM_059929.3,NP_492330,NP_492330.2,Protein IDHA-1 (idha-1) mRNA, complete cds,Q93714,UPI000019B0C7,WBGene00009664,cel:CELE_F43G9.1,idha-1	MCL	2	Brown	6	Probable isocitrate dehydrogenase [NAD] subunit alpha, mitochondrial; Protein IDHA-1 (idha-1) mRNA, complete cds; Belongs to the isocitrate and isopropylmalate dehydrogenases family
DF5112@@@TRINITY_DN4765_c0_g1_i1.p1	nuaf-1	Nadh dehydrogenase [ubiquinone] 1 alpha subcomplex assembly factor 1; Probable complex I intermediate-associated protein 30, mitochondrial; Chaperone protein involved in the assembly of the mitochondrial NADH:ubiquinone oxidoreductase complex (complex I). Required for normal growth and reproduction	https://smart.embl.de/smart/DDvec.cgi?smart=340:Pfam_CIA30(137|310)+	183640,C50B8.3,CAB01129.1,CE08883,CIA30_CAEEL,Cel.35294,NADH ubiquinone oxidoreductase assembly factor 1,NM_073960,NM_073960.3,NP_506361,NP_506361.1,Nuaf-1,Protein NUAF-1 (nuaf-1) mRNA, complete cds,Q18726,UPI0000127984,WBGene00008225,cel:CELE_C50B8.3,nuaf-1	MCL	2	Brown	6	Nadh dehydrogenase [ubiquinone] 1 alpha subcomplex assembly factor 1; Probable complex I intermediate-associated protein 30, mitochondrial; Chaperone protein involved in the assembly of the mitochondrial NADH:ubiquinone oxidoreductase complex (complex I). Required for normal growth and reproduction
DF5112@@@TRINITY_DN10139_c0_g1_i1.p1	nuo-2	NADH Ubiquinone Oxidoreductase; Protein NUO-2, isoform a; Belongs to the complex I 30 kDa subunit family	https://smart.embl.de/smart/DDvec.cgi?smart=445:KH(2|74)+KH(79|155)+Pfam_Complex1_30kDa(260|382)+	172363,7.1.1.2,CCD68106.1,CCD68107.1,CE33179,CE37406,CELE_T10E9.7,Cel.16754,Complex1_30kDa domain-containing protein,EC 7.1.1.2,NADH Ubiquinone Oxidoreductase,NADH dehydrogenase (ubiquinone) Fe-S protein 3 ,NM_059480,NM_059480.3,NM_181996,NM_181996.3,NP_491881,NP_491881.2,NP_871796,NP_871796.1,Nuo-2,O01602,Protein NUO-2, isoform a,Q86NC2,Q86NC2_CAEEL,T10E9.7,T10E9.7a,T10E9.7b,UPI000000CABC,UPI000…	MCL	2	Brown	6	NADH Ubiquinone Oxidoreductase; Protein NUO-2, isoform a; Belongs to the complex I 30 kDa subunit family
DF5112@@@TRINITY_DN13385_c0_g1_i1.p1	ucr-1	Cytochrome b-c1 complex subunit 1, mitochondrial; Protein UCR-1 (ucr-1) mRNA, complete cds	https://smart.embl.de/smart/DDvec.cgi?smart=471:Pfam_Peptidase_M16(48|195)+Pfam_Peptidase_M16_C(200|386)+	175772,3.4.24.64,CCD63133.1,CE11226,Cel.39167,Cel.5626,Cytochrome b-c1 complex subunit 1, mitochondrial,EC 3.4.24.64,F56D2.1,F56D2.1a,FO080358,Mitochondrial-processing peptidase subunit beta ,NM_065801,NM_065801.6,NP_001343795,NP_498202,NP_498202.1,P98080,Protein UCR-1 (ucr-1) mRNA, complete cds,UCR1_CAEEL,UPI000013BA1F,Ucr-1,WBGene00018963,cel:CELE_F56D2.1,ucr-1	MCL	2	Brown	6	Cytochrome b-c1 complex subunit 1, mitochondrial; Protein UCR-1 (ucr-1) mRNA, complete cds
DF5112@@@TRINITY_DN14612_c0_g1_i1.p1	ech-5	Enoyl-CoA Hydratase; Protein ECH-5 (ech-5) mRNA, complete cds; Belongs to the enoyl-CoA hydratase/isomerase family	https://smart.embl.de/smart/DDvec.cgi?smart=287:Pfam_ECH_2(42|223)+	176908,4.2.1.18,CCD71953.1,CE46392,CELE_F56B3.5,Cel.12837,EC 4.2.1.18,Ech-5,Enoyl-CoA Hydratase,F56B3.5,Methylglutaconyl-CoA hydratase ,NM_067592,NM_067592.4,NP_499993,NP_499993.2,O45106,O45106_CAEEL,Protein ECH-5 (ech-5) mRNA, complete cds,UPI00022A9AE1,WBGene00001154,cel:CELE_F56B3.5,ech-5	MCL	3	Olive	3	Enoyl-CoA Hydratase; Protein ECH-5 (ech-5) mRNA, complete cds; Belongs to the enoyl-CoA hydratase/isomerase family
DF5112@@@TRINITY_DN6646_c0_g1_i1.p1	ech-8	3-hydroxyacyl-CoA dehydrogenase; Enoyl-CoA Hydratase; Protein ECH-8 (ech-8) mRNA, complete cds	https://smart.embl.de/smart/DDvec.cgi?smart=437:Pfam_3HCDH_N(41|220)+Pfam_3HCDH(223|310)+	1.1.1.35,177905,3-hydroxyacyl-CoA dehydrogenase ,CAB02891.2,CE35450,CELE_F01G10.2,Cel.13186,EC 1.1.1.35,Ech-8,Enoyl-CoA Hydratase,F01G10.2,NM_069475,NM_069475.3,NP_501876,NP_501876.2,O17761,O17761_CAEEL,Protein ECH-8 (ech-8) mRNA, complete cds,UPI00001C07A5,WBGene00001157,cel:CELE_F01G10.2,ech-8	MCL	3	Olive	3	3-hydroxyacyl-CoA dehydrogenase; Enoyl-CoA Hydratase; Protein ECH-8 (ech-8) mRNA, complete cds
DF5112@@@TRINITY_DN5821_c0_g1_i1.p1	prx-14	Pex14_N domain-containing protein; PeRoXisome assembly factor; Protein PRX-14 (prx-14) mRNA, complete cds	https://smart.embl.de/smart/DDvec.cgi?smart=258:Pfam_Pex14_N(10|69)+COIL(123|150)+	178026,CAB03225.1,CE12550,CELE_R07H5.1,NM_069696,NM_069696.4,NP_502097,NP_502097.1,PeRoXisome assembly factor,Peroxin-14,Pex14_N domain-containing protein,Protein PRX-14 (prx-14) mRNA, complete cds,Prx-14,Q93930,Q93930_CAEEL,R07H5.1,UPI00000819F0,WBGene00004199,cel:CELE_R07H5.1,prx-14	MCL	3	Olive	3	Pex14_N domain-containing protein; PeRoXisome assembly factor; Protein PRX-14 (prx-14) mRNA, complete cds
DF5112@@@TRINITY_DN9524_c0_g1_i1.p1	fkb-3	FK506-binding protein 9/10; Peptidylprolyl isomerase; Protein FKB-3 (fkb-3) mRNA, complete cds	https://smart.embl.de/smart/DDvec.cgi?smart=261:SIGNAL(1|16)+Pfam_FKBP_C(41|131)+Pfam_FKBP_C(159|251)+	179113,5.2.1.8,C05C8.3,CCD63089.1,CE07921,CELE_C05C8.3,Cel.3271,EC 5.2.1.8,FK506-binding protein 9/10 ,Fkb-3,NM_072434,NM_072434.3,NP_001367429,NP_504835,NP_504835.1,O16309,O16309_CAEEL,Peptidyl-prolyl cis-trans isomerase,Peptidylprolyl isomerase,Protein FKB-3 (fkb-3) mRNA, complete cds,UPI0000077302,WBGene00001428,cel:CELE_C05C8.3,fkb-3	MCL	4	Green	2	FK506-binding protein 9/10; Peptidylprolyl isomerase; Protein FKB-3 (fkb-3) mRNA, complete cds
DF5112@@@TRINITY_DN2665_c0_g2_i1.p1	noah-2	NOmpA Homolog (Drosophila nompA: no mechanoreceptor potential A); Protein NOAH-2 (noah-2) mRNA, complete cds	https://smart.embl.de/smart/DDvec.cgi?smart=741:SIGNAL(1|17)+PAN_AP(24|111)+PAN_AP(124|203)+PAN_AP(215|294)+PAN_AP(306|381)+ZP(391|637)+TRANS(705|727)+	178365,CAB05199.1,CE18723,CELE_F52B11.3,Cel.5884,F52B11.3,NM_070298,NM_070298.4,NP_502699,NP_502699.1,Noah-2,Protein NOAH-2 (noah-2) mRNA, complete cds,Q9XUE5,Q9XUE5_CAEEL,UPI000007B865,WBGene00009926,Z82268,cel:CELE_F52B11.3,noah-2	MCL	4	Green	2	NOmpA Homolog (Drosophila nompA: no mechanoreceptor potential A); Protein NOAH-2 (noah-2) mRNA, complete cds
DF5112@@@TRINITY_DN2179_c0_g1_i2.p1	cpg-4	Chondroitin proteoglycan 4; Protein CPG-4 (cpg-4) mRNA, complete cds	https://smart.embl.de/smart/DDvec.cgi?smart=782:SIGNAL(1|18)+Pfam_CPG4(135|231)+	178986,ABC65814.1,C10F3.1,CCD64120.1,CE08066,CPG4_CAEEL,Cel.24707,Chondroitin proteoglycan 4,Cpg-4,DQ340626,NM_072155,NM_072155.4,NP_504556,NP_504556.3,O16883,Protein CPG-4 (cpg-4) mRNA, complete cds,UPI0000164241,WBGene00015677,cel:CELE_C10F3.1,cpg-4	MCL	5	Blue	2	Chondroitin proteoglycan 4; Protein CPG-4 (cpg-4) mRNA, complete cds
DF5112@@@TRINITY_DN388_c0_g5_i1.p1	mex-5	Zinc finger protein mex-5; Functions with mex-6 to affect embryonic viability, establish soma germline asymmetry in embryos and establish plk-1, pie-1, mex-1, and pos-1 asymmetry in embryos. Also affects formation of intestinal cells	https://smart.embl.de/smart/DDvec.cgi?smart=468:ZnF_C3H1(270|298)+ZnF_C3H1(314|343)+	178296,CAB05310.1,CE21237,CHEMBL1293319,Cel.23008,MEX5_CAEEL,Mex-5,NM_070165,NM_070165.4,NP_502566,NP_502566.1,Protein MEX-5 (mex-5) mRNA, complete cds,Q9XUB2,UPI0000082DC6,W02A2.7,WBGene00003230,Zinc finger protein mex-5,cel:CELE_W02A2.7,mex-5	MCL	5	Blue	2	Zinc finger protein mex-5; Functions with mex-6 to affect embryonic viability, establish soma germline asymmetry in embryos and establish plk-1, pie-1, mex-1, and pos-1 asymmetry in embryos. Also affects formation of intestinal cells
DF5112@@@TRINITY_DN12385_c0_g1_i1.p1	cpl-1	CathePsin L family; Protein CPL-1, isoform a	https://smart.embl.de/smart/DDvec.cgi?smart=337:SIGNAL(1|18)+Inhibitor_I29(32|91)+Pept_C1(120|336)+	180111,3.4.22.15,C01.066,CAB07275.1,CCG28194.1,CE16333,CE47424,CELE_T03E6.7,CPL1_CAEEL,CathePsin L family,Cathepsin L ,Cathepsin L-like,Cel.17971,Cpl-1,EC 3.4.22.15,H9G333,NM_001269789,NM_001269789.1,NM_001269790,NM_001269790.1,NP_001256718,NP_001256718.1,NP_001256719,NP_001256719.1,O45734,O45734_CAEEL,Protein CPL-1, isoform a,T03E6.7,T03E6.7.1,T03E6.7a,T03E6.7b,T03E6.7b.1,T03E6.7b.2,UPI000007762…	MCL	6	Light Sky Blue	2	CathePsin L family; Protein CPL-1, isoform a
DF5112@@@TRINITY_DN12283_c0_g1_i1.p1	cpr-6	Cathepsin B-like cysteine proteinase 6; Protein CPR-6, isoform a (cpr-6) mRNA, complete cds; Belongs to the peptidase C1 family	https://smart.embl.de/smart/DDvec.cgi?smart=379:SIGNAL(1|16)+Pept_C1(105|356)+	180931,3.4.22.-,3.4.22.1,AAA98787.1,AAA98789.1,C01.A51,C25B8.3,C25B8.3a,C25B8.3b,C25B8.3c,CCD65628.1,CCD65629.1,CCD65637.1,CE04078,CE30876,CE41106,CPR6_CAEEL,Cathepsin B ,Cathepsin B-like cysteine proteinase 6,Cel.18138,Cpr-6,Cysteine protease-related 6,EC 3.4.22.1,G8JY40,L39894,L39939,NM_001029255,NM_001029255.2,NM_001129641,NM_001129641.3,NM_171708,NM_171708.6,NP_001024426,NP_001024426.1,NP_001…	MCL	6	Light Sky Blue	2	Cathepsin B-like cysteine proteinase 6; Protein CPR-6, isoform a (cpr-6) mRNA, complete cds; Belongs to the peptidase C1 family
DF5112@@@TRINITY_DN5416_c0_g1_i1.p1	T04F3.3	Uncharacterized protein; Protein T04F3.3 (T04F3.3) mRNA, complete cds	https://smart.embl.de/smart/DDvec.cgi?smart=364:PTPc(62|337)+	188063,CAA96670.2,CE42159,CELE_T04F3.3,NM_073564,NM_073564.2,NP_505965,NP_505965.2,Protein T04F3.3 (T04F3.3) mRNA, complete cds,Q22158,Q22158_CAEEL,T04F3.3,UPI000163FF18,Uncharacterized protein,WBGene00011438,cel:CELE_T04F3.3	MCL	7	Medium Blue	2	Uncharacterized protein; Protein T04F3.3 (T04F3.3) mRNA, complete cds
DF5112@@@TRINITY_DN9765_c0_g1_i1.p1	ZK265.3	Uncharacterized protein; Protein ZK265.3 (ZK265.3) mRNA, complete cds	https://smart.embl.de/smart/DDvec.cgi?smart=340:Pfam_MFP2b(6|339)+	191276,CAB03515.1,CE15293,CELE_ZK265.3,Cel.16149,NM_059843,NM_059843.4,NP_492244,NP_492244.1,Protein ZK265.3 (ZK265.3) mRNA, complete cds,Q94401,Q94401_CAEEL,UPI00000761A1,Uncharacterized protein,WBGene00013956,ZK265.3,cel:CELE_ZK265.3	MCL	7	Medium Blue	2	Uncharacterized protein; Protein ZK265.3 (ZK265.3) mRNA, complete cds
DF5112@@@TRINITY_DN13545_c0_g1_i1.p1	C05C8.7	Mannose-6-phosphate isomerase; Protein C05C8.7 (C05C8.7) mRNA, complete cds	https://smart.embl.de/smart/DDvec.cgi?smart=467:Pfam_PMI_typeI(1|386)+	179120,5.3.1.8,C05C8.7,C05C8.7.1,C05C8.7.2,C05C8.7.3,C05C8.7.4,CCD63093.1,CE07925,CELE_C05C8.7,Cel.17708,EC 5.3.1.8,Mannose-6-phosphate isomerase ,NM_072442,NM_072442.3,NP_504843,NP_504843.1,O16315,O16315_CAEEL,Protein C05C8.7 (C05C8.7) mRNA, complete cds,UPI000007A47C,Uncharacterized protein,WBGene00015464,cel:CELE_C05C8.7
DF5112@@@TRINITY_DN11279_c0_g1_i1.p1	C16C10.4	Probable histone deacetylase complex subunit SAP18; Acts in transcription repression. Involved in the tethering of the SIN3 complex to core histone proteins (By similarity)	https://smart.embl.de/smart/DDvec.cgi?smart=166:Pfam_SAP18(17|137)+	175534,18 kDa Sin3-associated polypeptide,C16C10.4,C16C10.4.1,C16C10.4.2,C16C10.4.3,CAA86742.1,CE01495,CELE_C16C10.4,Histone deacetylase complex subunit SAP18,NM_065432,NM_065432.4,NP_497833,NP_497833.1,Protein C16C10.4 (C16C10.4) mRNA, complete cds,Q09250,SAP18_CAEEL,UPI0000060EF7,WBGene00007625,cel:CELE_C16C10.4
DF5112@@@TRINITY_DN880_c0_g1_i2.p1	C23H3.2	Uncharacterized protein; Protein C23H3.2, isoform a	https://smart.embl.de/smart/DDvec.cgi?smart=349:TRANS(75|97)+TRANS(164|186)+TRANS(198|220)+TRANS(286|308)+	173390,C23H3.2,C23H3.2a,C23H3.2a.1,C23H3.2a.2,C23H3.2b.1,C23H3.2b.2,CCD65321.1,CCD65322.1,CE08321,CE27078,CELE_C23H3.2,H2KYX4,H2KYX4_CAEEL,NM_061250,NM_061250.5,NM_182217,NM_182217.3,NP_493651,NP_493651.1,NP_872017,NP_872017.1,Protein C23H3.2, isoform a,Q8IFY5,UPI0000076773,UPI0000085210,Uncharacterized protein,WBGene00016018,cel:CELE_C23H3.2
DF5112@@@TRINITY_DN14283_c0_g1_i1.p1	C24F3.2	Dual specificity phosphatase 12; Protein C24F3.2 (C24F3.2) mRNA, complete cds	https://smart.embl.de/smart/DDvec.cgi?smart=272:DSPc(1|145)+	177903,3.1.3.16,3.1.3.48,AL022716,C24F3.2,CAA18771.1,CE18519,CELE_C24F3.2,Cel.13489,Dual specificity phosphatase 12 ,EC 3.1.3.16,EC 3.1.3.48,NM_069469,NM_069469.5,NP_501870,NP_501870.1,Protein C24F3.2 (C24F3.2) mRNA, complete cds,Q9XXK8,Q9XXK8_CAEEL,UPI000007DABA,Uncharacterized protein,WBGene00007697,cel:CELE_C24F3.2
DF5112@@@TRINITY_DN11406_c0_g1_i1.p1	C29G2.6	Uncharacterized protein c29g2.6; Protein C29G2.6 (C29G2.6) mRNA, complete cds	https://smart.embl.de/smart/DDvec.cgi?smart=202:SIGNAL(1|19)+Pfam_DUF5332(43|192)+	183035,C29G2.6,CCD66095.1,CE08467,Cel.20635,NM_071307,NM_071307.6,NP_503708,NP_503708.1,O16887,Protein C29G2.6 (C29G2.6) mRNA, complete cds,UPI000007BDC6,Uncharacterized protein,Uncharacterized protein C29G2.6,WBGene00016234,YCTG2_CAEEL,cel:CELE_C29G2.6
DF5112@@@TRINITY_DN3200_c0_g1_i1.p1	C35D10.6	Aldo_ket_red domain-containing protein; Protein C35D10.6 (C35D10.6) mRNA, complete cds	https://smart.embl.de/smart/DDvec.cgi?smart=287:Pfam_Aldo_ket_red(13|274)+	175645,Aldo_ket_red domain-containing protein,C35D10.6,CCD66777.1,CE01200,CELE_C35D10.6,Cel.10748,NM_065610,NM_065610.3,NP_498011,NP_498011.1,Protein C35D10.6 (C35D10.6) mRNA, complete cds,Q18483,Q18483_CAEEL,UPI0000082E87,Uncharacterized protein,WBGene00016443,cel:CELE_C35D10.6
DF5112@@@TRINITY_DN274_c0_g1_i4.p1	C50D2.8	LUC7 related splicing factor homolog; Protein C50D2.8 (C50D2.8) mRNA, complete cds	https://smart.embl.de/smart/DDvec.cgi?smart=319:Pfam_LUC7(5|263)+	183652,C50D2.8,C50D2.8a,CCD65340.1,CE34769,CELE_C50D2.8,LUC7 related splicing factor homolog,Luc-7L3,NM_061257,NM_061257.3,NP_001367546,NP_493658,NP_493658.2,Protein C50D2.8 (C50D2.8) mRNA, complete cds,Q8ITY5,Q8ITY5_CAEEL,UPI00001B4CEE,Uncharacterized protein,WBGene00016811,cel:CELE_C50D2.8
DF5112@@@TRINITY_DN2427_c0_g1_i1.p1	D2045.9	Collagen beta-1,o-galactosyltransferase; Protein D2045.9 (D2045.9) mRNA, complete cds	https://smart.embl.de/smart/DDvec.cgi?smart=534:SIGNAL(1|19)+Pfam_Glyco_transf_25(289|473)+	2.4.1.50,3565069,CAA84699.2,CE33988,CELE_D2045.9,Cel.23068,Cel.33413,Collagen beta-1,O-galactosyltransferase ,D2045.9,EC 2.4.1.50,NM_001026062,NM_001026062.3,NP_001021233,NP_001021233.1,Protein D2045.9 (D2045.9) mRNA, complete cds,Q18989,Q18989_CAEEL,UPI0000192787,Uncharacterized protein,WBGene00008426,cel:CELE_D2045.9
DF5112@@@TRINITY_DN2346_c0_g1_i2.p1	F09E5.8	Pyridoxal phosphate homeostasis protein; Pyridoxal 5'-phosphate (PLP)-binding protein, which may be involved in intracellular homeostatic regulation of pyridoxal 5'-phosphate (PLP), the active form of vitamin B6	https://smart.embl.de/smart/DDvec.cgi?smart=244:Pfam_Ala_racemase_N(15|240)+	173906,CCD68760.1,CE02615,F09E5.8,NM_062600,NM_062600.5,NP_495001,NP_495001.1,P52057,PLP dependent protein,PLP homeostasis protein,PLPHP_CAEEL,Protein F09E5.8 (F09E5.8) mRNA, complete cds,Pyridoxal phosphate homeostasis protein,UPI000013C17A,WBGene00017286,cel:CELE_F09E5.8
DF5112@@@TRINITY_DN853_c0_g1_i1.p1	F22D6.2	Uncharacterized protein; Protein F22D6.2 (F22D6.2) mRNA, complete cds	https://smart.embl.de/smart/DDvec.cgi?smart=189:ZnF_A20(11|35)+ZnF_AN1(130|167)+	172441,CAA95809.1,CE05683,CELE_F22D6.2,F22D6.2,F22D6.2.1,F22D6.2.2,NM_059604,NM_059604.5,NP_001369930,NP_492005,NP_492005.1,Protein F22D6.2 (F22D6.2) mRNA, complete cds,Q19723,Q19723_CAEEL,UPI000007F768,Uncharacterized protein,WBGene00009050,cel:CELE_F22D6.2
DF5112@@@TRINITY_DN4508_c0_g3_i2.p1	F23F1.5	Snurportin-1; Functions as an U snRNP-specific nuclear import adapter. Involved in the trimethylguanosine (m3G)-cap-dependent nuclear import of U snRNPs. Binds specifically to the terminal m3G-cap U snRNAs	https://smart.embl.de/smart/DDvec.cgi?smart=322:Pfam_Snurportin1(26|66)+	173383,CCD62354.1,CE09605,CELE_F23F1.5,F23F1.5,NM_061238,NM_061238.1,NP_493639,NP_493639.1,O17066,O17066_CAEEL,Protein F23F1.5 (F23F1.5) mRNA, complete cds,RNA U transporter 1,Snurportin-1,UPI000007B1BF,WBGene00017746,cel:CELE_F23F1.5
DF5112@@@TRINITY_DN7_c0_g2_i1.p1	F25B5.5	CDK5RAP1-like protein; Potential regulator of CDK5 activity	https://smart.embl.de/smart/DDvec.cgi?smart=547:Pfam_UPF0004(80|178)+Elp3(222|464)+Pfam_TRAM(478|542)+	175841,CCD68781.1,CDK5RAP1-like protein,CE01922,CK5P1_CAEEL,Cel.37528,F25B5.5,NM_065889,NM_065889.5,NP_498290,NP_498290.1,Protein F25B5.5 (F25B5.5) mRNA, complete cds,Q09316,UPI0000060FD3,WBGene00017776,cel:CELE_F25B5.5
DF5112@@@TRINITY_DN12039_c0_g1_i1.p1	F53B3.6	Uncharacterized protein; Protein F53B3.6 (F53B3.6) mRNA, complete cds	http://smart.embl.de/smart/DDt.cgi?smart=321:	180576,CCD61863.1,CE04446,CELE_F53B3.6,Cel.23527,F53B3.6,NM_076095,NM_076095.5,NP_508496,NP_508496.1,Protein F53B3.6 (F53B3.6) mRNA, complete cds,Q20711,Q20711_CAEEL,UPI000007EEBD,Uncharacterized protein,WBGene00018744,cel:CELE_F53B3.6
DF5112@@@TRINITY_DN1457_c0_g1_i1.p1	F55C12.5	Smp-ltd domain-containing protein; Protein F55C12.5, isoform c	https://smart.embl.de/smart/DDvec.cgi?smart=925:TRANS(225|247)+PH(305|519)+	173997,CCD71873.1,CCD71874.1,CCD71875.1,CE28453,CE28454,CE31960,CELE_F55C12.5,Cel.16908,Cel.33308,F55C12.5,F55C12.5a,F55C12.5b,F55C12.5c,H2L079,H2L080,H2L080_CAEEL,NM_062770,NM_062770.4,NM_062771,NM_062771.1,NM_182235,NM_182235.4,NP_495171,NP_495171.1,NP_495172,NP_495172.1,NP_872035,NP_872035.1,Protein F55C12.5, isoform c,Q8IG16,SMP-LTD domain-containing protein,UPI0000081543,UPI00000832AB,UPI000…
DF5112@@@TRINITY_DN2182_c0_g1_i5.p1	F55F8.9	Zrt (ZRT), Irt-(IRT-) like Protein Transporter; Protein F55F8.9, isoform a (F55F8.9) mRNA, complete cds	https://smart.embl.de/smart/DDvec.cgi?smart=468:Pfam_Zip(4|439)+	172230,CCD71891.1,CCD71892.1,CE44985,CE45001,CELE_F55F8.9,Cel.18622,Cel.39955,F55F8.9,F55F8.9a,F55F8.9b,G4SKK4,NM_001263042,NM_001263042.1,NM_001263043,NM_001263043.1,NP_001249971,NP_001249971.1,NP_001249972,NP_001249972.1,P91348,P91348_CAEEL,UPI0001F7799F,UPI0001F779A0,WBGene00018897,Zrt (ZRT), Irt-(IRT-) like Protein Transporter,zipt-2.4
DF5112@@@TRINITY_DN5647_c0_g1_i1.p1	M01F1.4	Uncharacterized protein; Protein M01F1.4, isoform b (M01F1.4) mRNA, complete cds	https://smart.embl.de/smart/DDvec.cgi?smart=808:TRANS(24|46)+TRANS(50|69)+TRANS(120|142)+TRANS(157|179)+TRANS(191|210)+TRANS(214|236)+TRANS(311|333)+TRANS(397|419)+TRANS(564|586)+TRANS(596|613)+TRANS(652|674)+TRANS(689|711)+TRANS(718|740)+TRANS(763|785)+	175457,CAA86517.2,CAI58660.1,CE28063,CE38090,CELE_M01F1.4,Cel.6419,M01F1.4,M01F1.4a,M01F1.4b,NM_001027515,NM_001027515.4,NM_001027516,NM_001027516.1,NP_001022686,NP_001022686.1,NP_001022687,NP_001022687.1,Q21453,Q21453_CAEEL,Q5CZ47,UPI000007C099,UPI00004B74C5,Uncharacterized protein,WBGene00010810,cel:CELE_M01F1.4
DF5112@@@TRINITY_DN12084_c0_g1_i1.p1	R08D7.4	Uncharacterized protein r08d7.4; Protein R08D7.4, isoform a	https://smart.embl.de/smart/DDvec.cgi?smart=371:Pfam_MTS(172|254)+	176269,B2MZB2,CAA78050.3,CAQ48396.1,CE33291,CE41439,NM_001136368,NM_001136368.2,NM_066584,NM_066584.8,NP_001129840,NP_001129840.1,NP_498985,NP_498985.3,P30643,Protein R08D7.4, isoform a,R08D7.4,R08D7.4.1,R08D7.4a,R08D7.4a.1,R08D7.4a.2,R08D7.4b.1,R08D7.4b.2,UPI000000CA61,UPI0001596840,Uncharacterized protein R08D7.4,WBGene00011144,YNE4_CAEEL
DF5112@@@TRINITY_DN7648_c0_g1_i1.p1	R09F10.5	Uncharacterized protein; Protein R09F10.5 (R09F10.5) mRNA, complete cds	https://smart.embl.de/smart/DDvec.cgi?smart=145:SIGNAL(1|26)+TRANS(125|144)+	187750,CCD69418.1,CE07439,CELE_R09F10.5,Cel.485,NM_077003,NM_077003.1,NP_509404,NP_509404.1,Protein R09F10.5 (R09F10.5) mRNA, complete cds,Q23028,Q23028_CAEEL,R09F10.5,UPI000007798D,Uncharacterized protein,WBGene00019988,cel:CELE_R09F10.5
DF5112@@@TRINITY_DN1203_c0_g1_i7.p1	T10B11.6	Uncharacterized protein; Protein T10B11.6 (T10B11.6) mRNA, complete cds	https://smart.embl.de/smart/DDvec.cgi?smart=325:Pfam_DUF829(69|317)+	172424,CCD66244.1,CE18245,CELE_T10B11.6,NM_059579,NM_059579.4,NP_491980,NP_491980.1,Protein T10B11.6 (T10B11.6) mRNA, complete cds,Q9TZH8,Q9TZH8_CAEEL,T10B11.6,T10B11.6.1,T10B11.6.2,UPI000007A63B,Uncharacterized protein,WBGene00020402,cel:CELE_T10B11.6
DF5112@@@TRINITY_DN1767_c0_g1_i1.p1	T10G3.3	Uncharacterized protein; Protein T10G3.3 (T10G3.3) mRNA, complete cds	http://smart.embl.de/smart/DDt.cgi?smart=297:	179831,CAB03326.3,CE37988,CELE_T10G3.3,Cel.2348,NM_073945,NM_073945.5,NP_506346,NP_506346.2,P92020,P92020_CAEEL,Protein T10G3.3 (T10G3.3) mRNA, complete cds,T10G3.3,T10G3.3.1,UPI00004C4D8D,Uncharacterized protein,WBGene00011694,Z81118,cel:CELE_T10G3.3
DF5112@@@TRINITY_DN10365_c0_g1_i1.p1	T20D3.5	Uncharacterized protein; Protein T20D3.5 (T20D3.5) mRNA, complete cds; Belongs to the mitochondrial carrier (TC 2.A.29) family	https://smart.embl.de/smart/DDvec.cgi?smart=221:Pfam_Mito_carr(30|117)+Pfam_Mito_carr(128|220)+	177763,CAA92487.1,CE03673,CELE_T20D3.5,Cel.39365,NM_069241,NM_069241.3,NP_501642,NP_501642.1,O01256,O01256_CAEEL,Protein T20D3.5 (T20D3.5) mRNA, complete cds,T20D3.5,T20D3.5b,UPI000007583C,Uncharacterized protein,WBGene00011858,cel:CELE_T20D3.5
DF5112@@@TRINITY_DN10864_c0_g1_i1.p1	T25B9.9	6-phosphogluconate dehydrogenase, decarboxylating; Catalyzes the oxidative decarboxylation of 6- phosphogluconate to ribulose 5-phosphate and CO(2), with concomitant reduction of NADP to NADPH; Belongs to the 6-phosphogluconate dehydrogenase family	https://smart.embl.de/smart/DDvec.cgi?smart=484:Pfam_NAD_binding_2(5|174)+6PGD(179|471)+	1.1.1.343,1.1.1.44,177971,6-phosphogluconate dehydrogenase ,6PGD_CAEEL,CAA94380.1,CE06508,Cel.6711,EC 1.1.1.343,EC 1.1.1.44,NM_069597,NM_069597.5,NP_501998,NP_501998.1,Protein T25B9.9,Q17761,Q22772,T25B9.9,T25B9.9.1,UPI000007EB8B,WBGene00012015,cel:CELE_T25B9.9
DF5112@@@TRINITY_DN2335_c0_g1_i1.p1	W02D7.4	Uncharacterized protein; Protein W02D7.4 (W02D7.4) mRNA, complete cds	http://smart.embl.de/smart/DDt.cgi?smart=232:	189116,CCD69834.1,CE14442,CELE_W02D7.4,Cel.2051,FO081199,NM_072741,NM_072741.1,NP_505142,NP_505142.1,O17525,O17525_CAEEL,Protein W02D7.4 (W02D7.4) mRNA, complete cds,UPI000007A2E3,Uncharacterized protein,W02D7.4,WBGene00020940,cel:CELE_W02D7.4
DF5112@@@TRINITY_DN12253_c0_g1_i1.p1	Y116A8C.10	Uncharacterized protein; Protein Y116A8C.10, isoform b (Y116A8C.10) mRNA, complete cds	https://smart.embl.de/smart/DDvec.cgi?smart=248:Pfam_Ras(10|169)+	3565140,CAB55148.2,CE39644,CELE_Y116A8C.10,Cel.25050,Cel.39530,D0FK02,D0FK02_CAEEL,NM_001129332,NM_001129332.2,NP_001122804,NP_001122804.1,NR_003159,NR_003159.1,Rab-like protein 3,UPI00006839B2,Uncharacterized protein,WBGene00013790,Y116A8C.10,Y116A8C.10a,Y116A8C.10b,Y116A8C.10b.1,Y116A8C.10b.2,cel:CELE_Y116A8C.10
DF5112@@@TRINITY_DN2956_c0_g1_i1.p2	Y18H1A.4	Uncharacterized protein; Protein Y18H1A.4 (Y18H1A.4) mRNA, complete cds	https://smart.embl.de/smart/DDvec.cgi?smart=220:PGAM(8|173)+	171661,CCD73406.1,CE29367,CELE_Y18H1A.4,Cel.16537,NM_058369,NM_058369.7,NP_490770,NP_490770.1,Protein Y18H1A.4 (Y18H1A.4) mRNA, complete cds,Q9BL94,Q9BL94_CAEEL,UPI0000055FF3,Uncharacterized protein,WBGene00021210,Y18H1A.4,Y18H1A.4.1,Y18H1A.4.2,cel:CELE_Y18H1A.4
DF5112@@@TRINITY_DN12344_c0_g1_i1.p1	Y4C6B.7	Uncharacterized protein; Protein Y4C6B.7 (Y4C6B.7) mRNA, complete cds	https://smart.embl.de/smart/DDvec.cgi?smart=162:SIGNAL(1|19)+	3565268,CCD71129.1,CE41723,CELE_Y4C6B.7,Cel.24524,NM_001028309,NM_001028309.4,NP_001023480,NP_001023480.2,Protein Y4C6B.7 (Y4C6B.7) mRNA, complete cds,Q7YZG3,Q7YZG3_CAEEL,UPI00015E1CDA,Uncharacterized protein,WBGene00021161,Y4C6B.7,Y4C6B.7a,cel:CELE_Y4C6B.7
DF5112@@@TRINITY_DN5434_c0_g1_i2.p1	Y54G2A.2	ATLastiN (Endoplasmic reticulum GTPase) related; Protein Y54G2A.2, isoform a	https://smart.embl.de/smart/DDvec.cgi?smart=573:Pfam_GBP(43|325)+Pfam_GBP_C(327|454)+TRANS(483|505)+	177059,3.6.5.-,4D561,AAG50213.1,AF303255,ATLastiN (Endoplasmic reticulum GTPase) related,Atlastin ,Atln-1,CCD83487.1,CCD83488.1,CE26776,CE37292,CE48618,CE48868,CELE_Y54G2A.2,Cel.19424,EC 3.6.5.-,GB1/RHD3-type G domain-containing protein,NM_001028321,NM_001028321.2,NM_001028322,NM_001028322.3,NP_001023492,NP_001023492.1,NP_001023493,NP_001023493.1,Protein Y54G2A.2, isoform a,Putative guanylate-bin…
DF5112@@@TRINITY_DN745_c1_g1_i3.p1	Y55D5A.3	N-acylethanolamine-hydrolyzing acid amidase subunit beta; Protein Y55D5A.3 (Y55D5A.3) mRNA, complete cds	https://smart.embl.de/smart/DDvec.cgi?smart=355:SIGNAL(1|17)+Pfam_NAAA-beta(20|78)+Pfam_CBAH(122|308)+	190304,3.5.1.-,3.5.1.60,6DY3,C89.002,CCD72199.1,CE27498,CELE_Y55D5A.3,Cel.25356,EC 3.5.1.-,N-acylethanolamine-hydrolysing acid amidase ,N-acylethanolamine-hydrolyzing acid amidase,NAAA_CAEEL,NM_065246,NM_065246.1,NP_497647,NP_497647.1,Protein Y55D5A.3 (Y55D5A.3) mRNA, complete cds,Q9GUI1,Q9GUI1_CAEEL,UPI0000082AB2,Uncharacterized protein,WBGene00021917,Y55D5A.3,cel:CELE_Y55D5A.3
DF5112@@@TRINITY_DN5362_c0_g1_i1.p1	Y62E10A.13	Phosphoserine phosphatase; Protein Y62E10A.13, isoform c	https://smart.embl.de/smart/DDvec.cgi?smart=279:SIGNAL(1|28)+Pfam_HAD(59|233)+	178304,3.1.3.3,CAB60607.2,CAB60608.2,CAC42380.2,CBK19509.1,CE39452,CE39453,CE39454,CE44613,CELE_Y62E10A.13,Cel.22738,D3NQB6,EC 3.1.3.3,NM_070179,NM_070179.5,NM_070180,NM_070180.2,NM_070181,NM_070181.5,NP_502580,NP_502580.2,NP_502581,NP_502581.2,NP_502582,NP_502582.2,Phosphoserine phosphatase ,Protein Y62E10A.13, isoform c,Q95Q10,Q9U1W6,Q9U1W7,Q9U1W7_CAEEL,UPI00004B8444,UPI00005FE89C,UPI00005FE89D…
DF5112@@@TRINITY_DN2909_c0_g1_i1.p1	ZK353.9	Pith domain-containing protein zk353.9; Protein ZK353.9 (ZK353.9) mRNA, complete cds; Belongs to the PITHD1 family	https://smart.embl.de/smart/DDvec.cgi?smart=208:Pfam_PITH(28|172)+	191290,CCD73208.1,CE25685,NM_066458,NM_066458.6,NP_498859,NP_498859.1,PITH domain-containing protein ZK353.9,PITH1_CAEEL,Protein ZK353.9 (ZK353.9) mRNA, complete cds,Q95ZI6,UPI000013BC95,WBGene00022704,ZK353.9,cel:CELE_ZK353.9
DF5112@@@TRINITY_DN6166_c0_g1_i1.p1	acbp-5	Acyl-coenzyme a binding protein; Protein ACBP-5 (acbp-5) mRNA, complete cds	https://smart.embl.de/smart/DDvec.cgi?smart=274:Pfam_ACBP(29|110)+ANK(189|218)+ANK(222|251)+	176800,Acbp-5,Acyl-CoA-binding protein homolog 5,Acyl-Coenzyme A Binding Protein,CAB03343.2,CE37145,CELE_T12D8.3,Cel.10051,NM_067416,NM_067416.4,NP_499817,NP_499817.2,Protein ACBP-5 (acbp-5) mRNA, complete cds,Q9XVJ0,Q9XVJ0_CAEEL,T12D8.3,UPI0000403102,WBGene00011731,acbp-5,cel:CELE_T12D8.3
DF5112@@@TRINITY_DN1336_c1_g1_i1.p1	acs-4	Fatty Acid CoA Synthetase family; Protein ACS-4 (acs-4) mRNA, complete cds	https://smart.embl.de/smart/DDvec.cgi?smart=731:Pfam_AMP-binding(118|594)+Pfam_AMP-binding_C(603|700)+	176005,6.2.1.3,Acs-4,CCD70738.1,CE29312,CELE_F37C12.7,Cel.5646,EC 6.2.1.3,F37C12.7,FO081316,Fatty Acid CoA Synthetase family,Long-chain acyl-CoA synthetase ,NM_066167,NM_066167.5,NP_498568,NP_498568.1,Protein ACS-4 (acs-4) mRNA, complete cds,Q20121,Q20121_CAEEL,UPI0000079823,WBGene00018152,acs-4,cel:CELE_F37C12.7,long-chain-fatty-acid-CoA ligase
DF5112@@@TRINITY_DN3832_c0_g1_i1.p1	cah-4	Alpha-carbonic anhydrase domain-containing protein; Carbonic AnHydrase; Protein CAH-4, isoform a (cah-4) mRNA, complete cds	https://smart.embl.de/smart/DDvec.cgi?smart=280:Carb_anhydrase(30|278)+	181478,CAA92190.2,CAD18873.1,CE29433,CE29434,CELE_R01E6.3,Cah-4,Carbonic AnHydrase,Cel.33556,Cel.617,NM_077863,NM_077863.6,NM_077864,NM_077864.3,NP_510264,NP_510264.1,NP_510265,NP_510265.1,Putative carbonic anhydrase 4,Q21614,Q21614_CAEEL,Q8WQD8,R01E6.3,R01E6.3a,R01E6.3b,UPI000007487B,UPI0000081D9E,WBGene00000282,cah-4,cel:CELE_R01E6.3
DF5112@@@TRINITY_DN3082_c0_g1_i1.p1	cor-1	Coronin-like protein cor-1; Required to direct the migration of Q neuroblasts along the anterior axis of the body during larval development. This is dependent on its asymmetric expression in Q neuroblasts; Belongs to the WD repeat coronin family	https://smart.embl.de/smart/DDvec.cgi?smart=607:DUF1899(3|66)+WD40(67|108)+WD40(118|158)+WD40(161|200)+DUF1900(253|388)+COIL(566|604)+	176440,CAA83461.1,CAD27604.1,CAD27605.1,CAD27606.1,CE00590,CE30350,CE30351,CE30352,CORO_CAEEL,Cel.5461,Cor-1,Coronin-1B/1C/6,Coronin-like protein cor-1,NM_171226,NM_171226.3,NM_171227,NM_171227.3,NM_171892,NM_171892.5,NM_171893,NM_171893.3,NP_741268,NP_741268.1,NP_741269,NP_741269.1,NP_741270,NP_741270.1,NP_741271,NP_741271.1,Q21624,Q8T3D5,Q8T3D6,Q8T3D7,R01H10.3,R01H10.3a,R01H10.3b,R01H10.3c,R01H…
DF5112@@@TRINITY_DN14395_c0_g1_i1.p1	cpt-2	Calponin-homology (ch) domain-containing protein; Carnitine Palmitoyl Transferase; Protein CPT-2, isoform a	https://smart.embl.de/smart/DDvec.cgi?smart=646:CH(339|472)+	178025,2.3.1.21,CAB03233.2,CAJ90502.2,CE47933,CE47988,CELE_R07H5.2,Calponin-homology (CH) domain-containing protein,Carnitine O-palmitoyltransferase 2 ,Carnitine Palmitoyl Transferase,Cel.17129,Cpt-2,EC 2.3.1.21,G5ECS9,G5ECS9_CAEEL,G5EFE6,NM_001047512,NM_001047512.3,NM_001047513,NM_001047513.3,NP_001040977,NP_001040977.2,NP_001040978,NP_001040978.2,Protein CPT-2, isoform a,R07H5.2,R07H5.2a,R07H5.…
DF5112@@@TRINITY_DN10928_c0_g1_i1.p1	cst-1	Serine/threonine-protein kinase cst-1; Serine/threonine-protein kinase which extends lifespan and delays tissue aging, probably by activating daf-16; Belongs to the protein kinase superfamily. STE Ser/Thr protein kinase family. STE20 subfamily	https://smart.embl.de/smart/DDvec.cgi?smart=497:S_TKc(35|286)+Pfam_Mst1_SARAH(446|493)+	180708,2.7.11.1,AAF75788.1,AF271359,CCD65402.1,CCD65403.1,CE39916,CE39917,CST1_CAEEL,Cel.10981,Cst-1,F14H12.4,F14H12.4a,F14H12.4b,NM_001029404,NM_001029404.3,NM_076342,NM_076342.5,NP_001024575,NP_001024575.2,NP_508743,NP_508743.4,Q2AAC7,Q9NB31,STE20-like kinase 1,STE20-like kinase MST,Serine/threonine kinase 3,Serine/threonine-protein kinase cst-1,UPI000007E9AC,UPI00006C5F42,WBGene00017472,cMST,c…
DF5112@@@TRINITY_DN9473_c0_g1_i1.p1	gba-1	Putative glucosylceramidase 1; Protein GBA-1, isoform a	https://smart.embl.de/smart/DDvec.cgi?smart=523:SIGNAL(1|23)+Pfam_Glyco_hydro_30(98|445)+Pfam_Glyco_hydro_30C(448|516)+	173574,3.2.1.45,A8DZ32,C33C12.3,C33C12.3a,C33C12.3b,CCD66449.1,CCD66450.1,CE29208,CE39682,Cel.9090,EC 3.2.1.45,GLCM1_CAEEL,Gba-1,Glucosylceramidase ,NM_001047285,NM_001047285.2,NM_001047286,NM_001047286.1,NP_001040750,NP_001040750.1,NP_001040751,NP_001040751.1,O16580,Protein GBA-1, isoform a,Putative glucosylceramidase 1,UPI000007AC60,UPI00006AB7C3,WBGene00016335,cel:CELE_C33C12.3,gba-1
DF5112@@@TRINITY_DN7576_c0_g3_i1.p1	mbk-1	Dual specificity tyrosine-phosphorylation-regulated kinase mbk-1; Possible role in the function of olfactory neurons; Belongs to the protein kinase superfamily. CMGC Ser/Thr protein kinase family. MNB/DYRK subfamily	https://smart.embl.de/smart/DDvec.cgi?smart=882:S_TKc(328|649)+COIL(756|798)+	181578,2.7.12.1,AAL40874.1,AY064464,CAA93756.2,CE33442,Cel.22462,Dual specificity Yak1-related kinase mbk-1,EC 2.7.12.1,MBK1_CAEEL,Mbk-1,Minibrain Kinase 1,NM_078059,NM_078059.4,NP_510460,NP_510460.2,Protein MBK-1 (mbk-1) mRNA, complete cds,Q22155,Q8WQL7,T04C10.1,UPI000000CA75,WBGene00003149,cel:CELE_T04C10.1,mbk-1
DF5112@@@TRINITY_DN8201_c0_g1_i1.p1	mec-18	Uncharacterized protein; Protein MEC-18 (mec-18) mRNA, complete cds	https://smart.embl.de/smart/DDvec.cgi?smart=638:Pfam_AMP-binding(23|492)+Pfam_AMP-binding_C(500|577)+	180701,C52B9.9,CCD65418.1,CE16940,CELE_C52B9.9,Cel.6964,Mec-18,NM_076330,NM_076330.4,NP_508731,NP_508731.3,O45873,O45873_CAEEL,Protein MEC-18 (mec-18) mRNA, complete cds,UPI000017CD77,Uncharacterized protein,WBGene00003179,cel:CELE_C52B9.9,mec-18
DF5112@@@TRINITY_DN14289_c0_g1_i1.p1	prdx-2	Thioredoxin domain-containing protein; PeRoxireDoXin; Protein PRDX-2, isoform a (prdx-2) mRNA, complete cds	https://smart.embl.de/smart/DDvec.cgi?smart=199:Pfam_Redoxin(10|158)+Pfam_1-cysPrx_C(163|198)+	1.11.1.24,266858,CCD68767.1,CCD68770.1,CE32361,CE41559,CELE_F09E5.15,EC 1.11.1.24,F09E5.15,F09E5.15a,F09E5.15b,H2KZL7,H2KZL7_CAEEL,NM_001129132,NM_001129132.2,NM_182252,NM_182252.5,NP_001122604,NP_001122604.1,NP_001367731,NP_872052,NP_872052.1,PeRoxireDoXin,Peroxiredoxin 1 ,Prdx-2,Q8IG31,Thioredoxin domain-containing protein,UPI00000851E6,UPI00015D7722,WBGene00006434,cel:CELE_F09E5.15,prdx-2
DF5112@@@TRINITY_DN6166_c0_g2_i1.p1	set-14	[histone h3]-lysine4/36 n-trimethyltransferase smyd; Protein SET-14 (set-14) mRNA, complete cds	https://smart.embl.de/smart/DDvec.cgi?smart=429:Pfam_zf-MYND(26|64)+	174662,2.1.1.354,2.1.1.357,CAA86783.1,CE16303,Cel.4933,EC 2.1.1.354,EC 2.1.1.357,NM_063922,NM_063922.4,NP_496323,NP_496323.1,Protein SET-14 (set-14) mRNA, complete cds,Q09414,Q09415,R06F6.4,SET domain-containing protein 14,SET14_CAEEL,Set-14,UPI000013BFEA,WBGene00011068,cel:CELE_R06F6.4,set-14
DF5112@@@TRINITY_DN583_c0_g1_i1.p1	snx-27	Sorting nexin-27; Sorting NeXin; Protein SNX-27 (snx-27) mRNA, complete cds	https://smart.embl.de/smart/DDvec.cgi?smart=578:PDZ(57|142)+PX(167|271)+COIL(402|425)+	172937,CAB02091.1,CE09647,CELE_F25H2.2,Cel.17285,F25H2.2,NM_060357,NM_060357.4,NP_492758,NP_492758.1,Protein SNX-27 (snx-27) mRNA, complete cds,Q93566,Q93566_CAEEL,Snx-27,Sorting NeXin,Sorting nexin-27,UPI000007952B,WBGene00009116,Z79754,cel:CELE_F25H2.2,snx-27
DF5112@@@TRINITY_DN4201_c0_g1_i1.p1	tomm-20	Mitochondrial import receptor subunit TOM20 homolog; Central component of the receptor complex responsible for the recognition and translocation of cytosolically synthesized mitochondrial preproteins (By similarity). Together with tomm-22 functions as the transit peptide receptor at the surface of the mitochondrion outer membrane and facilitates the movement of preproteins into the translocation …	https://smart.embl.de/smart/DDvec.cgi?smart=188:Pfam_MAS20(17|138)+	179691,CAA98945.1,CE05705,Cel.3921,F23H12.2,F23H12.2.1,Mitochondrial 20 kDa outer membrane protein,Mitochondrial import receptor subunit TOM20,NM_073691,NM_073691.5,NP_506092,NP_506092.1,Outer mitochondrial membrane receptor TOM20,Protein TOMM-20 (tomm-20) mRNA, complete cds,Q19766,TOM20_CAEEL,Tomm-20,UPI0000130CA2,WBGene00009092,cel:CELE_F23H12.2,tomm-20
DF5112@@@TRINITY_DN4554_c0_g1_i1.p1	tram-1	Translocating chain-associated membrane protein; Protein TRAM-1, isoform a (tram-1) mRNA, complete cds; Belongs to the TRAM family	https://smart.embl.de/smart/DDvec.cgi?smart=373:Pfam_TRAM1(52|121)+TLC(123|339)+	177902,C24F3.1,C24F3.1a,C24F3.1b,C24F3.1b.1,CAA18770.1,CAA18772.1,CE18517,CE18518,CELE_C24F3.1,Cel.17443,Cel.33548,NM_069467,NM_069467.4,NM_069468,NM_069468.3,NP_501868,NP_501868.1,NP_501869,NP_501869.1,Q9U3P5,Q9XXK7,Q9XXK7_CAEEL,Tram-1,Translocating chain-associated membrane protein,UPI0000077F98,UPI000008164B,WBGene00007696,cel:CELE_C24F3.1,tram-1
DF5112@@@TRINITY_DN4034_c0_g1_i1.p1	unc-115	Actin-binding lim protein; Protein UNC-115, isoform b (unc-115) mRNA, complete cds	https://smart.embl.de/smart/DDvec.cgi?smart=639:LIM(18|70)+LIM(130|181)+LIM(189|241)+VHP(604|639)+	181227,AAC35506.1,AF068867,Actin-binding LIM protein,CAA90057.1,CAC70079.1,CE02176,CE15759,CELE_F09B9.2,Cel.17255,Cel.34093,F09B9.2,F09B9.2a,F09B9.2b,NM_001029371,NM_001029371.3,NM_077301,NM_077301.7,NP_001024542,NP_001024542.1,NP_509702,NP_509702.3,O77133,Q19240,Q95QM5,Q95QM5_CAEEL,UPI000007E2DF,UPI0000081D6D,Unc-115,Uncharacterized protein,WBGene00006839,cel:CELE_F09B9.2,unc-115
DF5112@@@TRINITY_DN1701_c0_g1_i1.p1	unc-31	Calcium-dependent secretion activator; Calcium-binding protein involved in exocytosis of vesicles filled with neurotransmitters and neuropeptides. Probably acts upstream of fusion in the biogenesis or maintenance of mature secretory vesicles. May specifically mediate the Ca(2+)-dependent exocytosis of large dense-core vesicles (DCVs) and other dense- core vesicles (By similarity). Specifically re…	https://smart.embl.de/smart/DDvec.cgi?smart=1385:COIL(121|147)+C2(455|553)+PH(577|684)+DUF1041(888|980)+	178233,C1P637,CAA93520.6,CAPS_CAEEL,CAX65097.2,CBK19526.1,CBK19527.1,CBK19528.1,CBK19529.1,CCD31175.1,CCG28130.1,CCG28131.1,CE44563,CE44601,CE44637,CE44651,CE44675,CE44694,CE46219,CE47155,CE47452,Calcium-dependent secretion activator,Cel.12250,D3YT40,D3YT41,D3YT42,D3YT43,G3MU01,H9G2V2,H9G2V3,NM_001268734,NM_001268734.1,NM_001268735,NM_001268735.1,NM_001268736,NM_001268736.1,NM_001268737,NM_001268…
DF5112@@@TRINITY_DN5976_c0_g1_i1.p1	vha-1	V-type h+-transporting atpase 16kda proteolipid subunit; V-type proton ATPase 16 kDa proteolipid subunit 1; Proton-conducting pore forming subunit of the membrane integral V0 complex of vacuolar ATPase. V-ATPase is responsible for acidifying a variety of intracellular compartments in eukaryotic cells	https://smart.embl.de/smart/DDvec.cgi?smart=169:Pfam_ATP-synt_C(28|87)+Pfam_ATP-synt_C(107|166)+	176383,AB000917,BAA22595.1,CAA82354.1,CE06291,Cel.19685,NM_066764,NM_066764.5,NP_499165,NP_499165.1,Protein VHA-1 (vha-1) mRNA, complete cds,Q21898,R10E11.8,R10E11.8.1,R10E11.8.2,R10E11.8.3,UPI00001380CE,V-ATPase 16 kDa proteolipid subunit 1,VATL1_CAEEL,Vha-1,WBGene00006910,cel:CELE_R10E11.8,vha-1
DF5112@@@TRINITY_DN168_c0_g3_i1.p1	wsp-1	WASP (Actin cytoskeleton modulator) homolog; Protein WSP-1, isoform b (wsp-1) mRNA, complete cds	https://smart.embl.de/smart/DDvec.cgi?smart=781:PBD(432|466)+WH2(676|693)+WH2(707|724)+	177616,C07G1.4,C07G1.4a,C07G1.4b,CCD61396.1,CCD61397.1,CE32572,CE32573,CELE_C07G1.4,Cel.17157,Cel.34196,NM_171393,NM_171393.5,NM_171394,NM_171394.2,NP_741459,NP_741459.2,NP_741460,NP_741460.2,Neural Wiskott-Aldrich syndrome protein,Q17795,Q8MQE6,Q8MQE6_CAEEL,UPI00000839BA,UPI00000839BB,WASP (Actin cytoskeleton modulator) homolog,WASP (actin cytoskeleton modulator) homolog,WBGene00006957,Wsp-1,cel…

## Sheet: Cdrosophilae_Enrichment
cluster.number	#category	term ID	term description	observed gene count	background gene count	strength	false discovery rate	matching proteins in your network (IDs)	matching proteins in your network (labels)
4	STRING clusters	6239_CL:26095	Mixed, incl. nad(p)-binding domain, and fkbp-type peptidyl-prolyl cis-trans isomerase	2	13	2.67	0.02	6239.C05C8.3,6239.F52B11.3	fkb-3,noah-2
3	KEGG	map00280	Valine, leucine and isoleucine degradation	2	44	1.96	0.0218	6239.F01G10.2,6239.F56B3.5	ech-8,ech-5
3	WikiPathways	WP1451	Valine, leucine and isoleucine degradation	2	28	2.16	0.004	6239.F01G10.2,6239.F56B3.5	ech-8,ech-5
1	GO Function	GO:0051082	Unfolded protein binding	4	50	1.46	0.02	6239.C34C12.8,6239.F43E2.8.1,6239.T10B5.5a,6239.Y38A10A.5.1	C34C12.8,hsp-4,cct-7,crt-1
1	KEGG	map03010	Ribosome	4	118	1.08	0.0388	6239.B0041.4,6239.D1007.6.2,6239.F10E7.7.2,6239.Y71F9AL.13a.1	rpl-4,rps-10,rpl-33,rpl-1
1	WikiPathways	WP540	Cytoplasmic ribosomal proteins	4	58	1.39	0.0012	6239.B0041.4,6239.D1007.6.2,6239.F10E7.7.2,6239.Y71F9AL.13a.1	rpl-4,rps-10,rpl-33,rpl-1
1	WikiPathways	WP2578	ER stress-unfolded protein response (UPRer)	2	10	1.85	0.0135	6239.F43E2.8.1,6239.Y38A10A.5.1	hsp-4,crt-1
1	WikiPathways	WP525	Mitochondrial unfolded-protein response	4	214	0.83	0.0497	6239.B0041.4,6239.F10E7.7.2,6239.W03F8.3,6239.Y71F9AL.13a.1	rpl-4,rpl-33,W03F8.3,rpl-1
1	UniProt Keywords	KW-0143	Chaperone	4	42	1.53	0.0024	6239.C34C12.8,6239.F43E2.8.1,6239.T10B5.5a,6239.Y38A10A.5.1	C34C12.8,hsp-4,cct-7,crt-1
2	GO Component	GO:0005739	Mitochondrion	6	467	1.11	0.0002	6239.B0035.15,6239.C35D10.4,6239.C50B8.3,6239.F43G9.1,6239.F56D2.1,6239.T10E9.7a	B0035.15,coq-8,nuaf-1,idha-1,ucr-1,nuo-2
2	GO Component	GO:0005743	Mitochondrial inner membrane	4	132	1.49	0.0016	6239.C35D10.4,6239.C50B8.3,6239.F56D2.1,6239.T10E9.7a	coq-8,nuaf-1,ucr-1,nuo-2
2	GO Component	GO:0070469	Respirasome	3	46	1.82	0.0019	6239.C50B8.3,6239.F56D2.1,6239.T10E9.7a	nuaf-1,ucr-1,nuo-2
2	GO Component	GO:0098798	Mitochondrial protein complex	3	139	1.34	0.0247	6239.C50B8.3,6239.F56D2.1,6239.T10E9.7a	nuaf-1,ucr-1,nuo-2
2	GO Component	GO:0005747	Mitochondrial respiratory chain complex i	2	30	1.83	0.0373	6239.C50B8.3,6239.T10E9.7a	nuaf-1,nuo-2
2	STRING clusters	6239_CL:9661	Oxidative phosphorylation	4	60	1.83	0.00058	6239.B0035.15,6239.C50B8.3,6239.F56D2.1,6239.T10E9.7a	B0035.15,nuaf-1,ucr-1,nuo-2
2	STRING clusters	6239_CL:9820	NADH dehydrogenase complex assembly, and ECSIT, C-terminal domain	2	5	2.61	0.012	6239.B0035.15,6239.C50B8.3	B0035.15,nuaf-1
2	COMPARTMENTS	GOCC:0005739	Mitochondrion	5	235	1.33	0.00062	6239.C35D10.4,6239.C50B8.3,6239.F43G9.1,6239.F56D2.1,6239.T10E9.7a	coq-8,nuaf-1,idha-1,ucr-1,nuo-2
2	COMPARTMENTS	GOCC:0098798	Mitochondrial protein complex	3	81	1.57	0.0289	6239.C35D10.4,6239.F56D2.1,6239.T10E9.7a	coq-8,ucr-1,nuo-2
2	UniProt Keywords	KW-0496	Mitochondrion	4	212	1.28	0.0084	6239.C35D10.4,6239.C50B8.3,6239.F43G9.1,6239.F56D2.1	coq-8,nuaf-1,idha-1,ucr-1
2	UniProt Keywords	KW-0809	Transit peptide	3	107	1.45	0.0213	6239.C35D10.4,6239.C50B8.3,6239.F43G9.1	coq-8,nuaf-1,idha-1

## Sheet: Cinopinata
Trinity_name	protein.id	domain_summary_url	annotation	other_names_and_aliases	X.clustering.method	cluster.number	cluster.color	gene.count	protein.description
cinopinata@@@TRINITY_DN4659_c0_g1_i1.p1	C48B6.2	U3 small nucleolar ribonucleoprotein protein IMP3; Putative 40S ribosomal protein S4-like; Protein C48B6.2 (C48B6.2) mRNA, complete cds	https://smart.embl.de/smart/DDvec.cgi?smart=183:Ribosomal_S4(4|107)+S4(108|175)+	172420,C48B6.2,CCD67579.1,CE08804,NM_059571,NM_059571.5,NP_491972,NP_491972.1,O01513,Protein C48B6.2 (C48B6.2) mRNA, complete cds,Putative 40S ribosomal protein S4-like,UPI000013C056,WBGene00016740,YS4L_CAEEL,cel:CELE_C48B6.2	MCL	1	Red	3	U3 small nucleolar ribonucleoprotein protein IMP3; Putative 40S ribosomal protein S4-like; Protein C48B6.2 (C48B6.2) mRNA, complete cds
cinopinata@@@TRINITY_DN13356_c0_g1_i1.p1	H35B03.2	Ribonuclease p/mrp protein subunit rpp1; Protein H35B03.2, isoform a	https://smart.embl.de/smart/DDvec.cgi?smart=393:Pfam_RNase_P_p30(33|295)+	177349,3.1.26.5,CCD67377.1,CCD67378.1,CE19505,CE19506,CELE_H35B03.2,Cel.18199,EC 3.1.26.5,FO080871,H35B03.2,H35B03.2a,H35B03.2b,H35B03.2c,NM_001306862.1,NM_068451,NM_068451.5,NM_068452,NM_068452.1,NP_001293791,NP_001293791.1,NP_500852,NP_500852.1,NP_500853,NP_500853.1,Protein H35B03.2, isoform a,Q9TYZ2,Q9TYZ3,Ribonuclease P/MRP protein subunit RPP1 ,UPI00000776FC,UPI0000082F80,Uncharacterized pro…	MCL	1	Red	3	Ribonuclease p/mrp protein subunit rpp1; Protein H35B03.2, isoform a
cinopinata@@@TRINITY_DN1805_c0_g1_i1.p1	eif-1.A	S1-like domain-containing protein; Eukaryotic Initiation Factor; Seems to be required for maximal rate of protein biosynthesis. Enhances ribosome dissociation into subunits and stabilizes the binding of the initiator Met-tRNA(I) to 40 S ribosomal subunits	https://smart.embl.de/smart/DDvec.cgi?smart=216:eIF1a(28|110)+	177254,CCD72218.1,CE17962,CELE_H06H21.3,Eif-1.A,Eukaryotic Initiation Factor,H06H21.3,NM_068249,NM_068249.4,NP_500650,NP_500650.1,Protein EIF-1.A (eif-1.A) mRNA, complete cds,Q9TXU7,Q9TXU7_CAEEL,S1-like domain-containing protein,Translation initiation factor 1A,UPI000007F75C,WBGene00019162,cel:CELE_H06H21.3,eif-1.A,eif-1.a	MCL	1	Red	3	S1-like domain-containing protein; Eukaryotic Initiation Factor; Seems to be required for maximal rate of protein biosynthesis. Enhances ribosome dissociation into subunits and stabilizes the binding of the initiator Met-tRNA(I) to 40 S ribosomal subunits
cinopinata@@@TRINITY_DN4471_c0_g1_i1.p1	F13D12.5	Uncharacterized protein; Protein F13D12.5 (F13D12.5) mRNA, complete cds	https://smart.embl.de/smart/DDvec.cgi?smart=421:SIGNAL(1|22)+TRANS(351|373)+	174799,CAA88945.1,CE02184,CELE_F13D12.5,F13D12.5,NM_064103,NM_064103.3,NP_496504,NP_496504.1,Protein F13D12.5 (F13D12.5) mRNA, complete cds,Q19393,Q19393_CAEEL,UPI00000791FD,Uncharacterized protein,WBGene00008740,cel:CELE_F13D12.5
cinopinata@@@TRINITY_DN5501_c0_g1_i1.p1	F17C11.4	Uncharacterized protein; Protein F17C11.4 (F17C11.4) mRNA, complete cds	http://smart.embl.de/smart/DDt.cgi?smart=250:	179518,CAA96626.1,CCW45979.1,CE05651,CE48364,CELE_F17C11.4,F17C11.4,F17C11.4a,F17C11.4b,N1NVB6,N1NVB6_CAEEL,NM_001307764.1,NM_073393,NM_073393.4,NP_001294693,NP_001294693.1,NP_505794,NP_505794.1,Protein F17C11.4 (F17C11.4) mRNA, complete cds,Q19515,UPI000007E91C,UPI000327B324,Uncharacterized protein,WBGene00008915,cel:CELE_F17C11.4
cinopinata@@@TRINITY_DN6644_c0_g1_i1.p1	F36D1.9	Uncharacterized protein; Protein F36D1.9 (F36D1.9) mRNA, complete cds	http://smart.embl.de/smart/DDt.cgi?smart=124:	3564898,CAH04749.1,CE36434,CELE_F36D1.9,Cel.30830,F36D1.9,NM_001026282,NM_001026282.1,NP_001021453,NP_001021453.1,Protein F36D1.9 (F36D1.9) mRNA, complete cds,Q6BER4,Q6BER4_CAEEL,UPI0000253F24,Uncharacterized protein,WBGene00009468,cel:CELE_F36D1.9
cinopinata@@@TRINITY_DN4915_c0_g1_i1.p2	F48E8.2	Uncharacterized protein; Protein F48E8.2 (F48E8.2) mRNA, complete cds	https://smart.embl.de/smart/DDvec.cgi?smart=467:Pfam_Eapp_C(330|465)+	175752,CCD71511.1,CE39157,CELE_F48E8.2,Cel.10455,F48E8.2,NM_065764,NM_065764.3,NP_498165,NP_498165.2,Protein F48E8.2 (F48E8.2) mRNA, complete cds,Q09395,Q09395_CAEEL,UPI00004B7638,Uncharacterized protein,WBGene00018609,cel:CELE_F48E8.2
cinopinata@@@TRINITY_DN1425_c0_g1_i1.p1	F49C12.7	Chk domain-containing protein; Protein F49C12.7, isoform b	https://smart.embl.de/smart/DDvec.cgi?smart=448:CHK(186|369)+	177751,CAA92511.1,CAJ80809.1,CAJ80810.1,CE03367,CE39936,CE39937,CELE_F49C12.7,CHK domain-containing protein,Cel.12909,F49C12.7,F49C12.7a,F49C12.7b,F49C12.7c.1,F49C12.7c.2,NM_001047482,NM_001047482.1,NM_001047483,NM_001047483.2,NM_001047484,NM_001047484.2,NP_001040947,NP_001040947.1,NP_001040948,NP_001040948.1,NP_001040949,NP_001040949.1,Protein F49C12.7, isoform b,Q20584,Q27GQ5,Q27GQ6,Q27GQ6_CAEE…
cinopinata@@@TRINITY_DN22560_c0_g1_i1.p1	K02F3.9	Uncharacterized protein; Protein K02F3.9 (K02F3.9) mRNA, complete cds	https://smart.embl.de/smart/DDvec.cgi?smart=156:SIGNAL(1|22)+	175241,CCD61876.1,CE01355,CELE_K02F3.9,Cel.20537,K02F3.9,NM_064871,NM_064871.5,NP_497272,NP_497272.1,Protein K02F3.9 (K02F3.9) mRNA, complete cds,Q21151,Q21151_CAEEL,UPI00000780E2,Uncharacterized protein,WBGene00019332,cel:CELE_K02F3.9
cinopinata@@@TRINITY_DN18516_c0_g1_i1.p1	K05F1.5	LEukocyte cell-derived ChemoTaxin 2 (LECT-2) homolog; Protein K05F1.5 (K05F1.5) mRNA, complete cds	https://smart.embl.de/smart/DDvec.cgi?smart=472:ZnF_C2H2(23|48)+ZnF_C2H2(123|144)+Pfam_Peptidase_M23(194|303)+	173978,A0A1B1LVF5,CCD69144.1,CE28587,CELE_K05F1.5,Cel.14813,FO081106,K05F1.5,LECT-2,Lect-2,NM_062740,NM_062740.4,NM_062740.5,NP_495141,NP_495141.1,NP_495141.2,Peptidase_M23 domain-containing protein,Protein K05F1.5 (K05F1.5) mRNA, complete cds,Q21241,Q21241_CAEEL,UPI0000075988,WBGene00019407,cel:CELE_K05F1.5,lect-2
cinopinata@@@TRINITY_DN343_c0_g1_i5.p1	K10D3.4	Uncharacterized protein; Protein K10D3.4 (K10D3.4) mRNA, complete cds	https://smart.embl.de/smart/DDvec.cgi?smart=922:SIGNAL(1|17)+Pfam_EB(46|105)+KU(169|226)+KU(279|353)+WR1(355|405)+KU(409|462)+WR1(468|513)+KU(517|571)+WR1(573|623)+KU(627|682)+WR1(684|736)+WR1(743|793)+WR1(862|914)+	172452,CAA99886.1,CE06173,CELE_K10D3.4,Cel.17610,I02.054,K10D3.4,NM_059619,NM_059619.3,NP_492020,NP_492020.1,Protein K10D3.4 (K10D3.4) mRNA, complete cds,Q21418,Q21418_CAEEL,UPI00000762C2,Uncharacterized protein,WBGene00010738,Z75545,cel:CELE_K10D3.4
cinopinata@@@TRINITY_DN1118_c0_g1_i1.p1	K11G12.6	Lipase maturation factor; Involved in the maturation of specific proteins in the endoplasmic reticulum	https://smart.embl.de/smart/DDvec.cgi?smart=624:TRANS(13|35)+TRANS(69|91)+Pfam_LMF1(122|553)+	180941,CCD70798.1,CCD70801.1,CE34339,CE41829,CELE_K11G12.6,Cel.17785,K11G12.6,K11G12.6a,K11G12.6b,Lipase maturation factor,NM_001047808,NM_001047808.2,NM_001047809,NM_001047809.3,NP_001041273,NP_001041273.1,NP_001041274,NP_001041274.2,Protein K11G12.6, isoform b,Q21435,Q2L6Y0,Q2L6Y0_CAEEL,UPI00001A3693,UPI0001611BB5,WBGene00019657,cel:CELE_K11G12.6
cinopinata@@@TRINITY_DN8363_c0_g1_i1.p1	T22B7.7	Uncharacterized protein; Protein T22B7.7 (T22B7.7) mRNA, complete cds	http://smart.embl.de/smart/DDt.cgi?smart=393:	180832,CCD74414.1,CE13952,CELE_T22B7.7,NM_076553,NM_076553.6,NP_001362037,NP_508954,NP_508954.1,Protein T22B7.7 (T22B7.7) mRNA, complete cds,Q23044,Q23044_CAEEL,T22B7.7,UPI000007B23C,Uncharacterized protein,WBGene00020674,cel:CELE_T22B7.7
cinopinata@@@TRINITY_DN20294_c0_g1_i1.p1	W03F11.1	Uterine Lumin Expressed/locailized; Protein W03F11.1 (W03F11.1) mRNA, complete cds	https://smart.embl.de/smart/DDvec.cgi?smart=235:SIGNAL(1|16)+ChtBD2(19|68)+ChtBD2(86|138)+ChtBD2(154|210)+	171778,CCD69309.1,CE14542,CELE_W03F11.1,NM_058541,NM_058541.6,NP_490942,NP_490942.1,O01780,O01780_CAEEL,Protein W03F11.1 (W03F11.1) mRNA, complete cds,UPI0000079357,Ule-1,Uterine Lumin Expressed/locailized,W03F11.1,W03F11.1a,WBGene00021005,cel:CELE_W03F11.1,ule-1
cinopinata@@@TRINITY_DN352_c0_g1_i2.p1	Y38E10A.22	Uncharacterized protein; Protein Y38E10A.22, isoform a	https://smart.embl.de/smart/DDvec.cgi?smart=428:COIL(401|428)+	189667,CAB54414.2,CBZ01826.2,CCE72311.2,CE35653,CE47846,CE47962,CELE_Y38E10A.22,E8MDV8,H2KMK6,H2KMK6_CAEEL,NM_001267423,NM_001267423.2,NM_001267424,NM_001267424.1,NM_001267425,NM_001267425.2,NP_001254352,NP_001254352.2,NP_001254353,NP_001254353.1,NP_001254354,NP_001254354.2,Protein Y38E10A.22, isoform a,Q9NAI9,UPI00001C0831,UPI00029968A2,UPI0002996FA8,Uncharacterized protein,WBGene00012600,Y38E10…
cinopinata@@@TRINITY_DN6437_c0_g1_i1.p1	Y48G10A.3	Uncharacterized protein; Protein Y48G10A.3 (Y48G10A.3) mRNA, complete cds	https://smart.embl.de/smart/DDvec.cgi?smart=343:Pfam_Ndr(26|314)+	173217,CAB63372.1,CE25314,CELE_Y48G10A.3,Cel.5422,NM_060968,NM_060968.4,NP_493369,NP_493369.1,Protein Y48G10A.3 (Y48G10A.3) mRNA, complete cds,Q9U283,Q9U283_CAEEL,UPI000007D5DE,Uncharacterized protein,WBGene00013020,Y48G10A.3,cel:CELE_Y48G10A.3
cinopinata@@@TRINITY_DN20502_c0_g1_i1.p1	Y48G1C.9	Sm domain-containing protein; Protein Y48G1C.9 (Y48G1C.9) mRNA, complete cds	https://smart.embl.de/smart/DDvec.cgi?smart=103:Sm(25|94)+	3565103,CCD71728.1,CE38571,CELE_Y48G1C.9,NM_058270,NM_058270.4,NP_001367886,NP_490671,NP_490671.2,Protein Y48G1C.9 (Y48G1C.9) mRNA, complete cds,Q9BL76,Q9BL76_CAEEL,Sm domain-containing protein,UPI0000505743,Uncharacterized protein,WBGene00021682,Y48G1C.9,Y48G1C.9.1,Y48G1C.9.2,cel:CELE_Y48G1C.9
cinopinata@@@TRINITY_DN5797_c0_g1_i1.p1	Y53G8AL.2	Nadh dehydrogenase (ubiquinone) 1 alpha subcomplex subunit 9; Protein Y53G8AL.2 (Y53G8AL.2) mRNA, complete cds	https://smart.embl.de/smart/DDvec.cgi?smart=431:Pfam_NmrA(62|302)+	175429,CCD72292.1,CE26163,CELE_Y53G8AL.2,Cel.33269,Cel.5089,NAD(P)-bd_dom domain-containing protein,NM_065274,NM_065274.5,NP_497675,NP_497675.1,Nduf-9,Protein Y53G8AL.2 (Y53G8AL.2) mRNA, complete cds,Q9N3H3,Q9N3H3_CAEEL,UPI000007D983,Uncharacterized protein,WBGene00021800,Y53G8AL.2,Y53G8AL.2.1,cel:CELE_Y53G8AL.2,nduf-9
cinopinata@@@TRINITY_DN8310_c0_g1_i1.p1	aps-1	AP complex subunit sigma; Protein APS-1 (aps-1) mRNA, complete cds; Belongs to the adaptor complexes small subunit family	https://smart.embl.de/smart/DDvec.cgi?smart=157:Pfam_Clat_adaptor_s(1|142)+	178989,AP complex subunit sigma,AP-1 complex subunit sigma 1/2,Aps-1,CCD64132.1,CE09797,CELE_F29G9.3,F29G9.3,NM_072158,NM_072158.4,NP_001370416,NP_504559,NP_504559.1,O16369,O16369_CAEEL,Protein APS-1 (aps-1) mRNA, complete cds,UPI0000080518,WBGene00000159,aps-1,cel:CELE_F29G9.3
cinopinata@@@TRINITY_DN21297_c0_g1_i1.p1	bag-1	BAG family molecular chaperone regulator 1; May inhibit the chaperone activity of HSP70/HSC70 by promoting substrate release in an ATP-dependent manner	https://smart.embl.de/smart/DDvec.cgi?smart=210:Pfam_ubiquitin(23|83)+BAG(108|194)+	172373,1T7S,AAD16125.1,AF095788,BAG family molecular chaperone regulator 1,BAG1_CAEEL,BCL2-associated athanogene 1,Bag-1,CCD71479.1,CE11318,Cel.23233,F57B10.11,NM_059492,NM_059492.5,NP_491893,NP_491893.1,O44739,Protein BAG-1 (bag-1) mRNA, complete cds,UPI000007BF81,WBGene00000236,bag-1,cel:CELE_F57B10.11
cinopinata@@@TRINITY_DN20300_c0_g1_i1.p1	clk-1	5-demethoxyubiquinone hydroxylase, mitochondrial; Catalyzes the hydroxylation of 2-polyprenyl-3-methyl-6- methoxy-1,4-benzoquinol (DMQH2) during ubiquinone biosynthesis. Has also a structural role in the COQ enzyme complex, stabilizing other COQ polypeptides. Involved in lifespan determination in a ubiquinone-independent manner; Belongs to the COQ7 family	https://smart.embl.de/smart/DDvec.cgi?smart=187:Pfam_COQ7(18|187)+	1.14.13.-,1.14.99.60,175729,3-demethoxyubiquinol 3-hydroxylase ,5-demethoxyubiquinone hydroxylase, mitochondrial,CCD66658.1,CE01438,COQ7_CAEEL,Clk-1,Clock abnormal protein 1,DMQ hydroxylase,EC 1.14.99.60,FO080775,NM_065727,NM_065727.3,NP_498128,NP_498128.1,P48376,Protein CLK-1 (clk-1) mRNA, complete cds,Protein clk-1,UPI0000127F03,Ubiquinone biosynthesis monooxygenase COQ7,Ubiquinone biosynthesis…
cinopinata@@@TRINITY_DN6379_c0_g1_i1.p1	cogc-5	Conserved oligomeric golgi complex subunit 5; Conserved Oligomeric Golgi (COG) Component; Protein COGC-5 (cogc-5) mRNA, complete cds	http://smart.embl.de/smart/DDt.cgi?smart=656:	172025,C43E11.11,C43E11.11.1,C43E11.11.2,CCD65163.1,CE32607,CELE_C43E11.11,Cel.7356,Cogc-5,Conserved Oligomeric Golgi (COG) Component,Conserved oligomeric Golgi complex subunit 5,NM_058938,NM_058938.5,NP_491339,NP_491339.2,P91151,P91151_CAEEL,Protein COGC-5 (cogc-5) mRNA, complete cds,UPI00000839EC,WBGene00016608,cel:CELE_C43E11.11,cogc-5
cinopinata@@@TRINITY_DN5199_c0_g1_i2.p1	dod-18	Downstream Of DAF-16 (Regulated by DAF-16); Protein DOD-18 (dod-18) mRNA, complete cds	https://smart.embl.de/smart/DDvec.cgi?smart=197:Pfam_Maf(5|193)+	183813,C54G4.6,CAA99818.2,CE42082,CELE_C54G4.6,Cel.37001,Dod-18,Downstream Of DAF-16 (Regulated by DAF-16),Downstream Of DAF-16 (regulated by DAF-16),NM_059804,NM_059804.2,NP_492205,NP_492205.2,Protein DOD-18 (dod-18) mRNA, complete cds,Q18851,Q18851_CAEEL,Septum formation protein,UPI000163FF25,WBGene00008316,Z75533,cel:CELE_C54G4.6,dod-18
cinopinata@@@TRINITY_DN21520_c0_g1_i1.p1	grl-21	Ground-like domain-containing protein; GRound-Like (Grd related); Protein GRL-21 (grl-21) mRNA, complete cds	https://smart.embl.de/smart/DDvec.cgi?smart=172:SIGNAL(1|18)+Pfam_Ground-like(98|170)+	177967,CAA94385.1,CE06571,CELE_ZC168.5,Cel.11637,GRound-Like (Grd related),Grl-21,Ground-like domain-containing protein,NM_069587,NM_069587.6,NP_501988,NP_501988.1,Protein GRL-21 (grl-21) mRNA, complete cds,Q23248,Q23248_CAEEL,UPI00000813B6,WBGene00001730,ZC168.5,cel:CELE_ZC168.5,grl-21
cinopinata@@@TRINITY_DN7549_c0_g1_i1.p1	grp-1	GTP exchange factor for ARFs 1; Promotes guanine-nucleotide exchange on ARF. Promotes the activation of ARF through replacement of GDP with GTP (By similarity). Plays a role in cell shedding during embryogenesis, probably by promoting the endocytosis of cell adhesion molecules	https://smart.embl.de/smart/DDvec.cgi?smart=393:COIL(18|53)+Sec7(57|241)+PH(262|382)+	176140,AJ236896,CAB38534.1,CCD64454.1,CE26942,Cel.17291,Cytohesin,GRP1_CAEEL,GTP exchange factor for ARFs 1,Grp-1,K06H7.4,K06H7.4.1,NM_066363,NM_066363.3,NP_498764,NP_498764.1,P34512,Protein GRP-1 (grp-1) mRNA, complete cds,Q9UB38,UPI000013BA3E,WBGene00001743,cel:CELE_K06H7.4,grp-1
cinopinata@@@TRINITY_DN5111_c0_g1_i1.p1	lbp-5	Fatty acid-binding protein homolog 5; Protein LBP-5 (lbp-5) mRNA, complete cds; Belongs to the calycin superfamily. Fatty-acid binding protein (FABP) family	https://smart.embl.de/smart/DDvec.cgi?smart=136:Pfam_Lipocalin(7|135)+	191700,CCD68990.1,CE14430,FABP5_CAEEL,Fatty acid-binding protein 3, muscle and heart,Fatty acid-binding protein homolog 5,Lbp-5,NM_059527,NM_059527.3,NP_491928,NP_491928.1,O01814,Protein LBP-5 (lbp-5) mRNA, complete cds,UPI000007AF6F,W02D3.7,WBGene00002257,cel:CELE_W02D3.7,lbp-5
cinopinata@@@TRINITY_DN14453_c0_g1_i1.p1	ndx-1	Putative nudix hydrolase 1; Probably mediates the hydrolysis of some nucleoside diphosphate derivatives	https://smart.embl.de/smart/DDvec.cgi?smart=365:Pfam_NUDIX(72|197)+	173138,3.6.1.-,3.6.1.58,8-oxo-dGDP phosphatase ,CAB04835.1,CE14186,Cel.16689,EC 3.6.1.58,NDX1_CAEEL,NM_060808,NM_060808.1,NP_493209,NP_493209.1,Ndx-1,O45830,Protein NDX-1 (ndx-1) mRNA, complete cds,Putative nudix hydrolase 1,T26E3.2,UPI0000081A8A,WBGene00003578,cel:CELE_T26E3.2,ndx-1
cinopinata@@@TRINITY_DN16823_c0_g2_i1.p1	oxy-5	Uncharacterized protein; Protein OXY-5	https://smart.embl.de/smart/DDvec.cgi?smart=162:Pfam_S36_mt(90|158)+	24104659,A7DT45,A7DT45_CAEEL,CCD62969.1,CE41412,CELE_F56H1.7,F56H1.7,NM_001306475.1,NP_001293404,NP_001293404.1,Oxy-5,Protein OXY-5,UPI00004B606B,Uncharacterized protein,WBGene00045483,cel:CELE_F56H1.7,oxy-5
cinopinata@@@TRINITY_DN19590_c0_g1_i1.p1	prx-12	Putative peroxisome assembly protein 12; Required for protein import into peroxisomes	https://smart.embl.de/smart/DDvec.cgi?smart=359:Pfam_Pex2_Pex12(31|271)+RING(307|345)+	181331,CAA92113.1,CE03163,Cel.11049,F08B12.2,NM_001322631.1,NM_077507,NM_077507.5,NP_001309444,NP_001309444.1,NP_509908,NP_509908.1,PEX12_CAEEL,Peroxin-12,Protein PRX-12 (prx-12) mRNA, complete cds,Prx-12,Putative peroxisome assembly protein 12,Q19189,UPI0000131701,WBGene00004197,cel:CELE_F08B12.2,prx-12
cinopinata@@@TRINITY_DN2386_c0_g1_i1.p1	rab-10	Ras-related protein Rab-10; The small GTPases Rab are key regulators of intracellular membrane trafficking, from the formation of transport vesicles to their fusion with membranes. Rabs cycle between an inactive GDP-bound form and an active GTP-bound form that is able to recruit to membranes different set of downstream effectors directly responsible for vesicle formation, movement, tethering and …	https://smart.embl.de/smart/DDvec.cgi?smart=201:RAB(10|173)+	266836,AAB16972.1,AFP33152.1,CCD70773.1,CE14114,I7FXD6,JQ235188,NM_059456,NM_059456.4,NP_491857,NP_491857.1,Protein RAB-10 (rab-10) mRNA, complete cds,Q7JNM1,Q94148,RAB10_CAEEL,Rab-10,Ras-related protein Rab-10,T23H2.5,T23H2.5.1,T23H2.5.2,U68257,UPI000007C608,WBGene00004273,cel:CELE_T23H2.5,rab-10
cinopinata@@@TRINITY_DN1561_c0_g1_i1.p1	scpl-1	Carboxy-terminal domain rna polymerase ii polypeptide a small phosphatase; CTD small phosphatase-like protein 1; Phosphatase which may play a role in the egg laying muscles	https://smart.embl.de/smart/DDvec.cgi?smart=491:CPDc(310|453)+	181944,3.1.3.16,A5Z2W8,B0379.4,B0379.4a,B0379.4b,B0379.4c,CAD30428.2,CAD30429.2,CAN99655.1,CE34243,CE34244,CE41191,CTD small phosphatase-like protein 1,Cel.19296,EC 3.1.3.16,NM_001128939,NM_001128939.1,NM_170917,NM_170917.4,NM_170918,NM_170918.4,NP_001122411,NP_001122411.1,NP_001370133,NP_740911,NP_740911.2,NP_740912,NP_740912.2,Protein SCPL-1, isoform b,Q8T3G2,Q8T3G3,SCP-like 1,SCPL1_CAEEL,Scpl-…
cinopinata@@@TRINITY_DN19285_c0_g1_i1.p1	tac-1	Transforming acid coiled-coil-containing protein 1; Involved in microtubule formation, polymerization and assembly, regulating microtubule nucleation and length. Plays a role in pronuclear migration and mitotic and meiotic spindle elongation during early embryogenesis. In complex with zyg-9, functions during the early stages of embryonic development to regulate microtubule assembly throughout the…	https://smart.embl.de/smart/DDvec.cgi?smart=260:Pfam_TACC(107|244)+	175133,2P40,AAG49387.1,AF326937,CAA21677.1,CE20302,G5ECG0,NM_064658,NM_064658.6,NP_497059,NP_497059.1,Protein TAC-1 (tac-1) mRNA, complete cds,TACC1_CAEEL,Tac-1,UPI00000750F2,WBGene00006381,Y54E2A.3,cel:CELE_Y54E2A.3,tac-1
cinopinata@@@TRINITY_DN1814_c0_g1_i1.p1	ttr-54	TransThyretin-Related family domain; Protein TTR-54 (ttr-54) mRNA, complete cds	https://smart.embl.de/smart/DDvec.cgi?smart=138:SIGNAL(1|19)+Pfam_TTR-52(27|123)+	188506,CAA93096.1,CE06450,CELE_T14G10.4,Cel.12320,NM_069454,NM_069454.1,NP_001366759,NP_501855,NP_501855.1,Protein TTR-54 (ttr-54) mRNA, complete cds,Q22499,Q22499_CAEEL,T14G10.4,TransThyretin-Related family domain,Ttr-54,UPI000007C3C7,WBGene00011774,cel:CELE_T14G10.4,ttr-54
cinopinata@@@TRINITY_DN2976_c0_g1_i1.p1	usp-14	Ubiquitin carboxyl-terminal hydrolase 14; Proteasome-associated deubiquitinase which releases ubiquitin from the proteasome targeted ubiquitinated proteins. Ensures the regeneration of ubiquitin at the proteasome (By similarity)	https://smart.embl.de/smart/DDvec.cgi?smart=489:UBQ(2|71)+Pfam_UCH(102|455)+	175105,3.4.19.12,AAA74956.1,C13B4.2,C13B4.2.1,C19.A36,CAB03876.1,CE15615,Cel.19745,Cel.33686,Deubiquitinating enzyme 14,EC 3.4.19.12,NM_064605,NM_064605.8,NP_497006,NP_497006.1,O45248,Protein USP-14 (usp-14) mRNA, complete cds,Q17361,U32223,UBP14_CAEEL,UPI00001379F3,Ubiquitin carboxyl-terminal hydrolase 14,Ubiquitin carboxyl-terminal hydrolase 14 ,Ubiquitin thioesterase 14,Ubiquitin-specific-proc…

[truncated: 20 more sheets: Cinopinata_cluster, Cinopinata_Enrichment, Cjaponica, Cjaponica_cluster, Cjaponica_Enrichment, Cremanei, Cremanei_cluster, Cremanei_Enrichment, Otipulae, Otipulae_cluster, Otipulae_Enrichment, Ppacificus, Ppacificus_cluster, Ppacificus_Enrichment, Raxei, Raxei_cluster, Raxei_Enrichment, Rregina, Rregina_cluster, Rregina_Enrichment]
